# Supplementary material for: Increased accuracy and precision in igneous and detrital zircon geochronology using CA-LA-ICPMS
Source: Copernicus journal article supplement (doi:10.5194/gchron-2023-20), 2023-08-25
Supplement: Supplementary file 1 [file gchron-2023-20-supplement.zip]

**TABLE S9: 91500 LA-ICPMS U-Pb ZIRCON GEOCHRONOLOGY**

| Zircon #                       | Composition |             |      |                  | Ages            |                 |         |             |                 |         |                 |         |                  |         |        | % Disc. |        |
|--------------------------------|-------------|-------------|------|------------------|-----------------|-----------------|---------|-------------|-----------------|---------|-----------------|---------|------------------|---------|--------|---------|--------|
|                                | U (ppm)     | 206Pb/204Pb | U/Th | 206Pb/207Pb (2σ) | 207Pb/235U (2σ) | 206Pb/238U (2σ) | 2σ (2σ) | Error Corr. | 206Pb/238U (Ma) | 2σ (Ma) | 207Pb/235U (Ma) | 2σ (Ma) | 206Pb/207Pb (Ma) | 2σ (Ma) |        |         |        |
| 91500 no CA Run 1              |             |             |      |                  |                 |                 |         |             |                 |         |                 |         |                  |         |        |         |        |
| 91500-1                        | 72          | 11484       | 2.85 | 13.430           | 26.9            | 1.828           | 4.0     | 0.17811     | 3.0             | 0.756   | 1056.6          | 29.7    | 1055.5           | 26.5    | 1053.1 | 53.2    | -0.3   |
| 91500-2                        | 74          | 14269       | 2.83 | 13.400           | 26.8            | 1.857           | 3.9     | 0.18055     | 2.8             | 0.719   | 1070.0          | 27.4    | 1065.9           | 25.5    | 1057.6 | 54.0    | -1.2   |
| 91500-3                        | 63          | 14357       | 2.87 | 13.542           | 27.1            | 1.811           | 3.8     | 0.17793     | 2.9             | 0.763   | 1055.6          | 27.9    | 1049.3           | 24.6    | 1036.3 | 49.0    | -1.9   |
| 91500-5                        | 77          | 14029       | 2.82 | 13.374           | 26.7            | 1.836           | 3.9     | 0.17812     | 2.9             | 0.752   | 1056.7          | 28.2    | 1058.3           | 25.3    | 1061.5 | 51.1    | 0.5    |
| 91500-6                        | 77          | 7620        | 2.91 | 13.393           | 26.8            | 1.796           | 4.7     | 0.17451     | 3.5             | 0.758   | 1036.9          | 34.0    | 1043.9           | 30.5    | 1058.7 | 61.3    | 2.1    |
| 91500-8                        | 66          | 76895       | 2.99 | 13.564           | 27.1            | 1.810           | 6.9     | 0.17810     | 5.2             | 0.749   | 1056.6          | 50.5    | 1049.0           | 45.2    | 1033.1 | 92.5    | -2.3   |
| 91500-9                        | 67          | 5890        | 2.81 | 13.682           | 27.4            | 1.755           | 3.2     | 0.17427     | 2.7             | 0.860   | 1035.6          | 26.1    | 1029.2           | 20.5    | 1015.5 | 32.7    | -2.0   |
| 91500-10                       | 75          | 6004        | 2.92 | 13.085           | 26.2            | 1.834           | 6.8     | 0.17416     | 3.5             | 0.518   | 1035.0          | 33.7    | 1057.8           | 44.7    | 1105.3 | 116.3   | 6.4    |
| 91500-11                       | 68          | 9787        | 2.87 | 13.730           | 27.5            | 1.778           | 4.6     | 0.17715     | 3.6             | 0.778   | 1051.4          | 35.0    | 1037.5           | 30.2    | 1008.4 | 59.1    | -4.3   |
| 91500-12                       | 71          | 22374       | 3.02 | 13.585           | 27.2            | 1.772           | 4.5     | 0.17469     | 3.1             | 0.690   | 1037.9          | 29.8    | 1035.3           | 29.2    | 1029.9 | 65.9    | -0.8   |
| 91500-13                       | 58          | 4784        | 2.92 | 13.689           | 27.4            | 1.784           | 4.7     | 0.17722     | 3.1             | 0.660   | 1051.7          | 30.1    | 1039.7           | 30.6    | 1014.5 | 71.6    | -3.7   |
| 91500-14                       | 72          | 6618        | 2.90 | 13.740           | 27.5            | 1.754           | 5.6     | 0.17491     | 3.8             | 0.683   | 1039.1          | 36.6    | 1028.8           | 36.1    | 1006.9 | 82.7    | -3.2   |
| 91500-15                       | 73          | 10448       | 3.01 | 13.706           | 27.4            | 1.775           | 6.7     | 0.17651     | 5.3             | 0.790   | 1047.9          | 51.5    | 1036.3           | 43.7    | 1012.0 | 83.6    | -3.6   |
| 91500 no CA Run 1 (discordant) |             |             |      |                  |                 |                 |         |             |                 |         |                 |         |                  |         |        |         |        |
| 91500-4                        | 72          | 5414        | 2.90 | 13.859           | 27.7            | 1.747           | 6.2     | 0.17564     | 3.5             | 0.567   | 1043.1          | 33.7    | 1025.9           | 39.8    | 989.5  | 103.3   | -5.4   |
| 91500-7                        | 78          | 8783        | 2.71 | 13.964           | 27.9            | 1.743           | 2.9     | 0.17662     | 2.2             | 0.737   | 1048.5          | 21.0    | 1024.6           | 19.0    | 974.1  | 40.6    | -7.6   |
| 91500 no CA Run 2              |             |             |      |                  |                 |                 |         |             |                 |         |                 |         |                  |         |        |         |        |
| 91500 10                       | 60          | 432045      | 2.99 | 13.34            | 2.9             | 1.857           | 4.9     | 0.17976     | 3.9             | 0.804   | 1065.7          | 38.8    | 1065.9           | 32      | 1066.4 | 58.7    | 0.1    |
| 91500 11                       | 46          | 63264       | 3.16 | 13.46            | 3.3             | 1.8465          | 5.1     | 0.18028     | 3.9             | 0.762   | 1068.5          | 38      | 1062.2           | 33      | 1049.2 | 66.2    | -1.8   |
| 91500 12                       | 53          | 285731      | 3.25 | 13.26            | 3               | 1.851           | 4.8     | 0.17811     | 3.8             | 0.788   | 1056.7          | 37      | 1063.8           | 32      | 1078.4 | 59.5    | 2.0    |
| 91500 13                       | 76          | 54142       | 2.94 | 13.4             | 2.8             | 1.8462          | 4.1     | 0.17948     | 3.1             | 0.742   | 1064.1          | 30.2    | 1062.1           | 27      | 1058   | 56      | -0.6   |
| 91500 14                       | 65          | 114360      | 2.94 | 13.62            | 3.1             | 1.7752          | 6.2     | 0.17539     | 5.3             | 0.861   | 1041.7          | 51.4    | 1036.4           | 40      | 1025.2 | 63.7    | -1.6   |
| 91500 15                       | 71          | 213814      | 2.91 | 13.37            | 2.8             | 1.8394          | 3.5     | 0.17841     | 2.2             | 0.628   | 1058.3          | 21.7    | 1059.7           | 23      | 1062.4 | 55.4    | 0.4    |
| 91500 16                       | 63          | 81913       | 3.12 | 13.39            | 2.5             | 1.811           | 3.8     | 0.17594     | 2.8             | 0.735   | 1044.7          | 26.6    | 1049.4           | 25      | 1059.3 | 51.2    | 1.4    |
| 91500 17                       | 63          | 31127       | 3.04 | 13.54            | 2.5             | 1.7943          | 4       | 0.17631     | 3.2             | 0.789   | 1046.8          | 30.8    | 1043.4           | 26      | 1036.3 | 50.3    | -1.0   |
| 91500 18                       | 62          | 366302      | 2.92 | 13.4             | 2.3             | 1.8673          | 4.5     | 0.1816      | 3.9             | 0.862   | 1075.7          | 38.8    | 1069.6           | 30      | 1057   | 46.4    | -1.8   |
| 91500 19                       | 64          | 46412       | 3.03 | 13.52            | 3.4             | 1.8152          | 5       | 0.1781      | 3.6             | 0.731   | 1056.6          | 35.4    | 1051             | 33      | 1039.3 | 68.5    | -1.7   |
| 91500 2                        | 72          | 69741       | 2.96 | 13.58            | 3.2             | 1.8127          | 4.2     | 0.17864     | 2.7             | 0.646   | 1059.6          | 26.6    | 1050.1           | 28      | 1030.3 | 64.9    | -2.8   |
| 91500 20                       | 57          | 100000      | 2.97 | 13.48            | 3.8             | 1.8916          | 5.5     | 0.18501     | 4               | 0.723   | 1094.3          | 39.9    | 1078.2           | 36      | 1045.7 | 76.5    | -4.6   |
| 91500 21                       | 62          | 144706      | 3.05 | 13.61            | 2.3             | 1.778           | 4.4     | 0.1756      | 3.7             | 0.846   | 1042.9          | 35.9    | 1037.5           | 29      | 1026   | 47.5    | -1.6   |
| 91500 22                       | 63          | 495552      | 2.98 | 13.36            | 2.8             | 1.8378          | 5.2     | 0.17815     | 4.4             | 0.839   | 1056.8          | 42.5    | 1059.1           | 34      | 1063.7 | 57      | 0.6    |
| 91500 23                       | 50          | 52834       | 3.13 | 13.44            | 2.9             | 1.8341          | 4.8     | 0.17889     | 3.8             | 0.798   | 1060.9          | 37.2    | 1057.7           | 31      | 1051.2 | 58      | -0.9   |
| 91500 24                       | 50          | 175805      | 3.27 | 13.57            | 3.1             | 1.8075          | 5.5     | 0.17793     | 4.6             | 0.83    | 1055.7          | 44.6    | 1048.2           | 36      | 1032.6 | 62.2    | -2.2   |
| 91500 25                       | 69          | 64128       | 2.86 | 13.52            | 2.1             | 1.8272          | 3       | 0.17926     | 2.2             | 0.736   | 1062.9          | 22      | 1055.3           | 20      | 1039.5 | 41.7    | -2.3   |
| 91500 26                       | 75          | 312938      | 2.86 | 13.52            | 2.2             | 1.8254          | 4.8     | 0.1791      | 4.2             | 0.883   | 1062            | 41.2    | 1054.6           | 31      | 1039.3 | 45.2    | -2.2   |
| 91500 27                       | 49          | 29356       | 3.07 | 13.7             | 3.7             | 1.8016          | 6       | 0.17904     | 4.8             | 0.787   | 1061.7          | 46.5    | 1046             | 39      | 1013.4 | 75.4    | -4.8   |
| 91500 28                       | 56          | 157634      | 3.02 | 13.55            | 2.4             | 1.8049          | 4.1     | 0.17742     | 3.3             | 0.81    | 1052.9          | 31.9    | 1047.2           | 27      | 1035.4 | 48.1    | -1.7   |
| 91500 29                       | 59          | 81428       | 3    | 13.57            | 2.7             | 1.7999          | 4.2     | 0.17728     | 3.2             | 0.774   | 1052.1          | 31.5    | 1045.4           | 27      | 1031.6 | 53.8    | -2.0   |
| 91500 3                        | 51          | 110996      | 3.18 | 13.54            | 3.2             | 1.8003          | 4.7     | 0.17684     | 3.4             | 0.724   | 1049.7          | 33      | 1045.6           | 31      | 1036.9 | 65.6    | -1.2   |
| 91500 30                       | 50          | 111474      | 3.2  | 13.1             | 2.4             | 1.8324          | 4.6     | 0.17418     | 3.9             | 0.85    | 1035.1          | 37.6    | 1057.1           | 30      | 1103   | 48.7    | 6.2    |
| 91500 4                        | 85          | 36613       | 2.95 | 13.45            | 2.3             | 1.7723          | 3.7     | 0.1729      | 2.9             | 0.793   | 1028.1          | 27.9    | 1035.4           | 24      | 1050.9 | 45.5    | 2.2    |
| 91500 5                        | 50          | 76415       | 3.33 | 13.54            | 2.2             | 1.7997          | 4       | 0.17684     | 3.4             | 0.841   | 1049.7          | 32.5    | 1045.3           | 26      | 1036.2 | 43.8    | -1.3   |
| 91500 6                        | 52          | 26391       | 3.26 | 13.55            | 2.7             | 1.783           | 4.8     | 0.17523     | 4               | 0.831   | 1040.9          | 38.7    | 1039.3           | 32      | 1035.9 | 54.5    | -0.5   |
| 91500 7                        | 64          | 118619      | 2.98 | 13.3             | 2.3             | 1.8132          | 4.6     | 0.17495     | 3.9             | 0.86    | 1039.3          | 37.8    | 1050.2           | 30      | 1073   | 46.9    | 3.1    |
| 91500 8                        | 78          | 2036753     | 2.97 | 13.44            | 3               | 1.7733          | 4.6     | 0.17293     | 3.5             | 0.763   | 1028.2          | 33.2    | 1035.7           | 30      | 1051.7 | 59.7    | 2.2    |
| 91500 9                        | 66          | 379323      | 2.96 | 13.61            | 2.8             | 1.7952          | 4.4     | 0.17731     | 3.4             | 0.77    | 1052.3          | 32.7    | 1043.7           | 29      | 1025.8 | 56.4    | -2.6   |
| 91500 CA Run 1                 |             |             |      |                  |                 |                 |         |             |                 |         |                 |         |                  |         |        |         |        |
| 91500-1                        | 111         | 7828        | 2.76 | 13.519           | 2.1             | 1.734           | 3.8     | 0.17010     | 3.2             | 0.837   | 1012.7          | 29.6    | 1021.3           | 24.3    | 1039.7 | 41.8    | 2.6    |
| 91500-4                        | 118         | 12666       | 2.78 | 13.318           | 3.2             | 1.724           | 6.1     | 0.16660     | 5.1             | 0.845   | 993.4           | 47.1    | 1017.5           | 38.9    | 1069.9 | 65.1    | 7.2    |
| 91500-5                        | 102         | 6638        | 2.84 | 13.671           | 3.2             | 1.715           | 4.5     | 0.17010     | 3.3             | 0.716   | 1012.6          | 30.5    | 1014.1           | 29.2    | 1017.2 | 64.3    | 0.4    |
| 91500-6                        | 93          | 34450       | 2.70 | 13.329           | 3.0             | 1.481           | 3.9     | 0.14321     | 2.6             | 0.652   | 862.8           | 20.7    | 922.5            | 23.9    | 1068.2 | 60.0    | 19.2   |
| 91500-7                        | 118         | 14397       | 2.73 | 13.441           | 2.4             | 1.728           | 4.7     | 0.16855     | 4.0             | 0.855   | 1004.1          | 37.3    | 1019.1           | 30.2    | 1051.5 | 49.1    | 4.5    |
| 91500-8                        | 112         | 25835       | 2.59 | 13.605           | 2.7             | 1.783           | 3.3     | 0.17597     | 1.9             | 0.565   | 1044.9          | 18.1    | 1039.1           | 21.6    | 1027.0 | 55.4    | -1.7   |
| 91500-10                       | 107         | 62285       | 2.75 | 13.710           | 2.1             | 1.747           | 3.9     | 0.17379     | 3.3             | 0.840   | 1033.0          | 31.3    | 1026.1           | 25.2    | 1011.4 | 42.8    | -2.1   |
| 91500-11                       | 105         | 13338       | 2.75 | 13.774           | 7.2             | 1.748           | 11.3    | 0.17468     | 8.7             | 0.768   | 1037.8          | 83.2    | 1026.3           | 73.1    | 1001.9 | 147.3   | -3.6   |
| 91500-14                       | 117         | 22529       | 2.74 | 13.542           | 2.2             | 1.735           | 3.4     | 0.17050     | 2.6             | 0.756   | 1014.9          | 24.2    | 1021.7           | 22.0    | 1036.4 | 45.1    | 2.1    |
| 91500-15                       | 99          | 97207       | 2.83 | 13.487           | 3.6             | 1.745           | 5.3     | 0.17073     | 3.9             | 0.728   | 1016.2          | 36.2    | 1025.2           | 34.2    | 1044.5 | 73.3    | 2.7    |
| 91500 CA Run 1 (discordant)    |             |             |      |                  |                 |                 |         |             |                 |         |                 |         |                  |         |        |         |        |
| 91500-2                        | 106         | 5351        | 2.72 | 14.917           | 8.1             | 1.686           | 25.0    | 0.18246     | 23.6            | 0.946   | 1080.4          | 235.3   | 1003.1           | ###     | 837.9  | 168.2   | -28.9  |
| 91500-3                        | 96          | 3834        | 2.65 | 14.106           | 2.3             | 1.679           | 3.4     | 0.17184     | 2.5             | 0.728   | 1022.2          | 23.6    | 1000.6           | 21.8    | 953.4  | 48.0    | -7.2   |
| 91500-9                        | 126         | 4448        | 2.62 | 14.073           | 1.9             | 1.669           | 3.0     | 0.17040     | 2.3             | 0.760   | 1014.3          | 21.1    | 996.8            | 18.8    | 958.3  | 39.3    | -5.9   |
| 91500-12                       | 95          | 3186        | 2.69 | 20.118           | 3.9             | 0.954           | 5.2     | 0.13929     | 3.5             | 0.671   | 840.6           | 27.5    | 680.3            | 25.8    | 180.2  | 90.0    | -366.5 |
| 91500-13                       | 115         | 90638       | 2.90 | 11.984           | 2.6             | 1.875           | 7.0     | 0.16306     | 6.5             | 0.930   | 973.8           | 58.5    | 1072.4           | 46.1    | 1278.8 | 50.0    | 23.9   |
| 91500 CA Run 2                 |             |             |      |                  |                 |                 |         |             |                 |         |                 |         |                  |         |        |         |        |
| 91500 1                        | 116         | 40413       | 2.66 | 13.36            | 3.1             | 1.854           | 5.1     | 0.17969     | 4               | 0.782   | 1065.3          | 38.8    | 1064.8           | 33      | 1063.9 | 63.3    | -0.1   |
| 91500 11                       | 113         | 72735       | 2.55 | 13.54            | 2.1             | 1.8412          | 4.4     | 0.18088     | 3.9             | 0.88    | 1071.8          | 38.3    | 1063             |         |        |         |        |

|                                    |     |         |      |        |     |        |     |         |     |       |        |      |        |      |        |      |      |
|------------------------------------|-----|---------|------|--------|-----|--------|-----|---------|-----|-------|--------|------|--------|------|--------|------|------|
| 91500 21                           | 99  | 120776  | 2.54 | 13.49  | 2.7 | 1.8585 | 4.6 | 0.18191 | 3.8 | 0.816 | 1077.4 | 37.4 | 1066.4 | 31   | 1044.1 | 53.9 | -3.2 |
| 91500 22                           | 86  | 663732  | 2.75 | 13.1   | 3.8 | 1.8774 | 5.6 | 0.17844 | 4.1 | 0.73  | 1058.4 | 39.7 | 1073.2 | 37   | 1103.2 | 76.2 | 4.1  |
| 91500 23                           | 109 | 1487161 | 2.61 | 13.6   | 2.6 | 1.8144 | 6   | 0.17903 | 5.4 | 0.9   | 1061.7 | 52.4 | 1050.7 | 39   | 1027.8 | 52.6 | -3.3 |
| 91500 24                           | 96  | 124311  | 2.61 | 13.38  | 3   | 1.8858 | 5   | 0.18304 | 4   | 0.796 | 1083.6 | 39.8 | 1076.1 | 33   | 1061   | 61   | -2.1 |
| 91500 25                           | 112 | 246803  | 2.68 | 13.32  | 2.4 | 1.8478 | 4.4 | 0.17856 | 3.7 | 0.834 | 1059.1 | 35.9 | 1062.7 | 29   | 1069.9 | 48.8 | 1.0  |
| 91500 26                           | 128 | 179489  | 2.55 | 13.47  | 2.7 | 1.8566 | 4.3 | 0.18149 | 3.3 | 0.78  | 1075.1 | 32.9 | 1065.8 | 28   | 1046.8 | 53.7 | -2.7 |
| 91500 27                           | 104 | 74513   | 2.67 | 13.64  | 2.9 | 1.8268 | 3.8 | 0.18075 | 2.5 | 0.663 | 1071.1 | 25.1 | 1055.1 | 25   | 1022.2 | 58.2 | -4.8 |
| 91500 28                           | 123 | 54210   | 2.63 | 13.26  | 3.2 | 1.8179 | 5   | 0.17487 | 3.8 | 0.77  | 1038.9 | 36.6 | 1051.9 | 32   | 1079.2 | 63.3 | 3.7  |
| 91500 29                           | 117 | 299682  | 2.54 | 13.31  | 3.3 | 1.8572 | 4.7 | 0.17937 | 3.4 | 0.708 | 1063.5 | 32.9 | 1066   | 31   | 1071.1 | 67.2 | 0.7  |
| 91500 3                            | 95  | 109347  | 2.79 | 13.34  | 2.4 | 1.8536 | 4.2 | 0.17943 | 3.4 | 0.821 | 1063.9 | 33.6 | 1064.7 | 28   | 1066.4 | 47.8 | 0.2  |
| 91500 30                           | 101 | 48440   | 2.62 | 13.31  | 3   | 1.8578 | 4.8 | 0.1794  | 3.7 | 0.782 | 1063.7 | 36.6 | 1066.2 | 32   | 1071.3 | 59.7 | 0.7  |
| 91500 4                            | 98  | 3027465 | 2.6  | 13.37  | 2.2 | 1.8863 | 4   | 0.18305 | 3.3 | 0.83  | 1083.6 | 33.3 | 1076.3 | 27   | 1061.4 | 45.1 | -2.1 |
| 91500 5                            | 122 | 87402   | 2.71 | 13.39  | 3.1 | 1.8043 | 5.1 | 0.17529 | 4   | 0.796 | 1041.2 | 38.7 | 1047   | 33   | 1059.2 | 61.6 | 1.7  |
| 91500 6                            | 123 | 71895   | 2.65 | 13.31  | 2.5 | 1.8223 | 4.4 | 0.17602 | 3.7 | 0.825 | 1045.2 | 35.3 | 1053.5 | 29   | 1070.7 | 50.3 | 2.4  |
| 91500 7                            | 106 | 407956  | 2.61 | 13.57  | 3.1 | 1.8209 | 4.9 | 0.1793  | 3.8 | 0.778 | 1063.2 | 37.1 | 1053   | 32   | 1031.9 | 61.8 | -3.0 |
| 91500 8                            | 102 | 38420   | 2.59 | 13.45  | 1.9 | 1.8531 | 4.3 | 0.1808  | 3.9 | 0.899 | 1071.3 | 38   | 1064.5 | 28   | 1050.7 | 37.8 | -2.0 |
| 91500 9                            | 112 | 95071   | 2.65 | 13.61  | 2.6 | 1.8379 | 5.1 | 0.18145 | 4.4 | 0.863 | 1074.9 | 43.4 | 1059.1 | 33   | 1026.7 | 52   | -4.7 |
| <b>91500 CA Run 2 (discordant)</b> |     |         |      |        |     |        |     |         |     |       |        |      |        |      |        |      |      |
| 91500 10                           | 101 | 30656   | 2.55 | 13.712 | 3.5 | 1.8289 | 5.4 | 0.18196 | 4.1 | 0.762 | 1077.7 | 40.7 | 1055.9 | 35.3 | 1011   | 70.6 | -6.6 |
| 91500 14                           | 88  | 22736   | 2.75 | 13.717 | 3.3 | 1.87   | 5   | 0.18612 | 3.7 | 0.747 | 1100.3 | 37.7 | 1070.5 | 33   | 1010.3 | 67.3 | -8.9 |
