# Supplementary material for: Increased accuracy and precision in igneous and detrital zircon geochronology using CA-LA-ICPMS
Source: Copernicus journal article supplement (doi:10.5194/gchron-2023-20), 2023-08-25
Supplement: Supplementary file 2 [file gchron-2023-20-supplement.zip]

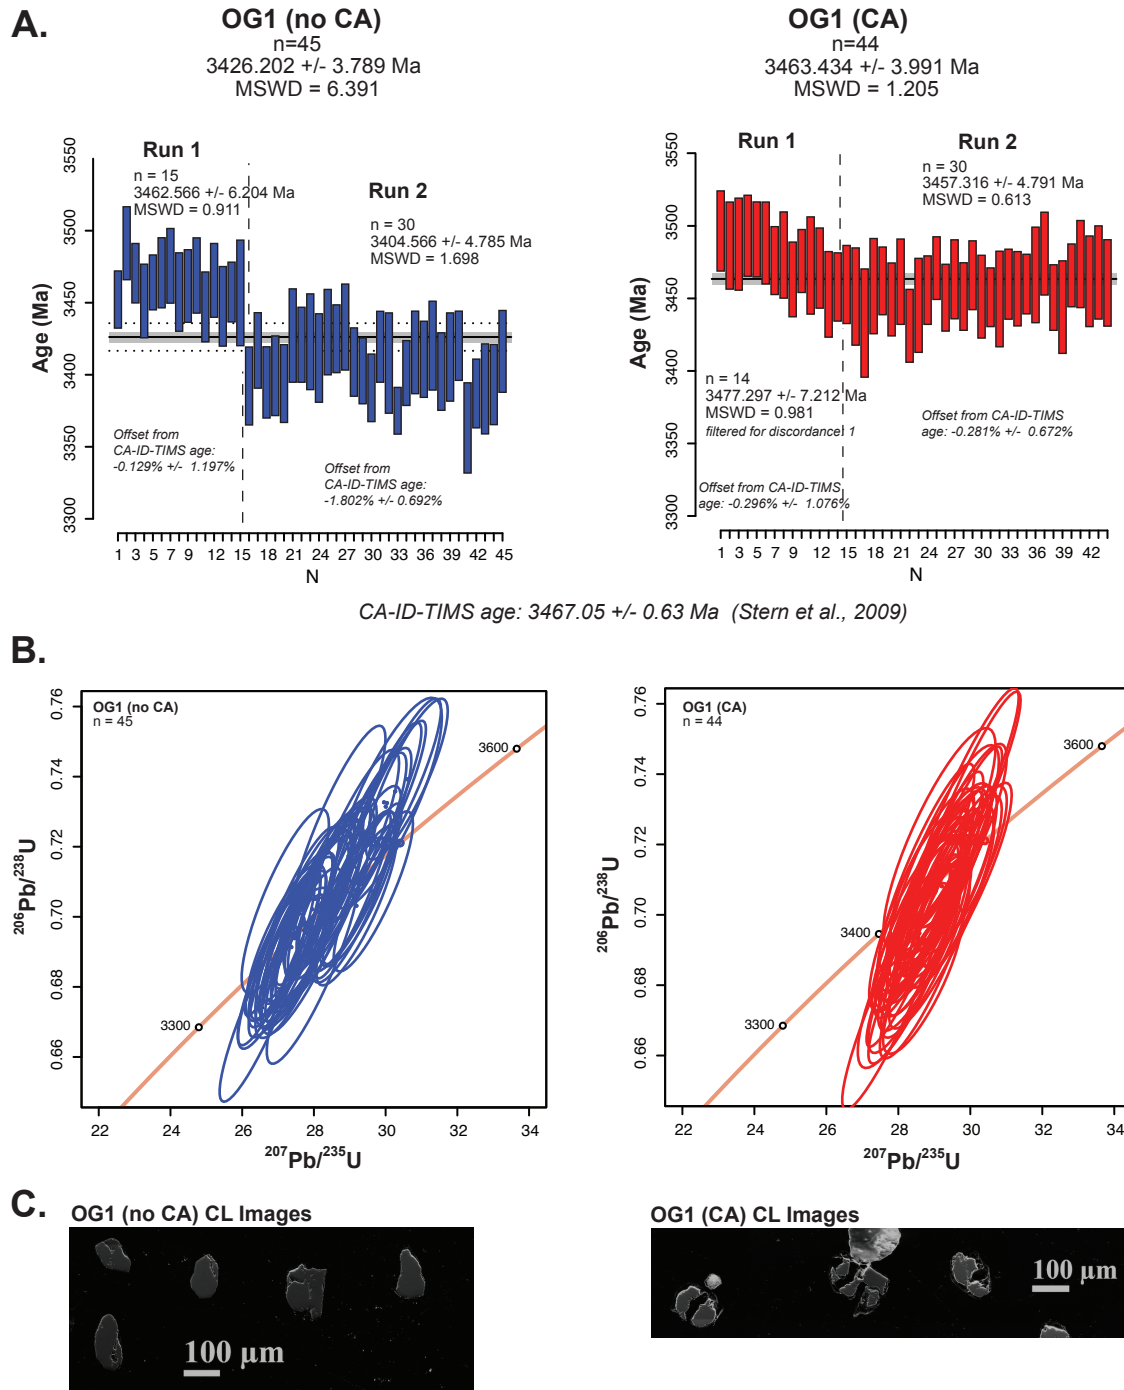

**Figure S13. A.** Rank order plots show weighted mean calculations and the deviation from the CA-ID-TIMS age of individual runs for treated and untreated aliquots of reference material OG1. **B.** Concordia diagram of all U-Pb analyses for treated and untreated aliquots of OG1. **C.** Example CL images of treated and untreated aliquots of OG1.
