# Supplementary material for: Increased accuracy and precision in igneous and detrital zircon geochronology using CA-LA-ICPMS
Source: Copernicus journal article supplement (doi:10.5194/gchron-2023-20), 2023-08-25
Supplement: Supplementary file 3 [file gchron-2023-20-supplement.zip]

### **MIGU-02 U-Pb zircon geochronology data (CA-ID-TIMS and (CA)LA-ICPMS)**

This section includes raw data for concordant and discordant U-Pb zircon geochronology for igneous sample MIGU-02. Table S14 contains all LA-ICPMS and CA-LA-ICPMS data and Table S15 contains all CA-ID-TIMS data.
