# Supplementary material for: Increased accuracy and precision in igneous and detrital zircon geochronology using CA-LA-ICPMS
Source: Copernicus journal article supplement (doi:10.5194/gchron-2023-20), 2023-08-25
Supplement: Supplementary file 4 [file gchron-2023-20-supplement.zip]

TABLE S8: SLF LA-ICPMS U-Pb ZIRCON GEOCHRONOLOGY

| Composition     |         |             |      |             |        |            |        |            |        | Ages        |            |         |            |         |             |         |         |
|-----------------|---------|-------------|------|-------------|--------|------------|--------|------------|--------|-------------|------------|---------|------------|---------|-------------|---------|---------|
| Zircon #        | U (ppm) | 206Pb/204Pb | U/Th | 206Pb/207Pb | 2σ (%) | 207Pb/235U | 2σ (%) | 206Pb/238U | 2σ (%) | Error Corr. | 206Pb/238U | 2σ (Ma) | 207Pb/235U | 2σ (Ma) | 206Pb/207Pb | 2σ (Ma) | % Disc. |
| SLF no CA Run 1 |         |             |      |             |        |            |        |            |        |             |            |         |            |         |             |         |         |
| SLF-1           | 611     | 38849       | 5.42 | 16.778      | 1.5    | 0.7420     | 3.4    | 0.09034    | 3.1    | 0.897       | 557.5      | 16.3    | 563.6      | 14.8    | 588.2       | 32.7    | 5.2     |
| SLF-10          | 663     | 36208       | 5.34 | 17.240      | 1.8    | 0.7455     | 2.8    | 0.09326    | 2.2    | 0.782       | 574.8      | 12.1    | 565.6      | 12.2    | 529.0       | 38.5    | -8.6    |
| SLF-11          | 492     | 53756       | 5.75 | 17.079      | 1.8    | 0.7564     | 3.0    | 0.09373    | 2.4    | 0.805       | 577.5      | 13.1    | 571.9      | 12.9    | 549.6       | 38.2    | -5.1    |
| SLF-12          | 619     | 18611       | 5.53 | 17.891      | 4.5    | 0.7242     | 6.9    | 0.09401    | 5.2    | 0.756       | 579.2      | 29.1    | 553.1      | 29.6    | 447.2       | 101.0   | -29.5   |
| SLF-13          | 664     | 826559      | 5.63 | 16.722      | 1.4    | 0.7341     | 2.7    | 0.08907    | 2.3    | 0.858       | 550.1      | 12.0    | 559.0      | 11.4    | 595.4       | 29.6    | 7.6     |
| SLF-14          | 662     | 24288       | 5.52 | 17.077      | 1.8    | 0.7371     | 3.3    | 0.09134    | 2.8    | 0.842       | 563.4      | 15.1    | 560.7      | 14.4    | 549.8       | 39.2    | -2.5    |
| SLF-15          | 657     | 44438       | 5.65 | 17.097      | 1.8    | 0.7272     | 3.2    | 0.09021    | 2.6    | 0.821       | 556.8      | 13.9    | 554.9      | 13.6    | 547.3       | 39.7    | -1.7    |
| SLF-2           | 729     | 32676       | 5.42 | 16.604      | 1.8    | 0.7643     | 3.0    | 0.09208    | 2.4    | 0.801       | 567.8      | 12.9    | 576.5      | 13.0    | 610.7       | 38.2    | 7.0     |
| SLF-3           | 749     | 18647       | 5.71 | 17.138      | 1.4    | 0.7216     | 3.0    | 0.08974    | 2.7    | 0.889       | 554.0      | 14.1    | 551.6      | 12.7    | 542.0       | 29.8    | -2.2    |
| SLF-4           | 720     | 1214081     | 5.55 | 17.025      | 1.4    | 0.7428     | 2.8    | 0.09175    | 2.4    | 0.866       | 565.9      | 12.9    | 564.0      | 11.9    | 556.5       | 30.1    | -1.7    |
| SLF-5           | 447     | 37822       | 6.15 | 17.069      | 1.4    | 0.7512     | 2.8    | 0.09304    | 2.4    | 0.858       | 573.5      | 13.0    | 568.9      | 12.1    | 550.8       | 31.1    | -4.1    |
| SLF-6           | 706     | 38805       | 5.55 | 17.004      | 2.5    | 0.7290     | 3.2    | 0.08995    | 2.0    | 0.636       | 555.2      | 10.9    | 556.0      | 13.8    | 559.1       | 54.0    | 0.7     |
| SLF-7           | 769     | 34045       | 5.74 | 17.014      | 1.5    | 0.7157     | 2.9    | 0.08836    | 2.4    | 0.840       | 545.8      | 12.6    | 548.1      | 12.1    | 557.9       | 33.8    | 2.2     |
| SLF-8           | 683     | 272125      | 5.58 | 16.923      | 1.3    | 0.7397     | 2.8    | 0.09082    | 2.5    | 0.878       | 560.4      | 13.3    | 562.2      | 12.2    | 569.5       | 29.4    | 1.6     |
| SLF-9           | 621     | 37397       | 5.53 | 17.322      | 1.8    | 0.7259     | 3.5    | 0.09123    | 3.0    | 0.857       | 562.8      | 16.1    | 554.1      | 14.9    | 518.6       | 39.3    | -8.5    |
| SLF no CA Run 2 |         |             |      |             |        |            |        |            |        |             |            |         |            |         |             |         |         |
| SLF 1           | 653     | 951426      | 6.06 | 16.941      | 2.6    | 0.7405     | 4      | 0.09102    | 3.1    | 0.771       | 561.6      | 16.7    | 562.7      | 17.4    | 567.2       | 55.7    | 1.0     |
| SLF 10          | 624     | 278758      | 6.19 | 16.977      | 2.2    | 0.7458     | 3.2    | 0.09187    | 2.3    | 0.725       | 566.6      | 12.5    | 565.8      | 13.8    | 562.5       | 47.9    | -0.7    |
| SLF 11          | 619     | 390017      | 5.89 | 16.878      | 1.6    | 0.7403     | 2.9    | 0.09066    | 2.5    | 0.84        | 559.4      | 13.2    | 562.6      | 12.6    | 575.3       | 34.6    | 2.8     |
| SLF 12          | 607     | 320847      | 6.27 | 17.016      | 2.3    | 0.7381     | 3.4    | 0.09113    | 2.6    | 0.749       | 562.2      | 13.8    | 561.3      | 14.7    | 557.5       | 49.4    | -0.8    |
| SLF 13          | 576     | 78280       | 6.07 | 17.008      | 2.1    | 0.7351     | 3.5    | 0.09072    | 2.8    | 0.795       | 559.8      | 14.8    | 559.6      | 15      | 558.6       | 46      | -0.2    |
| SLF 14          | 583     | 121680      | 6.18 | 17.063      | 2.5    | 0.7334     | 3.8    | 0.0908     | 2.9    | 0.766       | 560.3      | 15.7    | 558.6      | 16.4    | 551.6       | 53.6    | -1.6    |
| SLF 15          | 586     | 1945445     | 6.07 | 17.041      | 2.2    | 0.7484     | 4      | 0.09253    | 3.4    | 0.846       | 570.5      | 18.7    | 567.3      | 17.6    | 554.3       | 47.1    | -2.9    |
| SLF 16          | 482     | 265069      | 6.31 | 16.972      | 2.4    | 0.7333     | 3.3    | 0.09031    | 2.3    | 0.697       | 557.4      | 12.3    | 558.5      | 14.2    | 563.2       | 51.8    | 1.0     |
| SLF 17          | 570     | 368921      | 6.24 | 17.104      | 2.1    | 0.7335     | 3.1    | 0.09104    | 2.3    | 0.745       | 561.7      | 12.6    | 558.6      | 13.5    | 546.3       | 45.8    | -2.8    |
| SLF 18          | 588     | 1069555     | 5.93 | 16.97       | 1.7    | 0.7401     | 3.1    | 0.09113    | 2.6    | 0.842       | 562.2      | 14.1    | 562.4      | 13.5    | 563.5       | 36.6    | 0.2     |
| SLF 19          | 600     | 6227305     | 5.83 | 17.126      | 2.1    | 0.7383     | 3.1    | 0.09174    | 2.4    | 0.75        | 565.8      | 12.8    | 561.4      | 13.5    | 543.4       | 45.5    | -4.1    |
| SLF 2           | 538     | 338080      | 5.83 | 16.963      | 1.7    | 0.7329     | 2.5    | 0.09021    | 1.8    | 0.74        | 556.8      | 9.7     | 558.3      | 10.6    | 564.3       | 36      | 1.3     |
| SLF 20          | 623     | 146763      | 6.18 | 17.062      | 1.5    | 0.7402     | 2.6    | 0.09164    | 2.1    | 0.812       | 565.2      | 11.4    | 562.5      | 11.2    | 551.6       | 33.2    | -2.5    |
| SLF 21          | 603     | 637360      | 6.18 | 16.924      | 2.2    | 0.7377     | 3.1    | 0.09059    | 2.2    | 0.714       | 559        | 12      | 561.1      | 13.5    | 569.3       | 47.8    | 1.8     |
| SLF 22          | 581     | 415108      | 6.14 | 17.018      | 2.4    | 0.7345     | 3.7    | 0.09069    | 2.8    | 0.767       | 559.6      | 15.1    | 559.2      | 15.8    | 557.3       | 51.4    | -0.4    |
| SLF 23          | 571     | 1005130     | 6.14 | 17.075      | 2.5    | 0.7386     | 3.2    | 0.09151    | 2      | 0.622       | 564.5      | 10.7    | 561.6      | 13.8    | 550         | 54.7    | -2.6    |
| SLF 24          | 619     | 223195      | 6.04 | 16.849      | 2.3    | 0.7453     | 3.5    | 0.09111    | 2.6    | 0.754       | 562.1      | 14.1    | 565.5      | 15.1    | 579         | 49.8    | 2.9     |
| SLF 25          | 541     | 510381      | 5.98 | 16.861      | 2.2    | 0.7475     | 2.8    | 0.09145    | 1.7    | 0.622       | 564.1      | 9.4     | 566.8      | 12.1    | 577.5       | 47.5    | 2.3     |
| SLF 26          | 586     | 1686134     | 6.19 | 17.106      | 1.7    | 0.7325     | 2.9    | 0.09092    | 2.4    | 0.811       | 561        | 12.8    | 558        | 12.6    | 546         | 37.6    | -2.7    |
| SLF 27          | 585     | 184158      | 5.96 | 17.091      | 1.8    | 0.7328     | 3      | 0.09088    | 2.4    | 0.804       | 560.7      | 13      | 558.2      | 12.9    | 548         | 39.1    | -2.3    |
| SLF 28          | 643     | 247904      | 6.3  | 16.932      | 1.8    | 0.74       | 3.1    | 0.09091    | 2.5    | 0.81        | 560.9      | 13.5    | 562.4      | 13.4    | 568.4       | 39.4    | 1.3     |
| SLF 29          | 640     | 302715      | 5.95 | 17.053      | 2.3    | 0.734      | 3.4    | 0.09082    | 2.5    | 0.744       | 560.4      | 13.6    | 558.9      | 14.7    | 552.8       | 49.7    | -1.4    |
| SLF 3           | 612     | 126413      | 6.13 | 17.152      | 2.2    | 0.7206     | 3.5    | 0.08969    | 2.8    | 0.785       | 553.7      | 14.7    | 551        | 15      | 540.1       | 47.8    | -2.5    |
| SLF 30          | 597     | 1137341     | 6.11 | 17.046      | 1.9    | 0.7362     | 3.6    | 0.09106    | 3      | 0.848       | 561.8      | 16.2    | 560.2      | 15.3    | 553.6       | 41.1    | -1.5    |
| SLF 4           | 626     | 349860      | 6.12 | 17.133      | 2.3    | 0.7344     | 3.6    | 0.0913     | 2.7    | 0.772       | 563.2      | 14.8    | 559.1      | 15.3    | 542.6       | 49.4    | -3.8    |
| SLF 5           | 700     | 218098      | 6.02 | 16.872      | 2      | 0.7462     | 3.2    | 0.09135    | 2.4    | 0.77        | 563.5      | 13.2    | 566        | 13.8    | 576         | 44.1    | 2.2     |
| SLF 6           | 536     | 16322853    | 5.91 | 17.074      | 2.2    | 0.7347     | 3.4    | 0.09102    | 2.5    | 0.752       | 561.6      | 13.6    | 559.3      | 14.4    | 550.1       | 48.2    | -2.1    |
| SLF 7           | 602     | 1481454     | 6.14 | 16.922      | 2.4    | 0.7417     | 3.2    | 0.09107    | 2.1    | 0.657       | 561.9      | 11.5    | 563.4      | 14      | 569.6       | 53.2    | 1.4     |
| SLF 8           | 489     | 250616      | 6.35 | 17.058      | 2      | 0.728      | 3.4    | 0.0901     | 2.7    | 0.805       | 556.1      | 14.4    | 555.4      | 14.4    | 552.2       | 43.4    | -0.7    |
| SLF 9           | 649     | 688740      | 6.05 | 17.075      | 1.9    | 0.7396     | 3      | 0.09164    | 2.3    | 0.766       | 565.2      | 12.3    | 562.2      | 12.8    | 550         | 41.4    | -2.8    |
| Composition     |         |             |      |             |        |            |        |            |        | Ages        |            |         |            |         |             |         |         |
| Zircon #        | U (ppm) | 206Pb/204Pb | U/Th | 206Pb/207Pb | 2σ (%) | 207Pb/235U | 2σ (%) | 206Pb/238U | 2σ (%) | Error Corr. | 206Pb/238U | 2σ (Ma) | 207Pb/235U | 2σ (Ma) | 206Pb/207Pb | 2σ (Ma) | % Disc. |
| SLF CA Run 1    |         |             |      |             |        |            |        |            |        |             |            |         |            |         |             |         |         |
| SLM-1           | 1080    | 170477      | 5.50 | 17.003      | 2.3    | 0.7299     | 3.8    | 0.09005    | 3.0    | 0.793       | 555.8      | 15.9    | 556.5      | 16.1    | 559.2       | 50.0    | 0.6     |
| SLM-3           | 945     | 38391       | 5.08 | 17.253      | 1.6    | 0.7217     | 3.5    | 0.09034    | 3.1    | 0.885       | 557.6      | 16.7    | 551.7      | 15.1    | 527.3       | 36.1    | -5.7    |
| SLM-4           | 995     | 37284       | 5.30 | 16.879      | 1.8    | 0.7551     | 3.2    | 0.09247    | 2.7    | 0.838       | 570.1      | 14.7    | 571.2      | 14.0    | 575.2       | 38.1    | 0.9     |
| SLM-5           | 212     | 6968        | 4.92 | 17.427      | 2.8    | 0.7045     | 3.8    | 0.08909    | 2.5    | 0.667       | 550.1      | 13.3    | 541.5      | 15.9    | 505.4       | 62.1    | -8.9    |
| SLM-6           | 1024    | 8237        | 5.54 | 17.287      | 1.7    | 0.7113     | 3.3    | 0.08922    | 2.8    | 0.863       | 550.9      | 15.0    | 545.5      | 13.9    | 523.0       | 36.4    | -5.3    |
| SLM-8           | 943     | 33885       | 5.44 | 16.858      | 2.1    | 0.7397     | 3.3    | 0.09048    | 2.5    | 0.765       | 558.4      | 13.5    | 562.2      | 14.2    | 577.8       | 46.0    | 3.4     |
| SLM-7           | 1026    | 38414       | 5.06 | 16.913      | 2.0    | 0.7395     | 3.1    | 0.09076    | 2.3    | 0.757       | 560.0      | 12.6    | 562.1      | 13.4    | 570.7       | 44.0    | 1.9     |
| SLM-10          | 726     | 109262      | 5.23 | 16.873      | 2.8    | 0.7263     | 4.2    | 0.08892    | 3.1    | 0.744       | 549.2      | 16.3    | 554.4      | 17.8    | 576.0       | 60.5    | 4.7     |
| SLM-9           | 387     | 47428       | 5.75 | 16.719      | 2.3    | 0.7605     | 3.9    | 0.09226    | 3.2    | 0.811       | 568.9      | 17.3    | 574.3      | 17.2    | 595.8       | 49.7    | 4.5     |
| SLM-11          | 1034    | 38532       | 5.21 | 17.403      | 2.0    | 0.7355     | 3.5    | 0.09288    | 2.9    | 0.827       | 572.5      | 15.8    | 559.8      | 15.0    | 508.3       | 43.1    | -12.6   |
| SLM-12          | 1057    | 37831       | 5.25 | 17.019      | 2.1    | 0.7348     | 3.0    | 0.09074    | 2.0    | 0.691       | 559.9      | 11.0    | 559.4      | 12.8    | 557.2       | 46.8    | -0.5    |
| SLM-13          | 966     | 16653       | 5.25 | 17.079      | 2.1    | 0.7446     | 3.2    | 0.09227    | 2.4    | 0.760       | 568.9      | 13.3    | 565.1      | 13.9    | 549.6       | 45.5    | -3.5    |
| SLM-14          | 907     | 3859958     | 5.12 | 16.646      | 2.0    | 0.7454     | 3.6    | 0.09003    | 3.0    | 0.833       | 555.7      | 16.1    | 565.5      | 15.7    | 605.3       | 43.4    | 8.2     |
| SLM-2           | 969     | 56602       | 5.42 | 17.844      | 4.5    | 0.7276     | 8.9    | 0.09421    | 7.7    | 0.862       | 580.4      | 42.6    | 555.2      | 38.1    | 453.0       | 100.2   | -28.1   |
| SLM-15          |         |             |      |             |        |            |        |            |        |             |            |         |            |         |             |         |         |

|        |      |          |      |        |     |        |     |         |     |       |       |      |       |      |       |      |      |
|--------|------|----------|------|--------|-----|--------|-----|---------|-----|-------|-------|------|-------|------|-------|------|------|
| SLF 20 | 1017 | 5946153  | 5.23 | 17.031 | 2   | 0.7359 | 3   | 0.09094 | 2.2 | 0.741 | 561.1 | 12   | 560   | 13   | 555.6 | 44.1 | -1.0 |
| SLF 21 | 1092 | 531644   | 5.15 | 16.999 | 2.1 | 0.724  | 2.8 | 0.0893  | 1.8 | 0.658 | 551.4 | 9.8  | 553   | 12   | 559.8 | 46.1 | 1.5  |
| SLF 22 | 1230 | 372277   | 5.18 | 16.849 | 1.6 | 0.7311 | 2.5 | 0.08938 | 1.9 | 0.766 | 551.9 | 10.1 | 557.2 | 10.7 | 579   | 34.8 | 4.7  |
| SLF 23 | 1073 | 17192905 | 4.92 | 17.004 | 1.9 | 0.7237 | 2.6 | 0.08929 | 1.9 | 0.711 | 551.3 | 9.9  | 552.8 | 11.2 | 559   | 40.4 | 1.4  |
| SLF 24 | 1084 | 107781   | 5.37 | 17.061 | 2.5 | 0.726  | 3.2 | 0.08988 | 2   | 0.62  | 554.8 | 10.6 | 554.2 | 13.8 | 551.8 | 55.3 | -0.5 |
| SLF 25 | 1089 | 443708   | 5.24 | 16.902 | 2   | 0.7351 | 3.1 | 0.09015 | 2.4 | 0.767 | 556.4 | 12.8 | 559.5 | 13.4 | 572.1 | 43.6 | 2.7  |
| SLF 26 | 1102 | 332810   | 5.32 | 16.878 | 2.2 | 0.738  | 3.2 | 0.09038 | 2.4 | 0.735 | 557.8 | 12.7 | 561.2 | 14   | 575.2 | 47.9 | 3.0  |
| SLF 27 | 1090 | 290796   | 5.23 | 16.965 | 2.7 | 0.7356 | 3.2 | 0.09054 | 1.7 | 0.534 | 558.8 | 9    | 559.8 | 13.6 | 564.1 | 58.1 | 0.9  |
| SLF 28 | 1172 | 168079   | 5.11 | 17.111 | 2.3 | 0.7315 | 3.1 | 0.09082 | 2.1 | 0.671 | 560.4 | 11.2 | 557.4 | 13.3 | 545.4 | 50.3 | -2.8 |
| SLF 29 | 869  | 304201   | 5.28 | 17.069 | 2   | 0.7301 | 3.4 | 0.09043 | 2.8 | 0.817 | 558.1 | 14.9 | 556.6 | 14.6 | 550.7 | 42.8 | -1.3 |
| SLF 3  | 1092 | 229942   | 5.29 | 17.063 | 1.8 | 0.7437 | 2.6 | 0.09207 | 1.9 | 0.73  | 567.8 | 10.4 | 564.5 | 11.3 | 551.5 | 39.1 | -3.0 |
| SLF 30 | 1088 | 726344   | 4.97 | 17.125 | 1.7 | 0.747  | 2.6 | 0.09282 | 2   | 0.764 | 572.2 | 10.7 | 566.5 | 11.1 | 543.6 | 36.2 | -5.3 |
| SLF 4  | 1108 | 366780   | 5.16 | 17.165 | 2   | 0.7319 | 3.2 | 0.09116 | 2.5 | 0.779 | 562.4 | 13.3 | 557.7 | 13.6 | 538.4 | 43.5 | -4.5 |
| SLF 5  | 1080 | 213426   | 5.11 | 16.926 | 1.6 | 0.74   | 2.5 | 0.09089 | 1.9 | 0.76  | 560.8 | 10.2 | 562.4 | 10.8 | 569.2 | 35.2 | 1.5  |
| SLF 6  | 871  | 165674   | 5.27 | 17.093 | 1.7 | 0.7309 | 3   | 0.09065 | 2.5 | 0.825 | 559.4 | 13.5 | 557.1 | 13.1 | 547.7 | 37.6 | -2.1 |
| SLF 7  | 1171 | 19047346 | 5.22 | 16.922 | 1.6 | 0.7331 | 2.7 | 0.09001 | 2.1 | 0.801 | 555.6 | 11.3 | 558.4 | 11.4 | 569.7 | 34.7 | 2.5  |
| SLF 8  | 1046 | 204365   | 5.13 | 16.885 | 1.7 | 0.7463 | 2.8 | 0.09144 | 2.3 | 0.797 | 564   | 12.2 | 566.1 | 12.3 | 574.4 | 37.3 | 1.8  |
| SLF 9  | 1106 | 1899868  | 5.28 | 17.017 | 1.4 | 0.7351 | 2.3 | 0.09076 | 1.8 | 0.796 | 560   | 9.8  | 559.5 | 9.9  | 557.5 | 30.4 | -0.4 |
