# Supplementary material for: Increased accuracy and precision in igneous and detrital zircon geochronology using CA-LA-ICPMS
Source: Copernicus journal article supplement (doi:10.5194/gchron-2023-20), 2023-08-25
Supplement: Supplementary file 5 [file gchron-2023-20-supplement.zip]

TABLE S5: TEMORA 2 LA-ICPMS U-Pb ZIRCON GEOCHRONOLOGY

| Zircon #                          | Composition |             |      |             |        | Ages       |        |            |        |             |            |         |            |         |                  |       | % Disc. |
|-----------------------------------|-------------|-------------|------|-------------|--------|------------|--------|------------|--------|-------------|------------|---------|------------|---------|------------------|-------|---------|
|                                   | U (ppm)     | 206Pb/204Pb | U/Th | 206Pb/207Pb | 2σ (%) | 207Pb/235U | 2σ (%) | 206Pb/238U | 2σ (%) | Error Corr. | 206Pb/238U | 2σ (Ma) | 207Pb/235U | 2σ (Ma) | 206Pb/207Pb (Ma) |       |         |
| Temora 2 no CA Run 1              |             |             |      |             |        |            |        |            |        |             |            |         |            |         |                  |       |         |
| TEM-1                             | 88          | 308674      | 3.33 | 17.67       | 5.0    | 0.535      | 6.5    | 0.06864    | 4.2    | 0.644       | 427.9      | 17.4    | 435.3      | 23.0    | 474.2            | 110.2 | 9.8     |
| TEM-2                             | 1984        | 41775       | 1.46 | 18.01       | 2.5    | 0.520      | 3.6    | 0.06799    | 2.5    | 0.707       | 424.0      | 10.3    | 425.3      | 12.4    | 432.0            | 56.2  | 1.8     |
| TEM-3                             | 211         | 84894       | 3.91 | 18.38       | 3.2    | 0.507      | 4.4    | 0.06755    | 3.0    | 0.683       | 421.4      | 12.3    | 416.1      | 15.1    | 386.9            | 72.4  | -8.9    |
| TEM-4                             | 556         | 24198       | 2.89 | 17.60       | 4.8    | 0.540      | 5.3    | 0.06896    | 2.4    | 0.444       | 429.9      | 9.8     | 438.4      | 19.0    | 483.4            | 105.5 | 11.1    |
| TEM-5                             | 190         | 17194       | 1.67 | 18.46       | 2.8    | 0.518      | 4.0    | 0.06936    | 2.8    | 0.698       | 432.3      | 11.6    | 423.7      | 13.8    | 377.5            | 64.0  | -14.5   |
| TEM-6                             | 155         | 18099       | 4.57 | 17.92       | 3.1    | 0.533      | 4.3    | 0.06927    | 2.9    | 0.684       | 431.8      | 12.3    | 433.6      | 15.2    | 443.1            | 69.8  | 2.5     |
| TEM-7                             | 124         | 32424       | 3.44 | 17.64       | 3.8    | 0.523      | 5.1    | 0.06694    | 3.4    | 0.663       | 417.7      | 13.7    | 427.1      | 17.9    | 477.9            | 84.9  | 12.6    |
| TEM-8                             | 1333        | 55825       | 1.47 | 18.01       | 1.5    | 0.510      | 3.0    | 0.06663    | 2.6    | 0.869       | 415.8      | 10.5    | 418.3      | 10.3    | 431.8            | 33.1  | 3.7     |
| TEM-9                             | 365         | 122329      | 1.99 | 18.25       | 1.9    | 0.505      | 3.7    | 0.06681    | 3.2    | 0.861       | 416.9      | 12.9    | 414.9      | 12.6    | 403.5            | 42.2  | -3.3    |
| TEM-10                            | 379         | 131674      | 2.01 | 18.13       | 1.9    | 0.522      | 3.1    | 0.06870    | 2.5    | 0.797       | 428.3      | 10.3    | 426.6      | 10.8    | 417.0            | 42.0  | -2.7    |
| TEM-11                            | 200         | 9518        | 4.13 | 19.02       | 2.8    | 0.501      | 3.7    | 0.06915    | 2.4    | 0.651       | 431.0      | 10.2    | 412.4      | 12.7    | 309.7            | 64.7  | -39.2   |
| TEM-13                            | 283         | 5567        | 1.94 | 18.18       | 3.3    | 0.507      | 4.9    | 0.06686    | 3.6    | 0.736       | 417.2      | 14.5    | 416.3      | 16.7    | 411.2            | 74.1  | -1.5    |
| TEM-14                            | 460         | 141229      | 4.03 | 17.91       | 2.3    | 0.525      | 3.3    | 0.06823    | 2.3    | 0.708       | 425.5      | 9.6     | 428.6      | 11.6    | 445.4            | 52.0  | 4.5     |
| TEM-15                            | 472         | 32072       | 2.14 | 18.27       | 3.0    | 0.508      | 4.6    | 0.06733    | 3.5    | 0.764       | 420.1      | 14.3    | 417.0      | 15.8    | 400.0            | 66.6  | -5.0    |
| Temora 2 no CA Run 1 (discordant) |             |             |      |             |        |            |        |            |        |             |            |         |            |         |                  |       |         |
| TEM-12                            | 90          | 6390        | 1.28 | 18.83       | 8.0    | 0.889      | 60.5   | 0.12149    | 60.0   | 0.991       | 739.1      | 419.1   | 646.0      | 291.3   | 332.7            | 181.9 | -122.2  |
| Temora 2 no CA Run 2              |             |             |      |             |        |            |        |            |        |             |            |         |            |         |                  |       |         |
| TEM 1                             | 110         | 49162       | 3.91 | 18.305      | 2.4    | 0.488      | 3.9    | 0.0648     | 3      | 0.774       | 404.8      | 11.7    | 403.5      | 12.9    | 396.1            | 54.8  | -2.2    |
| TEM 10                            | 144         | 52641       | 1.88 | 18.525      | 2.9    | 0.5012     | 4.2    | 0.0674     | 3.1    | 0.722       | 420.3      | 12.4    | 412.5      | 14.4    | 369.3            | 66    | -13.8   |
| TEM 11                            | 899         | 125663      | 2.19 | 18.093      | 1.5    | 0.5172     | 2.8    | 0.0679     | 2.3    | 0.839       | 423.5      | 9.5     | 423.2      | 9.6     | 422.1            | 33.7  | -0.3    |
| TEM 12                            | 435         | 64074       | 1.85 | 18.307      | 2.2    | 0.5162     | 3      | 0.0686     | 2      | 0.678       | 427.5      | 8.4     | 422.6      | 10.4    | 395.8            | 49.6  | -8.0    |
| TEM 13                            | 131         | 32596       | 3.86 | 18.16       | 2.7    | 0.5033     | 4.1    | 0.0663     | 3.1    | 0.759       | 413.9      | 12.4    | 413.9      | 13.9    | 413.9            | 59.4  | NA      |
| TEM 14                            | 68          | 46718       | 2.36 | 18.511      | 4.9    | 0.5062     | 6.7    | 0.068      | 4.6    | 0.679       | 424        | 18.8    | 415.9      | 23      | 371              | 111.4 | -14.3   |
| TEM 15                            | 272         | 258570      | 2.03 | 18.017      | 2.9    | 0.496      | 4.2    | 0.0649     | 3      | 0.715       | 405        | 11.8    | 409        | 14.2    | 431.5            | 65.6  | 6.1     |
| TEM 16                            | 642         | 183024      | 2.1  | 17.924      | 2      | 0.516      | 3      | 0.0671     | 2.3    | 0.759       | 418.7      | 9.3     | 422.5      | 10.5    | 443              | 43.9  | 5.5     |
| TEM 17                            | 297         | 98274       | 2.17 | 18.078      | 1.9    | 0.5132     | 3.5    | 0.0673     | 3      | 0.844       | 420        | 12.1    | 420.6      | 12.1    | 424              | 42    | 0.9     |
| TEM 18                            | 1541        | 1707168     | 1.69 | 18.103      | 2      | 0.5505     | 3.1    | 0.0723     | 2.4    | 0.767       | 450        | 10.4    | 445.3      | 11.2    | 420.8            | 44.5  | -6.9    |
| TEM 19                            | 116         | 62264       | 4.21 | 18.34       | 4.1    | 0.4966     | 5.3    | 0.0661     | 3.4    | 0.639       | 412.5      | 13.5    | 409.4      | 17.9    | 391.8            | 91.6  | -5.3    |
| TEM 2                             | 115         | 20551       | 3.76 | 18.646      | 3.7    | 0.4974     | 4.6    | 0.0673     | 2.7    | 0.592       | 419.8      | 11.1    | 409.9      | 15.6    | 354.5            | 84.1  | -18.4   |
| TEM 20                            | 133         | 193361      | 2.93 | 18.161      | 2.6    | 0.5054     | 4.5    | 0.0666     | 3.6    | 0.814       | 415.6      | 14.7    | 415.3      | 15.2    | 413.7            | 58.1  | -0.5    |
| TEM 21                            | 173         | 187120      | 4.47 | 18.303      | 2.3    | 0.5006     | 3.4    | 0.0665     | 2.5    | 0.737       | 415        | 10.1    | 412.1      | 11.5    | 396.3            | 51.6  | -4.7    |
| TEM 22                            | 130         | 41218       | 4.19 | 18.257      | 2.9    | 0.5028     | 4      | 0.0666     | 2.7    | 0.683       | 415.6      | 10.9    | 413.6      | 13.4    | 402              | 64.6  | -3.4    |
| TEM 23                            | 477         | 366736      | 2.31 | 18.088      | 1.8    | 0.5039     | 3      | 0.0661     | 2.4    | 0.789       | 412.8      | 9.4     | 414.3      | 10.1    | 422.8            | 40.9  | 2.4     |
| TEM 24                            | 166         | 65799       | 2.95 | 18.388      | 3.2    | 0.4988     | 3.9    | 0.0666     | 2.3    | 0.579       | 415.4      | 9.1     | 410.9      | 13.2    | 385.9            | 71.5  | -7.6    |
| TEM 25                            | 471         | 419441      | 3.05 | 18.191      | 2.7    | 0.5141     | 3.9    | 0.0679     | 2.8    | 0.719       | 423.2      | 11.4    | 421.2      | 13.3    | 410.1            | 59.9  | -3.2    |
| TEM 26                            | 697         | 210138      | 2.14 | 17.842      | 2.5    | 0.5182     | 3.5    | 0.0671     | 2.4    | 0.699       | 418.6      | 9.8     | 424        | 12      | 453.3            | 55.2  | 7.7     |
| TEM 27                            | 152         | 35093       | 2.33 | 18.187      | 2.7    | 0.5043     | 3.7    | 0.0666     | 2.5    | 0.677       | 415.4      | 10      | 414.6      | 12.5    | 410.5            | 60.6  | -1.2    |
| TEM 28                            | 157         | 56860       | 2.16 | 18.359      | 3.4    | 0.4969     | 4.6    | 0.0662     | 3.1    | 0.676       | 413.2      | 12.6    | 409.6      | 15.7    | 389.4            | 76.7  | -6.1    |
| TEM 29                            | 324         | 1159095     | 2.9  | 18.188      | 2.5    | 0.5129     | 3.8    | 0.0677     | 2.9    | 0.754       | 422.2      | 11.8    | 420.4      | 13.2    | 410.5            | 56.3  | -2.9    |
| TEM 3                             | 93          | 2042540     | 2.93 | 18.082      | 4.3    | 0.5056     | 6.1    | 0.0663     | 4.3    | 0.708       | 414        | 17.4    | 415.5      | 20.9    | 423.5            | 96.4  | 2.2     |
| TEM 30                            | 161         | 96164       | 2.09 | 18.074      | 2.9    | 0.508      | 4.6    | 0.0666     | 3.6    | 0.778       | 415.7      | 14.4    | 417.1      | 15.8    | 424.5            | 64.7  | 2.1     |
| TEM 4                             | 117         | 52883       | 2.58 | 18.146      | 2.9    | 0.4956     | 4.4    | 0.0653     | 3.3    | 0.758       | 407.5      | 13.2    | 408.7      | 14.8    | 415.6            | 64.2  | 1.9     |
| TEM 5                             | 178         | 30481       | 2.01 | 18.122      | 3.7    | 0.5075     | 4.5    | 0.0667     | 2.5    | 0.557       | 416.4      | 10      | 416.7      | 15.3    | 418.5            | 83    | 0.5     |
| TEM 6                             | 194         | 230392      | 2.11 | 18.193      | 2.4    | 0.5017     | 3.6    | 0.0662     | 2.7    | 0.746       | 413.4      | 10.8    | 412.9      | 12.3    | 409.8            | 54.1  | -0.9    |
| TEM 7                             | 135         | 21274       | 3.47 | 18.536      | 3.5    | 0.5065     | 4.1    | 0.0681     | 2.2    | 0.526       | 424.9      | 8.9     | 416.1      | 14.1    | 367.9            | 79.1  | -15.5   |
| TEM 8                             | 296         | 138532      | 3.26 | 18.489      | 2.5    | 0.4961     | 3.6    | 0.0666     | 2.6    | 0.716       | 415.4      | 10.5    | 409.1      | 12.2    | 373.6            | 57    | -11.2   |
| TEM 9                             | 129         | 27664       | 2.6  | 18.742      | 3.2    | 0.5016     | 3.9    | 0.0682     | 2.3    | 0.59        | 425.4      | 9.5     | 412.8      | 13.3    | 342.9            | 71.8  | -24.1   |
| Zircon #                          | Composition |             |      |             |        | Ages       |        |            |        |             |            |         |            |         |                  |       | % Disc. |
|                                   | U (ppm)     | 206Pb/204Pb | U/Th | 206Pb/207Pb | 2σ (%) | 207Pb/235U | 2σ (%) | 206Pb/238U | 2σ (%) | Error Corr. | 206Pb/238U | 2σ (Ma) | 207Pb/235U | 2σ (Ma) | 206Pb/207Pb (Ma) |       |         |
| Temora 2 CA Run 1                 |             |             |      |             |        |            |        |            |        |             |            |         |            |         |                  |       |         |
| TEM-1                             | 295         | 3978        | 2.93 | 18.910      | 2.8    | 0.4931     | 4.2    | 0.06766    | 3.1    | 0.741       | 422.0      | 12.6    | 407.0      | 14.0    | 322.8            | 63.5  | -30.7   |
| TEM-2                             | 177         | 9978        | 3.42 | 18.105      | 3.2    | 0.5039     | 4.2    | 0.06619    | 2.7    | 0.638       | 413.2      | 10.7    | 414.3      | 14.3    | 420.7            | 72.1  | 1.8     |
| TEM-3                             | 260         | 3892        | 4.08 | 18.886      | 3.1    | 0.4835     | 4.5    | 0.06625    | 3.3    | 0.730       | 413.5      | 13.1    | 400.5      | 14.8    | 325.7            | 69.3  | -27.0   |
| TEM-4                             | 225         | 5386        | 3.12 | 17.995      | 6.1    | 0.5133     | 6.7    | 0.06702    | 2.9    | 0.431       | 418.2      | 11.8    | 420.6      | 23.2    | 434.3            | 135.6 | 3.7     |
| TEM-5                             | 395         | 45450       | 2.58 | 17.965      | 2.0    | 0.5282     | 4.0    | 0.06885    | 3.4    | 0.856       | 429.2      | 14.1    | 430.6      | 13.9    | 438.0            | 45.5  | 2.0     |
| TEM-6                             | 364         | 32428       | 2.96 | 18.204      | 2.8    | 0.5224     | 4.4    | 0.06901    | 3.4    | 0.775       | 430.2      | 14.3    | 426.8      | 15.4    | 408.4            | 62.5  | -5.3    |
| TEM-7                             | 143         | 6081        | 2.42 | 17.953      | 5.8    | 0.5023     | 7.7    | 0.06543    | 5.1    | 0.660       | 408.5      | 20.0    | 413.2      | 26.0    | 439.5            | 128.2 | 7.0     |
| TEM-8                             | 331         | 3012        | 2.10 | 19.635      | 2.5    | 0.4670     | 3.5    | 0.06653    | 2.4    | 0.701       | 415.2      | 9.8     | 389.1      | 11.2    | 236.6            | 57.1  | -75.5   |
| TEM-9                             | 445         | 14338       | 2.29 | 18.332      | 2.8    | 0.4985     | 4.7    | 0.06631    | 3.7    | 0.797       | 413.9      | 14.9    | 410.7      | 15.8    | 392.8            | 63.2  | -5.4    |
| TEM-10                            | 296         | 9956        | 1.67 | 18.687      | 2.6    | 0.5075     | 3.5    | 0.06882    | 2.4    | 0.682       | 429.0      | 10.0    | 416.8      | 12.0    | 349.6            | 58.2  | -22.7   |
| TEM-11                            | 197         | 11441       | 1.65 | 18.691      | 3.4    | 0.4936     | 4.6    | 0.06694    | 3.1    | 0.684       | 417.7      | 12.7    | 407.3      | 15.4    | 349.2            | 75.9  | -19.6   |
| TEM-12                            | 416         | 35825       | 2.30 | 18.276      | 2.7    | 0.4966     | 4.8    | 0.06585    | 3.9    | 0.828       | 411.1      | 15.7    | 409.4      | 16.1    | 399.7            | 59.9  | -2.8    |
| TEM-13                            | 222         | 9813        | 1.83 | 17.556      | 2.9    | 0.5233     | 5.3    | 0.06666    | 4.4    | 0.831       | 416.0      | 17.6    | 427.3      | 18.4    | 489.0            | 64.7  | 14.9    |
| TEM-14                            | 372         | 6866        | 2.16 | 19.010      | 4.7    | 0.4742     | 5.6    | 0.06541    | 3.1    | 0.550       | 408.4      | 12.2    | 394.1      | 18.4    | 310.7            | 106.9 | -31.4   |
| TEM-15                            | 153         | 9851        | 2.98 | 18.132      | 4.0    | 0.5027     | 5.3    | 0.06614    | 3.4    | 0.654       | 412.9      | 13.8    | 413.6      | 17.9    | 417.4            | 89.0  | 1.1     |
| Temora 2 CA Run 2                 |             |             |      |             |        |            |        |            |        |             |            |         |            |         |                  |       |         |
| TEM 1                             | 111         | 30198       | 2.31 | 17.885      | 4      | 0.5206     | 5.6    | 0.0676     | 4      | 0.707       | 421.5      | 16.1    | 425.6      | 19.5    | 447.9            | 88    | 5.9     |
| TEM 10                            | 146         | 21580       | 3.01 | 18.386      | 3.9    | 0.4984     | 5      |            |        |             |            |         |            |         |                  |       |         |

|        |     |        |      |        |     |        |      |        |     |       |       |      |       |      |       |       |       |
|--------|-----|--------|------|--------|-----|--------|------|--------|-----|-------|-------|------|-------|------|-------|-------|-------|
| TEM 2  | 321 | 143336 | 2.22 | 18.311 | 3   | 0.5129 | 4.1  | 0.0682 | 2.7 | 0.663 | 425   | 11.1 | 420.4 | 14   | 395.3 | 68.1  | -7.5  |
| TEM 20 | 106 | 20118  | 2.98 | 18.484 | 5.7 | 0.5104 | 6.7  | 0.0685 | 3.6 | 0.537 | 426.8 | 15   | 418.7 | 23.1 | 374.2 | 127.9 | -14.1 |
| TEM 21 | 159 | 28577  | 3.84 | 18.508 | 4.3 | 0.4966 | 5.4  | 0.0667 | 3.2 | 0.594 | 416.1 | 12.9 | 409.4 | 18.1 | 371.3 | 97.3  | -12.1 |
| TEM 22 | 372 | 37491  | 1.91 | 18.324 | 2.6 | 0.4999 | 3.4  | 0.0665 | 2.2 | 0.636 | 414.8 | 8.7  | 411.6 | 11.5 | 393.7 | 58.9  | -5.4  |
| TEM 23 | 105 | 5000   | 2.56 | 19.717 | 9.8 | 0.4709 | 10.6 | 0.0674 | 4.2 | 0.392 | 420.3 | 17   | 391.8 | 34.6 | 226.9 | 226.4 | -85.2 |
| TEM 24 | 255 | 45882  | 1.64 | 18.113 | 2.2 | 0.5122 | 3.3  | 0.0673 | 2.4 | 0.728 | 420   | 9.7  | 419.9 | 11.3 | 419.7 | 50.2  | -0.1  |
| TEM 25 | 85  | 5000   | 3.54 | 18.757 | 9.9 | 0.4881 | 10.9 | 0.0664 | 4.5 | 0.41  | 414.6 | 17.9 | 403.6 | 36.2 | 341.1 | 224.8 | -21.5 |
| TEM 26 | 486 | 115805 | 2.31 | 18.301 | 2.7 | 0.5032 | 4    | 0.0668 | 3   | 0.735 | 417   | 12   | 413.9 | 13.7 | 396.5 | 61.4  | -5.2  |
| TEM 27 | 314 | 46965  | 3.07 | 18.331 | 3.6 | 0.4922 | 5.8  | 0.0655 | 4.5 | 0.78  | 408.8 | 17.8 | 406.4 | 19.3 | 392.9 | 80.8  | -4.0  |
| TEM 28 | 389 | 116446 | 3.53 | 18.101 | 2.7 | 0.501  | 3.3  | 0.0658 | 1.9 | 0.568 | 410.8 | 7.4  | 412.4 | 11.1 | 421.1 | 60.3  | 2.4   |
| TEM 29 | 640 | 252685 | 1.7  | 18.194 | 3   | 0.5112 | 3.8  | 0.0675 | 2.3 | 0.61  | 420.9 | 9.4  | 419.2 | 12.9 | 409.8 | 66.7  | -2.7  |
| TEM 3  | 347 | 41970  | 3.12 | 18.178 | 3.3 | 0.4973 | 4.3  | 0.0656 | 2.7 | 0.641 | 409.6 | 10.9 | 409.9 | 14.4 | 411.7 | 73.5  | 0.5   |
| TEM 30 | 377 | 124650 | 3.49 | 17.929 | 2.8 | 0.4842 | 6.2  | 0.063  | 5.6 | 0.898 | 393.7 | 21.4 | 400.9 | 20.7 | 442.4 | 61.2  | 11.0  |
| TEM 4  | 218 | 145740 | 2.07 | 17.951 | 3.3 | 0.5075 | 4.4  | 0.0661 | 3   | 0.676 | 412.7 | 11.9 | 416.8 | 15.1 | 439.7 | 72.5  | 6.1   |
| TEM 5  | 517 | 330791 | 2.87 | 18.437 | 2.9 | 0.4972 | 3.8  | 0.0665 | 2.5 | 0.653 | 415.1 | 9.9  | 409.8 | 12.8 | 379.9 | 64.6  | -9.3  |
| TEM 6  | 118 | 22302  | 3.38 | 18.359 | 4.9 | 0.4992 | 6.6  | 0.0665 | 4.3 | 0.657 | 415   | 17.3 | 411.1 | 22.2 | 389.5 | 110.9 | -6.5  |
| TEM 7  | 309 | 147241 | 1.84 | 18.315 | 3   | 0.5029 | 4.3  | 0.0668 | 3   | 0.716 | 417   | 12.3 | 413.6 | 14.4 | 394.8 | 66.6  | -5.6  |
| TEM 8  | 340 | 33874  | 2.58 | 18.388 | 2.7 | 0.5002 | 4    | 0.0667 | 2.9 | 0.728 | 416.5 | 11.8 | 411.8 | 13.6 | 385.9 | 61.7  | -7.9  |
| TEM 9  | 289 | 64312  | 1.93 | 18.12  | 3.4 | 0.5069 | 4.3  | 0.0667 | 2.7 | 0.622 | 415.9 | 10.9 | 416.4 | 14.8 | 418.8 | 76    | 0.7   |
