# Supplementary material for: Increased accuracy and precision in igneous and detrital zircon geochronology using CA-LA-ICPMS
Source: Copernicus journal article supplement (doi:10.5194/gchron-2023-20), 2023-08-25
Supplement: Supplementary file 6 [file gchron-2023-20-supplement.zip]

| Zircon #                      | Composition |             |                  |       | Ages       |        |            |         |       |            | % Disc. |         |            |         |             |         |       |
|-------------------------------|-------------|-------------|------------------|-------|------------|--------|------------|---------|-------|------------|---------|---------|------------|---------|-------------|---------|-------|
|                               | U (ppm)     | 206Pb/204Pb | U/Th 206Pb/207Pb | 2σ    | 207Pb/235U | 2σ     | 206Pb/238U | 2σ      | Corr. | 206Pb/238U |         | 2σ (Ma) | 207Pb/235U | 2σ (Ma) | 206Pb/207Pb | 2σ (Ma) |       |
| QGNG no CA Run 1              |             |             |                  |       |            |        |            |         |       |            |         |         |            |         |             |         |       |
| QGNG-1                        | 370         | 57029       | 1.12             | 8.813 | 1.8        | 4.8319 | 3.4        | 0.30896 | 2.9   | 0.842      | 1735.6  | 43.4    | 1790.5     | 28.5    | 1855.0      | 33.1    | 6.4   |
| QGNG-2                        | 133         | 39464       | 1.25             | 9.138 | 2.3        | 4.8139 | 4.2        | 0.31917 | 3.5   | 0.829      | 1785.7  | 54.2    | 1787.3     | 35.2    | 1789.2      | 42.6    | 0.2   |
| QGNG-3                        | 416         | 42406       | 1.10             | 8.745 | 1.7        | 5.1650 | 3.1        | 0.32771 | 2.6   | 0.840      | 1827.3  | 41.3    | 1846.9     | 26.3    | 1869.0      | 30.3    | 0.2   |
| QGNG-4                        | 115         | 64534       | 1.31             | 8.987 | 2.1        | 4.9519 | 4.1        | 0.32292 | 3.6   | 0.867      | 1804.0  | 56.2    | 1811.2     | 34.8    | 1819.4      | 37.3    | 0.9   |
| QGNG-5                        | 139         | 23316       | 1.21             | 8.749 | 1.8        | 4.9994 | 2.8        | 0.31739 | 2.1   | 0.755      | 1777.0  | 32.3    | 1819.2     | 23.3    | 1868.0      | 32.6    | 4.9   |
| QGNG-6                        | 481         | 58369       | 1.16             | 8.888 | 1.7        | 5.0126 | 3.7        | 0.32327 | 3.3   | 0.883      | 1805.7  | 51.9    | 1821.5     | 31.6    | 1839.5      | 31.7    | 1.8   |
| QGNG-7                        | 100         | 19795       | 1.38             | 8.758 | 1.9        | 4.9661 | 3.4        | 0.31556 | 2.8   | 0.817      | 1768.0  | 42.7    | 1813.6     | 28.6    | 1866.3      | 35.2    | 5.3   |
| QGNG-9                        | 223         | 20907       | 1.68             | 8.660 | 1.7        | 5.1931 | 3.5        | 0.32631 | 3.1   | 0.881      | 1825.0  | 49.5    | 1851.5     | 30.2    | 1886.5      | 30.2    | 3.5   |
| QGNG-10                       | 1112        | 221853      | 1.82             | 9.110 | 1.4        | 5.0932 | 3.3        | 0.33668 | 3.0   | 0.910      | 1870.7  | 49.2    | 1835.0     | 28.3    | 1794.7      | 25.1    | -4.2  |
| QGNG-11                       | 144         | 11409       | 1.00             | 8.918 | 1.9        | 4.9928 | 3.2        | 0.32306 | 2.6   | 0.803      | 1804.7  | 40.5    | 1818.1     | 27.1    | 1833.5      | 34.6    | 1.6   |
| QGNG-12                       | 384         | 267981      | 1.09             | 8.762 | 2.0        | 5.1979 | 3.7        | 0.33047 | 3.1   | 0.841      | 1840.6  | 49.4    | 1852.3     | 31.2    | 1865.3      | 35.8    | 1.3   |
| QGNG-13                       | 252         | 34166       | 1.34             | 8.672 | 2.0        | 5.2249 | 3.2        | 0.32875 | 2.5   | 0.779      | 1832.3  | 40.4    | 1856.7     | 27.7    | 1884.1      | 36.7    | 2.7   |
| QGNG-14                       | 354         | 121544      | 1.16             | 8.857 | 2.7        | 5.2014 | 5.3        | 0.33428 | 4.5   | 0.853      | 1859.1  | 72.5    | 1852.8     | 44.8    | 1845.8      | 49.7    | -0.7  |
| QGNG-15                       | 181         | 25729       | 1.82             | 8.931 | 1.6        | 5.0699 | 2.9        | 0.32854 | 2.5   | 0.840      | 1831.3  | 39.2    | 1831.1     | 24.8    | 1830.8      | 28.7    | 0.0   |
| QGNG no CA Run 1 (discordant) |             |             |                  |       |            |        |            |         |       |            |         |         |            |         |             |         |       |
| QGNG-8                        | 177         | 36247       | 0.87             | 8.952 | 2.4        | 5.9582 | 8.9        | 0.38702 | 8.6   | 0.963      | 2109.0  | 154.1   | 1969.8     | 77.4    | 1826.5      | 43.3    | -15.5 |
| QGNG no CA Run 2              |             |             |                  |       |            |        |            |         |       |            |         |         |            |         |             |         |       |
| QGNG 10                       | 524         | 2223097     | 1.5              | 8.969 | 1.4        | 5.0461 | 2.2        | 0.32838 | 1.8   | 0.784      | 1830.5  | 28.1    | 1827       | 19      | 1823.2      | 25.3    | -0.4  |
| QGNG 11                       | 104         | 385964      | 1.9              | 8.891 | 1.6        | 5.2617 | 3.3        | 0.33944 | 2.9   | 0.88       | 1884    | 48      | 1863       | 28.5    | 1839        | 28.7    | -2.4  |
| QGNG 12                       | 182         | 239780      | 1.2              | 8.917 | 1.8        | 5.2128 | 2.7        | 0.33729 | 2     | 0.753      | 1873.6  | 32.8    | 1855       | 22.8    | 1833.5      | 31.9    | -2.2  |
| QGNG 13                       | 309         | 528818      | 1.1              | 8.949 | 1.3        | 5.0003 | 2.3        | 0.32467 | 1.9   | 0.827      | 1812.5  | 30.3    | 1819       | 19.6    | 1827.2      | 23.6    | 0.8   |
| QGNG 14                       | 166         | 1102870     | 1.3              | 8.883 | 2          | 5.1431 | 3.1        | 0.33149 | 2.3   | 0.755      | 1845.6  | 37.2    | 1843       | 26.1    | 1840.6      | 36.5    | -0.3  |
| QGNG 15                       | 141         | 444510      | 1.2              | 8.904 | 1.7        | 5.1101 | 3.1        | 0.33015 | 2.6   | 0.842      | 1839.1  | 41.8    | 1838       | 26.3    | 1836.3      | 30.3    | -0.2  |
| QGNG 16                       | 166         | 381002      | 1.9              | 8.954 | 1.6        | 5.0382 | 3.4        | 0.32732 | 2.9   | 0.871      | 1825.4  | 46.4    | 1826       | 2       |             |         |       |

|         |     |         |     |       |     |        |     |         |     |       |        |      |      |      |        |      |      |
|---------|-----|---------|-----|-------|-----|--------|-----|---------|-----|-------|--------|------|------|------|--------|------|------|
| QGNG 20 | 474 | 382626  | 1.4 | 8.831 | 1.8 | 5.1835 | 2.9 | 0.33214 | 2.3 | 0.787 | 1848.7 | 36.2 | 1850 | 24.4 | 1851.2 | 31.9 | 0.1  |
| QGNG 21 | 310 | 182898  | 1.3 | 8.875 | 1.9 | 5.1476 | 3.5 | 0.33147 | 3   | 0.849 | 1845.5 | 48.1 | 1844 | 30   | 1842.3 | 33.7 | -0.2 |
| QGNG 22 | 194 | 223726  | 1   | 8.798 | 2.2 | 5.1757 | 3.2 | 0.33041 | 2.4 | 0.739 | 1840.4 | 38.4 | 1849 | 27.6 | 1857.9 | 39.5 | 0.9  |
| QGNG 23 | 242 | 79324   | 1.2 | 8.816 | 2   | 5.1446 | 3.4 | 0.3291  | 2.7 | 0.797 | 1834   | 42.9 | 1844 | 28.7 | 1854.2 | 36.8 | 1.1  |
| QGNG 24 | 300 | 4599350 | 1   | 8.78  | 2.1 | 5.146  | 3.8 | 0.32784 | 3.1 | 0.83  | 1827.9 | 49.7 | 1844 | 32   | 1861.6 | 37.9 | 1.8  |
| QGNG 25 | 442 | 388013  | 1   | 8.695 | 1.9 | 5.1785 | 3.2 | 0.32673 | 2.6 | 0.805 | 1822.5 | 41.3 | 1849 | 27.5 | 1879.1 | 34.6 | 3.0  |
| QGNG 26 | 252 | 701467  | 1.1 | 8.712 | 2.2 | 5.1748 | 4.6 | 0.3271  | 4   | 0.877 | 1824.3 | 63.5 | 1849 | 38.8 | 1875.8 | 39.5 | 2.7  |
| QGNG 27 | 365 | 320002  | 1   | 8.749 | 2   | 5.173  | 3.3 | 0.32838 | 2.6 | 0.791 | 1830.5 | 41.6 | 1848 | 28.1 | 1868.1 | 36.5 | 2.0  |
| QGNG 28 | 358 | 463064  | 1   | 8.738 | 2.6 | 5.1578 | 4   | 0.32703 | 3   | 0.752 | 1824   | 47.7 | 1846 | 34   | 1870.2 | 47.5 | 2.5  |
| QGNG 29 | 209 | 398650  | 1.1 | 8.791 | 2.1 | 5.1155 | 3.4 | 0.32631 | 2.7 | 0.79  | 1820.5 | 43.1 | 1839 | 29.3 | 1859.3 | 38.2 | 2.1  |
| QGNG 3  | 186 | 73003   | 1.7 | 8.864 | 1.8 | 5.0454 | 3.3 | 0.3245  | 2.8 | 0.847 | 1811.6 | 44.3 | 1827 | 28   | 1844.5 | 31.8 | 1.8  |
| QGNG 30 | 289 | 2296251 | 0.9 | 8.754 | 2.2 | 5.1148 | 3.7 | 0.3249  | 2.9 | 0.794 | 1813.6 | 45.9 | 1839 | 31.1 | 1866.9 | 40.1 | 2.9  |
| QGNG 4  | 259 | 581358  | 1   | 8.703 | 1.6 | 5.1439 | 2.6 | 0.32485 | 2.1 | 0.796 | 1813.3 | 33.1 | 1843 | 22.4 | 1877.5 | 28.7 | 3.4  |
| QGNG 5  | 371 | 133378  | 1   | 8.771 | 1.6 | 5.1565 | 2.9 | 0.32816 | 2.4 | 0.833 | 1829.4 | 38.9 | 1846 | 24.9 | 1863.6 | 29.3 | 1.8  |
| QGNG 6  | 372 | 247548  | 1   | 8.812 | 1.9 | 5.1355 | 3.1 | 0.32835 | 2.5 | 0.804 | 1830.4 | 40   | 1842 | 26.5 | 1855.1 | 33.6 | 1.3  |
| QGNG 7  | 334 | 1161604 | 0.9 | 8.865 | 2.2 | 5.161  | 3.7 | 0.33197 | 2.9 | 0.796 | 1847.9 | 46.8 | 1846 | 31.1 | 1844.3 | 40.1 | -0.2 |
| QGNG 8  | 673 | 386689  | 1.4 | 8.72  | 2.3 | 5.1169 | 3.3 | 0.32375 | 2.4 | 0.72  | 1808   | 37.5 | 1839 | 28.1 | 1874.1 | 41.3 | 3.5  |
| QGNG 9  | 546 | 1439528 | 1   | 8.838 | 2.2 | 5.1751 | 3.3 | 0.33186 | 2.5 | 0.744 | 1847.4 | 39.5 | 1849 | 28.1 | 1849.8 | 39.9 | 0.1  |
