# Supplementary material for: Increased accuracy and precision in igneous and detrital zircon geochronology using CA-LA-ICPMS
Source: Copernicus journal article supplement (doi:10.5194/gchron-2023-20), 2023-08-25
Supplement: Supplementary file 8 [file gchron-2023-20-supplement.zip]

TABLE S7: SLM LA-ICPMS U-Pb ZIRCON GEOCHRONOLOGY

| Zircon #        | Composition |             |      |             |        |            |        |            |        | Error Corr. | Ages       |         |            |         |             |         |
|-----------------|-------------|-------------|------|-------------|--------|------------|--------|------------|--------|-------------|------------|---------|------------|---------|-------------|---------|
|                 | U (ppm)     | 206Pb/204Pb | U/Th | 206Pb/207Pb | 2σ (%) | 207Pb/235U | 2σ (%) | 206Pb/238U | 2σ (%) |             | 206Pb/238U | 2σ (Ma) | 207Pb/235U | 2σ (Ma) | 206Pb/207Pb | 2σ (Ma) |
| SLM no CA Run 1 |             |             |      |             |        |            |        |            |        |             |            |         |            |         |             |         |
| SLM-1           | 207         | 13334       | 6.00 | 16.587      | 3.3    | 0.7247     | 4.8    | 0.08722    | 3.5    | 0.729       | 539.1      | 18.0    | 553.5      | 20.4    | 613.0       | 70.6    |
| SLM-10          | 437         | 32288       | 3.45 | 17.286      | 1.6    | 0.7157     | 3.0    | 0.08976    | 2.6    | 0.859       | 554.1      | 13.9    | 548.1      | 12.9    | 523.2       | 34.2    |
| SLM-11          | 371         | 58062       | 6.51 | 16.976      | 1.6    | 0.7163     | 3.3    | 0.08824    | 2.9    | 0.870       | 545.1      | 15.0    | 548.5      | 13.9    | 562.7       | 35.3    |
| SLM-12          | 188         | 14747       | 6.28 | 17.134      | 2.6    | 0.7671     | 3.6    | 0.09536    | 2.5    | 0.682       | 587.2      | 13.8    | 578.1      | 15.9    | 542.5       | 57.5    |
| SLM-13          | 351         | 31095       | 4.26 | 17.005      | 2.2    | 0.7380     | 4.2    | 0.09105    | 3.6    | 0.846       | 561.8      | 19.2    | 561.2      | 18.2    | 559.0       | 48.9    |
| SLM-14          | 177         | 72348       | 5.34 | 16.801      | 2.3    | 0.7644     | 4.1    | 0.09319    | 3.4    | 0.828       | 574.4      | 18.9    | 576.5      | 18.3    | 585.2       | 50.4    |
| SLM-15          | 346         | 24512       | 6.31 | 17.106      | 2.0    | 0.7155     | 3.3    | 0.08880    | 2.7    | 0.807       | 548.5      | 14.0    | 548.0      | 14.0    | 546.1       | 42.7    |
| SLM-2           | 131         | 18639       | 7.18 | 17.029      | 2.8    | 0.7519     | 4.5    | 0.09291    | 3.4    | 0.769       | 572.7      | 18.8    | 569.3      | 19.4    | 555.9       | 62.1    |
| SLM-3           | 205         | 4613        | 6.20 | 16.519      | 3.1    | 0.7381     | 4.1    | 0.08847    | 2.8    | 0.666       | 546.5      | 14.4    | 561.3      | 17.9    | 621.9       | 66.7    |
| SLM-4           | 577         | 81163       | 5.13 | 17.106      | 1.4    | 0.7370     | 3.0    | 0.09147    | 2.6    | 0.882       | 564.2      | 14.2    | 560.6      | 12.8    | 546.1       | 30.6    |
| SLM-5           | 776         | 56723       | 5.37 | 17.221      | 1.8    | 0.7204     | 3.5    | 0.09002    | 3.0    | 0.850       | 555.7      | 15.8    | 550.9      | 14.9    | 531.4       | 40.4    |
| SLM-6           | 392         | 207689      | 6.68 | 16.852      | 2.7    | 0.7197     | 4.8    | 0.08801    | 3.9    | 0.819       | 543.7      | 20.4    | 550.5      | 20.3    | 578.6       | 59.4    |
| SLM-7           | 187         | 10636       | 6.23 | 16.646      | 3.9    | 0.7204     | 5.3    | 0.08701    | 3.6    | 0.677       | 537.8      | 18.6    | 550.9      | 22.7    | 605.3       | 84.8    |
| SLM-8           | 480         | 27718       | 5.69 | 18.208      | 4.3    | 0.7038     | 20.2   | 0.09298    | 19.7   | 0.977       | 573.1      | 108.2   | 541.0      | 84.8    | 408.0       | 96.5    |
| SLM-9           | 426         | 65139       | 5.98 | 17.036      | 1.6    | 0.7124     | 2.8    | 0.08806    | 2.3    | 0.820       | 544.1      | 11.9    | 546.2      | 11.8    | 555.0       | 34.8    |
| SLM no CA Run 2 |             |             |      |             |        |            |        |            |        |             |            |         |            |         |             |         |
| SLM 1           | 365         | 82685       | 3.89 | 16.967      | 2.4    | 0.7261     | 3.2    | 0.0894     | 2      | 0.647       | 551.9      | 10.8    | 554.3      | 13.5    | 563.9       | 52.5    |
| SLM 10          | 351         | 105401      | 4.03 | 17.014      | 2.6    | 0.7293     | 3.5    | 0.09       | 2.4    | 0.673       | 555.8      | 12.5    | 556.2      | 15      | 557.9       | 56.4    |
| SLM 11          | 187         | 73916       | 6.51 | 17.083      | 2.8    | 0.7176     | 3.6    | 0.089      | 2.3    | 0.64        | 549.3      | 12.3    | 549.2      | 15.4    | 548.9       | 61      |
| SLM 12          | 342         | 344129      | 6.86 | 17.128      | 2.1    | 0.7248     | 3.5    | 0.0901     | 2.7    | 0.788       | 556        | 14.6    | 553.5      | 14.9    | 543.3       | 46.9    |
| SLM 13          | 532         | 253077      | 5.58 | 16.912      | 2.2    | 0.7249     | 3.2    | 0.089      | 2.4    | 0.74        | 549.4      | 12.5    | 553.6      | 13.7    | 570.9       | 46.9    |
| SLM 14          | 324         | 301471      | 6.96 | 17.202      | 2.3    | 0.7062     | 3.6    | 0.0881     | 2.8    | 0.782       | 544.5      | 14.8    | 542.5      | 15.2    | 533.9       | 49.4    |
| SLM 15          | 351         | 118662      | 4.03 | 17.133      | 2.5    | 0.734      | 4.2    | 0.0913     | 3.3    | 0.796       | 563        | 17.9    | 558.9      | 17.9    | 542.5       | 55.3    |
| SLM 16          | 180         | 52805       | 7.15 | 17.255      | 2.9    | 0.6972     | 3.7    | 0.0873     | 2.4    | 0.641       | 539.5      | 12.4    | 537.1      | 15.6    | 527.1       | 63.1    |
| SLM 17          | 672         | 424775      | 5.53 | 17.054      | 2      | 0.7378     | 3.1    | 0.0913     | 2.4    | 0.777       | 563.2      | 13      | 561.1      | 13.4    | 552.6       | 42.6    |
| SLM 18          | 329         | 101331      | 6.81 | 16.978      | 2.2    | 0.7228     | 4      | 0.089      | 3.3    | 0.837       | 549.9      | 17.6    | 552.3      | 17      | 562.4       | 47.7    |
| SLM 19          | 170         | 65655       | 6.69 | 17.117      | 2.4    | 0.7113     | 3.9    | 0.0883     | 3.1    | 0.787       | 545.7      | 16      | 545.5      | 16.4    | 544.6       | 52.4    |
| SLM 2           | 543         | 331675      | 5.71 | 17.122      | 1.6    | 0.7222     | 3      | 0.0897     | 2.5    | 0.834       | 553.9      | 13.1    | 552        | 12.6    | 544         | 35.8    |
| SLM 20          | 345         | 639867      | 3.93 | 16.974      | 2.2    | 0.7424     | 3.2    | 0.0914     | 2.4    | 0.742       | 564        | 13      | 563.8      | 14      | 562.9       | 47.3    |
| SLM 21          | 421         | 80490       | 6.12 | 17.279      | 2      | 0.704      | 3.6    | 0.0883     | 3      | 0.83        | 545.2      | 15.5    | 541.2      | 15      | 524         | 43.6    |
| SLM 22          | 125         | 88185       | 6.64 | 16.881      | 2.7    | 0.7405     | 4.3    | 0.0907     | 3.3    | 0.772       | 559.7      | 17.7    | 562.7      | 18.5    | 574.9       | 59.2    |
| SLM 23          | 419         | 646582      | 6.12 | 17.382      | 2.1    | 0.7025     | 3.3    | 0.0886     | 2.6    | 0.782       | 547.2      | 13.7    | 540.3      | 14      | 511         | 45.7    |
| SLM 24          | 120         | 103566      | 6.38 | 17.001      | 3.1    | 0.7456     | 4.5    | 0.092      | 3.3    | 0.733       | 567.2      | 17.8    | 565.7      | 19.5    | 559.4       | 66.5    |
| SLM 25          | 342         | 150869      | 7.02 | 16.982      | 2.1    | 0.7125     | 3.4    | 0.0878     | 2.6    | 0.779       | 542.5      | 13.7    | 546.2      | 14.3    | 561.8       | 46.4    |
| SLM 26          | 192         | 338877      | 6.52 | 17.091      | 2.9    | 0.7274     | 5.5    | 0.0902     | 4.7    | 0.85        | 556.7      | 24.9    | 555        | 23.5    | 548         | 63.3    |
| SLM 27          | 352         | 163579      | 3.81 | 16.829      | 2      | 0.7392     | 3.2    | 0.0903     | 2.5    | 0.783       | 557.1      | 13.4    | 561.9      | 13.8    | 581.6       | 43.2    |
| SLM 28          | 360         | 1E+07       | 3.91 | 16.908      | 2.1    | 0.7429     | 3.4    | 0.0912     | 2.6    | 0.779       | 562.3      | 14.1    | 564.1      | 14.5    | 571.4       | 45.7    |
| SLM 29          | 544         | 1E+07       | 5.68 | 16.896      | 2.3    | 0.7366     | 3.6    | 0.0903     | 2.7    | 0.76        | 557.4      | 14.4    | 560.4      | 15.3    | 572.9       | 50.2    |
| SLM 3           | 562         | 141347      | 5.57 | 17.086      | 2.2    | 0.7244     | 3.2    | 0.0898     | 2.3    | 0.719       | 554.4      | 12.3    | 553.3      | 13.8    | 548.6       | 49      |
| SLM 30          | 456         | 128673      | 5.71 | 17.067      | 2.2    | 0.7319     | 3.8    | 0.0906     | 3.1    | 0.816       | 559.3      | 16.6    | 557.7      | 16.3    | 551.1       | 47.9    |
| SLM 4           | 545         | 293124      | 5.97 | 17.088      | 2.5    | 0.7224     | 3.5    | 0.0896     | 2.4    | 0.687       | 553        | 12.6    | 552.1      | 14.7    | 548.4       | 54.9    |
| SLM 5           | 315         | 268686      | 4.64 | 17.104      | 1.8    | 0.7194     | 3      | 0.0893     | 2.4    | 0.795       | 551.3      | 12.4    | 550.3      | 12.6    | 546.2       | 39.2    |
| SLM 6           | 382         | 133547      | 3.8  | 17.069      | 2.6    | 0.726      | 3.5    | 0.0899     | 2.3    | 0.656       | 555        | 12.2    | 554.2      | 15      | 550.8       | 57.7    |
| SLM 7           | 341         | 258430      | 4.17 | 17.249      | 2.2    | 0.7224     | 3.1    | 0.0904     | 2.2    | 0.703       | 558        | 11.7    | 552.1      | 13.3    | 527.8       | 48.7    |
| SLM 8           | 196         | 481965      | 6.76 | 17.08       | 3.3    | 0.7347     | 4.4    | 0.0911     | 2.9    | 0.657       | 561.8      | 15.4    | 559.3      | 18.8    | 549.4       | 71.8    |
| SLM 9           | 562         | 253778      | 5.71 | 16.865      | 2      | 0.7264     | 3.3    | 0.0889     | 2.5    | 0.781       | 549        | 13.4    | 554.4      | 13.9    | 576.9       | 44.1    |
| Ages            |             |             |      |             |        |            |        |            |        |             |            |         |            |         |             |         |
| Zircon #        | U (ppm)     | 206Pb/204Pb | U/Th | 206Pb/207Pb | 2σ (%) | 207Pb/235U | 2σ (%) | 206Pb/238U | 2σ (%) | Error Corr. | 206Pb/238U | 2σ (Ma) | 207Pb/235U | 2σ (Ma) | 206Pb/207Pb | 2σ (Ma) |
| SLM CA Run 1    |             |             |      |             |        |            |        |            |        |             |            |         |            |         |             |         |
| SLM-1           | 1080        | 170477      | 5.50 | 17.003      | 2.3    | 0.7299     | 3.8    | 0.09005    | 3.0    | 0.793       | 555.8      | 15.9    | 556.5      | 16.1    | 559.2       | 50.0    |
| SLM-3           | 945         | 38391       | 5.08 | 17.253      | 1.6    | 0.7217     | 3.5    | 0.09034    | 3.1    | 0.885       | 557.6      | 16.7    | 551.7      | 15.1    | 527.3       | 36.1    |
| SLM-4           | 995         | 37284       | 5.30 | 16.879      | 1.8    | 0.7551     | 3.2    | 0.09247    | 2.7    | 0.838       | 570.1      | 14.7    | 571.2      | 14.0    | 575.2       | 38.1    |
| SLM-5           | 212         | 6968        | 4.92 | 17.427      | 2.8    | 0.7045     | 3.8    | 0.08909    | 2.5    | 0.667       | 550.1      | 13.3    | 541.5      | 15.9    | 505.4       | 62.1    |
| SLM-6           | 1024        | 8237        | 5.54 | 17.287      | 1.7    | 0.7113     | 3.3    | 0.08922    | 2.8    | 0.863       | 550.9      | 15.0    | 545.5      | 13.9    | 523.0       | 36.4    |
| SLM-8           | 943         | 33885       | 5.44 | 16.858      | 2.1    | 0.7397     | 3.3    | 0.09048    | 2.5    | 0.765       | 558.4      | 13.5    | 562.2      | 14.2    | 577.8       | 46.0    |
| SLM-7           | 1026        | 38414       | 5.06 | 16.913      | 2.0    | 0.7395     | 3.1    | 0.09076    | 2.3    | 0.757       | 560.0      | 12.6    | 562.1      | 13.4    | 570.7       | 44.0    |
| SLM-10          | 726         | 109262      | 5.23 | 16.873      | 2.8    | 0.7263     | 4.2    | 0.08892    | 3.1    | 0.744       | 549.2      | 16.3    | 554.4      | 17.8    | 576.0       | 60.5    |
| SLM-9           | 387         | 47428       | 5.75 | 16.719      | 2.3    | 0.7605     | 3.9    | 0.09226    | 3.2    | 0.811       | 568.9      | 17.3    | 574.3      | 17.2    | 595.8       | 49.7    |
| SLM-11          | 1034        | 38532       | 5.21 | 17.403      | 2.0    | 0.7355     | 3.5    | 0.09288    | 2.9    | 0.827       | 572.5      | 15.8    | 559.8      | 15.0    | 508.3       | 43.1    |
| SLM-12          | 1057        | 37831       | 5.25 | 17.019      | 2.1    | 0.7348     | 3.0    | 0.09074    | 2.0    | 0.691       | 559.9      | 11.0    | 559.4      | 12.8    | 557.2       | 46.8    |
| SLM-13          | 966         | 16653       | 5.25 | 17.079      | 2.1    | 0.7446     | 3.2    | 0.09227    | 2.4    | 0.760       | 568.9      | 13.3    | 565.1      | 13.9    | 549.6       | 45.5    |
| SLM-14          | 907         | #####       | 5.12 | 16.646      | 2.0    | 0.7454     | 3.6    | 0.09003    | 3.0    | 0.833       | 555.7      | 16.1    | 565.5      | 15.7    | 605.3       | 43.4    |
| SLM-2           | 969         | 56602       | 5.42 | 17.844      | 4.5    | 0.7276     | 8.9    | 0.09421    | 7.7    | 0.862       | 580.4      | 42.6    | 555.2      | 38.1    | 453.0       | 100.2   |
| SLM-15          | 1000        | 45967       | 5.43 | 16.628      | 2.1    | 0.7487     | 2.7    | 0.09034    | 1.8    | 0.663       | 557.5      | 9.7     | 567.5      | 11.9    | 607.6       | 44.4    |
| SLM CA Run 2    |             |             |      |             |        |            |        |            |        |             |            |         |            |         |             |         |
| SLM 1           | 1188        | 1E+06       | 5.08 | 16.946      | 2.3    | 0.7366     | 3.2    | 0.0906     | 2.2    | 0.693       | 558.9      | 11.9    | 560.4      | 13.8    | 566.5       | 50.3    |
| SLM 10          | 837         | 214351      | 5.04 | 16.955      | 1.9    | 0.7422     | 3.2    | 0.0913     | 2.6    | 0.809       | 563.2      | 14      | 563.7      |         |             |         |

|        |      |        |      |        |     |        |     |        |     |       |       |      |       |      |       |      |
|--------|------|--------|------|--------|-----|--------|-----|--------|-----|-------|-------|------|-------|------|-------|------|
| SLM 20 | 240  | 172597 | 4.44 | 17.028 | 2.7 | 0.7589 | 3.6 | 0.0938 | 2.3 | 0.642 | 577.8 | 12.6 | 573.4 | 15.6 | 556   | 59.5 |
| SLM 21 | 831  | 2E+06  | 4.98 | 17.06  | 1.9 | 0.7408 | 2.7 | 0.0917 | 2   | 0.721 | 565.6 | 10.7 | 562.9 | 11.8 | 551.9 | 41.4 |
| SLM 22 | 1248 | 430158 | 5.05 | 16.804 | 1.7 | 0.744  | 3.2 | 0.0907 | 2.7 | 0.843 | 559.7 | 14.3 | 564.7 | 13.7 | 584.9 | 36.8 |
| SLM 23 | 1145 | 3E+06  | 5.23 | 17.082 | 2   | 0.7331 | 3.2 | 0.0909 | 2.5 | 0.783 | 560.6 | 13.4 | 558.4 | 13.7 | 549.1 | 43.3 |
| SLM 24 | 1179 | 325083 | 4.78 | 16.837 | 1.7 | 0.7406 | 2.8 | 0.0905 | 2.2 | 0.792 | 558.4 | 11.9 | 562.7 | 12.2 | 580.5 | 37.3 |
| SLM 25 | 1071 | 286485 | 5.26 | 17.051 | 2.3 | 0.7335 | 3   | 0.0908 | 2   | 0.658 | 559.9 | 10.7 | 558.6 | 13   | 553.1 | 49.6 |
| SLM 26 | 1141 | 116626 | 5.15 | 16.911 | 1.8 | 0.7379 | 4.7 | 0.0906 | 4.3 | 0.919 | 558.8 | 23.1 | 561.2 | 20.2 | 571   | 40.3 |
| SLM 27 | 1059 | 544134 | 4.8  | 17.05  | 1.6 | 0.7414 | 2.2 | 0.0917 | 1.5 | 0.699 | 565.7 | 8.3  | 563.2 | 9.5  | 553.2 | 34.4 |
| SLM 28 | 1041 | 485514 | 4.9  | 17.021 | 1.8 | 0.7363 | 2.8 | 0.0909 | 2.2 | 0.762 | 561   | 11.6 | 560.2 | 12.2 | 556.9 | 40.2 |
| SLM 29 | 1166 | 4E+06  | 5.04 | 17.07  | 1.7 | 0.7343 | 2.5 | 0.091  | 1.9 | 0.738 | 561.1 | 10   | 559   | 10.9 | 550.6 | 37.2 |
| SLM 3  | 1210 | 1E+06  | 5.2  | 17.001 | 2   | 0.7374 | 2.8 | 0.091  | 2.1 | 0.726 | 561.3 | 11.1 | 560.9 | 12.3 | 559.5 | 42.7 |
| SLM 30 | 1118 | 606987 | 5.33 | 16.906 | 1.9 | 0.7388 | 2.6 | 0.0906 | 1.8 | 0.7   | 559.2 | 9.8  | 561.7 | 11.3 | 571.6 | 40.6 |
| SLM 4  | 1074 | 6E+06  | 4.86 | 16.789 | 1.4 | 0.7405 | 2.4 | 0.0902 | 1.9 | 0.802 | 556.7 | 10.2 | 562.7 | 10.3 | 586.8 | 30.8 |
| SLM 5  | 1108 | 280175 | 5.16 | 16.91  | 1.5 | 0.7359 | 2.3 | 0.0903 | 1.7 | 0.731 | 557.3 | 8.9  | 560   | 9.8  | 571.2 | 33.7 |
| SLM 6  | 1096 | 262113 | 5.23 | 16.745 | 2   | 0.7401 | 3.1 | 0.0899 | 2.4 | 0.762 | 555.1 | 12.7 | 562.5 | 13.5 | 592.4 | 44   |
| SLM 7  | 1218 | 372548 | 4.77 | 17.054 | 2   | 0.7251 | 3   | 0.0897 | 2.3 | 0.757 | 553.9 | 12   | 553.6 | 12.8 | 552.7 | 42.6 |
| SLM 8  | 1148 | 315856 | 5.32 | 16.995 | 1.8 | 0.7288 | 2.6 | 0.0899 | 1.9 | 0.716 | 554.8 | 10   | 555.8 | 11.2 | 560.2 | 39.9 |
| SLM 9  | 1047 | 3E+06  | 5.43 | 16.997 | 1.8 | 0.7312 | 2.8 | 0.0902 | 2.1 | 0.763 | 556.6 | 11.3 | 557.3 | 11.9 | 560   | 39.2 |

%  
Disc.

|       |
|-------|
| 12.1  |
| -5.9  |
| 3.1   |
| -8.2  |
| -0.5  |
| 1.9   |
| -0.4  |
| -3.0  |
| 12.1  |
| -3.3  |
| -4.6  |
| 6.0   |
| 11.1  |
| -40.5 |
| 2.0   |
| 2.1   |
| 0.4   |
| -0.1  |
| -2.3  |
| 3.8   |
| -2.0  |
| -3.8  |
| -2.4  |
| -1.9  |
| 2.2   |
| -0.2  |
| -1.8  |
| -0.2  |
| -4.0  |
| 2.6   |
| -7.1  |
| -1.4  |
| 3.4   |
| -1.6  |
| 4.2   |
| 1.6   |
| 2.7   |
| -1.1  |
| -1.5  |
| -0.8  |
| -0.9  |
| -0.8  |
| -5.7  |
| -2.3  |
| 4.8   |

%  
Disc.

|       |
|-------|
| 0.6   |
| -5.7  |
| 0.9   |
| -8.9  |
| -5.3  |
| 3.4   |
| 1.9   |
| 4.7   |
| 4.5   |
| -12.6 |
| -0.5  |
| -3.5  |
| 8.2   |
| -28.1 |
| 8.2   |
| 1.3   |
| 0.4   |
| -3.9  |
| 1.9   |
| 4.1   |
| -6.6  |
| -6.5  |
| -3.7  |
| -0.8  |
| 3.2   |
| 0.2   |
| 0.0   |

-3.9  
-2.5  
4.3  
-2.1  
3.8  
-1.2  
2.1  
-2.3  
-0.7  
-1.9  
-0.3  
2.2  
5.1  
2.4  
6.3  
-0.2  
1.0  
0.6
