# Supplementary material for: Increased accuracy and precision in igneous and detrital zircon geochronology using CA-LA-ICPMS
Source: Copernicus journal article supplement (doi:10.5194/gchron-2023-20), 2023-08-25
Supplement: Supplementary file 10 [file gchron-2023-20-supplement.zip]

**TABLE S18: NM8A (no CA) LA-ICPMS U-Pb ZIRCON GEOCHRONOLOGY**

| #            | <u>Composition</u> |           |        |      |                   |                   |                   |       |     |             | <u>Ages</u> |            |                   |                   |        |      |       |  |
|--------------|--------------------|-----------|--------|------|-------------------|-------------------|-------------------|-------|-----|-------------|-------------|------------|-------------------|-------------------|--------|------|-------|--|
|              | Zircon             | U         | 206Pb/ | U/Th | 206Pb/ 1 $\sigma$ | 207Pb/ 1 $\sigma$ | 206Pb/ 1 $\sigma$ | Error |     |             | 206Pb/      | 1 $\sigma$ | 207Pb/ 1 $\sigma$ | 206Pb/ 1 $\sigma$ | %      |      |       |  |
|              |                    | (ppm)     | 204Pb  |      | 207Pb (%)         | 235U (%)          | 238U (%)          | Corr. |     |             | 238U        | (Ma)       | 235U              | (Ma)              | 207Pb  | (Ma) | Disc. |  |
| <b>Run 1</b> |                    |           |        |      |                   |                   |                   |       |     |             |             |            |                   |                   |        |      |       |  |
| Spot 1       | 669                | 29964.4   | 5.3    | 15.2 | 0.9               | 0.7               | 2.1               | 0.1   | 1.9 | 0.910491342 | 474.0       | 8.8        | 531.9             | 8.8               | 788.7  | 18.5 | 39.9  |  |
| Spot 2       | 259                | 58210.4   | 1.8    | 17.0 | 1.2               | 0.7               | 2.0               | 0.1   | 1.5 | 0.778781167 | 506.9       | 7.5        | 516.6             | 8.0               | 560.0  | 26.9 | 9.5   |  |
| Spot 3       | 448                | 5788.9    | 3.5    | 19.5 | 3.1               | 0.1               | 4.3               | 0.0   | 1.7 | 0.388083183 | 92.9        | 1.5        | 95.0              | 3.9               | 147.5  | 92.9 | 37.0  |  |
| Spot 6       | 568                | 50161.6   | 4.5    | 12.5 | 1.1               | 2.0               | 2.2               | 0.2   | 1.9 | 0.857266561 | 1099.1      | 18.8       | 1130.0            | 14.8              | 1189.9 | 22.0 | 7.6   |  |
| Spot 7       | 908                | 80811.8   | 15.8   | 12.4 | 0.7               | 2.2               | 1.3               | 0.2   | 1.1 | 0.833450915 | 1173.5      | 11.4       | 1188.9            | 9.0               | 1217.0 | 13.9 | 3.6   |  |
| Spot 8       | 267                | 4861.0    | 1.9    | 18.8 | 1.7               | 0.3               | 4.1               | 0.0   | 2.2 | 0.541319173 | 248.0       | 5.4        | 244.1             | 9.0               | 206.4  | 80.5 | -20.2 |  |
| Spot 9       | 103                | 86535.5   | 3.5    | 14.3 | 1.1               | 1.4               | 2.1               | 0.1   | 1.7 | 0.835781649 | 877.4       | 14.1       | 894.2             | 12.2              | 935.9  | 23.1 | 6.2   |  |
| Spot 10      | 275                | 27735.2   | 1.7    | 19.1 | 1.1               | 0.3               | 1.8               | 0.0   | 1.4 | 0.767571523 | 263.9       | 3.5        | 267.1             | 4.1               | 294.8  | 25.8 | 10.5  |  |
| Spot 11      | 266                | 80115.1   | 3.0    | 11.1 | 0.7               | 2.8               | 1.5               | 0.2   | 1.3 | 0.862400444 | 1312.3      | 14.9       | 1363.3            | 10.9              | 1444.3 | 14.0 | 9.1   |  |
| Spot 12      | 71                 | 16460.0   | 2.7    | 12.3 | 1.5               | 2.2               | 2.0               | 0.2   | 1.3 | 0.651046674 | 1135.4      | 13.4       | 1166.4            | 13.7              | 1224.4 | 29.4 | 7.3   |  |
| Spot 13      | 755                | 240506.6  | 3.0    | 12.4 | 0.8               | 2.4               | 1.6               | 0.2   | 1.4 | 0.860778278 | 1233.3      | 15.7       | 1231.5            | 11.6              | 1228.3 | 16.2 | -0.4  |  |
| Spot 15      | 279                | 85796.0   | 3.6    | 12.5 | 0.7               | 2.1               | 1.4               | 0.2   | 1.2 | 0.85830459  | 1108.1      | 12.1       | 1142.1            | 9.5               | 1207.3 | 14.0 | 8.2   |  |
| Spot 16      | 1377               | 63559.8   | 1.7    | 19.1 | 0.8               | 0.3               | 1.4               | 0.0   | 1.2 | 0.842411239 | 251.5       | 2.9        | 257.7             | 3.2               | 314.4  | 17.4 | 20.0  |  |
| Spot 17      | 421                | 54893.3   | 1.6    | 8.5  | 1.0               | 5.3               | 2.0               | 0.3   | 1.7 | 0.867931607 | 1796.9      | 26.7       | 1863.9            | 16.7              | 1939.4 | 17.4 | 7.3   |  |
| Spot 18      | 94                 | 62192.5   | 3.6    | 12.3 | 0.9               | 2.1               | 1.5               | 0.2   | 1.2 | 0.806758304 | 1103.6      | 11.9       | 1148.3            | 10.0              | 1233.9 | 16.9 | 10.6  |  |
| Spot 19      | 818                | 16851.2   | 2.3    | 17.5 | 1.1               | 0.6               | 1.8               | 0.1   | 1.4 | 0.793988917 | 459.6       | 6.2        | 462.3             | 6.6               | 475.9  | 23.8 | 3.4   |  |
| Spot 20      | 606                | 18634.7   | 1.5    | 18.2 | 2.6               | 0.3               | 3.0               | 0.0   | 1.5 | 0.499282903 | 253.1       | 3.7        | 267.3             | 7.1               | 394.0  | 58.4 | 35.8  |  |
| Spot 22      | 139                | 3699.2    | 1.5    | 18.1 | 2.4               | 0.3               | 3.2               | 0.0   | 1.5 | 0.455761237 | 265.3       | 3.8        | 265.6             | 7.5               | 268.4  | 65.2 | 1.2   |  |
| Spot 23      | 273                | 8315082.4 | 5.3    | 12.8 | 0.8               | 2.0               | 1.7               | 0.2   | 1.5 | 0.893243874 | 1098.8      | 15.1       | 1120.0            | 11.4              | 1161.5 | 14.9 | 5.4   |  |
| Spot 24      | 561                | 134026.2  | 3.0    | 12.7 | 1.0               | 2.1               | 1.7               | 0.2   | 1.4 | 0.815324729 | 1127.1      | 14.3       | 1142.4            | 11.6              | 1171.5 | 19.5 | 3.8   |  |
| Spot 25      | 394                | 4462.7    | 1.5    | 18.9 | 0.9               | 0.3               | 1.6               | 0.1   | 1.3 | 0.798335804 | 319.4       | 4.0        | 304.6             | 4.2               | 192.6  | 22.3 | -65.9 |  |
| Spot 26      | 463                | 38247.6   | 1.8    | 13.1 | 1.2               | 1.8               | 2.0               | 0.2   | 1.6 | 0.804810964 | 996.3       | 14.7       | 1031.7            | 12.9              | 1107.6 | 23.5 | 10.0  |  |
| Spot 27      | 656                | 115953.0  | 4.3    | 11.7 | 1.7               | 2.5               | 2.5               | 0.2   | 1.8 | 0.712153062 | 1233.2      | 19.8       | 1272.8            | 18.0              | 1340.4 | 33.6 | 8.0   |  |
| Spot 28      | 36                 | 47380.2   | 2.8    | 13.7 | 2.4               | 1.5               | 3.8               | 0.2   | 3.0 | 0.780081914 | 901.8       | 25.0       | 938.7             | 23.4              | 1026.1 | 48.3 | 12.1  |  |
| Spot 29      | 720                | 54143.0   | 7.9    | 12.7 | 0.9               | 2.0               | 1.8               | 0.2   | 1.5 | 0.853818897 | 1071.1      | 15.0       | 1106.4            | 12.0              | 1176.6 | 18.4 | 9.0   |  |
| Spot 31      | 241                | 205727.3  | 3.7    | 14.3 | 0.8               | 1.4               | 1.4               | 0.1   | 1.1 | 0.817759922 | 890.3       | 9.4        | 905.3             | 8.3               | 941.9  | 16.4 | 5.5   |  |
| Spot 32      | 63                 | 8536.9    | 3.7    | 13.9 | 1.3               | 1.6               | 2.7               | 0.2   | 2.4 | 0.87375435  | 1001.3      | 22.1       | 987.0             | 17.2              | 955.2  | 27.1 | -4.8  |  |
| Spot 33      | 219                | 5239.7    | 4.0    | 16.8 | 1.5               | 0.4               | 3.3               | 0.1   | 2.6 | 0.79945272  | 344.3       | 8.8        | 365.1             | 10.1              | 499.6  | 43.4 | 31.1  |  |
| Spot 35      | 773                | 52883.8   | 3.9    | 13.1 | 0.8               | 1.7               | 1.4               | 0.2   | 1.2 | 0.843446736 | 959.1       | 10.8       | 1004.8            | 9.1               | 1105.8 | 15.4 | 13.3  |  |
| Spot 36      | 41                 | 7488.7    | 1.5    | 12.5 | 2.1               | 2.1               | 3.4               | 0.2   | 2.6 | 0.772399783 | 1119.9      | 26.8       | 1138.3            | 23.1              | 1173.7 | 42.4 | 4.6   |  |
| Spot 37      | 390                | 11351.7   | 1.9    | 19.4 | 1.1               | 0.3               | 2.1               | 0.0   | 1.4 | 0.677309505 | 265.4       | 3.7        | 261.6             | 4.9               | 227.6  | 35.7 | -16.6 |  |
| Spot 38      | 695                | 25122.8   | 1.6    | 19.8 | 1.4               | 0.3               | 3.0               | 0.0   | 2.6 | 0.882394403 | 272.1       | 7.0        | 265.5             | 7.0               | 207.9  | 32.6 | -30.9 |  |
| Spot 39      | 84                 | 14276.8   | 4.1    | 13.8 | 1.7               | 1.4               | 2.2               | 0.1   | 1.3 | 0.609172105 | 875.2       | 10.8       | 906.8             | 13.0              | 984.8  | 35.0 | 11.1  |  |
| Spot 40      | 268                | 23973.6   | 2.4    | 14.4 | 0.8               | 1.4               | 1.5               | 0.1   | 1.2 | 0.823693898 | 895.0       | 10.4       | 897.7             | 9.0               | 904.3  | 17.6 | 1.0   |  |
| Spot 42      | 460                | 1908802.1 | 5.1    | 13.9 | 0.8               | 1.6               | 1.9               | 0.2   | 1.7 | 0.894228536 | 945.8       | 14.7       | 962.4             | 11.6              | 1000.4 | 16.9 | 5.5   |  |
| Spot 44      | 1129               | 38903.5   | 10.8   | 19.2 | 1.2               | 0.3               | 1.7               | 0.0   | 1.2 | 0.70515509  | 263.4       | 3.0        | 266.2             | 3.9               | 291.3  | 26.8 | 9.6   |  |
| Spot 45      | 1260               | 139456.9  | 11.5   | 13.8 | 0.7               | 1.7               | 1.4               | 0.2   | 1.2 | 0.852780503 | 997.8       | 11.3       | 1003.8            | 9.1               | 1016.9 | 15.1 | 1.9   |  |
| Spot 46      | 1645               | 42108.2   | 15.6   | 11.3 | 0.6               | 2.4               | 1.8               | 0.2   | 1.7 | 0.934947634 | 1148.0      | 17.9       | 1238.1            | 13.0              | 1398.5 | 12.4 | 17.9  |  |

|         |      |            |      |      |     |      |     |     |     |             |        |      |        |      |        |       |       |
|---------|------|------------|------|------|-----|------|-----|-----|-----|-------------|--------|------|--------|------|--------|-------|-------|
| Spot 48 | 271  | 23150.4    | 2.5  | 11.5 | 0.7 | 2.6  | 1.8 | 0.2 | 1.6 | 0.908840566 | 1248.2 | 18.3 | 1288.5 | 12.9 | 1356.3 | 14.3  | 8.0   |
| Spot 49 | 192  | 29853.9    | 1.3  | 15.7 | 2.2 | 0.8  | 3.2 | 0.1 | 2.4 | 0.743906337 | 578.3  | 13.3 | 610.5  | 14.8 | 731.8  | 45.6  | 21.0  |
| Spot 50 | 237  | 59680.6    | 9.2  | 10.4 | 0.7 | 3.3  | 1.8 | 0.2 | 1.7 | 0.920708413 | 1438.2 | 21.7 | 1484.2 | 14.3 | 1550.6 | 13.4  | 7.2   |
| Spot 51 | 180  | 23420.2    | 3.2  | 13.5 | 1.2 | 1.7  | 2.0 | 0.2 | 1.6 | 0.803481115 | 1001.7 | 14.6 | 1011.5 | 12.5 | 1032.9 | 23.5  | 3.0   |
| Spot 53 | 73   | 3285.7     | 3.2  | 13.2 | 1.3 | 1.7  | 2.0 | 0.2 | 1.5 | 0.758457323 | 1020.9 | 14.3 | 1008.1 | 12.8 | 980.6  | 26.5  | -4.1  |
| Spot 55 | 188  | 68999.5    | 1.8  | 16.7 | 1.3 | 0.8  | 1.7 | 0.1 | 1.0 | 0.596073775 | 562.1  | 5.3  | 570.8  | 7.2  | 605.7  | 28.8  | 7.2   |
| Spot 56 | 187  | 20049.9    | 1.9  | 18.6 | 1.4 | 0.5  | 2.4 | 0.1 | 1.9 | 0.7947212   | 444.2  | 8.1  | 428.1  | 8.3  | 342.7  | 32.5  | -29.6 |
| Spot 57 | 117  | 15958.0    | 4.1  | 13.0 | 1.0 | 2.0  | 1.9 | 0.2 | 1.5 | 0.820998331 | 1131.4 | 15.8 | 1124.7 | 12.7 | 1111.9 | 21.2  | -1.8  |
| Spot 58 | 1081 | 33064.3    | 3.3  | 17.9 | 0.9 | 0.5  | 1.6 | 0.1 | 1.4 | 0.831191409 | 415.7  | 5.5  | 419.2  | 5.6  | 438.2  | 20.2  | 5.1   |
| Spot 60 | 299  | 94908.8    | 3.7  | 15.2 | 1.0 | 1.0  | 1.9 | 0.1 | 1.6 | 0.842734039 | 676.2  | 10.2 | 708.5  | 9.7  | 812.2  | 21.3  | 16.7  |
| Spot 61 | 77   | 9962.3     | 1.9  | 19.3 | 4.9 | 0.2  | 6.6 | 0.0 | 4.3 | 0.659465649 | 183.4  | 7.8  | 186.5  | 11.2 | 226.2  | 114.4 | 18.9  |
| Spot 62 | 510  | 100783.6   | 2.1  | 11.7 | 0.9 | 2.5  | 2.0 | 0.2 | 1.7 | 0.878994029 | 1217.9 | 19.1 | 1262.2 | 14.1 | 1338.5 | 18.0  | 9.0   |
| Spot 63 | 403  | 16182.8    | 8.3  | 17.3 | 1.3 | 0.5  | 1.8 | 0.1 | 1.2 | 0.667978683 | 377.0  | 4.3  | 395.2  | 5.8  | 503.2  | 28.9  | 25.1  |
| Spot 64 | 577  | 14908.8    | 1.6  | 19.0 | 1.4 | 0.2  | 2.1 | 0.0 | 1.5 | 0.707729795 | 218.1  | 3.2  | 223.9  | 4.2  | 285.4  | 33.6  | 23.6  |
| Spot 65 | 446  | 2302.4     | 1.0  | 18.6 | 4.1 | 0.1  | 4.8 | 0.0 | 1.8 | 0.386549844 | 53.0   | 1.0  | 53.5   | 2.5  | 76.0   | NA    | 30.3  |
| Spot 66 | 107  | 649.2      | 2.6  | 16.0 | 5.6 | 0.2  | 6.1 | 0.0 | 2.3 | 0.3772672   | 179.0  | 4.1  | 145.8  | 8.3  | NA     | NA    |       |
| Spot 67 | 324  | 205510.7   | 2.5  | 9.9  | 0.7 | 3.4  | 1.5 | 0.2 | 1.3 | 0.865209155 | 1423.8 | 16.0 | 1514.1 | 11.4 | 1642.9 | 13.5  | 13.3  |
| Spot 68 | 169  | 2169.9     | 2.0  | 17.8 | 4.4 | 0.2  | 5.3 | 0.0 | 2.8 | 0.531743769 | 160.5  | 4.4  | 161.9  | 7.9  | 181.6  | 103.7 | 11.6  |
| Spot 69 | 917  | 15275.7    | 1.2  | 19.2 | 0.9 | 0.3  | 1.4 | 0.0 | 1.1 | 0.778752156 | 257.0  | 2.7  | 256.8  | 3.1  | 254.4  | 20.0  | -1.0  |
| Spot 70 | 129  | 51846.1    | 7.4  | 5.8  | 2.7 | 11.1 | 3.2 | 0.5 | 1.8 | 0.568488061 | 2460.5 | 37.8 | 2532.2 | 30.3 | 2590.2 | 44.6  | 5.0   |
| Spot 71 | 695  | 9391.3     | 3.3  | 19.8 | 1.3 | 0.2  | 2.2 | 0.0 | 1.6 | 0.720020915 | 172.3  | 2.7  | 171.5  | 3.5  | 160.8  | 35.7  | -7.2  |
| Spot 72 | 428  | 25550019.2 | 4.6  | 12.5 | 0.9 | 2.2  | 1.6 | 0.2 | 1.4 | 0.843979433 | 1176.6 | 14.8 | 1185.6 | 11.4 | 1202.0 | 17.2  | 2.1   |
| Spot 73 | 384  | 3302.7     | 2.9  | 16.3 | 5.4 | 0.1  | 6.9 | 0.0 | 2.8 | 0.407946473 | 70.5   | 2.0  | 84.3   | 5.5  | 495.2  | 138.0 | 85.8  |
| Spot 75 | 187  | 35585.3    | 4.0  | 12.7 | 0.8 | 2.1  | 1.5 | 0.2 | 1.3 | 0.83737342  | 1147.0 | 13.4 | 1150.9 | 10.5 | 1158.3 | 16.5  | 1.0   |
| Spot 76 | 648  | 20600.5    | 16.6 | 19.8 | 1.4 | 0.2  | 3.1 | 0.0 | 2.8 | 0.896242879 | 224.8  | 6.2  | 222.2  | 6.2  | 195.2  | 32.1  | -15.1 |
| Spot 77 | 232  | 39602.9    | 1.9  | 13.0 | 1.0 | 1.8  | 1.7 | 0.2 | 1.4 | 0.82374362  | 1014.3 | 13.1 | 1045.8 | 11.0 | 1112.0 | 19.1  | 8.8   |
| Spot 78 | 73   | 9591.1     | 1.9  | 14.2 | 1.2 | 1.4  | 1.8 | 0.2 | 1.4 | 0.758165339 | 902.0  | 11.8 | 904.1  | 11.0 | 909.1  | 24.8  | 0.8   |
| Spot 79 | 453  | 7007.4     | 1.5  | 19.1 | 1.2 | 0.3  | 1.6 | 0.0 | 1.0 | 0.623992675 | 239.4  | 2.4  | 237.3  | 3.4  | 216.2  | 29.5  | -10.8 |
| Spot 80 | 340  | 6553.8     | 1.6  | 19.3 | 1.0 | 0.3  | 2.8 | 0.0 | 1.4 | 0.491251151 | 270.9  | 3.6  | 261.6  | 6.4  | 179.4  | 56.4  | -51.0 |
| Spot 81 | 558  | 42638.4    | 6.6  | 15.6 | 0.9 | 0.7  | 2.8 | 0.1 | 2.6 | 0.941770974 | 523.3  | 13.3 | 567.3  | 12.2 | 747.8  | 19.9  | 30.0  |
| Spot 83 | 897  | 33529.7    | 18.8 | 12.2 | 0.8 | 2.2  | 1.5 | 0.2 | 1.2 | 0.83878819  | 1151.0 | 13.1 | 1185.0 | 10.3 | 1247.5 | 15.7  | 7.7   |
| Spot 84 | 135  | 24326.5    | 1.8  | 19.5 | 1.9 | 0.3  | 2.5 | 0.0 | 1.7 | 0.674238879 | 270.6  | 4.5  | 266.6  | 5.9  | 231.1  | 43.2  | -17.1 |
| Spot 85 | 633  | 17724.5    | 0.6  | 19.6 | 1.2 | 0.2  | 1.9 | 0.0 | 1.4 | 0.749315413 | 173.2  | 2.4  | 175.6  | 3.1  | 208.5  | 29.0  | 16.9  |
| Spot 86 | 252  | 97115.1    | 13.8 | 14.4 | 0.6 | 1.4  | 1.4 | 0.1 | 1.2 | 0.881291046 | 882.4  | 9.8  | 892.9  | 8.0  | 918.9  | 13.1  | 4.0   |
| Spot 87 | 45   | 3053.5     | 1.3  | 20.3 | 4.3 | 0.2  | 7.3 | 0.0 | 5.9 | 0.806829476 | 199.9  | 11.6 | 179.4  | 12.0 | NA     | NA    |       |
| Spot 88 | 189  | 4998.1     | 1.0  | 19.1 | 2.7 | 0.2  | 3.4 | 0.0 | 1.6 | 0.477676386 | 187.1  | 3.0  | 185.7  | 5.7  | 167.8  | 69.4  | -11.5 |
| Spot 89 | 385  | 6651.5     | 5.3  | 19.9 | 1.9 | 0.2  | 2.5 | 0.0 | 1.6 | 0.648011    | 195.0  | 3.1  | 188.5  | 4.2  | 108.1  | 44.4  | -80.4 |
| Spot 90 | 376  | 63083.5    | 2.0  | 12.2 | 0.8 | 2.2  | 2.0 | 0.2 | 1.8 | 0.905100691 | 1158.2 | 19.2 | 1187.4 | 14.0 | 1241.0 | 16.6  | 6.7   |
| Spot 92 | 78   | 8961.6     | 1.8  | 16.8 | 2.9 | 0.6  | 3.2 | 0.1 | 1.4 | 0.442045376 | 455.7  | 6.2  | 468.1  | 12.0 | 528.9  | 62.8  | 13.8  |
| Spot 93 | 503  | 182212.8   | 15.7 | 14.3 | 0.9 | 0.9  | 1.9 | 0.1 | 1.7 | 0.876628999 | 596.1  | 9.7  | 669.5  | 9.5  | 925.0  | 19.2  | 35.6  |
| Spot 94 | 534  | 76932.9    | 1.2  | 13.7 | 0.8 | 1.6  | 1.8 | 0.2 | 1.6 | 0.894380096 | 939.7  | 14.2 | 958.7  | 11.3 | 1002.7 | 16.5  | 6.3   |
| Spot 96 | 200  | 3085.7     | 1.9  | 20.3 | 2.1 | 0.2  | 3.5 | 0.0 | 2.0 | 0.577581791 | 164.3  | 3.2  | 149.2  | 4.8  | NA     | NA    |       |
| Spot 97 | 166  | 44494.7    | 5.0  | 14.0 | 1.0 | 1.5  | 2.1 | 0.2 | 1.9 | 0.885908271 | 929.3  | 16.1 | 938.4  | 12.8 | 959.8  | 19.8  | 3.2   |

|          |     |          |      |      |     |     |     |     |     |             |        |      |        |      |        |       |       |
|----------|-----|----------|------|------|-----|-----|-----|-----|-----|-------------|--------|------|--------|------|--------|-------|-------|
| Spot 98  | 152 | 40908.5  | 1.6  | 16.2 | 1.4 | 0.9 | 1.9 | 0.1 | 1.4 | 0.698844625 | 658.9  | 8.5  | 659.3  | 9.4  | 660.3  | 29.8  | 0.2   |
| Spot 99  | 545 | 101677.5 | 13.5 | 12.5 | 0.8 | 2.1 | 1.5 | 0.2 | 1.3 | 0.85666387  | 1133.2 | 13.5 | 1156.6 | 10.5 | 1200.6 | 15.4  | 5.6   |
| Spot 100 | 97  | 11649.6  | 1.2  | 19.2 | 3.0 | 0.3 | 3.6 | 0.0 | 2.1 | 0.578577027 | 277.2  | 5.7  | 272.9  | 8.7  | 235.6  | 68.3  | -17.6 |
| Spot 101 | 184 | 16041.4  | 5.9  | 11.6 | 0.9 | 2.6 | 1.8 | 0.2 | 1.5 | 0.864338802 | 1285.3 | 18.0 | 1297.0 | 13.1 | 1316.4 | 17.4  | 2.4   |
| Spot 102 | 78  | 31245.8  | 1.9  | 12.7 | 1.0 | 2.1 | 1.7 | 0.2 | 1.4 | 0.801477916 | 1149.2 | 14.6 | 1151.8 | 11.9 | 1156.7 | 20.6  | 0.6   |
| Spot 103 | 187 | 340975.0 | 5.8  | 10.4 | 0.9 | 3.4 | 1.4 | 0.3 | 1.1 | 0.769626437 | 1480.0 | 14.2 | 1509.0 | 10.9 | 1549.8 | 16.7  | 4.5   |
| Spot 104 | 108 | 21739.9  | 1.9  | 14.1 | 1.0 | 1.6 | 1.7 | 0.2 | 1.4 | 0.810276227 | 980.0  | 12.8 | 968.7  | 10.9 | 943.1  | 20.9  | -3.9  |
| Spot 105 | 267 | 3722.5   | 1.6  | 18.1 | 1.4 | 0.3 | 2.2 | 0.0 | 1.4 | 0.626245879 | 271.5  | 3.7  | 269.9  | 5.2  | 256.9  | 39.3  | -5.7  |
| Spot 106 | 513 | 12547.2  | 1.6  | 19.0 | 1.2 | 0.3 | 2.0 | 0.0 | 1.7 | 0.81091658  | 258.9  | 4.2  | 259.8  | 4.7  | 268.7  | 27.3  | 3.7   |
| Spot 108 | 217 | 6938.6   | 1.1  | 19.1 | 2.1 | 0.3 | 2.6 | 0.0 | 1.5 | 0.582868258 | 265.3  | 3.9  | 259.5  | 5.9  | 207.0  | 48.6  | -28.2 |
| Spot 109 | 231 | 6865.7   | 1.4  | 19.6 | 1.3 | 0.3 | 1.8 | 0.0 | 1.3 | 0.687100273 | 266.9  | 3.3  | 254.8  | 4.1  | 145.5  | 31.1  | -83.5 |
| Spot 110 | 71  | 1980.6   | 1.7  | 17.9 | 4.1 | 0.3 | 5.0 | 0.0 | 1.9 | 0.369725514 | 260.7  | 4.8  | 247.9  | 11.1 | 128.2  | 110.2 | ####  |
| Spot 111 | 367 | 38028.3  | 2.3  | 11.8 | 1.0 | 2.5 | 1.7 | 0.2 | 1.3 | 0.790772379 | 1251.7 | 14.9 | 1271.5 | 12.0 | 1305.1 | 19.7  | 4.1   |
| Spot 112 | 255 | 33741.4  | 1.8  | 12.4 | 0.9 | 2.0 | 2.1 | 0.2 | 1.9 | 0.898221812 | 1070.7 | 18.9 | 1115.3 | 14.4 | 1203.4 | 18.4  | 11.0  |
| Spot 113 | 265 | 16149.4  | 7.0  | 16.7 | 1.4 | 0.7 | 2.6 | 0.1 | 2.1 | 0.837894715 | 554.5  | 11.4 | 556.6  | 11.0 | 564.9  | 30.5  | 1.8   |
| Spot 114 | 302 | 15201.7  | 1.9  | 19.6 | 2.7 | 0.3 | 5.0 | 0.0 | 4.2 | 0.84150252  | 280.2  | 11.5 | 270.7  | 11.9 | 190.1  | 62.9  | -47.4 |
| Spot 115 | 519 | 6832.8   | 10.3 | 19.6 | 1.3 | 0.2 | 2.0 | 0.0 | 1.4 | 0.738495649 | 232.1  | 3.3  | 224.4  | 4.0  | 144.5  | 31.0  | -60.6 |
| Spot 117 | 792 | 117782.9 | 16.4 | 20.1 | 1.8 | 0.3 | 2.5 | 0.0 | 1.8 | 0.701551823 | 233.4  | 4.1  | 228.1  | 5.2  | 173.4  | 42.4  | -34.6 |
| Spot 118 | 818 | 57265.5  | 10.1 | 13.0 | 0.9 | 1.8 | 1.7 | 0.2 | 1.5 | 0.867642927 | 1023.5 | 14.3 | 1049.7 | 11.4 | 1104.7 | 17.4  | 7.4   |
| Spot 119 | 279 | 12074.0  | 3.8  | 14.2 | 1.0 | 1.2 | 1.9 | 0.1 | 1.6 | 0.837355159 | 786.5  | 11.9 | 818.8  | 10.8 | 907.4  | 21.7  | 13.3  |
| Spot 121 | 179 | 38639.3  | 2.7  | 12.6 | 1.1 | 2.2 | 1.7 | 0.2 | 1.3 | 0.752162633 | 1191.0 | 13.6 | 1182.4 | 11.6 | 1166.7 | 21.7  | -2.1  |
| Spot 122 | 160 | 100006.4 | 1.0  | 8.3  | 0.8 | 5.3 | 1.8 | 0.3 | 1.7 | 0.905625716 | 1780.1 | 25.9 | 1870.1 | 15.7 | 1971.6 | 13.9  | 9.7   |
| Spot 123 | 291 | 17117.0  | 1.4  | 18.5 | 2.0 | 0.3 | 2.5 | 0.0 | 1.5 | 0.605660202 | 282.4  | 4.2  | 288.6  | 6.4  | 339.3  | 45.6  | 16.8  |
| Spot 125 | 866 | 10672.9  | 8.7  | 16.0 | 1.3 | 0.4 | 2.1 | 0.0 | 1.3 | 0.626383351 | 287.3  | 3.6  | 331.2  | 5.8  | 652.5  | 34.4  | 56.0  |
| Spot 126 | 193 | 32507.1  | 1.7  | 19.3 | 1.9 | 0.3 | 2.3 | 0.0 | 1.4 | 0.598754403 | 273.8  | 3.8  | 272.8  | 5.6  | 264.0  | 43.1  | -3.7  |
| Spot 127 | 323 | 54185.9  | 1.6  | 12.5 | 0.8 | 2.0 | 1.8 | 0.2 | 1.6 | 0.883959992 | 1046.3 | 15.2 | 1098.6 | 12.0 | 1203.7 | 16.4  | 13.1  |
| Spot 128 | 341 | 22053.6  | 1.6  | 18.9 | 2.0 | 0.3 | 2.5 | 0.0 | 1.5 | 0.612692996 | 276.1  | 4.1  | 278.8  | 6.1  | 302.2  | 45.0  | 8.6   |
| Spot 130 | 641 | 55474.8  | 1.8  | 12.1 | 0.8 | 2.2 | 1.6 | 0.2 | 1.3 | 0.859908037 | 1128.7 | 13.9 | 1171.3 | 10.8 | 1251.0 | 15.5  | 9.8   |
| Spot 131 | 167 | 15583.5  | 4.9  | 12.7 | 0.7 | 2.1 | 1.7 | 0.2 | 1.5 | 0.899415335 | 1169.6 | 15.9 | 1159.2 | 11.5 | 1139.8 | 14.4  | -2.6  |
| Spot 132 | 115 | 48784.9  | 3.6  | 12.9 | 2.1 | 2.1 | 2.8 | 0.2 | 1.9 | 0.664786383 | 1166.9 | 20.1 | 1151.8 | 19.5 | 1123.5 | 42.3  | -3.9  |
| Spot 133 | 335 | 23972.2  | 3.2  | 12.1 | 0.6 | 2.4 | 1.6 | 0.2 | 1.4 | 0.91523371  | 1220.5 | 16.0 | 1230.5 | 11.2 | 1248.0 | 12.4  | 2.2   |
| Spot 134 | 235 | 7736.4   | 1.7  | 18.8 | 2.3 | 0.3 | 2.6 | 0.0 | 1.1 | 0.406827685 | 278.8  | 2.9  | 276.1  | 6.3  | 253.4  | 54.8  | -10.0 |
| Spot 135 | 134 | 12254.4  | 2.3  | 9.0  | 0.6 | 4.8 | 1.6 | 0.3 | 1.5 | 0.919963403 | 1774.1 | 22.7 | 1785.7 | 13.4 | 1799.4 | 11.4  | 1.4   |
| Spot 136 | 636 | 33299.7  | 1.7  | 19.0 | 1.0 | 0.3 | 1.7 | 0.0 | 1.4 | 0.815582462 | 281.2  | 3.7  | 282.8  | 4.1  | 296.2  | 22.0  | 5.1   |
| Spot 137 | 54  | 37631.3  | 2.8  | 12.7 | 1.1 | 2.1 | 1.9 | 0.2 | 1.6 | 0.814316643 | 1144.6 | 16.6 | 1145.9 | 13.4 | 1148.4 | 22.5  | 0.3   |
| Spot 140 | 253 | 35108.1  | 3.4  | 12.8 | 0.9 | 2.1 | 1.9 | 0.2 | 1.6 | 0.875969658 | 1141.1 | 17.2 | 1138.7 | 12.9 | 1134.1 | 18.1  | -0.6  |
| Spot 141 | 579 | 4472.1   | 1.9  | 17.4 | 1.9 | 0.2 | 2.8 | 0.0 | 2.0 | 0.722699872 | 180.0  | 3.6  | 194.3  | 4.9  | 371.5  | 43.4  | 51.6  |
| Spot 143 | 183 | 36306.9  | 3.2  | 14.1 | 0.9 | 1.5 | 1.5 | 0.2 | 1.3 | 0.826146976 | 915.9  | 10.9 | 924.5  | 9.4  | 944.9  | 17.8  | 3.1   |
| Spot 144 | 232 | 3385.0   | 1.7  | 19.6 | 1.2 | 0.3 | 2.2 | 0.0 | 1.2 | 0.55291087  | 271.1  | 3.2  | 248.0  | 4.9  | 34.7   | NA    | ####  |
| Spot 146 | 157 | 20927.2  | 2.0  | 16.1 | 1.1 | 0.9 | 1.7 | 0.1 | 1.2 | 0.7206247   | 630.6  | 7.3  | 636.7  | 8.0  | 658.2  | 25.2  | 4.2   |
| Spot 147 | 291 | 75935.9  | 2.6  | 13.1 | 4.4 | 1.0 | 5.5 | 0.1 | 3.2 | 0.586485397 | 590.4  | 18.2 | 708.9  | 28.0 | 1104.7 | 88.9  | 46.6  |
| Spot 148 | 203 | 35207.7  | 0.7  | 8.6  | 0.7 | 5.4 | 1.2 | 0.3 | 1.0 | 0.802272841 | 1857.8 | 15.8 | 1877.0 | 10.4 | 1898.3 | 13.1  | 2.1   |
| Spot 149 | 436 | 97997.1  | 2.9  | 12.2 | 0.8 | 2.3 | 1.3 | 0.2 | 1.0 | 0.801986942 | 1208.6 | 11.5 | 1221.4 | 9.2  | 1244.1 | 15.2  | 2.9   |

|          |      |          |      |      |     |     |     |     |     |             |        |      |        |      |        |      |       |
|----------|------|----------|------|------|-----|-----|-----|-----|-----|-------------|--------|------|--------|------|--------|------|-------|
| Spot 150 | 670  | 695766.4 | 1.1  | 19.0 | 1.5 | 0.3 | 2.2 | 0.0 | 1.6 | 0.741682386 | 277.3  | 4.4  | 281.0  | 5.4  | 311.7  | 33.6 | 11.0  |
| Spot 151 | 575  | 37797.1  | 1.4  | 19.3 | 1.0 | 0.3 | 2.0 | 0.0 | 1.7 | 0.866770978 | 265.8  | 4.4  | 265.0  | 4.6  | 257.9  | 22.4 | -3.1  |
| Spot 152 | 107  | 8968.4   | 1.4  | 16.5 | 1.7 | 0.7 | 3.3 | 0.1 | 2.8 | 0.834683305 | 528.4  | 14.0 | 536.1  | 13.8 | 569.1  | 39.6 | 7.1   |
| Spot 154 | 1237 | 16661.6  | 0.8  | 19.5 | 1.0 | 0.3 | 1.8 | 0.0 | 1.4 | 0.818501657 | 252.0  | 3.6  | 248.3  | 3.9  | 214.0  | 23.4 | -17.7 |
| Spot 156 | 236  | 8185.6   | 1.5  | 19.2 | 2.4 | 0.2 | 3.1 | 0.0 | 1.9 | 0.604705425 | 156.3  | 2.9  | 159.1  | 4.5  | 201.2  | 56.7 | 22.3  |
| Spot 157 | 55   | 9184.6   | 1.6  | 13.9 | 1.1 | 1.4 | 2.2 | 0.1 | 1.8 | 0.853315623 | 877.7  | 15.2 | 894.9  | 12.9 | 937.7  | 23.1 | 6.4   |
| Spot 158 | 1017 | 62034.6  | 3.7  | 19.5 | 0.8 | 0.3 | 1.4 | 0.0 | 1.1 | 0.813460825 | 231.5  | 2.6  | 231.9  | 2.9  | 235.3  | 18.8 | 1.6   |
| Spot 159 | 740  | 18847.0  | 0.8  | 18.3 | 0.9 | 0.4 | 1.8 | 0.1 | 1.6 | 0.863153046 | 371.6  | 5.6  | 370.7  | 5.6  | 364.6  | 20.6 | -1.9  |
| Spot 160 | 150  | 9360.6   | 2.6  | 12.8 | 0.9 | 2.1 | 1.5 | 0.2 | 1.2 | 0.809908222 | 1150.2 | 12.7 | 1133.4 | 10.2 | 1101.2 | 17.5 | -4.5  |
| Spot 161 | 409  | 35850.2  | 5.5  | 14.2 | 0.6 | 1.4 | 1.4 | 0.1 | 1.3 | 0.900164527 | 865.1  | 10.3 | 880.4  | 8.3  | 919.3  | 12.7 | 5.9   |
| Spot 162 | 267  | 6283.4   | 1.9  | 13.2 | 4.4 | 0.4 | 4.7 | 0.0 | 1.7 | 0.363356671 | 273.7  | 4.6  | 370.0  | 14.6 | 1028.6 | 88.5 | 73.4  |
| Spot 163 | 273  | 42898.1  | 7.7  | 13.7 | 1.1 | 1.6 | 1.8 | 0.2 | 1.5 | 0.804636625 | 978.4  | 13.5 | 983.0  | 11.6 | 993.4  | 22.2 | 1.5   |
| Spot 164 | 42   | 19396.7  | 4.0  | 12.2 | 2.0 | 2.2 | 3.0 | 0.2 | 2.2 | 0.745460931 | 1159.8 | 23.4 | 1183.6 | 20.6 | 1227.5 | 38.6 | 5.5   |
| Spot 165 | 397  | 34480.1  | 1.1  | 19.0 | 1.3 | 0.3 | 1.9 | 0.0 | 1.3 | 0.708279224 | 255.4  | 3.3  | 257.9  | 4.2  | 280.7  | 30.1 | 9.0   |
| Spot 166 | 46   | 1784.5   | 2.2  | 16.1 | 3.6 | 0.7 | 5.4 | 0.1 | 4.0 | 0.747208934 | 551.1  | 21.3 | 515.3  | 21.8 | 359.3  | 80.8 | -53.4 |
| Spot 167 | 220  | 71009.4  | 2.3  | 14.2 | 1.0 | 1.5 | 1.4 | 0.2 | 1.1 | 0.740235821 | 953.5  | 9.4  | 946.6  | 8.8  | 930.6  | 19.7 | -2.5  |
| Spot 168 | 279  | 5194.7   | 1.8  | 18.7 | 1.5 | 0.3 | 2.1 | 0.0 | 1.3 | 0.615197789 | 264.2  | 3.4  | 260.1  | 4.9  | 223.2  | 39.0 | -18.4 |
| Spot 170 | 63   | 1249.8   | 2.1  | 18.1 | 3.9 | 0.3 | 7.1 | 0.0 | 2.8 | 0.400623353 | 275.2  | 7.6  | 235.3  | 14.8 | NA     | NA   |       |
| Spot 171 | 422  | 72623.4  | 9.6  | 8.9  | 1.1 | 4.8 | 1.8 | 0.3 | 1.5 | 0.804037951 | 1722.4 | 22.1 | 1776.3 | 15.2 | 1840.2 | 19.5 | 6.4   |
| Spot 172 | 435  | 405628.0 | 12.7 | 12.6 | 0.9 | 2.2 | 1.6 | 0.2 | 1.4 | 0.833619925 | 1170.0 | 14.5 | 1172.3 | 11.3 | 1176.4 | 17.7 | 0.5   |
| Spot 173 | 1545 | 35198.9  | 4.6  | 12.1 | 1.0 | 2.1 | 1.5 | 0.2 | 1.1 | 0.7330992   | 1091.5 | 10.7 | 1144.9 | 10.0 | 1247.4 | 19.4 | 12.5  |
| Spot 175 | 91   | 11429.0  | 2.4  | 18.5 | 2.2 | 0.3 | 2.7 | 0.0 | 1.6 | 0.593035282 | 264.4  | 4.1  | 269.6  | 6.4  | 315.5  | 49.4 | 16.2  |
| Spot 177 | 273  | 31247.1  | 2.2  | 16.5 | 1.5 | 0.7 | 2.5 | 0.1 | 2.0 | 0.806058546 | 548.4  | 10.7 | 560.4  | 10.9 | 609.2  | 32.3 | 10.0  |
| Spot 178 | 180  | 13198.6  | 1.1  | 17.4 | 2.2 | 0.3 | 2.6 | 0.0 | 1.4 | 0.526006959 | 264.6  | 3.5  | 285.9  | 6.5  | 463.8  | 49.1 | 43.0  |
| Spot 179 | 126  | 789.8    | 1.9  | 19.7 | 3.8 | 0.1 | 5.5 | 0.0 | 3.7 | 0.663398381 | 125.3  | 4.5  | 83.4   | 4.4  | NA     | NA   |       |
| Spot 181 | 635  | 33620.1  | 5.2  | 19.4 | 1.4 | 0.3 | 2.2 | 0.0 | 1.6 | 0.762298932 | 241.5  | 3.9  | 241.4  | 4.6  | 240.5  | 32.1 | -0.4  |
| Spot 182 | 664  | 88040.8  | 0.9  | 17.6 | 1.0 | 0.5 | 1.8 | 0.1 | 1.5 | 0.838333212 | 410.9  | 6.0  | 421.4  | 6.2  | 479.3  | 21.6 | 14.3  |
| Spot 184 | 186  | 35555.9  | 2.6  | 13.3 | 0.9 | 1.7 | 1.7 | 0.2 | 1.4 | 0.856679656 | 1009.1 | 13.5 | 1025.6 | 10.9 | 1060.9 | 17.5 | 4.9   |
| Spot 186 | 249  | 10263.6  | 11.1 | 17.1 | 1.2 | 0.6 | 2.5 | 0.1 | 2.2 | 0.871521053 | 503.1  | 10.5 | 501.9  | 9.9  | 496.3  | 27.0 | -1.4  |
| Spot 187 | 639  | 35577.8  | 9.3  | 16.8 | 1.2 | 0.6 | 1.9 | 0.1 | 1.4 | 0.752288722 | 488.7  | 6.7  | 502.5  | 7.5  | 565.6  | 27.2 | 13.6  |
| Spot 189 | 450  | 16005.0  | 6.1  | 17.8 | 0.9 | 0.4 | 1.5 | 0.1 | 1.2 | 0.772901508 | 341.7  | 3.9  | 353.1  | 4.5  | 428.7  | 21.3 | 20.3  |
| Spot 190 | 384  | 12702.7  | 1.4  | 19.1 | 1.0 | 0.3 | 2.1 | 0.0 | 1.8 | 0.871621133 | 304.8  | 5.4  | 298.9  | 5.4  | 253.4  | 23.3 | -20.3 |
| Spot 191 | 186  | 3440.3   | 2.3  | 18.0 | 2.8 | 0.3 | 4.1 | 0.0 | 1.8 | 0.440218665 | 286.5  | 5.1  | 283.5  | 10.2 | 258.5  | 84.7 | -10.8 |
| Spot 192 | 484  | 33296.2  | 2.0  | 10.2 | 1.0 | 3.4 | 2.2 | 0.3 | 2.0 | 0.892403159 | 1461.7 | 25.6 | 1513.1 | 17.3 | 1585.9 | 18.5 | 7.8   |
| Spot 193 | 307  | 7098.0   | 2.3  | 11.0 | 1.4 | 2.4 | 1.8 | 0.2 | 1.2 | 0.655367514 | 1150.1 | 12.7 | 1242.0 | 13.2 | 1405.1 | 26.6 | 18.1  |
| Spot 194 | 122  | 7397.9   | 1.5  | 10.3 | 1.0 | 3.6 | 1.6 | 0.3 | 1.3 | 0.804261733 | 1572.2 | 18.4 | 1559.0 | 13.1 | 1541.1 | 18.3 | -2.0  |
| Spot 195 | 236  | 8657.5   | 2.2  | 20.2 | 2.3 | 0.2 | 3.3 | 0.0 | 2.3 | 0.695571311 | 163.1  | 3.7  | 158.9  | 4.8  | 97.0   | 55.4 | -68.2 |
| Spot 196 | 877  | 46733.6  | 16.6 | 13.9 | 0.7 | 1.6 | 1.4 | 0.2 | 1.2 | 0.883626976 | 989.9  | 11.4 | 987.8  | 8.9  | 983.3  | 13.4 | -0.7  |
| Spot 197 | 744  | 42921.6  | 3.4  | 11.1 | 1.1 | 2.7 | 2.2 | 0.2 | 1.9 | 0.86239266  | 1268.2 | 21.9 | 1325.7 | 16.4 | 1419.8 | 21.4 | 10.7  |
| Spot 198 | 303  | 25892.2  | 19.1 | 12.3 | 0.7 | 2.3 | 1.7 | 0.2 | 1.6 | 0.907062628 | 1185.3 | 16.9 | 1197.0 | 12.1 | 1218.1 | 14.2 | 2.7   |
| Spot 199 | 373  | 4494.4   | 2.2  | 18.1 | 2.3 | 0.2 | 3.1 | 0.0 | 1.9 | 0.619285981 | 153.8  | 2.9  | 162.3  | 4.6  | 287.9  | 55.1 | 46.6  |
| Spot 200 | 473  | 757253.3 | 18.4 | 9.9  | 0.8 | 3.6 | 2.0 | 0.3 | 1.8 | 0.905870916 | 1471.6 | 23.7 | 1549.9 | 15.8 | 1658.4 | 15.6 | 11.3  |
| Spot 201 | 125  | 17115.4  | 3.3  | 11.6 | 1.2 | 2.8 | 1.9 | 0.2 | 1.5 | 0.776030322 | 1353.4 | 17.7 | 1343.7 | 13.9 | 1328.2 | 22.8 | -1.9  |

|          |      |           |      |      |     |     |     |     |     |             |        |      |        |      |        |       |       |
|----------|------|-----------|------|------|-----|-----|-----|-----|-----|-------------|--------|------|--------|------|--------|-------|-------|
| Spot 202 | 243  | 6651.1    | 5.5  | 19.9 | 1.5 | 0.3 | 2.3 | 0.0 | 1.6 | 0.724438948 | 241.0  | 3.9  | 228.7  | 4.6  | 103.6  | 36.8  | ####  |
| Spot 203 | 262  | 3715.4    | 2.5  | 19.4 | 4.6 | 0.1 | 5.6 | 0.0 | 3.2 | 0.567636903 | 69.6   | 2.2  | 70.2   | 3.8  | 92.8   | NA    | 25.1  |
| Spot 204 | 454  | 17173.0   | 1.9  | 19.6 | 1.3 | 0.3 | 2.1 | 0.0 | 1.6 | 0.767886029 | 254.6  | 4.1  | 250.4  | 4.8  | 211.5  | 31.8  | -20.4 |
| Spot 205 | 93   | 3498.9    | 1.6  | 17.4 | 4.0 | 0.2 | 5.0 | 0.0 | 2.9 | 0.573867046 | 169.7  | 4.8  | 182.3  | 8.3  | 349.0  | 92.0  | 51.4  |
| Spot 206 | 40   | 4899.1    | 3.0  | 11.6 | 2.0 | 2.0 | 3.1 | 0.2 | 2.1 | 0.677029684 | 1029.0 | 19.8 | 1113.6 | 20.8 | 1282.6 | 44.0  | 19.8  |
| Spot 207 | 512  | 59434.7   | 0.6  | 11.9 | 0.7 | 2.5 | 1.6 | 0.2 | 1.4 | 0.885214202 | 1257.4 | 15.7 | 1273.4 | 11.3 | 1300.3 | 14.1  | 3.3   |
| Spot 209 | 908  | 205226.8  | 29.4 | 13.2 | 0.9 | 1.9 | 1.5 | 0.2 | 1.2 | 0.817474021 | 1065.4 | 12.3 | 1078.7 | 10.2 | 1105.8 | 17.6  | 3.6   |
| Spot 210 | 170  | 11241.9   | 2.9  | 16.5 | 2.3 | 0.7 | 3.2 | 0.1 | 2.2 | 0.672586738 | 559.5  | 11.6 | 564.9  | 13.9 | 586.4  | 51.7  | 4.6   |
| Spot 211 | 315  | 2636.3    | 0.7  | 19.3 | 1.4 | 0.3 | 1.9 | 0.0 | 1.3 | 0.676041169 | 252.5  | 3.2  | 231.0  | 3.9  | 17.4   | NA    | ####  |
| Spot 213 | 38   | 3034.3    | 5.7  | 14.1 | 2.3 | 1.2 | 5.3 | 0.1 | 3.2 | 0.598262813 | 823.4  | 24.5 | 821.8  | 29.9 | 817.4  | 88.8  | -0.7  |
| Spot 214 | 344  | 19818.2   | 4.7  | 11.9 | 1.1 | 2.3 | 1.9 | 0.2 | 1.5 | 0.797521568 | 1192.2 | 16.2 | 1224.4 | 13.3 | 1281.5 | 21.9  | 7.0   |
| Spot 215 | 178  | 4440.1    | 1.9  | 19.6 | 2.7 | 0.2 | 3.6 | 0.0 | 2.4 | 0.666846196 | 195.8  | 4.7  | 189.0  | 6.3  | 104.4  | 64.0  | -87.6 |
| Spot 217 | 107  | 386449.5  | 1.8  | 14.0 | 1.4 | 1.5 | 1.8 | 0.2 | 1.3 | 0.678699983 | 911.3  | 10.6 | 933.9  | 11.2 | 987.6  | 27.5  | 7.7   |
| Spot 218 | 575  | 2673057.3 | 1.6  | 19.1 | 1.2 | 0.3 | 1.8 | 0.0 | 1.3 | 0.753042844 | 259.0  | 3.4  | 265.5  | 4.1  | 323.2  | 26.2  | 19.9  |
| Spot 219 | 228  | 7915.6    | 1.3  | 19.7 | 1.9 | 0.3 | 3.5 | 0.0 | 3.0 | 0.836858753 | 293.5  | 8.5  | 280.1  | 8.7  | 169.5  | 45.4  | -73.1 |
| Spot 220 | 372  | 22387.3   | 2.7  | 12.6 | 1.0 | 2.1 | 1.7 | 0.2 | 1.4 | 0.806623524 | 1146.3 | 14.6 | 1159.8 | 11.9 | 1185.0 | 20.2  | 3.3   |
| Spot 221 | 188  | 800987.8  | 1.6  | 6.2  | 0.7 | 9.5 | 1.6 | 0.4 | 1.5 | 0.900682631 | 2293.5 | 28.2 | 2391.7 | 14.9 | 2476.4 | 11.9  | 7.4   |
| Spot 222 | 60   | 30875.5   | 1.5  | 14.4 | 1.3 | 1.4 | 2.9 | 0.1 | 2.6 | 0.886676677 | 865.3  | 20.9 | 880.1  | 17.1 | 917.5  | 27.7  | 5.7   |
| Spot 223 | 344  | 22183.8   | 1.4  | 13.6 | 1.1 | 1.5 | 2.1 | 0.1 | 1.8 | 0.845996331 | 867.7  | 14.6 | 913.0  | 12.8 | 1024.2 | 22.9  | 15.3  |
| Spot 224 | 621  | 7500.3    | 1.2  | 19.2 | 1.3 | 0.2 | 2.1 | 0.0 | 1.5 | 0.746766159 | 221.4  | 3.3  | 221.7  | 4.1  | 225.0  | 31.6  | 1.6   |
| Spot 225 | 1608 | 86886.5   | 4.1  | 18.4 | 0.9 | 0.4 | 1.5 | 0.1 | 1.3 | 0.816481514 | 363.3  | 4.4  | 368.7  | 4.7  | 403.3  | 19.8  | 9.9   |
| Spot 226 | 132  | 16014.8   | 1.9  | 18.3 | 2.0 | 0.4 | 2.9 | 0.1 | 2.1 | 0.717045916 | 337.8  | 6.8  | 343.8  | 8.4  | 384.6  | 44.9  | 12.2  |
| Spot 227 | 115  | 64546.6   | 3.5  | 14.1 | 1.2 | 1.6 | 2.3 | 0.2 | 1.9 | 0.84992572  | 954.6  | 17.1 | 957.9  | 14.1 | 965.6  | 24.5  | 1.1   |
| Spot 228 | 601  | 25374.0   | 2.9  | 13.9 | 0.9 | 1.0 | 2.3 | 0.1 | 2.1 | 0.924236359 | 617.4  | 12.4 | 702.7  | 11.6 | 986.3  | 17.7  | 37.4  |
| Spot 229 | 921  | 68611.8   | 1.3  | 19.5 | 1.6 | 0.3 | 3.9 | 0.0 | 3.5 | 0.908608454 | 232.8  | 8.1  | 236.0  | 8.2  | 267.7  | 37.2  | 13.0  |
| Spot 230 | 152  | 69940.9   | 3.3  | 12.1 | 1.0 | 2.4 | 1.6 | 0.2 | 1.3 | 0.790134766 | 1227.4 | 14.4 | 1242.8 | 11.7 | 1269.5 | 19.5  | 3.3   |
| Spot 231 | 844  | 6146.6    | 2.3  | 19.5 | 0.9 | 0.3 | 1.8 | 0.0 | 1.6 | 0.878376061 | 257.2  | 4.0  | 248.7  | 4.0  | 168.9  | 20.3  | -52.2 |
| Spot 232 | 315  | 5919.3    | 2.0  | 17.7 | 1.3 | 0.5 | 1.8 | 0.1 | 1.3 | 0.704496158 | 456.1  | 5.5  | 444.9  | 6.4  | 387.3  | 28.5  | -17.7 |
| Spot 233 | 147  | 13682.6   | 3.6  | 11.9 | 0.9 | 2.5 | 1.9 | 0.2 | 1.6 | 0.862816818 | 1259.5 | 18.7 | 1270.6 | 13.7 | 1289.2 | 18.6  | 2.3   |
| Spot 235 | 168  | 3528.7    | 0.8  | 19.8 | 2.2 | 0.2 | 2.9 | 0.0 | 1.8 | 0.602079603 | 177.9  | 3.1  | 168.1  | 4.5  | 32.3   | NA    | ####  |
| Spot 237 | 337  | 23214.8   | 8.3  | 18.8 | 2.2 | 0.3 | 2.7 | 0.0 | 1.4 | 0.536638061 | 232.8  | 3.3  | 242.3  | 5.7  | 335.3  | 50.8  | 30.6  |
| Spot 238 | 1289 | 45910.0   | 46.1 | 13.4 | 0.8 | 1.7 | 1.5 | 0.2 | 1.3 | 0.840124923 | 999.8  | 11.7 | 1024.0 | 9.7  | 1075.9 | 16.3  | 7.1   |
| Spot 239 | 97   | 7234.8    | 2.8  | 14.4 | 1.6 | 1.4 | 2.5 | 0.2 | 1.6 | 0.632050349 | 901.4  | 13.5 | 892.8  | 15.1 | 871.4  | 40.8  | -3.4  |
| Spot 240 | 788  | 35168.6   | 2.4  | 11.5 | 1.1 | 2.6 | 2.3 | 0.2 | 2.0 | 0.871085418 | 1284.2 | 22.9 | 1314.2 | 16.7 | 1363.5 | 21.4  | 5.8   |
| Spot 241 | 214  | 33143.7   | 6.5  | 13.0 | 1.1 | 2.0 | 2.0 | 0.2 | 1.7 | 0.844771963 | 1116.5 | 17.1 | 1118.6 | 13.4 | 1122.6 | 21.1  | 0.5   |
| Spot 242 | 695  | 32129.2   | 2.2  | 18.5 | 1.8 | 0.4 | 2.1 | 0.0 | 1.2 | 0.5704771   | 304.7  | 3.6  | 314.1  | 5.8  | 384.3  | 39.6  | 20.7  |
| Spot 244 | 1078 | 199416.2  | 2.8  | 14.0 | 0.9 | 1.7 | 1.5 | 0.2 | 1.3 | 0.828659031 | 1016.6 | 11.9 | 1006.5 | 9.7  | 984.7  | 17.3  | -3.2  |
| Spot 245 | 622  | 346652.7  | 4.5  | 12.7 | 0.7 | 2.0 | 1.6 | 0.2 | 1.4 | 0.897500971 | 1076.5 | 14.2 | 1113.8 | 10.8 | 1187.4 | 13.9  | 9.3   |
| Spot 247 | 174  | 39723.0   | 1.6  | 17.4 | 3.3 | 0.3 | 5.4 | 0.0 | 4.2 | 0.786123604 | 261.3  | 10.9 | 288.6  | 13.6 | 516.0  | 73.3  | 49.4  |
| Spot 248 | 63   | 4133.6    | 3.9  | 16.8 | 3.1 | 0.5 | 4.7 | 0.1 | 3.1 | 0.665560712 | 424.4  | 12.9 | 431.2  | 16.6 | 467.3  | 78.0  | 9.2   |
| Spot 249 | 441  | 41509.7   | 4.7  | 8.4  | 0.9 | 5.2 | 1.9 | 0.3 | 1.7 | 0.883730965 | 1776.7 | 26.2 | 1858.8 | 16.3 | 1951.8 | 16.0  | 9.0   |
| Spot 250 | 246  | 3874.1    | 0.6  | 19.3 | 2.2 | 0.2 | 5.1 | 0.0 | 2.3 | 0.454909234 | 178.4  | 4.1  | 174.4  | 8.2  | 120.7  | 106.9 | -47.8 |
| Spot 251 | 65   | 33642.7   | 2.0  | 7.6  | 1.1 | 6.7 | 2.5 | 0.4 | 2.3 | 0.896053092 | 2008.3 | 39.4 | 2066.1 | 22.5 | 2124.2 | 19.8  | 5.5   |

|          |      |          |      |      |     |     |     |     |     |             |        |      |        |      |        |      |       |
|----------|------|----------|------|------|-----|-----|-----|-----|-----|-------------|--------|------|--------|------|--------|------|-------|
| Spot 253 | 1155 | 33158.9  | 77.7 | 19.4 | 1.1 | 0.3 | 1.8 | 0.0 | 1.4 | 0.795973806 | 239.3  | 3.3  | 241.3  | 3.8  | 261.4  | 24.5 | 8.5   |
| Spot 254 | 278  | 17170.9  | 2.8  | 12.3 | 1.0 | 2.2 | 1.7 | 0.2 | 1.4 | 0.814746678 | 1180.7 | 14.9 | 1196.5 | 11.9 | 1225.1 | 19.3 | 3.6   |
| Spot 255 | 459  | 256951.8 | 1.8  | 11.1 | 1.1 | 3.0 | 1.8 | 0.2 | 1.4 | 0.783061335 | 1396.6 | 17.4 | 1412.8 | 13.5 | 1437.3 | 21.0 | 2.8   |
| Spot 256 | 607  | 413705.7 | 8.7  | 13.6 | 1.0 | 1.7 | 2.0 | 0.2 | 1.7 | 0.850051806 | 980.5  | 15.2 | 996.3  | 12.5 | 1031.4 | 21.0 | 4.9   |
| Spot 257 | 408  | 35286.5  | 6.1  | 11.1 | 1.0 | 3.1 | 1.9 | 0.2 | 1.6 | 0.859642241 | 1438.5 | 21.0 | 1437.9 | 14.6 | 1437.0 | 18.4 | -0.1  |
| Spot 258 | 160  | 19537.0  | 5.2  | 13.8 | 1.1 | 1.6 | 2.2 | 0.2 | 2.0 | 0.872582263 | 979.1  | 17.8 | 980.5  | 14.1 | 983.5  | 22.3 | 0.4   |
| Spot 261 | 275  | 14776.3  | 1.6  | 17.9 | 2.1 | 0.3 | 2.7 | 0.0 | 1.7 | 0.633509759 | 271.1  | 4.6  | 286.4  | 6.8  | 413.3  | 47.0 | 34.4  |
| Spot 262 | 189  | 14074.4  | 4.1  | 12.6 | 1.0 | 2.1 | 1.7 | 0.2 | 1.4 | 0.795955237 | 1134.9 | 14.2 | 1143.8 | 11.8 | 1160.7 | 20.6 | 2.2   |
| Spot 263 | 485  | 35504.4  | 9.3  | 19.4 | 1.3 | 0.3 | 2.1 | 0.0 | 1.7 | 0.808798145 | 229.1  | 3.9  | 232.0  | 4.4  | 260.8  | 28.8 | 12.2  |
| Spot 264 | 181  | 20076.6  | 5.1  | 10.7 | 1.5 | 3.2 | 2.2 | 0.2 | 1.6 | 0.716157065 | 1426.6 | 20.2 | 1452.7 | 17.1 | 1491.1 | 29.2 | 4.3   |
| Spot 265 | 114  | 35610.7  | 9.8  | 13.0 | 1.0 | 2.0 | 1.8 | 0.2 | 1.4 | 0.813301092 | 1125.7 | 14.8 | 1124.0 | 12.0 | 1120.7 | 20.5 | -0.4  |
| Spot 266 | 1110 | 30015.6  | 1.0  | 17.1 | 1.2 | 0.4 | 4.2 | 0.1 | 4.0 | 0.957673122 | 334.4  | 13.1 | 361.0  | 12.7 | 535.6  | 26.4 | 37.6  |
| Spot 267 | 288  | 7640.8   | 1.9  | 20.1 | 2.0 | 0.2 | 3.0 | 0.0 | 1.8 | 0.602946044 | 235.7  | 4.2  | 223.3  | 6.0  | 94.8   | 57.0 | ####  |
| Spot 268 | 53   | 16246.6  | 0.9  | 12.7 | 1.9 | 2.1 | 2.7 | 0.2 | 2.0 | 0.717489619 | 1149.6 | 20.7 | 1148.4 | 18.8 | 1146.0 | 37.9 | -0.3  |
| Spot 269 | 229  | 11515.3  | 2.6  | 17.2 | 1.1 | 0.6 | 1.7 | 0.1 | 1.2 | 0.691067115 | 490.2  | 5.6  | 491.0  | 6.6  | 494.6  | 27.2 | 0.9   |
| Spot 275 | 167  | 53994.8  | 2.9  | 12.6 | 1.4 | 2.2 | 1.9 | 0.2 | 1.3 | 0.6744345   | 1178.8 | 14.2 | 1180.4 | 13.6 | 1183.2 | 28.4 | 0.4   |
| Spot 276 | 531  | 7311.6   | 9.7  | 19.1 | 1.2 | 0.3 | 1.9 | 0.0 | 1.4 | 0.755160983 | 271.0  | 3.8  | 266.3  | 4.4  | 225.1  | 28.4 | -20.4 |
| Spot 277 | 1444 | 17717.0  | 0.7  | 20.3 | 1.4 | 0.2 | 2.3 | 0.0 | 1.7 | 0.749536541 | 153.3  | 2.6  | 152.3  | 3.2  | 136.4  | 35.2 | -12.4 |
| Spot 278 | 243  | 40988.6  | 2.1  | 10.5 | 0.8 | 3.5 | 1.7 | 0.3 | 1.5 | 0.872155488 | 1502.2 | 20.0 | 1516.1 | 13.5 | 1535.6 | 15.8 | 2.2   |
| Spot 279 | 371  | 43435.1  | 2.3  | 17.4 | 0.9 | 0.7 | 2.0 | 0.1 | 1.8 | 0.893520696 | 518.8  | 9.1  | 517.2  | 8.3  | 510.0  | 20.2 | -1.7  |
| Spot 280 | 962  | 4790.6   | 1.4  | 18.2 | 2.5 | 0.2 | 4.0 | 0.0 | 2.6 | 0.64295427  | 152.9  | 3.9  | 161.8  | 6.1  | 294.8  | 70.8 | 48.1  |
| Spot 281 | 450  | 43098.9  | 3.9  | 12.3 | 5.0 | 0.7 | 5.8 | 0.1 | 2.9 | 0.498582288 | 402.2  | 11.3 | 551.5  | 24.7 | 1227.9 | 98.8 | 67.2  |
| Spot 282 | 602  | 38460.2  | 5.7  | 12.3 | 0.7 | 2.1 | 1.7 | 0.2 | 1.5 | 0.915705991 | 1121.0 | 15.8 | 1161.0 | 11.6 | 1236.4 | 13.2 | 9.3   |
| Spot 283 | 689  | 679155.5 | 2.3  | 11.8 | 0.8 | 2.6 | 1.9 | 0.2 | 1.7 | 0.915308667 | 1277.0 | 20.2 | 1292.3 | 13.9 | 1317.7 | 14.9 | 3.1   |
| Spot 285 | 132  | 16221.1  | 1.0  | 16.9 | 1.3 | 0.8 | 2.0 | 0.1 | 1.3 | 0.678336528 | 598.3  | 7.6  | 588.8  | 8.8  | 552.4  | 31.4 | -8.3  |
| Spot 286 | 341  | 6171.0   | 9.3  | 17.0 | 1.2 | 0.7 | 2.4 | 0.1 | 2.1 | 0.877021782 | 533.7  | 10.9 | 525.0  | 9.9  | 487.1  | 25.7 | -9.6  |
| Spot 287 | 354  | 38171.7  | 2.4  | 17.5 | 1.4 | 0.5 | 1.9 | 0.1 | 1.3 | 0.661875795 | 401.9  | 5.0  | 416.3  | 6.6  | 497.0  | 31.8 | 19.1  |
| Spot 288 | 1195 | 57913.7  | 5.8  | 14.2 | 0.7 | 1.6 | 1.4 | 0.2 | 1.2 | 0.864402488 | 987.4  | 11.4 | 974.4  | 9.0  | 945.0  | 14.8 | -4.5  |
| Spot 289 | 641  | 46074.5  | 2.2  | 13.7 | 0.6 | 1.6 | 1.5 | 0.2 | 1.3 | 0.905695265 | 963.4  | 12.1 | 982.1  | 9.4  | 1024.2 | 12.8 | 5.9   |
| Spot 290 | 400  | 4856.1   | 1.1  | 18.6 | 1.4 | 0.3 | 2.2 | 0.0 | 1.6 | 0.710588162 | 259.5  | 4.0  | 258.1  | 5.0  | 245.5  | 35.5 | -5.7  |
| Spot 291 | 66   | 11869.6  | 3.6  | 12.6 | 1.3 | 2.0 | 1.9 | 0.2 | 1.4 | 0.711800851 | 1101.3 | 13.8 | 1122.1 | 13.0 | 1162.6 | 26.6 | 5.3   |
| Spot 292 | 351  | 40622.1  | 4.9  | 12.2 | 0.7 | 2.4 | 1.6 | 0.2 | 1.5 | 0.892069924 | 1240.6 | 16.5 | 1244.7 | 11.7 | 1251.7 | 14.5 | 0.9   |
| Spot 293 | 498  | 10297.9  | 2.8  | 16.0 | 2.8 | 0.4 | 3.2 | 0.0 | 1.6 | 0.49270762  | 261.7  | 4.1  | 305.6  | 8.6  | 655.7  | 60.5 | 60.1  |
| Spot 294 | 113  | 6999.8   | 4.2  | 13.7 | 0.8 | 1.6 | 2.0 | 0.2 | 1.4 | 0.693713903 | 993.8  | 12.7 | 985.4  | 12.5 | 966.5  | 29.1 | -2.8  |
| Spot 295 | 393  | 26722.7  | 4.6  | 12.5 | 0.7 | 2.3 | 1.5 | 0.2 | 1.3 | 0.885742144 | 1225.9 | 14.8 | 1214.0 | 10.6 | 1192.7 | 13.7 | -2.8  |
| Spot 296 | 502  | 74113.8  | 2.3  | 13.2 | 0.8 | 1.7 | 1.7 | 0.2 | 1.5 | 0.891753539 | 966.9  | 13.5 | 1006.5 | 10.8 | 1093.8 | 15.3 | 11.6  |
| Spot 297 | 826  | 73400.6  | 5.6  | 12.0 | 0.8 | 2.6 | 2.2 | 0.2 | 2.0 | 0.93672786  | 1300.0 | 23.9 | 1291.9 | 15.8 | 1278.6 | 14.7 | -1.7  |
| Spot 298 | 368  | 24045.8  | 1.8  | 17.6 | 0.8 | 0.6 | 1.5 | 0.1 | 1.3 | 0.836995258 | 482.4  | 6.0  | 480.3  | 5.9  | 470.3  | 18.7 | -2.6  |
| Spot 299 | 806  | 25079.5  | 3.3  | 19.4 | 1.2 | 0.3 | 1.8 | 0.0 | 1.3 | 0.742732146 | 257.3  | 3.3  | 257.7  | 4.0  | 260.6  | 27.1 | 1.2   |
| Spot 300 | 95   | 8263.9   | 2.8  | 13.4 | 0.8 | 1.8 | 1.4 | 0.2 | 1.1 | 0.770072217 | 1047.0 | 10.2 | 1041.1 | 8.9  | 1028.8 | 17.7 | -1.8  |
| Spot 302 | 638  | 205778.4 | 2.6  | 12.6 | 0.8 | 2.1 | 1.5 | 0.2 | 1.3 | 0.871816739 | 1119.1 | 13.8 | 1144.7 | 10.6 | 1193.6 | 14.9 | 6.2   |
| Spot 303 | 1154 | 106189.8 | 63.2 | 13.1 | 1.0 | 1.7 | 2.0 | 0.2 | 1.7 | 0.866678072 | 956.2  | 15.5 | 1006.6 | 12.9 | 1118.0 | 20.1 | 14.5  |
| Spot 304 | 91   | 9002.7   | 5.2  | 14.3 | 1.4 | 1.4 | 2.1 | 0.2 | 1.2 | 0.589706805 | 905.8  | 10.5 | 900.3  | 12.6 | 886.8  | 35.1 | -2.2  |

|                         |      |          |      |       |      |      |      |     |      |             |        |       |        |       |        |       |       |
|-------------------------|------|----------|------|-------|------|------|------|-----|------|-------------|--------|-------|--------|-------|--------|-------|-------|
| Spot 306                | 153  | 8439.4   | 3.0  | 12.4  | 2.5  | 2.3  | 3.9  | 0.2 | 3.0  | 0.771889993 | 1232.7 | 33.5  | 1219.1 | 27.4  | 1195.2 | 48.5  | -3.1  |
| Spot 307                | 32   | 10521.2  | 1.8  | 17.8  | 5.4  | 0.3  | 6.5  | 0.0 | 3.5  | 0.541089391 | 278.4  | 9.5   | 294.6  | 16.5  | 425.3  | 121.1 | 34.5  |
| Spot 308                | 193  | 26514.1  | 3.4  | 14.4  | 0.9  | 1.5  | 1.4  | 0.2 | 1.0  | 0.76412251  | 925.8  | 9.0   | 924.3  | 8.2   | 920.8  | 18.0  | -0.5  |
| Spot 309                | 42   | 28766.1  | 2.4  | 13.1  | 4.2  | 2.0  | 7.3  | 0.2 | 5.9  | 0.814532183 | 1119.6 | 60.7  | 1113.8 | 49.1  | 1102.4 | 84.2  | -1.6  |
| Spot 312                | 300  | 4180.6   | 1.0  | 19.2  | 1.2  | 0.3  | 2.5  | 0.0 | 1.9  | 0.774758793 | 266.5  | 5.0   | 255.1  | 5.5   | 151.9  | 36.3  | -75.4 |
| Spot 313                | 226  | 6485.9   | 1.8  | 19.5  | 1.4  | 0.3  | 2.3  | 0.0 | 1.8  | 0.781345906 | 284.3  | 5.1   | 272.2  | 5.6   | 170.0  | 33.9  | -67.3 |
| Spot 315                | 319  | 16024.4  | 2.0  | 18.9  | 1.6  | 0.3  | 2.3  | 0.0 | 1.6  | 0.709811503 | 274.7  | 4.4   | 277.7  | 5.6   | 302.8  | 36.9  | 9.3   |
| Run 1 NM8A (discordant) |      |          |      |       |      |      |      |     |      |             |        |       |        |       |        |       |       |
| Spot 107                | 38   | 386.5    | 1.6  | 73.6  | 20.4 | 0.1  | 20.6 | 0.0 | 2.9  | 0.138089608 | 176.5  | 5.0   | 51.5   | 10.4  | NA     | NA    |       |
| Spot 116                | 1406 | 279555.5 | 29.3 | 12.4  | 1.0  | 1.7  | 3.0  | 0.2 | 2.8  | 0.942040912 | 917.2  | 23.9  | 1008.7 | 19.0  | 1213.1 | 19.6  | 24.4  |
| Spot 120                | 15   | 1443.5   | 9.4  | 14.0  | 3.1  | 1.9  | 3.8  | 0.2 | 2.1  | 0.556920323 | 1145.0 | 22.0  | 1084.6 | 25.2  | 965.3  | 64.0  | -18.6 |
| Spot 124                | 20   | 1124.7   | 4.2  | 16.4  | 8.6  | 1.2  | 9.2  | 0.1 | 3.3  | 0.358311434 | 851.4  | 26.2  | 796.0  | 50.6  | 643.8  | 184.3 | -32.3 |
| Spot 129                | 93   | 2728.6   | 1.2  | 11.2  | 4.5  | 2.2  | 4.7  | 0.2 | 1.3  | 0.268121465 | 1050.9 | 12.3  | 1174.2 | 32.8  | 1409.1 | 87.0  | 25.4  |
| Spot 138                | 152  | 27815.8  | 8.7  | 16.7  | 3.1  | 2.1  | 27.3 | 0.3 | 27.1 | 0.993527419 | 1480.3 | 358.8 | 1158.4 | 190.7 | 597.3  | 67.1  | ####  |
| Spot 139                | 151  | 39460.4  | 5.3  | 9.2   | 1.6  | 2.9  | 2.1  | 0.2 | 1.4  | 0.669722027 | 1153.2 | 15.2  | 1392.0 | 16.2  | 1779.4 | 29.0  | 35.2  |
| Spot 14                 | 956  | 49427.5  | 32.9 | 12.5  | 1.1  | 1.8  | 1.9  | 0.2 | 1.6  | 0.825066365 | 961.0  | 14.3  | 1037.7 | 12.6  | 1203.0 | 21.6  | 20.1  |
| Spot 142                | 932  | 29197.3  | 9.8  | 12.8  | 0.9  | 1.4  | 1.8  | 0.1 | 1.5  | 0.85055888  | 799.1  | 11.4  | 897.3  | 10.6  | 1147.6 | 18.6  | 30.4  |
| Spot 145                | 58   | 2313.2   | 2.2  | 33.3  | 3.9  | 0.3  | 30.3 | 0.1 | 30.0 | 0.991639959 | 427.3  | 124.0 | 253.7  | 68.0  | NA     | NA    |       |
| Spot 153                | 91   | 4323.2   | 4.7  | 14.9  | 1.0  | 1.4  | 1.7  | 0.2 | 1.3  | 0.793186844 | 925.0  | 11.3  | 900.6  | 9.9   | 841.1  | 21.0  | -10.0 |
| Spot 155                | 190  | 8894.3   | 3.1  | 14.9  | 1.0  | 1.4  | 1.6  | 0.2 | 1.2  | 0.757929558 | 934.1  | 10.6  | 907.2  | 9.6   | 842.2  | 21.8  | -10.9 |
| Spot 169                | 41   | 2340.8   | 2.7  | 15.7  | 2.1  | 1.3  | 2.9  | 0.1 | 2.0  | 0.685658089 | 899.8  | 16.6  | 851.3  | 16.6  | 727.0  | 44.5  | -23.8 |
| Spot 174                | 157  | 35140.1  | 2.9  | 23.6  | 1.9  | 1.0  | 30.1 | 0.2 | 30.0 | 0.997998819 | 1024.2 | 284.3 | 707.2  | 154.3 | NA     | NA    |       |
| Spot 176                | 607  | 35372.2  | 1.3  | 10.2  | 0.9  | 2.5  | 1.8  | 0.2 | 1.6  | 0.858029536 | 1084.9 | 15.5  | 1264.3 | 13.1  | 1583.8 | 17.4  | 31.5  |
| Spot 180                | 688  | 33681.1  | 9.6  | 12.2  | 0.8  | 2.6  | 2.1  | 0.2 | 1.9  | 0.931410852 | 1321.6 | 23.1  | 1291.0 | 15.2  | 1240.5 | 14.8  | -6.5  |
| Spot 183                | 39   | 462.0    | 1.2  | 43.7  | 21.7 | 0.1  | 22.0 | 0.0 | 3.6  | 0.163329473 | 216.7  | 7.6   | 104.0  | 21.7  | NA     | NA    |       |
| Spot 185                | 145  | 14118.5  | 2.1  | 13.1  | 1.0  | 2.2  | 1.7  | 0.2 | 1.4  | 0.826481657 | 1219.1 | 16.0  | 1176.2 | 12.1  | 1098.1 | 19.6  | -11.0 |
| Spot 188                | 127  | 4360.7   | 1.4  | 24.3  | 2.8  | 0.2  | 18.2 | 0.0 | 18.0 | 0.988146524 | 253.6  | 44.8  | 208.4  | 34.4  | NA     | NA    |       |
| Spot 208                | 64   | 356.1    | 2.2  | 145.9 | 8.5  | 0.0  | 9.4  | 0.0 | 3.8  | 0.410314501 | 166.4  | 6.3   | 24.8   | 2.3   | NA     | NA    |       |
| Spot 21                 | 2371 | 145143.1 | 15.3 | 12.7  | 0.9  | 1.7  | 1.4  | 0.2 | 1.1  | 0.790300174 | 922.3  | 9.5   | 996.4  | 8.8   | 1163.2 | 16.9  | 20.7  |
| Spot 212                | 422  | 13309.9  | 3.8  | 21.3  | 3.7  | 0.1  | 30.2 | 0.0 | 30.0 | 0.992616125 | 86.8   | 25.9  | 85.4   | 24.8  | 45.8   | NA    | -89.6 |
| Spot 216                | 0    | 1000.0   | 0.8  | 5.2   | 1.0  | 26.4 | 1.2  | 1.0 | 0.6  | 0.514146551 | 4445.5 | 19.3  | 3360.9 | 11.4  | 2765.6 | 16.4  | -60.7 |
| Spot 234                | 213  | 9573.9   | 0.7  | 20.5  | 2.7  | 0.2  | 7.2  | 0.0 | 6.6  | 0.928703844 | 200.2  | 13.1  | 195.3  | 12.7  | 137.0  | 62.3  | -46.1 |
| Spot 236                | 162  | 6911.9   | 3.5  | 13.0  | 0.9  | 2.1  | 1.5  | 0.2 | 1.2  | 0.773428252 | 1185.9 | 12.5  | 1164.4 | 10.4  | 1124.5 | 18.9  | -5.5  |
| Spot 243                | 52   | 2427.2   | 3.5  | 14.8  | 2.1  | 1.5  | 2.9  | 0.2 | 2.0  | 0.69974346  | 983.6  | 18.4  | 945.6  | 17.7  | 858.1  | 42.8  | -14.6 |
| Spot 246                | 39   | 5959.2   | 2.2  | 13.1  | 1.6  | 2.1  | 2.2  | 0.2 | 1.4  | 0.656348944 | 1184.8 | 15.4  | 1156.5 | 15.0  | 1103.7 | 32.7  | -7.3  |
| Spot 252                | 892  | 56829.8  | 13.3 | 12.2  | 1.4  | 1.6  | 2.1  | 0.1 | 1.6  | 0.752902823 | 844.0  | 12.3  | 960.9  | 12.8  | 1238.9 | 26.7  | 31.9  |
| Spot 259                | 91   | 2421.0   | 2.0  | 36.8  | 11.8 | 0.2  | 32.2 | 0.1 | 30.0 | 0.930403714 | 343.7  | 100.4 | 189.7  | 55.8  | NA     | NA    |       |
| Spot 260                | 62   | 587.3    | 1.1  | 49.5  | 65.7 | 0.1  | 65.8 | 0.0 | 2.8  | 0.042454548 | 191.1  | 5.3   | 81.6   | 51.6  | NA     | NA    |       |
| Spot 270                | 74   | 2102.5   | 3.2  | 38.1  | 4.3  | 0.2  | 30.3 | 0.1 | 30.0 | 0.99002259  | 377.8  | 110.1 | 200.4  | 55.2  | NA     | NA    |       |
| Spot 271                | 9    | 2627.7   | 3.6  | 14.3  | 7.3  | 1.5  | 10.1 | 0.2 | 7.0  | 0.692353897 | 919.4  | 59.7  | 921.8  | 61.0  | 927.3  | 149.3 | 0.9   |
| Spot 272                | 230  | 9727.8   | 2.0  | 21.6  | 4.0  | 0.1  | 12.8 | 0.0 | 12.1 | 0.949604272 | 79.8   | 9.6   | 77.6   | 9.5   | 10.5   | NA    | ####  |
| Spot 273                | 56   | 2691.3   | 1.4  | 15.7  | 2.6  | 1.2  | 3.1  | 0.1 | 1.5  | 0.504219112 | 840.3  | 12.2  | 812.1  | 17.1  | 735.5  | 56.0  | -14.2 |
| Spot 274                | 754  | 530737.4 | 7.1  | 9.7   | 1.7  | 2.6  | 2.4  | 0.2 | 1.7  | 0.699022827 | 1096.6 | 17.2  | 1310.1 | 18.0  | 1679.0 | 32.3  | 34.7  |

|          |      |          |      |      |     |     |      |     |      |             |        |      |        |      |        |       |       |
|----------|------|----------|------|------|-----|-----|------|-----|------|-------------|--------|------|--------|------|--------|-------|-------|
| Spot 284 | 330  | 5561.9   | 3.1  | 20.0 | 4.8 | 0.1 | 9.2  | 0.0 | 7.8  | 0.854506827 | 78.7   | 6.1  | 82.5   | 7.3  | 193.7  | 110.7 | 59.4  |
| Spot 30  | 53   | 3085.4   | 3.1  | 15.4 | 1.4 | 1.4 | 2.0  | 0.2 | 1.4  | 0.694317809 | 930.8  | 12.0 | 885.5  | 11.8 | 774.0  | 30.1  | -20.3 |
| Spot 301 | 305  | 17665.3  | 12.2 | 13.6 | 0.8 | 1.9 | 1.3  | 0.2 | 1.0  | 0.75665171  | 1094.5 | 9.8  | 1074.6 | 8.6  | 1034.3 | 17.1  | -5.8  |
| Spot 305 | 64   | 2690.8   | 3.7  | 15.1 | 1.5 | 1.4 | 2.3  | 0.2 | 1.7  | 0.744686072 | 911.7  | 14.3 | 883.3  | 13.4 | 812.9  | 31.6  | -12.2 |
| Spot 310 | 52   | 2665.4   | 4.7  | 15.2 | 4.4 | 1.4 | 4.6  | 0.2 | 1.3  | 0.279170871 | 909.4  | 11.0 | 876.9  | 27.2 | 795.7  | 93.2  | -14.3 |
| Spot 311 | 390  | 130966.7 | 5.6  | 12.4 | 1.0 | 2.4 | 2.1  | 0.2 | 1.9  | 0.875769039 | 1279.0 | 21.5 | 1253.7 | 15.3 | 1210.6 | 20.1  | -5.6  |
| Spot 314 | 1122 | 67186.6  | 19.8 | 14.3 | 0.7 | 1.6 | 1.4  | 0.2 | 1.2  | 0.871014821 | 1002.6 | 11.2 | 979.4  | 8.7  | 927.9  | 14.0  | -8.1  |
| Spot 34  | 497  | 10590.7  | 5.2  | 21.2 | 1.9 | 0.3 | 6.7  | 0.0 | 6.4  | 0.960814455 | 248.6  | 15.7 | 230.7  | 13.8 | 52.0   | 44.3  | ####  |
| Spot 4   | 12   | 1411.3   | 3.3  | 15.1 | 8.4 | 1.6 | 9.1  | 0.2 | 3.3  | 0.368179188 | 1062.3 | 32.8 | 982.8  | 57.3 | 809.3  | 177.1 | -31.3 |
| Spot 41  | 31   | 2012.4   | 0.5  | 5.3  | 5.6 | 1.1 | 8.9  | 0.0 | 6.9  | 0.772572503 | 276.5  | 18.5 | 776.6  | 48.2 | 2743.1 | 92.7  | 89.9  |
| Spot 43  | 121  | 2310.9   | 3.5  | 12.1 | 9.3 | 0.2 | 15.4 | 0.0 | 12.3 | 0.798119262 | 111.3  | 13.5 | 184.3  | 25.9 | 1266.8 | 181.3 | 91.2  |
| Spot 47  | 45   | 5029.1   | 2.2  | 13.6 | 4.1 | 2.0 | 5.8  | 0.2 | 4.1  | 0.708924665 | 1179.2 | 44.5 | 1128.4 | 39.7 | 1031.9 | 83.0  | -14.3 |
| Spot 5   | 89   | 6173.3   | 5.0  | 13.1 | 1.1 | 1.5 | 1.7  | 0.1 | 1.3  | 0.762918561 | 857.5  | 10.6 | 927.4  | 10.5 | 1097.4 | 22.3  | 21.9  |
| Spot 52  | 254  | 179317.0 | 3.1  | 8.2  | 0.9 | 4.2 | 2.4  | 0.2 | 2.2  | 0.923158027 | 1431.1 | 28.7 | 1674.7 | 19.9 | 1995.0 | 16.6  | 28.3  |
| Spot 54  | 900  | 302134.2 | 10.9 | 7.9  | 2.7 | 3.4 | 3.2  | 0.2 | 1.7  | 0.534866094 | 1163.9 | 18.3 | 1514.3 | 25.3 | 2045.7 | 48.0  | 43.1  |
| Spot 59  | 237  | 600623.7 | 2.5  | 15.2 | 3.0 | 1.5 | 8.6  | 0.2 | 8.0  | 0.935451297 | 970.1  | 72.2 | 920.3  | 51.9 | 802.5  | 63.5  | -20.9 |
| Spot 74  | 134  | 24963.2  | 1.2  | 18.2 | 3.1 | 0.7 | 12.8 | 0.1 | 12.4 | 0.969843546 | 608.5  | 72.0 | 567.8  | 55.6 | 407.9  | 69.7  | -49.2 |
| Spot 82  | 475  | 35580.2  | 1.4  | 30.3 | 1.5 | 0.2 | 30.0 | 0.0 | 30.0 | 0.998781951 | 269.3  | 79.1 | 180.3  | 49.7 | NA     | NA    |       |
| Spot 91  | 69   | 10198.4  | 3.6  | 14.3 | 1.8 | 1.6 | 2.8  | 0.2 | 2.1  | 0.771302856 | 977.8  | 19.4 | 960.4  | 17.2 | 920.7  | 36.3  | -6.2  |
| Spot 95  | 85   | 3243.3   | 1.8  | 14.0 | 1.0 | 1.8 | 1.6  | 0.2 | 1.3  | 0.805886923 | 1055.0 | 12.8 | 1027.8 | 10.5 | 970.3  | 19.7  | -8.7  |

**Run 2**

|         |      |          |      |      |     |     |     |     |     |             |        |      |        |      |        |       |       |
|---------|------|----------|------|------|-----|-----|-----|-----|-----|-------------|--------|------|--------|------|--------|-------|-------|
| Spot 2  | 489  | 4980.5   | 0.9  | 19.3 | 1.6 | 0.3 | 2.6 | 0.0 | 2.1 | 0.779794433 | 258.8  | 5.2  | 246.6  | 5.8  | 131.3  | 38.9  | -97.1 |
| Spot 3  | 388  | 31585.6  | 3.5  | 12.5 | 1.3 | 2.1 | 2.0 | 0.2 | 1.5 | 0.745129072 | 1145.9 | 15.8 | 1158.9 | 14.0 | 1183.3 | 26.6  | 3.2   |
| Spot 4  | 655  | 7845.2   | 1.1  | 17.0 | 4.6 | 0.1 | 5.5 | 0.0 | 2.7 | 0.485531368 | 69.8   | 1.9  | 82.9   | 4.4  | 479.5  | 106.7 | 85.4  |
| Spot 5  | 430  | 628301.4 | 2.4  | 13.1 | 0.7 | 1.9 | 1.8 | 0.2 | 1.6 | 0.926389511 | 1063.6 | 16.0 | 1076.6 | 11.7 | 1103.1 | 13.2  | 3.6   |
| Spot 6  | 286  | 20255.5  | 2.8  | 16.0 | 4.8 | 0.4 | 6.2 | 0.0 | 4.0 | 0.638786023 | 284.6  | 11.1 | 330.6  | 17.6 | 668.0  | 102.7 | 57.4  |
| Spot 7  | 773  | 79084.6  | 3.2  | 13.0 | 0.8 | 1.8 | 1.8 | 0.2 | 1.6 | 0.892072532 | 1027.5 | 15.0 | 1056.6 | 11.6 | 1117.3 | 15.9  | 8.0   |
| Spot 8  | 169  | 4950.1   | 2.1  | 12.3 | 1.7 | 2.2 | 2.1 | 0.2 | 1.3 | 0.605656981 | 1204.4 | 14.2 | 1186.2 | 15.0 | 1153.2 | 33.8  | -4.4  |
| Spot 9  | 1560 | 128810.6 | 7.5  | 12.6 | 1.1 | 2.1 | 2.3 | 0.2 | 2.0 | 0.870032979 | 1116.4 | 20.5 | 1145.1 | 15.8 | 1200.0 | 22.3  | 7.0   |
| Spot 10 | 459  | 11407.4  | 1.2  | 17.7 | 1.9 | 0.3 | 2.8 | 0.0 | 1.8 | 0.657223114 | 276.1  | 4.9  | 293.5  | 7.0  | 434.0  | 46.3  | 36.4  |
| Spot 11 | 1190 | 24760.0  | 10.6 | 17.8 | 1.1 | 0.4 | 1.8 | 0.0 | 1.4 | 0.796337482 | 299.2  | 4.1  | 317.2  | 4.8  | 451.6  | 23.9  | 33.7  |
| Spot 13 | 268  | 12872.2  | 2.9  | 13.2 | 0.8 | 1.9 | 1.7 | 0.2 | 1.5 | 0.879371792 | 1109.1 | 14.9 | 1096.8 | 11.2 | 1072.5 | 15.9  | -3.4  |
| Spot 14 | 97   | 9264.7   | 2.8  | 12.3 | 3.3 | 2.2 | 4.5 | 0.2 | 3.0 | 0.675546269 | 1168.8 | 32.4 | 1179.6 | 31.3 | 1199.3 | 65.3  | 2.5   |
| Spot 15 | 620  | 9281.2   | 6.4  | 17.1 | 2.2 | 0.6 | 3.4 | 0.1 | 2.6 | 0.767004985 | 483.9  | 12.2 | 486.8  | 13.2 | 500.7  | 48.1  | 3.4   |
| Spot 17 | 664  | 25268.1  | 2.1  | 12.6 | 1.0 | 2.1 | 1.8 | 0.2 | 1.4 | 0.809167994 | 1112.4 | 14.6 | 1135.7 | 12.1 | 1180.6 | 20.5  | 5.8   |
| Spot 19 | 74   | 31678.5  | 2.0  | 14.7 | 3.0 | 1.3 | 4.1 | 0.1 | 2.7 | 0.676348089 | 854.5  | 22.0 | 857.7  | 23.5 | 865.9  | 62.1  | 1.3   |
| Spot 20 | 793  | 34439.3  | 15.9 | 14.0 | 0.8 | 1.5 | 1.4 | 0.2 | 1.2 | 0.82640368  | 907.3  | 9.8  | 928.1  | 8.5  | 977.8  | 16.0  | 7.2   |
| Spot 21 | 584  | 43131.2  | 0.9  | 20.0 | 1.6 | 0.2 | 2.1 | 0.0 | 1.4 | 0.639775782 | 185.9  | 2.5  | 186.9  | 3.7  | 200.2  | 38.2  | 7.1   |
| Spot 22 | 832  | 10525.1  | 3.0  | 18.2 | 1.6 | 0.3 | 2.2 | 0.0 | 1.5 | 0.68722131  | 263.9  | 3.9  | 275.2  | 5.3  | 373.1  | 36.0  | 29.3  |
| Spot 23 | 1071 | 91234.2  | 8.4  | 19.4 | 1.5 | 0.3 | 1.8 | 0.0 | 1.1 | 0.591402128 | 242.9  | 2.6  | 245.6  | 4.0  | 271.8  | 33.8  | 10.6  |
| Spot 24 | 810  | 7237.5   | 5.9  | 19.7 | 1.7 | 0.3 | 3.2 | 0.0 | 1.9 | 0.601849011 | 273.2  | 5.2  | 261.2  | 7.4  | 154.8  | 60.1  | -76.5 |
| Spot 25 | 398  | 18225.0  | 11.4 | 12.9 | 1.0 | 2.0 | 1.6 | 0.2 | 1.3 | 0.794642377 | 1086.4 | 13.0 | 1100.3 | 11.0 | 1127.8 | 19.8  | 3.7   |
| Spot 26 | 500  | 4006.9   | 1.3  | 19.8 | 1.0 | 0.3 | 1.7 | 0.0 | 1.3 | 0.782119058 | 286.1  | 3.7  | 262.6  | 3.9  | 57.3   | 25.2  | ####  |



|         |      |           |      |      |     |     |     |     |     |             |        |      |        |      |        |       |       |
|---------|------|-----------|------|------|-----|-----|-----|-----|-----|-------------|--------|------|--------|------|--------|-------|-------|
| Spot 27 | 398  | 30670.7   | 1.8  | 17.7 | 1.1 | 0.6 | 1.8 | 0.1 | 1.5 | 0.809411142 | 479.6  | 6.8  | 478.3  | 6.9  | 472.3  | 23.7  | -1.5  |
| Spot 28 | 181  | 1205599.6 | 1.1  | 16.1 | 2.4 | 0.8 | 2.9 | 0.1 | 1.6 | 0.555477633 | 560.6  | 8.6  | 586.2  | 12.8 | 686.7  | 50.9  | 18.4  |
| Spot 29 | 187  | 37174.4   | 3.1  | 13.3 | 1.3 | 1.7 | 1.9 | 0.2 | 1.4 | 0.729784324 | 966.4  | 12.8 | 1001.9 | 12.4 | 1080.5 | 26.7  | 10.6  |
| Spot 31 | 483  | 7591.4    | 2.0  | 15.9 | 1.0 | 0.7 | 2.1 | 0.1 | 1.8 | 0.864397274 | 519.0  | 8.9  | 543.6  | 8.7  | 648.2  | 22.3  | 19.9  |
| Spot 32 | 703  | 78545.5   | 2.2  | 9.4  | 1.1 | 1.4 | 2.9 | 0.1 | 2.6 | 0.918677767 | 575.3  | 14.5 | 879.9  | 16.9 | 1751.3 | 20.8  | 67.2  |
| Spot 33 | 402  | 31547.8   | 1.7  | 20.4 | 1.9 | 0.3 | 3.5 | 0.0 | 3.0 | 0.851112368 | 305.7  | 9.0  | 287.7  | 8.9  | 144.2  | 43.6  | ####  |
| Spot 34 | 256  | 34739.6   | 1.3  | 13.3 | 1.9 | 1.8 | 5.3 | 0.2 | 4.9 | 0.929712677 | 1042.6 | 47.2 | 1051.8 | 34.5 | 1070.9 | 39.0  | 2.6   |
| Spot 35 | 216  | 11968.8   | 1.5  | 12.6 | 1.1 | 2.0 | 3.4 | 0.2 | 3.2 | 0.944300445 | 1096.8 | 32.5 | 1124.6 | 23.2 | 1178.6 | 22.2  | 6.9   |
| Spot 36 | 451  | 5845.0    | 1.4  | 19.3 | 1.2 | 0.3 | 2.4 | 0.0 | 1.7 | 0.676222468 | 255.2  | 4.1  | 248.3  | 5.4  | 183.4  | 42.0  | -39.1 |
| Spot 37 | 1739 | 4688.5    | 0.8  | 19.9 | 1.3 | 0.2 | 1.9 | 0.0 | 1.3 | 0.683940484 | 163.5  | 2.1  | 157.8  | 2.7  | 72.5   | 32.5  | ####  |
| Spot 38 | 652  | 6226.5    | 14.5 | 19.3 | 1.5 | 0.3 | 2.3 | 0.0 | 1.5 | 0.644854669 | 233.1  | 3.4  | 229.0  | 4.7  | 187.5  | 41.1  | -24.3 |
| Spot 39 | 792  | 54221.8   | 2.2  | 16.7 | 1.1 | 0.8 | 2.1 | 0.1 | 1.8 | 0.856279479 | 565.1  | 9.6  | 574.8  | 9.1  | 613.6  | 23.2  | 7.9   |
| Spot 40 | 121  | 17427.6   | 1.8  | 12.3 | 1.3 | 2.1 | 2.7 | 0.2 | 2.3 | 0.877314056 | 1123.6 | 24.0 | 1159.2 | 18.4 | 1226.4 | 25.0  | 8.4   |
| Spot 41 | 904  | 78613.1   | 1.7  | 6.4  | 1.0 | 9.7 | 2.3 | 0.4 | 2.0 | 0.90287016  | 2366.4 | 40.4 | 2402.9 | 20.8 | 2433.9 | 16.5  | 2.8   |
| Spot 42 | 316  | 3143.4    | 0.6  | 19.2 | 3.9 | 0.2 | 4.3 | 0.0 | 1.3 | 0.305940608 | 225.4  | 2.9  | 214.4  | 8.3  | 94.6   | 96.5  | ####  |
| Spot 43 | 1834 | 53994.9   | 3.7  | 12.0 | 0.8 | 2.5 | 1.6 | 0.2 | 1.4 | 0.873558194 | 1287.9 | 16.7 | 1286.3 | 11.9 | 1283.5 | 15.5  | -0.3  |
| Spot 44 | 440  | 14615.6   | 1.3  | 18.9 | 3.0 | 0.3 | 4.3 | 0.0 | 3.1 | 0.716622816 | 287.5  | 8.7  | 289.5  | 10.8 | 305.9  | 68.3  | 6.0   |
| Spot 45 | 359  | 37355.3   | 1.2  | 10.9 | 1.4 | 2.9 | 2.4 | 0.2 | 2.0 | 0.817537076 | 1340.1 | 24.2 | 1394.8 | 18.5 | 1479.5 | 26.7  | 9.4   |
| Spot 46 | 122  | 1599.4    | 1.0  | 17.5 | 4.9 | 0.3 | 5.9 | 0.0 | 2.8 | 0.475990693 | 257.6  | 7.1  | 244.8  | 12.8 | 123.1  | 121.7 | ####  |
| Spot 47 | 632  | 14878.4   | 4.0  | 13.0 | 1.0 | 1.8 | 2.0 | 0.2 | 1.8 | 0.868337781 | 1011.1 | 16.4 | 1047.3 | 13.2 | 1123.8 | 20.0  | 10.0  |
| Spot 48 | 221  | 1923.7    | 1.7  | 18.0 | 3.1 | 0.3 | 3.5 | 0.0 | 1.4 | 0.402891634 | 292.1  | 4.0  | 273.9  | 8.3  | 121.1  | 74.7  | ####  |
| Spot 49 | 1215 | 183086.3  | 2.8  | 17.4 | 1.1 | 0.6 | 1.5 | 0.1 | 1.1 | 0.69596363  | 440.4  | 4.6  | 455.6  | 5.7  | 532.9  | 24.3  | 17.3  |
| Spot 50 | 262  | 13316.8   | 2.0  | 16.9 | 1.6 | 0.7 | 2.3 | 0.1 | 1.6 | 0.695153714 | 553.2  | 8.6  | 554.7  | 10.0 | 560.6  | 36.6  | 1.3   |
| Spot 51 | 491  | 19148.0   | 1.4  | 18.8 | 2.4 | 0.3 | 2.9 | 0.0 | 1.6 | 0.550197513 | 278.1  | 4.3  | 283.7  | 7.1  | 330.5  | 54.6  | 15.9  |
| Spot 52 | 110  | 34710.3   | 2.4  | 14.5 | 1.4 | 1.4 | 2.3 | 0.2 | 1.8 | 0.792260439 | 909.4  | 15.5 | 908.8  | 13.9 | 907.2  | 29.0  | -0.2  |
| Spot 54 | 1047 | 6854.1    | 19.2 | 19.7 | 1.4 | 0.3 | 2.2 | 0.0 | 1.3 | 0.603220273 | 240.8  | 3.1  | 232.8  | 4.5  | 152.8  | 40.3  | -57.5 |
| Spot 55 | 520  | 27489.9   | 3.2  | 17.7 | 1.6 | 0.7 | 2.8 | 0.1 | 2.3 | 0.809718192 | 539.5  | 11.7 | 526.3  | 11.4 | 469.7  | 36.2  | -14.9 |
| Spot 56 | 304  | 6082.5    | 0.8  | 18.2 | 4.2 | 0.2 | 5.7 | 0.0 | 3.7 | 0.649610124 | 183.8  | 6.8  | 194.5  | 10.2 | 325.6  | 99.1  | 43.5  |
| Spot 57 | 1584 | 73559.8   | 7.0  | 14.8 | 0.9 | 0.6 | 1.7 | 0.1 | 1.4 | 0.857048346 | 384.8  | 5.3  | 460.4  | 6.1  | 857.6  | 17.7  | 55.1  |
| Spot 58 | 571  | 34731.3   | 4.3  | 12.6 | 1.0 | 2.1 | 2.1 | 0.2 | 1.9 | 0.874172343 | 1132.4 | 19.3 | 1150.4 | 14.6 | 1184.3 | 20.4  | 4.4   |
| Spot 59 | 850  | 21173.7   | 9.1  | 15.9 | 1.2 | 0.9 | 2.0 | 0.1 | 1.6 | 0.784619391 | 618.2  | 9.4  | 633.1  | 9.5  | 686.7  | 26.8  | 10.0  |
| Spot 60 | 548  | 38065.4   | 0.4  | 19.5 | 2.5 | 0.2 | 3.9 | 0.0 | 3.0 | 0.77401739  | 182.1  | 5.4  | 186.9  | 6.7  | 248.7  | 56.9  | 26.8  |
| Spot 61 | 839  | 17167.9   | 4.4  | 17.7 | 1.4 | 0.6 | 2.1 | 0.1 | 1.5 | 0.721058669 | 451.6  | 6.6  | 451.6  | 7.7  | 451.7  | 32.4  | 0.0   |
| Spot 62 | 564  | 103033.4  | 2.0  | 12.0 | 0.9 | 2.3 | 1.5 | 0.2 | 1.2 | 0.800847853 | 1163.7 | 12.7 | 1203.8 | 10.5 | 1276.4 | 17.3  | 8.8   |
| Spot 63 | 1987 | 37372.4   | 0.9  | 19.4 | 1.9 | 0.3 | 3.0 | 0.0 | 2.4 | 0.784712488 | 269.0  | 6.3  | 268.0  | 7.2  | 259.1  | 43.4  | -3.8  |
| Spot 64 | 1404 | 49867.8   | 3.0  | 12.2 | 0.9 | 2.3 | 1.6 | 0.2 | 1.4 | 0.844867261 | 1190.1 | 15.0 | 1211.2 | 11.5 | 1249.0 | 17.1  | 4.7   |
| Spot 66 | 1331 | 21758.2   | 7.3  | 12.3 | 1.1 | 2.1 | 1.9 | 0.2 | 1.6 | 0.838252665 | 1108.8 | 16.5 | 1144.9 | 13.3 | 1214.1 | 20.8  | 8.7   |
| Spot 67 | 724  | 12425.8   | 1.2  | 17.5 | 3.6 | 0.2 | 3.9 | 0.0 | 1.4 | 0.367727579 | 155.0  | 2.2  | 175.3  | 6.3  | 458.2  | 81.0  | 66.2  |
| Spot 68 | 1954 | 294661.2  | 11.3 | 13.4 | 0.8 | 1.8 | 1.4 | 0.2 | 1.1 | 0.80333932  | 1048.8 | 11.1 | 1055.4 | 9.4  | 1069.1 | 17.0  | 1.9   |
| Spot 69 | 955  | 69531.8   | 23.5 | 19.5 | 1.2 | 0.3 | 1.9 | 0.0 | 1.5 | 0.777539422 | 250.8  | 3.7  | 250.4  | 4.3  | 246.7  | 28.1  | -1.6  |
| Spot 70 | 713  | 28361.7   | 1.8  | 17.3 | 2.0 | 0.4 | 3.1 | 0.0 | 2.3 | 0.757265515 | 292.1  | 6.7  | 317.5  | 8.4  | 509.1  | 44.5  | 42.6  |
| Spot 71 | 308  | 60377.8   | 3.4  | 12.2 | 1.0 | 2.3 | 3.2 | 0.2 | 3.1 | 0.948083636 | 1179.3 | 32.9 | 1204.4 | 22.7 | 1249.9 | 20.0  | 5.7   |
| Spot 72 | 525  | 4770.7    | 1.6  | 20.4 | 3.5 | 0.1 | 4.0 | 0.0 | 1.9 | 0.480911683 | 73.5   | 1.4  | 71.5   | 2.8  | 5.7    | NA    |       |

|          |      |           |      |      |     |     |     |     |     |             |        |      |        |      |        |       |       |
|----------|------|-----------|------|------|-----|-----|-----|-----|-----|-------------|--------|------|--------|------|--------|-------|-------|
| Spot 73  | 1410 | 177851.8  | 1.4  | 19.0 | 1.1 | 0.3 | 1.8 | 0.0 | 1.5 | 0.793049847 | 276.6  | 3.9  | 281.7  | 4.5  | 323.9  | 25.4  | 14.6  |
| Spot 74  | 212  | 13662.5   | 1.9  | 9.3  | 1.0 | 4.3 | 2.6 | 0.3 | 2.4 | 0.924125901 | 1642.5 | 35.3 | 1688.8 | 21.7 | 1746.9 | 18.5  | 6.0   |
| Spot 76  | 1475 | 2490.2    | 79.8 | 13.9 | 5.8 | 0.2 | 6.2 | 0.0 | 1.1 | 0.177132538 | 113.1  | 1.2  | 152.7  | 8.8  | 822.8  | 128.0 | 86.3  |
| Spot 77  | 632  | 6796.0    | 4.0  | 17.8 | 2.4 | 0.4 | 3.2 | 0.0 | 1.9 | 0.592043175 | 308.7  | 5.6  | 316.2  | 8.6  | 371.6  | 57.2  | 16.9  |
| Spot 78  | 1486 | 25876.8   | 1.1  | 19.2 | 1.2 | 0.3 | 1.8 | 0.0 | 1.3 | 0.727733956 | 275.7  | 3.6  | 274.9  | 4.4  | 268.5  | 29.0  | -2.7  |
| Spot 79  | 925  | 29564.8   | 1.1  | 19.9 | 1.2 | 0.2 | 1.9 | 0.0 | 1.4 | 0.763717397 | 183.9  | 2.6  | 184.4  | 3.2  | 191.7  | 28.3  | 4.1   |
| Spot 80  | 385  | 5292.0    | 0.9  | 13.5 | 4.1 | 0.8 | 5.1 | 0.1 | 2.4 | 0.46098127  | 490.9  | 11.2 | 587.2  | 22.9 | 979.8  | 92.8  | 49.9  |
| Spot 81  | 1578 | 116209.7  | 1.1  | 17.6 | 1.0 | 0.6 | 1.6 | 0.1 | 1.2 | 0.763465759 | 451.3  | 5.3  | 459.0  | 5.9  | 497.2  | 22.6  | 9.2   |
| Spot 82  | 305  | 10425.6   | 1.1  | 13.4 | 0.8 | 1.8 | 1.8 | 0.2 | 1.5 | 0.81399235  | 1045.3 | 14.5 | 1040.6 | 12.0 | 1030.7 | 21.7  | -1.4  |
| Spot 84  | 368  | 262997.1  | 3.8  | 11.6 | 0.9 | 2.8 | 1.5 | 0.2 | 1.3 | 0.815508123 | 1343.6 | 15.2 | 1345.0 | 11.4 | 1347.1 | 17.1  | 0.3   |
| Spot 85  | 821  | 40794.7   | 2.4  | 12.6 | 0.7 | 2.1 | 1.5 | 0.2 | 1.3 | 0.882760803 | 1118.6 | 13.3 | 1139.2 | 10.1 | 1178.6 | 13.7  | 5.1   |
| Spot 86  | 380  | 29878.9   | 3.7  | 12.6 | 1.0 | 2.2 | 2.6 | 0.2 | 2.4 | 0.928698493 | 1157.7 | 25.3 | 1167.8 | 17.8 | 1186.5 | 18.8  | 2.4   |
| Spot 87  | 978  | 2414920.3 | 5.6  | 13.7 | 1.2 | 1.5 | 2.1 | 0.1 | 1.7 | 0.81967382  | 870.2  | 14.0 | 915.9  | 12.6 | 1027.8 | 24.3  | 15.3  |
| Spot 88  | 1584 | 180477.2  | 6.3  | 17.6 | 1.2 | 0.6 | 1.9 | 0.1 | 1.5 | 0.770748712 | 464.9  | 6.5  | 469.4  | 7.1  | 491.7  | 26.6  | 5.5   |
| Spot 89  | 396  | 27355.0   | 5.7  | 12.7 | 1.1 | 2.1 | 2.5 | 0.2 | 2.3 | 0.902853293 | 1120.4 | 23.2 | 1135.9 | 17.1 | 1165.4 | 21.3  | 3.9   |
| Spot 90  | 283  | 72829.2   | 3.1  | 15.9 | 2.5 | 1.0 | 3.2 | 0.1 | 2.0 | 0.628670262 | 707.1  | 13.4 | 706.3  | 16.2 | 703.9  | 52.5  | -0.4  |
| Spot 92  | 779  | 11913.4   | 0.7  | 14.5 | 2.4 | 0.9 | 3.4 | 0.1 | 2.2 | 0.663065317 | 612.8  | 13.1 | 670.0  | 16.6 | 867.4  | 52.4  | 29.4  |
| Spot 93  | 352  | 41318.4   | 1.6  | 13.2 | 1.7 | 1.8 | 2.7 | 0.2 | 2.1 | 0.780613184 | 1010.9 | 19.7 | 1035.1 | 17.5 | 1086.6 | 33.8  | 7.0   |
| Spot 94  | 2358 | 138642.2  | 4.5  | 12.4 | 0.9 | 2.4 | 1.5 | 0.2 | 1.2 | 0.799910427 | 1238.9 | 13.8 | 1231.1 | 10.9 | 1217.4 | 18.0  | -1.8  |
| Spot 95  | 1272 | 7975.7    | 14.2 | 18.1 | 1.6 | 0.3 | 2.3 | 0.0 | 1.4 | 0.594456354 | 234.6  | 3.1  | 245.6  | 5.0  | 351.7  | 41.6  | 33.3  |
| Spot 97  | 100  | 4179.9    | 2.0  | 12.3 | 1.4 | 1.9 | 2.6 | 0.2 | 1.9 | 0.712752758 | 1057.2 | 18.1 | 1088.0 | 17.4 | 1150.0 | 36.3  | 8.1   |
| Spot 98  | 545  | 11919.6   | 4.1  | 19.8 | 1.5 | 0.3 | 2.4 | 0.0 | 1.7 | 0.712526723 | 259.6  | 4.4  | 250.1  | 5.4  | 162.7  | 40.2  | -59.5 |
| Spot 99  | 671  | 45899.1   | 4.0  | 10.6 | 1.0 | 3.4 | 1.8 | 0.3 | 1.5 | 0.833564031 | 1500.6 | 20.5 | 1505.3 | 14.4 | 1511.8 | 19.1  | 0.7   |
| Spot 100 | 1324 | 21614.8   | 2.3  | 19.5 | 1.8 | 0.3 | 2.8 | 0.0 | 2.1 | 0.759115864 | 296.1  | 6.1  | 289.2  | 7.0  | 233.9  | 41.8  | -26.6 |
| Spot 101 | 955  | 24986.4   | 0.8  | 18.2 | 1.8 | 0.3 | 2.5 | 0.0 | 1.7 | 0.681865088 | 261.9  | 4.4  | 276.1  | 6.1  | 398.3  | 41.3  | 34.2  |
| Spot 102 | 366  | 59954.2   | 3.7  | 11.6 | 0.9 | 2.8 | 1.6 | 0.2 | 1.3 | 0.803223506 | 1359.5 | 15.4 | 1355.4 | 11.7 | 1349.1 | 18.0  | -0.8  |
| Spot 104 | 333  | 74947.8   | 3.2  | 10.4 | 0.9 | 3.5 | 1.7 | 0.3 | 1.4 | 0.827778211 | 1518.6 | 18.8 | 1534.1 | 13.3 | 1555.4 | 17.7  | 2.4   |
| Spot 105 | 398  | 19388.7   | 2.5  | 9.7  | 1.0 | 4.1 | 1.9 | 0.3 | 1.6 | 0.84291796  | 1653.3 | 22.8 | 1659.7 | 15.1 | 1667.8 | 18.4  | 0.9   |
| Spot 107 | 665  | 34233.5   | 4.5  | 12.8 | 1.0 | 2.1 | 2.0 | 0.2 | 1.7 | 0.865313945 | 1141.7 | 17.8 | 1145.0 | 13.5 | 1151.3 | 19.6  | 0.8   |
| Spot 108 | 614  | 6134.8    | 1.5  | 18.8 | 1.3 | 0.3 | 2.1 | 0.0 | 1.7 | 0.770392935 | 273.1  | 4.4  | 270.0  | 5.1  | 243.6  | 31.5  | -12.1 |
| Spot 109 | 277  | 4619.7    | 1.8  | 19.2 | 2.4 | 0.3 | 2.7 | 0.0 | 1.1 | 0.415227206 | 240.3  | 2.6  | 231.7  | 5.6  | 144.8  | 57.6  | -66.0 |
| Spot 110 | 218  | 5995.0    | 2.1  | 12.6 | 1.4 | 2.0 | 2.4 | 0.2 | 1.9 | 0.794231461 | 1123.3 | 19.3 | 1126.1 | 16.0 | 1131.5 | 28.4  | 0.7   |
| Spot 111 | 464  | 107018.9  | 2.4  | 13.3 | 1.1 | 1.8 | 1.8 | 0.2 | 1.5 | 0.797908503 | 1020.2 | 13.7 | 1041.5 | 11.9 | 1086.3 | 22.0  | 6.1   |
| Spot 112 | 3347 | 17311.4   | 6.0  | 13.1 | 1.5 | 1.7 | 2.7 | 0.2 | 2.2 | 0.80664046  | 978.4  | 19.6 | 1014.9 | 17.2 | 1094.6 | 31.6  | 10.6  |
| Spot 113 | 542  | 58308.8   | 0.7  | 17.5 | 1.2 | 0.7 | 1.9 | 0.1 | 1.5 | 0.786378798 | 519.2  | 7.4  | 517.8  | 7.7  | 511.7  | 25.8  | -1.5  |
| Spot 114 | 330  | 15465.5   | 0.9  | 17.7 | 3.2 | 0.3 | 3.8 | 0.0 | 2.1 | 0.542184806 | 274.6  | 5.6  | 294.1  | 9.8  | 452.4  | 71.4  | 39.3  |
| Spot 115 | 129  | 7019.2    | 2.0  | 13.5 | 1.2 | 1.5 | 2.5 | 0.2 | 1.7 | 0.68568871  | 927.2  | 15.0 | 948.6  | 15.6 | 998.5  | 37.5  | 7.1   |
| Spot 116 | 532  | 28210.7   | 2.2  | 17.9 | 2.7 | 0.5 | 4.1 | 0.1 | 3.0 | 0.738218491 | 390.9  | 11.4 | 399.8  | 13.4 | 451.6  | 60.8  | 13.4  |
| Spot 117 | 326  | 7720.1    | 1.5  | 19.2 | 1.9 | 0.3 | 2.5 | 0.0 | 1.6 | 0.634899552 | 276.5  | 4.3  | 271.5  | 5.9  | 228.7  | 44.5  | -20.9 |
| Spot 118 | 501  | 18811.0   | 6.3  | 18.2 | 2.8 | 0.3 | 3.5 | 0.0 | 2.1 | 0.612976041 | 242.5  | 5.1  | 257.3  | 7.9  | 394.7  | 61.9  | 38.6  |
| Spot 119 | 375  | 330852.4  | 1.5  | 12.9 | 0.8 | 2.2 | 1.3 | 0.2 | 1.0 | 0.778382078 | 1202.2 | 10.9 | 1182.1 | 8.9  | 1145.5 | 16.0  | -4.9  |
| Spot 120 | 384  | 41455.0   | 1.0  | 11.4 | 0.8 | 2.9 | 1.4 | 0.2 | 1.1 | 0.800464975 | 1368.6 | 13.6 | 1375.7 | 10.3 | 1386.8 | 15.8  | 1.3   |
| Spot 122 | 159  | 973.5     | 1.6  | 18.1 | 4.8 | 0.2 | 6.1 | 0.0 | 3.6 | 0.592879258 | 281.2  | 9.9  | 225.0  | 12.2 | NA     | NA    |       |

|          |      |          |      |      |     |     |     |     |     |             |        |      |        |      |        |      |       |
|----------|------|----------|------|------|-----|-----|-----|-----|-----|-------------|--------|------|--------|------|--------|------|-------|
| Spot 124 | 595  | 24880.4  | 6.6  | 14.8 | 1.7 | 0.5 | 3.1 | 0.1 | 2.5 | 0.832232308 | 369.6  | 9.1  | 444.6  | 11.0 | 854.3  | 35.2 | 56.7  |
| Spot 125 | 742  | 7932.4   | 4.3  | 17.5 | 2.0 | 0.4 | 2.6 | 0.1 | 1.7 | 0.637251557 | 329.7  | 5.4  | 343.6  | 7.7  | 438.8  | 45.1 | 24.9  |
| Spot 126 | 401  | 5130.2   | 0.9  | 17.7 | 2.6 | 0.3 | 3.3 | 0.0 | 1.8 | 0.560101346 | 263.9  | 4.7  | 275.4  | 7.8  | 374.2  | 60.6 | 29.5  |
| Spot 127 | 242  | 1323.6   | 2.1  | 16.2 | 2.8 | 0.2 | 3.3 | 0.0 | 1.7 | 0.501062891 | 166.8  | 2.8  | 172.2  | 5.3  | 246.0  | 66.8 | 32.2  |
| Spot 128 | 384  | 8437.1   | 4.9  | 14.1 | 1.4 | 1.5 | 2.1 | 0.2 | 1.5 | 0.699398894 | 915.7  | 12.6 | 918.4  | 12.8 | 925.2  | 31.0 | 1.0   |
| Spot 129 | 1846 | 22132.7  | 1.7  | 13.0 | 0.8 | 2.0 | 1.6 | 0.2 | 1.4 | 0.840202072 | 1104.3 | 13.9 | 1111.3 | 11.0 | 1125.0 | 17.6 | 1.8   |
| Spot 130 | 615  | 1109.7   | 1.5  | 19.3 | 3.6 | 0.1 | 4.2 | 0.0 | 1.9 | 0.444793003 | 82.4   | 1.5  | 67.4   | 2.7  | NA     | NA   |       |
| Spot 131 | 1221 | 4069.0   | 6.2  | 15.5 | 1.5 | 0.3 | 1.9 | 0.0 | 1.2 | 0.627605884 | 215.2  | 2.6  | 257.5  | 4.4  | 662.2  | 32.2 | 67.5  |
| Spot 132 | 444  | 14523.9  | 1.3  | 19.2 | 1.8 | 0.3 | 2.4 | 0.0 | 1.5 | 0.639642084 | 278.4  | 4.2  | 277.8  | 5.9  | 272.5  | 42.6 | -2.1  |
| Spot 133 | 384  | 10452.8  | 3.0  | 12.2 | 1.5 | 2.0 | 2.0 | 0.2 | 1.3 | 0.623870841 | 1064.6 | 12.4 | 1120.4 | 13.7 | 1230.2 | 31.0 | 13.5  |
| Spot 134 | 641  | 7472.4   | 2.2  | 26.8 | 2.8 | 0.1 | 3.6 | 0.0 | 2.4 | 0.651889522 | 93.5   | 2.2  | 70.7   | 2.5  | NA     | NA   |       |
| Spot 135 | 155  | 22688.8  | 1.8  | 17.9 | 2.7 | 0.7 | 3.8 | 0.1 | 2.7 | 0.716603831 | 564.7  | 14.9 | 541.0  | 16.1 | 442.4  | 59.5 | -27.6 |
| Spot 136 | 465  | 175197.7 | 1.6  | 18.2 | 2.1 | 0.3 | 3.2 | 0.0 | 2.3 | 0.736509924 | 268.0  | 6.1  | 285.4  | 7.9  | 431.0  | 47.6 | 37.8  |
| Spot 137 | 497  | 83212.1  | 3.1  | 14.1 | 1.1 | 1.5 | 1.8 | 0.2 | 1.4 | 0.791327551 | 903.3  | 12.0 | 923.8  | 10.9 | 973.1  | 22.4 | 7.2   |
| Spot 139 | 535  | 6498.7   | 1.2  | 12.2 | 4.4 | 0.5 | 4.7 | 0.0 | 1.2 | 0.260338333 | 268.2  | 3.2  | 393.3  | 15.3 | 1216.0 | 88.9 | 77.9  |
| Spot 140 | 1614 | 585057.1 | 4.3  | 12.6 | 0.9 | 2.2 | 1.4 | 0.2 | 1.0 | 0.766888279 | 1184.3 | 11.2 | 1188.0 | 9.5  | 1194.7 | 17.1 | 0.9   |
| Spot 141 | 208  | 28618.5  | 3.1  | 14.5 | 1.2 | 1.3 | 1.7 | 0.1 | 1.2 | 0.694658529 | 801.5  | 8.9  | 828.1  | 9.7  | 900.2  | 25.3 | 11.0  |
| Spot 142 | 410  | 135790.1 | 3.2  | 12.3 | 0.7 | 2.4 | 1.4 | 0.2 | 1.2 | 0.843815112 | 1220.4 | 12.8 | 1231.4 | 9.7  | 1250.7 | 14.3 | 2.4   |
| Spot 143 | 91   | 885.0    | 3.3  | 16.4 | 4.4 | 0.2 | 6.6 | 0.0 | 1.6 | 0.236515259 | 215.8  | 3.3  | 193.6  | 11.7 | NA     | NA   |       |
| Spot 144 | 193  | 4243.2   | 0.9  | 19.0 | 3.0 | 0.3 | 4.8 | 0.0 | 3.4 | 0.707665938 | 276.3  | 9.1  | 266.6  | 11.2 | 182.3  | 78.7 | -51.5 |
| Spot 146 | 83   | 466868.7 | 2.5  | 13.2 | 2.0 | 1.9 | 3.5 | 0.2 | 2.9 | 0.819041945 | 1092.8 | 29.2 | 1094.8 | 23.8 | 1098.7 | 40.7 | 0.5   |
| Spot 147 | 438  | 5905.3   | 0.7  | 20.0 | 1.9 | 0.3 | 5.5 | 0.0 | 5.1 | 0.933857331 | 302.4  | 15.0 | 280.0  | 13.3 | 96.2   | 46.2 | ####  |
| Spot 148 | 602  | 12537.3  | 1.2  | 18.5 | 2.2 | 0.3 | 2.8 | 0.0 | 1.7 | 0.6030528   | 260.4  | 4.3  | 268.6  | 6.5  | 341.1  | 49.9 | 23.6  |
| Spot 149 | 288  | 20094.1  | 1.8  | 18.3 | 2.9 | 0.3 | 3.5 | 0.0 | 1.9 | 0.542155654 | 279.7  | 5.2  | 291.0  | 8.8  | 382.8  | 66.0 | 26.9  |
| Spot 150 | 2076 | 21995.0  | 1.8  | 18.8 | 0.9 | 0.4 | 1.6 | 0.1 | 1.3 | 0.823429877 | 338.4  | 4.3  | 336.2  | 4.5  | 321.3  | 20.3 | -5.3  |
| Spot 151 | 355  | 1585.4   | 0.8  | 19.2 | 1.4 | 0.3 | 2.2 | 0.0 | 1.6 | 0.726222233 | 279.3  | 4.4  | 236.3  | 4.7  | NA     | NA   |       |
| Spot 152 | 260  | 2785.5   | 1.0  | 18.3 | 2.6 | 0.3 | 4.3 | 0.0 | 2.6 | 0.622784531 | 249.4  | 6.5  | 243.3  | 9.2  | 184.9  | 77.5 | -34.9 |
| Spot 153 | 837  | 40604.6  | 0.8  | 12.8 | 0.8 | 2.0 | 1.6 | 0.2 | 1.4 | 0.867641975 | 1103.8 | 14.3 | 1122.6 | 11.0 | 1159.1 | 16.0 | 4.8   |
| Spot 155 | 869  | 21159.4  | 1.8  | 17.3 | 0.7 | 0.6 | 1.3 | 0.1 | 1.0 | 0.808178954 | 444.7  | 4.5  | 455.3  | 4.8  | 509.1  | 16.8 | 12.6  |
| Spot 158 | 793  | 10218.7  | 13.3 | 19.5 | 1.3 | 0.3 | 1.9 | 0.0 | 1.4 | 0.733913276 | 242.1  | 3.3  | 238.0  | 4.0  | 198.2  | 29.7 | -22.2 |
| Spot 159 | 974  | 137914.1 | 9.2  | 7.2  | 1.3 | 1.9 | 6.0 | 0.1 | 5.9 | 0.975762616 | 623.4  | 34.9 | 1096.3 | 40.4 | 2212.8 | 22.8 | 71.8  |
| Spot 160 | 151  | 7967.1   | 3.3  | 14.1 | 1.6 | 1.4 | 2.6 | 0.1 | 2.0 | 0.774845219 | 870.0  | 16.1 | 883.8  | 15.1 | 918.4  | 33.2 | 5.3   |
| Spot 162 | 1052 | 32479.7  | 2.6  | 11.4 | 0.8 | 2.8 | 1.4 | 0.2 | 1.1 | 0.809732093 | 1346.6 | 13.4 | 1359.0 | 10.2 | 1378.6 | 15.3 | 2.3   |
| Spot 163 | 241  | 2103.4   | 1.3  | 19.7 | 4.0 | 0.2 | 6.3 | 0.0 | 3.0 | 0.475404056 | 206.6  | 6.1  | 184.0  | 10.6 | NA     | NA   |       |
| Spot 164 | 150  | 4429.7   | 3.4  | 13.8 | 1.2 | 1.5 | 3.0 | 0.2 | 1.5 | 0.508438771 | 921.9  | 13.0 | 925.3  | 18.0 | 933.3  | 52.5 | 1.2   |
| Spot 165 | 329  | 15943.4  | 1.1  | 11.6 | 0.8 | 2.7 | 1.5 | 0.2 | 1.3 | 0.844205729 | 1298.6 | 15.2 | 1317.6 | 11.3 | 1348.5 | 15.9 | 3.7   |
| Spot 166 | 327  | 10589.9  | 2.2  | 19.1 | 1.6 | 0.3 | 2.3 | 0.0 | 1.6 | 0.700283946 | 284.0  | 4.5  | 281.8  | 5.6  | 263.8  | 37.6 | -7.7  |
| Spot 167 | 794  | 403580.2 | 3.6  | 13.6 | 1.1 | 1.6 | 1.9 | 0.2 | 1.5 | 0.797377418 | 946.3  | 13.1 | 977.6  | 11.7 | 1048.8 | 22.7 | 9.8   |
| Spot 168 | 853  | 238224.2 | 8.6  | 18.3 | 1.7 | 0.3 | 2.2 | 0.0 | 1.4 | 0.623610415 | 275.9  | 3.8  | 291.3  | 5.7  | 416.7  | 39.1 | 33.8  |
| Spot 169 | 109  | 10461.8  | 2.3  | 13.7 | 2.3 | 1.4 | 3.5 | 0.1 | 2.6 | 0.754640006 | 834.9  | 20.5 | 879.8  | 20.4 | 994.5  | 46.3 | 16.1  |
| Spot 171 | 206  | 8515.5   | 1.0  | 16.8 | 1.7 | 0.6 | 2.7 | 0.1 | 2.1 | 0.777072547 | 444.2  | 9.2  | 460.9  | 10.2 | 545.1  | 37.7 | 18.5  |
| Spot 172 | 860  | 35724.1  | 2.7  | 11.4 | 0.7 | 2.4 | 1.6 | 0.2 | 1.5 | 0.899009888 | 1155.7 | 15.4 | 1236.4 | 11.6 | 1379.9 | 13.7 | 16.2  |
| Spot 173 | 261  | 14908.0  | 2.7  | 12.3 | 1.0 | 2.3 | 1.8 | 0.2 | 1.4 | 0.802719644 | 1216.1 | 15.8 | 1219.8 | 12.6 | 1226.2 | 20.8 | 0.8   |

|          |      |          |      |      |     |     |      |     |     |             |        |      |        |      |        |       |       |
|----------|------|----------|------|------|-----|-----|------|-----|-----|-------------|--------|------|--------|------|--------|-------|-------|
| Spot 174 | 315  | 39599.3  | 1.4  | 13.5 | 2.2 | 1.8 | 3.5  | 0.2 | 2.7 | 0.784115883 | 1071.0 | 27.0 | 1061.8 | 23.0 | 1042.9 | 43.7  | -2.7  |
| Spot 176 | 326  | 17861.0  | 1.5  | 18.4 | 1.3 | 0.4 | 2.4  | 0.1 | 2.0 | 0.832194637 | 337.9  | 6.6  | 341.7  | 6.9  | 367.4  | 29.9  | 8.0   |
| Spot 177 | 1020 | 30436.1  | 2.4  | 13.5 | 0.9 | 1.8 | 1.9  | 0.2 | 1.7 | 0.870086012 | 1024.7 | 15.8 | 1029.9 | 12.4 | 1041.0 | 19.1  | 1.6   |
| Spot 178 | 1243 | 36419.5  | 2.4  | 13.9 | 2.0 | 0.5 | 2.7  | 0.1 | 1.8 | 0.676432845 | 323.6  | 5.8  | 418.6  | 9.3  | 982.4  | 40.8  | 67.1  |
| Spot 179 | 674  | 39351.6  | 2.1  | 13.0 | 0.8 | 1.9 | 1.8  | 0.2 | 1.6 | 0.892290812 | 1050.6 | 15.8 | 1076.4 | 12.1 | 1129.1 | 16.4  | 7.0   |
| Spot 181 | 362  | 3979.8   | 1.4  | 17.8 | 1.3 | 0.5 | 2.3  | 0.1 | 1.8 | 0.777882479 | 464.2  | 8.0  | 441.5  | 8.3  | 324.7  | 32.9  | -43.0 |
| Spot 182 | 402  | 463138.5 | 4.6  | 14.0 | 1.2 | 1.5 | 2.3  | 0.2 | 1.9 | 0.837453752 | 915.6  | 16.2 | 934.7  | 13.8 | 980.0  | 25.2  | 6.6   |
| Spot 183 | 553  | 35002.9  | 1.5  | 11.9 | 1.0 | 2.5 | 1.9  | 0.2 | 1.7 | 0.856449703 | 1261.4 | 19.1 | 1278.0 | 14.1 | 1305.9 | 19.5  | 3.4   |
| Spot 184 | 207  | 72459.2  | 3.2  | 11.2 | 1.5 | 2.6 | 2.0  | 0.2 | 1.3 | 0.651133168 | 1244.8 | 14.6 | 1308.2 | 14.6 | 1413.9 | 28.8  | 12.0  |
| Spot 186 | 1977 | 35329.8  | 26.0 | 13.7 | 1.5 | 1.1 | 2.1  | 0.1 | 1.4 | 0.682278824 | 679.4  | 9.1  | 762.3  | 11.1 | 1013.7 | 30.8  | 33.0  |
| Spot 187 | 588  | 11446.4  | 3.3  | 14.7 | 1.5 | 0.9 | 3.0  | 0.1 | 2.5 | 0.830739516 | 573.7  | 13.7 | 633.0  | 14.2 | 851.1  | 34.8  | 32.6  |
| Spot 188 | 174  | 1691.9   | 1.2  | 29.1 | 2.1 | 0.2 | 11.8 | 0.1 | 2.0 | 0.167911383 | 409.9  | 7.8  | 211.7  | 22.5 | NA     | NA    |       |
| Spot 189 | 213  | 17449.9  | 2.2  | 11.5 | 1.0 | 2.5 | 2.8  | 0.2 | 2.6 | 0.926562949 | 1235.2 | 29.0 | 1277.4 | 20.2 | 1349.0 | 20.2  | 8.4   |
| Spot 190 | 424  | 5086.2   | 1.2  | 18.5 | 2.4 | 0.3 | 3.5  | 0.0 | 2.4 | 0.673261947 | 299.4  | 6.9  | 294.4  | 9.0  | 255.6  | 59.7  | -17.1 |
| Spot 191 | 1114 | 8338.5   | 2.3  | 19.0 | 0.9 | 0.4 | 1.4  | 0.1 | 1.2 | 0.803578186 | 398.4  | 4.5  | 376.8  | 4.5  | 246.3  | 19.8  | -61.8 |
| Spot 193 | 2011 | 169908.0 | 3.3  | 12.8 | 1.1 | 2.1 | 2.6  | 0.2 | 2.4 | 0.914724844 | 1126.1 | 24.7 | 1138.1 | 17.9 | 1160.9 | 21.0  | 3.0   |
| Spot 194 | 183  | 155404.6 | 2.7  | 13.9 | 2.2 | 1.5 | 3.3  | 0.1 | 2.5 | 0.756856681 | 900.8  | 21.0 | 927.7  | 20.1 | 992.1  | 43.9  | 9.2   |
| Spot 195 | 592  | 7976.2   | 1.1  | 19.8 | 1.5 | 0.3 | 2.5  | 0.0 | 1.6 | 0.632576215 | 281.4  | 4.4  | 267.1  | 6.0  | 143.0  | 46.3  | -96.9 |
| Spot 196 | 920  | 3508.9   | 1.4  | 19.2 | 1.6 | 0.3 | 2.8  | 0.0 | 1.6 | 0.558024844 | 248.5  | 3.8  | 235.0  | 5.8  | 102.6  | 54.7  | ####  |
| Spot 197 | 897  | 9681.8   | 1.1  | 19.2 | 1.1 | 0.3 | 1.9  | 0.0 | 1.5 | 0.773502767 | 271.2  | 4.0  | 267.5  | 4.6  | 235.1  | 28.5  | -15.3 |
| Spot 198 | 775  | 37594.8  | 5.3  | 11.9 | 0.6 | 2.6 | 1.3  | 0.2 | 1.2 | 0.909149819 | 1311.1 | 14.5 | 1303.3 | 9.9  | 1290.4 | 10.9  | -1.6  |
| Spot 199 | 400  | 46845.4  | 3.2  | 7.2  | 0.9 | 7.4 | 1.5  | 0.4 | 1.2 | 0.812208549 | 2114.1 | 22.5 | 2163.7 | 13.7 | 2211.0 | 15.5  | 4.4   |
| Spot 200 | 1503 | 20998.4  | 3.3  | 11.6 | 0.7 | 2.2 | 1.8  | 0.2 | 1.6 | 0.9129273   | 1081.4 | 16.1 | 1168.1 | 12.3 | 1332.6 | 14.0  | 18.8  |
| Spot 201 | 2095 | 121685.5 | 8.0  | 14.4 | 0.8 | 1.4 | 1.7  | 0.1 | 1.5 | 0.875539514 | 864.9  | 12.2 | 882.9  | 10.1 | 928.2  | 17.1  | 6.8   |
| Spot 202 | 1159 | 33463.7  | 6.9  | 14.1 | 1.0 | 1.5 | 1.5  | 0.2 | 1.1 | 0.746565997 | 936.4  | 9.9  | 941.4  | 9.3  | 953.2  | 20.6  | 1.8   |
| Spot 203 | 2376 | 7952.5   | 29.1 | 13.7 | 0.8 | 1.4 | 1.6  | 0.1 | 0.8 | 0.50278154  | 854.4  | 6.6  | 889.8  | 9.8  | 978.8  | 29.0  | 12.7  |
| Spot 204 | 999  | 11713.0  | 1.3  | 19.0 | 1.6 | 0.3 | 2.0  | 0.0 | 1.3 | 0.627068004 | 275.9  | 3.4  | 275.6  | 4.9  | 273.3  | 36.3  | -0.9  |
| Spot 205 | 464  | 21677.0  | 1.5  | 17.8 | 2.7 | 0.3 | 3.1  | 0.0 | 1.6 | 0.509443591 | 270.0  | 4.2  | 289.7  | 7.8  | 452.1  | 59.0  | 40.3  |
| Spot 206 | 341  | 31187.1  | 3.1  | 13.1 | 1.1 | 1.9 | 1.8  | 0.2 | 1.5 | 0.809187709 | 1041.2 | 14.3 | 1064.5 | 12.1 | 1112.3 | 21.5  | 6.4   |
| Spot 207 | 143  | 30995.5  | 2.7  | 12.1 | 1.3 | 2.2 | 2.3  | 0.2 | 1.8 | 0.813613377 | 1127.0 | 19.0 | 1177.5 | 15.8 | 1271.5 | 25.6  | 11.4  |
| Spot 208 | 628  | 17186.7  | 1.3  | 18.7 | 1.8 | 0.3 | 2.5  | 0.0 | 1.7 | 0.677032213 | 269.5  | 4.4  | 276.8  | 6.0  | 339.5  | 41.0  | 20.6  |
| Spot 209 | 390  | 318288.4 | 2.9  | 9.3  | 1.4 | 4.3 | 2.1  | 0.3 | 1.6 | 0.752818564 | 1614.1 | 22.3 | 1688.2 | 17.1 | 1781.4 | 24.9  | 9.4   |
| Spot 210 | 989  | 115382.2 | 8.1  | 12.8 | 1.0 | 2.0 | 1.7  | 0.2 | 1.5 | 0.836737779 | 1075.5 | 14.4 | 1105.0 | 11.7 | 1163.6 | 18.9  | 7.6   |
| Spot 211 | 474  | 14093.4  | 2.0  | 12.7 | 1.1 | 2.1 | 1.6  | 0.2 | 1.2 | 0.740102772 | 1123.3 | 12.5 | 1135.2 | 11.2 | 1158.0 | 21.8  | 3.0   |
| Spot 212 | 299  | 14326.6  | 2.7  | 12.4 | 1.4 | 2.0 | 2.2  | 0.2 | 1.8 | 0.782952172 | 1087.0 | 17.6 | 1128.3 | 15.3 | 1208.5 | 27.5  | 10.1  |
| Spot 214 | 711  | 37267.2  | 2.5  | 13.5 | 0.9 | 1.7 | 2.0  | 0.2 | 1.8 | 0.893963184 | 1000.2 | 16.3 | 1017.3 | 12.6 | 1054.2 | 17.7  | 5.1   |
| Spot 215 | 505  | 11533.6  | 1.0  | 16.6 | 2.2 | 0.6 | 2.6  | 0.1 | 1.2 | 0.474353061 | 467.9  | 5.5  | 490.1  | 10.0 | 595.5  | 49.0  | 21.4  |
| Spot 216 | 706  | 30184.8  | 4.1  | 18.1 | 4.8 | 0.1 | 5.7  | 0.0 | 2.9 | 0.514741485 | 72.1   | 2.1  | 83.5   | 4.5  | 422.3  | 108.3 | 82.9  |
| Spot 217 | 753  | 23764.1  | 1.1  | 10.1 | 0.9 | 3.5 | 2.1  | 0.3 | 1.8 | 0.89062725  | 1479.7 | 24.4 | 1533.8 | 16.4 | 1609.1 | 17.6  | 8.0   |
| Spot 218 | 279  | 14052.7  | 1.1  | 13.6 | 1.6 | 1.7 | 2.0  | 0.2 | 1.3 | 0.649085493 | 977.5  | 12.1 | 991.8  | 13.0 | 1023.6 | 31.6  | 4.5   |
| Spot 220 | 740  | 27525.9  | 3.7  | 12.6 | 0.6 | 2.1 | 1.3  | 0.2 | 1.2 | 0.872996093 | 1107.2 | 11.8 | 1133.9 | 9.1  | 1185.4 | 12.8  | 6.6   |
| Spot 221 | 349  | 2974.1   | 2.1  | 17.9 | 3.2 | 0.3 | 4.5  | 0.0 | 3.0 | 0.671863286 | 276.4  | 8.2  | 275.4  | 10.8 | 266.7  | 76.2  | -3.6  |
| Spot 222 | 785  | 213190.7 | 7.7  | 12.5 | 1.0 | 2.1 | 1.5  | 0.2 | 1.1 | 0.731546158 | 1098.4 | 10.9 | 1137.5 | 10.1 | 1212.8 | 19.7  | 9.4   |

|          |      |          |      |      |     |     |     |     |     |             |        |      |        |      |        |       |       |
|----------|------|----------|------|------|-----|-----|-----|-----|-----|-------------|--------|------|--------|------|--------|-------|-------|
| Spot 223 | 1476 | 181607.0 | 1.6  | 13.9 | 1.3 | 1.0 | 2.2 | 0.1 | 1.8 | 0.816631919 | 596.2  | 10.3 | 689.9  | 11.0 | 1008.6 | 25.8  | 40.9  |
| Spot 224 | 618  | 11117.5  | 8.3  | 10.7 | 1.2 | 2.8 | 2.0 | 0.2 | 1.6 | 0.784726014 | 1276.0 | 18.1 | 1355.9 | 14.9 | 1484.1 | 23.4  | 14.0  |
| Spot 225 | 364  | 15671.4  | 3.2  | 13.6 | 0.9 | 1.7 | 1.6 | 0.2 | 1.3 | 0.821585832 | 1002.6 | 12.0 | 1006.7 | 10.1 | 1015.6 | 18.2  | 1.3   |
| Spot 226 | 336  | 18209.3  | 1.5  | 17.3 | 3.8 | 0.4 | 4.4 | 0.0 | 2.2 | 0.510241707 | 278.3  | 6.1  | 305.2  | 11.6 | 516.4  | 83.2  | 46.1  |
| Spot 227 | 665  | 16493.2  | 15.7 | 19.6 | 1.7 | 0.3 | 2.3 | 0.0 | 1.4 | 0.638381411 | 246.1  | 3.5  | 243.6  | 4.9  | 219.5  | 40.4  | -12.2 |
| Spot 228 | 245  | 11301.2  | 2.7  | 10.3 | 1.3 | 3.3 | 2.3 | 0.2 | 1.9 | 0.832946565 | 1425.5 | 24.5 | 1481.3 | 17.9 | 1562.2 | 23.9  | 8.7   |
| Spot 229 | 254  | 26975.4  | 0.8  | 16.4 | 5.4 | 0.3 | 6.7 | 0.0 | 4.0 | 0.59987954  | 189.5  | 7.5  | 227.1  | 13.7 | 637.1  | 116.0 | 70.3  |
| Spot 230 | 250  | 10221.7  | 2.7  | 12.2 | 3.9 | 2.2 | 5.7 | 0.2 | 4.1 | 0.731665679 | 1153.5 | 43.8 | 1180.4 | 39.6 | 1230.1 | 75.9  | 6.2   |
| Spot 231 | 526  | 8707.3   | 1.7  | 18.5 | 2.2 | 0.3 | 2.9 | 0.0 | 1.8 | 0.625711111 | 274.3  | 4.8  | 279.5  | 7.0  | 323.2  | 50.7  | 15.1  |
| Spot 232 | 686  | 35892.4  | 1.4  | 18.2 | 1.9 | 0.3 | 2.2 | 0.0 | 1.0 | 0.462887015 | 276.6  | 2.7  | 291.3  | 5.5  | 410.7  | 43.1  | 32.6  |
| Spot 233 | 241  | 5624.9   | 4.0  | 18.1 | 1.6 | 0.4 | 2.5 | 0.1 | 1.9 | 0.749153952 | 327.2  | 6.0  | 327.2  | 7.0  | 327.7  | 37.6  | 0.2   |
| Spot 234 | 1100 | 87418.8  | 4.7  | 12.8 | 0.8 | 2.1 | 1.5 | 0.2 | 1.3 | 0.86159824  | 1128.1 | 13.2 | 1140.6 | 10.2 | 1164.4 | 14.9  | 3.1   |
| Spot 235 | 357  | 42989.4  | 0.9  | 13.9 | 1.5 | 1.6 | 2.2 | 0.2 | 1.6 | 0.72392496  | 986.7  | 14.5 | 989.4  | 13.8 | 995.2  | 30.7  | 0.9   |
| Spot 237 | 476  | 29840.0  | 3.5  | 12.9 | 1.0 | 2.1 | 2.0 | 0.2 | 1.7 | 0.84883966  | 1158.5 | 17.7 | 1149.3 | 13.6 | 1132.1 | 20.7  | -2.3  |
| Spot 239 | 323  | 23165.4  | 2.0  | 13.9 | 1.0 | 1.6 | 2.1 | 0.2 | 1.9 | 0.888546884 | 948.6  | 16.5 | 960.4  | 13.1 | 987.6  | 19.7  | 4.0   |
| Spot 240 | 253  | 99915.5  | 1.7  | 17.8 | 2.7 | 0.3 | 3.4 | 0.0 | 2.1 | 0.612658426 | 261.8  | 5.4  | 284.2  | 8.4  | 472.8  | 59.6  | 44.6  |
| Spot 243 | 704  | 9324.2   | 1.7  | 18.6 | 1.3 | 0.3 | 2.3 | 0.0 | 1.6 | 0.661258418 | 276.7  | 4.2  | 279.7  | 5.7  | 305.0  | 40.2  | 9.3   |
| Spot 244 | 1487 | 40266.0  | 3.6  | 12.3 | 0.9 | 2.0 | 1.5 | 0.2 | 1.2 | 0.77629438  | 1044.0 | 11.2 | 1105.4 | 10.1 | 1228.2 | 18.5  | 15.0  |
| Spot 245 | 501  | 25018.7  | 2.4  | 10.9 | 0.7 | 3.0 | 1.6 | 0.2 | 1.4 | 0.882860113 | 1378.3 | 17.1 | 1413.2 | 11.9 | 1466.4 | 13.9  | 6.0   |
| Spot 246 | 348  | 10243.7  | 0.7  | 19.1 | 2.8 | 0.3 | 3.5 | 0.0 | 2.1 | 0.600633166 | 261.6  | 5.4  | 260.7  | 8.1  | 253.5  | 64.8  | -3.2  |
| Spot 247 | 704  | 3918.9   | 8.8  | 18.9 | 2.0 | 0.2 | 3.0 | 0.0 | 2.1 | 0.693849466 | 228.4  | 4.7  | 223.0  | 6.0  | 166.8  | 50.5  | -36.9 |
| Spot 248 | 1802 | 45694.7  | 7.0  | 12.9 | 0.8 | 2.1 | 1.5 | 0.2 | 1.2 | 0.834054742 | 1158.5 | 13.0 | 1149.0 | 10.1 | 1131.0 | 16.1  | -2.4  |
| Spot 249 | 1099 | 14458.3  | 8.1  | 19.7 | 1.3 | 0.3 | 1.9 | 0.0 | 1.3 | 0.673306844 | 236.1  | 2.9  | 232.4  | 3.9  | 195.0  | 32.0  | -21.0 |
| Spot 251 | 211  | 14514.4  | 2.2  | 11.4 | 1.2 | 2.7 | 2.3 | 0.2 | 2.0 | 0.841819726 | 1303.5 | 23.2 | 1329.8 | 17.3 | 1372.3 | 24.2  | 5.0   |
| Spot 252 | 316  | 924233.1 | 2.7  | 11.8 | 1.1 | 2.6 | 1.7 | 0.2 | 1.4 | 0.788578781 | 1286.3 | 16.1 | 1297.2 | 12.8 | 1315.2 | 20.8  | 2.2   |
| Spot 253 | 198  | 11761.0  | 2.7  | 14.2 | 1.3 | 1.5 | 1.8 | 0.2 | 1.2 | 0.656604547 | 931.9  | 10.3 | 928.8  | 11.0 | 921.4  | 28.1  | -1.1  |
| Spot 254 | 417  | 2277.1   | 1.1  | 18.5 | 1.1 | 0.3 | 2.1 | 0.0 | 1.7 | 0.791534703 | 273.3  | 4.5  | 255.4  | 4.8  | 93.6   | 30.7  | ####  |
| Spot 255 | 304  | 20802.3  | 1.4  | 12.7 | 1.0 | 2.2 | 1.6 | 0.2 | 1.2 | 0.782082773 | 1168.3 | 13.1 | 1165.1 | 10.8 | 1159.0 | 19.3  | -0.8  |
| Spot 256 | 1443 | 56692.0  | 3.4  | 12.6 | 1.0 | 2.3 | 1.5 | 0.2 | 1.2 | 0.787803033 | 1218.1 | 13.5 | 1206.1 | 10.9 | 1184.8 | 18.8  | -2.8  |
| Spot 259 | 371  | 13118.9  | 1.9  | 13.7 | 1.1 | 1.7 | 2.0 | 0.2 | 1.7 | 0.83202172  | 1016.8 | 15.9 | 1011.4 | 13.0 | 999.7  | 22.9  | -1.7  |
| Spot 260 | 666  | 35211.3  | 1.2  | 20.1 | 1.4 | 0.3 | 2.1 | 0.0 | 1.5 | 0.716006698 | 230.9  | 3.4  | 227.2  | 4.2  | 188.5  | 33.6  | -22.5 |
| Spot 261 | 633  | 36379.8  | 2.5  | 8.8  | 0.8 | 4.3 | 1.9 | 0.3 | 1.7 | 0.893849938 | 1564.0 | 23.4 | 1698.0 | 15.6 | 1867.6 | 15.3  | 16.3  |
| Spot 262 | 401  | 28085.2  | 3.5  | 11.6 | 0.8 | 2.8 | 1.5 | 0.2 | 1.2 | 0.822823017 | 1340.1 | 14.7 | 1343.9 | 11.0 | 1350.1 | 16.2  | 0.7   |
| Spot 263 | 320  | 9372.4   | 0.7  | 16.9 | 1.3 | 0.8 | 1.8 | 0.1 | 1.2 | 0.662666501 | 579.4  | 6.7  | 569.8  | 7.9  | 531.4  | 29.9  | -9.0  |
| Spot 264 | 957  | 5747.3   | 3.8  | 19.2 | 1.6 | 0.3 | 3.3 | 0.0 | 1.3 | 0.395713798 | 288.8  | 3.7  | 278.8  | 8.0  | 195.4  | 70.0  | -47.8 |
| Spot 265 | 127  | 356343.5 | 0.9  | 12.9 | 1.0 | 2.1 | 2.6 | 0.2 | 2.4 | 0.914638353 | 1155.3 | 24.9 | 1151.0 | 17.7 | 1143.0 | 20.7  | -1.1  |
| Spot 266 | 683  | 8401.8   | 5.0  | 18.6 | 2.5 | 0.3 | 3.7 | 0.0 | 2.6 | 0.699339711 | 237.6  | 6.1  | 244.0  | 8.1  | 305.4  | 60.6  | 22.2  |
| Spot 267 | 77   | 4043.2   | 2.3  | 14.3 | 1.7 | 1.3 | 3.2 | 0.1 | 2.7 | 0.835959959 | 829.4  | 20.9 | 831.2  | 18.2 | 836.2  | 36.7  | 0.8   |
| Spot 268 | 176  | 8095.8   | 3.4  | 14.3 | 1.5 | 1.4 | 2.3 | 0.2 | 1.7 | 0.757566954 | 907.8  | 14.5 | 904.5  | 13.6 | 896.4  | 30.5  | -1.3  |
| Spot 269 | 465  | 28578.2  | 4.0  | 12.5 | 0.9 | 2.2 | 1.4 | 0.2 | 1.1 | 0.785830859 | 1188.3 | 12.0 | 1190.9 | 9.9  | 1195.8 | 17.2  | 0.6   |
| Spot 270 | 147  | 15136.6  | 1.2  | 15.4 | 7.5 | 0.3 | 9.2 | 0.0 | 5.2 | 0.570774147 | 187.7  | 9.7  | 237.2  | 19.4 | 760.7  | 159.1 | 75.3  |
| Spot 271 | 90   | 5211.6   | 1.9  | 12.4 | 1.9 | 2.0 | 3.3 | 0.2 | 2.2 | 0.681697891 | 1085.2 | 22.1 | 1110.1 | 21.9 | 1159.2 | 47.2  | 6.4   |
| Spot 272 | 602  | 115278.1 | 2.1  | 11.5 | 1.1 | 2.6 | 2.6 | 0.2 | 2.4 | 0.904918499 | 1273.6 | 27.7 | 1309.5 | 19.5 | 1368.7 | 21.7  | 6.9   |

|                         |      |          |      |      |     |     |      |     |      |             |        |       |        |      |        |       |       |
|-------------------------|------|----------|------|------|-----|-----|------|-----|------|-------------|--------|-------|--------|------|--------|-------|-------|
| Spot 273                | 509  | 78644.4  | 4.4  | 12.5 | 0.9 | 2.2 | 1.6  | 0.2 | 1.3  | 0.811551344 | 1167.7 | 14.0  | 1184.1 | 11.3 | 1214.2 | 18.6  | 3.8   |
| Spot 274                | 1370 | 28927.1  | 0.8  | 19.2 | 1.1 | 0.3 | 1.9  | 0.0 | 1.5  | 0.788770345 | 273.2  | 4.0   | 274.6  | 4.5  | 286.8  | 26.4  | 4.7   |
| Spot 276                | 114  | 5156.1   | 2.6  | 13.8 | 2.8 | 1.4 | 4.4  | 0.1 | 3.3  | 0.74496406  | 846.7  | 25.9  | 870.5  | 25.6 | 931.5  | 60.0  | 9.1   |
| Spot 277                | 621  | 7075.3   | 1.8  | 19.7 | 0.9 | 0.3 | 1.6  | 0.0 | 1.3  | 0.808666011 | 270.9  | 3.5   | 259.1  | 3.7  | 153.2  | 22.3  | -76.8 |
| Spot 278                | 144  | 30510.7  | 1.7  | 12.2 | 2.6 | 2.1 | 3.0  | 0.2 | 1.5  | 0.505817156 | 1114.5 | 15.7  | 1164.5 | 21.1 | 1258.7 | 51.3  | 11.5  |
| Spot 279                | 1149 | 69389.8  | 2.7  | 12.7 | 1.0 | 2.1 | 1.4  | 0.2 | 1.0  | 0.707561984 | 1127.5 | 10.5  | 1147.9 | 9.9  | 1186.6 | 20.0  | 5.0   |
| Spot 280                | 126  | 8439.4   | 2.1  | 12.7 | 1.3 | 2.0 | 1.9  | 0.2 | 1.2  | 0.640146543 | 1120.2 | 12.6  | 1129.8 | 13.0 | 1148.3 | 29.1  | 2.4   |
| Spot 281                | 811  | 56733.6  | 2.3  | 12.3 | 0.9 | 2.2 | 1.7  | 0.2 | 1.4  | 0.828363925 | 1159.7 | 14.8  | 1186.5 | 11.8 | 1235.6 | 18.5  | 6.1   |
| Spot 283                | 487  | 34674.3  | 1.1  | 17.1 | 1.5 | 0.6 | 2.2  | 0.1 | 1.6  | 0.728931812 | 456.3  | 7.0   | 471.2  | 8.3  | 544.9  | 32.9  | 16.3  |
| Spot 285                | 470  | 5536.6   | 4.1  | 16.8 | 1.2 | 0.6 | 2.1  | 0.1 | 1.7  | 0.801548945 | 496.2  | 8.0   | 496.6  | 8.2  | 498.9  | 27.6  | 0.5   |
| Spot 287                | 625  | 687.5    | 2.3  | 17.1 | 4.5 | 0.1 | 5.6  | 0.0 | 3.2  | 0.568114443 | 69.3   | 2.2   | 54.3   | 3.0  | NA     | NA    |       |
| Spot 289                | 1851 | 18417.0  | 2.3  | 19.7 | 2.0 | 0.1 | 2.8  | 0.0 | 2.0  | 0.719737507 | 72.9   | 1.5   | 77.3   | 2.1  | 212.7  | 45.4  | 65.7  |
| Spot 290                | 196  | 32108.3  | 1.6  | 7.8  | 0.8 | 6.5 | 1.4  | 0.4 | 1.1  | 0.806232829 | 2022.2 | 19.3  | 2048.8 | 12.1 | 2075.8 | 14.3  | 2.6   |
| Spot 291                | 314  | 375210.8 | 3.3  | 11.8 | 1.6 | 2.6 | 2.5  | 0.2 | 2.0  | 0.776713822 | 1279.4 | 22.8  | 1294.0 | 18.5 | 1318.2 | 30.9  | 2.9   |
| Spot 292                | 1471 | 35374.4  | 4.2  | 18.2 | 1.3 | 0.3 | 2.0  | 0.0 | 1.5  | 0.757958687 | 267.5  | 4.0   | 282.9  | 5.0  | 412.2  | 29.4  | 35.1  |
| Spot 293                | 391  | 10561.3  | 1.5  | 16.5 | 2.3 | 0.6 | 3.2  | 0.1 | 2.3  | 0.705081103 | 483.5  | 10.6  | 501.9  | 12.8 | 587.0  | 49.9  | 17.6  |
| Spot 294                | 225  | 7685.7   | 5.2  | 16.7 | 2.8 | 0.5 | 4.0  | 0.1 | 2.5  | 0.633831482 | 377.0  | 9.2   | 402.2  | 13.1 | 549.9  | 66.8  | 31.5  |
| Spot 296                | 136  | 12784.3  | 1.0  | 12.8 | 2.2 | 1.7 | 3.7  | 0.2 | 3.0  | 0.795391395 | 952.7  | 26.2  | 1011.9 | 23.8 | 1142.3 | 44.8  | 16.6  |
| Spot 297                | 1297 | 39594.7  | 1.3  | 9.6  | 1.4 | 3.9 | 2.2  | 0.3 | 1.6  | 0.751627949 | 1550.3 | 22.3  | 1615.6 | 17.4 | 1701.7 | 26.2  | 8.9   |
| Spot 298                | 747  | 132671.1 | 3.4  | 13.1 | 1.2 | 2.0 | 2.0  | 0.2 | 1.7  | 0.819090774 | 1137.4 | 17.4  | 1131.2 | 13.9 | 1119.3 | 23.3  | -1.6  |
| Spot 300                | 966  | 17217.2  | 1.4  | 17.3 | 1.3 | 0.5 | 2.2  | 0.1 | 1.7  | 0.794723123 | 389.2  | 6.5   | 406.9  | 7.3  | 508.4  | 29.0  | 23.4  |
| Spot 301                | 651  | 28124.1  | 3.6  | 10.7 | 2.7 | 2.7 | 3.0  | 0.2 | 1.4  | 0.477668934 | 1233.1 | 16.2  | 1334.6 | 22.4 | 1501.4 | 50.2  | 17.9  |
| Spot 302                | 326  | 10773.3  | 3.4  | 13.5 | 0.9 | 1.8 | 1.6  | 0.2 | 1.4  | 0.846567743 | 1041.5 | 13.1  | 1035.7 | 10.5 | 1023.5 | 17.4  | -1.8  |
| Spot 303                | 688  | 56269.3  | 9.1  | 18.8 | 2.0 | 0.3 | 2.4  | 0.0 | 1.3  | 0.548295832 | 235.4  | 3.1   | 245.7  | 5.3  | 344.8  | 46.0  | 31.7  |
| Spot 304                | 167  | 51694.4  | 1.2  | 13.9 | 1.6 | 1.7 | 2.3  | 0.2 | 1.7  | 0.717110036 | 1033.4 | 16.0  | 1020.1 | 15.1 | 991.7  | 33.2  | -4.2  |
| Spot 305                | 695  | 34204.1  | 2.7  | 12.7 | 2.4 | 0.8 | 3.0  | 0.1 | 1.8  | 0.594819851 | 464.8  | 8.0   | 605.0  | 13.7 | 1172.4 | 48.0  | 60.4  |
| Spot 307                | 717  | 34784.6  | 18.1 | 13.7 | 0.9 | 1.7 | 1.5  | 0.2 | 1.2  | 0.811377961 | 981.9  | 11.3  | 993.9  | 9.7  | 1020.4 | 18.1  | 3.8   |
| Spot 308                | 165  | 4773.6   | 0.7  | 19.3 | 5.1 | 0.2 | 7.4  | 0.0 | 5.4  | 0.727532707 | 204.9  | 10.8  | 201.7  | 13.5 | 164.3  | 118.6 | -24.7 |
| Spot 309                | 196  | 9123.0   | 1.9  | 13.9 | 3.2 | 1.4 | 3.8  | 0.1 | 2.1  | 0.544367797 | 890.1  | 17.4  | 909.0  | 23.1 | 955.1  | 66.0  | 6.8   |
| Spot 310                | 131  | 10015.7  | 3.5  | 12.8 | 1.8 | 1.9 | 2.5  | 0.2 | 1.5  | 0.616170694 | 1070.1 | 14.9  | 1093.5 | 16.5 | 1140.3 | 38.5  | 6.2   |
| Spot 311                | 417  | 4885.4   | 1.1  | 17.1 | 2.3 | 0.5 | 4.3  | 0.1 | 2.4  | 0.564234314 | 438.0  | 10.3  | 441.8  | 15.4 | 461.5  | 78.7  | 5.1   |
| Spot 312                | 698  | 30039.3  | 1.4  | 19.5 | 1.0 | 0.3 | 1.4  | 0.0 | 1.0  | 0.68905515  | 269.2  | 2.6   | 268.4  | 3.4  | 261.4  | 23.9  | -3.0  |
| Spot 313                | 1260 | 113917.5 | 2.4  | 12.4 | 1.0 | 2.1 | 1.6  | 0.2 | 1.2  | 0.785341115 | 1131.9 | 12.7  | 1164.7 | 10.8 | 1226.2 | 19.0  | 7.7   |
| Spot 314                | 463  | 15514.8  | 2.0  | 19.2 | 1.7 | 0.3 | 2.4  | 0.0 | 1.7  | 0.71162806  | 284.4  | 4.8   | 284.0  | 6.0  | 280.5  | 39.2  | -1.4  |
| Spot 315                | 301  | 38436.4  | 13.4 | 13.2 | 1.0 | 1.6 | 2.8  | 0.2 | 2.6  | 0.925587593 | 905.1  | 21.6  | 964.2  | 17.2 | 1101.4 | 20.9  | 17.8  |
| Run 2 NM8A (discordant) |      |          |      |      |     |     |      |     |      |             |        |       |        |      |        |       |       |
| Spot 1                  | 1283 | 40478.1  | 4.5  | 6.1  | 0.9 | 4.7 | 2.7  | 0.2 | 2.6  | 0.944988191 | 1209.2 | 28.3  | 1761.6 | 22.7 | 2498.3 | 14.9  | 51.6  |
| Spot 103                | 225  | 23668.8  | 1.4  | 13.1 | 2.9 | 2.1 | 4.3  | 0.2 | 3.2  | 0.736417765 | 1176.5 | 33.9  | 1150.5 | 29.5 | 1101.9 | 57.9  | -6.8  |
| Spot 106                | 49   | 16823.3  | 2.9  | 13.9 | 2.8 | 1.3 | 5.4  | 0.1 | 4.6  | 0.860251322 | 787.6  | 34.4  | 842.3  | 30.9 | 989.6  | 56.0  | 20.4  |
| Spot 12                 | 458  | 3570.1   | 1.3  | 20.6 | 2.8 | 0.3 | 6.9  | 0.0 | 6.3  | 0.912108819 | 278.2  | 17.0  | 262.0  | 15.9 | 119.6  | 66.3  | ####  |
| Spot 121                | 2397 | 135660.8 | 24.5 | 13.8 | 0.8 | 2.0 | 1.4  | 0.2 | 1.2  | 0.810776541 | 1148.5 | 12.2  | 1099.9 | 9.6  | 1004.8 | 17.0  | -14.3 |
| Spot 123                | 2268 | 31807.7  | 13.1 | 10.0 | 1.1 | 2.2 | 2.1  | 0.2 | 1.8  | 0.857928572 | 958.3  | 15.7  | 1186.0 | 14.4 | 1628.9 | 19.6  | 41.2  |
| Spot 138                | 966  | 59616.5  | 8.9  | 29.5 | 1.6 | 0.3 | 30.0 | 0.1 | 30.0 | 0.998577791 | 348.8  | 101.9 | 234.7  | 63.0 | NA     | NA    |       |

|          |      |           |      |      |      |     |      |     |      |             |        |       |        |       |        |       |       |
|----------|------|-----------|------|------|------|-----|------|-----|------|-------------|--------|-------|--------|-------|--------|-------|-------|
| Spot 145 | 211  | 2202.9    | 4.9  | 11.2 | 5.8  | 2.0 | 6.4  | 0.2 | 2.6  | 0.413376682 | 991.1  | 24.3  | 1131.0 | 43.7  | 1410.4 | 111.6 | 29.7  |
| Spot 154 | 1948 | 424047.7  | 52.0 | 11.1 | 0.9  | 1.9 | 1.4  | 0.2 | 1.1  | 0.793660327 | 930.8  | 9.8   | 1089.4 | 9.5   | 1421.8 | 16.6  | 34.5  |
| Spot 156 | 170  | 4375.6    | 0.8  | 26.0 | 4.2  | 0.2 | 30.3 | 0.0 | 30.0 | 0.990156145 | 233.2  | 68.7  | 180.9  | 50.2  | NA     | NA    |       |
| Spot 157 | 880  | 4594.8    | 3.1  | 12.7 | 4.1  | 1.3 | 4.3  | 0.1 | 1.2  | 0.268504819 | 724.7  | 7.9   | 840.5  | 24.6  | 1160.0 | 82.3  | 37.5  |
| Spot 16  | 86   | 1734.3    | 1.3  | 14.1 | 2.8  | 1.7 | 3.5  | 0.2 | 2.0  | 0.576623193 | 1029.1 | 19.0  | 1006.3 | 22.1  | 957.1  | 57.7  | -7.5  |
| Spot 161 | 231  | 15410.8   | 2.4  | 14.1 | 3.6  | 2.1 | 11.7 | 0.2 | 11.1 | 0.951091625 | 1233.2 | 124.4 | 1135.7 | 79.8  | 953.7  | 73.6  | -29.3 |
| Spot 170 | 554  | 99737.4   | 4.6  | 13.8 | 1.5  | 1.2 | 2.3  | 0.1 | 1.7  | 0.749323796 | 708.9  | 11.5  | 783.7  | 12.5  | 1002.7 | 30.8  | 29.3  |
| Spot 175 | 256  | 11220.0   | 3.8  | 13.2 | 3.6  | 2.1 | 6.0  | 0.2 | 4.8  | 0.804864508 | 1193.3 | 52.5  | 1155.7 | 41.3  | 1086.0 | 71.2  | -9.9  |
| Spot 18  | 670  | 43756.7   | 1.7  | 20.7 | 2.7  | 1.9 | 17.2 | 0.3 | 17.0 | 0.987620744 | 1624.9 | 244.0 | 1084.2 | 115.0 | 113.9  | 63.6  | ####  |
| Spot 180 | 97   | 3632.8    | 2.7  | 14.9 | 3.5  | 1.4 | 4.0  | 0.1 | 1.9  | 0.479807785 | 887.2  | 16.0  | 875.0  | 23.6  | 844.5  | 73.6  | -5.1  |
| Spot 185 | 2350 | 85823.4   | 8.0  | 14.3 | 0.9  | 1.6 | 1.5  | 0.2 | 1.2  | 0.82367073  | 1010.2 | 11.6  | 983.9  | 9.5   | 925.9  | 17.6  | -9.1  |
| Spot 192 | 949  | 64196.5   | 3.5  | 13.3 | 1.3  | 1.3 | 2.0  | 0.1 | 1.5  | 0.761071672 | 750.6  | 10.7  | 838.5  | 11.3  | 1079.1 | 25.7  | 30.4  |
| Spot 213 | 140  | 934.9     | 1.2  | 34.2 | 5.7  | 0.2 | 8.9  | 0.1 | 6.9  | 0.768120718 | 377.4  | 25.1  | 221.0  | 17.7  | NA     | NA    | ####  |
| Spot 219 | 123  | 20985.2   | 1.4  | 15.9 | 4.1  | 1.3 | 8.9  | 0.2 | 7.9  | 0.887139916 | 904.3  | 66.6  | 849.0  | 51.3  | 707.3  | 87.4  | -27.9 |
| Spot 236 | 89   | 3232.1    | 3.1  | 15.2 | 3.6  | 1.3 | 5.4  | 0.1 | 4.0  | 0.743349589 | 882.9  | 33.1  | 860.1  | 31.4  | 801.6  | 75.7  | -10.1 |
| Spot 238 | 2618 | 480607.5  | 0.8  | 13.7 | 0.8  | 1.9 | 1.2  | 0.2 | 0.9  | 0.767708987 | 1128.9 | 9.5   | 1092.1 | 8.0   | 1019.4 | 15.5  | -10.7 |
| Spot 241 | 58   | 2874.3    | 1.3  | 13.7 | 2.0  | 1.9 | 2.6  | 0.2 | 1.6  | 0.630510875 | 1121.8 | 17.0  | 1085.6 | 17.4  | 1013.9 | 41.1  | -10.6 |
| Spot 242 | 803  | 338.0     | 2.9  | 5.1  | 32.8 | 0.9 | 33.1 | 0.0 | 4.2  | 0.127933715 | 199.7  | 8.3   | 629.0  | 156.4 | 2808.3 | 553.9 | 92.9  |
| Spot 250 | 122  | 16480.0   | 0.3  | 13.3 | 2.5  | 1.4 | 4.0  | 0.1 | 3.1  | 0.772166465 | 831.8  | 23.8  | 901.5  | 23.6  | 1076.5 | 50.4  | 22.7  |
| Spot 257 | 220  | 5840.8    | 1.2  | 23.8 | 3.6  | 0.2 | 15.5 | 0.0 | 15.1 | 0.972659886 | 190.4  | 28.3  | 162.7  | 23.3  | NA     | NA    |       |
| Spot 258 | 173  | 13996.8   | 3.6  | 13.4 | 1.9  | 2.0 | 2.8  | 0.2 | 2.1  | 0.751587234 | 1123.1 | 22.0  | 1098.8 | 19.1  | 1051.1 | 37.7  | -6.8  |
| Spot 275 | 84   | 6278.2    | 2.0  | 13.2 | 1.6  | 2.1 | 2.5  | 0.2 | 2.0  | 0.785904688 | 1195.8 | 21.6  | 1158.4 | 17.4  | 1089.0 | 31.1  | -9.8  |
| Spot 282 | 781  | 7784.9    | 0.8  | 20.6 | 2.7  | 0.3 | 8.9  | 0.0 | 8.4  | 0.95273762  | 280.9  | 23.2  | 264.9  | 20.6  | 125.5  | 63.3  | ####  |
| Spot 284 | 83   | 5496.8    | 0.9  | 14.5 | 4.2  | 1.5 | 8.4  | 0.2 | 7.3  | 0.86968868  | 938.7  | 64.1  | 927.1  | 51.3  | 899.7  | 85.9  | -4.3  |
| Spot 286 | 1808 | 20193.1   | 17.1 | 25.6 | 1.8  | 0.3 | 29.9 | 0.0 | 29.9 | 0.998130199 | 303.3  | 88.5  | 234.2  | 62.7  | NA     | NA    |       |
| Spot 288 | 273  | 22216.7   | 1.9  | 20.7 | 2.7  | 0.3 | 18.3 | 0.0 | 18.0 | 0.988969379 | 296.6  | 52.3  | 276.8  | 44.2  | 112.8  | 63.8  | ####  |
| Spot 295 | 607  | 41209.9   | 2.2  | 6.5  | 1.0  | 6.5 | 1.9  | 0.3 | 1.6  | 0.848676968 | 1725.0 | 24.7  | 2049.7 | 16.9  | 2394.2 | 17.3  | 28.0  |
| Spot 299 | 337  | 332.7     | 2.2  | 4.9  | 16.6 | 8.5 | 18.0 | 0.3 | 7.0  | 0.388377772 | 1707.9 | 105.2 | 2287.9 | 165.4 | 2855.8 | 272.8 | 40.2  |
| Spot 30  | 86   | 1936.6    | 1.2  | 23.0 | 10.6 | 0.2 | 30.5 | 0.0 | 28.6 | 0.937523225 | 251.8  | 70.7  | 217.1  | 59.8  | NA     | NA    |       |
| Spot 306 | 283  | 41200.8   | 5.1  | 5.4  | 1.6  | 5.5 | 4.3  | 0.2 | 4.0  | 0.930377403 | 1271.5 | 46.4  | 1908.1 | 37.2  | 2694.2 | 26.2  | 52.8  |
| Spot 53  | 2440 | 216863.6  | 36.9 | 14.4 | 1.6  | 1.7 | 2.4  | 0.2 | 1.8  | 0.754847348 | 1050.9 | 17.6  | 1005.9 | 15.4  | 909.2  | 32.5  | -15.6 |
| Spot 65  | 468  | 6273.4    | 2.0  | 32.2 | 3.4  | 0.1 | 30.2 | 0.0 | 30.0 | 0.993679468 | 172.3  | 51.0  | 111.4  | 31.9  | NA     | NA    |       |
| Spot 75  | 1080 | 23394.2   | 2.7  | 12.6 | 1.0  | 1.7 | 2.1  | 0.2 | 1.9  | 0.8715961   | 933.6  | 16.1  | 1008.9 | 13.6  | 1176.5 | 20.7  | 20.6  |
| Spot 83  | 115  | 527571.1  | 1.3  | 12.5 | 4.1  | 1.7 | 5.1  | 0.2 | 3.0  | 0.596382473 | 920.1  | 25.9  | 1003.8 | 32.3  | 1191.3 | 80.2  | 22.8  |
| Spot 91  | 1777 | 1571922.4 | 15.1 | 8.5  | 0.9  | 3.4 | 1.8  | 0.2 | 1.6  | 0.872629151 | 1237.9 | 17.8  | 1512.7 | 14.3  | 1921.7 | 15.9  | 35.6  |
| Spot 96  | 431  | 38280.2   | 5.9  | 11.8 | 1.0  | 2.8 | 1.8  | 0.2 | 1.5  | 0.842388581 | 1389.9 | 19.0  | 1357.6 | 13.5  | 1307.1 | 18.9  | -6.3  |
| Run 3    |      |           |      |      |      |     |      |     |      |             |        |       |        |       |        |       |       |
| Spot 1   | 694  | 12977.1   | 11.9 | 20.2 | 0.9  | 0.3 | 1.9  | 0.0 | 1.5  | 0.758160384 | 248.2  | 3.5   | 237.0  | 4.0   | 127.6  | 29.4  | -94.5 |
| Spot 2   | 147  | 2474.8    | 1.7  | 18.3 | 3.4  | 0.2 | 5.7  | 0.0 | 2.5  | 0.431696561 | 168.8  | 4.1   | 166.9  | 8.8   | 140.4  | 121.6 | -20.2 |
| Spot 3   | 217  | 6916.5    | 1.0  | 19.1 | 2.6  | 0.3 | 2.9  | 0.0 | 1.3  | 0.46226276  | 257.0  | 3.4   | 253.0  | 6.5   | 215.8  | 59.6  | -19.1 |
| Spot 4   | 287  | 9536.5    | 1.7  | 19.1 | 1.5  | 0.3 | 2.1  | 0.0 | 1.3  | 0.634866893 | 252.6  | 3.3   | 251.6  | 4.7   | 242.5  | 37.6  | -4.1  |
| Spot 5   | 721  | 28064.2   | 0.7  | 20.7 | 1.2  | 0.2 | 1.7  | 0.0 | 1.2  | 0.698019814 | 157.5  | 1.8   | 153.8  | 2.4   | 97.6   | 28.6  | -61.3 |
| Spot 6   | 488  | 37332.0   | 11.9 | 12.5 | 0.8  | 2.2 | 1.5  | 0.2 | 1.3  | 0.842048307 | 1158.4 | 13.8  | 1168.8 | 10.8  | 1188.3 | 16.5  | 2.5   |

|         |     |           |     |      |      |     |      |     |     |             |        |      |        |      |        |       |       |
|---------|-----|-----------|-----|------|------|-----|------|-----|-----|-------------|--------|------|--------|------|--------|-------|-------|
| Spot 7  | 391 | 56325.3   | 1.1 | 19.2 | 1.2  | 0.3 | 1.8  | 0.0 | 1.4 | 0.760239921 | 261.0  | 3.5  | 263.8  | 4.1  | 289.2  | 26.5  | 9.8   |
| Spot 8  | 182 | 2066.6    | 0.9 | 19.5 | 1.7  | 0.2 | 6.7  | 0.0 | 1.4 | 0.210483797 | 199.1  | 2.8  | 177.8  | 10.9 | NA     | NA    |       |
| Spot 9  | 71  | 39327.0   | 1.5 | 13.4 | 1.3  | 1.7 | 2.0  | 0.2 | 1.5 | 0.761142706 | 973.7  | 13.9 | 994.9  | 12.8 | 1042.0 | 26.4  | 6.5   |
| Spot 10 | 127 | 8198.4    | 2.1 | 19.2 | 1.5  | 0.4 | 2.7  | 0.1 | 2.0 | 0.752649085 | 340.3  | 6.6  | 322.0  | 7.3  | 192.1  | 40.6  | -77.1 |
| Spot 11 | 130 | 16406.9   | 2.0 | 9.6  | 0.8  | 4.2 | 1.7  | 0.3 | 1.5 | 0.888924139 | 1678.7 | 22.4 | 1674.0 | 14.0 | 1668.1 | 14.5  | -0.6  |
| Spot 12 | 508 | 305095.9  | 2.1 | 14.1 | 0.6  | 1.6 | 1.5  | 0.2 | 1.4 | 0.916766113 | 964.4  | 12.2 | 959.9  | 9.3  | 949.5  | 12.2  | -1.6  |
| Spot 14 | 407 | 23230.3   | 7.4 | 16.7 | 0.8  | 0.8 | 1.7  | 0.1 | 1.5 | 0.866380813 | 599.9  | 8.3  | 593.6  | 7.5  | 569.3  | 18.2  | -5.4  |
| Spot 15 | 71  | 15829.6   | 1.9 | 18.6 | 3.6  | 0.3 | 4.2  | 0.0 | 2.1 | 0.509676048 | 275.9  | 5.7  | 279.7  | 10.2 | 311.5  | 81.6  | 11.5  |
| Spot 16 | 543 | 14709.6   | 2.0 | 19.1 | 1.3  | 0.3 | 1.8  | 0.0 | 1.1 | 0.629292683 | 274.6  | 3.1  | 271.6  | 4.3  | 245.6  | 32.4  | -11.8 |
| Spot 17 | 459 | 9307.1    | 1.9 | 19.3 | 1.5  | 0.3 | 2.3  | 0.0 | 1.3 | 0.548157533 | 280.6  | 3.5  | 272.0  | 5.5  | 198.5  | 44.7  | -41.4 |
| Spot 20 | 305 | 42970.1   | 6.5 | 12.8 | 0.9  | 1.8 | 1.8  | 0.2 | 1.5 | 0.862556631 | 1015.5 | 14.4 | 1054.4 | 11.7 | 1135.8 | 17.9  | 10.6  |
| Spot 21 | 412 | 12551.5   | 1.2 | 19.0 | 1.0  | 0.3 | 1.8  | 0.0 | 1.3 | 0.707608194 | 274.8  | 3.5  | 271.9  | 4.3  | 247.2  | 29.6  | -11.2 |
| Spot 22 | 125 | 13569.9   | 1.0 | 20.3 | 2.6  | 0.2 | 4.1  | 0.0 | 3.2 | 0.782293344 | 189.9  | 6.0  | 183.5  | 6.9  | 101.1  | 60.4  | -87.9 |
| Spot 23 | 174 | 39337.7   | 5.6 | 11.1 | 0.8  | 3.0 | 1.5  | 0.2 | 1.2 | 0.82521729  | 1396.0 | 15.6 | 1401.1 | 11.5 | 1408.8 | 16.3  | 0.9   |
| Spot 24 | 23  | 984.4     | 1.1 | 10.0 | 11.5 | 0.3 | 13.2 | 0.0 | 4.8 | 0.364539919 | 155.0  | 7.4  | 255.5  | 29.9 | 1321.3 | 239.6 | 88.3  |
| Spot 25 | 444 | 25044.7   | 9.3 | 18.0 | 1.5  | 0.5 | 3.2  | 0.1 | 2.8 | 0.886325922 | 443.8  | 12.2 | 437.5  | 11.4 | 404.4  | 33.2  | -9.8  |
| Spot 27 | 434 | 2229.3    | 4.6 | 21.0 | 2.9  | 0.1 | 3.7  | 0.0 | 2.0 | 0.551274127 | 67.8   | 1.4  | 58.8   | 2.1  | NA     | NA    |       |
| Spot 28 | 378 | 19153.5   | 2.1 | 19.8 | 1.3  | 0.3 | 2.0  | 0.0 | 1.4 | 0.728126719 | 255.1  | 3.6  | 247.3  | 4.3  | 174.0  | 31.2  | -46.6 |
| Spot 29 | 386 | 158626.9  | 3.2 | 10.7 | 1.1  | 3.4 | 1.9  | 0.3 | 1.5 | 0.809798398 | 1534.1 | 20.5 | 1512.0 | 14.6 | 1481.0 | 20.7  | -3.6  |
| Spot 30 | 356 | 6345.6    | 1.1 | 19.2 | 1.1  | 0.3 | 2.2  | 0.0 | 1.4 | 0.662664154 | 283.9  | 4.0  | 272.9  | 5.2  | 179.2  | 38.2  | -58.4 |
| Spot 31 | 348 | 42231.9   | 1.5 | 11.9 | 0.7  | 2.4 | 1.5  | 0.2 | 1.4 | 0.896012242 | 1228.0 | 15.3 | 1247.1 | 11.0 | 1280.2 | 13.2  | 4.1   |
| Spot 32 | 107 | 43872.7   | 1.0 | 6.9  | 1.0  | 7.9 | 2.0  | 0.4 | 1.8 | 0.878714214 | 2154.2 | 32.2 | 2214.3 | 18.0 | 2270.5 | 16.5  | 5.1   |
| Spot 33 | 168 | 62400.0   | 2.4 | 11.2 | 0.9  | 3.1 | 1.6  | 0.3 | 1.3 | 0.831799109 | 1445.7 | 17.4 | 1425.1 | 12.4 | 1394.4 | 17.2  | -3.7  |
| Spot 35 | 410 | 209327.8  | 2.1 | 12.3 | 0.8  | 2.3 | 1.6  | 0.2 | 1.4 | 0.855530714 | 1207.4 | 15.4 | 1213.2 | 11.6 | 1223.4 | 16.7  | 1.3   |
| Spot 36 | 62  | 22121.5   | 2.8 | 13.2 | 3.8  | 1.9 | 6.5  | 0.2 | 5.3 | 0.812157077 | 1106.5 | 53.4 | 1093.0 | 43.3 | 1066.1 | 75.9  | -3.8  |
| Spot 37 | 63  | 1682.2    | 2.3 | 19.4 | 4.4  | 0.2 | 6.7  | 0.0 | 3.3 | 0.499600118 | 171.0  | 5.6  | 149.0  | 9.3  | NA     | NA    |       |
| Spot 38 | 196 | 18586.2   | 3.9 | 12.5 | 1.0  | 2.2 | 2.0  | 0.2 | 1.7 | 0.861286795 | 1187.7 | 18.4 | 1179.8 | 13.7 | 1165.4 | 19.8  | -1.9  |
| Spot 39 | 42  | 1989.7    | 1.6 | 13.7 | 6.3  | 0.5 | 8.4  | 0.1 | 2.9 | 0.341349651 | 319.2  | 8.9  | 382.8  | 26.6 | 788.1  | 165.0 | 59.5  |
| Spot 40 | 122 | 7027.1    | 2.7 | 21.6 | 3.7  | 0.1 | 6.1  | 0.0 | 4.8 | 0.784704587 | 93.7   | 4.4  | 86.4   | 5.0  | NA     | NA    |       |
| Spot 41 | 276 | 182844.6  | 1.2 | 9.2  | 0.8  | 4.7 | 1.5  | 0.3 | 1.4 | 0.873808771 | 1774.2 | 20.9 | 1775.2 | 13.0 | 1776.4 | 13.7  | 0.1   |
| Spot 42 | 450 | 39974.6   | 7.6 | 11.8 | 0.9  | 2.0 | 1.5  | 0.2 | 1.2 | 0.81029068  | 1039.7 | 11.7 | 1122.1 | 10.2 | 1285.2 | 17.1  | 19.1  |
| Spot 44 | 643 | 62574.3   | 1.2 | 13.6 | 0.7  | 1.7 | 1.6  | 0.2 | 1.5 | 0.900122824 | 984.5  | 13.4 | 991.0  | 10.3 | 1005.4 | 14.4  | 2.1   |
| Spot 45 | 523 | 1547453.3 | 9.7 | 16.6 | 2.6  | 0.5 | 6.3  | 0.1 | 5.8 | 0.912696279 | 354.0  | 19.9 | 389.0  | 20.4 | 602.2  | 55.9  | 41.2  |
| Spot 48 | 84  | 90610.2   | 3.3 | 11.8 | 0.9  | 2.5 | 1.8  | 0.2 | 1.6 | 0.878214162 | 1277.1 | 18.7 | 1284.8 | 13.4 | 1297.6 | 17.1  | 1.6   |
| Spot 50 | 98  | 34862.2   | 1.8 | 9.1  | 1.2  | 4.6 | 1.9  | 0.3 | 1.6 | 0.796648315 | 1732.2 | 23.5 | 1752.8 | 16.2 | 1777.5 | 21.5  | 2.5   |
| Spot 51 | 74  | 136719.4  | 3.9 | 14.1 | 1.4  | 1.5 | 2.8  | 0.1 | 2.5 | 0.87573057  | 900.3  | 20.9 | 912.6  | 17.1 | 942.5  | 28.1  | 4.5   |
| Spot 52 | 109 | 33727.8   | 1.7 | 14.1 | 1.1  | 1.5 | 1.7  | 0.2 | 1.3 | 0.761387702 | 914.3  | 11.3 | 917.8  | 10.5 | 926.3  | 23.2  | 1.3   |
| Spot 53 | 94  | 2361.0    | 2.1 | 17.8 | 1.8  | 0.3 | 4.6  | 0.0 | 2.0 | 0.439659716 | 279.9  | 5.5  | 270.1  | 10.9 | 185.6  | 96.2  | -50.8 |
| Spot 54 | 24  | 77877.6   | 1.2 | 12.5 | 2.2  | 2.0 | 3.5  | 0.2 | 2.7 | 0.766215579 | 1079.3 | 26.5 | 1115.2 | 23.6 | 1185.8 | 44.3  | 9.0   |
| Spot 55 | 204 | 96478.8   | 5.1 | 12.9 | 0.8  | 2.0 | 1.5  | 0.2 | 1.3 | 0.851491663 | 1105.5 | 13.3 | 1109.2 | 10.4 | 1116.5 | 16.1  | 1.0   |
| Spot 56 | 106 | 30564.6   | 2.5 | 12.7 | 1.3  | 2.2 | 2.1  | 0.2 | 1.6 | 0.770227678 | 1182.2 | 17.2 | 1166.4 | 14.3 | 1137.3 | 26.2  | -3.9  |
| Spot 57 | 250 | 167405.7  | 3.1 | 11.6 | 0.9  | 2.8 | 1.8  | 0.2 | 1.6 | 0.877083721 | 1370.6 | 19.6 | 1354.8 | 13.5 | 1329.9 | 16.8  | -3.1  |
| Spot 58 | 421 | 9243.1    | 1.4 | 18.5 | 1.9  | 0.3 | 2.3  | 0.0 | 1.2 | 0.521585558 | 275.4  | 3.2  | 277.8  | 5.6  | 297.7  | 45.0  | 7.5   |



|          |     |           |       |      |     |     |     |     |     |             |        |      |        |      |        |       |       |
|----------|-----|-----------|-------|------|-----|-----|-----|-----|-----|-------------|--------|------|--------|------|--------|-------|-------|
| Spot 60  | 317 | 13806.9   | 10.9  | 19.6 | 2.5 | 0.3 | 3.5 | 0.0 | 2.4 | 0.683277775 | 245.2  | 5.8  | 239.3  | 7.5  | 181.7  | 60.0  | -34.9 |
| Spot 61  | 149 | 12589.6   | 2.4   | 19.6 | 1.5 | 0.3 | 2.3 | 0.0 | 1.5 | 0.672104258 | 243.2  | 3.7  | 237.0  | 4.8  | 176.0  | 39.5  | -38.2 |
| Spot 62  | 242 | 7277.9    | 2.3   | 19.8 | 1.3 | 0.3 | 1.9 | 0.0 | 1.3 | 0.701470537 | 279.2  | 3.6  | 261.9  | 4.3  | 110.0  | 31.5  | ####  |
| Spot 63  | 317 | 346833.6  | 27.3  | 19.2 | 1.5 | 0.3 | 2.3 | 0.0 | 1.7 | 0.748565748 | 259.2  | 4.4  | 260.6  | 5.3  | 273.6  | 35.0  | 5.3   |
| Spot 65  | 88  | 7508.8    | 1.2   | 15.0 | 4.7 | 0.3 | 6.1 | 0.0 | 3.8 | 0.634279593 | 193.4  | 7.3  | 243.4  | 13.1 | 757.7  | 99.0  | 74.5  |
| Spot 66  | 304 | 29387.5   | 9.1   | 19.7 | 1.6 | 0.3 | 2.2 | 0.0 | 1.5 | 0.680278162 | 250.6  | 3.7  | 245.8  | 4.8  | 200.5  | 37.7  | -25.0 |
| Spot 67  | 176 | 536255.0  | 3.7   | 11.4 | 0.9 | 2.9 | 1.4 | 0.2 | 1.1 | 0.764095384 | 1381.0 | 13.7 | 1376.4 | 10.9 | 1369.3 | 17.9  | -0.9  |
| Spot 68  | 378 | 12942.3   | 2.9   | 19.8 | 1.2 | 0.2 | 1.9 | 0.0 | 1.5 | 0.782637722 | 201.2  | 3.0  | 197.5  | 3.5  | 154.6  | 28.2  | -30.1 |
| Spot 69  | 190 | 127321.1  | 1.0   | 17.4 | 1.2 | 0.7 | 2.2 | 0.1 | 1.8 | 0.826734354 | 550.5  | 9.5  | 539.4  | 9.1  | 492.7  | 27.1  | -11.7 |
| Spot 71  | 535 | 18930.7   | 1.3   | 11.1 | 0.8 | 1.2 | 1.5 | 0.1 | 1.3 | 0.837206969 | 599.3  | 7.2  | 799.9  | 8.3  | 1408.8 | 15.7  | 57.5  |
| Spot 72  | 264 | 36197.9   | 19.2  | 11.8 | 0.8 | 2.7 | 1.4 | 0.2 | 1.2 | 0.822107028 | 1337.3 | 14.3 | 1320.6 | 10.7 | 1293.6 | 16.0  | -3.4  |
| Spot 73  | 325 | 10755.1   | 17.8  | 15.7 | 1.5 | 0.8 | 2.6 | 0.1 | 2.1 | 0.820175437 | 585.5  | 12.0 | 606.1  | 11.9 | 684.1  | 31.8  | 14.4  |
| Spot 75  | 694 | 42396.5   | 303.7 | 19.2 | 0.7 | 0.3 | 1.3 | 0.0 | 1.1 | 0.82091581  | 252.4  | 2.6  | 253.6  | 2.9  | 264.7  | 17.0  | 4.7   |
| Spot 77  | 213 | 33980.7   | 1.8   | 19.0 | 1.3 | 0.3 | 2.0 | 0.0 | 1.5 | 0.740697065 | 289.2  | 4.2  | 288.9  | 5.0  | 286.1  | 30.6  | -1.1  |
| Spot 78  | 416 | 76449.7   | 2.1   | 18.9 | 1.2 | 0.3 | 1.7 | 0.0 | 1.3 | 0.744351983 | 238.7  | 3.0  | 245.6  | 3.8  | 312.1  | 26.2  | 23.5  |
| Spot 79  | 245 | 20027.9   | 3.5   | 16.8 | 1.6 | 0.7 | 1.9 | 0.1 | 1.1 | 0.569766664 | 520.6  | 5.5  | 527.3  | 7.9  | 556.4  | 34.5  | 6.4   |
| Spot 80  | 269 | 21557.4   | 1.7   | 19.4 | 1.3 | 0.3 | 2.2 | 0.0 | 1.8 | 0.80319128  | 280.2  | 4.8  | 274.7  | 5.3  | 227.9  | 30.2  | -22.9 |
| Spot 82  | 39  | 2954.0    | 4.3   | 15.5 | 2.4 | 0.8 | 2.9 | 0.1 | 1.5 | 0.537171077 | 614.7  | 9.0  | 607.3  | 13.1 | 579.8  | 52.5  | -6.0  |
| Spot 83  | 153 | 32208.3   | 1.5   | 11.9 | 1.5 | 2.1 | 4.5 | 0.2 | 4.3 | 0.945501326 | 1098.0 | 43.3 | 1161.5 | 31.4 | 1282.1 | 28.7  | 14.4  |
| Spot 85  | 319 | 22946.9   | 1.6   | 19.6 | 1.0 | 0.3 | 1.6 | 0.0 | 1.2 | 0.769213179 | 313.5  | 3.8  | 301.8  | 4.2  | 212.5  | 23.9  | -47.5 |
| Spot 86  | 669 | 26673.3   | 0.9   | 19.3 | 1.0 | 0.3 | 1.4 | 0.0 | 1.0 | 0.713557575 | 271.4  | 2.7  | 268.5  | 3.4  | 243.3  | 23.0  | -11.5 |
| Spot 87  | 243 | 3864.3    | 3.7   | 19.2 | 1.4 | 0.3 | 2.0 | 0.0 | 1.4 | 0.685177434 | 239.9  | 3.2  | 228.0  | 4.1  | 106.7  | 34.3  | ####  |
| Spot 88  | 148 | 24274.1   | 6.3   | 11.7 | 1.1 | 2.5 | 2.0 | 0.2 | 1.7 | 0.835388409 | 1270.6 | 19.5 | 1285.9 | 14.8 | 1311.5 | 21.6  | 3.1   |
| Spot 90  | 135 | 12537.8   | 2.3   | 19.6 | 2.5 | 0.3 | 3.3 | 0.0 | 1.9 | 0.58980242  | 294.4  | 5.6  | 282.0  | 8.1  | 180.1  | 62.2  | -63.5 |
| Spot 91  | 114 | 44398.1   | 2.4   | 13.9 | 1.4 | 1.6 | 1.9 | 0.2 | 1.3 | 0.678647277 | 954.7  | 11.6 | 960.1  | 12.0 | 972.5  | 28.8  | 1.8   |
| Spot 92  | 87  | 5381.2    | 1.9   | 19.2 | 2.2 | 0.3 | 3.3 | 0.0 | 2.4 | 0.735963654 | 288.7  | 6.9  | 274.9  | 8.0  | 159.2  | 52.4  | -81.3 |
| Spot 93  | 148 | 3622.2    | 1.6   | 18.9 | 2.4 | 0.3 | 5.1 | 0.0 | 1.5 | 0.305520558 | 291.3  | 4.4  | 274.5  | 12.1 | 132.9  | 113.1 | ####  |
| Spot 94  | 182 | 13556.4   | 3.2   | 13.0 | 4.1 | 0.8 | 6.4 | 0.1 | 5.0 | 0.771780453 | 449.8  | 21.5 | 570.7  | 28.0 | 1087.1 | 81.9  | 58.6  |
| Spot 96  | 385 | 30568.8   | 6.7   | 11.4 | 0.8 | 2.7 | 1.4 | 0.2 | 1.1 | 0.803446103 | 1301.1 | 13.3 | 1324.0 | 10.4 | 1361.1 | 16.2  | 4.4   |
| Spot 97  | 315 | 187333.9  | 5.1   | 12.5 | 0.7 | 2.2 | 1.7 | 0.2 | 1.6 | 0.910027575 | 1159.0 | 16.6 | 1169.6 | 12.0 | 1189.5 | 14.1  | 2.6   |
| Spot 98  | 605 | 2728298.7 | 1.0   | 17.7 | 2.2 | 0.3 | 2.6 | 0.0 | 1.3 | 0.514223107 | 281.6  | 3.7  | 302.5  | 6.9  | 467.0  | 49.8  | 39.7  |
| Spot 99  | 149 | 5978.1    | 1.3   | 19.4 | 1.8 | 0.3 | 3.4 | 0.0 | 1.4 | 0.420006706 | 280.1  | 3.9  | 267.3  | 8.0  | 156.4  | 72.3  | -79.1 |
| Spot 100 | 67  | 14805.8   | 2.6   | 17.0 | 1.3 | 0.7 | 1.7 | 0.1 | 0.9 | 0.551847325 | 560.5  | 4.9  | 552.2  | 7.1  | 518.1  | 30.5  | -8.2  |
| Spot 101 | 354 | 588815.4  | 7.0   | 13.0 | 1.3 | 2.0 | 2.0 | 0.2 | 1.6 | 0.777764671 | 1100.1 | 15.8 | 1104.7 | 13.5 | 1113.7 | 25.2  | 1.2   |
| Spot 102 | 127 | 14309.2   | 3.5   | 12.5 | 1.5 | 2.1 | 2.1 | 0.2 | 1.5 | 0.692440096 | 1121.2 | 15.3 | 1136.6 | 14.7 | 1166.0 | 30.6  | 3.8   |
| Spot 103 | 64  | 7946.0    | 2.7   | 14.4 | 1.7 | 1.4 | 3.0 | 0.1 | 2.3 | 0.75707754  | 887.3  | 19.1 | 878.3  | 17.9 | 855.6  | 41.3  | -3.7  |
| Spot 104 | 350 | 146836.3  | 2.2   | 8.3  | 0.8 | 5.6 | 1.6 | 0.3 | 1.4 | 0.876421921 | 1880.1 | 22.6 | 1913.9 | 13.6 | 1950.6 | 13.6  | 3.6   |
| Spot 106 | 37  | 3994.8    | 1.3   | 16.0 | 2.6 | 0.7 | 3.2 | 0.1 | 1.9 | 0.594423813 | 534.6  | 9.9  | 540.2  | 13.5 | 564.0  | 56.6  | 5.2   |
| Spot 107 | 501 | 25843.3   | 1.7   | 19.3 | 1.0 | 0.3 | 1.3 | 0.0 | 0.9 | 0.697297869 | 238.1  | 2.2  | 239.0  | 2.9  | 248.0  | 22.2  | 4.0   |
| Spot 108 | 173 | 2282.6    | 1.2   | 20.8 | 2.5 | 0.1 | 4.1 | 0.0 | 3.1 | 0.768964578 | 166.4  | 5.2  | 141.8  | 5.4  | NA     | NA    |       |
| Spot 109 | 621 | 97761.8   | 0.9   | 13.5 | 0.9 | 1.8 | 1.6 | 0.2 | 1.3 | 0.821683544 | 1032.0 | 12.3 | 1033.4 | 10.1 | 1036.3 | 18.0  | 0.4   |
| Spot 110 | 567 | 59597.1   | 17.5  | 19.6 | 1.1 | 0.3 | 1.9 | 0.0 | 1.5 | 0.812084278 | 243.0  | 3.7  | 241.4  | 4.1  | 225.9  | 25.5  | -7.6  |
| Spot 111 | 60  | 850.1     | 1.1   | 18.1 | 3.6 | 0.1 | 5.8 | 0.0 | 2.8 | 0.475736019 | 177.6  | 4.8  | 137.5  | 7.4  | NA     | NA    |       |

|          |     |          |      |      |     |     |      |     |     |             |        |      |        |      |        |       |       |
|----------|-----|----------|------|------|-----|-----|------|-----|-----|-------------|--------|------|--------|------|--------|-------|-------|
| Spot 112 | 172 | 10213.5  | 3.5  | 19.4 | 1.8 | 0.3 | 2.2  | 0.0 | 1.2 | 0.56527113  | 258.0  | 3.1  | 252.5  | 4.8  | 202.1  | 41.2  | -27.6 |
| Spot 114 | 491 | 160837.2 | 31.4 | 13.4 | 0.9 | 1.7 | 1.5  | 0.2 | 1.2 | 0.813710041 | 986.4  | 11.2 | 1010.5 | 9.6  | 1063.0 | 17.6  | 7.2   |
| Spot 115 | 71  | 3952.6   | 2.4  | 19.7 | 3.1 | 0.2 | 4.6  | 0.0 | 3.2 | 0.691940018 | 207.1  | 6.5  | 195.0  | 8.2  | 51.0   | NA    | ####  |
| Spot 117 | 42  | 7276.5   | 2.1  | 12.8 | 1.8 | 2.1 | 2.7  | 0.2 | 1.8 | 0.665742739 | 1152.8 | 19.2 | 1135.3 | 18.7 | 1102.0 | 40.9  | -4.6  |
| Spot 118 | 99  | 14436.6  | 2.4  | 14.0 | 1.1 | 1.6 | 1.9  | 0.2 | 1.5 | 0.803866917 | 960.2  | 13.6 | 953.0  | 11.7 | 936.4  | 23.2  | -2.5  |
| Spot 119 | 48  | 2846.3   | 1.1  | 12.7 | 7.7 | 0.3 | 7.9  | 0.0 | 1.9 | 0.236481982 | 186.4  | 3.4  | 264.7  | 18.5 | 1031.4 | 156.0 | 81.9  |
| Spot 120 | 193 | 36122.0  | 1.1  | 18.8 | 1.7 | 0.3 | 2.2  | 0.0 | 1.4 | 0.612986705 | 299.5  | 4.0  | 301.5  | 5.8  | 316.9  | 39.6  | 5.5   |
| Spot 121 | 90  | 11239.9  | 2.7  | 12.7 | 1.2 | 2.1 | 1.6  | 0.2 | 1.1 | 0.686671441 | 1181.4 | 12.0 | 1164.6 | 11.2 | 1133.6 | 23.4  | -4.2  |
| Spot 122 | 177 | 27141.1  | 2.4  | 8.8  | 0.9 | 4.9 | 1.7  | 0.3 | 1.5 | 0.846255282 | 1762.0 | 22.8 | 1808.8 | 14.7 | 1863.1 | 16.8  | 5.4   |
| Spot 123 | 32  | 14717.4  | 6.9  | 13.8 | 2.9 | 1.4 | 4.2  | 0.1 | 3.1 | 0.73031482  | 873.2  | 25.1 | 904.0  | 25.2 | 980.1  | 58.6  | 10.9  |
| Spot 124 | 227 | 32405.2  | 1.7  | 19.1 | 1.5 | 0.3 | 2.0  | 0.0 | 1.4 | 0.691045976 | 301.3  | 4.1  | 298.8  | 5.2  | 278.6  | 33.4  | -8.1  |
| Spot 125 | 108 | 4123.2   | 1.2  | 18.5 | 1.5 | 0.6 | 2.0  | 0.1 | 1.4 | 0.669581301 | 514.0  | 6.7  | 464.2  | 7.5  | 224.6  | 34.6  | ####  |
| Spot 126 | 54  | 5569.0   | 3.6  | 13.5 | 1.8 | 1.6 | 2.6  | 0.2 | 1.5 | 0.584931112 | 970.3  | 13.5 | 970.5  | 16.1 | 970.9  | 42.5  | 0.1   |
| Spot 127 | 473 | 45600.5  | 1.6  | 13.7 | 0.9 | 1.7 | 1.5  | 0.2 | 1.1 | 0.765260059 | 1007.3 | 10.4 | 1008.2 | 9.3  | 1009.9 | 19.1  | 0.3   |
| Spot 128 | 35  | 4383.8   | 1.1  | 17.2 | 4.1 | 0.3 | 4.9  | 0.0 | 2.5 | 0.499789294 | 264.7  | 6.4  | 279.4  | 12.0 | 404.6  | 95.5  | 34.6  |
| Spot 129 | 616 | 7889.6   | 2.2  | 19.5 | 0.8 | 0.3 | 1.4  | 0.0 | 1.1 | 0.808775346 | 277.8  | 3.0  | 267.1  | 3.2  | 173.8  | 18.8  | -59.9 |
| Spot 131 | 74  | 1249.0   | 5.3  | 20.3 | 5.0 | 0.1 | 8.6  | 0.0 | 6.0 | 0.694645573 | 108.4  | 6.4  | 85.2   | 7.1  | NA     | NA    |       |
| Spot 132 | 221 | 2510.5   | 0.9  | 20.2 | 1.4 | 0.2 | 2.2  | 0.0 | 1.7 | 0.756239047 | 198.4  | 3.2  | 175.2  | 3.5  | NA     | NA    |       |
| Spot 133 | 128 | 29263.4  | 3.3  | 12.6 | 0.7 | 2.2 | 1.7  | 0.2 | 1.5 | 0.903156857 | 1210.6 | 16.7 | 1194.2 | 11.8 | 1164.6 | 14.3  | -4.0  |
| Spot 134 | 126 | 11417.1  | 1.8  | 17.8 | 1.8 | 0.6 | 2.2  | 0.1 | 1.3 | 0.567927055 | 484.3  | 5.8  | 470.7  | 8.3  | 405.2  | 40.6  | -19.5 |
| Spot 135 | 390 | 8443.1   | 7.9  | 19.0 | 2.1 | 0.3 | 3.4  | 0.0 | 2.3 | 0.666729631 | 248.3  | 5.5  | 246.9  | 7.4  | 233.8  | 58.1  | -6.2  |
| Spot 136 | 148 | 6495.4   | 1.3  | 18.7 | 2.0 | 0.3 | 2.4  | 0.0 | 1.2 | 0.503073042 | 290.0  | 3.4  | 286.4  | 6.0  | 256.8  | 47.8  | -12.9 |
| Spot 137 | 200 | 3104.5   | 11.9 | 19.5 | 2.0 | 0.3 | 3.1  | 0.0 | 2.2 | 0.715366523 | 255.7  | 5.6  | 234.3  | 6.6  | 24.7   | NA    | ####  |
| Spot 138 | 73  | 3960.1   | 1.3  | 16.6 | 1.5 | 0.8 | 2.4  | 0.1 | 1.7 | 0.6947281   | 666.2  | 10.4 | 624.2  | 11.1 | 474.8  | 37.8  | -40.3 |
| Spot 139 | 274 | 65566.5  | 2.2  | 11.4 | 0.6 | 2.9 | 1.9  | 0.2 | 1.8 | 0.940084677 | 1380.6 | 22.0 | 1378.1 | 14.2 | 1374.3 | 12.3  | -0.5  |
| Spot 140 | 38  | 1405.7   | 3.3  | 19.0 | 4.0 | 0.3 | 6.2  | 0.0 | 3.5 | 0.563570616 | 282.1  | 9.6  | 234.8  | 12.9 | NA     | NA    |       |
| Spot 141 | 123 | 7298.0   | 1.8  | 18.7 | 2.3 | 0.3 | 3.2  | 0.0 | 1.4 | 0.436522838 | 298.6  | 4.0  | 295.2  | 8.1  | 267.8  | 65.3  | -11.5 |
| Spot 142 | 146 | 15236.8  | 1.4  | 16.5 | 1.1 | 0.8 | 1.7  | 0.1 | 1.2 | 0.737029274 | 596.1  | 7.0  | 595.3  | 7.5  | 592.5  | 24.3  | -0.6  |
| Spot 143 | 101 | 19073.2  | 3.3  | 7.8  | 0.6 | 6.6 | 1.4  | 0.4 | 1.2 | 0.891008041 | 2031.2 | 21.4 | 2052.9 | 12.1 | 2074.7 | 11.0  | 2.1   |
| Spot 144 | 141 | 2638.2   | 2.5  | 15.8 | 3.9 | 0.3 | 4.3  | 0.0 | 1.7 | 0.388378383 | 274.6  | 4.5  | 303.3  | 11.3 | 530.4  | 86.9  | 48.2  |
| Spot 146 | 482 | 345773.8 | 3.8  | 14.4 | 0.9 | 1.2 | 1.6  | 0.1 | 1.4 | 0.847479837 | 791.7  | 10.4 | 822.5  | 9.3  | 906.8  | 18.0  | 12.7  |
| Spot 147 | 146 | 15465.5  | 11.3 | 17.6 | 2.4 | 0.3 | 2.9  | 0.0 | 1.6 | 0.542666182 | 254.1  | 3.9  | 274.5  | 6.9  | 452.7  | 53.4  | 43.9  |
| Spot 148 | 65  | 1979.0   | 1.4  | 24.3 | 2.4 | 0.1 | 3.2  | 0.0 | 1.4 | 0.441329381 | 184.3  | 2.5  | 127.9  | 3.8  | NA     | NA    |       |
| Spot 150 | 159 | 10667.8  | 1.8  | 18.0 | 2.7 | 0.4 | 3.1  | 0.0 | 1.4 | 0.454884276 | 298.2  | 4.1  | 307.9  | 8.1  | 381.9  | 61.4  | 21.9  |
| Spot 151 | 21  | 863.6    | 1.8  | 13.6 | 9.1 | 0.2 | 13.1 | 0.0 | 4.4 | 0.340416386 | 190.6  | 8.4  | 214.9  | 25.3 | 491.4  | 271.8 | 61.2  |
| Spot 152 | 782 | 14890.3  | 1.4  | 19.4 | 1.0 | 0.3 | 1.5  | 0.0 | 1.1 | 0.752923834 | 243.3  | 2.7  | 241.1  | 3.2  | 219.8  | 22.8  | -10.7 |
| Spot 153 | 100 | 112703.4 | 1.8  | 6.3  | 0.7 | 9.3 | 1.3  | 0.4 | 1.1 | 0.84118163  | 2283.3 | 20.9 | 2370.7 | 11.8 | 2446.7 | 11.8  | 6.7   |
| Spot 155 | 686 | 31123.4  | 12.0 | 17.9 | 1.1 | 0.5 | 2.0  | 0.1 | 1.6 | 0.824412359 | 373.3  | 6.0  | 382.4  | 6.4  | 438.1  | 25.2  | 14.8  |
| Spot 156 | 137 | 37037.0  | 1.5  | 10.0 | 1.2 | 3.1 | 2.6  | 0.2 | 2.3 | 0.883922535 | 1324.4 | 27.3 | 1442.1 | 19.9 | 1620.3 | 22.5  | 18.3  |
| Spot 157 | 56  | 1408.3   | 0.7  | 20.3 | 3.3 | 0.2 | 5.5  | 0.0 | 2.8 | 0.510899062 | 189.0  | 5.2  | 149.4  | 7.6  | NA     | NA    |       |
| Spot 158 | 501 | 126694.0 | 9.3  | 15.2 | 0.9 | 1.0 | 2.1  | 0.1 | 1.8 | 0.890415797 | 696.9  | 12.2 | 721.1  | 10.7 | 797.2  | 19.7  | 12.6  |
| Spot 159 | 73  | 10764.9  | 2.7  | 15.5 | 1.3 | 1.0 | 2.0  | 0.1 | 1.3 | 0.66596712  | 709.2  | 9.0  | 710.1  | 10.3 | 712.8  | 31.9  | 0.5   |
| Spot 160 | 149 | 27230.5  | 4.1  | 12.3 | 1.0 | 2.3 | 1.5  | 0.2 | 1.1 | 0.724458405 | 1208.8 | 11.9 | 1213.7 | 10.5 | 1222.5 | 20.2  | 1.1   |

|          |      |          |       |      |     |      |     |     |     |             |        |      |        |      |        |       |       |
|----------|------|----------|-------|------|-----|------|-----|-----|-----|-------------|--------|------|--------|------|--------|-------|-------|
| Spot 161 | 458  | 68154.3  | 2.4   | 13.5 | 1.0 | 1.7  | 1.6 | 0.2 | 1.2 | 0.757934486 | 980.7  | 10.8 | 1001.0 | 10.0 | 1045.9 | 20.6  | 6.2   |
| Spot 162 | 174  | 13195.4  | 1.7   | 19.5 | 1.4 | 0.3  | 2.2 | 0.0 | 1.5 | 0.689936549 | 301.8  | 4.4  | 291.4  | 5.5  | 208.4  | 36.3  | -44.8 |
| Spot 163 | 143  | 70564.0  | 1.3   | 19.2 | 2.4 | 0.3  | 3.0 | 0.0 | 1.9 | 0.627110967 | 298.0  | 5.5  | 295.7  | 7.8  | 278.1  | 54.0  | -7.2  |
| Spot 165 | 293  | 3388.2   | 3.2   | 9.7  | 3.2 | 3.7  | 4.2 | 0.3 | 1.7 | 0.417913745 | 1553.3 | 24.1 | 1578.5 | 33.5 | 1612.2 | 70.8  | 3.7   |
| Spot 166 | 76   | 6593.1   | 1.4   | 15.8 | 1.6 | 0.9  | 2.3 | 0.1 | 1.6 | 0.694967558 | 688.1  | 10.5 | 677.2  | 11.4 | 641.0  | 35.7  | -7.4  |
| Spot 168 | 74   | 9175.9   | 1.9   | 14.1 | 1.8 | 1.4  | 2.4 | 0.1 | 1.5 | 0.620943448 | 876.9  | 12.2 | 884.8  | 14.2 | 904.5  | 38.8  | 3.0   |
| Spot 170 | 471  | 114488.3 | 1.9   | 19.5 | 1.1 | 0.3  | 1.9 | 0.0 | 1.5 | 0.797069413 | 268.1  | 4.0  | 266.2  | 4.5  | 250.3  | 26.5  | -7.1  |
| Spot 172 | 115  | 4936.9   | 1.5   | 18.8 | 2.6 | 0.3  | 4.4 | 0.0 | 3.5 | 0.790320574 | 290.3  | 9.9  | 280.5  | 10.8 | 199.7  | 62.8  | -45.4 |
| Spot 173 | 323  | 471678.9 | 7.2   | 8.4  | 1.5 | 5.6  | 2.5 | 0.3 | 2.0 | 0.814488783 | 1901.3 | 33.8 | 1921.7 | 21.7 | 1943.7 | 26.1  | 2.2   |
| Spot 174 | 1761 | 11566.7  | 17.9  | 13.9 | 0.8 | 0.8  | 1.8 | 0.1 | 1.6 | 0.89136315  | 481.8  | 7.6  | 572.2  | 8.0  | 949.6  | 17.0  | 49.3  |
| Spot 176 | 444  | 831375.8 | 1.8   | 12.1 | 0.9 | 2.5  | 1.4 | 0.2 | 1.0 | 0.77053532  | 1295.5 | 12.2 | 1282.0 | 9.9  | 1259.4 | 16.9  | -2.9  |
| Spot 177 | 121  | 8396.1   | 4.4   | 13.8 | 1.4 | 1.6  | 2.1 | 0.2 | 1.5 | 0.724895701 | 984.9  | 13.9 | 973.3  | 13.1 | 947.4  | 29.6  | -4.0  |
| Spot 178 | 177  | 18559.4  | 18.6  | 16.2 | 2.0 | 0.5  | 2.6 | 0.1 | 1.7 | 0.644990648 | 358.8  | 6.0  | 398.8  | 8.7  | 637.3  | 43.5  | 43.7  |
| Spot 179 | 470  | 14179.2  | 3.1   | 19.9 | 1.3 | 0.2  | 2.6 | 0.0 | 2.1 | 0.835266748 | 197.9  | 4.2  | 194.6  | 4.5  | 155.3  | 32.9  | -27.5 |
| Spot 180 | 142  | 58862.5  | 282.0 | 15.2 | 1.8 | 1.0  | 2.2 | 0.1 | 1.3 | 0.588812261 | 699.4  | 8.5  | 719.7  | 11.3 | 783.8  | 37.1  | 10.8  |
| Spot 181 | 104  | 11560.1  | 1.8   | 12.6 | 1.4 | 1.8  | 2.4 | 0.2 | 1.9 | 0.787540506 | 988.9  | 17.3 | 1038.1 | 15.6 | 1143.1 | 29.4  | 13.5  |
| Spot 184 | 61   | 3993.4   | 1.1   | 16.3 | 3.3 | 0.7  | 4.2 | 0.1 | 2.5 | 0.598176502 | 510.4  | 12.2 | 510.7  | 16.7 | 511.8  | 73.1  | 0.3   |
| Spot 185 | 274  | 3993.9   | 1.8   | 18.8 | 1.0 | 0.3  | 1.8 | 0.0 | 1.5 | 0.83393081  | 281.9  | 4.2  | 270.4  | 4.4  | 171.5  | 23.7  | -64.4 |
| Spot 186 | 222  | 55297.6  | 3.1   | 12.3 | 1.0 | 2.3  | 1.7 | 0.2 | 1.4 | 0.808053583 | 1213.3 | 14.9 | 1214.2 | 11.8 | 1215.8 | 19.4  | 0.2   |
| Spot 187 | 197  | 126233.9 | 1.8   | 8.7  | 0.8 | 5.2  | 1.7 | 0.3 | 1.5 | 0.878171567 | 1839.7 | 23.4 | 1857.8 | 14.2 | 1878.0 | 14.4  | 2.0   |
| Spot 188 | 92   | 10933.6  | 3.3   | 9.8  | 1.1 | 3.5  | 3.4 | 0.3 | 3.2 | 0.947646801 | 1453.5 | 41.7 | 1524.6 | 26.7 | 1624.8 | 20.1  | 10.5  |
| Spot 189 | 49   | 3474.9   | 2.2   | 12.8 | 1.5 | 1.7  | 3.2 | 0.2 | 1.6 | 0.49674996  | 977.4  | 14.6 | 993.0  | 20.6 | 1027.6 | 57.0  | 4.9   |
| Spot 191 | 481  | 11422.9  | 5.2   | 19.4 | 1.4 | 0.3  | 1.8 | 0.0 | 1.2 | 0.633626523 | 235.1  | 2.7  | 231.8  | 3.8  | 198.0  | 32.7  | -18.7 |
| Spot 193 | 16   | 2125.1   | 1.4   | 11.4 | 4.0 | 2.1  | 5.7 | 0.2 | 2.0 | 0.348608897 | 1113.6 | 20.2 | 1147.1 | 39.0 | 1210.9 | 104.8 | 8.0   |
| Spot 194 | 297  | 13822.8  | 1.7   | 19.2 | 0.9 | 0.3  | 1.7 | 0.0 | 1.4 | 0.834132287 | 287.6  | 3.9  | 282.2  | 4.1  | 238.2  | 21.3  | -20.7 |
| Spot 195 | 585  | 31269.5  | 3.1   | 18.5 | 1.2 | 0.3  | 1.7 | 0.0 | 1.2 | 0.718715968 | 249.0  | 3.0  | 258.2  | 3.9  | 342.7  | 27.3  | 27.4  |
| Spot 196 | 414  | 13518.2  | 1.3   | 19.5 | 0.9 | 0.3  | 2.0 | 0.0 | 1.8 | 0.879724546 | 268.8  | 4.7  | 261.7  | 4.7  | 199.0  | 22.3  | -35.1 |
| Spot 197 | 183  | 14452.1  | 1.5   | 17.1 | 0.9 | 0.7  | 1.7 | 0.1 | 1.4 | 0.812243815 | 543.0  | 7.2  | 536.4  | 7.1  | 508.4  | 21.9  | -6.8  |
| Spot 198 | 725  | 33175.2  | 1.0   | 18.7 | 1.8 | 0.3  | 2.4 | 0.0 | 1.5 | 0.644282353 | 262.1  | 3.9  | 268.5  | 5.6  | 324.6  | 41.2  | 19.3  |
| Spot 199 | 296  | 3393.2   | 1.7   | 18.9 | 1.4 | 0.3  | 2.2 | 0.0 | 1.7 | 0.757229889 | 287.1  | 4.7  | 269.8  | 5.2  | 122.6  | 34.1  | ####  |
| Spot 200 | 291  | 5476.0   | 3.6   | 17.9 | 3.0 | 0.1  | 3.9 | 0.0 | 2.2 | 0.562062345 | 72.8   | 1.6  | 81.0   | 3.0  | 329.9  | 73.4  | 77.9  |
| Spot 202 | 857  | 4710.7   | 3.5   | 19.9 | 1.9 | 0.1  | 3.1 | 0.0 | 1.3 | 0.438893774 | 67.9   | 0.9  | 67.1   | 2.0  | 40.5   | NA    | -67.6 |
| Spot 203 | 77   | 1386.2   | 1.3   | 16.1 | 4.6 | 0.3  | 5.3 | 0.0 | 2.0 | 0.38091094  | 281.0  | 5.6  | 278.9  | 13.0 | 261.3  | 113.2 | -7.5  |
| Spot 204 | 227  | 32858.0  | 1.5   | 5.5  | 0.6 | 11.0 | 1.6 | 0.4 | 1.5 | 0.920469301 | 2373.1 | 29.0 | 2527.2 | 14.8 | 2653.4 | 10.3  | 10.6  |
| Spot 205 | 714  | 32485.8  | 1.0   | 19.2 | 0.9 | 0.3  | 1.8 | 0.0 | 1.5 | 0.85143489  | 288.1  | 4.3  | 285.8  | 4.4  | 267.6  | 21.5  | -7.6  |
| Spot 206 | 136  | 584699.7 | 2.1   | 12.6 | 1.2 | 2.2  | 1.9 | 0.2 | 1.5 | 0.795088866 | 1200.0 | 16.8 | 1191.7 | 13.5 | 1176.6 | 23.2  | -2.0  |
| Spot 207 | 259  | 11520.9  | 3.7   | 19.3 | 1.4 | 0.3  | 2.3 | 0.0 | 1.5 | 0.66547394  | 270.4  | 4.1  | 264.4  | 5.4  | 212.3  | 40.0  | -27.3 |
| Spot 208 | 918  | 244317.9 | 18.9  | 12.3 | 1.0 | 2.4  | 2.0 | 0.2 | 1.7 | 0.858682064 | 1276.0 | 20.2 | 1255.5 | 14.6 | 1220.4 | 20.4  | -4.6  |
| Spot 209 | 207  | 39384.1  | 1.3   | 19.3 | 2.1 | 0.3  | 2.6 | 0.0 | 1.5 | 0.574496926 | 284.1  | 4.1  | 281.2  | 6.3  | 256.8  | 48.5  | -10.7 |
| Spot 210 | 1220 | 91664.4  | 32.7  | 14.0 | 1.0 | 1.6  | 1.9 | 0.2 | 1.6 | 0.852791965 | 995.8  | 14.9 | 982.3  | 11.9 | 952.4  | 20.2  | -4.6  |
| Spot 212 | 596  | 9110.0   | 0.9   | 19.3 | 0.9 | 0.3  | 1.4 | 0.0 | 1.1 | 0.787922411 | 271.9  | 2.9  | 263.7  | 3.2  | 191.6  | 19.9  | -41.9 |
| Spot 213 | 132  | 17855.8  | 2.1   | 17.0 | 1.2 | 0.7  | 1.8 | 0.1 | 1.4 | 0.753975569 | 556.7  | 7.4  | 550.4  | 7.8  | 524.4  | 26.4  | -6.2  |
| Spot 214 | 265  | 558253.8 | 338.0 | 17.0 | 0.9 | 0.7  | 1.9 | 0.1 | 1.6 | 0.868272027 | 526.6  | 8.2  | 531.9  | 7.8  | 554.4  | 20.3  | 5.0   |

|          |     |            |      |      |     |     |     |     |     |             |        |      |        |      |        |       |       |
|----------|-----|------------|------|------|-----|-----|-----|-----|-----|-------------|--------|------|--------|------|--------|-------|-------|
| Spot 215 | 477 | 20089.9    | 45.0 | 17.1 | 0.9 | 0.7 | 1.6 | 0.1 | 1.3 | 0.817084013 | 554.0  | 7.1  | 547.0  | 6.9  | 518.2  | 20.7  | -6.9  |
| Spot 216 | 569 | 201364.0   | 37.9 | 12.4 | 0.7 | 2.3 | 1.3 | 0.2 | 1.1 | 0.843531217 | 1198.7 | 11.6 | 1201.2 | 8.8  | 1205.8 | 13.3  | 0.6   |
| Spot 218 | 125 | 1763.5     | 1.4  | 18.2 | 4.2 | 0.2 | 6.3 | 0.0 | 1.7 | 0.273229516 | 174.6  | 3.0  | 164.7  | 9.5  | 24.1   | NA    | ####  |
| Spot 219 | 350 | 41746.0    | 1.6  | 19.1 | 1.1 | 0.3 | 1.8 | 0.0 | 1.5 | 0.795709564 | 270.8  | 3.9  | 271.1  | 4.4  | 273.6  | 25.4  | 1.0   |
| Spot 220 | 93  | 15775.5    | 3.5  | 12.4 | 1.2 | 2.2 | 1.8 | 0.2 | 1.3 | 0.738940328 | 1162.9 | 14.1 | 1173.4 | 12.5 | 1192.8 | 23.8  | 2.5   |
| Spot 222 | 526 | 36988.9    | 47.3 | 12.6 | 0.8 | 2.1 | 1.4 | 0.2 | 1.2 | 0.825769697 | 1131.7 | 12.3 | 1145.1 | 9.8  | 1170.5 | 16.0  | 3.3   |
| Spot 224 | 111 | 6213.6     | 3.3  | 16.6 | 2.6 | 0.6 | 3.5 | 0.1 | 1.5 | 0.4128075   | 435.8  | 6.1  | 449.9  | 12.8 | 522.2  | 70.5  | 16.5  |
| Spot 226 | 277 | 6877.8     | 2.2  | 19.5 | 1.1 | 0.3 | 1.9 | 0.0 | 1.5 | 0.796529367 | 277.7  | 4.2  | 264.3  | 4.5  | 147.0  | 27.4  | -88.9 |
| Spot 227 | 578 | 49311.2    | 3.3  | 15.2 | 1.2 | 1.0 | 1.6 | 0.1 | 1.1 | 0.686362717 | 690.2  | 7.4  | 712.1  | 8.4  | 781.8  | 25.0  | 11.7  |
| Spot 228 | 198 | 3497.4     | 1.2  | 20.1 | 3.5 | 0.1 | 4.5 | 0.0 | 2.6 | 0.57574083  | 77.3   | 2.0  | 73.8   | 3.2  | NA     | NA    |       |
| Spot 230 | 124 | 4517.2     | 1.2  | 21.5 | 2.1 | 0.2 | 4.8 | 0.0 | 2.1 | 0.428847905 | 192.2  | 3.9  | 168.8  | 7.4  | NA     | NA    |       |
| Spot 231 | 153 | 14278.3    | 3.7  | 19.0 | 1.9 | 0.4 | 3.2 | 0.1 | 2.5 | 0.779382869 | 326.1  | 7.9  | 319.0  | 8.7  | 268.0  | 45.9  | -21.7 |
| Spot 232 | 254 | 76412.2    | 2.0  | 11.2 | 1.1 | 2.9 | 1.9 | 0.2 | 1.5 | 0.816337488 | 1364.4 | 18.9 | 1380.7 | 14.2 | 1406.0 | 20.8  | 3.0   |
| Spot 233 | 121 | 4376.3     | 1.5  | 18.7 | 2.2 | 0.3 | 3.2 | 0.0 | 1.8 | 0.560379659 | 281.3  | 4.9  | 273.7  | 7.6  | 209.6  | 60.7  | -34.2 |
| Spot 234 | 87  | 41557.0    | 2.5  | 14.2 | 1.1 | 1.4 | 2.2 | 0.1 | 1.9 | 0.861990219 | 855.4  | 15.5 | 879.2  | 13.2 | 939.5  | 23.3  | 9.0   |
| Spot 236 | 457 | 31369.8    | 4.0  | 11.7 | 0.8 | 2.5 | 2.0 | 0.2 | 1.8 | 0.907873513 | 1241.0 | 20.6 | 1270.5 | 14.5 | 1320.8 | 16.3  | 6.0   |
| Spot 237 | 422 | 17613.1    | 2.6  | 19.4 | 0.8 | 0.3 | 1.5 | 0.0 | 1.3 | 0.838394897 | 240.0  | 3.0  | 238.9  | 3.3  | 228.3  | 19.3  | -5.1  |
| Spot 239 | 228 | 20768.3    | 2.5  | 18.8 | 1.9 | 0.3 | 2.5 | 0.0 | 1.7 | 0.656890816 | 289.6  | 4.7  | 291.9  | 6.4  | 310.2  | 43.4  | 6.6   |
| Spot 240 | 207 | 33172.8    | 2.5  | 13.5 | 0.8 | 1.7 | 1.7 | 0.2 | 1.5 | 0.878968136 | 1014.4 | 14.3 | 1019.9 | 11.2 | 1031.9 | 16.7  | 1.7   |
| Spot 241 | 111 | 37229.1    | 1.5  | 12.7 | 0.8 | 2.1 | 2.6 | 0.2 | 2.4 | 0.948279135 | 1135.3 | 25.3 | 1144.5 | 17.6 | 1161.9 | 16.1  | 2.3   |
| Spot 242 | 184 | 13257.8    | 2.3  | 12.5 | 1.1 | 2.1 | 2.4 | 0.2 | 2.1 | 0.877106228 | 1122.1 | 21.5 | 1142.9 | 16.4 | 1182.5 | 22.7  | 5.1   |
| Spot 243 | 137 | 25131.0    | 1.3  | 18.7 | 1.8 | 0.3 | 2.1 | 0.0 | 1.1 | 0.517086558 | 279.0  | 3.0  | 284.8  | 5.3  | 332.8  | 41.0  | 16.2  |
| Spot 244 | 952 | 11938.3    | 12.7 | 16.0 | 1.5 | 0.3 | 1.8 | 0.0 | 1.0 | 0.549758885 | 224.8  | 2.2  | 266.8  | 4.2  | 653.4  | 32.5  | 65.6  |
| Spot 245 | 415 | 10343.8    | 7.0  | 19.7 | 1.6 | 0.2 | 2.3 | 0.0 | 1.2 | 0.530215021 | 174.8  | 2.1  | 174.8  | 3.6  | 174.7  | 44.7  | 0.0   |
| Spot 246 | 113 | 3721.7     | 1.7  | 19.4 | 1.7 | 0.3 | 2.7 | 0.0 | 1.7 | 0.615870402 | 275.3  | 4.5  | 256.4  | 6.1  | 87.1   | 50.3  | ####  |
| Spot 247 | 69  | 121782.7   | 3.2  | 13.9 | 1.6 | 1.5 | 2.2 | 0.1 | 1.5 | 0.681092999 | 888.0  | 12.2 | 917.5  | 13.0 | 989.2  | 32.1  | 10.2  |
| Spot 248 | 159 | 22172.1    | 0.7  | 10.5 | 0.8 | 3.6 | 1.5 | 0.3 | 1.2 | 0.835216217 | 1557.7 | 17.1 | 1542.5 | 11.8 | 1521.7 | 15.4  | -2.4  |
| Spot 249 | 63  | 20004.9    | 2.2  | 12.6 | 1.6 | 2.0 | 2.5 | 0.2 | 1.9 | 0.766820122 | 1100.3 | 19.7 | 1123.3 | 17.2 | 1167.9 | 32.2  | 5.8   |
| Spot 250 | 38  | 3397.9     | 2.0  | 12.8 | 7.3 | 0.3 | 7.7 | 0.0 | 2.4 | 0.310140479 | 179.9  | 4.2  | 258.0  | 17.6 | 1045.3 | 148.2 | 82.8  |
| Spot 251 | 199 | 52545.2    | 3.5  | 11.0 | 0.8 | 2.9 | 1.4 | 0.2 | 1.2 | 0.842675066 | 1347.2 | 14.7 | 1389.6 | 10.9 | 1455.3 | 14.7  | 7.4   |
| Spot 252 | 364 | 105242.7   | 2.3  | 17.6 | 1.3 | 0.6 | 1.9 | 0.1 | 1.4 | 0.727884052 | 477.2  | 6.3  | 480.1  | 7.2  | 493.8  | 28.3  | 3.4   |
| Spot 253 | 183 | 36724.4    | 4.8  | 12.3 | 0.8 | 2.4 | 1.3 | 0.2 | 1.0 | 0.77763019  | 1274.5 | 11.5 | 1256.1 | 9.2  | 1224.8 | 15.8  | -4.1  |
| Spot 254 | 400 | 78583564.0 | 6.6  | 12.7 | 0.9 | 1.8 | 1.7 | 0.2 | 1.4 | 0.824666311 | 997.7  | 12.8 | 1054.5 | 11.0 | 1174.2 | 18.7  | 15.0  |
| Spot 255 | 67  | 10230.3    | 1.9  | 16.0 | 1.7 | 0.8 | 2.4 | 0.1 | 1.6 | 0.663774894 | 605.4  | 9.1  | 613.2  | 10.9 | 642.1  | 38.0  | 5.7   |
| Spot 256 | 521 | 62824.9    | 14.3 | 13.8 | 0.9 | 1.5 | 1.7 | 0.1 | 1.5 | 0.84951883  | 877.8  | 12.0 | 914.0  | 10.4 | 1002.3 | 18.5  | 12.4  |
| Spot 258 | 361 | 7873.5     | 1.6  | 18.6 | 2.7 | 0.2 | 3.1 | 0.0 | 1.5 | 0.488515542 | 164.4  | 2.4  | 172.5  | 4.9  | 286.1  | 61.4  | 42.5  |
| Spot 259 | 196 | 5202.2     | 2.6  | 18.0 | 1.6 | 0.3 | 2.5 | 0.0 | 1.9 | 0.732767957 | 298.5  | 5.4  | 301.4  | 6.6  | 323.4  | 39.3  | 7.7   |
| Spot 260 | 99  | 25740.7    | 1.8  | 11.2 | 0.9 | 2.8 | 1.8 | 0.2 | 1.6 | 0.875633613 | 1311.4 | 18.5 | 1347.0 | 13.3 | 1404.0 | 16.5  | 6.6   |
| Spot 261 | 49  | 5305.1     | 3.9  | 12.9 | 1.2 | 1.9 | 1.9 | 0.2 | 1.4 | 0.744488026 | 1110.4 | 14.3 | 1096.0 | 12.7 | 1067.6 | 25.4  | -4.0  |
| Spot 262 | 49  | 3009.3     | 1.6  | 18.1 | 3.9 | 0.2 | 5.5 | 0.0 | 3.6 | 0.654998429 | 185.9  | 6.5  | 188.3  | 9.4  | 217.9  | 95.4  | 14.7  |
| Spot 263 | 134 | 13363.7    | 1.9  | 16.4 | 2.7 | 0.4 | 3.3 | 0.0 | 1.8 | 0.557509641 | 296.3  | 5.3  | 334.3  | 9.3  | 607.8  | 58.6  | 51.2  |
| Spot 264 | 170 | 32801.8    | 3.0  | 12.2 | 1.0 | 2.2 | 1.7 | 0.2 | 1.3 | 0.796533006 | 1167.6 | 14.3 | 1189.8 | 11.8 | 1230.6 | 19.9  | 5.1   |
| Spot 265 | 340 | 9666.6     | 10.5 | 19.1 | 1.6 | 0.3 | 2.3 | 0.0 | 1.5 | 0.628599063 | 261.8  | 3.8  | 258.5  | 5.3  | 229.2  | 41.9  | -14.2 |

Run 3 NM8A (discordant)

|          |     |          |      |      |      |      |      |     |      |             |        |       |        |      |        |       |       |
|----------|-----|----------|------|------|------|------|------|-----|------|-------------|--------|-------|--------|------|--------|-------|-------|
| Spot 105 | 0   | 1000.0   | 2.0  | 5.2  | 1.0  | 27.0 | 1.2  | 1.0 | 0.6  | 0.514177533 | 4540.9 | 19.6  | 3383.6 | 11.4 | 2755.1 | 16.4  | -64.8 |
| Spot 113 | 203 | 34181.0  | 8.2  | 12.1 | 1.0  | 2.6  | 1.6  | 0.2 | 1.3  | 0.794084573 | 1342.8 | 15.8  | 1313.6 | 12.1 | 1266.3 | 19.5  | -6.0  |
| Spot 116 | 137 | 90411.7  | 1.2  | 12.4 | 1.0  | 2.5  | 1.6  | 0.2 | 1.3  | 0.789521254 | 1282.9 | 14.8  | 1258.6 | 11.6 | 1217.1 | 19.4  | -5.4  |
| Spot 13  | 55  | 3483.4   | 3.5  | 15.5 | 1.6  | 1.3  | 2.8  | 0.1 | 2.4  | 0.831081022 | 871.4  | 19.3  | 841.3  | 16.3 | 762.4  | 33.4  | -14.3 |
| Spot 130 | 131 | 362660.1 | 2.9  | 12.3 | 0.8  | 2.5  | 1.9  | 0.2 | 1.8  | 0.905126945 | 1304.3 | 20.7  | 1274.5 | 14.1 | 1224.7 | 16.2  | -6.5  |
| Spot 145 | 64  | 13475.2  | 2.7  | 14.5 | 3.7  | 1.6  | 5.2  | 0.2 | 3.6  | 0.701641297 | 1002.9 | 33.9  | 970.0  | 32.5 | 896.1  | 76.4  | -11.9 |
| Spot 149 | 37  | 5363.0   | 1.3  | 32.7 | 3.6  | 0.2  | 30.2 | 0.1 | 30.0 | 0.992705622 | 330.4  | 96.6  | 203.4  | 55.8 | NA     | NA    |       |
| Spot 154 | 38  | 5368.5   | 2.9  | 15.6 | 1.8  | 1.3  | 2.7  | 0.2 | 2.0  | 0.73590203  | 913.3  | 16.9  | 866.8  | 15.7 | 749.7  | 38.6  | -21.8 |
| Spot 164 | 132 | 20559.4  | 3.6  | 13.2 | 4.0  | 2.4  | 9.8  | 0.2 | 8.9  | 0.913441651 | 1321.3 | 106.7 | 1237.2 | 70.1 | 1093.7 | 79.7  | -20.8 |
| Spot 167 | 82  | 8139.2   | 3.1  | 13.2 | 1.1  | 2.1  | 1.7  | 0.2 | 1.3  | 0.737856918 | 1168.2 | 13.4  | 1140.5 | 11.6 | 1088.1 | 22.9  | -7.4  |
| Spot 169 | 401 | 21392.6  | 7.5  | 16.1 | 1.1  | 1.0  | 1.6  | 0.1 | 1.2  | 0.750669503 | 708.7  | 8.1   | 699.7  | 8.1  | 670.6  | 22.7  | -5.7  |
| Spot 171 | 178 | 19560.5  | 2.7  | 9.7  | 0.9  | 2.6  | 2.1  | 0.2 | 1.8  | 0.897726095 | 1094.2 | 18.5  | 1306.9 | 15.1 | 1675.4 | 16.7  | 34.7  |
| Spot 175 | 132 | 41660.8  | 7.8  | 14.7 | 1.0  | 1.5  | 1.7  | 0.2 | 1.3  | 0.781804908 | 955.4  | 11.5  | 928.8  | 10.1 | 866.3  | 21.5  | -10.3 |
| Spot 18  | 602 | 35632.3  | 3.1  | 11.8 | 1.1  | 2.0  | 2.2  | 0.2 | 1.9  | 0.868522634 | 1038.5 | 18.4  | 1127.3 | 15.1 | 1302.6 | 21.3  | 20.3  |
| Spot 182 | 195 | 24142.8  | 8.9  | 12.3 | 1.6  | 2.5  | 2.2  | 0.2 | 1.5  | 0.683856678 | 1306.1 | 18.1  | 1279.6 | 16.3 | 1235.4 | 32.1  | -5.7  |
| Spot 183 | 50  | 5065.5   | 2.3  | 4.1  | 11.1 | 5.5  | 11.5 | 0.2 | 2.9  | 0.249072802 | 980.1  | 26.0  | 1899.4 | 99.1 | 3137.1 | 177.7 | 68.8  |
| Spot 19  | 106 | 6046.3   | 1.7  | 20.9 | 2.3  | 0.6  | 16.1 | 0.1 | 15.9 | 0.99015684  | 516.6  | 79.2  | 445.6  | 58.2 | 93.6   | 53.4  | ####  |
| Spot 190 | 38  | 565.9    | 1.2  | 15.1 | 7.1  | 0.3  | 7.4  | 0.0 | 2.2  | 0.292497817 | 185.4  | 4.0   | 239.4  | 15.8 | 808.6  | 148.5 | 77.1  |
| Spot 192 | 229 | 37466.9  | 17.1 | 8.8  | 9.6  | 2.0  | 10.2 | 0.1 | 3.5  | 0.346916226 | 766.7  | 25.5  | 1105.7 | 68.7 | 1851.2 | 173.1 | 58.6  |
| Spot 201 | 43  | 2659.5   | 1.9  | 15.9 | 4.4  | 1.1  | 5.4  | 0.1 | 3.1  | 0.578223957 | 753.2  | 22.0  | 741.7  | 28.2 | 706.9  | 93.1  | -6.5  |
| Spot 211 | 463 | 297508.4 | 5.6  | 14.1 | 2.6  | 1.8  | 3.8  | 0.2 | 2.9  | 0.747172556 | 1087.2 | 28.7  | 1043.3 | 25.0 | 952.7  | 52.2  | -14.1 |
| Spot 217 | 73  | 25652.7  | 2.9  | 12.4 | 0.8  | 2.5  | 1.6  | 0.2 | 1.4  | 0.861653713 | 1286.1 | 16.4  | 1261.1 | 11.8 | 1218.7 | 16.3  | -5.5  |
| Spot 221 | 59  | 2048.8   | 1.3  | 23.2 | 5.9  | 0.2  | 13.8 | 0.0 | 12.5 | 0.905592294 | 190.1  | 23.5  | 166.1  | 21.2 | NA     | NA    |       |
| Spot 223 | 86  | 5867.2   | 3.0  | 17.3 | 2.0  | 1.0  | 2.8  | 0.1 | 1.9  | 0.677857416 | 786.0  | 13.9  | 721.2  | 14.3 | 524.6  | 44.7  | -49.8 |
| Spot 225 | 213 | 8203.5   | 1.9  | 21.8 | 2.7  | 0.2  | 10.9 | 0.0 | 10.6 | 0.968943947 | 216.4  | 22.4  | 198.7  | 19.7 | NA     | NA    |       |
| Spot 229 | 303 | 45901.6  | 20.2 | 11.4 | 0.8  | 2.1  | 1.7  | 0.2 | 1.5  | 0.895363607 | 1054.6 | 14.9  | 1164.0 | 11.8 | 1373.8 | 14.6  | 23.2  |
| Spot 235 | 23  | 3951.4   | 1.7  | 14.1 | 4.3  | 1.8  | 8.6  | 0.2 | 7.5  | 0.867406659 | 1098.7 | 75.7  | 1050.9 | 56.6 | 952.9  | 88.0  | -15.3 |
| Spot 238 | 52  | 1795.8   | 3.4  | 16.3 | 1.8  | 1.3  | 2.6  | 0.1 | 1.8  | 0.715336927 | 896.7  | 15.4  | 828.7  | 14.5 | 650.4  | 38.5  | -37.9 |
| Spot 257 | 53  | 2654.8   | 1.4  | 28.2 | 5.8  | 0.8  | 8.0  | 0.2 | 5.5  | 0.688195706 | 1005.2 | 51.3  | 611.3  | 36.8 | NA     | NA    |       |
| Spot 26  | 211 | 19378.9  | 8.8  | 14.1 | 1.0  | 1.7  | 1.5  | 0.2 | 1.2  | 0.774858113 | 1032.9 | 11.3  | 1006.1 | 9.8  | 948.0  | 19.8  | -9.0  |
| Spot 269 | 47  | 547.1    | 1.8  | 26.2 | 10.4 | 0.1  | 12.0 | 0.0 | 6.0  | 0.502181155 | 178.0  | 10.6  | 139.3  | 15.7 | NA     | NA    |       |
| Spot 270 | 87  | 7255.0   | 5.0  | 23.2 | 4.1  | 0.1  | 8.8  | 0.0 | 7.7  | 0.883052116 | 112.1  | 8.6   | 100.7  | 8.4  | NA     | NA    |       |
| Spot 282 | 76  | 12781.1  | 1.6  | 14.2 | 1.1  | 1.7  | 1.9  | 0.2 | 1.5  | 0.815288538 | 1012.6 | 14.1  | 991.5  | 11.7 | 945.1  | 22.0  | -7.1  |
| Spot 284 | 72  | 37195.5  | 1.9  | 16.2 | 2.0  | 1.0  | 2.7  | 0.1 | 1.9  | 0.697242315 | 745.3  | 13.4  | 726.6  | 14.1 | 669.1  | 41.8  | -11.4 |
| Spot 293 | 54  | 1352.9   | 4.7  | 19.5 | 7.4  | 0.1  | 12.1 | 0.0 | 9.5  | 0.789719547 | 100.4  | 9.5   | 106.8  | 12.2 | 253.7  | 170.4 | 60.4  |
| Spot 307 | 45  | 19721.9  | 3.4  | 14.7 | 1.5  | 1.5  | 1.9  | 0.2 | 1.2  | 0.620455157 | 933.7  | 10.1  | 915.8  | 11.3 | 873.0  | 30.5  | -7.0  |
| Spot 309 | 161 | 33286.5  | 8.6  | 7.3  | 2.1  | 2.3  | 2.7  | 0.1 | 1.7  | 0.640089738 | 749.6  | 12.3  | 1219.2 | 19.2 | 2184.5 | 36.2  | 65.7  |
| Spot 311 | 233 | 90752.6  | 2.8  | 13.2 | 1.6  | 1.3  | 2.4  | 0.1 | 1.8  | 0.746807646 | 746.2  | 12.6  | 836.0  | 13.7 | 1083.0 | 32.0  | 31.1  |
| Spot 34  | 868 | 20199.0  | 1.9  | 10.3 | 1.1  | 2.1  | 2.3  | 0.2 | 2.0  | 0.870995098 | 934.2  | 17.6  | 1143.7 | 16.0 | 1566.1 | 21.4  | 40.3  |
| Spot 43  | 27  | 28405.4  | 11.7 | 13.4 | 2.2  | 1.3  | 5.1  | 0.1 | 4.7  | 0.903766411 | 792.3  | 34.7  | 866.6  | 30.0 | 1061.6 | 44.3  | 25.4  |
| Spot 46  | 47  | 1883.6   | 4.2  | 15.2 | 1.6  | 1.4  | 2.1  | 0.2 | 1.4  | 0.650970224 | 944.4  | 12.1  | 903.2  | 12.6 | 803.5  | 33.6  | -17.5 |
| Spot 47  | 149 | 5815.5   | 3.7  | 14.8 | 1.1  | 1.5  | 1.7  | 0.2 | 1.3  | 0.766836509 | 982.4  | 12.2  | 942.0  | 10.7 | 848.8  | 23.2  | -15.7 |
| Spot 49  | 12  | 518.1    | 1.4  | 26.6 | 15.3 | 0.2  | 25.2 | 0.0 | 19.9 | 0.792562239 | 206.8  | 40.6  | 158.6  | 37.0 | NA     | NA    |       |

|         |     |          |     |      |     |      |      |     |      |             |        |      |        |      |        |       |       |
|---------|-----|----------|-----|------|-----|------|------|-----|------|-------------|--------|------|--------|------|--------|-------|-------|
| Spot 59 | 136 | 233978.8 | 2.8 | 21.3 | 4.2 | 0.1  | 11.7 | 0.0 | 11.0 | 0.934715282 | 99.1   | 10.8 | 96.9   | 10.8 | 40.8   | NA    | ####  |
| Spot 64 | 91  | 48051.9  | 1.9 | 15.0 | 1.1 | 1.5  | 2.1  | 0.2 | 1.8  | 0.858200489 | 963.8  | 16.2 | 921.8  | 12.8 | 822.8  | 22.6  | -17.1 |
| Spot 70 | 180 | 12827.9  | 2.0 | 15.8 | 0.9 | 1.1  | 1.7  | 0.1 | 1.4  | 0.827042483 | 762.2  | 10.0 | 751.0  | 8.9  | 717.9  | 20.0  | -6.2  |
| Spot 74 | 126 | 15149.4  | 3.2 | 13.2 | 1.1 | 2.1  | 1.8  | 0.2 | 1.4  | 0.77824703  | 1204.2 | 15.4 | 1164.6 | 12.5 | 1091.7 | 22.7  | -10.3 |
| Spot 76 | 212 | 59402.1  | 3.5 | 10.7 | 0.8 | 3.6  | 1.6  | 0.3 | 1.4  | 0.86711957  | 1586.8 | 19.0 | 1545.2 | 12.4 | 1488.8 | 14.7  | -6.6  |
| Spot 81 | 90  | 13986.4  | 0.7 | 13.9 | 7.0 | 0.3  | 9.3  | 0.0 | 6.1  | 0.658560116 | 200.0  | 12.0 | 276.5  | 22.4 | 986.6  | 142.0 | 79.7  |
| Spot 84 | 477 | 1918.1   | 0.6 | 10.7 | 5.1 | 2.0  | 5.5  | 0.2 | 2.2  | 0.39353189  | 908.6  | 18.5 | 1098.9 | 37.2 | 1498.2 | 96.3  | 39.4  |
| Spot 89 | 1   | 1000.0   | 0.8 | 5.2  | 1.0 | 27.0 | 1.2  | 1.0 | 0.6  | 0.51417895  | 4545.3 | 19.6 | 3384.8 | 11.4 | 2755.1 | 16.4  | -65.0 |
| Spot 95 | 31  | 2698.7   | 3.3 | 14.5 | 3.8 | 1.7  | 4.2  | 0.2 | 1.7  | 0.406410475 | 1043.0 | 16.5 | 997.6  | 26.7 | 899.0  | 79.4  | -16.0 |

|              |      |           |       |      |     |     |     |     |     |             |        |      |        |      |        |      |       |
|--------------|------|-----------|-------|------|-----|-----|-----|-----|-----|-------------|--------|------|--------|------|--------|------|-------|
| <b>Run 4</b> |      |           |       |      |     |     |     |     |     |             |        |      |        |      |        |      |       |
| Spot 1       | 328  | 13287.1   | 1.2   | 17.4 | 1.2 | 0.5 | 2.3 | 0.1 | 1.9 | 0.841986968 | 396.8  | 7.4  | 409.4  | 7.6  | 480.6  | 27.0 | 17.4  |
| Spot 2       | 1250 | 34857.6   | 2.8   | 20.1 | 2.1 | 0.1 | 2.4 | 0.0 | 1.2 | 0.495950331 | 70.9   | 0.8  | 73.9   | 1.7  | 170.5  | 49.0 | 58.4  |
| Spot 3       | 108  | 13346.4   | 0.7   | 16.8 | 1.4 | 0.7 | 2.3 | 0.1 | 1.7 | 0.766714071 | 562.9  | 9.3  | 562.9  | 9.7  | 563.1  | 31.5 | 0.0   |
| Spot 4       | 100  | 20982.9   | 3.3   | 14.6 | 2.4 | 1.4 | 3.7 | 0.1 | 2.8 | 0.757061425 | 882.6  | 22.9 | 877.7  | 21.6 | 865.5  | 49.7 | -2.0  |
| Spot 5       | 262  | 32923.6   | 2.6   | 13.3 | 0.9 | 1.7 | 1.8 | 0.2 | 1.6 | 0.869203288 | 998.1  | 14.8 | 1020.6 | 11.8 | 1069.0 | 18.3 | 6.6   |
| Spot 6       | 1850 | 401094.7  | 10.9  | 12.9 | 0.8 | 1.9 | 1.4 | 0.2 | 1.1 | 0.811078336 | 1060.5 | 11.1 | 1085.1 | 9.3  | 1134.9 | 16.3 | 6.6   |
| Spot 7       | 730  | 1058804.7 | 5.9   | 16.5 | 1.0 | 0.8 | 1.6 | 0.1 | 1.3 | 0.775754324 | 587.6  | 7.1  | 598.2  | 7.4  | 638.5  | 22.1 | 8.0   |
| Spot 8       | 530  | 152593.9  | 4.8   | 11.5 | 0.8 | 2.7 | 1.5 | 0.2 | 1.2 | 0.844256979 | 1294.8 | 14.6 | 1323.0 | 10.9 | 1369.1 | 15.2 | 5.4   |
| Spot 9       | 727  | 130011.4  | 7.7   | 12.7 | 0.7 | 2.0 | 1.3 | 0.2 | 1.1 | 0.856531048 | 1082.3 | 11.4 | 1116.0 | 9.1  | 1182.3 | 13.7 | 8.5   |
| Spot 10      | 177  | 7109.1    | 17.8  | 16.2 | 1.5 | 0.9 | 2.0 | 0.1 | 1.3 | 0.666842687 | 634.9  | 7.9  | 628.1  | 9.2  | 603.3  | 31.8 | -5.2  |
| Spot 11      | 136  | 13251.8   | 0.6   | 15.6 | 2.5 | 1.1 | 3.7 | 0.1 | 2.7 | 0.722918488 | 741.9  | 18.8 | 737.1  | 19.4 | 722.7  | 54.3 | -2.6  |
| Spot 13      | 50   | 8440.5    | 2.6   | 13.2 | 3.1 | 1.6 | 4.6 | 0.2 | 3.3 | 0.716093643 | 959.6  | 29.2 | 987.3  | 28.9 | 1049.5 | 64.5 | 8.6   |
| Spot 15      | 154  | 41222.1   | 8.5   | 12.5 | 0.9 | 2.2 | 1.7 | 0.2 | 1.5 | 0.855763487 | 1151.7 | 15.5 | 1168.9 | 11.9 | 1200.8 | 17.5 | 4.1   |
| Spot 16      | 243  | 6223.1    | 3.1   | 19.3 | 1.5 | 0.3 | 3.4 | 0.0 | 2.1 | 0.606152964 | 235.8  | 4.8  | 231.4  | 7.1  | 186.9  | 63.3 | -26.1 |
| Spot 17      | 81   | 740.6     | 1.2   | 17.9 | 4.6 | 0.1 | 5.0 | 0.0 | 1.9 | 0.384865704 | 173.7  | 3.3  | 128.7  | 6.0  | NA     | NA   |       |
| Spot 18      | 665  | 36820.6   | 21.5  | 12.2 | 0.8 | 2.3 | 1.4 | 0.2 | 1.1 | 0.820136873 | 1166.3 | 12.1 | 1196.9 | 9.7  | 1252.5 | 15.5 | 6.9   |
| Spot 19      | 438  | 104379.5  | 3.3   | 12.2 | 0.9 | 2.3 | 1.7 | 0.2 | 1.4 | 0.850690812 | 1211.6 | 16.0 | 1225.9 | 12.1 | 1251.1 | 17.5 | 3.2   |
| Spot 20      | 345  | 180060.1  | 8.3   | 12.1 | 0.7 | 2.3 | 1.7 | 0.2 | 1.5 | 0.896921997 | 1187.6 | 16.2 | 1214.9 | 11.8 | 1263.8 | 14.4 | 6.0   |
| Spot 21      | 289  | 14841.1   | 7.5   | 10.2 | 1.6 | 1.1 | 2.1 | 0.1 | 1.3 | 0.604805841 | 507.2  | 6.1  | 754.9  | 11.0 | 1581.5 | 30.8 | 67.9  |
| Spot 22      | 323  | 339169.0  | 3.8   | 12.1 | 0.9 | 2.3 | 1.7 | 0.2 | 1.5 | 0.860563891 | 1171.4 | 16.0 | 1207.0 | 12.3 | 1271.2 | 17.3 | 7.9   |
| Spot 23      | 315  | 90857.6   | 6.1   | 13.7 | 1.2 | 1.7 | 2.1 | 0.2 | 1.7 | 0.809060804 | 1005.4 | 15.5 | 1013.4 | 13.2 | 1030.8 | 24.5 | 2.5   |
| Spot 24      | 228  | 13623.6   | 256.1 | 16.3 | 1.2 | 0.8 | 2.3 | 0.1 | 1.9 | 0.836885789 | 609.8  | 11.3 | 613.9  | 10.7 | 628.8  | 27.4 | 3.0   |
| Spot 25      | 83   | 8338.8    | 3.0   | 12.8 | 2.6 | 1.9 | 5.5 | 0.2 | 4.8 | 0.881087842 | 1083.4 | 48.3 | 1097.0 | 36.9 | 1124.1 | 51.8 | 3.6   |
| Spot 26      | 481  | 28088.2   | 24.0  | 12.4 | 0.9 | 2.1 | 1.7 | 0.2 | 1.4 | 0.830226383 | 1132.8 | 14.5 | 1164.6 | 11.6 | 1224.1 | 18.4 | 7.5   |
| Spot 27      | 276  | 825.5     | 3.8   | 19.7 | 3.8 | 0.0 | 4.9 | 0.0 | 2.6 | 0.539334469 | 68.3   | 1.8  | 47.8   | 2.3  | NA     | NA   |       |
| Spot 28      | 364  | 105093.3  | 4.4   | 13.9 | 0.8 | 1.6 | 1.4 | 0.2 | 1.2 | 0.831617118 | 941.8  | 10.5 | 960.3  | 9.0  | 1002.7 | 16.2 | 6.1   |
| Spot 31      | 117  | 5723.4    | 1.1   | 16.9 | 1.4 | 0.6 | 2.1 | 0.1 | 1.3 | 0.632972212 | 509.0  | 6.4  | 506.0  | 8.3  | 492.1  | 35.5 | -3.4  |
| Spot 32      | 1137 | 22138.4   | 17.9  | 17.6 | 0.8 | 0.4 | 1.5 | 0.0 | 1.3 | 0.830280131 | 292.6  | 3.6  | 313.7  | 4.1  | 473.1  | 18.6 | 38.1  |
| Spot 33      | 1157 | 29771.2   | 9.4   | 17.3 | 0.9 | 0.6 | 1.5 | 0.1 | 1.2 | 0.77713275  | 479.1  | 5.4  | 485.9  | 5.8  | 518.5  | 20.8 | 7.6   |
| Spot 34      | 295  | 10717.7   | 10.6  | 19.5 | 1.6 | 0.3 | 2.4 | 0.0 | 1.5 | 0.636776397 | 232.8  | 3.5  | 230.2  | 4.9  | 203.7  | 42.8 | -14.3 |
| Spot 35      | 167  | 30720.3   | 1.7   | 19.2 | 1.8 | 0.3 | 3.2 | 0.0 | 2.6 | 0.823317039 | 265.5  | 6.9  | 268.1  | 7.5  | 290.7  | 41.5 | 8.7   |
| Spot 36      | 481  | 2403354.5 | 44.5  | 11.2 | 0.8 | 3.1 | 1.3 | 0.3 | 1.1 | 0.824115025 | 1442.1 | 14.3 | 1433.9 | 10.3 | 1421.8 | 14.5 | -1.4  |
| Spot 37      | 107  | 39910.7   | 4.2   | 11.7 | 0.9 | 2.6 | 1.5 | 0.2 | 1.2 | 0.786091192 | 1256.2 | 13.4 | 1287.4 | 10.9 | 1339.8 | 17.8 | 6.2   |

|         |      |          |      |      |     |     |     |     |     |              |        |      |        |      |        |      |       |
|---------|------|----------|------|------|-----|-----|-----|-----|-----|--------------|--------|------|--------|------|--------|------|-------|
| Spot 38 | 43   | 17438.3  | 2.1  | 14.0 | 1.8 | 1.4 | 2.5 | 0.1 | 1.8 | 0.6977771077 | 863.0  | 14.4 | 892.3  | 15.1 | 965.7  | 37.3 | 10.6  |
| Spot 40 | 499  | 145081.0 | 19.4 | 19.9 | 1.0 | 0.3 | 1.7 | 0.0 | 1.3 | 0.799402005  | 243.0  | 3.2  | 240.6  | 3.6  | 217.9  | 23.3 | -11.5 |
| Spot 41 | 753  | 12035.9  | 4.4  | 20.1 | 2.5 | 0.1 | 3.4 | 0.0 | 2.3 | 0.672941604  | 77.7   | 1.8  | 79.9   | 2.6  | 145.1  | 58.6 | 46.5  |
| Spot 42 | 180  | 38978.2  | 1.3  | 10.1 | 0.8 | 3.7 | 1.8 | 0.3 | 1.6 | 0.882675382  | 1538.1 | 21.4 | 1574.6 | 14.2 | 1623.8 | 15.5 | 5.3   |
| Spot 44 | 82   | 14423.2  | 1.6  | 12.0 | 1.1 | 2.4 | 2.0 | 0.2 | 1.6 | 0.794304397  | 1214.4 | 17.2 | 1237.0 | 14.0 | 1276.7 | 23.2 | 4.9   |
| Spot 45 | 333  | 34070.2  | 2.0  | 18.1 | 1.4 | 0.5 | 2.0 | 0.1 | 1.4 | 0.714466803  | 431.0  | 5.8  | 430.4  | 6.9  | 426.7  | 30.6 | -1.0  |
| Spot 46 | 552  | 25398.0  | 4.9  | 16.3 | 0.8 | 0.9 | 1.8 | 0.1 | 1.6 | 0.884846105  | 628.3  | 9.5  | 632.5  | 8.4  | 647.6  | 17.9 | 3.0   |
| Spot 47 | 168  | 653.3    | 3.3  | 20.8 | 3.3 | 0.0 | 4.5 | 0.0 | 2.0 | 0.440219464  | 66.6   | 1.3  | 35.6   | 1.6  | NA     | NA   |       |
| Spot 48 | 1197 | 35179.7  | 2.3  | 11.3 | 0.9 | 2.8 | 1.7 | 0.2 | 1.4 | 0.837093245  | 1333.5 | 17.2 | 1358.9 | 12.8 | 1398.9 | 17.9 | 4.7   |
| Spot 49 | 180  | 13543.8  | 2.6  | 12.8 | 0.9 | 1.9 | 1.6 | 0.2 | 1.2 | 0.780541709  | 1061.8 | 11.9 | 1087.3 | 10.4 | 1138.7 | 19.3 | 6.8   |
| Spot 50 | 491  | 303462.6 | 13.2 | 8.1  | 0.8 | 5.8 | 1.6 | 0.3 | 1.4 | 0.864039696  | 1874.2 | 22.4 | 1950.3 | 13.8 | 2032.0 | 14.2 | 7.8   |
| Spot 51 | 227  | 16307.4  | 1.4  | 18.6 | 1.9 | 0.3 | 2.4 | 0.0 | 1.5 | 0.603574522  | 259.2  | 3.8  | 267.9  | 5.8  | 344.5  | 44.2 | 24.8  |
| Spot 52 | 118  | 8241.9   | 3.4  | 13.5 | 1.2 | 1.7 | 1.8 | 0.2 | 1.4 | 0.761373384  | 994.7  | 12.6 | 1000.9 | 11.5 | 1014.4 | 23.6 | 1.9   |
| Spot 53 | 356  | 32469.3  | 4.2  | 15.9 | 0.9 | 1.0 | 1.7 | 0.1 | 1.4 | 0.832860931  | 675.8  | 9.0  | 683.4  | 8.4  | 708.4  | 19.8 | 4.6   |
| Spot 54 | 497  | 66981.3  | 4.4  | 13.2 | 1.0 | 1.8 | 1.5 | 0.2 | 1.1 | 0.731024095  | 1015.7 | 10.1 | 1041.0 | 9.6  | 1094.4 | 20.1 | 7.2   |
| Spot 55 | 206  | 9361.8   | 1.4  | 16.8 | 0.9 | 0.7 | 1.7 | 0.1 | 1.4 | 0.844415104  | 567.2  | 7.8  | 563.2  | 7.3  | 546.7  | 19.8 | -3.8  |
| Spot 57 | 25   | 2797.0   | 2.8  | 12.3 | 3.7 | 2.0 | 5.5 | 0.2 | 3.7 | 0.662912082  | 1115.6 | 37.5 | 1115.8 | 37.4 | 1116.3 | 82.6 | 0.1   |
| Spot 58 | 58   | 4033.0   | 2.9  | 12.0 | 2.4 | 2.0 | 3.1 | 0.2 | 1.9 | 0.608692359  | 1081.8 | 18.5 | 1122.3 | 20.8 | 1201.6 | 47.8 | 10.0  |
| Spot 59 | 79   | 34481.3  | 2.4  | 14.1 | 1.5 | 1.5 | 2.3 | 0.2 | 1.7 | 0.732402094  | 946.6  | 14.6 | 946.9  | 13.9 | 947.6  | 31.6 | 0.1   |
| Spot 60 | 183  | 11545.0  | 2.5  | 18.2 | 2.0 | 0.4 | 2.6 | 0.1 | 1.6 | 0.610382407  | 347.7  | 5.4  | 350.3  | 7.8  | 368.2  | 46.7 | 5.6   |
| Spot 61 | 177  | 197463.4 | 7.3  | 12.4 | 1.0 | 2.3 | 1.8 | 0.2 | 1.5 | 0.82958433   | 1210.2 | 16.7 | 1213.8 | 12.9 | 1220.4 | 20.1 | 0.8   |
| Spot 62 | 180  | 32392.1  | 5.7  | 12.9 | 2.6 | 1.9 | 2.8 | 0.2 | 1.2 | 0.410343997  | 1040.4 | 11.1 | 1071.0 | 18.6 | 1133.8 | 51.2 | 8.2   |
| Spot 63 | 48   | 3349.8   | 3.4  | 12.4 | 3.1 | 1.6 | 3.5 | 0.2 | 1.6 | 0.438844208  | 909.3  | 13.2 | 971.5  | 22.2 | 1114.9 | 63.6 | 18.4  |
| Spot 64 | 132  | 39537.3  | 2.3  | 19.1 | 1.4 | 0.3 | 1.9 | 0.0 | 1.3 | 0.688978225  | 275.4  | 3.5  | 276.9  | 4.6  | 290.1  | 31.5 | 5.1   |
| Spot 65 | 2035 | 53023.3  | 18.5 | 13.3 | 0.9 | 1.5 | 1.6 | 0.1 | 1.3 | 0.834169088  | 886.2  | 11.1 | 940.9  | 9.9  | 1071.3 | 17.8 | 17.3  |
| Spot 66 | 747  | 42896.7  | 9.4  | 13.4 | 0.9 | 1.2 | 2.7 | 0.1 | 2.6 | 0.938952826  | 692.6  | 16.8 | 785.9  | 14.9 | 1060.8 | 18.9 | 34.7  |
| Spot 67 | 122  | 57437.1  | 2.7  | 14.3 | 2.6 | 1.6 | 4.8 | 0.2 | 4.0 | 0.841051925  | 972.3  | 36.2 | 959.2  | 29.6 | 929.3  | 53.0 | -4.6  |
| Spot 68 | 215  | 214053.7 | 2.6  | 10.7 | 0.8 | 3.2 | 1.5 | 0.2 | 1.2 | 0.830057276  | 1407.4 | 15.7 | 1446.6 | 11.6 | 1504.6 | 15.8 | 6.5   |
| Spot 69 | 208  | 5260.6   | 1.1  | 18.4 | 1.7 | 0.3 | 3.2 | 0.0 | 2.0 | 0.605500604  | 282.9  | 5.4  | 282.6  | 8.0  | 279.9  | 59.0 | -1.1  |
| Spot 70 | 411  | 20066.8  | 10.0 | 15.9 | 0.9 | 0.9 | 1.4 | 0.1 | 1.1 | 0.743554088  | 659.8  | 6.7  | 665.2  | 7.0  | 683.5  | 20.4 | 3.5   |
| Spot 71 | 657  | 12119.6  | 14.0 | 20.1 | 1.6 | 0.2 | 2.7 | 0.0 | 2.2 | 0.799224066  | 226.4  | 4.9  | 218.6  | 5.4  | 134.9  | 38.6 | -67.8 |
| Spot 73 | 256  | 20405.0  | 2.0  | 18.8 | 1.2 | 0.3 | 2.0 | 0.0 | 1.6 | 0.7890935    | 260.5  | 4.0  | 265.6  | 4.7  | 311.0  | 28.0 | 16.2  |
| Spot 74 | 248  | 89494.1  | 1.1  | 17.3 | 1.9 | 0.6 | 2.9 | 0.1 | 2.1 | 0.745046753  | 450.6  | 9.3  | 461.6  | 10.6 | 516.8  | 41.9 | 12.8  |
| Spot 75 | 311  | 92736.9  | 3.0  | 12.5 | 1.0 | 2.1 | 1.6 | 0.2 | 1.3 | 0.792744794  | 1142.8 | 13.1 | 1160.6 | 10.9 | 1194.0 | 19.0 | 4.3   |
| Spot 76 | 95   | 3128.1   | 4.3  | 16.6 | 2.5 | 0.4 | 3.7 | 0.1 | 1.4 | 0.375171491  | 347.9  | 4.7  | 358.3  | 11.3 | 426.0  | 77.3 | 18.3  |
| Spot 77 | 201  | 98380.8  | 2.8  | 16.2 | 1.7 | 0.8 | 2.4 | 0.1 | 1.6 | 0.693987478  | 564.9  | 8.9  | 582.4  | 10.5 | 651.1  | 36.6 | 13.2  |
| Spot 78 | 178  | 17263.2  | 2.0  | 19.0 | 1.7 | 0.3 | 2.4 | 0.0 | 1.7 | 0.68299664   | 273.0  | 4.4  | 273.1  | 5.8  | 273.5  | 40.5 | 0.2   |
| Spot 79 | 593  | 8019.0   | 1.6  | 19.1 | 1.2 | 0.3 | 1.7 | 0.0 | 1.2 | 0.723041449  | 262.2  | 3.2  | 258.2  | 3.9  | 221.9  | 27.3 | -18.2 |
| Spot 81 | 165  | 7989.2   | 1.2  | 18.5 | 3.0 | 0.3 | 3.6 | 0.0 | 1.9 | 0.520133934  | 267.1  | 4.9  | 269.4  | 8.6  | 289.5  | 70.7 | 7.7   |
| Spot 83 | 175  | 50507.3  | 3.2  | 13.8 | 0.9 | 1.6 | 1.4 | 0.2 | 1.1 | 0.788351244  | 980.3  | 10.0 | 980.4  | 8.8  | 980.5  | 17.5 | 0.0   |
| Spot 84 | 55   | 6675.9   | 1.8  | 13.4 | 2.1 | 1.4 | 4.8 | 0.1 | 4.3 | 0.899778173  | 835.2  | 33.9 | 882.5  | 28.3 | 1003.0 | 42.6 | 16.7  |
| Spot 85 | 188  | 16078.3  | 1.2  | 13.7 | 1.1 | 1.5 | 1.9 | 0.2 | 1.5 | 0.791188865  | 931.2  | 12.9 | 947.9  | 11.6 | 986.8  | 23.5 | 5.6   |
| Spot 86 | 179  | 1805.0   | 1.1  | 20.6 | 2.0 | 0.2 | 3.6 | 0.0 | 3.0 | 0.811149719  | 176.3  | 5.1  | 145.3  | 4.9  | NA     | NA   |       |



|                         |     |           |      |      |      |     |      |     |      |             |        |       |        |      |        |       |       |
|-------------------------|-----|-----------|------|------|------|-----|------|-----|------|-------------|--------|-------|--------|------|--------|-------|-------|
| Spot 87                 | 974 | 35757.8   | 1.9  | 19.1 | 0.9  | 0.3 | 1.4  | 0.0 | 1.1  | 0.775720871 | 267.7  | 2.9   | 268.5  | 3.3  | 275.7  | 20.3  | 2.9   |
| Spot 89                 | 495 | 43265.7   | 1.5  | 19.4 | 1.4  | 0.2 | 2.2  | 0.0 | 1.7  | 0.777327078 | 223.2  | 3.7   | 224.9  | 4.4  | 242.0  | 31.9  | 7.7   |
| Spot 90                 | 113 | 3601.3    | 1.6  | 17.7 | 4.0  | 0.2 | 4.5  | 0.0 | 2.0  | 0.436762035 | 166.8  | 3.3   | 175.6  | 7.3  | 296.5  | 92.8  | 43.8  |
| Spot 91                 | 395 | 31236.5   | 2.5  | 12.6 | 1.1  | 2.0 | 1.6  | 0.2 | 1.2  | 0.746974201 | 1079.1 | 11.9  | 1109.1 | 10.8 | 1168.3 | 21.1  | 7.6   |
| Spot 92                 | 238 | 5586.1    | 10.0 | 17.7 | 2.9  | 0.3 | 3.7  | 0.0 | 1.8  | 0.493805798 | 240.2  | 4.3   | 251.4  | 8.2  | 357.4  | 72.6  | 32.8  |
| Spot 93                 | 186 | 9099.3    | 1.3  | 19.1 | 2.7  | 0.2 | 3.6  | 0.0 | 2.3  | 0.642860039 | 200.8  | 4.5   | 202.7  | 6.6  | 225.0  | 63.2  | 10.7  |
| Spot 95                 | 301 | 864.7     | 1.8  | 20.7 | 3.4  | 0.0 | 5.7  | 0.0 | 3.6  | 0.628589959 | 56.6   | 2.0   | 37.3   | 2.1  | NA     | NA    |       |
| Spot 96                 | 195 | 4912.4    | 1.6  | 20.6 | 2.3  | 0.2 | 3.3  | 0.0 | 2.1  | 0.645795788 | 165.0  | 3.4   | 152.3  | 4.6  | NA     | NA    |       |
| Spot 97                 | 160 | 18164.9   | 1.9  | 18.4 | 1.3  | 0.3 | 2.0  | 0.0 | 1.5  | 0.752024525 | 267.3  | 4.0   | 274.5  | 4.9  | 337.1  | 30.2  | 20.7  |
| Spot 99                 | 198 | 32652.8   | 3.7  | 14.2 | 1.1  | 1.5 | 4.6  | 0.2 | 4.4  | 0.971874528 | 923.1  | 38.3  | 920.2  | 27.7 | 913.2  | 22.2  | -1.1  |
| Spot 100                | 224 | 17362.5   | 13.1 | 13.8 | 1.1  | 1.6 | 1.8  | 0.2 | 1.4  | 0.77548757  | 981.0  | 12.7  | 977.2  | 11.3 | 968.8  | 23.3  | -1.2  |
| Spot 101                | 39  | 8325.7    | 2.3  | 14.1 | 1.5  | 1.4 | 2.4  | 0.1 | 1.5  | 0.640811342 | 895.9  | 12.6  | 893.7  | 14.0 | 888.1  | 37.4  | -0.9  |
| Spot 102                | 193 | 364795.2  | 2.5  | 12.1 | 1.0  | 2.4 | 1.5  | 0.2 | 1.2  | 0.770461696 | 1214.9 | 13.1  | 1228.1 | 10.9 | 1251.4 | 19.1  | 2.9   |
| Spot 103                | 689 | 4572.3    | 1.7  | 14.1 | 1.2  | 0.7 | 1.9  | 0.1 | 1.5  | 0.786701353 | 449.6  | 6.6   | 522.5  | 7.9  | 855.1  | 24.8  | 47.4  |
| Spot 105                | 71  | 1343.5    | 1.0  | 16.8 | 4.3  | 0.3 | 5.5  | 0.0 | 3.2  | 0.59055595  | 247.8  | 7.8   | 235.5  | 11.5 | 114.3  | 103.9 | ####  |
| Spot 106                | 88  | 4568.4    | 3.0  | 16.6 | 2.4  | 0.6 | 2.9  | 0.1 | 1.6  | 0.549616472 | 472.1  | 7.3   | 473.9  | 11.0 | 482.9  | 53.8  | 2.3   |
| Spot 107                | 54  | 5380.7    | 2.4  | 12.4 | 1.3  | 2.2 | 2.5  | 0.2 | 1.8  | 0.693902199 | 1197.3 | 19.2  | 1178.1 | 17.6 | 1142.9 | 36.2  | -4.8  |
| Spot 108                | 327 | 12814.7   | 1.1  | 19.9 | 2.1  | 0.2 | 3.0  | 0.0 | 2.2  | 0.736145624 | 163.3  | 3.6   | 162.1  | 4.6  | 144.0  | 48.3  | -13.5 |
| Spot 109                | 529 | 4821026.6 | 7.4  | 11.9 | 0.9  | 2.4 | 1.8  | 0.2 | 1.6  | 0.859142954 | 1218.1 | 17.6  | 1240.4 | 13.2 | 1279.3 | 18.4  | 4.8   |
| Spot 110                | 80  | 5841.0    | 1.4  | 5.2  | 16.6 | 0.7 | 17.0 | 0.0 | 3.6  | 0.215120695 | 179.5  | 6.5   | 562.1  | 73.4 | 2741.5 | 274.6 | 93.5  |
| Run 4 NM8A (discordant) |     |           |      |      |      |     |      |     |      |             |        |       |        |      |        |       |       |
| Spot 104                | 38  | 7526.6    | 1.7  | 11.9 | 2.8  | 1.9 | 4.4  | 0.2 | 3.4  | 0.774972995 | 986.9  | 31.4  | 1086.8 | 29.6 | 1293.0 | 54.4  | 23.7  |
| Spot 12                 | 40  | 1191.3    | 1.4  | 17.8 | 6.6  | 0.2 | 8.9  | 0.0 | 6.0  | 0.676079042 | 175.6  | 10.5  | 197.1  | 16.0 | 463.1  | 146.1 | 62.1  |
| Spot 14                 | 293 | 5667.2    | 1.3  | 20.5 | 2.5  | 0.3 | 7.1  | 0.0 | 6.7  | 0.935729808 | 287.3  | 18.8  | 271.7  | 17.0 | 139.3  | 59.1  | ####  |
| Spot 29                 | 35  | 592.9     | 1.7  | 31.6 | 12.2 | 0.1 | 14.2 | 0.0 | 7.2  | 0.507756888 | 192.7  | 13.7  | 126.2  | 16.8 | NA     | NA    |       |
| Spot 30                 | 209 | 5059.6    | 0.7  | 20.9 | 2.5  | 0.2 | 9.6  | 0.0 | 9.2  | 0.964907601 | 188.8  | 17.2  | 181.5  | 15.9 | 87.0   | 59.6  | ####  |
| Spot 39                 | 94  | 664929.8  | 2.4  | 11.7 | 1.6  | 2.9 | 4.3  | 0.2 | 4.0  | 0.928641057 | 1429.4 | 51.2  | 1388.5 | 32.5 | 1326.3 | 30.9  | -7.8  |
| Spot 43                 | 22  | 304.7     | 1.4  | 31.2 | 12.9 | 0.1 | 18.8 | 0.0 | 13.7 | 0.726172518 | 169.9  | 22.9  | 113.2  | 20.2 | NA     | NA    |       |
| Spot 56                 | 68  | 2723.8    | 2.8  | 15.6 | 1.7  | 1.3 | 2.3  | 0.1 | 1.5  | 0.665396863 | 882.0  | 12.6  | 845.0  | 13.1 | 749.1  | 36.1  | -17.7 |
| Spot 72                 | 33  | 259.3     | 1.3  | 91.9 | 8.9  | 0.0 | 10.1 | 0.0 | 4.8  | 0.478858447 | 189.3  | 9.0   | 44.4   | 4.4  | NA     | NA    |       |
| Spot 80                 | 429 | 144188.9  | 5.5  | 15.9 | 2.9  | 1.3 | 14.8 | 0.2 | 14.5 | 0.980719735 | 930.3  | 126.0 | 864.0  | 86.5 | 697.4  | 61.7  | -33.4 |
| Spot 82                 | 194 | 4539.2    | 1.6  | 23.7 | 2.2  | 0.2 | 9.7  | 0.0 | 9.4  | 0.972995699 | 263.5  | 24.3  | 220.2  | 19.2 | NA     | NA    |       |
| Spot 88                 | 153 | 32285.2   | 3.9  | 13.0 | 1.0  | 2.2 | 1.5  | 0.2 | 1.2  | 0.781809447 | 1206.3 | 13.3  | 1174.6 | 10.7 | 1116.7 | 19.2  | -8.0  |
| Spot 94                 | 30  | 711.3     | 2.2  | 17.1 | 14.5 | 0.3 | 19.5 | 0.0 | 12.9 | 0.664517535 | 201.7  | 25.7  | 231.0  | 40.2 | 540.8  | 319.6 | 62.7  |
| Spot 98                 | 54  | 9515.8    | 3.4  | 16.3 | 2.3  | 1.0 | 3.2  | 0.1 | 2.2  | 0.687646786 | 752.4  | 15.5  | 727.7  | 16.5 | 652.3  | 49.5  | -15.3 |
