# Supplementary material for: Increased accuracy and precision in igneous and detrital zircon geochronology using CA-LA-ICPMS
Source: Copernicus journal article supplement (doi:10.5194/gchron-2023-20), 2023-08-25
Supplement: Supplementary file 11 [file gchron-2023-20-supplement.zip]

**TABLE S15: MIGU-02 CA-ID-TIMS U-Pb ZIRCON GEOCHRONOLOGY**

| Zircon   | Dates (Ma)  |            |                |            | Composition     |            |            |                |          |             |             | Isotopic Ratios |                 |                |           |                |           |                 |           |
|----------|-------------|------------|----------------|------------|-----------------|------------|------------|----------------|----------|-------------|-------------|-----------------|-----------------|----------------|-----------|----------------|-----------|-----------------|-----------|
|          | 206Pb/<br># | 2σ<br>(Ma) | 207Pb/<br>235U | 2σ<br>(Ma) | 206Pb/<br>207Pb | 2σ<br>(Ma) | %<br>Disc. | Corr.<br>Coef. | Th/<br>U | Pbc<br>(pg) | Pb*/<br>Pbc | 206Pb/<br>204Pb | 208Pb/<br>206Pb | 206Pb/<br>238U | 2σ<br>(%) | 207Pb/<br>235U | 2σ<br>(%) | 207Pb/<br>206Pb | 2σ<br>(%) |
| MIGU z02 | 1394.7      | 1.1        | 1394.4         | 1.1        | 1394.1          | 1.8        | 0.807      | -0.04          | 0.79     | 0.54        | 181         | 18408           | 0.235           | 0.24153        | 0.084     | 2.9484         | 0.15      | 0.08857         | 0.087     |
| MIGU z03 | 1390.1      | 1.1        | 1391.9         | 1.4        | 1394.6          | 2.6        | 0.714      | 0.32           | 0.46     | 0.48        | 59          | 7372            | 0.136           | 0.24066        | 0.085     | 2.9386         | 0.18      | 0.0886          | 0.13      |
| MIGU z04 | 1391.9      | 1.4        | 1392.6         | 2.3        | 1393.9          | 4.8        | 0.602      | 0.14           | 0.45     | 0.45        | 25.4        | 3386            | 0.134           | 0.24099        | 0.11      | 2.9414         | 0.3       | 0.08856         | 0.25      |
| MIGU z05 | 1390.9      | 0.9        | 1392.2         | 1.2        | 1394.2          | 1.9        | 0.873      | 0.23           | 0.47     | 0.38        | 114         | 17951           | 0.139           | 0.24082        | 0.072     | 2.9398         | 0.15      | 0.08858         | 0.092     |
| MIGU z06 | 1396        | 3.1        | 1398.3         | 5.6        | 1402            | 12         | 0.573      | 0.42           | 0.49     | 0.61        | 14          | 1387            | 0.147           | 0.24179        | 0.25      | 2.964          | 0.74      | 0.08893         | 0.63      |
| MIGU z07 | 1400        | 6.2        | 1397.6         | 4.6        | 1393.9          | 6          | 0.855      | -0.44          | 0.53     | 0.09        | 4.26        | 2721            | 0.157           | 0.2426         | 0.5       | 2.961          | 0.61      | 0.08857         | 0.31      |
