# Supplementary material for: Increased accuracy and precision in igneous and detrital zircon geochronology using CA-LA-ICPMS
Source: Copernicus journal article supplement (doi:10.5194/gchron-2023-20), 2023-08-25
Supplement: Supplementary file 14 [file gchron-2023-20-supplement.zip]

TABLE S10: FC1 LA-ICPMS U-Pb ZIRCON GEOCHRONOLOGY

| Zircon #                     | Composition |             |      |             |        | Ages       |        |            |        |             |            |         |            |         |                  |           | % Disc. |
|------------------------------|-------------|-------------|------|-------------|--------|------------|--------|------------|--------|-------------|------------|---------|------------|---------|------------------|-----------|---------|
|                              | U (ppm)     | 206Pb/204Pb | U/Th | 206Pb/207Pb | 2σ (%) | 207Pb/235U | 2σ (%) | 206Pb/238U | 2σ (%) | Error Corr. | 206Pb/238U | 2σ (Ma) | 207Pb/235U | 2σ (Ma) | 206Pb/207Pb (Ma) |           |         |
| FC1 no CA Run 1              |             |             |      |             |        |            |        |            |        |             |            |         |            |         |                  |           |         |
| FC1-11                       | 255         | 31761       | 1.73 | 13.305      | 1.6    | 1.9048     | 3.7    | 0.18389    | 3.3    | 0.899       | 1088.2     | 33.2    | 1082.8     | 24.5    | ####             | 32.3 -1.5 |         |
| FC1-12                       | 397         | 318394      | 2.04 | 12.932      | 1.8    | 1.9441     | 3.0    | 0.18242    | 2.4    | 0.802       | 1080.2     | 23.7    | 1096.4     | 19.9    | ####             | 35.4 4.3  |         |
| FC1-13                       | 248         | 26223       | 1.71 | 12.980      | 2.0    | 1.9681     | 3.7    | 0.18536    | 3.0    | 0.830       | 1096.2     | 30.6    | 1104.7     | 24.6    | ####             | 40.7 2.2  |         |
| FC1-14                       | 339         | 30198       | 1.65 | 13.093      | 1.8    | 1.9561     | 3.2    | 0.18584    | 2.6    | 0.826       | 1098.8     | 26.4    | 1100.6     | 21.2    | ####             | 35.6 0.5  |         |
| FC1-15                       | 461         | 53851       | 1.39 | 12.761      | 2.5    | 1.9495     | 5.1    | 0.18051    | 4.5    | 0.872       | 1069.7     | 44.1    | 1098.3     | 34.4    | ####             | 49.8 7.4  |         |
| FC1-16                       | 457         | 63839       | 1.72 | 13.074      | 1.9    | 1.9528     | 3.8    | 0.18524    | 3.3    | 0.866       | 1095.6     | 32.8    | 1099.4     | 25.2    | ####             | 37.6 1.0  |         |
| FC1-17                       | 269         | 20204       | 1.28 | 13.106      | 1.8    | 1.9332     | 3.6    | 0.18384    | 3.1    | 0.860       | 1087.9     | 31.1    | 1092.6     | 24.1    | ####             | 36.8 1.3  |         |
| FC1-21                       | 305         | 36493       | 1.62 | 13.173      | 1.6    | 1.9273     | 3.2    | 0.18422    | 2.8    | 0.864       | 1090.0     | 27.9    | 1090.6     | 21.6    | ####             | 32.5 0.2  |         |
| FC1-22                       | 499         | 248861      | 1.80 | 13.091      | 1.8    | 1.9446     | 2.9    | 0.18471    | 2.3    | 0.782       | 1092.7     | 23.2    | 1096.6     | 19.8    | ####             | 36.7 1.1  |         |
| FC1-23                       | 257         | 15855       | 1.64 | 13.154      | 2.3    | 1.9351     | 3.8    | 0.18469    | 2.9    | 0.780       | 1092.6     | 29.4    | 1093.3     | 25.1    | ####             | 47.0 0.2  |         |
| FC1-24                       | 406         | 327238      | 2.45 | 13.210      | 1.6    | 1.9649     | 3.2    | 0.18834    | 2.8    | 0.866       | 1112.4     | 28.4    | 1103.6     | 21.6    | ####             | 32.2 -2.4 |         |
| FC1-26                       | 362         | 162029      | 1.75 | 12.905      | 1.6    | 1.8968     | 3.5    | 0.17761    | 3.2    | 0.896       | 1053.9     | 30.8    | 1080.0     | 23.5    | ####             | 31.2 7.0  |         |
| FC1-27                       | 161         | 101999      | 1.94 | 13.167      | 2.3    | 2.0000     | 4.1    | 0.19108    | 3.4    | 0.826       | 1127.2     | 35.0    | 1115.5     | 27.7    | ####             | 46.2 -3.1 |         |
| FC1-28                       | 234         | 162002      | 1.99 | 13.274      | 2.3    | 1.9478     | 3.6    | 0.18761    | 2.8    | 0.776       | 1108.4     | 28.3    | 1097.7     | 24.0    | ####             | 45.3 -3.0 |         |
| FC1-29                       | 450         | 30241       | 1.45 | 12.857      | 2.1    | 1.8497     | 4.2    | 0.17256    | 3.6    | 0.866       | 1026.2     | 34.6    | 1063.3     | 27.8    | ####             | 41.9 10.0 |         |
| FC1-3                        | 381         | 35829       | 1.84 | 13.282      | 1.9    | 1.8593     | 4.7    | 0.17918    | 4.3    | 0.920       | 1062.5     | 42.6    | 1066.7     | 31.2    | ####             | 37.1 1.2  |         |
| FC1-30                       | 491         | 56192       | 2.32 | 13.145      | 1.9    | 1.9059     | 3.1    | 0.18178    | 2.5    | 0.798       | 1076.7     | 24.6    | 1083.2     | 20.7    | ####             | 37.6 1.8  |         |
| FC1-4                        | 345         | 20308       | 1.70 | 13.351      | 2.1    | 1.8882     | 3.2    | 0.18292    | 2.4    | 0.755       | 1082.9     | 23.8    | 1077.0     | 21.0    | ####             | 41.6 -1.7 |         |
| FC1-5                        | 90          | 149727      | 3.24 | 12.816      | 3.1    | 1.9178     | 4.4    | 0.17833    | 3.2    | 0.721       | 1057.8     | 31.1    | 1087.3     | 29.5    | ####             | 60.8 7.8  |         |
| FC1-7                        | 1262        | 69338       | 1.75 | 13.096      | 1.9    | 1.9857     | 3.0    | 0.18868    | 2.4    | 0.790       | 1114.2     | 24.5    | 1110.6     | 20.5    | ####             | 37.2 -1.0 |         |
| FC1-8                        | 166         | 56009       | 2.69 | 13.242      | 1.9    | 1.9632     | 3.4    | 0.18864    | 2.8    | 0.828       | 1114.0     | 28.8    | 1103.0     | 22.9    | ####             | 38.3 -3.0 |         |
| FC1 no CA Run 1 (discordant) |             |             |      |             |        |            |        |            |        |             |            |         |            |         |                  |           |         |
| FC1-10                       | 284         | 17033       | 1.74 | 13.195      | 2.2    | 2.0680     | 4.1    | 0.19800    | 3.5    | 0.847       | 1164.5     | 36.8    | 1138.3     | 27.9    | ####             | 43.4 -7.0 |         |
| FC1-2                        | 206         | 11929       | 1.98 | 13.533      | 1.7    | 1.9200     | 4.7    | 0.18854    | 4.4    | 0.930       | 1113.5     | 44.8    | 1088.1     | 31.4    | ####             | 35.0 -7.3 |         |
| FC1-6                        | 172         | 9258        | 1.37 | 13.531      | 3.4    | 1.9290     | 5.6    | 0.18940    | 4.4    | 0.791       | 1118.1     | 45.6    | 1091.2     | 37.6    | ####             | 69.4 -7.7 |         |
| FC1 no CA Run 2              |             |             |      |             |        |            |        |            |        |             |            |         |            |         |                  |           |         |
| FC 1                         | 523         | 2E+07       | 1.65 | 13.093      | 2.2    | 1.952      | 3.4    | 0.18543    | 2.6    | 0.761       | 1096.6     | 26.1    | 1099.1     | 22.8    | 1104             | 44.2 0.7  |         |
| FC 11                        | 333         | 353223      | 2.26 | 13.227      | 1.7    | 1.947      | 2.9    | 0.18683    | 2.4    | 0.822       | 1104.2     | 24.3    | 1097.3     | 19.6    | 1084             | 33.3 -1.9 |         |
| FC 12                        | 326         | 417199      | 1.53 | 13.117      | 2.3    | 1.946      | 3.7    | 0.18524    | 2.8    | 0.768       | 1095.5     | 28.2    | 1097.2     | 24.5    | 1100             | 46.8 0.4  |         |
| FC 13                        | 788         | 1E+06       | 1.84 | 13.028      | 1.6    | 1.977      | 2.7    | 0.18688    | 2.1    | 0.789       | 1104.4     | 21.2    | 1107.7     | 17.9    | 1114             | 32.5 0.9  |         |
| FC 15                        | 891         | 1E+06       | 1.6  | 13.014      | 1.8    | 1.98       | 2.8    | 0.18694    | 2.1    | 0.769       | 1104.8     | 21.7    | 1108.6     | 18.8    | 1116             | 35.6 1.0  |         |
| FC 16                        | 136         | 202949      | 2.48 | 13.085      | 2      | 1.959      | 3.5    | 0.18596    | 2.8    | 0.822       | 1099.5     | 28.8    | 1101.4     | 23.3    | 1105             | 39.3 0.5  |         |
| FC 17                        | 771         | 592597      | 1.89 | 13.203      | 1.6    | 1.963      | 2.6    | 0.18803    | 2.1    | 0.801       | 1110.7     | 21.6    | 1102.8     | 17.8    | 1087             | 31.8 -2.2 |         |
| FC 18                        | 297         | 351347      | 1.83 | 13.197      | 1.8    | 1.924      | 3.1    | 0.1842     | 2.5    | 0.823       | 1089.9     | 25.5    | 1089.3     | 20.7    | 1088             | 35.2 -0.2 |         |
| FC 19                        | 738         | 590751      | 1.94 | 13.031      | 1.4    | 1.95       | 2.6    | 0.18437    | 2.2    | 0.83        | 1090.8     | 21.6    | 1098.4     | 17.4    | 1114             | 28.9 2.0  |         |
| FC 2                         | 247         | 356446      | 1.64 | 13.215      | 2      | 1.944      | 3.1    | 0.18639    | 2.3    | 0.748       | 1101.8     | 23.2    | 1096.3     | 20.5    | 1086             | 40.6 -1.5 |         |
| FC 20                        | 306         | 1E+06       | 2.16 | 13.189      | 1.7    | 1.96       | 3.2    | 0.1876     | 2.7    | 0.846       | 1108.3     | 27.9    | 1102       | 21.8    | 1090             | 34.6 -1.7 |         |
| FC 21                        | 977         | 2E+06       | 1.57 | 13.07       | 1.5    | 1.988      | 2.8    | 0.18858    | 2.3    | 0.85        | 1113.7     | 24      | 1111.6     | 18.6    | 1108             | 29 -0.6   |         |
| FC 22                        | 398         | 5E+06       | 1.85 | 13.225      | 2.3    | 1.927      | 3.3    | 0.1849     | 2.3    | 0.709       | 1093.7     | 23.3    | 1090.5     | 21.8    | 1084             | 46 -0.9   |         |
| FC 23                        | 199         | 273305      | 2.04 | 13.171      | 2.9    | 1.923      | 4.6    | 0.18375    | 3.5    | 0.771       | 1087.4     | 35.4    | 1089       | 30.7    | 1092             | 58.6 0.4  |         |
| FC 24                        | 1083        | 1E+06       | 1.3  | 13.054      | 1.9    | 1.971      | 2.8    | 0.18671    | 2.1    | 0.736       | 1103.5     | 21.1    | 1105.7     | 19.1    | 1110             | 38.2 0.6  |         |
| FC 25                        | 429         | 1E+06       | 1.67 | 12.981      | 2.1    | 1.974      | 3.1    | 0.18596    | 2.3    | 0.728       | 1099.5     | 22.9    | 1106.8     | 21      | 1121             | 42.6 1.9  |         |
| FC 27                        | 514         | 422364      | 1.67 | 13.107      | 2.2    | 1.92       | 3.5    | 0.18264    | 2.8    | 0.784       | 1081.4     | 27.4    | 1088.2     | 23.4    | 1102             | 43.5 1.9  |         |
| FC 28                        | 452         | 889929      | 1.89 | 13.125      | 1.9    | 1.985      | 3      | 0.18903    | 2.4    | 0.786       | 1116.1     | 24.4    | 1110.4     | 20.4    | 1099             | 37.4 -1.5 |         |
| FC 29                        | 807         | 4E+06       | 1.19 | 13.136      | 2.3    | 1.998      | 3.5    | 0.1904     | 2.6    | 0.746       | 1123.6     | 27.1    | 1114.7     | 23.8    | 1098             | 46.9 -2.4 |         |
| FC 3                         | 266         | 4E+06       | 1.64 | 13.266      | 2.3    | 1.943      | 3.2    | 0.18699    | 2.2    | 0.7         | 1105       | 22.5    | 1095.9     | 21.2    | 1078             | 45.4 -2.5 |         |
| FC 30                        | 298         | 191514      | 1.76 | 13.116      | 1.9    | 1.926      | 3.2    | 0.18324    | 2.6    | 0.816       | 1084.7     | 26.3    | 1090       | 21.6    | 1101             | 37.3 1.4  |         |
| FC 31                        | 126         | 133579      | 3.18 | 13.205      | 2.3    | 1.939      | 3.7    | 0.18574    | 2.9    | 0.782       | 1098.3     | 29.5    | 1094.5     | 25      | 1087             | 46.6 -1.0 |         |
| FC 32                        | 209         | 2E+06       | 1.82 | 13.216      | 1.7    | 1.916      | 3.5    | 0.18371    | 3.1    | 0.88        | 1087.2     | 30.6    | 1086.6     | 23.2    | 1085             | 33.1 -0.2 |         |
| FC 33                        | 277         | 163465      | 1.76 | 13.191      | 2.2    | 1.92       | 3.3    | 0.18375    | 2.5    | 0.762       | 1087.4     | 25.4    | 1088       | 22.2    | 1089             | 43.1 0.2  |         |
| FC 34                        | 395         | 335965      | 1.9  | 12.997      | 1.6    | 1.916      | 2.7    | 0.18068    | 2.2    | 0.818       | 1070.7     | 22.1    | 1086.6     | 18.3    | 1119             | 31.5 4.3  |         |
| FC 35                        | 270         | 412106      | 1.84 | 13.237      | 2.1    | 1.962      | 3.2    | 0.18846    | 2.4    | 0.75        | 1113       | 24.2    | 1102.6     | 21.2    | 1082             | 41.9 -2.8 |         |
| FC 36                        | 437         | 242304      | 2.48 | 13.114      | 2.1    | 1.958      | 3.5    | 0.18635    | 2.9    | 0.809       | 1101.6     | 29.1    | 1101.3     | 23.8    | 1101             | 41.7 -0.1 |         |
| FC 37                        | 912         | 1E+06       | 1.38 | 13.032      | 1.5    | 1.969      | 3      | 0.18622    | 2.6    | 0.864       | 1100.9     | 26.6    | 1105.1     | 20.5    | 1113             | 30.6 1.1  |         |
| FC 38                        | 232         | 107688      | 2.41 | 13.146      | 2.3    | 1.945      | 3.5    | 0.18553    | 2.7    | 0.761       | 1097.1     | 27.2    | 1096.8     | 23.7    | 1096             | 46 -0.1   |         |
| FC 39                        | 930         | 516430      | 1.64 | 13.1        | 1.6    | 1.961      | 2.4    | 0.18635    | 1.9    | 0.764       | 1101.6     | 18.8    | 1102.1     | 16.3    | 1103             | 31.4 0.1  |         |
| FC 4                         | 236         | 779526      | 1.71 | 13.094      | 1.9    | 1.945      | 3.1    | 0.18482    | 2.5    | 0.785       | 1093.2     | 24.8    | 1096.8     | 21      | 1104             | 38.9 1.0  |         |
| FC 41                        | 309         | 514881      | 3.45 | 13.101      | 2.2    | 1.983      | 3.5    | 0.18848    | 2.6    | 0.76        | 1113.2     | 26.8    | 1109.7     | 23.3    | 1103             | 44.9 -0.9 |         |
| FC 42                        | 392         | 2E+06       | 2.19 | 13.26       | 1.8    | 1.955      | 3      | 0.18805    | 2.4    | 0.794       | 1110.8     | 24.4    | 1100       | 20.2    | 1079             | 36.7 -3.0 |         |
| FC 43                        | 1575        | 1E+07       | 1.26 | 12.808      | 1.9    | 2.037      | 2.6    | 0.18935    | 1.8    | 0.693       | 1117.8     | 18.6    | 1128.1     | 17.9    | 1148             | 37.5 2.6  |         |
| FC 44                        | 402         | 340495      | 1.96 | 13.102      | 2.2    | 1.954      | 3.6    | 0.18578    | 2.9    | 0.804       | 1098.5     | 29.5    | 1099.9     | 24.4    | 1103             | 43.2 0.4  |         |
| FC 45                        | 934         | 536074      | 1.95 | 12.963      | 1.4    | 2.011      | 2.9    | 0.18916    | 2.5    | 0.874       | 1116.8     | 26      | 1119.2     | 19.7    | 1124             | 28.1 0.6  |         |
| FC 46                        | 272         | 167369      | 1.84 | 13.26       | 2.7    | 1.929      | 4.5    | 0.18561    | 3.6    | 0.801       | 1097.6     | 36      | 1091.2     | 29.8    | 1079             | 53.5 -1.8 |         |
| FC 47                        | 174         | 155761      | 1.97 | 13.155      | 2.1    | 1.916      | 3.6    | 0.1829     | 3      | 0.825       | 1082.8     | 30      | 1086.8     | 24.3    | 1095             | 41.3 1.1  |         |
| FC 48                        | 136         | 149085      | 3.18 | 13.224      | 1.9    | 1.932      | 3.6    | 0.18538    | 3.1    | 0           |            |         |            |         |                  |           |         |

|       |     |        |      |        |     |       |     |         |     |       |        |      |        |      |      |      |      |
|-------|-----|--------|------|--------|-----|-------|-----|---------|-----|-------|--------|------|--------|------|------|------|------|
| FC 65 | 819 | 2E+06  | 1.17 | 13.105 | 2   | 1.954 | 3.3 | 0.18581 | 2.6 | 0.799 | 1098.6 | 26.7 | 1099.9 | 22.2 | 1102 | 39.7 | 0.3  |
| FC 66 | 401 | 2E+06  | 2    | 13.198 | 2.1 | 1.939 | 3.4 | 0.18568 | 2.7 | 0.788 | 1097.9 | 26.9 | 1094.6 | 22.6 | 1088 | 41.6 | -0.9 |
| FC 67 | 207 | 243071 | 1.74 | 13.15  | 1.9 | 1.932 | 3.5 | 0.1843  | 3   | 0.847 | 1090.4 | 29.7 | 1092.1 | 23.4 | 1095 | 37.2 | 0.5  |
| FC 68 | 405 | 646144 | 1.78 | 13.156 | 1.8 | 1.96  | 3.2 | 0.18704 | 2.6 | 0.825 | 1105.3 | 26.4 | 1101.7 | 21.2 | 1095 | 35.7 | -1.0 |
| FC 69 | 692 | 2E+07  | 1.41 | 12.99  | 1.9 | 1.964 | 3.4 | 0.18514 | 2.8 | 0.83  | 1095   | 28   | 1103.3 | 22.6 | 1120 | 37.3 | 2.2  |
| FC 7  | 376 | 567971 | 2.11 | 13.164 | 1.7 | 1.925 | 2.5 | 0.18387 | 1.7 | 0.711 | 1088.1 | 17.5 | 1089.8 | 16.4 | 1093 | 34.5 | 0.5  |
| FC 70 | 334 | 172283 | 2.5  | 12.949 | 1.9 | 1.954 | 2.8 | 0.18358 | 2.1 | 0.727 | 1086.5 | 20.6 | 1099.8 | 19.1 | 1126 | 38.9 | 3.5  |
| FC 71 | 724 | 1E+06  | 1.7  | 13.232 | 1.8 | 1.947 | 2.7 | 0.18689 | 2   | 0.747 | 1104.5 | 20.5 | 1097.3 | 18.1 | 1083 | 36   | -2.0 |
| FC 73 | 285 | 189979 | 2.46 | 13.227 | 1.9 | 1.931 | 3.3 | 0.1853  | 2.7 | 0.821 | 1095.8 | 26.9 | 1091.8 | 21.8 | 1084 | 37.2 | -1.1 |
| FC 74 | 262 | 392456 | 2.29 | 13.157 | 1.8 | 1.923 | 3.3 | 0.18361 | 2.8 | 0.835 | 1086.6 | 27.8 | 1089.2 | 22.3 | 1094 | 36.7 | 0.7  |
| FC 75 | 228 | 113229 | 1.6  | 13.232 | 1.7 | 1.947 | 3   | 0.18694 | 2.4 | 0.811 | 1104.8 | 24.3 | 1097.4 | 19.8 | 1083 | 34.6 | -2.0 |
| FC 76 | 129 | 90357  | 2.4  | 13.136 | 2.4 | 1.956 | 4.3 | 0.18644 | 3.5 | 0.828 | 1102.1 | 35.9 | 1100.5 | 28.8 | 1098 | 48.1 | -0.4 |
| FC 77 | 368 | 361980 | 2.06 | 12.978 | 1.8 | 1.957 | 3.1 | 0.18426 | 2.5 | 0.815 | 1090.2 | 25.4 | 1100.8 | 20.9 | 1122 | 35.9 | 2.8  |
| FC 78 | 901 | 349784 | 1.56 | 13.171 | 1.9 | 1.971 | 3   | 0.1884  | 2.3 | 0.766 | 1112.7 | 23.6 | 1105.8 | 20.3 | 1092 | 38.7 | -1.9 |
| FC 79 | 105 | 122095 | 3.37 | 13.022 | 1.9 | 1.934 | 3.5 | 0.18274 | 2.9 | 0.832 | 1081.9 | 28.8 | 1092.9 | 23.3 | 1115 | 38.5 | 3.0  |
| FC 8  | 473 | 616773 | 1.8  | 13.173 | 2.7 | 1.963 | 3.7 | 0.18763 | 2.6 | 0.683 | 1108.5 | 26   | 1102.9 | 25.2 | 1092 | 54.8 | -1.5 |
| FC 80 | 88  | 45070  | 2.43 | 13.457 | 2.6 | 1.896 | 3.6 | 0.18517 | 2.6 | 0.71  | 1095.1 | 26   | 1079.8 | 24.2 | 1049 | 51.7 | -4.4 |
| FC 81 | 671 | 639311 | 1.89 | 13.188 | 1.8 | 1.972 | 2.9 | 0.18866 | 2.3 | 0.797 | 1114.1 | 23.9 | 1105.8 | 19.8 | 1090 | 35.5 | -2.2 |
| FC 82 | 200 | 97569  | 1.75 | 13.217 | 2.1 | 1.936 | 3.2 | 0.18562 | 2.4 | 0.743 | 1097.6 | 23.8 | 1093.5 | 21.2 | 1085 | 42.5 | -1.1 |
| FC 84 | 160 | 1E+06  | 2.64 | 13.228 | 2.2 | 1.923 | 3.7 | 0.18453 | 3   | 0.808 | 1091.7 | 29.7 | 1088.9 | 24.5 | 1084 | 43.2 | -0.8 |
| FC 86 | 352 | 946270 | 2.14 | 13.054 | 1.8 | 1.944 | 2.9 | 0.18409 | 2.2 | 0.771 | 1089.3 | 22.4 | 1096.2 | 19.4 | 1110 | 36.8 | 1.9  |
| FC 87 | 303 | 880293 | 2.36 | 13.172 | 2.2 | 1.928 | 3.5 | 0.18428 | 2.7 | 0.78  | 1090.3 | 27.1 | 1090.9 | 23.2 | 1092 | 43.4 | 0.2  |
| FC 9  | 538 | 444911 | 1.56 | 13.099 | 3   | 2.001 | 3.7 | 0.19021 | 2.2 | 0.583 | 1122.5 | 22.4 | 1116   | 25.2 | 1103 | 60.6 | -1.7 |

| Zircon #     | Composition |             |      |             |        |            |        |            |        |             | Ages       |         |            |         |                  |      |      | % Disc. |
|--------------|-------------|-------------|------|-------------|--------|------------|--------|------------|--------|-------------|------------|---------|------------|---------|------------------|------|------|---------|
|              | U (ppm)     | 206Pb/204Pb | U/Th | 206Pb/207Pb | 2σ (%) | 207Pb/235U | 2σ (%) | 206Pb/238U | 2σ (%) | Error Corr. | 206Pb/238U | 2σ (Ma) | 207Pb/235U | 2σ (Ma) | 206Pb/207Pb (Ma) |      |      |         |
| FC1 CA Run 1 |             |             |      |             |        |            |        |            |        |             |            |         |            |         |                  |      |      |         |
| FC1-2        | 317         | 9427        | 2.03 | 13.176      | 2.1    | 1.965      | 3.6    | 0.18789    | 2.9    | 0.813       | 1109.9     | 29.7    | 1103.7     | 24.1    | ####             | 41.7 | -1.7 |         |
| FC1-3        | 255         | 17295       | 1.91 | 13.296      | 2.3    | 1.819      | 5.3    | 0.17550    | 4.8    | 0.898       | 1042.3     | 45.9    | 1052.4     | 34.8    | ####             | 47.0 | 2.9  |         |
| FC1-4        | 342         | 17632       | 1.95 | 13.123      | 2.2    | 1.986      | 3.9    | 0.18911    | 3.2    | 0.820       | 1116.6     | 32.9    | 1110.8     | 26.4    | ####             | 44.8 | -1.5 |         |
| FC1-9        | 247         | 5489        | 1.73 | 13.526      | 2.2    | 1.899      | 3.1    | 0.18638    | 2.2    | 0.711       | 1101.8     | 22.6    | 1080.8     | 20.8    | ####             | 44.5 | -6.1 |         |
| FC1-28       | 594         | 37041       | 1.87 | 13.058      | 1.5    | 1.952      | 2.8    | 0.18495    | 2.4    | 0.857       | 1094.0     | 24.5    | 1099.2     | 19.1    | ####             | 29.3 | 1.4  |         |
| FC1-29       | 716         | 568400      | 1.92 | 12.971      | 1.8    | 1.942      | 3.5    | 0.18280    | 3.0    | 0.859       | 1082.3     | 29.8    | 1095.8     | 23.4    | ####             | 35.6 | 3.6  |         |
| FC1-5        | 250         | 26456       | 1.51 | 13.085      | 2.2    | 1.919      | 3.9    | 0.18222    | 3.1    | 0.815       | 1079.1     | 31.3    | 1087.8     | 25.8    | ####             | 44.8 | 2.4  |         |
| FC1-10       | 425         | 34164       | 1.63 | 12.987      | 2.0    | 1.926      | 4.3    | 0.18148    | 3.8    | 0.886       | 1075.1     | 37.9    | 1090.1     | 28.9    | ####             | 40.0 | 4.0  |         |
| FC1-11       | 285         | 262810      | 2.04 | 12.981      | 2.0    | 1.995      | 3.5    | 0.18791    | 2.8    | 0.818       | 1110.1     | 28.9    | 1113.8     | 23.4    | ####             | 39.8 | 1.0  |         |
| FC1-6        | 731         | 111205      | 1.96 | 13.074      | 1.7    | 1.931      | 4.1    | 0.18315    | 3.7    | 0.913       | 1084.1     | 37.4    | 1091.8     | 27.4    | ####             | 33.5 | 2.1  |         |
| FC1-12       | 335         | 19230       | 1.90 | 13.338      | 2.2    | 1.891      | 3.8    | 0.18297    | 3.1    | 0.824       | 1083.2     | 31.2    | 1077.8     | 25.2    | ####             | 43.2 | -1.5 |         |
| FC1-13       | 282         | 14075       | 2.07 | 13.137      | 2.5    | 1.974      | 4.5    | 0.18820    | 3.8    | 0.836       | 1111.6     | 38.6    | 1106.8     | 30.5    | ####             | 49.7 | -1.3 |         |
| FC1-26       | 497         | 37389       | 1.88 | 13.122      | 1.7    | 1.854      | 3.1    | 0.17656    | 2.6    | 0.830       | 1048.2     | 25.2    | 1065.0     | 20.7    | ####             | 35.0 | 4.7  |         |
| FC1-14       | 713         | 47581       | 1.86 | 13.169      | 1.7    | 1.932      | 3.6    | 0.18457    | 3.1    | 0.885       | 1091.9     | 31.6    | 1092.1     | 23.8    | ####             | 33.1 | 0.1  |         |
| FC1-20       | 216         | 312662      | 1.57 | 13.232      | 1.5    | 1.929      | 3.1    | 0.18525    | 2.6    | 0.863       | 1095.6     | 26.6    | 1091.4     | 20.4    | ####             | 30.9 | -1.2 |         |
| FC1-27       | 267         | 195211      | 1.82 | 13.129      | 1.6    | 1.951      | 3.3    | 0.18583    | 2.9    | 0.881       | 1098.7     | 29.3    | 1098.7     | 22.1    | ####             | 31.1 | 0.0  |         |
| FC1-17       | 661         | 40918       | 1.85 | 13.197      | 1.9    | 1.948      | 3.3    | 0.18651    | 2.7    | 0.819       | 1102.4     | 27.5    | 1097.7     | 22.2    | ####             | 38.1 | -1.3 |         |
| FC1-25       | 174         | 375208      | 1.57 | 12.996      | 2.0    | 1.904      | 4.2    | 0.17954    | 3.7    | 0.877       | 1064.4     | 36.3    | 1082.5     | 28.1    | ####             | 40.5 | 4.9  |         |
| FC1-19       | 225         | 122465      | 1.60 | 13.099      | 1.4    | 1.893      | 4.4    | 0.17995    | 4.2    | 0.946       | 1066.7     | 41.0    | 1078.7     | 29.3    | ####             | 28.5 | 3.3  |         |
| FC1-15       | 223         | 36059       | 1.79 | 13.254      | 1.5    | 1.893      | 2.8    | 0.18203    | 2.4    | 0.852       | 1078.1     | 23.9    | 1078.6     | 18.7    | ####             | 29.6 | 0.1  |         |
| FC1-16       | 223         | 8242        | 1.99 | 13.462      | 1.8    | 1.897      | 3.2    | 0.18531    | 2.6    | 0.821       | 1095.9     | 26.2    | 1080.1     | 21.1    | ####             | 36.6 | -4.5 |         |
| FC1-30       | 229         | 44061       | 1.78 | 13.067      | 2.0    | 1.960      | 3.2    | 0.18581    | 2.5    | 0.788       | 1098.7     | 25.6    | 1101.8     | 21.6    | ####             | 39.5 | 0.9  |         |
| FC1-24       | 264         | 21854       | 2.31 | 13.238      | 2.1    | 1.944      | 4.4    | 0.18669    | 3.8    | 0.871       | 1103.4     | 38.5    | 1096.3     | 29.3    | ####             | 43.0 | -2.0 |         |
| FC1-18       | 206         | 29117       | 1.68 | 13.036      | 2.2    | 1.932      | 3.7    | 0.18278    | 3.0    | 0.800       | 1082.2     | 29.7    | 1092.4     | 25.0    | ####             | 44.8 | 2.8  |         |
| FC1-21       | 673         | 137397      | 1.82 | 13.129      | 1.4    | 1.965      | 2.9    | 0.18718    | 2.6    | 0.885       | 1106.1     | 26.3    | 1103.5     | 19.6    | ####             | 27.2 | -0.7 |         |
| FC1-22       | 302         | 38717       | 2.16 | 13.108      | 1.6    | 1.942      | 3.5    | 0.18473    | 3.1    | 0.893       | 1092.8     | 31.5    | 1095.8     | 23.5    | ####             | 31.6 | 0.8  |         |
| FC1-23       | 169         | 6382        | 1.58 | 13.515      | 2.9    | 1.852      | 4.1    | 0.18166    | 2.9    | 0.701       | 1076.0     | 28.3    | 1064.3     | 26.9    | ####             | 58.7 | -3.4 |         |
| FC           | 296         | 15432       | 1.36 | 13.356      | 2.0    | 1.959      | 2.8    | 0.18980    | 1.9    | 0.703       | 1120.3     | 19.9    | 1101.4     | 18.5    | ####             | 39.3 | -5.3 |         |
| FC1-8        | 720         | 99262       | 1.83 | 13.040      | 1.9    | 1.945      | 3.4    | 0.18400    | 2.8    | 0.826       | 1088.8     | 28.1    | 1096.6     | 22.8    | ####             | 38.1 | 2.1  |         |
| FC1 CA Run 2 |             |             |      |             |        |            |        |            |        |             |            |         |            |         |                  |      |      |         |
| FC 1         | 197         | 55877       | 1.57 | 13.116      | 1.9    | 1.934      | 3.9    | 0.18405    | 3.4    | 0.874       | 1089.1     | 34      | 1092.9     | 25.9    | 1101             | 37.6 | 1.0  |         |
| FC 10        | 282         | 465080      | 1.36 | 13.058      | 1.7    | 1.952      | 3      | 0.18499    | 2.5    | 0.826       | 1094.2     | 25.1    | 1099.3     | 20.3    | 1109             | 34   | 1.4  |         |
| FC 11        | 749         | 427292      | 1.61 | 13.064      | 1.5    | 1.976      | 2.4    | 0.1873     | 1.8    | 0.758       | 1106.7     | 18.1    | 1107.3     | 15.9    | 1108             | 30.6 | 0.2  |         |
| FC 12        | 334         | 191670      | 1.76 | 13.142      | 2.7    | 1.939      | 3.6    | 0.18492    | 2.4    | 0.674       | 1093.8     | 24.3    | 1094.7     | 24.1    | 1097             | 53.1 | 0.2  |         |
| FC 13        | 295         | 166045      | 2.05 | 13.244      | 2      | 1.917      | 3      | 0.18425    | 2.3    | 0.762       | 1090.1     | 23.1    | 1087.1     | 20.2    | 1081             | 39.4 | -0.8 |         |
| FC 14        | 255         | 154834      | 1.69 | 13.152      | 1.8    | 1.904      | 3.3    | 0.18171    | 2.7    | 0.843       | 1076.3     | 27.2    | 1082.5     | 21.7    | 1095             | 35.1 | 1.7  |         |
| FC 15        | 179         | 310181      | 1.59 | 13.394      | 2.1    | 1.922      | 3.5    | 0.18677    | 2.8    | 0.8         | 1103.8     | 28.1    | 1088.7     | 23.1    | 1059             | 41.8 | -4.3 |         |
| FC 16        | 264         | 163699      | 1.5  | 13.286      | 2.3    | 1.941      | 3.7    | 0.18711    | 2.9    | 0.788       | 1105.7     | 29.5    | 1095.3     | 24.6    | 1075             | 45.4 | -2.9 |         |
| FC 17        | 357         | 289942      | 1.86 | 13.11       | 2.3    | 1.94       | 3.4    | 0.18452    | 2.5    | 0.741       | 1091.6     | 25.2    | 1094.9     | 22.6    | 1102             | 45.4 | 0.9  |         |
| FC 18        | 767         | 304097      | 1.81 | 13.138      | 1.6    | 1.975      | 3      | 0.18827    | 2.5    | 0.838       | 1112       | 25.5    | 1107       | 20      | 1097             | 32.5 | -1.3 |         |
| FC 19        | 256         | 91584       | 1.48 | 13.169      | 2.5    | 1.948      | 3.5    | 0.18611    | 2.5    | 0.705       | 1100.3     | 25.3    | 1097.7     | 23.8    | 1093             | 50.3 | -0.7 |         |
| FC 2         | 108         | 493698      | 2.24 | 13.282      | 2.5    | 1.933      | 3.9    | 0.18628    | 2.9    | 0.758       | 1101.2     | 29.8    | 1092.6     | 26      | 1075             | 50.8 | -2.4 |         |
| FC 20        | 756         | 366256      | 1.75 | 13.14       | 1.4    | 1.981      | 2.6    | 0.1889     | 2.1    | 0.836       | 1115.4     | 21.9    | 1109.2     | 17.3    | 1097             | 28   | -1.7 |         |
| FC 21        | 432         | 467167      | 1.38 | 13.056      | 1.9    | 1.965      | 3.1    | 0.1861     | 2.5    | 0.793       | 1100.2     | 25      | 1103.4     | 21      | 1110             | 38.1 | 0.9  |         |
| FC 22        | 723         | 263972      | 1.56 | 13.16       | 2.1    | 1.98       | 3.4    | 0.18904    | 2.7    | 0.795       | 1116.2     | 28      | 1108.6     | 23.2    | 1094             | 41.7 | -2.0 |         |
| FC 23        | 293         | 259893      | 1.66 | 13.201      | 2      | 1.933      | 3.3    | 0.18518    | 2.6    | 0.783       | 1095.2     | 25.8    | 1092.7     | 21.9    | 1088             | 40.7 | -0.7 |         |
| FC 24        | 172         | 250468      | 1.51 | 13.233      | 2.2    | 1.907      | 3.5    | 0.18306    | 2.8    | 0.775       | 1083.7     | 27.4    | 1083.4     | 23.6    | 1083             | 45   | -0.1 |         |
| FC 25        | 236         | 414658      | 1.61 | 13.101      | 1.9    | 1.948      | 2.9    | 0.18514    | 2.2    | 0.747       | 1095       | 22      | 1097.6     | 19.6    | 1103             | 39   | 0.7  |         |
| FC 26        | 506         | 169425      | 1.51 | 13.143      | 1.7    | 1.925      | 5.6    | 0.18356    | 5.4    | 0.954       | 1086.4     | 53.9    | 1089.8     | 37.7    | 1096             | 33.8 | 0.8  |         |
| FC 27        | 780         | 851547      | 1.8  | 13.108      | 2.3    | 1.942      | 3.4    | 0.18473    | 2.5    | 0.738       | 1092.8     | 25      | 1095.8     | 22.6    | 1102             | 45.5 | 0.9  |         |
| FC 28        | 651         | 675493      | 1.81 | 13.077      | 1.5    | 1.961      | 2.7    | 0.1861     | 2.2    | 0.82        | 1100.2     | 22.3    | 1102.3     | 18.1    | 1107             | 30.7 | 0.6  |         |
| FC 29        | 759         | 381713      | 1.83 | 13.231      | 1.3    | 1.951      | 2.6    | 0.18734    | 2.3    | 0.866       | 1107       | 23.2    | 1098.9     | 17.7    | 1083             | 26.4 | -2.2 |         |
| FC 3         | 422         | 395195      | 1.99 | 13.01       | 2.1    | 1.946      | 3      | 0.1837     | 2.1    | 0.698       | 1087.1     | 20.9    | 1097.1     | 20.1    | 1117             | 42.9 | 2.7  |         |
| FC 30        | 220         | 517898      | 1.6  | 13.117      | 1.7    | 1.979      | 3      | 0.18833    | 2.5    | 0.832       | 1112.3     | 25.4    | 1108.3     | 20.2    | 1100             | 33.2 | -1.1 |         |
| FC 31        | 138         | 45894       | 1.66 | 13.369      | 2.2    | 1.884      | 3.8    | 0.18273    | 3.1    | 0.81        | 1081.8     | 30.7    | 1075.4     | 25.3    | 1062             | 45   | -1.8 |         |
| FC 32        | 475         | 141836      | 1.5  | 13.069      | 1.7    | 1.951      | 2.7    | 0.18503    | 2.1    | 0.783       | 1094.4     | 21.1    | 1098.9     | 18      | 1108             | 33.2 | 1.1  |         |

|       |     |        |      |        |     |       |     |         |     |       |        |      |        |      |      |      |      |
|-------|-----|--------|------|--------|-----|-------|-----|---------|-----|-------|--------|------|--------|------|------|------|------|
| FC 33 | 225 | 116039 | 1.73 | 13.329 | 1.8 | 1.933 | 3.2 | 0.18694 | 2.6 | 0.829 | 1104.8 | 26.8 | 1092.5 | 21.3 | 1068 | 35.8 | -3.4 |
| FC 34 | 128 | 170635 | 2.02 | 13.137 | 2.4 | 1.984 | 4   | 0.18908 | 3.3 | 0.81  | 1116.4 | 33.5 | 1109.9 | 27.2 | 1097 | 47.4 | -1.7 |
| FC 35 | 337 | 171209 | 1.78 | 13.253 | 1.6 | 1.944 | 3   | 0.1869  | 2.6 | 0.857 | 1104.5 | 26.4 | 1096.2 | 20.3 | 1080 | 31.3 | -2.3 |
| FC 36 | 234 | 8E+06  | 1.61 | 13.06  | 1.8 | 1.951 | 2.7 | 0.18487 | 2.1 | 0.77  | 1093.5 | 21.3 | 1098.7 | 18.4 | 1109 | 35   | 1.4  |
| FC 37 | 499 | 1E+06  | 1.64 | 13.127 | 2   | 1.949 | 3   | 0.18563 | 2.3 | 0.757 | 1097.7 | 23.2 | 1098.1 | 20.4 | 1099 | 39.7 | 0.1  |
| FC 38 | 115 | 326763 | 1.6  | 13.266 | 2.1 | 1.958 | 3.9 | 0.18848 | 3.2 | 0.833 | 1113.1 | 32.9 | 1101.2 | 25.9 | 1078 | 42.7 | -3.3 |
| FC 39 | 290 | 128002 | 1.73 | 13.122 | 1.9 | 1.922 | 3.3 | 0.183   | 2.7 | 0.821 | 1083.3 | 27.3 | 1088.7 | 22.3 | 1100 | 38.1 | 1.5  |
| FC 4  | 222 | 54039  | 1.65 | 13.224 | 2.5 | 1.906 | 3.6 | 0.18291 | 2.6 | 0.708 | 1082.8 | 25.5 | 1083.3 | 24   | 1084 | 51   | 0.1  |
| FC 40 | 808 | 447456 | 1.85 | 13.078 | 1.9 | 1.945 | 3.1 | 0.18457 | 2.5 | 0.793 | 1091.9 | 25   | 1096.7 | 21.1 | 1106 | 38.3 | 1.3  |
| FC 41 | 272 | 168755 | 1.65 | 13.001 | 1.6 | 1.956 | 3.4 | 0.18447 | 3   | 0.879 | 1091.4 | 30.2 | 1100.4 | 23   | 1118 | 32.6 | 2.4  |
| FC 42 | 758 | 1E+06  | 1.76 | 13.086 | 1.6 | 2.011 | 2.7 | 0.1909  | 2.2 | 0.809 | 1126.2 | 22.6 | 1119.1 | 18.3 | 1105 | 31.8 | -1.9 |
| FC 43 | 339 | 331325 | 1.68 | 13.109 | 1.9 | 1.985 | 3.1 | 0.18883 | 2.4 | 0.795 | 1115   | 24.9 | 1110.5 | 20.7 | 1102 | 37.1 | -1.2 |
| FC 44 | 252 | 130231 | 1.75 | 12.982 | 2   | 1.966 | 3.1 | 0.18521 | 2.4 | 0.776 | 1095.4 | 24.6 | 1104   | 21.2 | 1121 | 39.6 | 2.3  |
| FC 45 | 294 | 453473 | 1.83 | 13.099 | 2.1 | 1.944 | 3.3 | 0.18479 | 2.6 | 0.777 | 1093.1 | 26   | 1096.5 | 22.3 | 1103 | 41.8 | 0.9  |
| FC 46 | 372 | 107725 | 1.86 | 13.201 | 2.1 | 1.988 | 3.1 | 0.19039 | 2.3 | 0.75  | 1123.5 | 24.1 | 1111.3 | 21   | 1088 | 41.3 | -3.3 |
| FC 47 | 468 | 317162 | 1.42 | 13.128 | 1.9 | 1.937 | 2.9 | 0.18451 | 2.2 | 0.756 | 1091.5 | 22   | 1094   | 19.4 | 1099 | 37.9 | 0.7  |
| FC 48 | 314 | 1E+07  | 1.79 | 13.152 | 2.1 | 1.956 | 3.4 | 0.18666 | 2.7 | 0.784 | 1103.2 | 27.2 | 1100.5 | 23   | 1095 | 42.5 | -0.7 |
| FC 49 | 329 | 71189  | 1.49 | 13.226 | 2.3 | 1.904 | 3.3 | 0.18274 | 2.4 | 0.724 | 1081.9 | 23.8 | 1082.5 | 22   | 1084 | 45.6 | 0.2  |
| FC 5  | 772 | 455068 | 1.83 | 13.091 | 1.8 | 1.962 | 3.1 | 0.18638 | 2.5 | 0.821 | 1101.8 | 25.6 | 1102.6 | 20.7 | 1104 | 35.2 | 0.2  |
| FC 50 | 260 | 3E+06  | 1.64 | 13.063 | 2.2 | 1.956 | 3.7 | 0.18541 | 3   | 0.814 | 1096.4 | 30.6 | 1100.5 | 25   | 1109 | 43.2 | 1.1  |
| FC 51 | 260 | 399458 | 1.7  | 13.152 | 1.9 | 1.953 | 3   | 0.1864  | 2.4 | 0.783 | 1101.8 | 24.1 | 1099.6 | 20.5 | 1095 | 37.9 | -0.6 |
| FC 52 | 312 | 158650 | 2.37 | 13.284 | 1.2 | 1.94  | 2.1 | 0.187   | 1.7 | 0.814 | 1105.1 | 17.6 | 1095   | 14.3 | 1075 | 24.8 | -2.8 |
| FC 53 | 324 | 356875 | 1.45 | 13.128 | 2.6 | 1.936 | 4   | 0.18444 | 3.1 | 0.773 | 1091.2 | 31.2 | 1093.7 | 26.9 | 1099 | 51   | 0.7  |
| FC 54 | 750 | 485524 | 1.84 | 13.033 | 1.9 | 1.951 | 2.6 | 0.18447 | 1.9 | 0.711 | 1091.3 | 18.9 | 1098.7 | 17.8 | 1113 | 37.2 | 2.0  |
| FC 55 | 947 | 351209 | 1.8  | 13.043 | 1.8 | 1.949 | 2.7 | 0.18444 | 2.1 | 0.758 | 1091.2 | 20.9 | 1098.1 | 18.4 | 1112 | 35.7 | 1.8  |
| FC 56 | 204 | 56152  | 1.51 | 13.212 | 2.2 | 1.928 | 3.7 | 0.18485 | 3   | 0.812 | 1093.4 | 30.1 | 1090.9 | 24.7 | 1086 | 43.2 | -0.7 |
| FC 57 | 332 | 1E+06  | 1.83 | 13.175 | 2.2 | 1.956 | 3   | 0.18693 | 2.1 | 0.68  | 1104.7 | 21   | 1100.3 | 20.4 | 1092 | 44.7 | -1.2 |
| FC 58 | 466 | 186365 | 1.54 | 13.07  | 1.9 | 1.94  | 3.3 | 0.18398 | 2.7 | 0.814 | 1088.7 | 26.6 | 1095   | 21.9 | 1108 | 37.9 | 1.7  |
| FC 59 | 270 | 127490 | 1.47 | 13.171 | 2.2 | 1.954 | 3.7 | 0.18668 | 3   | 0.802 | 1103.4 | 30.1 | 1099.6 | 24.8 | 1092 | 44.2 | -1.0 |
| FC 6  | 411 | 232236 | 1.4  | 13.006 | 2   | 1.964 | 3.4 | 0.18531 | 2.8 | 0.809 | 1095.9 | 27.8 | 1103.1 | 23   | 1117 | 40   | 1.9  |
| FC 60 | 284 | 956919 | 1.71 | 13.32  | 2   | 1.938 | 3.6 | 0.18732 | 3   | 0.839 | 1106.8 | 30.7 | 1094.4 | 24.1 | 1070 | 39.2 | -3.5 |
| FC 61 | 240 | 151844 | 1.63 | 13.194 | 2.1 | 1.976 | 3.6 | 0.18919 | 2.8 | 0.799 | 1117   | 29.1 | 1107.4 | 23.9 | 1089 | 42.7 | -2.6 |
| FC 62 | 267 | 150389 | 2.06 | 13.229 | 2.1 | 1.946 | 3.1 | 0.18681 | 2.3 | 0.74  | 1104.1 | 23   | 1097.1 | 20.6 | 1083 | 41.4 | -1.9 |
| FC 63 | 243 | 425564 | 1.56 | 13.124 | 1.8 | 1.937 | 3.6 | 0.18442 | 3.1 | 0.859 | 1091.1 | 30.7 | 1093.8 | 23.8 | 1099 | 36.4 | 0.8  |
| FC 64 | 241 | 330703 | 1.72 | 13.207 | 2.1 | 1.948 | 3.6 | 0.1867  | 3   | 0.817 | 1103.5 | 30.1 | 1097.8 | 24.3 | 1087 | 41.9 | -1.5 |
| FC 65 | 168 | 250124 | 1.57 | 13.285 | 2.4 | 1.918 | 3.8 | 0.18487 | 3   | 0.784 | 1093.5 | 29.9 | 1087.4 | 25.3 | 1075 | 47.3 | -1.7 |
| FC 66 | 192 | 97607  | 1.61 | 13.106 | 2.2 | 1.936 | 3.6 | 0.18409 | 2.8 | 0.791 | 1089.3 | 28.3 | 1093.6 | 23.9 | 1102 | 43.6 | 1.2  |
| FC 67 | 804 | 522897 | 1.77 | 13.019 | 1.6 | 1.993 | 2.8 | 0.18825 | 2.3 | 0.82  | 1111.9 | 23.1 | 1113.1 | 18.6 | 1116 | 31.4 | 0.3  |
| FC 68 | 361 | 119554 | 1.84 | 13.259 | 1.6 | 1.929 | 2.9 | 0.18558 | 2.4 | 0.829 | 1097.4 | 24.1 | 1091.2 | 19.3 | 1079 | 32.3 | -1.7 |
| FC 69 | 789 | 364736 | 1.81 | 13.184 | 1.6 | 1.92  | 2.6 | 0.18369 | 2   | 0.788 | 1087.1 | 20.4 | 1088.1 | 17.3 | 1090 | 31.9 | 0.3  |
| FC 7  | 287 | 148244 | 1.89 | 13.15  | 2.3 | 1.919 | 3.4 | 0.1831  | 2.6 | 0.752 | 1083.9 | 25.7 | 1087.7 | 22.9 | 1095 | 45.3 | 1.0  |
| FC 70 | 291 | 57276  | 2.39 | 13.234 | 1.9 | 1.961 | 3   | 0.1883  | 2.3 | 0.774 | 1112.1 | 23.7 | 1102.2 | 20.2 | 1083 | 38.1 | -2.7 |
| FC 71 | 780 | 912748 | 1.78 | 13.147 | 2.1 | 1.984 | 3.2 | 0.18924 | 2.4 | 0.759 | 1117.2 | 25   | 1110   | 21.6 | 1096 | 41.7 | -1.9 |
| FC 72 | 438 | 215120 | 1.9  | 12.995 | 1.8 | 1.935 | 3   | 0.18248 | 2.3 | 0.791 | 1080.5 | 23.3 | 1093.4 | 19.8 | 1119 | 36.1 | 3.4  |
| FC 73 | 911 | 2E+06  | 1.82 | 13.015 | 1.6 | 1.96  | 2.5 | 0.18512 | 2   | 0.783 | 1094.9 | 19.8 | 1101.9 | 16.9 | 1116 | 31.2 | 1.9  |
| FC 74 | 371 | 111715 | 1.86 | 13.232 | 2.9 | 1.924 | 4.3 | 0.18471 | 3.1 | 0.735 | 1092.6 | 31.5 | 1089.4 | 28.5 | 1083 | 58   | -0.9 |
| FC 75 | 243 | 278333 | 1.79 | 13.206 | 1.7 | 1.926 | 3.2 | 0.18457 | 2.7 | 0.851 | 1091.9 | 27.5 | 1090.2 | 21.5 | 1087 | 33.9 | -0.5 |
| FC 76 | 234 | 235659 | 1.89 | 13.15  | 2.4 | 1.931 | 3.4 | 0.18426 | 2.4 | 0.711 | 1090.2 | 24.5 | 1091.9 | 22.9 | 1095 | 48.2 | 0.5  |
| FC 77 | 411 | 263048 | 1.82 | 13.121 | 1.6 | 1.957 | 2.8 | 0.18631 | 2.3 | 0.819 | 1101.4 | 22.9 | 1100.9 | 18.6 | 1100 | 31.8 | -0.1 |
| FC 78 | 732 | 377848 | 1.52 | 13.082 | 1.6 | 1.969 | 2.5 | 0.18686 | 1.9 | 0.758 | 1104.3 | 19.2 | 1104.8 | 16.8 | 1106 | 32.6 | 0.1  |
| FC 79 | 419 | 318598 | 1.88 | 13.216 | 2.2 | 1.939 | 3.3 | 0.18589 | 2.4 | 0.74  | 1099.1 | 24.5 | 1094.5 | 21.9 | 1085 | 44.1 | -1.3 |
| FC 8  | 357 | 331933 | 2.09 | 13.193 | 1.7 | 1.926 | 3.2 | 0.18434 | 2.7 | 0.841 | 1090.6 | 27.1 | 1090   | 21.5 | 1089 | 34.8 | -0.2 |
| FC 80 | 763 | 312899 | 1.84 | 13.024 | 1.7 | 1.949 | 2.9 | 0.18423 | 2.4 | 0.812 | 1090   | 23.6 | 1098.2 | 19.4 | 1115 | 33.7 | 2.2  |
| FC 81 | 493 | 339839 | 1.49 | 13.062 | 1.6 | 1.964 | 2.9 | 0.1861  | 2.4 | 0.825 | 1100.2 | 24   | 1103.1 | 19.4 | 1109 | 32.4 | 0.8  |
| FC 82 | 259 | 74277  | 1.75 | 13.223 | 2.2 | 1.918 | 3.1 | 0.18398 | 2.1 | 0.702 | 1088.7 | 21.5 | 1087.2 | 20.4 | 1084 | 43.6 | -0.4 |
| FC 83 | 953 | 9E+06  | 1.8  | 13.1   | 2.1 | 1.951 | 2.9 | 0.18541 | 2   | 0.694 | 1096.5 | 20.5 | 1098.7 | 19.7 | 1103 | 42.2 | 0.6  |
| FC 84 | 215 | 7E+06  | 1.71 | 13.15  | 2.5 | 1.942 | 3.4 | 0.18533 | 2.3 | 0.686 | 1096   | 23.5 | 1095.8 | 22.8 | 1095 | 49.4 | -0.1 |
| FC 85 | 650 | 301211 | 1.84 | 13.089 | 1.3 | 1.961 | 2.3 | 0.1862  | 1.8 | 0.813 | 1100.8 | 18.6 | 1102.1 | 15.2 | 1105 | 26.4 | 0.3  |
| FC 86 | 276 | 466426 | 1.7  | 13.037 | 2.6 | 1.943 | 3.9 | 0.18376 | 2.9 | 0.741 | 1087.5 | 29   | 1095.9 | 26.2 | 1113 | 52.3 | 2.2  |
| FC 87 | 341 | 152118 | 1.72 | 13.309 | 1.8 | 1.944 | 3.2 | 0.1877  | 2.7 | 0.835 | 1108.9 | 27.2 | 1096.3 | 21.5 | 1071 | 35.4 | -3.5 |
| FC 9  | 775 | 205648 | 1.83 | 13.159 | 1.2 | 1.957 | 2.4 | 0.18689 | 2.1 | 0.857 | 1104.5 | 20.8 | 1100.9 | 16.1 | 1094 | 24.7 | -1.0 |
