# Supplementary material for: Increased accuracy and precision in igneous and detrital zircon geochronology using CA-LA-ICPMS
Source: Copernicus journal article supplement (doi:10.5194/gchron-2023-20), 2023-08-25
Supplement: Supplementary file 15 [file gchron-2023-20-supplement.zip]

**TABLE S13: OG1 LA-ICPMS U-Pb ZIRCON GEOCHRONOLOGY**

| Zircon #               | Composition   |             |      |            |        | Ages       |        |            |        |             |                 |         |                 |         |                 |         |         |
|------------------------|---------------|-------------|------|------------|--------|------------|--------|------------|--------|-------------|-----------------|---------|-----------------|---------|-----------------|---------|---------|
|                        | U (ppm 204Pb) | 206Pb/207Pb | U/Th | 206Pb/235U | 2σ (%) | 207Pb/235U | 2σ (%) | 206Pb/238U | 2σ (%) | Error Corr. | 206Pb/238U (Ma) | 2σ (Ma) | 207Pb/235U (Ma) | 2σ (Ma) | 206Pb/238U (Ma) | 2σ (Ma) | % Disc. |
| <b>OG1 no CA Run 1</b> |               |             |      |            |        |            |        |            |        |             |                 |         |                 |         |                 |         |         |
| OG-1-1                 | 74            | 31041       | 1.60 | 3.371      | 1.3    | 29.9557    | 2.8    | 0.73268    | 2.5    | 0.892       | 3543.4          | 68.7    | 3485.4          | 27.8    | 3452.2          | 19.8    | -2.6    |
| OG-1-2                 | 168           | 36470       | 1.66 | 3.287      | 1.6    | 29.6563    | 3.0    | 0.70724    | 2.6    | 0.843       | 3448.0          | 68.4    | 3475.5          | 29.9    | 3491.3          | 25.3    | 1.2     |
| OG-1-3                 | 165           | 389311      | 0.99 | 3.331      | 1.3    | 29.3484    | 3.0    | 0.70940    | 2.6    | 0.892       | 3456.2          | 70.5    | 3465.2          | 29.0    | 3470.5          | 20.6    | 0.4     |
| OG-1-4                 | 162           | 40292       | 1.60 | 3.373      | 1.6    | 29.5789    | 3.1    | 0.72391    | 2.7    | 0.850       | 3510.7          | 71.9    | 3472.9          | 30.7    | 3451.2          | 25.5    | -1.7    |
| OG-1-5                 | 125           | 81494       | 1.21 | 3.345      | 1.2    | 29.0931    | 2.9    | 0.70611    | 2.7    | 0.908       | 3443.8          | 71.0    | 3456.7          | 28.8    | 3464.1          | 19.0    | 0.6     |
| OG-1-6                 | 105           | 38584       | 1.13 | 3.331      | 1.6    | 30.5919    | 3.0    | 0.73928    | 2.5    | 0.846       | 3567.9          | 68.4    | 3506.0          | 29.0    | 3470.8          | 24.3    | -2.8    |
| OG-1-7                 | 108           | 56194       | 1.12 | 3.320      | 1.7    | 29.1868    | 3.1    | 0.70315    | 2.6    | 0.843       | 3432.6          | 69.6    | 3459.8          | 30.5    | 3475.6          | 25.9    | 1.2     |
| OG-1-8                 | 148           | 46190       | 2.12 | 3.360      | 1.8    | 29.1605    | 3.5    | 0.71084    | 3.0    | 0.866       | 3461.6          | 81.6    | 3458.9          | 34.5    | 3457.4          | 27.2    | -0.1    |
| OG-1-9                 | 142           | 32896       | 0.97 | 3.350      | 1.6    | 30.2669    | 3.4    | 0.73578    | 2.9    | 0.875       | 3554.9          | 80.3    | 3495.5          | 33.0    | 3461.6          | 25.2    | -2.7    |
| OG-1-10                | 120           | 34149131    | 1.78 | 3.335      | 1.7    | 29.2525    | 3.0    | 0.70782    | 2.5    | 0.828       | 3450.2          | 66.5    | 3462.0          | 29.5    | 3468.9          | 26.1    | 0.5     |
| OG-1-11                | 124           | 56427       | 1.03 | 3.382      | 1.6    | 29.4470    | 3.1    | 0.72260    | 2.7    | 0.862       | 3505.8          | 71.9    | 3468.5          | 30.3    | 3447.1          | 24.2    | -1.7    |
| OG-1-12                | 108           | 39078       | 1.24 | 3.342      | 1.7    | 29.1036    | 3.2    | 0.70576    | 2.8    | 0.857       | 3442.5          | 73.4    | 3457.0          | 31.5    | 3465.5          | 25.6    | 0.7     |
| OG-1-13                | 82            | 490223      | 1.82 | 3.381      | 1.8    | 27.9712    | 3.7    | 0.68619    | 3.3    | 0.878       | 3368.1          | 85.6    | 3418.1          | 36.5    | 3447.5          | 27.6    | 2.3     |
| OG-1-14                | 137           | 106206      | 0.96 | 3.360      | 1.3    | 30.0052    | 3.0    | 0.73141    | 2.7    | 0.897       | 3538.7          | 74.1    | 3487.0          | 29.8    | 3457.4          | 20.7    | -2.4    |
| OG-1-15                | 234           | 82184       | 0.78 | 3.361      | 2.4    | 30.0373    | 4.1    | 0.73247    | 3.3    | 0.815       | 3542.6          | 90.5    | 3488.0          | 40.0    | 3456.8          | 36.6    | -2.5    |
| <b>OG1 no CA Run 2</b> |               |             |      |            |        |            |        |            |        |             |                 |         |                 |         |                 |         |         |
| OG-1 1                 | 151           | 1456089     | 1.21 | 3.503      | 1.7    | 27.0289    | 3.4    | 0.68709    | 2.9    | 0.861       | 3371.5          | 77.2    | 3385            | 33.4    | 3392.2          | 27      | 0.6     |
| OG-1 10                | 149           | 732527      | 1.08 | 3.448      | 1.7    | 27.9491    | 3.3    | 0.69928    | 2.9    | 0.862       | 3417.9          | 75.9    | 3417            | 32.6    | 3416.9          | 26.2    | 0.0     |
| OG-1 11                | 103           | 189122      | 1.29 | 3.498      | 1.6    | 26.5579    | 3.6    | 0.67403    | 3.2    | 0.898       | 3321.4          | 84      | 3367            | 35.3    | 3394.7          | 24.7    | 2.2     |
| OG-1 12                | 149           | 12448337    | 0.81 | 3.488      | 1.8    | 28.6768    | 3.7    | 0.72568    | 3.2    | 0.878       | 3517.3          | 88      | 3443            | 36.3    | 3399.3          | 27.6    | -3.5    |
| OG-1 13                | 168           | 333264      | 1.07 | 3.5        | 1.7    | 27.4592    | 3.1    | 0.69725    | 2.5    | 0.823       | 3410.2          | 66.7    | 3400            | 30      | 3393.9          | 27      | -0.5    |
| OG-1 14                | 101           | 1972914     | 2.04 | 3.425      | 2.1    | 28.3406    | 4      | 0.70441    | 3.4    | 0.853       | 3437.4          | 90.8    | 3431            | 39.2    | 3427.2          | 32.4    | -0.3    |
| OG-1 15                | 107           | 2672274     | 1.33 | 3.44       | 1.7    | 27.7134    | 3.1    | 0.69169    | 2.6    | 0.839       | 3389            | 68      | 3409            | 30.1    | 3420.8          | 26      | 0.9     |
| OG-1 16                | 115           | 7947051     | 2.07 | 3.435      | 2.1    | 27.9595    | 4.1    | 0.69686    | 3.5    | 0.851       | 3408.7          | 91.6    | 3418            | 39.9    | 3422.9          | 33.2    | 0.4     |
| OG-1 17                | 110           | 1033510     | 1.26 | 3.46       | 2      | 27.7295    | 3.6    | 0.69615    | 3      | 0.834       | 3406            | 79      | 3410            | 35.1    | 3411.6          | 30.7    | 0.2     |
| OG-1 18                | 104           | 1644932     | 1.52 | 3.42       | 1.9    | 28.4781    | 3.4    | 0.70672    | 2.8    | 0.828       | 3446.1          | 75.1    | 3436            | 33.3    | 3429.6          | 29.6    | -0.5    |
| OG-1 19                | 109           | 283161      | 1.57 | 3.43       | 1.5    | 28.5432    | 2.9    | 0.71046    | 2.5    | 0.852       | 3460.2          | 65.7    | 3438            | 28.2    | 3425            | 23.5    | -1.0    |
| OG-1 2                 | 59            | 392504      | 1.7  | 3.413      | 1.9    | 28.9708    | 3.9    | 0.71737    | 3.4    | 0.87        | 3486.2          | 90.9    | 3453            | 38.1    | 3433.1          | 29.8    | -1.5    |
| OG-1 20                | 117           | 8027831     | 2.32 | 3.466      | 1.5    | 28.0342    | 3.2    | 0.70508    | 2.8    | 0.878       | 3439.9          | 74.4    | 3420            | 31.2    | 3408.8          | 23.7    | -0.9    |
| OG-1 21                | 128           | 320372      | 1.28 | 3.48       | 1.5    | 27.522     | 3.1    | 0.6949     | 2.7    | 0.882       | 3401.3          | 72.3    | 3402            | 30.4    | 3402.7          | 22.8    | 0.0     |
| OG-1 22                | 203           | 244000      | 1.05 | 3.506      | 1.5    | 27.2082    | 2.9    | 0.69224    | 2.5    | 0.856       | 3391.2          | 65.8    | 3391            | 28.5    | 3390.9          | 23.4    | 0.0     |
| OG-1 23                | 89            | 1129186     | 1.86 | 3.443      | 1.6    | 28.2374    | 3      | 0.70537    | 2.6    | 0.851       | 3441            | 68.4    | 3427            | 29.6    | 3419.4          | 24.6    | -0.6    |
| OG-1 24                | 131           | 220508      | 0.96 | 3.468      | 2.2    | 27.7448    | 4      | 0.69814    | 3.4    | 0.833       | 3413.6          | 89.1    | 3410            | 39.6    | 3408.1          | 34.8    | -0.2    |
| OG-1 25                | 203           | 176861      | 0.93 | 3.542      | 1      | 26.768     | 2.1    | 0.68799    | 1.9    | 0.873       | 3375            | 48.8    | 3375            | 20.8    | 3375            | 16.2    | 0.0     |
| OG-1 26                | 136           | 415488      | 1.15 | 3.483      | 1.4    | 27.4646    | 2.6    | 0.69414    | 2.2    | 0.837       | 3398.4          | 58.4    | 3400            | 25.9    | 3401.2          | 22.5    | 0.1     |
| OG-1 27                | 89            | 254817      | 2.97 | 3.451      | 1.8    | 27.3878    | 3      | 0.68588    | 2.4    | 0.793       | 3366.9          | 62.7    | 3397            | 29.5    | 3415.5          | 28.6    | 1.4     |
| OG-1 28                | 113           | 314606      | 1.85 | 3.462      | 1.7    | 27.9509    | 3.1    | 0.70215    | 2.6    | 0.841       | 3428.8          | 70.1    | 3417            | 30.7    | 3410.7          | 26.4    | -0.5    |
| OG-1 29                | 105           | 11011109    | 1.43 | 3.441      | 2      | 28.2678    | 3.2    | 0.70578    | 2.5    | 0.79        | 3442.5          | 68      | 3428            | 31.7    | 3420.2          | 30.8    | -0.7    |

|         |     |          |      |       |     |         |     |         |     |       |        |      |      |      |        |      |      |
|---------|-----|----------|------|-------|-----|---------|-----|---------|-----|-------|--------|------|------|------|--------|------|------|
| OG-1 3  | 135 | 173329   | 1.35 | 3.481 | 1.7 | 27.3708 | 3.5 | 0.69135 | 3   | 0.866 | 3387.8 | 78.9 | 3397 | 33.9 | 3402.2 | 26.9 | 0.4  |
| OG-1 30 | 117 | 364464   | 2    | 3.459 | 2   | 27.5723 | 2.8 | 0.69193 | 1.9 | 0.702 | 3390   | 51.1 | 3404 | 27.1 | 3412.3 | 30.6 | 0.7  |
| OG-1 4  | 91  | 1140402  | 1.88 | 3.441 | 1.5 | 28.094  | 3.7 | 0.70149 | 3.3 | 0.908 | 3426.3 | 88.8 | 3422 | 36.1 | 3420.1 | 24   | -0.2 |
| OG-1 5  | 207 | 14853207 | 0.98 | 3.569 | 2   | 27.2014 | 3.6 | 0.70449 | 3   | 0.829 | 3437.7 | 79.2 | 3391 | 35.1 | 3363.1 | 31.3 | -2.2 |
| OG-1 6  | 181 | 790308   | 0.96 | 3.515 | 1.5 | 26.9445 | 3.2 | 0.68724 | 2.8 | 0.881 | 3372.1 | 74.8 | 3381 | 31.7 | 3387   | 23.8 | 0.4  |
| OG-1 7  | 159 | 3914788  | 1.2  | 3.508 | 2   | 27.2128 | 3.3 | 0.69264 | 2.6 | 0.791 | 3392.7 | 68.2 | 3391 | 32   | 3390.2 | 31.2 | -0.1 |
| OG-1 8  | 158 | 541263   | 1.14 | 3.501 | 1.8 | 27.4365 | 3.7 | 0.69703 | 3.3 | 0.877 | 3409.4 | 86.1 | 3399 | 36.3 | 3393.2 | 27.8 | -0.5 |
| OG-1 9  | 91  | 192062   | 1.22 | 3.45  | 1.8 | 27.7848 | 3.7 | 0.6955  | 3.2 | 0.871 | 3403.6 | 85.5 | 3412 | 36.4 | 3416.2 | 28.4 | 0.4  |

| Composition               |      |          |      |        |     |         |     |         |     | Ages  |        |       |        |      |        |      |       |
|---------------------------|------|----------|------|--------|-----|---------|-----|---------|-----|-------|--------|-------|--------|------|--------|------|-------|
| Zircon                    | U    | 206Pb/   | U/Th | 206Pb/ | 2σ  | 207Pb/  | 2σ  | 206Pb/  | 2σ  | Error | 206Pb/ | 2σ    | 207Pb/ | 2σ   | 206Pb/ | 2σ   | %     |
| #                         | (ppm | 204Pb    |      | 207Pb  | (%) | 235U    | (%) | 238U    | (%) | Corr. | 238U   | (Ma)  | 235U   | (Ma) | 207Pb  | (Ma) | Disc. |
| OG1 CA Run 1              |      |          |      |        |     |         |     |         |     |       |        |       |        |      |        |      |       |
| OG-1-1                    | 223  | 72506    | 1.08 | 3.276  | 1.8 | 28.6802 | 3.1 | 0.68169 | 2.5 | 0.815 | 3350.9 | 65.6  | 3442.6 | 30.2 | 3496.5 | 27.6 | 4.2   |
| OG-1-2                    | 215  | 77233    | 2.00 | 3.297  | 1.9 | 29.7917 | 3.3 | 0.71275 | 2.7 | 0.807 | 3468.8 | 71.1  | 3480.0 | 32.3 | 3486.4 | 30.0 | 0.5   |
| OG-1-3                    | 207  | 31715    | 1.01 | 3.295  | 2.0 | 29.3078 | 4.3 | 0.70073 | 3.8 | 0.881 | 3423.4 | 101.2 | 3463.9 | 42.5 | 3487.4 | 31.7 | 1.8   |
| OG-1-4                    | 237  | 24627    | 1.02 | 3.283  | 1.8 | 29.7451 | 3.8 | 0.70849 | 3.3 | 0.877 | 3452.8 | 87.9  | 3478.4 | 36.8 | 3493.2 | 27.9 | 1.2   |
| OG-1-5                    | 262  | 63669    | 0.87 | 3.288  | 1.7 | 28.7367 | 3.5 | 0.68558 | 3.1 | 0.880 | 3365.7 | 80.7  | 3444.6 | 34.4 | 3490.7 | 25.8 | 3.6   |
| OG-1-6                    | 188  | 43529    | 1.07 | 3.293  | 1.8 | 29.4500 | 3.3 | 0.70375 | 2.8 | 0.835 | 3434.9 | 73.7  | 3468.6 | 32.6 | 3488.2 | 28.2 | 1.5   |
| OG-1-7                    | 240  | 164076   | 0.88 | 3.319  | 1.5 | 28.2929 | 3.2 | 0.68140 | 2.8 | 0.881 | 3349.7 | 73.4  | 3429.3 | 31.3 | 3476.1 | 23.4 | 3.6   |
| OG-1-8                    | 174  | 31108    | 1.99 | 3.311  | 1.9 | 29.4110 | 3.4 | 0.70660 | 2.8 | 0.825 | 3445.6 | 74.8  | 3467.3 | 33.4 | 3479.9 | 29.7 | 1.0   |
| OG-1-9                    | 183  | 145609   | 0.88 | 3.347  | 1.7 | 27.9691 | 4.4 | 0.67927 | 4.1 | 0.926 | 3341.6 | 105.7 | 3418.0 | 42.9 | 3463.1 | 25.7 | 3.5   |
| OG-1-10                   | 162  | 2208756  | 1.06 | 3.320  | 1.4 | 28.7629 | 2.9 | 0.69287 | 2.5 | 0.877 | 3393.6 | 67.3  | 3445.5 | 28.5 | 3475.8 | 21.7 | 2.4   |
| OG-1-12                   | 258  | 61601    | 1.65 | 3.327  | 2.2 | 29.3154 | 3.9 | 0.70758 | 3.3 | 0.835 | 3449.3 | 87.4  | 3464.1 | 38.5 | 3472.7 | 33.5 | 0.7   |
| OG-1-13                   | 196  | 35636    | 1.25 | 3.330  | 1.8 | 28.4372 | 3.6 | 0.68719 | 3.1 | 0.869 | 3371.9 | 82.3  | 3434.3 | 35.4 | 3470.9 | 27.6 | 2.9   |
| OG-1-14                   | 126  | 61923    | 1.48 | 3.370  | 1.9 | 28.5770 | 3.5 | 0.69869 | 2.9 | 0.835 | 3415.7 | 76.5  | 3439.1 | 33.9 | 3452.8 | 29.5 | 1.1   |
| OG-1-15                   | 147  | 28665    | 1.87 | 3.359  | 1.5 | 28.4023 | 3.0 | 0.69213 | 2.5 | 0.858 | 3390.7 | 66.8  | 3433.1 | 29.0 | 3457.9 | 23.5 | 1.9   |
| OG1 CA Run 1 (discordant) |      |          |      |        |     |         |     |         |     |       |        |       |        |      |        |      |       |
| OG-1-11                   | 995  | 25627    | 5.50 | 17.040 | 2.1 | 0.7325  | 3.4 | 0.09056 | 2.8 | 0.802 | 558.9  | 14.8  | 558.0  | 14.8 | 554.4  | 44.8 | -0.8  |
| OG1 CA Run 2              |      |          |      |        |     |         |     |         |     |       |        |       |        |      |        |      |       |
| OG-1 1                    | 271  | 2134663  | 1.04 | 3.355  | 1.7 | 29.0162 | 3.7 | 0.70631 | 3.3 | 0.883 | 3444.5 | 87    | 3454   | 36.2 | 3459.6 | 26.9 | 0.4   |
| OG-1 10                   | 137  | 137257   | 1.11 | 3.373  | 2.2 | 29.2304 | 4.3 | 0.71536 | 3.7 | 0.862 | 3478.6 | 98.9  | 3461   | 41.9 | 3451.3 | 33.5 | -0.8  |
| OG-1 11                   | 189  | 1739853  | 1.7  | 3.413  | 2.4 | 29.145  | 4.3 | 0.72171 | 3.5 | 0.828 | 3502.4 | 95.6  | 3458   | 42   | 3433   | 37.3 | -2.0  |
| OG-1 12                   | 229  | 29212251 | 2.02 | 3.357  | 2.1 | 29.2441 | 3.4 | 0.71236 | 2.7 | 0.782 | 3467.4 | 71.3  | 3462   | 33.4 | 3458.5 | 32.8 | -0.3  |
| OG-1 13                   | 206  | 1625390  | 1.25 | 3.349  | 1.5 | 29.4544 | 3.9 | 0.71581 | 3.6 | 0.923 | 3480.3 | 97.2  | 3469   | 38.4 | 3462.1 | 23.3 | -0.5  |
| OG-1 14                   | 126  | 118534   | 1.4  | 3.377  | 1.6 | 29.8246 | 4.1 | 0.73083 | 3.7 | 0.918 | 3536.5 | 101.9 | 3481   | 40.1 | 3449.3 | 25.1 | -2.5  |
| OG-1 15                   | 143  | 141581   | 1.54 | 3.351  | 1.9 | 29.4882 | 3   | 0.71693 | 2.3 | 0.777 | 3484.5 | 63.2  | 3470   | 29.6 | 3461.5 | 29.4 | -0.7  |
| OG-1 16                   | 183  | 125951   | 1.13 | 3.417  | 1.6 | 28.7861 | 3.7 | 0.7137  | 3.3 | 0.897 | 3472.4 | 88    | 3446   | 35.9 | 3431.1 | 25.1 | -1.2  |
| OG-1 17                   | 252  | 387267   | 1.07 | 3.386  | 2.1 | 28.897  | 3.1 | 0.70995 | 2.3 | 0.739 | 3458.3 | 61.3  | 3450   | 30.4 | 3445.2 | 32.4 | -0.4  |
| OG-1 18                   | 116  | 339147   | 1.6  | 3.363  | 1.5 | 29.9107 | 4   | 0.7299  | 3.7 | 0.925 | 3533   | 100.6 | 3484   | 39.3 | 3455.7 | 23.6 | -2.2  |
| OG-1 19                   | 225  | 313161   | 1.3  | 3.33   | 1.4 | 29.5722 | 2.8 | 0.71462 | 2.5 | 0.87  | 3475.9 | 66    | 3473   | 27.8 | 3470.9 | 21.6 | -0.1  |
| OG-1 2                    | 161  | 1602974  | 1.37 | 3.374  | 1.5 | 29.1643 | 3.3 | 0.71409 | 3   | 0.894 | 3473.9 | 79.3  | 3459   | 32.4 | 3450.5 | 23   | -0.7  |
| OG-1 20                   | 171  | 349233   | 1.83 | 3.347  | 1.8 | 29.7542 | 3.4 | 0.72257 | 2.9 | 0.858 | 3505.7 | 79.3  | 3479   | 33.6 | 3463.2 | 27.2 | -1.2  |
| OG-1 21                   | 132  | 382743   | 1.19 | 3.373  | 1.5 | 29.019  | 3   | 0.71015 | 2.6 | 0.868 | 3459   | 70.5  | 3454   | 29.8 | 3451.3 | 23.3 | -0.2  |

|         |     |        |      |       |     |         |     |         |     |       |        |      |      |      |        |      |     |
|---------|-----|--------|------|-------|-----|---------|-----|---------|-----|-------|--------|------|------|------|--------|------|-----|
| OG-1 22 | 351 | 616713 | 0.79 | 3.341 | 1.5 | 28.9015 | 2.4 | 0.70062 | 1.9 | 0.772 | 3423   | 49.4 | 3450 | 23.7 | 3466   | 23.7 | 1.2 |
| OG-1 23 | 327 | 576063 | 0.82 | 3.373 | 1.8 | 28.4621 | 3.4 | 0.69658 | 2.8 | 0.838 | 3407.7 | 74.7 | 3435 | 33   | 3451.2 | 28.5 | 1.3 |
| OG-1 24 | 165 | 371690 | 1.78 | 3.374 | 1.3 | 28.8363 | 3   | 0.70594 | 2.7 | 0.901 | 3443.1 | 72   | 3448 | 29.4 | 3450.8 | 20.2 | 0.2 |
| OG-1 25 | 230 | 701733 | 0.95 | 3.376 | 2.1 | 28.5796 | 3.3 | 0.70019 | 2.5 | 0.758 | 3421.4 | 65.5 | 3439 | 31.9 | 3449.6 | 32.9 | 0.8 |
| OG-1 26 | 260 | 830019 | 1.86 | 3.354 | 1.6 | 29.0407 | 2.8 | 0.7068  | 2.4 | 0.837 | 3446.4 | 63.6 | 3455 | 27.9 | 3459.8 | 24.1 | 0.4 |
| OG-1 27 | 222 | 777709 | 0.94 | 3.361 | 1.7 | 29.0183 | 2.7 | 0.70768 | 2.1 | 0.789 | 3449.7 | 56.7 | 3454 | 26.4 | 3456.7 | 25.6 | 0.2 |
| OG-1 28 | 163 | 308155 | 1    | 3.354 | 1.3 | 28.2759 | 3.3 | 0.68814 | 3   | 0.914 | 3375.5 | 78.5 | 3429 | 32.1 | 3459.9 | 20.5 | 2.4 |
| OG-1 29 | 327 | 718523 | 1.17 | 3.34  | 2.1 | 28.1684 | 3.7 | 0.68275 | 3.1 | 0.823 | 3354.9 | 80.5 | 3425 | 36.7 | 3466.2 | 32.9 | 3.2 |
| OG-1 3  | 258 | 672577 | 0.92 | 3.309 | 1.8 | 28.7723 | 3.5 | 0.69081 | 3   | 0.851 | 3385.7 | 78.6 | 3446 | 34.4 | 3480.9 | 28.5 | 2.7 |
| OG-1 30 | 277 | 308037 | 0.93 | 3.374 | 1.5 | 28.6633 | 3.3 | 0.70177 | 3   | 0.899 | 3427.4 | 79.5 | 3442 | 32.6 | 3450.6 | 22.6 | 0.7 |
| OG-1 4  | 143 | 267750 | 1.31 | 3.389 | 2.1 | 28.6482 | 4.1 | 0.70441 | 3.6 | 0.867 | 3437.3 | 95.3 | 3442 | 40.5 | 3444   | 31.9 | 0.2 |
| OG-1 5  | 267 | 490462 | 1.4  | 3.341 | 1.4 | 29.2091 | 2.9 | 0.70813 | 2.5 | 0.876 | 3451.4 | 67.6 | 3461 | 28.4 | 3465.9 | 21.6 | 0.4 |
| OG-1 6  | 238 | 342434 | 1.82 | 3.324 | 1.9 | 28.6873 | 3.5 | 0.69195 | 2.9 | 0.829 | 3390.1 | 75.7 | 3443 | 34   | 3473.7 | 30   | 2.4 |
| OG-1 7  | 178 | 196016 | 1.81 | 3.35  | 2   | 28.5833 | 3   | 0.69478 | 2.3 | 0.75  | 3400.8 | 60.4 | 3439 | 29.9 | 3461.8 | 31.2 | 1.8 |
| OG-1 8  | 198 | 316443 | 1.92 | 3.337 | 2.1 | 28.606  | 3.2 | 0.69262 | 2.5 | 0.767 | 3392.6 | 65.1 | 3440 | 31.6 | 3467.9 | 32.1 | 2.2 |
| OG-1 9  | 315 | 311377 | 1.23 | 3.352 | 1.9 | 28.8112 | 3.1 | 0.7008  | 2.5 | 0.791 | 3423.7 | 66.1 | 3447 | 30.9 | 3460.7 | 29.8 | 1.1 |
