# Supplementary material for: Increased accuracy and precision in igneous and detrital zircon geochronology using CA-LA-ICPMS
Source: Copernicus journal article supplement (doi:10.5194/gchron-2023-20), 2023-08-25
Supplement: Supplementary file 16 [file gchron-2023-20-supplement.zip]

**TABLE S1: FISH CANYON LA-ICPMS U-Pb ZIRCON GEOCHRONOLOGY**

| Zircon<br>#                                 | Composition |        |      | Ages   |            |        |            |         |            |       |        |            |        |            |        |            |        |
|---------------------------------------------|-------------|--------|------|--------|------------|--------|------------|---------|------------|-------|--------|------------|--------|------------|--------|------------|--------|
|                                             | U           | 206Pb/ | U/Th | 206Pb/ | 2 $\sigma$ | 207Pb/ | 2 $\sigma$ | 206Pb/  | 2 $\sigma$ | error | 206Pb/ | 2 $\sigma$ | 207Pb/ | 2 $\sigma$ | 206Pb/ | 2 $\sigma$ | %      |
|                                             | (ppm)       | 204Pb  |      | 207Pb  | (%)        | 235U   | (%)        | 238U    | (%)        | corr. | 238U   | (Ma)       | 235U   | (Ma)       | 207Pb  | (Ma)       | Disc.  |
| <b>Fish Canyon no CA Run 1</b>              |             |        |      |        |            |        |            |         |            |       |        |            |        |            |        |            |        |
| Fish Canyon-1                               | 575         | 3013   | 2.27 | 19.391 | 5.8        | 0.0307 | 7.6        | 0.00432 | 4.9        | 0.640 | 27.8   | 1.3        | 30.7   | 2.3        | 265.4  | 134.2      | 89.5   |
| Fish Canyon-2                               | 469         | 757    | 2.55 | 29.950 | 20.6       | 0.0212 | 22.9       | 0.00461 | 10.1       | 0.439 | 29.7   | 3.0        | 21.3   | 4.8        | NA     | NA         | NA     |
| Fish Canyon-3                               | 347         | 879    | 1.18 | 25.229 | 29.4       | 0.0240 | 30.9       | 0.00439 | 9.7        | 0.313 | 28.2   | 2.7        | 24.1   | 7.4        | NA     | NA         | NA     |
| Fish Canyon-5                               | 247         | 1070   | 2.40 | 25.905 | 11.3       | 0.0253 | 14.1       | 0.00476 | 8.4        | 0.598 | 30.6   | 2.6        | 25.4   | 3.5        | NA     | NA         | NA     |
| Fish Canyon-6                               | 262         | 920    | 2.28 | 28.107 | 15.7       | 0.0237 | 18.8       | 0.00484 | 10.3       | 0.551 | 31.1   | 3.2        | 23.8   | 4.4        | NA     | NA         | NA     |
| Fish Canyon-8                               | 433         | 1699   | 2.33 | 22.244 | 21.0       | 0.0307 | 23.4       | 0.00495 | 10.3       | 0.441 | 31.8   | 3.3        | 30.7   | 7.1        | NA     | NA         | NA     |
| <b>Fish Canyon no CA Run 1 (discordant)</b> |             |        |      |        |            |        |            |         |            |       |        |            |        |            |        |            |        |
| Fish Canyon-4                               | 135         | 1251   | 1.16 | 24.164 | 14.4       | 0.0360 | 44.6       | 0.00632 | 42.2       | 0.947 | 40.6   | 17.1       | 35.9   | 15.7       | NA     | NA         | NA     |
| Fish Canyon-7                               | 157         | 5689   | 2.34 | 11.017 | 28.4       | 0.0678 | 32.5       | 0.00542 | 15.8       | 0.487 | 34.8   | 5.5        | 66.6   | 20.9       | 1440.9 | 543.5      | 97.6   |
| Fish Canyon-9                               | 195         | 397    | 1.40 | 29.335 | 26.8       | 0.0237 | 31.6       | 0.00505 | 16.6       | 0.528 | 32.5   | 5.4        | 23.8   | 7.4        | NA     | NA         | NA     |
| Fish Canyon-10                              | 452         | 1134   | 2.12 | 23.796 | 12.0       | 0.0240 | 17.3       | 0.00415 | 12.5       | 0.719 | 26.7   | 3.3        | 24.1   | 4.1        | NA     | NA         | NA     |
| Fish Canyon-11                              | 158         | 189    | 2.52 | 36.304 | 56.2       | 0.0185 | 58.6       | 0.00488 | 16.8       | 0.287 | 31.4   | 5.3        | 18.6   | 10.8       | NA     | NA         | NA     |
| Fish Canyon-12                              | 323         | 33433  | 2.65 | 19.317 | 10.5       | 0.0365 | 17.0       | 0.00511 | 13.4       | 0.786 | 32.9   | 4.4        | 36.4   | 6.1        | 274.2  | 241.2      | 88.0   |
| Fish Canyon-13                              | 305         | 413    | 1.15 | 53.117 | 28.7       | 0.0127 | 30.3       | 0.00489 | 9.8        | 0.324 | 31.5   | 3.1        | 12.8   | 3.9        | NA     | NA         | NA     |
| Fish Canyon-14                              | 304         | 575    | 1.53 | 18.765 | 42.2       | 0.0374 | 43.4       | 0.00509 | 10.1       | 0.233 | 32.8   | 3.3        | 37.3   | 15.9       | 340.2  | NA         | 90.4   |
| Fish Canyon-15                              | 139         | 191    | 1.22 | 21.003 | 42.1       | 0.0297 | 44.7       | 0.00452 | 15.1       | 0.338 | 29.1   | 4.4        | 29.7   | 13.1       | 79.0   | NA         | 63.2   |
| <b>Fish Canyon no CA Run 2</b>              |             |        |      |        |            |        |            |         |            |       |        |            |        |            |        |            |        |
| FishC_1                                     | 362         | 26992  | 1.48 | 22.042 | 6.5        | 0.0273 | 7.6        | 0.00437 | 4          | 0.519 | 28.1   | 1.1        | 27.4   | 2.1        | 36.9   | 158.3      | 23.8   |
| FishC_10                                    | 419         | 29024  | 2.3  | 21.458 | 6.4        | 0.0276 | 7.2        | 0.0043  | 3.3        | 0.463 | 27.7   | 0.9        | 27.7   | 2          | 27.9   | 152.4      | 0.7    |
| FishC_11                                    | 334         | 5000   | 2.41 | 22.175 | 12.7       | 0.0269 | 12.9       | 0.00433 | 2.5        | 0.197 | 27.9   | 0.7        | 27     | 3.4        | 51.5   | 308.3      | 45.8   |
| FishC_12                                    | 52          | 5000   | 2.43 | 21.207 | 17.1       | 0.03   | 18.4       | 0.00461 | 6.9        | 0.373 | 29.7   | 2          | 30     | 5.4        | 56     | 408.1      | 47.0   |
| FishC_13                                    | 270         | 5000   | 2.58 | 22.094 | 13         | 0.0278 | 13.4       | 0.00446 | 3.4        | 0.25  | 28.7   | 1          | 27.8   | 3.7        | 42.7   | 316.2      | 32.8   |
| FishC_14                                    | 1173        | 24959  | 0.46 | 21.088 | 5.2        | 0.0301 | 5.9        | 0.0046  | 2.8        | 0.466 | 29.6   | 0.8        | 30.1   | 1.8        | 69.3   | 124.9      | 57.3   |
| FishC_15                                    | 355         | 5000   | 1.67 | 23.371 | 12.1       | 0.0274 | 12.4       | 0.00464 | 2.8        | 0.228 | 29.8   | 0.8        | 27.4   | 3.3        | 500    | 1          | 94.0   |
| FishC_16                                    | 324         | 53203  | 1.9  | 21.802 | 8          | 0.0278 | 8.8        | 0.00441 | 3.5        | 0.403 | 28.3   | 1          | 27.9   | 2.4        | 10.4   | 194.2      | -172.1 |
| FishC_17                                    | 231         | 5000   | 0.94 | 16.566 | 19.7       | 0.0363 | 19.9       | 0.00437 | 2.8        | 0.141 | 28.1   | 0.8        | 36.2   | 7.1        | 615.7  | 427.1      | 95.4   |
| FishC_18                                    | 597         | 5000   | 0.51 | 22.699 | 12         | 0.0283 | 12.3       | 0.00466 | 2.3        | 0.187 | 30     | 0.7        | 28.3   | 3.4        | 108.8  | 296.6      | 72.4   |
| FishC_19                                    | 251         | 362179 | 1.51 | 21.113 | 7.5        | 0.0283 | 8.3        | 0.00434 | 3.5        | 0.421 | 27.9   | 1          | 28.3   | 2.3        | 66.5   | 179.6      | 58.0   |
| FishC_2                                     | 171         | 5000   | 2.93 | 22.027 | 12         | 0.028  | 12.7       | 0.00447 | 4          | 0.318 | 28.8   | 1.2        | 28     | 3.5        | 35.2   | 291.6      | 18.2   |
| FishC_20                                    | 425         | 5000   | 1.67 | 21.807 | 11.6       | 0.0277 | 12         | 0.00438 | 3.3        | 0.277 | 28.2   | 0.9        | 27.7   | 3.3        | 10.9   | 279.9      | -158.7 |
| FishC_21                                    | 193         | 5000   | 2.41 | 22.722 | 14.9       | 0.0264 | 15.2       | 0.00436 | 2.9        | 0.191 | 28     | 0.8        | 26.5   | 4          | 111.2  | 368.1      | 74.8   |
| FishC_23                                    | 294         | 5000   | 2.52 | 22.19  | 12.8       | 0.0275 | 13.3       | 0.00443 | 3.5        | 0.264 | 28.5   | 1          | 27.6   | 3.6        | 53.2   | 312.5      | 46.4   |
| FishC_24                                    | 120         | 47240  | 1.17 | 18.989 | 12.6       | 0.0318 | 13.4       | 0.00439 | 4.6        | 0.34  | 28.2   | 1.3        | 31.8   | 4.2        | 313.2  | 287.9      | 91.0   |
| FishC_25                                    | 304         | 5000   | 2.4  | 22.313 | 12.9       | 0.0272 | 13.5       | 0.0044  | 3.7        | 0.276 | 28.3   | 1          | 27.2   | 3.6        | 66.6   | 316        | 57.5   |
| FishC_26                                    | 228         | 45799  | 2.96 | 21.814 | 9.6        | 0.028  | 10         | 0.00444 | 2.8        | 0.281 | 28.5   | 0.8        | 28.1   | 2.8        | 11.8   | 231.6      | -141.5 |
| FishC_27                                    | 344         | 5000   | 1.85 | 23.196 | 13         | 0.0263 | 13.6       | 0.00443 | 3.7        | 0.275 | 28.5   | 1.1        | 26.4   | 3.5        | 162.3  | 324.6      | 82.4   |
| FishC_28                                    | 517         | 5000   | 1.4  | 22.703 | 12.2       | 0.0271 | 12.5       | 0.00446 | 2.9        | 0.232 | 28.7   | 0.8        | 27.1   | 3.3        | 109.2  | 299.5      | 73.7   |
| FishC_29                                    | 488         | 5000   | 1.46 | 21.892 | 11.8       | 0.0273 | 12.1       | 0.00433 | 2.8        | 0.227 | 27.8   | 0.8        | 27.3   | 3.3        | 20.3   | 286        | -36.9  |

|          |     |       |      |        |      |        |      |         |     |       |      |     |      |     |       |       |       |
|----------|-----|-------|------|--------|------|--------|------|---------|-----|-------|------|-----|------|-----|-------|-------|-------|
| FishC_3  | 258 | 5000  | 2.46 | 21.35  | 13   | 0.0286 | 13.2 | 0.00443 | 2.6 | 0.193 | 28.5 | 0.7 | 28.7 | 3.7 | 39.9  | 310.6 | 28.6  |
| FishC_30 | 396 | 73929 | 1.64 | 21.906 | 6.4  | 0.0285 | 7.1  | 0.00452 | 2.9 | 0.412 | 29.1 | 0.8 | 28.5 | 2   | 22    | 156.1 | -32.3 |
| FishC_4  | 321 | 5000  | 2.27 | 20.639 | 12.1 | 0.0289 | 12.4 | 0.00432 | 2.6 | 0.213 | 27.8 | 0.7 | 28.9 | 3.5 | 120.3 | 285.2 | 76.9  |
| FishC_5  | 184 | 5000  | 1.01 | 21.906 | 13.6 | 0.028  | 14.3 | 0.00444 | 4.4 | 0.31  | 28.6 | 1.3 | 28   | 3.9 | 21.9  | 328.3 | -30.6 |
| FishC_6  | 582 | 5000  | 1.7  | 22.424 | 11.6 | 0.027  | 12   | 0.0044  | 3.1 | 0.254 | 28.3 | 0.9 | 27.1 | 3.2 | 78.8  | 285   | 64.1  |
| FishC_8  | 319 | 5000  | 2.32 | 22.716 | 12.4 | 0.0271 | 13   | 0.00446 | 4.1 | 0.317 | 28.7 | 1.2 | 27.1 | 3.5 | 110.6 | 304.8 | 74.1  |
| FishC_9  | 309 | 5000  | 2.45 | 22.292 | 11.3 | 0.0275 | 11.8 | 0.00445 | 3.3 | 0.276 | 28.6 | 0.9 | 27.5 | 3.2 | 64.4  | 276.6 | 55.6  |

**Fish Canyon no CA Run 2 (discordant)**

|          |    |      |      |       |     |        |     |         |   |       |      |   |       |    |      |       |      |
|----------|----|------|------|-------|-----|--------|-----|---------|---|-------|------|---|-------|----|------|-------|------|
| FishC_22 | 61 | 5000 | 2.98 | 2.256 | 8.4 | 0.5751 | 9.7 | 0.00941 | 5 | 0.511 | 60.4 | 3 | 461.3 | 36 | 4062 | 124.6 | 98.5 |
|----------|----|------|------|-------|-----|--------|-----|---------|---|-------|------|---|-------|----|------|-------|------|

| Composition |       |        |      |        |     |        |     |        |     | Ages  |        |      |        |      |        |      |       |
|-------------|-------|--------|------|--------|-----|--------|-----|--------|-----|-------|--------|------|--------|------|--------|------|-------|
| Zircon      | U     | 206Pb/ | U/Th | 206Pb/ | 2σ  | 207Pb/ | 2σ  | 206Pb/ | 2σ  | error | 206Pb/ | 2σ   | 207Pb/ | 2σ   | 206Pb/ | 2σ   | %     |
| #           | (ppm) | 204Pb  |      | 207Pb  | (%) | 235U   | (%) | 238U   | (%) | corr. | 238U   | (Ma) | 235U   | (Ma) | 207Pb  | (Ma) | Disc. |

**Fish Canyon CA Run 1**

|                |      |        |      |        |      |        |      |         |      |       |      |     |      |     |       |       |       |
|----------------|------|--------|------|--------|------|--------|------|---------|------|-------|------|-----|------|-----|-------|-------|-------|
| Fish Canyon-2  | 265  | 2104   | 1.27 | 18.450 | 12.5 | 0.0378 | 17.3 | 0.00507 | 12.0 | 0.690 | 32.6 | 3.9 | 37.7 | 6.4 | 378.4 | 282.4 | 91.4  |
| Fish Canyon-3  | 446  | 10945  | 1.47 | 21.471 | 7.6  | 0.0309 | 11.4 | 0.00481 | 8.5  | 0.743 | 31.0 | 2.6 | 30.9 | 3.5 | 26.4  | NA    | -17.1 |
| Fish Canyon-4  | 1058 | 1171   | 1.59 | 23.211 | 11.8 | 0.0266 | 12.4 | 0.00448 | 3.9  | 0.313 | 28.8 | 1.1 | 26.7 | 3.3 | NA    | NA    |       |
| Fish Canyon-6  | 2292 | 31562  | 0.37 | 19.802 | 5.5  | 0.0321 | 6.1  | 0.00461 | 2.6  | 0.434 | 29.7 | 0.8 | 32.1 | 1.9 | 217.1 | 126.9 | 86.3  |
| Fish Canyon-7  | 734  | 123526 | 2.41 | 20.147 | 8.2  | 0.0318 | 10.1 | 0.00464 | 5.9  | 0.585 | 29.9 | 1.8 | 31.7 | 3.2 | 176.9 | 191.4 | 83.1  |
| Fish Canyon-9  | 593  | 2132   | 2.31 | 21.754 | 7.1  | 0.0280 | 8.0  | 0.00442 | 3.6  | 0.457 | 28.4 | 1.0 | 28.0 | 2.2 | NA    | NA    |       |
| Fish Canyon-10 | 726  | 5000   | 0.60 | 15.501 | 13.9 | 0.0438 | 16.0 | 0.00492 | 7.9  | 0.495 | 31.7 | 2.5 | 43.5 | 6.8 | 757.5 | 294.6 | 95.8  |
| Fish Canyon-14 | 445  | 2607   | 2.62 | 22.845 | 8.2  | 0.0305 | 11.8 | 0.00506 | 8.5  | 0.721 | 32.6 | 2.8 | 30.5 | 3.5 | NA    | NA    |       |

**Fish Canyon CA Run 1 (discordant)**

|                |     |      |      |         |       |        |       |         |      |       |      |      |      |      |       |       |      |
|----------------|-----|------|------|---------|-------|--------|-------|---------|------|-------|------|------|------|------|-------|-------|------|
| Fish Canyon-1  | 264 | 528  | 1.95 | 14.864  | 25.7  | 0.0431 | 27.5  | 0.00465 | 10.0 | 0.364 | 29.9 | 3.0  | 42.9 | 11.6 | 845.4 | 535.8 | 96.5 |
| Fish Canyon-5  | 139 | 335  | 1.11 | 160.018 | 442.8 | 0.0040 | 443.1 | 0.00469 | 14.3 | 0.032 | 30.2 | 4.3  | 4.1  | 18.1 | NA    | NA    |      |
| Fish Canyon-8  | 423 | 1896 | 0.90 | 27.441  | 11.1  | 0.0270 | 17.7  | 0.00537 | 13.7 | 0.776 | 34.5 | 4.7  | 27.0 | 4.7  | NA    | NA    |      |
| Fish Canyon-11 | 235 | 1069 | 3.08 | 16.495  | 23.0  | 0.0533 | 33.1  | 0.00638 | 23.8 | 0.720 | 41.0 | 9.7  | 52.7 | 17.0 | 624.9 | 496.9 | 93.4 |
| Fish Canyon-12 | 304 | 1824 | 2.71 | 26.782  | 8.5   | 0.0285 | 33.2  | 0.00553 | 32.0 | 0.966 | 35.6 | 11.4 | 28.5 | 9.3  | NA    | NA    |      |
| Fish Canyon-13 | 238 | 588  | 2.86 | 14.860  | 22.7  | 0.0427 | 25.1  | 0.00461 | 10.8 | 0.430 | 29.6 | 3.2  | 42.5 | 10.4 | 846.1 | 472.6 | 96.5 |
| Fish Canyon-15 | 273 | 675  | 0.57 | 31.296  | 26.0  | 0.0219 | 35.1  | 0.00496 | 23.6 | 0.672 | 31.9 | 7.5  | 22.0 | 7.6  | NA    | NA    |      |

**Fish Canyon CA Run 2**

|          |      |        |      |        |      |        |      |         |     |       |      |     |      |     |       |       |        |
|----------|------|--------|------|--------|------|--------|------|---------|-----|-------|------|-----|------|-----|-------|-------|--------|
| FishC 1  | 377  | 5000   | 0.89 | 22.441 | 12.7 | 0.028  | 13.4 | 0.00455 | 4.3 | 0.318 | 29.3 | 1.2 | 28   | 3.7 | 80.7  | 310.6 | 63.7   |
| FishC 10 | 376  | 5000   | 0.94 | 20.063 | 14.9 | 0.0309 | 15.4 | 0.00449 | 4   | 0.261 | 28.9 | 1.2 | 30.9 | 4.7 | 186.6 | 347.5 | 84.5   |
| FishC 11 | 387  | 5000   | 1.86 | 21.089 | 14   | 0.0302 | 14.6 | 0.00463 | 4.5 | 0.304 | 29.8 | 1.3 | 30.2 | 4.4 | 69.3  | 332.2 | 57.0   |
| FishC 12 | 928  | 5000   | 1.52 | 22.79  | 12.6 | 0.0273 | 13.3 | 0.00452 | 4.2 | 0.314 | 29   | 1.2 | 27.4 | 3.6 | 118.6 | 311.7 | 75.5   |
| FishC 13 | 868  | 82039  | 1.51 | 21.477 | 6.3  | 0.029  | 6.9  | 0.00452 | 2.8 | 0.411 | 29.1 | 0.8 | 29   | 2   | 25.7  | 150.7 | -13.2  |
| FishC 14 | 1137 | 58895  | 1.01 | 21.819 | 4.3  | 0.0286 | 5.5  | 0.00452 | 3.3 | 0.612 | 29.1 | 1   | 28.6 | 1.5 | 12.3  | 104.5 | -136.6 |
| FishC 15 | 445  | 5000   | 0.91 | 22.245 | 13.8 | 0.0277 | 14.1 | 0.00447 | 3.2 | 0.226 | 28.8 | 0.9 | 27.7 | 3.9 | 59.2  | 336.2 | 51.4   |
| FishC 16 | 542  | 432079 | 1.33 | 20.9   | 7.6  | 0.0296 | 8.3  | 0.00448 | 3.2 | 0.386 | 28.8 | 0.9 | 29.6 | 2.4 | 90.6  | 181.1 | 68.2   |
| FishC 17 | 884  | 24103  | 1.09 | 21.234 | 6.3  | 0.0288 | 7.3  | 0.00443 | 3.7 | 0.504 | 28.5 | 1   | 28.8 | 2.1 | 52.9  | 150.7 | 46.1   |
| FishC 18 | 392  | 5000   | 1.99 | 23.725 | 12.6 | 0.0269 | 13.2 | 0.00464 | 3.9 | 0.296 | 29.8 | 1.2 | 27   | 3.5 | 500   | 1     | 94.0   |
| FishC 19 | 746  | 5000   | 2.03 | 21.203 | 12.2 | 0.0287 | 13.5 | 0.00442 | 5.8 | 0.43  | 28.4 | 1.7 | 28.7 | 3.8 | 56.5  | 291.7 | 49.7   |
| FishC 2  | 391  | 5000   | 0.88 | 22.414 | 12.9 | 0.0272 | 13.6 | 0.00442 | 4.3 | 0.317 | 28.5 | 1.2 | 27.2 | 3.7 | 77.7  | 315.6 | 63.3   |
| FishC 20 | 401  | 27374  | 1.39 | 20.776 | 8.1  | 0.0301 | 9.1  | 0.00454 | 4.1 | 0.453 | 29.2 | 1.2 | 30.1 | 2.7 | 104.8 | 191.4 | 72.1   |

|          |      |        |      |        |      |        |      |         |     |       |      |     |      |     |       |       |        |
|----------|------|--------|------|--------|------|--------|------|---------|-----|-------|------|-----|------|-----|-------|-------|--------|
| FishC 21 | 441  | 5000   | 1.06 | 22.506 | 13.8 | 0.0278 | 14.1 | 0.00454 | 3   | 0.215 | 29.2 | 0.9 | 27.9 | 3.9 | 87.7  | 338.5 | 66.7   |
| FishC 22 | 675  | 5000   | 2.28 | 22.51  | 12.5 | 0.0278 | 12.8 | 0.00454 | 2.8 | 0.219 | 29.2 | 0.8 | 27.8 | 3.5 | 88.2  | 305.5 | 66.9   |
| FishC 23 | 820  | 5000   | 2.62 | 22.474 | 11.8 | 0.0276 | 12.1 | 0.0045  | 2.7 | 0.222 | 29   | 0.8 | 27.6 | 3.3 | 84.3  | 289.8 | 65.6   |
| FishC 24 | 73   | 5000   | 1.08 | 21.224 | 19.8 | 0.0304 | 21.1 | 0.00469 | 7.4 | 0.351 | 30.1 | 2.2 | 30.4 | 6.3 | 54    | 473.1 | 44.3   |
| FishC 25 | 545  | 21677  | 2.28 | 20.848 | 6.1  | 0.0291 | 7.4  | 0.00441 | 4.2 | 0.566 | 28.4 | 1.2 | 29.2 | 2.1 | 96.5  | 143.5 | 70.6   |
| FishC 26 | 620  | 5000   | 2.02 | 23.454 | 12.2 | 0.0267 | 12.7 | 0.00454 | 3.3 | 0.26  | 29.2 | 1   | 26.7 | 3.3 | 500   | 1     | 94.2   |
| FishC 27 | 681  | 39128  | 1.51 | 21.121 | 7.5  | 0.0291 | 8.4  | 0.00446 | 3.6 | 0.436 | 28.7 | 1   | 29.1 | 2.4 | 65.7  | 179.3 | 56.3   |
| FishC 28 | 742  | 589756 | 2.54 | 20.418 | 6.5  | 0.0298 | 7.1  | 0.00441 | 3   | 0.418 | 28.4 | 0.8 | 29.8 | 2.1 | 145.7 | 151.8 | 80.5   |
| FishC 29 | 671  | 5000   | 1.38 | 22.342 | 11.9 | 0.0274 | 12.2 | 0.00445 | 2.8 | 0.227 | 28.6 | 0.8 | 27.5 | 3.3 | 69.8  | 289.9 | 59.0   |
| FishC 3  | 320  | 5000   | 1.26 | 21.384 | 13.4 | 0.0286 | 14.4 | 0.00444 | 5.2 | 0.359 | 28.6 | 1.5 | 28.7 | 4.1 | 36.1  | 322   | 20.8   |
| FishC 30 | 655  | 5000   | 1.99 | 22.358 | 12   | 0.0273 | 12.5 | 0.00443 | 3.2 | 0.257 | 28.5 | 0.9 | 27.4 | 3.4 | 71.6  | 294.5 | 60.2   |
| FishC 4  | 85   | 5000   | 1.57 | 18.202 | 21.1 | 0.033  | 22.6 | 0.00436 | 8   | 0.353 | 28   | 2.2 | 33   | 7.3 | 408.7 | 473.5 | 93.1   |
| FishC 5  | 330  | 5000   | 1.44 | 21.913 | 12.9 | 0.0279 | 13.4 | 0.00444 | 3.5 | 0.263 | 28.6 | 1   | 28   | 3.7 | 22.7  | 312.3 | -26.0  |
| FishC 6  | 568  | 5000   | 0.87 | 21.807 | 13.2 | 0.0284 | 13.5 | 0.0045  | 2.8 | 0.206 | 29   | 0.8 | 28.5 | 3.8 | 11    | 318.9 | -163.6 |
| FishC 7  | 262  | 5000   | 1.79 | 22.322 | 13.6 | 0.0282 | 14.2 | 0.00457 | 3.9 | 0.278 | 29.4 | 1.2 | 28.2 | 3.9 | 67.6  | 332.2 | 56.5   |
| FishC 8  | 1796 | 117931 | 1.05 | 20.708 | 5.4  | 0.0299 | 6.2  | 0.0045  | 3   | 0.483 | 28.9 | 0.9 | 29.9 | 1.8 | 112.4 | 127.6 | 74.3   |
| FishC 9  | 920  | 5000   | 1.86 | 19.356 | 13.8 | 0.0317 | 14.4 | 0.00445 | 4.3 | 0.296 | 28.6 | 1.2 | 31.7 | 4.5 | 269.5 | 315.9 | 89.4   |
