# Supplementary material for: Increased accuracy and precision in igneous and detrital zircon geochronology using CA-LA-ICPMS
Source: Copernicus journal article supplement (doi:10.5194/gchron-2023-20), 2023-08-25
Supplement: Supplementary file 18 [file gchron-2023-20-supplement.zip]

### **Detrital zircon U-Pb zircon geochronology data (CA-ID-TIMS and (CA)LA-ICPMS)**

This section includes raw data for concordant and discordant U-Pb zircon geochronology for detrital zircon samples NM8A and Rora Med. Tables S16-S17 contain all LA-ICPMS and CA-LA-ICPMS data for Rora Med and Tables S18-S19 contain all LA-ICPMS and CA-LA-ICPMS data for NM8A.
