# Supplementary material for: Increased accuracy and precision in igneous and detrital zircon geochronology using CA-LA-ICPMS
Source: Copernicus journal article supplement (doi:10.5194/gchron-2023-20), 2023-08-25
Supplement: Supplementary file 20 [file gchron-2023-20-supplement.zip]

**TABLE S17: RORA MED (CA) LA-ICPMS U-Pb ZIRCON GEOCHRONOLOGY**

| Zircon #          | Composition |             |       |             |        |            |        |            |        |             |            |         |            | Ages    |             |    |      | 1σ | % Disc. |
|-------------------|-------------|-------------|-------|-------------|--------|------------|--------|------------|--------|-------------|------------|---------|------------|---------|-------------|----|------|----|---------|
|                   | U (ppm)     | 206Pb/204Pb | U/Th  | 206Pb/207Pb | 1σ (%) | 207Pb/235U | 1σ (%) | 206Pb/238U | 1σ (%) | Error Corr. | 206Pb/238U | 1σ (Ma) | 207Pb/235U | 1σ (Ma) | 206Pb/207Pb |    |      |    |         |
| Run 1 (Sept 2021) |             |             |       |             |        |            |        |            |        |             |            |         |            |         |             |    |      |    |         |
| Spot 2            | 48          | 10963.2     | 0.776 | 4.2         | 1.2    | 20.1       | 2.4    | 0.6        | 2.06   | 0.86866     | 3029.2     | 49.7    | 3096.0     | 22.9    | 3139.6      | 19 | 3.5  |    |         |
| Spot 3            | 295         | 47780.6     | 1.383 | 7.8         | 1.0    | 7.0        | 1.6    | 0.4        | 1.28   | 0.78575     | 2125.9     | 23.2    | 2108.7     | 14.5    | 2091.9      | 18 | -1.6 |    |         |
| Spot 4            | 136         | 32009.2     | 1.869 | 7.3         | 0.8    | 8.1        | 1.3    | 0.4        | 1.08   | 0.80459     | 2259.7     | 20.5    | 2237.2     | 12.1    | 2216.6      | 14 | -1.9 |    |         |
| Spot 5            | 157         | 12228.3     | 2.097 | 7.3         | 0.9    | 7.4        | 1.7    | 0.4        | 1.47   | 0.86187     | 2119.3     | 26.5    | 2159.6     | 15.2    | 2198.1      | 15 | 3.6  |    |         |
| Spot 6            | 129         | 6920.9      | 2.178 | 5.5         | 0.8    | 13.1       | 1.4    | 0.5        | 1.14   | 0.82069     | 2682.0     | 25.0    | 2685.4     | 13.1    | 2687.9      | 13 | 0.2  |    |         |
| Spot 7            | 106         | 10770.0     | 2.438 | 5.4         | 0.7    | 13.2       | 1.5    | 0.5        | 1.30   | 0.87628     | 2668.0     | 28.3    | 2694.8     | 14.0    | 2714.9      | 12 | 1.7  |    |         |
| Spot 8            | 79          | 7498.6      | 4.468 | 7.5         | 1.0    | 7.1        | 2.1    | 0.4        | 1.72   | 0.81560     | 2119.6     | 31.0    | 2128.0     | 18.7    | 2136.1      | 21 | 0.8  |    |         |
| Spot 10           | 166         | 20259.1     | 2.807 | 7.5         | 0.7    | 7.6        | 1.3    | 0.4        | 1.08   | 0.84288     | 2202.3     | 20.2    | 2183.2     | 11.5    | 2165.2      | 12 | -1.7 |    |         |
| Spot 11           | 144         | 32526.0     | 1.186 | 7.7         | 0.8    | 6.9        | 1.4    | 0.4        | 1.17   | 0.83681     | 2082.4     | 20.8    | 2099.0     | 12.4    | 2115.2      | 13 | 1.5  |    |         |
| Spot 12           | 49          | 8342.3      | 1.496 | 7.7         | 1.2    | 6.7        | 2.0    | 0.4        | 1.47   | 0.75214     | 2019.6     | 25.5    | 2066.3     | 17.3    | 2113.2      | 23 | 4.4  |    |         |
| Spot 13           | 281         | 38743.0     | 2.089 | 5.5         | 0.8    | 13.6       | 1.5    | 0.5        | 1.27   | 0.84060     | 2741.8     | 28.3    | 2722.7     | 14.3    | 2708.6      | 13 | -1.2 |    |         |
| Spot 15           | 337         | 50228.3     | 3.093 | 5.0         | 0.8    | 16.1       | 1.6    | 0.6        | 1.32   | 0.84284     | 2911.4     | 30.9    | 2882.5     | 15.0    | 2862.4      | 14 | -1.7 |    |         |
| Spot 16           | 237         | 28606.7     | 2.260 | 5.5         | 0.7    | 13.5       | 1.1    | 0.5        | 0.89   | 0.79362     | 2735.3     | 19.8    | 2713.4     | 10.6    | 2697.1      | 11 | -1.4 |    |         |
| Spot 17           | 196         | 19070.5     | 1.073 | 5.3         | 0.7    | 12.9       | 2.9    | 0.5        | 2.79   | 0.96669     | 2573.6     | 59.3    | 2669.3     | 27.2    | 2742.6      | 12 | 6.2  |    |         |
| Spot 18           | 47          | 8742.2      | 2.524 | 7.1         | 1.1    | 7.3        | 1.7    | 0.4        | 1.24   | 0.73130     | 2052.7     | 21.9    | 2149.1     | 15.2    | 2242.5      | 20 | 8.5  |    |         |
| Spot 19           | 178         | 751003.6    | 1.015 | 5.7         | 0.9    | 12.7       | 1.7    | 0.5        | 1.40   | 0.84560     | 2662.2     | 30.6    | 2656.5     | 15.6    | 2652.2      | 15 | -0.4 |    |         |
| Spot 20           | 172         | 35814.9     | 2.117 | 5.5         | 0.9    | 13.2       | 1.5    | 0.5        | 1.17   | 0.79205     | 2694.1     | 25.8    | 2694.0     | 14.0    | 2693.8      | 15 | 0.0  |    |         |
| Spot 22           | 74          | 29215.3     | 0.967 | 7.5         | 1.2    | 7.0        | 1.6    | 0.4        | 1.08   | 0.66779     | 2045.2     | 18.8    | 2105.6     | 14.3    | 2165.1      | 21 | 5.5  |    |         |
| Spot 23           | 140         | 23762.5     | 1.053 | 7.5         | 0.7    | 7.4        | 1.5    | 0.4        | 1.26   | 0.85792     | 2158.4     | 23.1    | 2163.5     | 13.1    | 2168.3      | 13 | 0.5  |    |         |
| Spot 24           | 257         | 3216820.0   | 1.911 | 3.6         | 0.6    | 27.8       | 1.2    | 0.7        | 1.08   | 0.86943     | 3469.8     | 29.1    | 3412.0     | 12.2    | 3378.3      | 10 | -2.7 |    |         |
| Spot 25           | 98          | 98864.6     | 2.219 | 7.5         | 0.8    | 7.2        | 1.2    | 0.4        | 0.83   | 0.71761     | 2085.1     | 14.8    | 2134.7     | 10.3    | 2182.9      | 14 | 4.5  |    |         |
| Spot 27           | 38          | 1226.6      | 3.123 | 7.5         | 1.4    | 6.3        | 3.4    | 0.4        | 3.07   | 0.90532     | 1997.6     | 52.8    | 2014.5     | 29.8    | 2031.8      | 26 | 1.7  |    |         |
| Spot 28           | 179         | 30154.8     | 2.547 | 7.5         | 1.0    | 7.2        | 2.0    | 0.4        | 1.78   | 0.86954     | 2104.2     | 32.0    | 2136.8     | 18.3    | 2168.4      | 18 | 3.0  |    |         |
| Spot 29           | 73          | 10708.8     | 1.959 | 7.2         | 0.9    | 7.5        | 1.5    | 0.4        | 1.22   | 0.81247     | 2110.6     | 22.0    | 2168.0     | 13.5    | 2222.8      | 15 | 5.0  |    |         |
| Spot 31           | 205         | 13771.8     | 2.463 | 5.4         | 0.8    | 13.6       | 1.4    | 0.5        | 1.16   | 0.83417     | 2731.4     | 25.8    | 2723.1     | 13.2    | 2717.0      | 13 | -0.5 |    |         |
| Spot 32           | 377         | 105000.8    | 4.005 | 7.7         | 0.8    | 7.0        | 1.2    | 0.4        | 0.95   | 0.76608     | 2105.5     | 17.1    | 2115.2     | 11.1    | 2124.7      | 14 | 0.9  |    |         |
| Spot 33           | 209         | 18718.3     | 1.480 | 7.8         | 0.9    | 6.8        | 1.5    | 0.4        | 1.18   | 0.80567     | 2064.3     | 20.8    | 2085.3     | 13.0    | 2106.2      | 15 | 2.0  |    |         |
| Spot 34           | 218         | 52580.1     | 2.192 | 5.5         | 0.8    | 13.8       | 1.4    | 0.5        | 1.09   | 0.79727     | 2804.3     | 24.8    | 2738.4     | 12.9    | 2690.2      | 14 | -4.2 |    |         |
| Spot 35           | 177         | 20877.0     | 2.738 | 5.5         | 0.9    | 13.0       | 1.5    | 0.5        | 1.21   | 0.81058     | 2649.2     | 26.3    | 2679.1     | 14.1    | 2701.7      | 14 | 1.9  |    |         |
| Spot 36           | 55          | 8711.3      | 1.887 | 5.5         | 1.4    | 12.3       | 5.9    | 0.5        | 5.69   | 0.97075     | 2560.5     | 120.1   | 2627.8     | 55.0    | 2680.0      | 23 | 4.5  |    |         |
| Spot 37           | 291         | 42925.7     | 2.022 | 5.5         | 0.9    | 13.5       | 1.5    | 0.5        | 1.20   | 0.79714     | 2738.0     | 26.8    | 2712.2     | 14.2    | 2693.0      | 15 | -1.7 |    |         |
| Spot 38           | 383         | 114434.3    | 2.379 | 5.6         | 1.0    | 13.3       | 1.6    | 0.5        | 1.25   | 0.79380     | 2741.0     | 27.8    | 2697.9     | 14.8    | 2665.8      | 16 | -2.8 |    |         |
| Spot 39           | 52          | 7776.3      | 1.504 | 6.9         | 1.7    | 8.1        | 2.3    | 0.4        | 1.56   | 0.67055     | 2180.3     | 28.9    | 2241.1     | 21.0    | 2297.2      | 30 | 5.1  |    |         |
| Spot 40           | 165         | 31830.8     | 1.463 | 7.7         | 1.0    | 7.2        | 1.9    | 0.4        | 1.60   | 0.85371     | 2142.6     | 29.1    | 2131.1     | 16.7    | 2119.9      | 17 | -1.1 |    |         |
| Spot 41           | 322         | 139053.8    | 2.065 | 5.7         | 0.8    | 12.9       | 1.3    | 0.5        | 1.05   | 0.77733     | 2725.5     | 23.3    | 2674.4     | 12.7    | 2636.0      | 14 | -3.4 |    |         |
| Spot 42           | 135         | 82919.1     | 1.029 | 7.7         | 0.9    | 7.2        | 1.5    | 0.4        | 1.23   | 0.81105     | 2141.0     | 22.5    | 2132.5     | 13.6    | 2124.4      | 16 | -0.8 |    |         |
| Spot 43           | 208         | 32431.9     | 1.766 | 8.7         | 1.0    | 5.5        | 1.7    | 0.3        | 1.36   | 0.80651     | 1909.9     | 22.4    | 1901.4     | 14.4    | 1892.1      | 18 | -0.9 |    |         |
| Spot 44           | 148         | 11309.9     | 1.401 | 8.2         | 1.0    | 6.1        | 1.5    | 0.4        | 1.15   | 0.75291     | 1966.3     | 19.5    | 1984.0     | 13.3    | 2002.5      | 18 | 1.8  |    |         |
| Spot 45           | 110         | 13167.7     | 2.761 | 6.9         | 1.0    | 8.6        | 1.8    | 0.4        | 1.45   | 0.81993     | 2272.9     | 27.8    | 2293.1     | 16.1    | 2311.1      | 17 | 1.7  |    |         |
| Spot 46           | 358         | 87070.6     | 1.696 | 4.1         | 0.6    | 22.2       | 1.5    | 0.7        | 1.40   | 0.90990     | 3242.7     | 35.8    | 3193.8     | 15.0    | 3163.3      | 10 | -2.5 |    |         |

|         |     |          |       |     |     |      |     |     |      |         |        |      |        |      |        |    |      |
|---------|-----|----------|-------|-----|-----|------|-----|-----|------|---------|--------|------|--------|------|--------|----|------|
| Spot 47 | 162 | 148967.1 | 5.413 | 7.1 | 0.7 | 8.4  | 1.5 | 0.4 | 1.28 | 0.87520 | 2304.7 | 24.8 | 2279.0 | 13.3 | 2256.0 | 12 | -2.2 |
| Spot 48 | 132 | 39025.1  | 2.166 | 7.7 | 0.9 | 7.0  | 1.8 | 0.4 | 1.53 | 0.85944 | 2104.7 | 27.6 | 2107.8 | 15.9 | 2110.8 | 16 | 0.3  |
| Spot 49 | 24  | 6402.5   | 0.713 | 7.1 | 1.4 | 7.6  | 2.9 | 0.4 | 2.42 | 0.83784 | 2130.4 | 44.0 | 2189.7 | 26.0 | 2245.6 | 27 | 5.1  |
| Spot 50 | 56  | 21585.7  | 2.547 | 4.7 | 1.1 | 16.7 | 2.0 | 0.6 | 1.73 | 0.84849 | 2860.4 | 39.9 | 2916.0 | 19.5 | 2954.7 | 17 | 3.2  |
| Spot 51 | 162 | 26079.9  | 1.098 | 7.5 | 0.8 | 7.3  | 1.4 | 0.4 | 1.17 | 0.83418 | 2132.6 | 21.3 | 2148.0 | 12.6 | 2162.7 | 14 | 1.4  |
| Spot 52 | 177 | 88757.4  | 1.052 | 8.3 | 0.9 | 6.2  | 1.3 | 0.4 | 1.03 | 0.76749 | 2009.2 | 17.7 | 2000.4 | 11.7 | 1991.4 | 15 | -0.9 |
| Spot 53 | 144 | 56919.7  | 2.397 | 7.4 | 1.1 | 7.5  | 1.8 | 0.4 | 1.49 | 0.81708 | 2151.3 | 27.2 | 2171.3 | 16.3 | 2190.1 | 18 | 1.8  |
| Spot 54 | 139 | 18529.7  | 2.691 | 7.6 | 0.7 | 7.2  | 1.3 | 0.4 | 1.08 | 0.83789 | 2129.5 | 19.6 | 2138.8 | 11.5 | 2147.7 | 12 | 0.8  |
| Spot 55 | 182 | 39805.9  | 2.321 | 5.6 | 0.9 | 13.6 | 1.5 | 0.5 | 1.20 | 0.81428 | 2788.2 | 27.2 | 2719.3 | 14.0 | 2668.5 | 14 | -4.5 |
| Spot 56 | 263 | 189936.0 | 1.246 | 8.6 | 0.9 | 5.5  | 1.6 | 0.3 | 1.40 | 0.84854 | 1878.7 | 22.8 | 1901.0 | 14.2 | 1925.5 | 16 | 2.4  |
| Spot 57 | 181 | 50831.2  | 2.060 | 8.2 | 1.1 | 6.2  | 1.7 | 0.4 | 1.26 | 0.75295 | 2001.9 | 21.6 | 2003.5 | 14.6 | 2005.1 | 20 | 0.2  |
| Spot 58 | 36  | 5721.4   | 1.178 | 7.5 | 1.8 | 7.4  | 2.6 | 0.4 | 1.81 | 0.70862 | 2204.1 | 33.8 | 2165.3 | 22.9 | 2128.6 | 32 | -3.5 |
| Spot 59 | 152 | 63685.8  | 1.055 | 5.0 | 0.8 | 16.1 | 1.3 | 0.6 | 1.08 | 0.81502 | 2932.1 | 25.6 | 2879.9 | 12.7 | 2843.6 | 13 | -3.1 |
| Spot 60 | 71  | 18423.6  | 1.654 | 7.1 | 1.5 | 7.6  | 2.3 | 0.4 | 1.82 | 0.78036 | 2108.0 | 32.8 | 2181.4 | 20.9 | 2251.0 | 25 | 6.4  |
| Spot 61 | 195 | 729974.6 | 2.709 | 7.6 | 1.0 | 7.4  | 1.5 | 0.4 | 1.16 | 0.76079 | 2163.7 | 21.4 | 2158.2 | 13.7 | 2152.9 | 17 | -0.5 |
| Spot 62 | 179 | 48205.7  | 2.595 | 5.5 | 0.6 | 13.5 | 1.5 | 0.5 | 1.31 | 0.90228 | 2756.1 | 29.5 | 2716.2 | 13.8 | 2686.6 | 10 | -2.6 |
| Spot 63 | 132 | 8102.3   | 0.975 | 5.4 | 0.9 | 13.5 | 1.4 | 0.5 | 1.13 | 0.79608 | 2723.7 | 25.2 | 2713.2 | 13.5 | 2705.4 | 14 | -0.7 |
| Spot 64 | 214 | 23953.0  | 2.042 | 5.5 | 0.7 | 13.9 | 1.5 | 0.5 | 1.29 | 0.87058 | 2804.7 | 29.3 | 2745.0 | 14.0 | 2701.4 | 12 | -3.8 |
| Spot 65 | 194 | 10253.7  | 1.467 | 8.9 | 1.4 | 5.4  | 2.4 | 0.3 | 1.95 | 0.81109 | 1924.3 | 32.4 | 1889.9 | 20.6 | 1852.4 | 25 | -3.9 |
| Spot 66 | 56  | 27483.7  | 2.225 | 6.3 | 1.3 | 10.2 | 2.1 | 0.5 | 1.74 | 0.80759 | 2452.9 | 35.4 | 2453.6 | 19.9 | 2454.2 | 21 | 0.1  |
| Spot 68 | 312 | 36367.6  | 1.234 | 7.4 | 0.9 | 7.7  | 1.8 | 0.4 | 1.62 | 0.87913 | 2205.5 | 30.2 | 2195.8 | 16.5 | 2186.6 | 15 | -0.9 |
| Spot 69 | 36  | 5020.6   | 1.036 | 5.4 | 1.4 | 12.9 | 2.2 | 0.5 | 1.73 | 0.77149 | 2623.2 | 37.2 | 2674.9 | 21.1 | 2714.2 | 23 | 3.4  |
| Spot 70 | 140 | 32692.7  | 1.354 | 7.3 | 0.9 | 7.8  | 1.5 | 0.4 | 1.24 | 0.81664 | 2206.0 | 23.3 | 2207.9 | 13.7 | 2209.7 | 15 | 0.2  |
| Spot 71 | 83  | 10025.0  | 2.920 | 8.7 | 1.2 | 5.4  | 1.6 | 0.3 | 1.09 | 0.67319 | 1880.9 | 17.8 | 1889.5 | 13.9 | 1899.0 | 22 | 1.0  |
| Spot 72 | 291 | 35220.2  | 1.953 | 5.6 | 0.9 | 13.0 | 1.5 | 0.5 | 1.24 | 0.80439 | 2712.3 | 27.4 | 2678.3 | 14.5 | 2652.8 | 15 | -2.2 |
| Spot 73 | 77  | 11503.9  | 2.564 | 7.4 | 0.9 | 7.3  | 1.7 | 0.4 | 1.38 | 0.81734 | 2127.5 | 25.0 | 2150.2 | 15.1 | 2172.0 | 17 | 2.0  |
| Spot 74 | 119 | 40951.9  | 0.916 | 5.4 | 0.8 | 13.6 | 1.6 | 0.5 | 1.35 | 0.85996 | 2711.8 | 29.9 | 2720.2 | 14.9 | 2726.5 | 13 | 0.5  |
| Spot 75 | 172 | 113508.7 | 3.865 | 6.0 | 0.7 | 11.8 | 1.4 | 0.5 | 1.14 | 0.83603 | 2626.3 | 24.6 | 2591.4 | 12.8 | 2564.3 | 13 | -2.4 |
| Spot 76 | 297 | 58388.7  | 5.274 | 5.2 | 0.8 | 15.2 | 1.4 | 0.6 | 1.17 | 0.81678 | 2897.8 | 27.3 | 2829.5 | 13.7 | 2781.2 | 14 | -4.2 |
| Spot 77 | 132 | 12687.0  | 2.239 | 7.5 | 1.1 | 7.4  | 1.8 | 0.4 | 1.42 | 0.78045 | 2170.0 | 26.1 | 2161.3 | 16.2 | 2153.1 | 20 | -0.8 |
| Spot 78 | 119 | 7993.6   | 4.399 | 7.7 | 0.9 | 6.9  | 2.0 | 0.4 | 1.74 | 0.88950 | 2100.7 | 31.2 | 2099.2 | 17.4 | 2097.7 | 16 | -0.1 |
| Spot 79 | 213 | 137337.4 | 3.409 | 5.6 | 1.1 | 13.2 | 1.7 | 0.5 | 1.37 | 0.79019 | 2758.7 | 30.8 | 2697.2 | 16.4 | 2651.4 | 18 | -4.0 |
| Spot 80 | 59  | 15834.6  | 2.499 | 7.3 | 1.2 | 7.5  | 1.9 | 0.4 | 1.52 | 0.79621 | 2134.9 | 27.7 | 2173.4 | 17.2 | 2210.0 | 20 | 3.4  |
| Spot 81 | 91  | 17111.8  | 2.566 | 7.7 | 0.9 | 7.1  | 1.7 | 0.4 | 1.39 | 0.84123 | 2133.7 | 25.3 | 2122.0 | 14.7 | 2110.8 | 16 | -1.1 |
| Spot 82 | 108 | 22187.6  | 2.239 | 7.8 | 0.9 | 6.9  | 1.7 | 0.4 | 1.52 | 0.86992 | 2103.1 | 27.3 | 2102.3 | 15.5 | 2101.5 | 15 | -0.1 |
| Spot 83 | 151 | 22920.2  | 1.832 | 7.5 | 0.9 | 7.2  | 2.5 | 0.4 | 2.32 | 0.93639 | 2114.1 | 41.8 | 2137.1 | 22.1 | 2159.2 | 15 | 2.1  |
| Spot 84 | 87  | 23520.3  | 2.254 | 7.2 | 0.7 | 7.8  | 1.4 | 0.4 | 1.20 | 0.86954 | 2189.7 | 22.2 | 2210.1 | 12.4 | 2229.1 | 12 | 1.8  |
| Spot 85 | 263 | 18819.7  | 1.299 | 8.7 | 1.0 | 5.4  | 2.5 | 0.3 | 2.26 | 0.91311 | 1860.2 | 36.5 | 1878.3 | 21.2 | 1898.5 | 18 | 2.0  |
| Spot 86 | 117 | 23349.4  | 1.436 | 7.4 | 1.0 | 7.7  | 1.8 | 0.4 | 1.53 | 0.84373 | 2217.5 | 28.6 | 2200.4 | 16.3 | 2184.5 | 17 | -1.5 |
| Spot 87 | 69  | 12155.5  | 1.875 | 5.3 | 1.2 | 12.8 | 2.8 | 0.5 | 2.48 | 0.89210 | 2557.4 | 52.4 | 2665.8 | 26.2 | 2749.1 | 21 | 7.0  |
| Spot 88 | 88  | 110469.0 | 2.741 | 7.3 | 0.8 | 7.1  | 2.8 | 0.4 | 2.70 | 0.95761 | 2040.2 | 47.2 | 2129.8 | 25.1 | 2217.4 | 14 | 8.0  |
| Spot 89 | 259 | 32204.5  | 1.568 | 7.5 | 1.1 | 7.4  | 1.7 | 0.4 | 1.27 | 0.76484 | 2148.9 | 23.2 | 2156.2 | 14.9 | 2163.0 | 19 | 0.7  |
| Spot 90 | 143 | 271135.4 | 2.098 | 7.7 | 0.8 | 7.0  | 1.3 | 0.4 | 1.05 | 0.79587 | 2119.0 | 18.9 | 2114.5 | 11.7 | 2110.2 | 14 | -0.4 |

|          |     |           |       |     |     |      |     |     |      |         |        |      |        |      |        |    |      |
|----------|-----|-----------|-------|-----|-----|------|-----|-----|------|---------|--------|------|--------|------|--------|----|------|
| Spot 91  | 154 | 21546.8   | 2.076 | 5.5 | 0.9 | 13.2 | 1.9 | 0.5 | 1.65 | 0.87813 | 2688.8 | 36.3 | 2695.9 | 17.8 | 2701.3 | 15 | 0.5  |
| Spot 92  | 126 | 13674.7   | 1.951 | 7.5 | 1.0 | 7.1  | 1.9 | 0.4 | 1.65 | 0.86075 | 2101.6 | 29.6 | 2126.5 | 17.0 | 2150.7 | 17 | 2.3  |
| Spot 93  | 128 | 1734243.2 | 1.488 | 8.2 | 1.0 | 6.2  | 1.6 | 0.4 | 1.33 | 0.80520 | 2003.8 | 22.9 | 2009.6 | 14.4 | 2015.5 | 17 | 0.6  |
| Spot 94  | 138 | 25366.2   | 1.425 | 7.0 | 0.7 | 8.4  | 1.9 | 0.4 | 1.77 | 0.92701 | 2257.1 | 33.7 | 2273.4 | 17.3 | 2288.0 | 12 | 1.4  |
| Spot 95  | 248 | 17396.0   | 2.061 | 5.5 | 0.7 | 13.4 | 1.7 | 0.5 | 1.53 | 0.91650 | 2727.4 | 34.0 | 2709.3 | 15.8 | 2695.9 | 11 | -1.2 |
| Spot 96  | 101 | 23188.2   | 2.968 | 7.9 | 3.3 | 6.8  | 5.1 | 0.4 | 3.93 | 0.76605 | 2098.1 | 70.5 | 2084.1 | 45.5 | 2070.3 | 58 | -1.3 |
| Spot 97  | 162 | 9474.5    | 1.378 | 8.6 | 0.8 | 5.6  | 1.5 | 0.4 | 1.24 | 0.83211 | 1941.5 | 20.7 | 1923.1 | 12.8 | 1903.3 | 15 | -2.0 |
| Spot 98  | 118 | 56818.3   | 1.459 | 7.5 | 0.9 | 7.5  | 1.6 | 0.4 | 1.32 | 0.83665 | 2166.8 | 24.3 | 2169.1 | 14.1 | 2171.3 | 15 | 0.2  |
| Spot 99  | 47  | 4334.4    | 1.550 | 6.7 | 1.1 | 8.7  | 1.6 | 0.4 | 1.13 | 0.70598 | 2275.4 | 21.7 | 2302.2 | 14.6 | 2326.1 | 19 | 2.2  |
| Spot 100 | 162 | 13649.6   | 2.516 | 5.5 | 0.8 | 13.1 | 1.3 | 0.5 | 0.98 | 0.76527 | 2687.5 | 21.6 | 2684.8 | 12.1 | 2682.8 | 14 | -0.2 |
| Spot 101 | 194 | 20187.0   | 2.257 | 6.9 | 1.0 | 7.3  | 4.0 | 0.4 | 3.87 | 0.96706 | 1988.2 | 66.1 | 2145.6 | 35.7 | 2299.9 | 17 | 13.6 |
| Spot 102 | 159 | 19898.0   | 1.220 | 7.5 | 0.8 | 7.3  | 1.5 | 0.4 | 1.28 | 0.83550 | 2134.5 | 23.2 | 2144.5 | 13.7 | 2154.0 | 15 | 0.9  |
| Spot 103 | 194 | 919824.4  | 2.909 | 7.4 | 0.8 | 7.7  | 1.4 | 0.4 | 1.10 | 0.79178 | 2207.6 | 20.5 | 2194.4 | 12.5 | 2182.0 | 15 | -1.2 |
| Spot 104 | 345 | 50976.4   | 1.251 | 4.7 | 0.8 | 16.2 | 1.6 | 0.5 | 1.42 | 0.88189 | 2782.8 | 32.0 | 2890.7 | 15.4 | 2966.8 | 12 | 6.2  |
| Spot 105 | 183 | 44527.7   | 3.101 | 7.5 | 0.8 | 7.3  | 1.2 | 0.4 | 0.87 | 0.72457 | 2135.4 | 15.7 | 2147.5 | 10.7 | 2159.1 | 14 | 1.1  |
| Spot 106 | 144 | 36558.4   | 3.288 | 7.4 | 0.8 | 7.3  | 1.5 | 0.4 | 1.21 | 0.82412 | 2103.1 | 21.8 | 2145.9 | 13.1 | 2187.1 | 15 | 3.8  |
| Spot 107 | 244 | 67672.6   | 2.031 | 5.5 | 0.7 | 13.3 | 1.6 | 0.5 | 1.39 | 0.88036 | 2711.7 | 30.8 | 2698.0 | 14.9 | 2687.8 | 12 | -0.9 |
| Spot 108 | 77  | 18597.5   | 2.827 | 7.5 | 1.0 | 7.0  | 1.7 | 0.4 | 1.41 | 0.80801 | 2072.1 | 25.0 | 2117.0 | 15.5 | 2160.8 | 18 | 4.1  |
| Spot 109 | 155 | 42765.1   | 3.703 | 7.6 | 0.8 | 7.1  | 1.8 | 0.4 | 1.60 | 0.89904 | 2101.2 | 28.8 | 2126.2 | 15.9 | 2150.4 | 14 | 2.3  |
| Spot 110 | 108 | 8292.9    | 2.039 | 7.4 | 0.8 | 7.1  | 1.5 | 0.4 | 1.22 | 0.80066 | 2066.7 | 21.5 | 2119.2 | 13.5 | 2170.6 | 16 | 4.8  |
| Spot 111 | 98  | 143543.0  | 2.845 | 7.6 | 0.9 | 7.1  | 1.8 | 0.4 | 1.51 | 0.85104 | 2098.3 | 27.1 | 2119.2 | 15.8 | 2139.5 | 16 | 1.9  |
| Spot 112 | 290 | 36731.7   | 2.097 | 5.5 | 0.8 | 13.2 | 1.7 | 0.5 | 1.55 | 0.88922 | 2675.7 | 33.9 | 2691.6 | 16.4 | 2703.5 | 13 | 1.0  |
| Spot 113 | 174 | 78526.7   | 1.950 | 5.6 | 3.2 | 13.2 | 4.7 | 0.5 | 3.43 | 0.72754 | 2745.5 | 76.7 | 2693.6 | 44.5 | 2654.8 | 54 | -3.4 |
| Spot 114 | 285 | 39759.0   | 1.488 | 7.7 | 0.7 | 6.9  | 1.4 | 0.4 | 1.16 | 0.84744 | 2075.2 | 20.5 | 2094.9 | 12.1 | 2114.3 | 13 | 1.9  |
| Spot 115 | 75  | 4683.1    | 2.926 | 7.7 | 1.4 | 5.4  | 4.0 | 0.3 | 3.76 | 0.93452 | 1721.9 | 56.8 | 1892.7 | 34.5 | 2085.6 | 25 | 17.4 |
| Spot 116 | 90  | 8951.5    | 0.929 | 7.7 | 0.9 | 7.0  | 1.9 | 0.4 | 1.65 | 0.86742 | 2131.6 | 30.0 | 2116.2 | 17.0 | 2101.3 | 17 | -1.4 |
| Spot 117 | 124 | 37655.7   | 2.412 | 5.1 | 0.9 | 14.2 | 1.3 | 0.5 | 0.87 | 0.69270 | 2702.5 | 19.3 | 2760.6 | 11.9 | 2803.4 | 15 | 3.6  |
| Spot 118 | 290 | 40991.7   | 1.934 | 5.5 | 1.1 | 13.5 | 1.7 | 0.5 | 1.35 | 0.78905 | 2724.1 | 30.0 | 2711.8 | 16.2 | 2702.7 | 17 | -0.8 |
| Spot 119 | 377 | 106054.5  | 4.351 | 7.6 | 0.9 | 7.2  | 1.6 | 0.4 | 1.35 | 0.83835 | 2121.4 | 24.4 | 2132.3 | 14.4 | 2142.8 | 15 | 1.0  |
| Spot 120 | 107 | 31407.9   | 1.108 | 8.2 | 1.3 | 6.0  | 1.9 | 0.4 | 1.40 | 0.73874 | 1936.2 | 23.4 | 1969.6 | 16.5 | 2004.9 | 23 | 3.4  |
| Spot 121 | 154 | 16123.7   | 2.405 | 7.5 | 0.8 | 7.5  | 1.3 | 0.4 | 1.06 | 0.79014 | 2180.1 | 19.7 | 2175.5 | 12.1 | 2171.1 | 14 | -0.4 |
| Spot 122 | 74  | 29017.4   | 0.743 | 7.2 | 0.9 | 7.7  | 1.7 | 0.4 | 1.42 | 0.83371 | 2158.0 | 26.1 | 2196.4 | 15.3 | 2232.4 | 16 | 3.3  |
| Spot 123 | 212 | 48119.8   | 2.596 | 5.6 | 0.8 | 13.2 | 1.5 | 0.5 | 1.29 | 0.86324 | 2711.8 | 28.6 | 2692.6 | 14.1 | 2678.2 | 12 | -1.3 |
| Spot 125 | 168 | 1050881.9 | 1.150 | 7.6 | 1.1 | 7.1  | 1.6 | 0.4 | 1.17 | 0.72876 | 2113.2 | 21.1 | 2129.8 | 14.3 | 2145.8 | 19 | 1.5  |
| Spot 126 | 72  | 9139.9    | 1.236 | 5.1 | 0.8 | 14.2 | 1.6 | 0.5 | 1.33 | 0.85975 | 2709.6 | 29.5 | 2764.0 | 14.7 | 2804.0 | 13 | 3.4  |
| Spot 127 | 149 | 18659.7   | 0.807 | 7.4 | 0.8 | 7.4  | 1.4 | 0.4 | 1.15 | 0.80406 | 2126.7 | 20.8 | 2158.3 | 12.8 | 2188.5 | 15 | 2.8  |
| Spot 128 | 177 | 17541.1   | 1.656 | 7.5 | 0.7 | 7.6  | 1.3 | 0.4 | 1.04 | 0.81581 | 2204.1 | 19.5 | 2184.6 | 11.5 | 2166.2 | 13 | -1.7 |
| Spot 129 | 76  | 8203.8    | 2.343 | 7.2 | 1.1 | 7.6  | 1.9 | 0.4 | 1.61 | 0.82598 | 2144.4 | 29.3 | 2184.1 | 17.4 | 2221.5 | 19 | 3.5  |
| Spot 130 | 225 | 35676.0   | 2.509 | 7.7 | 0.9 | 7.0  | 1.5 | 0.4 | 1.24 | 0.81060 | 2092.8 | 22.2 | 2112.8 | 13.6 | 2132.4 | 16 | 1.9  |
| Spot 131 | 170 | 96981.8   | 1.155 | 7.3 | 0.7 | 7.6  | 2.2 | 0.4 | 2.06 | 0.95369 | 2139.5 | 37.5 | 2187.2 | 19.4 | 2232.2 | 11 | 4.2  |
| Spot 132 | 255 | 33768.1   | 2.492 | 5.4 | 0.7 | 12.6 | 2.3 | 0.5 | 2.20 | 0.94874 | 2554.4 | 46.5 | 2647.9 | 21.9 | 2720.0 | 12 | 6.1  |
| Spot 133 | 92  | 17726.3   | 1.303 | 7.8 | 1.0 | 6.6  | 1.9 | 0.4 | 1.69 | 0.86625 | 2021.5 | 29.2 | 2060.2 | 17.2 | 2099.2 | 17 | 3.7  |
| Spot 134 | 160 | 122849.2  | 2.348 | 5.5 | 0.9 | 13.3 | 1.7 | 0.5 | 1.45 | 0.84851 | 2695.5 | 32.0 | 2699.1 | 16.1 | 2701.8 | 15 | 0.2  |

|          |     |           |       |     |     |      |     |     |      |         |        |      |        |      |        |    |      |
|----------|-----|-----------|-------|-----|-----|------|-----|-----|------|---------|--------|------|--------|------|--------|----|------|
| Spot 135 | 180 | 36238.3   | 0.871 | 8.0 | 0.9 | 6.5  | 1.6 | 0.4 | 1.32 | 0.83068 | 2025.0 | 22.9 | 2041.7 | 14.0 | 2058.6 | 16 | 1.6  |
| Spot 136 | 87  | 39790.8   | 1.083 | 7.6 | 1.0 | 6.7  | 2.7 | 0.4 | 2.55 | 0.93411 | 2012.7 | 44.0 | 2078.0 | 24.1 | 2143.3 | 17 | 6.1  |
| Spot 137 | 152 | 18598.8   | 2.039 | 7.6 | 0.7 | 7.1  | 1.3 | 0.4 | 1.16 | 0.86129 | 2113.6 | 20.9 | 2128.3 | 12.0 | 2142.5 | 12 | 1.3  |
| Spot 138 | 84  | 12846.6   | 1.688 | 7.4 | 1.4 | 6.8  | 1.8 | 0.4 | 1.20 | 0.65706 | 1999.1 | 20.6 | 2087.7 | 16.1 | 2176.2 | 24 | 8.1  |
| Spot 139 | 129 | 30853.7   | 2.685 | 7.5 | 1.1 | 7.3  | 1.7 | 0.4 | 1.29 | 0.75746 | 2129.1 | 23.5 | 2148.1 | 15.3 | 2166.3 | 19 | 1.7  |
| Spot 140 | 170 | 18241.4   | 2.108 | 7.1 | 0.9 | 8.0  | 2.3 | 0.4 | 2.11 | 0.91596 | 2199.1 | 39.3 | 2230.1 | 20.8 | 2258.7 | 16 | 2.6  |
| Spot 141 | 231 | 36655.9   | 2.451 | 7.8 | 0.8 | 6.8  | 1.4 | 0.4 | 1.11 | 0.80629 | 2067.5 | 19.6 | 2086.0 | 12.2 | 2104.3 | 14 | 1.7  |
| Spot 142 | 56  | 8240.5    | 1.609 | 8.2 | 1.0 | 6.0  | 1.8 | 0.4 | 1.44 | 0.80874 | 1950.0 | 24.2 | 1968.6 | 15.5 | 1988.2 | 19 | 1.9  |
| Spot 143 | 195 | 27812.0   | 1.998 | 5.5 | 0.8 | 13.0 | 1.6 | 0.5 | 1.37 | 0.85130 | 2651.8 | 29.7 | 2680.9 | 15.2 | 2702.9 | 14 | 1.9  |
| Spot 144 | 108 | 6321.5    | 2.175 | 7.6 | 0.8 | 7.4  | 1.6 | 0.4 | 1.35 | 0.86005 | 2202.6 | 25.2 | 2164.8 | 14.1 | 2129.1 | 14 | -3.5 |
| Spot 145 | 189 | 118340.5  | 2.217 | 5.5 | 0.7 | 13.1 | 1.5 | 0.5 | 1.32 | 0.88236 | 2657.7 | 28.8 | 2687.8 | 14.2 | 2710.5 | 12 | 1.9  |
| Spot 146 | 214 | 29613.2   | 1.027 | 6.4 | 0.8 | 9.9  | 1.5 | 0.5 | 1.31 | 0.84991 | 2397.7 | 26.3 | 2429.2 | 14.3 | 2455.6 | 14 | 2.4  |
| Spot 147 | 113 | 19614.5   | 2.859 | 7.3 | 0.6 | 7.9  | 1.7 | 0.4 | 1.55 | 0.91918 | 2225.9 | 29.1 | 2216.2 | 15.2 | 2207.1 | 12 | -0.9 |
| Spot 148 | 165 | 11926.8   | 2.239 | 8.7 | 0.9 | 5.4  | 1.8 | 0.3 | 1.49 | 0.85096 | 1885.5 | 24.4 | 1892.7 | 15.0 | 1900.7 | 17 | 0.8  |
| Spot 149 | 315 | 69614.2   | 1.996 | 5.5 | 1.0 | 13.3 | 1.6 | 0.5 | 1.22 | 0.77453 | 2719.3 | 27.0 | 2700.0 | 14.8 | 2685.7 | 16 | -1.3 |
| Spot 150 | 180 | 29097.8   | 0.710 | 8.0 | 1.0 | 6.5  | 1.5 | 0.4 | 1.13 | 0.76469 | 2049.2 | 19.9 | 2051.1 | 13.1 | 2052.9 | 17 | 0.2  |
| Spot 151 | 226 | 23001.8   | 2.036 | 8.5 | 0.8 | 5.7  | 1.6 | 0.3 | 1.40 | 0.86386 | 1922.0 | 23.2 | 1937.1 | 14.0 | 1953.4 | 15 | 1.6  |
| Spot 152 | 44  | 3179.9    | 2.088 | 7.7 | 1.1 | 6.6  | 2.4 | 0.4 | 2.10 | 0.88884 | 2028.9 | 36.6 | 2055.9 | 20.9 | 2083.0 | 19 | 2.6  |
| Spot 153 | 51  | 6187.6    | 0.988 | 7.4 | 0.8 | 7.0  | 1.8 | 0.4 | 1.38 | 0.78707 | 2054.8 | 24.3 | 2112.6 | 15.6 | 2169.3 | 19 | 5.3  |
| Spot 154 | 83  | 8350.3    | 1.541 | 8.7 | 1.0 | 5.5  | 1.8 | 0.3 | 1.45 | 0.81235 | 1923.1 | 24.1 | 1904.4 | 15.3 | 1884.1 | 19 | -2.1 |
| Spot 155 | 214 | 33493.8   | 1.099 | 7.7 | 0.8 | 7.3  | 1.7 | 0.4 | 1.55 | 0.89159 | 2172.8 | 28.6 | 2149.3 | 15.5 | 2127.0 | 14 | -2.2 |
| Spot 157 | 29  | 11849.5   | 0.917 | 5.5 | 1.1 | 12.8 | 1.9 | 0.5 | 1.56 | 0.82241 | 2620.2 | 33.6 | 2667.1 | 17.9 | 2702.8 | 18 | 3.1  |
| Spot 158 | 141 | 547592.2  | 0.811 | 7.4 | 0.9 | 7.5  | 1.4 | 0.4 | 1.09 | 0.77086 | 2149.1 | 20.0 | 2177.9 | 12.7 | 2205.1 | 16 | 2.5  |
| Spot 159 | 238 | 279697.2  | 2.163 | 5.5 | 0.5 | 13.5 | 1.3 | 0.5 | 1.21 | 0.91155 | 2732.5 | 27.0 | 2716.6 | 12.6 | 2704.7 | 9  | -1.0 |
| Spot 160 | 162 | 17053.2   | 1.495 | 7.3 | 1.7 | 7.4  | 2.0 | 0.4 | 0.99 | 0.49488 | 2105.3 | 17.8 | 2164.0 | 17.9 | 2220.1 | 30 | 5.2  |
| Spot 161 | 278 | 28379.2   | 2.004 | 5.4 | 0.9 | 13.6 | 1.6 | 0.5 | 1.35 | 0.84316 | 2742.0 | 30.2 | 2725.6 | 15.2 | 2713.5 | 14 | -1.1 |
| Spot 162 | 90  | 11994.2   | 1.910 | 7.3 | 0.9 | 7.7  | 1.5 | 0.4 | 1.23 | 0.80083 | 2191.7 | 22.9 | 2194.2 | 13.8 | 2196.5 | 16 | 0.2  |
| Spot 163 | 144 | 19493.1   | 1.815 | 7.3 | 0.7 | 7.6  | 1.4 | 0.4 | 1.16 | 0.84509 | 2165.8 | 21.3 | 2189.8 | 12.3 | 2212.3 | 13 | 2.1  |
| Spot 164 | 363 | 4210985.7 | 1.958 | 7.8 | 0.9 | 6.9  | 1.5 | 0.4 | 1.13 | 0.77105 | 2071.4 | 20.0 | 2092.4 | 13.0 | 2113.1 | 16 | 2.0  |
| Spot 165 | 116 | 562006.1  | 2.779 | 7.6 | 1.0 | 7.0  | 1.7 | 0.4 | 1.35 | 0.80920 | 2073.4 | 23.9 | 2113.6 | 14.8 | 2153.0 | 17 | 3.7  |
| Spot 166 | 192 | 32603.5   | 1.415 | 8.0 | 0.8 | 6.3  | 3.1 | 0.4 | 2.96 | 0.96544 | 1970.3 | 50.2 | 2014.8 | 26.9 | 2060.7 | 14 | 4.4  |
| Spot 167 | 189 | 51416.2   | 1.859 | 8.5 | 1.0 | 5.6  | 1.4 | 0.3 | 0.93 | 0.67791 | 1889.4 | 15.3 | 1914.1 | 11.9 | 1940.9 | 18 | 2.7  |
| Spot 168 | 57  | 3357.1    | 2.908 | 7.3 | 1.1 | 7.1  | 2.0 | 0.4 | 1.73 | 0.85032 | 2088.4 | 30.9 | 2124.2 | 18.1 | 2159.0 | 19 | 3.3  |
| Spot 169 | 123 | 315469.8  | 0.684 | 8.0 | 1.0 | 6.1  | 2.6 | 0.3 | 2.36 | 0.91852 | 1917.1 | 39.2 | 1990.4 | 22.4 | 2067.4 | 18 | 7.3  |
| Spot 171 | 71  | 190515.8  | 1.952 | 7.8 | 0.9 | 6.9  | 1.6 | 0.4 | 1.29 | 0.82730 | 2077.0 | 23.0 | 2092.9 | 13.9 | 2108.5 | 15 | 1.5  |
| Spot 172 | 200 | 14389.8   | 2.021 | 7.5 | 0.8 | 7.3  | 1.5 | 0.4 | 1.34 | 0.86364 | 2140.5 | 24.3 | 2147.6 | 13.8 | 2154.4 | 14 | 0.6  |
| Spot 174 | 151 | 31537.7   | 1.004 | 7.6 | 1.3 | 7.3  | 3.8 | 0.4 | 3.60 | 0.94411 | 2162.6 | 66.2 | 2148.6 | 34.1 | 2135.3 | 22 | -1.3 |
| Spot 175 | 166 | 62586.9   | 0.995 | 5.2 | 0.6 | 15.4 | 1.2 | 0.6 | 1.00 | 0.84593 | 2905.9 | 23.4 | 2841.9 | 11.3 | 2796.9 | 10 | -3.9 |
| Spot 176 | 196 | 27370.0   | 2.332 | 5.5 | 0.7 | 13.3 | 1.3 | 0.5 | 1.05 | 0.82169 | 2718.9 | 23.3 | 2698.6 | 12.1 | 2683.3 | 12 | -1.3 |
| Spot 177 | 142 | 17456.2   | 0.757 | 8.0 | 1.0 | 6.2  | 1.6 | 0.4 | 1.25 | 0.79274 | 1965.1 | 21.2 | 2011.2 | 13.8 | 2058.9 | 17 | 4.6  |
| Spot 178 | 158 | 28781.2   | 2.043 | 7.6 | 1.0 | 7.1  | 1.6 | 0.4 | 1.33 | 0.80987 | 2099.8 | 23.8 | 2124.6 | 14.6 | 2148.7 | 17 | 2.3  |
| Spot 179 | 107 | 19113.5   | 0.967 | 7.4 | 0.9 | 7.6  | 1.4 | 0.4 | 1.11 | 0.78289 | 2180.2 | 20.5 | 2183.7 | 12.7 | 2187.1 | 15 | 0.3  |
| Spot 180 | 148 | 50250.0   | 1.287 | 7.3 | 0.8 | 7.8  | 1.6 | 0.4 | 1.36 | 0.86489 | 2212.7 | 25.4 | 2211.6 | 14.1 | 2210.6 | 14 | -0.1 |

|          |     |          |       |     |     |      |     |     |      |         |        |      |        |      |        |    |      |
|----------|-----|----------|-------|-----|-----|------|-----|-----|------|---------|--------|------|--------|------|--------|----|------|
| Spot 182 | 350 | 236040.9 | 2.001 | 4.9 | 0.8 | 16.4 | 1.5 | 0.6 | 1.30 | 0.86264 | 2946.3 | 30.6 | 2901.3 | 14.4 | 2870.3 | 12 | -2.6 |
| Spot 183 | 204 | 11247.2  | 2.066 | 7.5 | 0.8 | 7.5  | 1.5 | 0.4 | 1.31 | 0.85632 | 2196.8 | 24.4 | 2174.0 | 13.7 | 2152.6 | 14 | -2.1 |
| Spot 184 | 125 | 13588.9  | 2.004 | 8.6 | 0.9 | 5.5  | 1.7 | 0.3 | 1.39 | 0.82545 | 1894.9 | 22.7 | 1899.8 | 14.4 | 1905.0 | 17 | 0.5  |
| Spot 185 | 242 | 76764.2  | 1.335 | 8.0 | 0.8 | 6.4  | 2.0 | 0.4 | 1.79 | 0.92000 | 2015.3 | 31.1 | 2034.7 | 17.1 | 2054.3 | 14 | 1.9  |
| Spot 187 | 74  | 42160.2  | 1.958 | 7.4 | 0.9 | 7.3  | 1.7 | 0.4 | 1.46 | 0.84475 | 2100.6 | 26.3 | 2149.1 | 15.5 | 2195.8 | 16 | 4.3  |
| Spot 188 | 153 | 17448.3  | 2.422 | 7.1 | 0.9 | 7.9  | 1.8 | 0.4 | 1.55 | 0.86971 | 2183.1 | 28.7 | 2217.9 | 16.1 | 2250.2 | 15 | 3.0  |
| Spot 189 | 161 | 16007.5  | 1.491 | 8.1 | 1.0 | 6.3  | 1.9 | 0.4 | 1.61 | 0.85262 | 2016.3 | 27.9 | 2019.6 | 16.6 | 2022.9 | 17 | 0.3  |
| Spot 190 | 217 | 33050.9  | 1.952 | 6.1 | 1.2 | 10.9 | 1.9 | 0.5 | 1.51 | 0.78053 | 2528.5 | 31.6 | 2517.1 | 18.0 | 2508.0 | 20 | -0.8 |
| Spot 191 | 115 | 18672.8  | 1.701 | 8.4 | 0.9 | 5.7  | 1.6 | 0.3 | 1.25 | 0.79805 | 1887.6 | 20.5 | 1924.6 | 13.5 | 1964.7 | 17 | 3.9  |
| Spot 192 | 192 | 45068.7  | 1.789 | 7.6 | 0.8 | 7.2  | 1.5 | 0.4 | 1.30 | 0.84516 | 2128.7 | 23.6 | 2131.2 | 13.7 | 2133.5 | 14 | 0.2  |
| Spot 193 | 106 | 30741.4  | 2.210 | 7.7 | 0.9 | 6.7  | 2.3 | 0.4 | 2.12 | 0.91897 | 2026.3 | 36.8 | 2071.8 | 20.3 | 2117.3 | 16 | 4.3  |
| Spot 194 | 176 | 14931.7  | 2.217 | 5.5 | 0.7 | 13.0 | 1.6 | 0.5 | 1.42 | 0.89045 | 2664.7 | 31.1 | 2679.1 | 15.1 | 2690.0 | 12 | 0.9  |
| Spot 195 | 146 | 26648.3  | 1.206 | 6.7 | 0.9 | 8.6  | 1.2 | 0.4 | 0.89 | 0.71941 | 2250.6 | 16.9 | 2301.5 | 11.2 | 2346.9 | 15 | 4.1  |
| Spot 196 | 138 | 15706.8  | 1.282 | 7.7 | 0.8 | 6.9  | 1.6 | 0.4 | 1.31 | 0.84703 | 2072.7 | 23.3 | 2096.1 | 13.8 | 2119.1 | 14 | 2.2  |
| Spot 197 | 452 | 185836.9 | 0.724 | 7.8 | 0.9 | 6.7  | 1.4 | 0.4 | 1.08 | 0.78267 | 2058.4 | 19.0 | 2075.9 | 12.2 | 2093.3 | 15 | 1.7  |
| Spot 199 | 185 | 36527.2  | 2.043 | 5.5 | 0.8 | 13.4 | 1.3 | 0.5 | 1.08 | 0.81585 | 2729.6 | 24.1 | 2710.7 | 12.6 | 2696.5 | 13 | -1.2 |
| Spot 200 | 175 | 37013.6  | 2.518 | 5.6 | 0.9 | 13.2 | 1.6 | 0.5 | 1.28 | 0.80720 | 2724.2 | 28.5 | 2691.8 | 15.0 | 2667.6 | 16 | -2.1 |
| Spot 201 | 133 | 9994.6   | 1.860 | 8.6 | 0.8 | 5.0  | 1.3 | 0.3 | 0.98 | 0.75454 | 1743.5 | 14.9 | 1823.9 | 10.9 | 1916.9 | 15 | 9.0  |
| Spot 202 | 263 | 34810.4  | 1.340 | 7.4 | 0.8 | 7.9  | 1.9 | 0.4 | 1.67 | 0.89559 | 2234.3 | 31.6 | 2215.4 | 16.8 | 2198.0 | 14 | -1.6 |
| Spot 203 | 152 | 89943.0  | 2.282 | 5.5 | 0.9 | 13.1 | 1.4 | 0.5 | 1.03 | 0.74319 | 2688.9 | 22.6 | 2688.5 | 13.1 | 2688.3 | 15 | 0.0  |
| Spot 204 | 74  | 13052.7  | 2.248 | 7.2 | 1.3 | 7.5  | 1.8 | 0.4 | 1.24 | 0.68854 | 2112.2 | 22.4 | 2176.1 | 16.2 | 2236.9 | 23 | 5.6  |
| Spot 205 | 303 | 106917.8 | 2.798 | 5.7 | 1.1 | 12.2 | 1.8 | 0.5 | 1.42 | 0.80333 | 2609.1 | 30.6 | 2623.2 | 16.6 | 2634.2 | 18 | 1.0  |
| Spot 206 | 213 | 60985.5  | 0.907 | 7.5 | 1.0 | 7.2  | 1.8 | 0.4 | 1.54 | 0.84152 | 2104.6 | 27.7 | 2133.5 | 16.3 | 2161.4 | 17 | 2.6  |
| Spot 207 | 122 | 29748.5  | 1.831 | 4.7 | 0.8 | 17.6 | 1.5 | 0.6 | 1.22 | 0.82309 | 2975.4 | 29.1 | 2965.9 | 14.2 | 2959.4 | 14 | -0.5 |
| Spot 208 | 84  | 12467.7  | 2.491 | 6.0 | 0.9 | 10.5 | 1.6 | 0.5 | 1.32 | 0.83920 | 2422.0 | 26.6 | 2483.1 | 14.5 | 2533.5 | 14 | 4.4  |
| Spot 209 | 74  | 15342.2  | 8.740 | 7.5 | 1.0 | 7.2  | 1.8 | 0.4 | 1.52 | 0.83102 | 2101.9 | 27.3 | 2134.5 | 16.3 | 2166.0 | 18 | 3.0  |
| Spot 210 | 185 | 15787.2  | 2.839 | 7.6 | 1.3 | 7.3  | 2.3 | 0.4 | 1.84 | 0.81659 | 2165.0 | 33.9 | 2144.6 | 20.1 | 2125.1 | 23 | -1.9 |
| Spot 212 | 104 | 39678.5  | 1.089 | 4.1 | 0.9 | 21.6 | 1.6 | 0.6 | 1.37 | 0.84449 | 3138.2 | 34.1 | 3164.8 | 15.8 | 3181.7 | 14 | 1.4  |
| Spot 213 | 121 | 14914.9  | 1.739 | 8.6 | 1.0 | 5.6  | 1.6 | 0.3 | 1.24 | 0.77005 | 1907.1 | 20.5 | 1910.8 | 13.9 | 1914.8 | 18 | 0.4  |
| Spot 214 | 533 | 55976.5  | 2.217 | 4.8 | 0.8 | 17.2 | 1.8 | 0.6 | 1.54 | 0.87784 | 3006.2 | 36.9 | 2945.2 | 16.8 | 2903.7 | 14 | -3.5 |
| Spot 215 | 135 | 35387.4  | 1.155 | 7.6 | 1.3 | 7.3  | 1.9 | 0.4 | 1.37 | 0.72123 | 2168.6 | 25.2 | 2148.8 | 17.0 | 2129.9 | 23 | -1.8 |
| Spot 216 | 120 | 16727.3  | 2.393 | 7.8 | 0.9 | 6.7  | 1.7 | 0.4 | 1.42 | 0.84179 | 2066.9 | 25.1 | 2077.0 | 14.9 | 2087.1 | 16 | 1.0  |
| Spot 217 | 145 | 231110.9 | 1.213 | 5.0 | 0.9 | 15.8 | 1.4 | 0.6 | 1.04 | 0.76824 | 2869.4 | 24.1 | 2865.6 | 12.9 | 2862.9 | 14 | -0.2 |
| Spot 218 | 218 | 39808.4  | 1.215 | 7.8 | 1.0 | 7.2  | 1.9 | 0.4 | 1.57 | 0.83382 | 2177.0 | 29.0 | 2138.5 | 16.8 | 2101.6 | 18 | -3.6 |
| Spot 219 | 126 | 151936.0 | 1.931 | 7.3 | 0.7 | 7.6  | 1.3 | 0.4 | 1.07 | 0.83244 | 2167.5 | 19.6 | 2185.9 | 11.5 | 2203.3 | 12 | 1.6  |
| Spot 220 | 135 | 7917.4   | 1.746 | 8.6 | 0.9 | 5.5  | 1.8 | 0.3 | 1.54 | 0.87414 | 1905.9 | 25.4 | 1897.6 | 15.1 | 1888.6 | 15 | -0.9 |
| Spot 221 | 105 | 25327.5  | 1.726 | 7.6 | 1.0 | 7.1  | 1.4 | 0.4 | 1.03 | 0.72720 | 2102.5 | 18.5 | 2120.6 | 12.6 | 2138.3 | 17 | 1.7  |
| Spot 222 | 157 | 27927.3  | 2.064 | 7.7 | 0.9 | 6.9  | 1.6 | 0.4 | 1.26 | 0.80088 | 2094.5 | 22.6 | 2102.7 | 14.0 | 2110.8 | 17 | 0.8  |
| Spot 223 | 284 | 20641.3  | 2.100 | 5.4 | 1.1 | 13.3 | 1.6 | 0.5 | 1.15 | 0.73612 | 2703.4 | 25.5 | 2701.6 | 14.8 | 2700.3 | 18 | -0.1 |
| Spot 224 | 177 | 53366.5  | 2.273 | 5.4 | 0.7 | 13.7 | 1.4 | 0.5 | 1.22 | 0.87701 | 2750.1 | 27.3 | 2731.8 | 13.1 | 2718.3 | 11 | -1.2 |
| Spot 225 | 141 | 26598.5  | 2.407 | 3.4 | 0.7 | 29.3 | 1.6 | 0.7 | 1.41 | 0.88982 | 3462.8 | 37.9 | 3464.1 | 15.6 | 3464.8 | 11 | 0.1  |
| Spot 226 | 157 | 56545.4  | 2.162 | 5.4 | 0.7 | 13.3 | 1.5 | 0.5 | 1.33 | 0.87924 | 2689.1 | 29.3 | 2698.4 | 14.3 | 2705.4 | 12 | 0.6  |
| Spot 227 | 202 | 42350.5  | 1.181 | 7.7 | 0.8 | 7.1  | 1.5 | 0.4 | 1.21 | 0.82727 | 2127.2 | 22.0 | 2124.6 | 13.1 | 2122.0 | 14 | -0.2 |

|          |     |          |       |     |     |      |     |     |      |         |        |      |        |      |        |    |      |
|----------|-----|----------|-------|-----|-----|------|-----|-----|------|---------|--------|------|--------|------|--------|----|------|
| Spot 228 | 82  | 12049.2  | 1.954 | 8.7 | 0.8 | 5.3  | 1.6 | 0.3 | 1.40 | 0.87128 | 1853.4 | 22.5 | 1867.8 | 13.7 | 1883.9 | 14 | 1.6  |
| Spot 229 | 154 | 24527.1  | 2.151 | 5.5 | 0.8 | 13.2 | 1.6 | 0.5 | 1.42 | 0.87332 | 2697.7 | 31.3 | 2692.8 | 15.4 | 2689.1 | 13 | -0.3 |
| Spot 230 | 243 | 37605.2  | 5.266 | 7.5 | 1.1 | 7.3  | 1.9 | 0.4 | 1.57 | 0.82204 | 2129.2 | 28.5 | 2146.7 | 17.1 | 2163.5 | 19 | 1.6  |
| Spot 231 | 171 | 31116.3  | 2.622 | 7.4 | 1.0 | 7.6  | 1.6 | 0.4 | 1.31 | 0.80857 | 2178.5 | 24.2 | 2181.2 | 14.5 | 2183.8 | 17 | 0.2  |
| Spot 232 | 176 | 25600.4  | 2.458 | 3.9 | 0.7 | 23.1 | 1.3 | 0.7 | 1.16 | 0.86776 | 3240.1 | 29.4 | 3231.3 | 13.0 | 3225.9 | 10 | -0.4 |
| Spot 233 | 117 | 70441.3  | 1.505 | 5.5 | 0.7 | 13.6 | 2.0 | 0.5 | 1.93 | 0.94697 | 2747.9 | 43.1 | 2719.4 | 19.2 | 2698.2 | 11 | -1.8 |
| Spot 234 | 140 | 46616.3  | 1.625 | 5.3 | 1.1 | 13.6 | 1.9 | 0.5 | 1.53 | 0.80523 | 2701.9 | 33.7 | 2720.0 | 17.9 | 2733.4 | 18 | 1.2  |
| Spot 235 | 284 | 555954.3 | 1.134 | 3.9 | 1.0 | 23.6 | 1.8 | 0.7 | 1.56 | 0.85107 | 3269.3 | 39.9 | 3250.8 | 17.8 | 3239.3 | 15 | -0.9 |
| Spot 237 | 49  | 1722.0   | 0.962 | 8.3 | 1.4 | 5.1  | 2.2 | 0.3 | 1.68 | 0.76783 | 1799.5 | 26.4 | 1828.1 | 18.6 | 1860.8 | 25 | 3.3  |
| Spot 238 | 169 | 28409.1  | 1.469 | 4.7 | 0.8 | 18.0 | 1.7 | 0.6 | 1.48 | 0.88343 | 3048.4 | 36.0 | 2988.2 | 16.1 | 2948.0 | 13 | -3.4 |
| Spot 239 | 40  | 3342.6   | 1.616 | 7.2 | 1.4 | 7.4  | 2.4 | 0.4 | 1.93 | 0.79990 | 2159.9 | 35.4 | 2166.1 | 21.6 | 2171.9 | 25 | 0.6  |
| Spot 240 | 254 | 363918.0 | 2.149 | 5.4 | 0.7 | 13.5 | 1.2 | 0.5 | 1.02 | 0.82832 | 2736.0 | 22.7 | 2716.6 | 11.6 | 2702.3 | 11 | -1.2 |
| Spot 241 | 115 | 20229.6  | 2.903 | 7.3 | 0.9 | 7.6  | 1.4 | 0.4 | 1.12 | 0.78675 | 2175.3 | 20.6 | 2187.2 | 12.7 | 2198.3 | 15 | 1.0  |
| Spot 242 | 324 | 246099.3 | 2.136 | 8.0 | 0.8 | 6.9  | 1.3 | 0.4 | 1.04 | 0.79182 | 2138.7 | 18.9 | 2095.8 | 11.7 | 2054.0 | 14 | -4.1 |
| Spot 243 | 232 | 32260.9  | 1.999 | 7.4 | 0.9 | 8.0  | 1.5 | 0.4 | 1.24 | 0.81977 | 2278.5 | 23.8 | 2227.1 | 13.6 | 2180.2 | 15 | -4.5 |
| Spot 244 | 342 | 39342.5  | 2.223 | 5.4 | 1.1 | 13.5 | 2.3 | 0.5 | 2.09 | 0.88900 | 2727.5 | 46.4 | 2713.8 | 22.2 | 2703.5 | 18 | -0.9 |
| Spot 245 | 247 | 34562.0  | 1.086 | 7.4 | 0.7 | 7.6  | 1.5 | 0.4 | 1.34 | 0.87703 | 2209.3 | 25.1 | 2189.0 | 13.7 | 2170.1 | 13 | -1.8 |
| Spot 247 | 104 | 9013.3   | 2.677 | 7.0 | 1.1 | 8.6  | 1.6 | 0.4 | 1.07 | 0.69022 | 2329.1 | 21.0 | 2297.7 | 14.1 | 2270.0 | 19 | -2.6 |
| Spot 249 | 121 | 22528.6  | 1.800 | 7.7 | 1.4 | 7.1  | 2.1 | 0.4 | 1.62 | 0.76158 | 2154.8 | 29.6 | 2128.9 | 18.9 | 2104.0 | 24 | -2.4 |
| Spot 250 | 220 | 91799.9  | 2.118 | 5.8 | 0.6 | 12.2 | 1.5 | 0.5 | 1.38 | 0.90495 | 2640.6 | 30.0 | 2620.3 | 14.3 | 2604.7 | 11 | -1.4 |
| Spot 251 | 101 | 8664.5   | 3.406 | 7.5 | 0.9 | 6.6  | 3.0 | 0.4 | 2.83 | 0.95602 | 1988.7 | 48.5 | 2057.9 | 26.1 | 2127.8 | 15 | 6.5  |
| Spot 253 | 291 | 87089.4  | 1.656 | 5.5 | 0.6 | 13.4 | 1.3 | 0.5 | 1.17 | 0.87740 | 2726.6 | 26.0 | 2706.4 | 12.6 | 2691.3 | 11 | -1.3 |
| Spot 254 | 171 | 60016.1  | 0.756 | 8.0 | 0.7 | 6.6  | 1.7 | 0.4 | 1.59 | 0.91401 | 2067.8 | 28.2 | 2056.6 | 15.4 | 2045.4 | 13 | -1.1 |
| Spot 255 | 196 | 30925.2  | 2.485 | 5.6 | 0.9 | 13.0 | 2.9 | 0.5 | 2.74 | 0.95038 | 2703.9 | 60.6 | 2677.6 | 27.2 | 2657.8 | 15 | -1.7 |
| Spot 256 | 259 | 54047.3  | 2.102 | 5.5 | 0.9 | 13.1 | 1.9 | 0.5 | 1.73 | 0.88963 | 2695.6 | 38.0 | 2688.7 | 18.3 | 2683.4 | 15 | -0.5 |
| Spot 257 | 158 | 50542.3  | 1.461 | 7.3 | 1.0 | 7.7  | 1.6 | 0.4 | 1.21 | 0.76894 | 2179.1 | 22.3 | 2194.7 | 14.1 | 2209.3 | 17 | 1.4  |
| Spot 258 | 229 | 25417.3  | 2.009 | 8.7 | 1.0 | 5.6  | 1.8 | 0.4 | 1.43 | 0.80952 | 1938.3 | 23.9 | 1918.5 | 15.2 | 1897.0 | 19 | -2.2 |
| Spot 259 | 182 | 99947.4  | 1.289 | 5.7 | 0.8 | 12.4 | 1.8 | 0.5 | 1.58 | 0.88220 | 2631.9 | 34.1 | 2632.9 | 16.8 | 2633.7 | 14 | 0.1  |
| Spot 260 | 539 | 31949.2  | 1.051 | 7.9 | 1.0 | 6.8  | 2.3 | 0.4 | 2.02 | 0.89223 | 2110.3 | 36.4 | 2091.0 | 20.1 | 2072.0 | 18 | -1.8 |
| Spot 261 | 167 | 48403.0  | 1.879 | 5.5 | 0.8 | 13.5 | 1.4 | 0.5 | 1.19 | 0.82517 | 2743.8 | 26.5 | 2715.2 | 13.6 | 2693.9 | 13 | -1.9 |
| Spot 262 | 133 | 113680.2 | 1.885 | 7.1 | 0.8 | 7.2  | 3.7 | 0.4 | 3.63 | 0.97554 | 2014.1 | 62.9 | 2135.0 | 33.2 | 2253.4 | 14 | 10.6 |
| Spot 263 | 219 | 56173.0  | 2.405 | 5.5 | 0.8 | 13.4 | 1.3 | 0.5 | 1.01 | 0.78938 | 2721.5 | 22.3 | 2705.0 | 12.0 | 2692.7 | 13 | -1.1 |
| Spot 264 | 470 | 131374.7 | 1.683 | 5.6 | 0.7 | 13.3 | 1.6 | 0.5 | 1.42 | 0.89286 | 2754.1 | 31.9 | 2700.1 | 15.0 | 2659.9 | 12 | -3.5 |
| Spot 265 | 393 | 80230.1  | 2.360 | 5.1 | 0.7 | 15.4 | 1.2 | 0.6 | 0.92 | 0.78612 | 2893.5 | 21.3 | 2842.0 | 11.1 | 2805.6 | 12 | -3.1 |
| Spot 266 | 62  | 11023.0  | 0.955 | 5.4 | 0.9 | 13.3 | 2.1 | 0.5 | 1.91 | 0.90161 | 2707.8 | 42.1 | 2703.8 | 20.0 | 2700.9 | 15 | -0.3 |
| Spot 267 | 319 | 115155.2 | 1.825 | 8.4 | 0.7 | 6.1  | 1.8 | 0.4 | 1.61 | 0.90779 | 2015.6 | 27.9 | 1986.4 | 15.5 | 1956.1 | 13 | -3.0 |
| Spot 268 | 412 | 27330.7  | 1.864 | 5.5 | 0.7 | 13.1 | 1.2 | 0.5 | 1.01 | 0.82336 | 2685.8 | 22.2 | 2684.8 | 11.6 | 2684.0 | 12 | -0.1 |
| Spot 269 | 147 | 30544.6  | 2.176 | 5.5 | 0.8 | 13.2 | 1.5 | 0.5 | 1.21 | 0.82360 | 2715.6 | 26.9 | 2695.9 | 13.9 | 2681.3 | 14 | -1.3 |
| Spot 271 | 90  | 31835.0  | 1.133 | 7.6 | 1.0 | 6.6  | 3.7 | 0.4 | 3.53 | 0.96015 | 1995.6 | 60.6 | 2057.5 | 32.4 | 2120.1 | 18 | 5.9  |
| Spot 272 | 156 | 17513.0  | 2.070 | 7.2 | 0.6 | 8.2  | 1.5 | 0.4 | 1.34 | 0.90247 | 2286.7 | 25.8 | 2248.2 | 13.4 | 2213.4 | 11 | -3.3 |
| Spot 273 | 214 | 197917.0 | 2.068 | 5.5 | 0.7 | 13.4 | 1.3 | 0.5 | 1.11 | 0.83393 | 2732.7 | 24.7 | 2706.6 | 12.6 | 2687.2 | 12 | -1.7 |
| Spot 274 | 159 | 698712.1 | 2.020 | 7.7 | 0.9 | 6.9  | 1.5 | 0.4 | 1.20 | 0.80225 | 2084.3 | 21.3 | 2095.9 | 13.2 | 2107.2 | 16 | 1.1  |
| Spot 275 | 474 | 93878.2  | 1.676 | 5.6 | 0.7 | 12.9 | 1.5 | 0.5 | 1.32 | 0.88946 | 2698.9 | 29.2 | 2669.3 | 14.0 | 2646.9 | 11 | -2.0 |

|                              |     |          |       |      |     |      |      |     |       |         |        |       |        |       |        |     |       |
|------------------------------|-----|----------|-------|------|-----|------|------|-----|-------|---------|--------|-------|--------|-------|--------|-----|-------|
| Spot 276                     | 78  | 31232.6  | 3.283 | 7.6  | 1.2 | 6.3  | 4.4  | 0.3 | 4.19  | 0.95944 | 1905.9 | 69.1  | 2019.6 | 38.3  | 2137.9 | 22  | 10.9  |
| Spot 278                     | 48  | 1957.0   | 1.746 | 7.3  | 2.5 | 6.9  | 3.2  | 0.4 | 2.02  | 0.62471 | 2071.0 | 35.8  | 2099.6 | 28.7  | 2127.6 | 44  | 2.7   |
| Spot 279                     | 222 | 21627.3  | 2.705 | 8.8  | 0.8 | 5.5  | 2.7  | 0.3 | 2.54  | 0.95394 | 1925.8 | 42.4  | 1901.4 | 22.9  | 1874.8 | 14  | -2.7  |
| Spot 280                     | 152 | 17375.5  | 2.429 | 5.5  | 0.9 | 13.2 | 1.6  | 0.5 | 1.36  | 0.84151 | 2688.0 | 30.0  | 2691.5 | 15.3  | 2694.2 | 14  | 0.2   |
| Spot 281                     | 259 | 22020.0  | 1.508 | 8.1  | 0.7 | 6.4  | 1.6  | 0.4 | 1.37  | 0.87612 | 2053.4 | 24.1  | 2031.5 | 13.7  | 2009.2 | 13  | -2.2  |
| Spot 282                     | 205 | 38489.8  | 1.531 | 7.8  | 0.9 | 7.2  | 1.6  | 0.4 | 1.31  | 0.80983 | 2169.4 | 24.1  | 2133.3 | 14.4  | 2098.7 | 17  | -3.4  |
| Spot 283                     | 172 | 12283.6  | 1.479 | 7.6  | 0.9 | 6.3  | 3.7  | 0.3 | 3.63  | 0.96863 | 1913.4 | 60.1  | 2017.9 | 32.9  | 2126.5 | 16  | 10.0  |
| Spot 284                     | 110 | 18521.6  | 1.828 | 7.6  | 1.0 | 7.0  | 1.8  | 0.4 | 1.41  | 0.79987 | 2082.7 | 25.0  | 2109.5 | 15.6  | 2135.7 | 18  | 2.5   |
| Spot 285                     | 460 | 44776.6  | 2.676 | 7.8  | 0.6 | 6.9  | 1.2  | 0.4 | 1.07  | 0.85777 | 2118.1 | 19.3  | 2102.3 | 11.1  | 2086.9 | 11  | -1.5  |
| Spot 286                     | 354 | 81390.4  | 0.770 | 5.5  | 0.7 | 13.5 | 1.8  | 0.5 | 1.67  | 0.91778 | 2740.1 | 37.4  | 2714.5 | 17.2  | 2695.5 | 12  | -1.7  |
| Spot 287                     | 90  | 48382.8  | 2.778 | 7.4  | 0.8 | 6.9  | 3.3  | 0.4 | 3.16  | 0.96942 | 1995.1 | 54.3  | 2094.8 | 28.9  | 2194.2 | 14  | 9.1   |
| Spot 288                     | 41  | 2862.5   | 1.764 | 7.4  | 1.6 | 6.8  | 2.8  | 0.4 | 2.21  | 0.80216 | 2033.1 | 38.5  | 2084.8 | 24.4  | 2136.3 | 29  | 4.8   |
| Spot 289                     | 59  | 5600.7   | 1.303 | 5.0  | 0.9 | 14.8 | 1.7  | 0.5 | 1.43  | 0.84883 | 2761.4 | 32.2  | 2804.7 | 16.1  | 2835.9 | 15  | 2.6   |
| Spot 290                     | 89  | 30880.8  | 2.148 | 7.2  | 1.1 | 7.6  | 2.0  | 0.4 | 1.73  | 0.84449 | 2134.9 | 31.4  | 2187.1 | 18.3  | 2236.3 | 19  | 4.5   |
| Spot 291                     | 272 | 57360.2  | 2.180 | 5.5  | 0.8 | 13.5 | 1.4  | 0.5 | 1.21  | 0.84694 | 2750.6 | 27.2  | 2715.0 | 13.5  | 2688.6 | 13  | -2.3  |
| Spot 292                     | 39  | 2641.1   | 2.416 | 6.1  | 1.2 | 10.5 | 2.2  | 0.5 | 1.78  | 0.80534 | 2465.0 | 36.4  | 2476.2 | 20.5  | 2485.4 | 22  | 0.8   |
| Spot 293                     | 159 | 9564.4   | 1.768 | 6.2  | 3.1 | 8.7  | 3.4  | 0.4 | 1.38  | 0.40295 | 2126.2 | 25.0  | 2310.7 | 31.3  | 2477.9 | 53  | 14.2  |
| Spot 294                     | 478 | 47812.2  | 4.681 | 5.3  | 0.6 | 14.7 | 1.3  | 0.6 | 1.16  | 0.87557 | 2863.3 | 26.8  | 2799.2 | 12.6  | 2753.4 | 10  | -4.0  |
| Spot 296                     | 201 | 13916.0  | 1.209 | 8.8  | 0.9 | 5.2  | 1.8  | 0.3 | 1.54  | 0.85963 | 1837.1 | 24.6  | 1857.0 | 15.2  | 1879.4 | 16  | 2.3   |
| Spot 297                     | 180 | 33450.0  | 1.745 | 7.8  | 0.8 | 6.8  | 2.0  | 0.4 | 1.77  | 0.90104 | 2061.7 | 31.2  | 2081.7 | 17.3  | 2101.5 | 15  | 1.9   |
| Spot 298                     | 281 | 33014.8  | 1.031 | 8.8  | 0.7 | 5.7  | 1.5  | 0.4 | 1.33  | 0.87198 | 1966.4 | 22.6  | 1926.6 | 13.2  | 1884.1 | 13  | -4.4  |
| Spot 299                     | 42  | 5470.4   | 2.566 | 7.3  | 1.5 | 7.5  | 2.3  | 0.4 | 1.68  | 0.73727 | 2164.5 | 31.0  | 2176.6 | 20.5  | 2187.9 | 27  | 1.1   |
| Spot 300                     | 121 | 16410.9  | 2.057 | 5.5  | 0.8 | 13.2 | 1.4  | 0.5 | 1.07  | 0.78333 | 2691.2 | 23.5  | 2691.0 | 12.8  | 2690.9 | 14  | 0.0   |
| Spot 301                     | 166 | 27394.9  | 0.710 | 6.8  | 0.8 | 8.7  | 1.6  | 0.4 | 1.42  | 0.87982 | 2293.5 | 27.4  | 2309.7 | 14.7  | 2324.0 | 13  | 1.3   |
| Spot 302                     | 66  | 13841.3  | 0.718 | 5.7  | 1.1 | 12.8 | 1.7  | 0.5 | 1.32  | 0.76604 | 2717.5 | 29.4  | 2666.4 | 16.3  | 2627.8 | 18  | -3.4  |
| Spot 303                     | 162 | 340616.2 | 2.904 | 7.5  | 0.9 | 7.1  | 2.7  | 0.4 | 2.58  | 0.93996 | 2092.3 | 46.1  | 2126.2 | 24.4  | 2159.1 | 16  | 3.1   |
| Spot 304                     | 275 | 36322.7  | 1.678 | 5.6  | 0.9 | 12.9 | 1.6  | 0.5 | 1.33  | 0.84059 | 2675.2 | 29.0  | 2669.5 | 14.9  | 2665.3 | 14  | -0.4  |
| Spot 305                     | 143 | 161322.8 | 2.492 | 7.6  | 1.0 | 7.2  | 1.7  | 0.4 | 1.33  | 0.78547 | 2139.8 | 24.2  | 2139.3 | 15.1  | 2138.8 | 18  | 0.0   |
| Spot 306                     | 99  | 7625.1   | 1.617 | 8.6  | 1.0 | 5.4  | 1.8  | 0.3 | 1.46  | 0.82706 | 1857.7 | 23.6  | 1879.0 | 15.1  | 1902.6 | 18  | 2.4   |
| Spot 307                     | 253 | 39796.1  | 2.213 | 5.4  | 0.7 | 13.8 | 1.4  | 0.5 | 1.20  | 0.85485 | 2734.3 | 26.7  | 2734.7 | 13.3  | 2734.9 | 12  | 0.0   |
| Spot 308                     | 216 | 38813.3  | 2.580 | 5.0  | 0.9 | 15.9 | 1.6  | 0.6 | 1.37  | 0.83311 | 2910.7 | 32.1  | 2869.9 | 15.7  | 2841.4 | 15  | -2.4  |
| Spot 309                     | 180 | 132505.7 | 3.218 | 5.1  | 1.2 | 15.3 | 1.9  | 0.6 | 1.51  | 0.77760 | 2879.1 | 35.1  | 2836.7 | 18.5  | 2806.8 | 20  | -2.6  |
| Spot 310                     | 78  | 5644.5   | 1.180 | 7.5  | 1.7 | 7.0  | 2.2  | 0.4 | 1.35  | 0.61158 | 2095.2 | 24.1  | 2115.0 | 19.6  | 2134.4 | 30  | 1.8   |
| Spot 311                     | 232 | 36126.3  | 1.867 | 7.4  | 0.8 | 7.8  | 1.6  | 0.4 | 1.39  | 0.86078 | 2230.7 | 26.2  | 2204.6 | 14.5  | 2180.5 | 14  | -2.3  |
| Spot 312                     | 156 | 48866.0  | 2.147 | 7.4  | 0.9 | 7.4  | 1.4  | 0.4 | 1.03  | 0.76168 | 2128.0 | 18.7  | 2156.3 | 12.1  | 2183.4 | 15  | 2.5   |
| Spot 313                     | 286 | 47067.3  | 1.799 | 5.6  | 0.8 | 13.0 | 1.3  | 0.5 | 0.96  | 0.76587 | 2716.7 | 21.3  | 2677.8 | 11.8  | 2648.6 | 13  | -2.6  |
| Spot 314                     | 189 | 75009.3  | 2.627 | 5.5  | 1.1 | 13.7 | 1.8  | 0.5 | 1.41  | 0.78887 | 2767.2 | 31.7  | 2729.3 | 16.9  | 2701.3 | 18  | -2.4  |
| Spot 315                     | 87  | 18538.7  | 1.168 | 3.5  | 0.9 | 26.9 | 1.5  | 0.7 | 1.18  | 0.80145 | 3306.8 | 30.4  | 3380.7 | 14.4  | 3424.8 | 14  | 3.4   |
| Run 1 (discordant Sept 2021) |     |          |       |      |     |      |      |     |       |         |        |       |        |       |        |     |       |
| Spot 1                       | 91  | 179767.1 | 1.754 | 10.8 | 5.9 | 6.4  | 30.6 | 0.5 | 30.00 | 0.98133 | 2630.1 | 650.1 | 2036.9 | 275.2 | 1480.1 | 112 | -77.7 |
| Spot 124                     | 131 | 34789.7  | 1.884 | 8.2  | 7.7 | 6.6  | 16.0 | 0.4 | 14.06 | 0.87704 | 2140.3 | 256.2 | 2060.7 | 142.3 | 1982.0 | 137 | -8.0  |
| Spot 14                      | 67  | 4348.0   | 1.124 | 5.8  | 7.6 | 12.9 | 10.5 | 0.5 | 7.24  | 0.68770 | 2771.8 | 163.2 | 2669.1 | 99.6  | 2592.2 | 128 | -6.9  |
| Spot 156                     | 149 | 34539.7  | 1.073 | 7.8  | 6.1 | 6.5  | 10.3 | 0.4 | 8.29  | 0.80376 | 2038.3 | 144.9 | 2051.2 | 91.1  | 2064.2 | 108 | 1.3   |

|          |     |          |       |      |      |      |      |     |       |         |        |       |        |       |        |     |       |
|----------|-----|----------|-------|------|------|------|------|-----|-------|---------|--------|-------|--------|-------|--------|-----|-------|
| Spot 170 | 91  | 203556.7 | 2.127 | 7.9  | 8.1  | 7.4  | 12.9 | 0.4 | 10.07 | 0.77970 | 2255.9 | 191.7 | 2155.2 | 115.9 | 2060.6 | 143 | -9.5  |
| Spot 173 | 118 | 27271.0  | 2.557 | 7.8  | 1.0  | 7.2  | 2.1  | 0.4 | 1.87  | 0.88630 | 2194.6 | 34.8  | 2135.8 | 18.8  | 2079.7 | 17  | -5.5  |
| Spot 181 | 86  | 32393.8  | 1.830 | 6.6  | 7.8  | 10.0 | 8.1  | 0.5 | 2.33  | 0.28697 | 2508.2 | 48.3  | 2434.2 | 75.0  | 2373.0 | 133 | -5.7  |
| Spot 186 | 162 | 67035.0  | 2.463 | 5.8  | 2.9  | 19.4 | 13.2 | 0.8 | 12.86 | 0.97598 | 3861.4 | 374.1 | 3063.1 | 127.9 | 2574.7 | 48  | -50.0 |
| Spot 198 | 25  | 6630.0   | 1.704 | 4.9  | 13.0 | 20.1 | 24.8 | 0.7 | 21.10 | 0.85139 | 3490.4 | 570.2 | 3093.8 | 244.3 | 2845.6 | 213 | -22.7 |
| Spot 21  | 253 | 29613.0  | 1.913 | 5.5  | 0.9  | 13.6 | 1.5  | 0.5 | 1.21  | 0.79582 | 2801.7 | 27.5  | 2720.3 | 14.4  | 2660.3 | 15  | -5.3  |
| Spot 211 | 288 | 36027.5  | 2.240 | 8.7  | 0.8  | 5.8  | 1.2  | 0.4 | 0.96  | 0.78246 | 2019.9 | 16.6  | 1946.0 | 10.6  | 1868.2 | 14  | -8.1  |
| Spot 236 | 133 | 33482.0  | 1.190 | 8.3  | 7.6  | 6.8  | 13.9 | 0.4 | 11.59 | 0.83462 | 2213.9 | 217.2 | 2085.5 | 123.5 | 1961.0 | 137 | -12.9 |
| Spot 246 | 506 | 182298.6 | 1.665 | 5.7  | 0.8  | 13.1 | 1.8  | 0.5 | 1.61  | 0.88737 | 2780.9 | 36.3  | 2687.7 | 17.1  | 2618.4 | 14  | -6.2  |
| Spot 248 | 92  | 7365.5   | 2.978 | 7.8  | 3.9  | 7.1  | 6.3  | 0.4 | 4.97  | 0.79069 | 2192.4 | 92.4  | 2128.2 | 56.1  | 2066.7 | 68  | -6.1  |
| Spot 252 | 29  | 17393.1  | 1.171 | 21.2 | 0.8  | 6.6  | 1.3  | 1.0 | 0.97  | 0.76681 | 4502.2 | 31.5  | 2055.7 | 11.2  | 57.8   | 19  | ####  |
| Spot 26  | 30  | 3400.8   | 1.286 | 8.8  | 2.1  | 6.1  | 3.6  | 0.4 | 2.86  | 0.80400 | 2127.2 | 51.8  | 1993.8 | 31.1  | 1858.2 | 38  | -14.5 |
| Spot 270 | 311 | 66080.6  | 1.687 | 7.6  | 0.8  | 7.6  | 1.6  | 0.4 | 1.41  | 0.87624 | 2234.9 | 26.6  | 2179.6 | 14.4  | 2127.9 | 14  | -5.0  |
| Spot 277 | 40  | 8471.6   | 1.288 | 8.1  | 6.8  | 6.7  | 12.1 | 0.4 | 10.00 | 0.82873 | 2139.0 | 182.0 | 2067.4 | 106.9 | 1996.8 | 120 | -7.1  |
| Spot 295 | 52  | 6955.6   | 2.217 | 8.0  | 5.0  | 7.2  | 8.6  | 0.4 | 7.01  | 0.81335 | 2234.9 | 132.4 | 2132.5 | 76.9  | 2035.2 | 89  | -9.8  |
| Spot 30  | 20  | 1419.6   | 5.509 | 7.9  | 1.6  | 6.9  | 2.3  | 0.4 | 1.67  | 0.71706 | 2157.0 | 30.7  | 2102.3 | 20.7  | 2049.1 | 29  | -5.3  |
| Spot 67  | 6   | 1000.0   | 3.606 | 5.1  | 1.0  | 27.4 | 1.2  | 1.0 | 0.60  | 0.51417 | 4529.7 | 19.5  | 3399.2 | 11.4  | 2786.9 | 16  | -62.5 |
| Spot 9   | 206 | 30187.7  | 1.975 | 7.9  | 0.9  | 7.0  | 1.6  | 0.4 | 1.35  | 0.83576 | 2178.4 | 25.0  | 2116.6 | 14.4  | 2057.0 | 16  | -5.9  |

**Run 1 (Nov.)**

|         |     |           |       |     |     |      |     |     |      |         |        |      |        |      |        |    |      |
|---------|-----|-----------|-------|-----|-----|------|-----|-----|------|---------|--------|------|--------|------|--------|----|------|
| Spot 1  | 115 | 350334.3  | 1.924 | 7.5 | 0.6 | 7.2  | 1.3 | 0.4 | 1.11 | 0.86466 | 2146.5 | 20.3 | 2140.0 | 11.5 | 2133.7 | 11 | -0.6 |
| Spot 2  | 278 | 151108.3  | 2.084 | 5.3 | 0.6 | 12.9 | 1.0 | 0.5 | 0.87 | 0.83877 | 2633.2 | 18.9 | 2675.2 | 9.8  | 2707.1 | 9  | 2.7  |
| Spot 3  | 85  | 122018.2  | 2.211 | 7.5 | 0.7 | 7.1  | 1.3 | 0.4 | 1.03 | 0.81700 | 2129.0 | 18.7 | 2129.7 | 11.2 | 2130.4 | 13 | 0.1  |
| Spot 4  | 125 | 104682.3  | 3.220 | 7.6 | 0.7 | 7.3  | 1.1 | 0.4 | 0.85 | 0.77678 | 2185.0 | 15.8 | 2150.8 | 9.8  | 2118.4 | 12 | -3.1 |
| Spot 5  | 79  | 30807.1   | 1.530 | 7.2 | 0.9 | 7.7  | 1.4 | 0.4 | 1.14 | 0.79753 | 2180.4 | 21.1 | 2193.4 | 12.8 | 2205.6 | 15 | 1.1  |
| Spot 6  | 153 | 114734.6  | 1.617 | 5.8 | 0.7 | 11.5 | 1.1 | 0.5 | 0.84 | 0.77493 | 2566.1 | 17.8 | 2565.4 | 10.1 | 2564.9 | 11 | 0.0  |
| Spot 7  | 103 | 57908.0   | 1.866 | 7.5 | 0.9 | 7.2  | 1.3 | 0.4 | 1.01 | 0.76444 | 2144.8 | 18.5 | 2137.2 | 11.8 | 2130.0 | 15 | -0.7 |
| Spot 8  | 71  | 38534.1   | 0.551 | 7.9 | 0.6 | 6.5  | 1.1 | 0.4 | 0.94 | 0.83368 | 2048.6 | 16.4 | 2039.8 | 9.9  | 2030.9 | 11 | -0.9 |
| Spot 9  | 231 | 328016.2  | 2.276 | 5.4 | 0.6 | 13.4 | 1.1 | 0.5 | 0.93 | 0.83645 | 2726.6 | 20.6 | 2709.3 | 10.5 | 2696.4 | 10 | -1.1 |
| Spot 10 | 117 | 114898.7  | 3.548 | 7.4 | 0.7 | 7.5  | 1.2 | 0.4 | 0.95 | 0.82135 | 2197.3 | 17.7 | 2175.7 | 10.4 | 2155.3 | 12 | -1.9 |
| Spot 11 | 222 | 259603.9  | 1.257 | 7.8 | 0.6 | 6.8  | 1.0 | 0.4 | 0.87 | 0.83355 | 2115.1 | 15.7 | 2084.8 | 9.2  | 2055.0 | 10 | -2.9 |
| Spot 12 | 271 | 369214.9  | 1.181 | 7.6 | 0.5 | 6.9  | 1.0 | 0.4 | 0.83 | 0.85089 | 2093.4 | 14.9 | 2095.0 | 8.7  | 2096.6 | 9  | 0.2  |
| Spot 13 | 200 | 99421.8   | 2.803 | 5.3 | 0.6 | 13.1 | 1.1 | 0.5 | 0.96 | 0.84547 | 2660.9 | 20.8 | 2684.8 | 10.7 | 2702.9 | 10 | 1.6  |
| Spot 14 | 225 | 207821.5  | 2.265 | 7.6 | 0.4 | 7.2  | 1.0 | 0.4 | 0.91 | 0.91650 | 2151.9 | 16.6 | 2130.9 | 8.8  | 2110.8 | 7  | -1.9 |
| Spot 15 | 278 | 449641.4  | 1.221 | 6.4 | 0.7 | 9.7  | 1.3 | 0.5 | 1.05 | 0.83568 | 2418.6 | 21.2 | 2407.3 | 11.6 | 2397.7 | 12 | -0.9 |
| Spot 16 | 172 | 259864.5  | 1.814 | 7.4 | 0.6 | 7.3  | 1.1 | 0.4 | 0.94 | 0.84049 | 2159.7 | 17.2 | 2154.1 | 10.0 | 2148.7 | 11 | -0.5 |
| Spot 17 | 306 | 424772.4  | 1.900 | 7.2 | 0.5 | 7.7  | 1.1 | 0.4 | 1.01 | 0.87846 | 2201.2 | 18.8 | 2201.4 | 10.3 | 2201.6 | 10 | 0.0  |
| Spot 18 | 79  | 99031.4   | 1.266 | 4.0 | 0.8 | 21.8 | 1.2 | 0.6 | 0.89 | 0.76167 | 3168.8 | 22.2 | 3175.3 | 11.3 | 3179.4 | 12 | 0.3  |
| Spot 19 | 41  | 52828.8   | 1.673 | 4.0 | 0.8 | 22.5 | 1.5 | 0.7 | 1.20 | 0.82177 | 3250.6 | 30.7 | 3203.6 | 14.2 | 3174.3 | 13 | -2.4 |
| Spot 20 | 172 | 88982.6   | 1.695 | 7.4 | 0.6 | 7.5  | 1.0 | 0.4 | 0.76 | 0.78942 | 2205.4 | 14.2 | 2177.8 | 8.6  | 2151.9 | 10 | -2.5 |
| Spot 21 | 84  | 60080.5   | 1.671 | 7.5 | 0.7 | 7.0  | 1.0 | 0.4 | 0.77 | 0.74611 | 2093.4 | 13.7 | 2106.2 | 9.1  | 2118.7 | 12 | 1.2  |
| Spot 22 | 202 | 182119.7  | 1.038 | 5.8 | 0.6 | 11.7 | 1.0 | 0.5 | 0.85 | 0.81184 | 2575.8 | 18.1 | 2577.6 | 9.8  | 2579.1 | 10 | 0.1  |
| Spot 23 | 133 | 99661.7   | 1.939 | 7.5 | 0.6 | 7.3  | 1.0 | 0.4 | 0.83 | 0.78744 | 2166.8 | 15.2 | 2144.7 | 9.4  | 2123.5 | 11 | -2.0 |
| Spot 24 | 114 | 2149987.1 | 1.589 | 5.4 | 0.6 | 13.2 | 1.2 | 0.5 | 1.02 | 0.86347 | 2706.3 | 22.6 | 2697.3 | 11.2 | 2690.6 | 10 | -0.6 |



|         |     |           |       |     |     |      |     |     |      |         |        |      |        |      |        |    |      |
|---------|-----|-----------|-------|-----|-----|------|-----|-----|------|---------|--------|------|--------|------|--------|----|------|
| Spot 25 | 140 | 192568.7  | 3.190 | 7.4 | 0.9 | 7.5  | 1.3 | 0.4 | 0.88 | 0.69537 | 2186.4 | 16.3 | 2170.5 | 11.3 | 2155.6 | 16 | -1.4 |
| Spot 26 | 55  | 23479.3   | 2.066 | 7.4 | 0.9 | 7.4  | 1.5 | 0.4 | 1.12 | 0.76526 | 2186.5 | 20.7 | 2163.1 | 13.1 | 2140.9 | 16 | -2.1 |
| Spot 27 | 248 | 125627.1  | 1.861 | 7.5 | 0.7 | 7.3  | 1.2 | 0.4 | 0.98 | 0.82800 | 2168.7 | 18.0 | 2152.4 | 10.5 | 2136.8 | 12 | -1.5 |
| Spot 28 | 66  | 94485.6   | 2.033 | 7.4 | 0.6 | 7.7  | 0.9 | 0.4 | 0.64 | 0.74999 | 2247.1 | 12.2 | 2198.4 | 7.7  | 2153.2 | 10 | -4.4 |
| Spot 29 | 168 | 169927.9  | 2.608 | 7.3 | 0.8 | 7.7  | 1.3 | 0.4 | 1.07 | 0.80253 | 2215.4 | 20.1 | 2200.3 | 12.0 | 2186.2 | 14 | -1.3 |
| Spot 30 | 200 | 201287.2  | 2.398 | 5.4 | 0.6 | 13.3 | 0.9 | 0.5 | 0.65 | 0.74112 | 2704.8 | 14.4 | 2698.9 | 8.3  | 2694.5 | 10 | -0.4 |
| Spot 31 | 34  | 59961.9   | 1.528 | 5.4 | 0.9 | 13.1 | 1.4 | 0.5 | 1.11 | 0.76791 | 2671.1 | 24.3 | 2685.3 | 13.7 | 2696.1 | 15 | 0.9  |
| Spot 32 | 152 | 172510.8  | 1.990 | 4.6 | 0.7 | 17.5 | 1.1 | 0.6 | 0.86 | 0.79743 | 2946.4 | 20.4 | 2960.4 | 10.4 | 2970.0 | 11 | 0.8  |
| Spot 33 | 193 | 232559.0  | 2.829 | 7.1 | 0.7 | 7.8  | 1.3 | 0.4 | 1.14 | 0.85888 | 2186.2 | 21.1 | 2206.7 | 11.9 | 2225.7 | 12 | 1.8  |
| Spot 34 | 94  | 116874.3  | 3.719 | 7.5 | 0.7 | 7.5  | 1.0 | 0.4 | 0.64 | 0.67051 | 2204.4 | 12.0 | 2171.4 | 8.6  | 2140.3 | 12 | -3.0 |
| Spot 35 | 314 | 913088.2  | 2.342 | 5.3 | 0.6 | 13.4 | 1.3 | 0.5 | 1.13 | 0.87406 | 2690.1 | 24.8 | 2707.1 | 12.2 | 2719.8 | 10 | 1.1  |
| Spot 36 | 142 | 101949.6  | 0.840 | 5.4 | 0.7 | 13.0 | 1.2 | 0.5 | 0.99 | 0.82535 | 2684.2 | 21.8 | 2679.2 | 11.4 | 2675.4 | 11 | -0.3 |
| Spot 37 | 171 | 155999.0  | 2.324 | 5.6 | 0.5 | 12.2 | 1.0 | 0.5 | 0.84 | 0.83873 | 2608.9 | 18.0 | 2618.6 | 9.4  | 2626.0 | 9  | 0.7  |
| Spot 38 | 233 | 82145.9   | 1.937 | 7.4 | 0.7 | 7.6  | 1.3 | 0.4 | 1.08 | 0.83709 | 2205.7 | 20.2 | 2183.1 | 11.6 | 2161.9 | 12 | -2.0 |
| Spot 39 | 171 | 100085.6  | 2.190 | 7.5 | 0.7 | 7.2  | 1.3 | 0.4 | 1.08 | 0.83739 | 2153.7 | 19.7 | 2140.2 | 11.5 | 2127.3 | 12 | -1.2 |
| Spot 40 | 90  | 853406.9  | 2.682 | 5.3 | 0.6 | 13.0 | 1.0 | 0.5 | 0.82 | 0.79458 | 2639.7 | 17.9 | 2682.1 | 9.8  | 2714.1 | 10 | 2.7  |
| Spot 41 | 695 | 130669.0  | 2.124 | 7.6 | 0.4 | 6.8  | 0.7 | 0.4 | 0.57 | 0.80447 | 2059.6 | 10.0 | 2085.6 | 6.3  | 2111.3 | 7  | 2.4  |
| Spot 42 | 149 | 254253.4  | 1.969 | 5.4 | 0.5 | 13.0 | 1.1 | 0.5 | 0.96 | 0.87187 | 2673.9 | 21.0 | 2679.1 | 10.4 | 2682.9 | 9  | 0.3  |
| Spot 43 | 239 | 113280.4  | 2.677 | 7.8 | 0.6 | 6.6  | 1.2 | 0.4 | 1.07 | 0.86448 | 2061.0 | 18.9 | 2060.0 | 11.0 | 2058.9 | 11 | -0.1 |
| Spot 44 | 73  | 64831.9   | 2.338 | 5.9 | 0.4 | 11.1 | 0.8 | 0.5 | 0.71 | 0.86935 | 2527.4 | 14.8 | 2534.1 | 7.6  | 2539.4 | 7  | 0.5  |
| Spot 45 | 173 | 429077.2  | 2.089 | 4.8 | 0.7 | 16.5 | 1.1 | 0.6 | 0.83 | 0.77977 | 2927.3 | 19.6 | 2908.7 | 10.2 | 2895.9 | 11 | -1.1 |
| Spot 46 | 92  | 127452.3  | 1.491 | 5.6 | 0.7 | 12.4 | 1.3 | 0.5 | 1.09 | 0.83660 | 2646.2 | 23.6 | 2637.5 | 12.2 | 2630.9 | 12 | -0.6 |
| Spot 47 | 302 | 385872.0  | 2.735 | 7.1 | 0.6 | 7.8  | 1.1 | 0.4 | 0.91 | 0.84543 | 2196.1 | 17.0 | 2207.6 | 9.7  | 2218.4 | 10 | 1.0  |
| Spot 48 | 276 | 559606.5  | 1.384 | 7.6 | 0.6 | 7.1  | 1.1 | 0.4 | 0.93 | 0.83207 | 2137.0 | 16.8 | 2125.8 | 9.9  | 2115.0 | 11 | -1.0 |
| Spot 49 | 237 | 260618.4  | 1.591 | 7.4 | 0.6 | 7.2  | 1.3 | 0.4 | 1.11 | 0.87673 | 2117.1 | 20.0 | 2139.4 | 11.3 | 2160.9 | 11 | 2.0  |
| Spot 50 | 153 | 81984.5   | 2.478 | 7.4 | 0.6 | 7.3  | 1.0 | 0.4 | 0.83 | 0.79499 | 2146.6 | 15.1 | 2148.4 | 9.3  | 2150.0 | 11 | 0.2  |
| Spot 51 | 246 | 736583.2  | 2.863 | 4.3 | 0.7 | 18.8 | 0.9 | 0.6 | 0.58 | 0.62472 | 3015.9 | 13.9 | 3032.0 | 8.9  | 3042.6 | 12 | 0.9  |
| Spot 52 | 191 | 68323.8   | 1.726 | 8.5 | 0.8 | 5.5  | 1.3 | 0.3 | 0.98 | 0.77095 | 1903.8 | 16.1 | 1900.0 | 10.9 | 1895.9 | 15 | -0.4 |
| Spot 53 | 93  | 32231.1   | 1.534 | 7.5 | 0.8 | 7.1  | 1.2 | 0.4 | 0.87 | 0.74020 | 2117.3 | 15.7 | 2117.8 | 10.4 | 2118.2 | 14 | 0.0  |
| Spot 54 | 153 | 73106.1   | 2.206 | 5.4 | 0.8 | 13.2 | 1.2 | 0.5 | 0.91 | 0.73241 | 2718.1 | 20.2 | 2696.0 | 11.7 | 2679.4 | 14 | -1.4 |
| Spot 55 | 209 | 89983.3   | 2.142 | 5.4 | 0.5 | 12.9 | 1.0 | 0.5 | 0.84 | 0.84070 | 2643.2 | 18.3 | 2669.9 | 9.5  | 2690.1 | 9  | 1.7  |
| Spot 56 | 215 | 156909.5  | 1.704 | 7.6 | 0.8 | 7.0  | 1.2 | 0.4 | 0.93 | 0.77630 | 2115.1 | 16.7 | 2110.8 | 10.6 | 2106.6 | 13 | -0.4 |
| Spot 57 | 169 | 170613.3  | 3.808 | 7.1 | 0.7 | 7.7  | 1.1 | 0.4 | 0.90 | 0.79074 | 2170.7 | 16.6 | 2199.5 | 10.3 | 2226.4 | 12 | 2.5  |
| Spot 58 | 168 | 439114.8  | 0.998 | 7.7 | 0.8 | 6.7  | 1.3 | 0.4 | 1.05 | 0.79984 | 2062.4 | 18.6 | 2073.3 | 11.6 | 2084.1 | 14 | 1.0  |
| Spot 59 | 107 | 459059.7  | 2.063 | 7.6 | 0.6 | 6.9  | 1.0 | 0.4 | 0.78 | 0.79494 | 2089.5 | 13.8 | 2102.3 | 8.7  | 2114.8 | 10 | 1.2  |
| Spot 60 | 172 | 137365.8  | 2.584 | 4.5 | 1.3 | 17.2 | 1.6 | 0.6 | 0.97 | 0.60335 | 2880.6 | 22.5 | 2948.2 | 15.4 | 2994.7 | 21 | 3.8  |
| Spot 61 | 327 | 1294794.0 | 2.114 | 7.5 | 0.5 | 7.1  | 0.9 | 0.4 | 0.71 | 0.81482 | 2128.0 | 12.9 | 2125.3 | 7.8  | 2122.6 | 9  | -0.3 |
| Spot 62 | 353 | 135022.3  | 2.036 | 8.5 | 0.8 | 5.5  | 1.6 | 0.3 | 1.38 | 0.85415 | 1878.6 | 22.4 | 1893.1 | 13.8 | 1909.0 | 15 | 1.6  |
| Spot 63 | 149 | 711802.7  | 3.016 | 7.6 | 0.7 | 7.0  | 1.4 | 0.4 | 1.20 | 0.86926 | 2118.5 | 21.7 | 2117.6 | 12.3 | 2116.7 | 12 | -0.1 |
| Spot 64 | 259 | 127077.4  | 1.366 | 8.5 | 0.5 | 5.5  | 0.9 | 0.3 | 0.78 | 0.82310 | 1896.3 | 12.8 | 1898.9 | 8.1  | 1901.7 | 10 | 0.3  |
| Spot 65 | 118 | 531799.5  | 1.996 | 7.3 | 0.6 | 7.4  | 1.0 | 0.4 | 0.84 | 0.82800 | 2163.3 | 15.4 | 2166.7 | 9.1  | 2169.8 | 10 | 0.3  |
| Spot 66 | 137 | 141951.2  | 1.721 | 6.9 | 0.6 | 8.6  | 0.9 | 0.4 | 0.67 | 0.76351 | 2308.9 | 13.0 | 2296.3 | 8.0  | 2285.1 | 10 | -1.0 |
| Spot 67 | 203 | 270583.9  | 2.279 | 4.6 | 0.6 | 16.7 | 1.0 | 0.6 | 0.84 | 0.82169 | 2892.8 | 19.6 | 2919.3 | 9.8  | 2937.6 | 9  | 1.5  |

|          |     |           |       |     |     |      |     |     |      |         |        |      |        |      |        |    |      |
|----------|-----|-----------|-------|-----|-----|------|-----|-----|------|---------|--------|------|--------|------|--------|----|------|
| Spot 68  | 27  | 16898.9   | 1.463 | 5.2 | 0.9 | 12.9 | 1.2 | 0.5 | 0.88 | 0.71441 | 2581.7 | 18.7 | 2674.8 | 11.6 | 2746.0 | 14 | 6.0  |
| Spot 69  | 243 | 579735.6  | 2.021 | 5.3 | 0.6 | 13.2 | 1.1 | 0.5 | 0.99 | 0.87341 | 2668.0 | 21.7 | 2694.5 | 10.7 | 2714.3 | 9  | 1.7  |
| Spot 70  | 116 | 158829.0  | 1.749 | 5.4 | 0.6 | 13.2 | 0.9 | 0.5 | 0.64 | 0.72041 | 2703.9 | 14.1 | 2694.7 | 8.4  | 2687.7 | 10 | -0.6 |
| Spot 71  | 86  | 101887.0  | 3.529 | 7.5 | 0.6 | 7.2  | 1.2 | 0.4 | 1.02 | 0.85085 | 2136.4 | 18.6 | 2133.5 | 10.7 | 2130.8 | 11 | -0.3 |
| Spot 72  | 277 | 232602.7  | 2.533 | 7.3 | 0.6 | 7.4  | 1.1 | 0.4 | 0.88 | 0.82150 | 2145.6 | 16.0 | 2155.3 | 9.5  | 2164.6 | 11 | 0.9  |
| Spot 73  | 191 | 127436.4  | 1.500 | 4.7 | 0.6 | 16.9 | 1.2 | 0.6 | 0.98 | 0.84021 | 2929.1 | 23.1 | 2928.3 | 11.2 | 2927.7 | 10 | 0.0  |
| Spot 74  | 15  | 11426.5   | 0.892 | 7.4 | 1.1 | 7.6  | 1.4 | 0.4 | 0.94 | 0.66041 | 2226.6 | 17.7 | 2179.2 | 12.8 | 2134.9 | 19 | -4.3 |
| Spot 75  | 286 | 240175.6  | 1.875 | 5.4 | 0.6 | 13.0 | 0.9 | 0.5 | 0.64 | 0.74670 | 2663.4 | 14.1 | 2680.3 | 8.1  | 2693.1 | 9  | 1.1  |
| Spot 76  | 14  | 28232.8   | 1.726 | 5.6 | 0.9 | 11.9 | 1.3 | 0.5 | 0.92 | 0.71329 | 2571.6 | 19.5 | 2597.5 | 12.1 | 2617.8 | 15 | 1.8  |
| Spot 77  | 238 | 138923.1  | 2.099 | 7.3 | 0.6 | 7.6  | 1.1 | 0.4 | 0.93 | 0.84779 | 2200.7 | 17.3 | 2185.5 | 9.8  | 2171.2 | 10 | -1.4 |
| Spot 78  | 47  | 25824.9   | 2.636 | 7.3 | 0.7 | 7.3  | 1.3 | 0.4 | 1.08 | 0.84690 | 2138.6 | 19.7 | 2150.7 | 11.4 | 2162.2 | 12 | 1.1  |
| Spot 79  | 209 | 356604.2  | 1.456 | 8.6 | 0.5 | 5.5  | 0.8 | 0.3 | 0.66 | 0.80841 | 1903.1 | 10.9 | 1897.7 | 7.1  | 1891.8 | 9  | -0.6 |
| Spot 80  | 244 | 127904.9  | 1.744 | 8.6 | 1.8 | 5.5  | 2.6 | 0.3 | 1.88 | 0.73237 | 1917.1 | 31.2 | 1898.7 | 22.1 | 1878.6 | 32 | -2.0 |
| Spot 81  | 179 | 96440.0   | 1.302 | 8.3 | 0.5 | 5.8  | 0.8 | 0.4 | 0.69 | 0.82428 | 1959.2 | 11.7 | 1952.7 | 7.3  | 1945.7 | 8  | -0.7 |
| Spot 82  | 168 | 120104.1  | 1.472 | 8.3 | 0.8 | 6.0  | 1.3 | 0.4 | 0.96 | 0.75856 | 1982.6 | 16.3 | 1971.0 | 11.0 | 1958.7 | 15 | -1.2 |
| Spot 83  | 154 | 1404398.8 | 1.060 | 5.3 | 0.7 | 13.6 | 1.1 | 0.5 | 0.89 | 0.79254 | 2750.9 | 20.0 | 2724.7 | 10.7 | 2705.4 | 11 | -1.7 |
| Spot 84  | 53  | 50417.1   | 3.139 | 7.3 | 0.8 | 7.3  | 1.3 | 0.4 | 1.06 | 0.80550 | 2143.9 | 19.4 | 2152.7 | 11.8 | 2161.1 | 14 | 0.8  |
| Spot 85  | 255 | 776624.5  | 2.584 | 5.5 | 0.5 | 12.4 | 1.0 | 0.5 | 0.88 | 0.87075 | 2630.6 | 18.9 | 2637.5 | 9.5  | 2642.8 | 8  | 0.5  |
| Spot 86  | 219 | 183807.6  | 1.938 | 7.7 | 0.6 | 6.9  | 1.0 | 0.4 | 0.81 | 0.81203 | 2113.5 | 14.6 | 2097.5 | 8.8  | 2081.7 | 10 | -1.5 |
| Spot 87  | 308 | 547422.8  | 2.227 | 5.3 | 0.7 | 13.3 | 1.3 | 0.5 | 1.11 | 0.85321 | 2691.5 | 24.5 | 2698.3 | 12.3 | 2703.3 | 11 | 0.4  |
| Spot 88  | 89  | 99982.6   | 2.656 | 7.4 | 0.7 | 7.4  | 1.2 | 0.4 | 0.97 | 0.79472 | 2166.4 | 17.8 | 2162.2 | 10.9 | 2158.2 | 13 | -0.4 |
| Spot 89  | 127 | 49207.1   | 2.010 | 7.6 | 0.9 | 7.0  | 1.4 | 0.4 | 1.11 | 0.78587 | 2111.6 | 20.1 | 2107.7 | 12.6 | 2103.9 | 15 | -0.4 |
| Spot 90  | 31  | 20506.5   | 1.760 | 6.2 | 0.8 | 10.1 | 1.4 | 0.5 | 1.10 | 0.79634 | 2454.3 | 22.5 | 2447.1 | 12.8 | 2441.2 | 14 | -0.5 |
| Spot 91  | 72  | 47067.6   | 2.718 | 7.6 | 0.7 | 7.2  | 1.1 | 0.4 | 0.83 | 0.77058 | 2178.4 | 15.4 | 2142.2 | 9.6  | 2107.6 | 12 | -3.4 |
| Spot 92  | 234 | 371092.7  | 1.313 | 5.4 | 0.7 | 13.3 | 1.3 | 0.5 | 1.06 | 0.83587 | 2726.6 | 23.6 | 2703.8 | 12.0 | 2686.9 | 12 | -1.5 |
| Spot 93  | 96  | 91368.1   | 2.703 | 7.4 | 0.8 | 7.3  | 1.3 | 0.4 | 1.05 | 0.81056 | 2162.2 | 19.4 | 2154.8 | 11.6 | 2147.8 | 13 | -0.7 |
| Spot 94  | 55  | 59147.4   | 2.578 | 7.3 | 0.7 | 7.6  | 1.2 | 0.4 | 1.02 | 0.83378 | 2212.7 | 19.1 | 2187.5 | 11.0 | 2163.9 | 12 | -2.3 |
| Spot 95  | 156 | 153974.9  | 2.509 | 7.5 | 0.8 | 7.2  | 1.3 | 0.4 | 1.01 | 0.79077 | 2164.2 | 18.5 | 2139.9 | 11.4 | 2116.7 | 14 | -2.2 |
| Spot 96  | 277 | 2272253.5 | 1.453 | 7.2 | 0.5 | 7.6  | 0.9 | 0.4 | 0.77 | 0.82390 | 2170.2 | 14.2 | 2183.7 | 8.4  | 2196.5 | 9  | 1.2  |
| Spot 97  | 152 | 112548.6  | 1.847 | 5.4 | 0.5 | 13.3 | 1.1 | 0.5 | 0.92 | 0.86658 | 2705.4 | 20.4 | 2700.1 | 10.1 | 2696.2 | 9  | -0.3 |
| Spot 98  | 70  | 681592.3  | 1.128 | 7.8 | 1.1 | 6.8  | 1.6 | 0.4 | 1.13 | 0.70870 | 2093.5 | 20.2 | 2080.1 | 14.1 | 2066.8 | 20 | -1.3 |
| Spot 99  | 206 | 105054.8  | 2.045 | 7.5 | 0.4 | 7.4  | 0.9 | 0.4 | 0.77 | 0.88026 | 2199.5 | 14.4 | 2165.9 | 7.9  | 2134.2 | 7  | -3.1 |
| Spot 100 | 82  | 72652.7   | 2.533 | 7.2 | 0.8 | 7.8  | 1.2 | 0.4 | 0.93 | 0.77205 | 2227.8 | 17.6 | 2213.5 | 10.9 | 2200.3 | 13 | -1.2 |
| Spot 101 | 170 | 278866.9  | 1.818 | 7.7 | 0.7 | 6.8  | 1.2 | 0.4 | 1.01 | 0.80698 | 2085.1 | 17.9 | 2086.2 | 11.1 | 2087.3 | 13 | 0.1  |
| Spot 102 | 54  | 91029.8   | 0.816 | 7.6 | 1.0 | 6.7  | 1.5 | 0.4 | 1.07 | 0.72645 | 2038.7 | 18.8 | 2069.9 | 13.1 | 2101.0 | 18 | 3.0  |
| Spot 103 | 91  | 136924.9  | 2.338 | 7.4 | 0.6 | 7.5  | 1.2 | 0.4 | 0.97 | 0.83915 | 2196.1 | 18.0 | 2171.1 | 10.3 | 2147.5 | 11 | -2.3 |
| Spot 104 | 186 | 381575.7  | 1.252 | 8.5 | 0.5 | 5.6  | 0.9 | 0.3 | 0.76 | 0.85610 | 1918.3 | 12.6 | 1908.4 | 7.6  | 1897.7 | 8  | -1.1 |
| Spot 105 | 118 | 46916.5   | 1.762 | 7.3 | 0.9 | 7.7  | 1.4 | 0.4 | 1.13 | 0.79692 | 2235.5 | 21.4 | 2200.5 | 12.8 | 2168.1 | 15 | -3.1 |
| Spot 106 | 117 | 54663.1   | 1.876 | 7.1 | 0.7 | 7.7  | 1.3 | 0.4 | 1.14 | 0.85590 | 2176.3 | 21.1 | 2194.9 | 12.0 | 2212.3 | 12 | 1.6  |
| Spot 107 | 78  | 104552.4  | 1.417 | 5.4 | 0.6 | 13.1 | 1.0 | 0.5 | 0.78 | 0.81038 | 2700.7 | 17.2 | 2684.2 | 9.1  | 2671.9 | 9  | -1.1 |
| Spot 108 | 266 | 140094.6  | 1.935 | 5.3 | 0.6 | 13.1 | 1.1 | 0.5 | 0.92 | 0.83420 | 2667.4 | 20.2 | 2686.5 | 10.5 | 2701.0 | 10 | 1.2  |
| Spot 109 | 268 | 101586.7  | 1.799 | 7.2 | 0.6 | 7.6  | 1.1 | 0.4 | 0.90 | 0.82073 | 2186.7 | 16.7 | 2188.1 | 9.9  | 2189.4 | 11 | 0.1  |
| Spot 110 | 83  | 72482.4   | 0.871 | 7.5 | 0.7 | 7.2  | 1.2 | 0.4 | 1.01 | 0.80674 | 2138.1 | 18.3 | 2133.6 | 11.1 | 2129.2 | 13 | -0.4 |

|          |     |            |       |     |     |      |     |     |      |         |        |      |        |      |        |    |      |
|----------|-----|------------|-------|-----|-----|------|-----|-----|------|---------|--------|------|--------|------|--------|----|------|
| Spot 111 | 170 | 107713.2   | 1.736 | 7.3 | 0.7 | 7.2  | 1.3 | 0.4 | 1.08 | 0.83227 | 2116.6 | 19.5 | 2138.6 | 11.6 | 2159.8 | 13 | 2.0  |
| Spot 112 | 127 | 171669.9   | 1.831 | 7.2 | 0.7 | 7.6  | 1.2 | 0.4 | 0.94 | 0.78410 | 2188.3 | 17.5 | 2190.4 | 10.8 | 2192.4 | 13 | 0.2  |
| Spot 113 | 82  | 211480.1   | 1.666 | 3.7 | 0.7 | 24.6 | 1.1 | 0.7 | 0.86 | 0.76271 | 3279.4 | 22.2 | 3294.0 | 11.0 | 3302.9 | 11 | 0.7  |
| Spot 114 | 291 | 103589.3   | 1.383 | 7.6 | 0.5 | 6.9  | 1.0 | 0.4 | 0.81 | 0.84954 | 2101.9 | 14.6 | 2102.1 | 8.5  | 2102.4 | 9  | 0.0  |
| Spot 115 | 183 | 97952.3    | 0.698 | 7.9 | 0.7 | 6.7  | 1.1 | 0.4 | 0.90 | 0.79949 | 2100.8 | 16.1 | 2072.2 | 9.9  | 2043.9 | 12 | -2.8 |
| Spot 116 | 235 | 82504.1    | 1.577 | 8.5 | 0.7 | 5.4  | 1.0 | 0.3 | 0.78 | 0.76244 | 1879.6 | 12.7 | 1887.6 | 8.7  | 1896.4 | 12 | 0.9  |
| Spot 117 | 205 | 1253730.7  | 2.911 | 7.8 | 0.6 | 6.7  | 1.2 | 0.4 | 1.01 | 0.84319 | 2077.8 | 17.9 | 2072.0 | 10.6 | 2066.2 | 11 | -0.6 |
| Spot 118 | 210 | 82251.3    | 2.198 | 5.3 | 0.7 | 13.4 | 1.1 | 0.5 | 0.87 | 0.77865 | 2715.0 | 19.2 | 2710.4 | 10.5 | 2707.0 | 12 | -0.3 |
| Spot 119 | 391 | 292253.6   | 1.718 | 5.3 | 0.6 | 13.1 | 0.9 | 0.5 | 0.70 | 0.77936 | 2660.9 | 15.2 | 2683.9 | 8.4  | 2701.3 | 9  | 1.5  |
| Spot 120 | 228 | 9106363.6  | 1.677 | 8.6 | 0.7 | 5.4  | 1.1 | 0.3 | 0.91 | 0.79602 | 1874.4 | 14.8 | 1878.5 | 9.8  | 1883.1 | 12 | 0.5  |
| Spot 121 | 312 | 187756.8   | 1.979 | 8.5 | 0.6 | 5.4  | 1.1 | 0.3 | 0.92 | 0.84930 | 1870.8 | 14.9 | 1889.7 | 9.3  | 1910.5 | 10 | 2.1  |
| Spot 122 | 132 | 518379.4   | 2.257 | 7.5 | 0.7 | 7.2  | 1.1 | 0.4 | 0.84 | 0.78291 | 2170.1 | 15.4 | 2142.4 | 9.5  | 2116.0 | 12 | -2.6 |
| Spot 123 | 71  | 63392.1    | 1.492 | 5.4 | 0.6 | 13.1 | 1.0 | 0.5 | 0.82 | 0.82580 | 2704.2 | 18.2 | 2684.9 | 9.4  | 2670.3 | 9  | -1.3 |
| Spot 124 | 142 | 45581.1    | 3.279 | 7.5 | 0.8 | 7.3  | 1.4 | 0.4 | 1.15 | 0.83717 | 2156.7 | 21.1 | 2143.1 | 12.3 | 2130.0 | 13 | -1.3 |
| Spot 125 | 133 | 94448.3    | 1.935 | 8.3 | 0.8 | 5.9  | 1.2 | 0.4 | 0.87 | 0.71918 | 1964.4 | 14.8 | 1956.6 | 10.5 | 1948.3 | 15 | -0.8 |
| Spot 126 | 292 | 116381.9   | 2.116 | 8.5 | 0.7 | 5.4  | 1.1 | 0.3 | 0.90 | 0.80979 | 1886.5 | 14.8 | 1890.5 | 9.6  | 1894.9 | 12 | 0.4  |
| Spot 127 | 629 | 275078.9   | 0.897 | 7.4 | 0.5 | 7.2  | 0.9 | 0.4 | 0.74 | 0.85364 | 2118.7 | 13.4 | 2137.3 | 7.8  | 2155.3 | 8  | 1.7  |
| Spot 128 | 144 | 169089.9   | 2.683 | 7.5 | 0.6 | 7.2  | 1.1 | 0.4 | 0.94 | 0.82283 | 2133.6 | 17.1 | 2134.0 | 10.2 | 2134.3 | 11 | 0.0  |
| Spot 129 | 57  | 120626.4   | 1.510 | 4.6 | 0.7 | 17.3 | 1.1 | 0.6 | 0.85 | 0.75670 | 2943.2 | 20.0 | 2951.9 | 10.8 | 2957.9 | 12 | 0.5  |
| Spot 130 | 308 | 307765.0   | 2.122 | 5.3 | 0.7 | 13.2 | 1.2 | 0.5 | 0.99 | 0.81390 | 2668.8 | 21.6 | 2697.2 | 11.5 | 2718.5 | 12 | 1.8  |
| Spot 131 | 63  | 62326.0    | 1.598 | 7.3 | 0.7 | 7.5  | 1.1 | 0.4 | 0.82 | 0.75746 | 2168.6 | 15.2 | 2167.3 | 9.7  | 2166.0 | 12 | -0.1 |
| Spot 132 | 231 | 141941.5   | 1.245 | 7.5 | 0.6 | 7.2  | 1.1 | 0.4 | 0.86 | 0.80154 | 2146.2 | 15.7 | 2142.1 | 9.6  | 2138.1 | 11 | -0.4 |
| Spot 133 | 117 | 88513.4    | 2.352 | 7.5 | 0.7 | 7.2  | 1.5 | 0.4 | 1.29 | 0.87278 | 2135.1 | 23.5 | 2131.0 | 13.2 | 2127.1 | 13 | -0.4 |
| Spot 134 | 143 | 159890.9   | 3.608 | 7.2 | 0.6 | 7.8  | 1.1 | 0.4 | 0.94 | 0.85245 | 2222.0 | 17.7 | 2207.1 | 9.9  | 2193.2 | 10 | -1.3 |
| Spot 135 | 130 | 101898.1   | 1.837 | 7.5 | 0.7 | 7.4  | 1.2 | 0.4 | 0.95 | 0.82343 | 2187.3 | 17.7 | 2155.2 | 10.4 | 2124.7 | 12 | -2.9 |
| Spot 136 | 197 | 511166.9   | 1.730 | 7.0 | 0.5 | 8.0  | 0.8 | 0.4 | 0.65 | 0.78911 | 2218.6 | 12.1 | 2231.3 | 7.4  | 2243.0 | 9  | 1.1  |
| Spot 137 | 241 | 292606.0   | 1.853 | 7.1 | 0.6 | 7.8  | 1.2 | 0.4 | 1.02 | 0.85274 | 2198.5 | 19.0 | 2206.8 | 10.8 | 2214.4 | 11 | 0.7  |
| Spot 138 | 259 | 192772.4   | 1.499 | 7.6 | 0.6 | 6.9  | 1.0 | 0.4 | 0.83 | 0.81293 | 2070.5 | 14.6 | 2092.5 | 9.0  | 2114.2 | 10 | 2.1  |
| Spot 139 | 135 | 49321.8    | 1.107 | 7.6 | 0.6 | 7.0  | 1.1 | 0.4 | 0.95 | 0.83071 | 2119.7 | 17.2 | 2114.3 | 10.2 | 2109.0 | 11 | -0.5 |
| Spot 140 | 128 | 23122089.1 | 1.297 | 8.6 | 0.8 | 5.4  | 1.2 | 0.3 | 0.92 | 0.76703 | 1905.6 | 15.1 | 1890.5 | 10.2 | 1874.0 | 14 | -1.7 |
| Spot 141 | 104 | 61971.0    | 2.307 | 3.7 | 0.6 | 25.0 | 1.2 | 0.7 | 1.06 | 0.85359 | 3330.8 | 27.5 | 3307.5 | 12.1 | 3293.5 | 10 | -1.1 |
| Spot 142 | 582 | 414851.9   | 1.005 | 7.4 | 0.6 | 7.2  | 1.1 | 0.4 | 0.88 | 0.81265 | 2116.9 | 15.8 | 2136.4 | 9.6  | 2155.2 | 11 | 1.8  |
| Spot 143 | 218 | 1668716.3  | 4.039 | 7.6 | 0.6 | 7.1  | 1.1 | 0.4 | 0.94 | 0.83008 | 2131.1 | 17.1 | 2118.6 | 10.1 | 2106.5 | 11 | -1.2 |
| Spot 144 | 67  | 39402.4    | 1.888 | 7.6 | 0.9 | 7.2  | 1.4 | 0.4 | 1.08 | 0.76919 | 2167.0 | 19.9 | 2138.1 | 12.5 | 2110.5 | 16 | -2.7 |
| Spot 145 | 257 | 362577.4   | 2.172 | 5.5 | 0.6 | 12.7 | 1.0 | 0.5 | 0.73 | 0.75255 | 2648.8 | 15.9 | 2658.2 | 9.2  | 2665.4 | 11 | 0.6  |
| Spot 146 | 78  | 97526.3    | 2.316 | 8.5 | 0.7 | 5.5  | 1.2 | 0.3 | 0.95 | 0.78601 | 1903.3 | 15.6 | 1906.0 | 10.4 | 1909.0 | 13 | 0.3  |
| Spot 147 | 125 | 145570.0   | 1.719 | 7.0 | 0.7 | 8.1  | 1.4 | 0.4 | 1.20 | 0.85803 | 2243.4 | 22.7 | 2240.3 | 12.6 | 2237.4 | 12 | -0.3 |
| Spot 148 | 244 | 320139.7   | 2.217 | 5.3 | 0.7 | 13.1 | 1.0 | 0.5 | 0.79 | 0.75597 | 2670.3 | 17.3 | 2688.7 | 9.9  | 2702.5 | 11 | 1.2  |
| Spot 149 | 93  | 46265.7    | 1.749 | 7.5 | 0.7 | 7.2  | 1.3 | 0.4 | 1.10 | 0.83689 | 2163.3 | 20.3 | 2139.2 | 11.8 | 2116.1 | 13 | -2.2 |
| Spot 150 | 293 | 101685.7   | 1.255 | 4.9 | 0.6 | 15.4 | 1.1 | 0.6 | 0.91 | 0.82712 | 2828.0 | 20.8 | 2839.5 | 10.5 | 2847.7 | 10 | 0.7  |
| Spot 151 | 240 | 861158.9   | 1.769 | 7.2 | 0.5 | 7.7  | 0.9 | 0.4 | 0.70 | 0.80963 | 2195.7 | 13.0 | 2192.7 | 7.7  | 2189.8 | 9  | -0.3 |
| Spot 152 | 242 | 115206.6   | 2.261 | 5.4 | 0.7 | 13.1 | 1.1 | 0.5 | 0.92 | 0.80532 | 2678.6 | 20.1 | 2688.0 | 10.8 | 2695.0 | 11 | 0.6  |
| Spot 153 | 117 | 118887.8   | 1.154 | 7.1 | 0.8 | 8.0  | 1.1 | 0.4 | 0.78 | 0.69944 | 2245.1 | 14.8 | 2228.5 | 10.0 | 2213.4 | 14 | -1.4 |

|          |     |           |       |     |     |      |     |     |      |         |        |      |        |      |        |    |      |
|----------|-----|-----------|-------|-----|-----|------|-----|-----|------|---------|--------|------|--------|------|--------|----|------|
| Spot 154 | 88  | 46233.3   | 2.392 | 8.6 | 0.6 | 5.4  | 1.0 | 0.3 | 0.75 | 0.77732 | 1898.0 | 12.3 | 1888.7 | 8.2  | 1878.6 | 11 | -1.0 |
| Spot 155 | 246 | 437854.8  | 1.285 | 4.8 | 0.5 | 15.4 | 0.9 | 0.5 | 0.73 | 0.82304 | 2808.6 | 16.6 | 2841.5 | 8.4  | 2864.8 | 8  | 2.0  |
| Spot 156 | 137 | 30913.2   | 2.901 | 7.4 | 0.7 | 7.3  | 1.2 | 0.4 | 0.97 | 0.81813 | 2137.9 | 17.7 | 2142.7 | 10.6 | 2147.2 | 12 | 0.4  |
| Spot 157 | 88  | 34861.7   | 2.196 | 7.4 | 0.6 | 7.2  | 1.1 | 0.4 | 0.92 | 0.83741 | 2133.7 | 16.7 | 2141.9 | 9.8  | 2149.8 | 10 | 0.7  |
| Spot 158 | 300 | 90787.0   | 1.733 | 8.5 | 0.4 | 5.4  | 0.8 | 0.3 | 0.68 | 0.86267 | 1881.1 | 11.2 | 1890.5 | 6.8  | 1900.8 | 7  | 1.0  |
| Spot 159 | 226 | 90345.4   | 1.848 | 7.3 | 0.5 | 7.6  | 0.9 | 0.4 | 0.71 | 0.81959 | 2188.6 | 13.2 | 2182.0 | 7.8  | 2175.9 | 9  | -0.6 |
| Spot 160 | 717 | 6105691.5 | 2.023 | 7.3 | 0.6 | 7.4  | 1.3 | 0.4 | 1.12 | 0.88466 | 2149.7 | 20.5 | 2165.2 | 11.3 | 2180.0 | 10 | 1.4  |
| Spot 161 | 60  | 204190.6  | 1.934 | 7.3 | 0.6 | 7.3  | 1.2 | 0.4 | 1.00 | 0.85111 | 2128.6 | 18.1 | 2146.2 | 10.5 | 2163.1 | 11 | 1.6  |
| Spot 162 | 321 | 831601.5  | 1.743 | 8.5 | 0.6 | 5.5  | 0.9 | 0.3 | 0.69 | 0.75194 | 1884.4 | 11.3 | 1898.6 | 7.9  | 1914.2 | 11 | 1.6  |
| Spot 163 | 280 | 100285.3  | 2.361 | 5.4 | 0.6 | 13.0 | 1.0 | 0.5 | 0.78 | 0.78768 | 2660.5 | 16.9 | 2676.9 | 9.3  | 2689.3 | 10 | 1.1  |
| Spot 164 | 231 | 810341.2  | 2.063 | 5.4 | 0.6 | 13.0 | 0.9 | 0.5 | 0.75 | 0.80266 | 2668.1 | 16.5 | 2682.8 | 8.9  | 2693.9 | 9  | 1.0  |
| Spot 165 | 92  | 1176461.7 | 2.030 | 3.9 | 0.6 | 22.2 | 1.1 | 0.6 | 0.90 | 0.83649 | 3164.9 | 22.6 | 3190.7 | 10.5 | 3206.9 | 9  | 1.3  |
| Spot 166 | 218 | 213809.8  | 1.759 | 7.6 | 0.5 | 7.0  | 1.0 | 0.4 | 0.82 | 0.84263 | 2124.2 | 14.9 | 2111.9 | 8.7  | 2099.9 | 9  | -1.2 |
| Spot 167 | 61  | 58461.4   | 1.737 | 7.3 | 0.7 | 7.6  | 1.2 | 0.4 | 1.02 | 0.84151 | 2210.2 | 19.1 | 2186.9 | 10.9 | 2165.2 | 11 | -2.1 |
| Spot 168 | 140 | 65979.4   | 2.341 | 7.6 | 0.7 | 7.3  | 1.0 | 0.4 | 0.76 | 0.74815 | 2183.0 | 14.1 | 2146.7 | 9.1  | 2112.1 | 12 | -3.4 |
| Spot 169 | 103 | 78024.1   | 0.916 | 7.5 | 0.7 | 7.4  | 1.2 | 0.4 | 1.04 | 0.83879 | 2195.2 | 19.4 | 2165.2 | 11.1 | 2137.0 | 12 | -2.7 |
| Spot 170 | 231 | 181175.3  | 1.461 | 7.2 | 0.7 | 7.6  | 1.2 | 0.4 | 0.98 | 0.82956 | 2161.8 | 18.0 | 2179.8 | 10.6 | 2196.7 | 11 | 1.6  |
| Spot 171 | 88  | 64720.8   | 1.631 | 7.8 | 0.6 | 6.5  | 1.2 | 0.4 | 1.05 | 0.85063 | 2032.1 | 18.3 | 2044.1 | 10.9 | 2056.1 | 11 | 1.2  |
| Spot 172 | 376 | 428988.9  | 2.257 | 5.3 | 0.7 | 13.2 | 1.3 | 0.5 | 1.08 | 0.82816 | 2668.0 | 23.7 | 2691.7 | 12.4 | 2709.5 | 12 | 1.5  |
| Spot 173 | 69  | 185356.0  | 1.178 | 5.2 | 0.6 | 14.5 | 1.1 | 0.6 | 0.93 | 0.83956 | 2837.1 | 21.4 | 2786.1 | 10.5 | 2749.4 | 10 | -3.2 |
| Spot 174 | 240 | 468529.6  | 2.064 | 7.5 | 0.7 | 7.1  | 1.2 | 0.4 | 1.02 | 0.82576 | 2120.0 | 18.4 | 2124.5 | 11.0 | 2128.8 | 12 | 0.4  |
| Spot 175 | 243 | 185450.3  | 1.898 | 5.3 | 0.6 | 13.2 | 1.2 | 0.5 | 0.99 | 0.85178 | 2657.2 | 21.5 | 2695.7 | 10.9 | 2724.6 | 10 | 2.5  |
| Spot 176 | 240 | 113225.6  | 1.932 | 5.4 | 0.5 | 13.2 | 0.7 | 0.5 | 0.55 | 0.75441 | 2683.8 | 12.0 | 2690.6 | 6.8  | 2695.7 | 8  | 0.4  |
| Spot 177 | 237 | 111679.0  | 2.168 | 5.3 | 0.6 | 13.0 | 1.2 | 0.5 | 0.99 | 0.84108 | 2635.1 | 21.4 | 2680.9 | 11.1 | 2715.6 | 11 | 3.0  |
| Spot 178 | 103 | 120051.0  | 2.120 | 9.0 | 0.8 | 4.9  | 1.3 | 0.3 | 1.00 | 0.79576 | 1793.8 | 15.6 | 1796.5 | 10.5 | 1799.6 | 14 | 0.3  |
| Spot 179 | 185 | 623008.9  | 3.300 | 7.5 | 0.8 | 7.3  | 1.2 | 0.4 | 0.86 | 0.72243 | 2168.6 | 15.9 | 2153.7 | 10.7 | 2139.4 | 14 | -1.4 |
| Spot 180 | 397 | 1137328.5 | 3.358 | 4.8 | 0.7 | 15.8 | 1.3 | 0.6 | 1.12 | 0.85951 | 2838.9 | 25.6 | 2865.8 | 12.4 | 2884.7 | 11 | 1.6  |
| Spot 181 | 95  | 72798.9   | 2.276 | 7.6 | 0.8 | 7.1  | 1.3 | 0.4 | 1.10 | 0.82151 | 2130.4 | 20.0 | 2122.6 | 12.0 | 2115.1 | 13 | -0.7 |
| Spot 182 | 95  | 63800.3   | 0.837 | 6.1 | 0.6 | 10.5 | 1.0 | 0.5 | 0.81 | 0.78752 | 2499.0 | 16.8 | 2483.6 | 9.6  | 2471.1 | 11 | -1.1 |
| Spot 183 | 371 | 5967409.7 | 1.923 | 5.3 | 0.5 | 13.2 | 1.0 | 0.5 | 0.85 | 0.85411 | 2651.5 | 18.5 | 2690.5 | 9.4  | 2720.0 | 9  | 2.5  |
| Spot 184 | 304 | 204925.5  | 2.160 | 3.5 | 0.6 | 27.2 | 1.0 | 0.7 | 0.86 | 0.84061 | 3378.5 | 22.5 | 3389.9 | 10.0 | 3396.6 | 9  | 0.5  |
| Spot 185 | 248 | 492261.3  | 2.281 | 7.4 | 0.6 | 7.4  | 0.9 | 0.4 | 0.65 | 0.74894 | 2166.8 | 11.9 | 2155.6 | 7.7  | 2144.9 | 10 | -1.0 |
| Spot 186 | 69  | 118990.5  | 2.603 | 6.9 | 0.8 | 8.5  | 1.3 | 0.4 | 1.05 | 0.78270 | 2296.3 | 20.2 | 2285.7 | 12.2 | 2276.3 | 14 | -0.9 |
| Spot 187 | 144 | 106328.6  | 1.386 | 7.2 | 0.5 | 7.8  | 1.1 | 0.4 | 0.91 | 0.85661 | 2209.1 | 17.0 | 2209.0 | 9.6  | 2208.8 | 10 | 0.0  |
| Spot 188 | 595 | 516765.3  | 1.465 | 7.4 | 0.6 | 7.0  | 1.0 | 0.4 | 0.79 | 0.77883 | 2075.1 | 14.0 | 2112.7 | 9.0  | 2149.4 | 11 | 3.5  |
| Spot 189 | 43  | 186429.9  | 0.771 | 6.1 | 0.8 | 10.8 | 1.2 | 0.5 | 0.97 | 0.77920 | 2535.5 | 20.4 | 2505.7 | 11.6 | 2481.6 | 13 | -2.2 |
| Spot 190 | 176 | 284176.8  | 2.568 | 5.4 | 0.7 | 13.1 | 1.1 | 0.5 | 0.90 | 0.80234 | 2705.5 | 19.8 | 2690.4 | 10.6 | 2679.1 | 11 | -1.0 |
| Spot 191 | 149 | 125112.5  | 2.337 | 5.5 | 0.6 | 12.6 | 0.9 | 0.5 | 0.73 | 0.77391 | 2648.3 | 15.8 | 2653.5 | 8.8  | 2657.5 | 10 | 0.3  |
| Spot 192 | 191 | 170937.4  | 1.069 | 7.5 | 0.7 | 6.9  | 1.1 | 0.4 | 0.86 | 0.79618 | 2051.4 | 15.2 | 2093.3 | 9.6  | 2134.7 | 11 | 3.9  |
| Spot 193 | 64  | 67263.7   | 0.814 | 7.6 | 0.8 | 7.1  | 1.2 | 0.4 | 0.83 | 0.70318 | 2156.5 | 15.2 | 2130.0 | 10.5 | 2104.6 | 15 | -2.5 |
| Spot 194 | 199 | 711886.8  | 2.182 | 5.7 | 0.5 | 11.9 | 1.0 | 0.5 | 0.84 | 0.84018 | 2579.0 | 17.9 | 2598.7 | 9.4  | 2614.1 | 9  | 1.3  |
| Spot 195 | 185 | 110456.0  | 1.421 | 7.6 | 0.7 | 6.9  | 1.1 | 0.4 | 0.85 | 0.78238 | 2090.3 | 15.1 | 2095.8 | 9.6  | 2101.1 | 12 | 0.5  |
| Spot 196 | 78  | 23343.8   | 1.335 | 7.0 | 0.9 | 7.7  | 1.3 | 0.4 | 0.91 | 0.70893 | 2151.8 | 16.7 | 2196.1 | 11.6 | 2237.7 | 16 | 3.8  |

|          |     |            |       |     |     |      |     |     |      |         |        |      |        |      |        |    |      |
|----------|-----|------------|-------|-----|-----|------|-----|-----|------|---------|--------|------|--------|------|--------|----|------|
| Spot 197 | 242 | 88072.5    | 1.763 | 8.5 | 0.8 | 5.5  | 1.2 | 0.3 | 0.87 | 0.74474 | 1894.7 | 14.3 | 1900.7 | 10.1 | 1907.2 | 14 | 0.7  |
| Spot 198 | 142 | 114047.2   | 1.316 | 7.3 | 0.7 | 7.8  | 1.2 | 0.4 | 0.98 | 0.80519 | 2241.3 | 18.6 | 2212.0 | 11.0 | 2185.0 | 13 | -2.6 |
| Spot 199 | 258 | 354241.3   | 1.400 | 7.5 | 0.5 | 7.0  | 1.1 | 0.4 | 0.97 | 0.87127 | 2106.5 | 17.5 | 2116.3 | 9.9  | 2125.8 | 10 | 0.9  |
| Spot 200 | 180 | 111442.2   | 1.546 | 7.5 | 0.7 | 7.2  | 1.2 | 0.4 | 0.98 | 0.82127 | 2138.2 | 17.9 | 2137.5 | 10.7 | 2136.8 | 12 | -0.1 |
| Spot 201 | 172 | 94888.5    | 1.686 | 7.5 | 0.6 | 7.1  | 1.2 | 0.4 | 0.99 | 0.85781 | 2122.8 | 18.0 | 2123.3 | 10.3 | 2123.8 | 10 | 0.0  |
| Spot 202 | 138 | 110292.3   | 1.549 | 5.4 | 0.7 | 13.0 | 1.3 | 0.5 | 1.08 | 0.83656 | 2670.8 | 23.7 | 2679.9 | 12.2 | 2686.8 | 12 | 0.6  |
| Spot 203 | 61  | 295710.3   | 3.568 | 7.4 | 0.8 | 7.4  | 1.3 | 0.4 | 1.09 | 0.81978 | 2167.4 | 20.0 | 2165.6 | 11.9 | 2163.9 | 13 | -0.2 |
| Spot 204 | 238 | 11174801.6 | 1.073 | 7.5 | 0.5 | 7.2  | 0.8 | 0.4 | 0.66 | 0.79018 | 2142.4 | 12.0 | 2137.6 | 7.4  | 2133.0 | 9  | -0.4 |
| Spot 205 | 71  | 175100.3   | 1.978 | 5.3 | 0.7 | 13.3 | 1.1 | 0.5 | 0.86 | 0.78911 | 2681.4 | 19.0 | 2701.8 | 10.4 | 2717.1 | 11 | 1.3  |
| Spot 206 | 207 | 340493.1   | 2.228 | 5.4 | 0.7 | 13.1 | 1.2 | 0.5 | 0.94 | 0.79534 | 2662.2 | 20.5 | 2686.1 | 11.1 | 2704.1 | 12 | 1.6  |
| Spot 207 | 147 | 106228.7   | 4.460 | 7.0 | 0.7 | 8.2  | 1.3 | 0.4 | 1.04 | 0.82918 | 2246.9 | 19.7 | 2252.0 | 11.3 | 2256.5 | 12 | 0.4  |
| Spot 208 | 116 | 86954.9    | 1.491 | 7.7 | 0.7 | 6.8  | 1.3 | 0.4 | 1.09 | 0.84270 | 2087.9 | 19.4 | 2086.3 | 11.4 | 2084.7 | 12 | -0.2 |
| Spot 209 | 159 | 371035.5   | 1.683 | 7.5 | 0.7 | 7.3  | 1.2 | 0.4 | 1.00 | 0.80121 | 2155.6 | 18.3 | 2148.9 | 11.1 | 2142.5 | 13 | -0.6 |
| Spot 210 | 219 | 858257.9   | 1.720 | 8.6 | 0.6 | 5.5  | 1.0 | 0.3 | 0.84 | 0.83442 | 1897.4 | 13.8 | 1896.1 | 8.6  | 1894.6 | 10 | -0.1 |
| Spot 211 | 282 | 1278334.3  | 1.918 | 5.4 | 0.5 | 13.1 | 0.8 | 0.5 | 0.65 | 0.77013 | 2670.5 | 14.2 | 2689.0 | 7.9  | 2702.9 | 9  | 1.2  |
| Spot 212 | 186 | 188032.7   | 2.605 | 5.3 | 0.5 | 13.0 | 1.0 | 0.5 | 0.83 | 0.83567 | 2645.3 | 18.1 | 2680.1 | 9.4  | 2706.4 | 9  | 2.3  |
| Spot 213 | 326 | 135284.3   | 0.643 | 7.4 | 0.5 | 7.3  | 0.8 | 0.4 | 0.61 | 0.78127 | 2147.7 | 11.2 | 2151.9 | 7.0  | 2155.8 | 9  | 0.4  |
| Spot 214 | 196 | 510550.4   | 1.407 | 8.6 | 0.5 | 5.5  | 1.0 | 0.3 | 0.86 | 0.86655 | 1906.9 | 14.2 | 1893.8 | 8.5  | 1879.4 | 9  | -1.5 |
| Spot 215 | 133 | 113760.4   | 3.268 | 7.4 | 0.6 | 7.5  | 1.0 | 0.4 | 0.79 | 0.80250 | 2186.1 | 14.7 | 2174.0 | 8.9  | 2162.7 | 10 | -1.1 |
| Spot 216 | 119 | 80555.1    | 2.177 | 7.5 | 0.8 | 7.1  | 1.4 | 0.4 | 1.07 | 0.78876 | 2118.4 | 19.2 | 2121.4 | 12.0 | 2124.4 | 15 | 0.3  |
| Spot 217 | 71  | 68600.0    | 1.928 | 7.3 | 0.7 | 7.5  | 1.1 | 0.4 | 0.92 | 0.81358 | 2162.1 | 16.8 | 2170.9 | 10.1 | 2179.3 | 11 | 0.8  |
| Spot 218 | 101 | 116469.3   | 2.459 | 6.9 | 0.8 | 8.2  | 1.4 | 0.4 | 1.17 | 0.82755 | 2228.1 | 22.1 | 2254.8 | 12.9 | 2279.1 | 14 | 2.2  |
| Spot 219 | 114 | 94454.2    | 0.910 | 5.3 | 0.7 | 13.7 | 1.3 | 0.5 | 1.11 | 0.85080 | 2744.2 | 24.9 | 2731.1 | 12.4 | 2721.4 | 11 | -0.8 |
| Spot 220 | 188 | 969906.9   | 2.278 | 7.6 | 0.6 | 7.0  | 1.5 | 0.4 | 1.34 | 0.90388 | 2125.2 | 24.3 | 2114.9 | 13.2 | 2105.0 | 11 | -1.0 |
| Spot 221 | 105 | 99212.3    | 0.934 | 8.0 | 0.6 | 6.5  | 1.1 | 0.4 | 0.91 | 0.82742 | 2077.6 | 16.1 | 2052.3 | 9.7  | 2027.0 | 11 | -2.5 |
| Spot 222 | 146 | 91417.0    | 2.144 | 7.3 | 0.6 | 7.9  | 1.1 | 0.4 | 0.88 | 0.81797 | 2254.6 | 16.7 | 2220.6 | 9.7  | 2189.4 | 11 | -3.0 |
| Spot 223 | 235 | 1592238.0  | 1.260 | 4.7 | 0.5 | 16.6 | 1.0 | 0.6 | 0.90 | 0.86687 | 2908.5 | 21.1 | 2914.6 | 10.0 | 2918.8 | 8  | 0.4  |
| Spot 224 | 150 | 55003.9    | 2.279 | 7.6 | 0.8 | 7.0  | 1.5 | 0.4 | 1.26 | 0.83601 | 2106.9 | 22.7 | 2106.1 | 13.4 | 2105.3 | 15 | -0.1 |
| Spot 225 | 403 | 231829.7   | 1.357 | 7.2 | 0.6 | 7.6  | 1.2 | 0.4 | 0.96 | 0.83091 | 2170.7 | 17.6 | 2185.6 | 10.3 | 2199.6 | 11 | 1.3  |
| Spot 226 | 104 | 65915.7    | 2.479 | 7.5 | 0.7 | 7.3  | 1.1 | 0.4 | 0.88 | 0.77060 | 2149.8 | 16.1 | 2145.1 | 10.2 | 2140.6 | 13 | -0.4 |
| Spot 227 | 177 | 95521.6    | 2.064 | 8.6 | 0.8 | 5.4  | 1.3 | 0.3 | 1.04 | 0.78765 | 1882.4 | 16.9 | 1888.0 | 11.3 | 1894.2 | 15 | 0.6  |
| Spot 228 | 93  | 1468625.3  | 1.833 | 8.1 | 0.7 | 6.2  | 1.2 | 0.4 | 0.99 | 0.80614 | 2001.2 | 17.0 | 2001.1 | 10.7 | 2001.0 | 13 | 0.0  |
| Spot 229 | 179 | 102465.1   | 1.554 | 8.6 | 0.7 | 5.4  | 1.3 | 0.3 | 1.06 | 0.84174 | 1902.0 | 17.5 | 1891.9 | 10.8 | 1880.7 | 12 | -1.1 |
| Spot 230 | 246 | 445388.4   | 1.880 | 8.6 | 0.7 | 5.4  | 1.1 | 0.3 | 0.90 | 0.81058 | 1878.1 | 14.7 | 1889.0 | 9.5  | 1900.9 | 12 | 1.2  |
| Spot 231 | 150 | 2465201.1  | 2.160 | 7.4 | 0.7 | 7.4  | 1.2 | 0.4 | 0.94 | 0.79538 | 2153.8 | 17.2 | 2156.7 | 10.6 | 2159.3 | 12 | 0.3  |
| Spot 232 | 214 | 87589.0    | 1.699 | 7.5 | 0.6 | 7.2  | 1.1 | 0.4 | 0.95 | 0.84704 | 2120.2 | 17.1 | 2132.1 | 10.0 | 2143.6 | 10 | 1.1  |
| Spot 233 | 440 | 205865.9   | 1.577 | 7.5 | 0.7 | 7.0  | 1.2 | 0.4 | 0.99 | 0.83005 | 2096.3 | 17.8 | 2117.6 | 10.7 | 2138.4 | 12 | 2.0  |
| Spot 234 | 215 | 105047.9   | 1.701 | 6.1 | 0.7 | 10.3 | 1.3 | 0.5 | 1.08 | 0.83117 | 2440.8 | 22.0 | 2463.5 | 12.1 | 2482.3 | 12 | 1.7  |
| Spot 235 | 163 | 73713.1    | 1.773 | 7.6 | 0.8 | 7.0  | 1.2 | 0.4 | 0.91 | 0.75047 | 2112.7 | 16.5 | 2109.0 | 10.8 | 2105.3 | 14 | -0.3 |
| Spot 236 | 59  | 90688.7    | 1.759 | 7.7 | 0.6 | 6.8  | 1.2 | 0.4 | 0.98 | 0.83291 | 2076.9 | 17.3 | 2086.9 | 10.4 | 2096.8 | 11 | 0.9  |
| Spot 237 | 181 | 143428.0   | 2.663 | 5.3 | 0.7 | 13.1 | 1.0 | 0.5 | 0.77 | 0.74618 | 2646.3 | 16.7 | 2684.3 | 9.7  | 2713.0 | 11 | 2.5  |
| Spot 238 | 441 | 262137.7   | 3.019 | 7.6 | 0.7 | 7.0  | 1.4 | 0.4 | 1.14 | 0.83789 | 2114.2 | 20.6 | 2115.1 | 12.1 | 2115.8 | 13 | 0.1  |
| Spot 239 | 57  | 36261.1    | 2.230 | 6.3 | 0.8 | 9.9  | 1.3 | 0.5 | 0.96 | 0.76015 | 2420.6 | 19.4 | 2421.1 | 11.7 | 2421.5 | 14 | 0.0  |

|          |     |            |       |     |     |      |     |     |      |         |        |      |        |      |        |    |      |
|----------|-----|------------|-------|-----|-----|------|-----|-----|------|---------|--------|------|--------|------|--------|----|------|
| Spot 240 | 215 | 130296.6   | 1.770 | 7.3 | 0.8 | 7.5  | 1.2 | 0.4 | 0.94 | 0.76045 | 2155.0 | 17.2 | 2167.6 | 11.1 | 2179.6 | 14 | 1.1  |
| Spot 241 | 117 | 1462158.6  | 1.035 | 8.0 | 0.8 | 6.4  | 1.5 | 0.4 | 1.19 | 0.81712 | 2039.1 | 20.7 | 2032.8 | 12.7 | 2026.4 | 15 | -0.6 |
| Spot 242 | 268 | 171115.8   | 1.980 | 7.7 | 0.6 | 6.9  | 1.3 | 0.4 | 1.08 | 0.85793 | 2089.3 | 19.3 | 2092.5 | 11.2 | 2095.7 | 11 | 0.3  |
| Spot 243 | 173 | 267671.0   | 2.653 | 5.3 | 0.6 | 13.7 | 0.9 | 0.5 | 0.73 | 0.77854 | 2739.2 | 16.4 | 2730.1 | 8.9  | 2723.3 | 10 | -0.6 |
| Spot 244 | 74  | 49972.3    | 1.790 | 6.0 | 0.6 | 10.8 | 0.8 | 0.5 | 0.62 | 0.74118 | 2509.5 | 13.0 | 2507.3 | 7.8  | 2505.6 | 9  | -0.2 |
| Spot 245 | 159 | 207404.2   | 1.482 | 7.6 | 0.6 | 7.0  | 0.9 | 0.4 | 0.76 | 0.80024 | 2105.5 | 13.6 | 2110.3 | 8.4  | 2114.8 | 10 | 0.4  |
| Spot 246 | 271 | 164267.0   | 0.937 | 7.6 | 0.5 | 7.1  | 0.9 | 0.4 | 0.66 | 0.77461 | 2131.0 | 12.0 | 2124.0 | 7.6  | 2117.2 | 9  | -0.7 |
| Spot 247 | 150 | 1780083.4  | 1.824 | 5.4 | 0.6 | 12.8 | 1.1 | 0.5 | 0.87 | 0.80773 | 2634.5 | 18.8 | 2663.0 | 10.1 | 2684.6 | 10 | 1.9  |
| Spot 248 | 112 | 68312.0    | 1.107 | 7.5 | 0.7 | 7.2  | 1.3 | 0.4 | 1.01 | 0.80423 | 2140.0 | 18.4 | 2136.0 | 11.2 | 2132.1 | 13 | -0.4 |
| Spot 249 | 42  | 72512.9    | 2.364 | 7.2 | 0.8 | 7.9  | 1.3 | 0.4 | 1.05 | 0.79705 | 2225.1 | 19.7 | 2215.0 | 11.8 | 2205.6 | 14 | -0.9 |
| Spot 250 | 67  | 172061.7   | 1.853 | 7.3 | 0.7 | 7.5  | 1.2 | 0.4 | 0.91 | 0.77987 | 2158.5 | 16.7 | 2173.4 | 10.5 | 2187.6 | 13 | 1.3  |
| Spot 251 | 87  | 107659.3   | 1.781 | 6.7 | 0.7 | 9.0  | 1.2 | 0.4 | 1.00 | 0.83103 | 2340.6 | 19.6 | 2341.5 | 11.0 | 2342.2 | 11 | 0.1  |
| Spot 252 | 54  | 24537.8    | 2.163 | 7.2 | 0.6 | 8.0  | 1.1 | 0.4 | 0.91 | 0.82413 | 2260.2 | 17.4 | 2227.8 | 10.0 | 2198.1 | 11 | -2.8 |
| Spot 253 | 109 | 91106.6    | 2.138 | 7.8 | 0.8 | 6.8  | 1.2 | 0.4 | 0.91 | 0.73479 | 2087.5 | 16.2 | 2080.4 | 11.0 | 2073.2 | 15 | -0.7 |
| Spot 254 | 261 | 133585.5   | 2.062 | 5.4 | 0.5 | 13.0 | 0.8 | 0.5 | 0.63 | 0.81148 | 2638.0 | 13.6 | 2676.2 | 7.3  | 2705.2 | 7  | 2.5  |
| Spot 255 | 211 | 74407.8    | 2.527 | 7.3 | 0.8 | 7.3  | 1.3 | 0.4 | 1.04 | 0.78177 | 2105.8 | 18.7 | 2143.0 | 11.9 | 2178.9 | 14 | 3.4  |
| Spot 256 | 146 | 90704.7    | 3.220 | 5.0 | 0.6 | 14.8 | 1.0 | 0.5 | 0.80 | 0.81530 | 2802.5 | 18.1 | 2805.6 | 9.3  | 2807.8 | 9  | 0.2  |
| Spot 257 | 169 | 89781.7    | 2.454 | 7.3 | 0.7 | 7.4  | 1.1 | 0.4 | 0.93 | 0.80778 | 2158.3 | 17.0 | 2165.1 | 10.3 | 2171.5 | 12 | 0.6  |
| Spot 258 | 305 | 338965.5   | 2.957 | 5.4 | 0.7 | 13.3 | 1.1 | 0.5 | 0.89 | 0.79981 | 2697.6 | 19.5 | 2699.2 | 10.5 | 2700.4 | 11 | 0.1  |
| Spot 259 | 85  | 1550760.0  | 2.311 | 5.8 | 0.7 | 11.3 | 1.1 | 0.5 | 0.88 | 0.76931 | 2529.2 | 18.4 | 2549.0 | 10.6 | 2564.8 | 12 | 1.4  |
| Spot 260 | 184 | 221939.3   | 1.254 | 5.4 | 0.6 | 12.7 | 1.1 | 0.5 | 0.93 | 0.82096 | 2609.3 | 20.0 | 2659.7 | 10.7 | 2698.3 | 11 | 3.3  |
| Spot 261 | 148 | 142016.9   | 3.557 | 8.1 | 0.6 | 6.3  | 1.1 | 0.4 | 0.92 | 0.82906 | 2031.1 | 16.0 | 2012.2 | 9.7  | 1992.8 | 11 | -1.9 |
| Spot 263 | 110 | 41248.2    | 1.901 | 7.4 | 0.9 | 7.5  | 1.5 | 0.4 | 1.25 | 0.81746 | 2169.3 | 23.0 | 2167.2 | 13.7 | 2165.2 | 15 | -0.2 |
| Spot 265 | 179 | 574318.1   | 2.384 | 5.5 | 0.6 | 12.7 | 1.2 | 0.5 | 1.06 | 0.86939 | 2644.0 | 23.0 | 2655.6 | 11.5 | 2664.5 | 10 | 0.8  |
| Spot 266 | 311 | 543114.9   | 1.652 | 7.6 | 0.5 | 7.1  | 1.3 | 0.4 | 1.21 | 0.91064 | 2126.9 | 21.9 | 2120.4 | 11.8 | 2114.1 | 10 | -0.6 |
| Spot 267 | 248 | 94455.2    | 2.270 | 5.4 | 0.6 | 13.1 | 1.0 | 0.5 | 0.78 | 0.81435 | 2667.7 | 17.0 | 2689.5 | 9.0  | 2705.9 | 9  | 1.4  |
| Spot 268 | 94  | 131699.8   | 3.022 | 7.4 | 0.8 | 7.4  | 1.2 | 0.4 | 0.91 | 0.76504 | 2169.1 | 16.7 | 2164.7 | 10.6 | 2160.5 | 13 | -0.4 |
| Spot 269 | 136 | 61016.2    | 0.988 | 7.4 | 0.6 | 7.2  | 1.0 | 0.4 | 0.77 | 0.78814 | 2121.8 | 14.0 | 2139.7 | 8.8  | 2156.9 | 11 | 1.6  |
| Spot 270 | 289 | 187253.2   | 2.814 | 7.6 | 0.5 | 7.0  | 0.9 | 0.4 | 0.71 | 0.83061 | 2108.9 | 12.7 | 2107.0 | 7.6  | 2105.1 | 8  | -0.2 |
| Spot 271 | 81  | 28858577.8 | 1.933 | 3.8 | 0.8 | 23.8 | 1.3 | 0.7 | 1.09 | 0.81323 | 3248.9 | 27.8 | 3260.5 | 13.0 | 3267.6 | 12 | 0.6  |
| Spot 272 | 114 | 162852.0   | 1.648 | 7.4 | 0.7 | 7.4  | 1.5 | 0.4 | 1.28 | 0.87333 | 2158.0 | 23.5 | 2158.3 | 13.1 | 2158.6 | 12 | 0.0  |
| Spot 273 | 197 | 371751.3   | 2.024 | 8.6 | 0.7 | 5.4  | 1.0 | 0.3 | 0.78 | 0.75364 | 1889.6 | 12.8 | 1892.1 | 8.9  | 1894.8 | 12 | 0.3  |
| Spot 274 | 189 | 158219.8   | 1.868 | 7.6 | 0.6 | 7.1  | 1.0 | 0.4 | 0.85 | 0.82028 | 2148.8 | 15.6 | 2130.1 | 9.3  | 2112.0 | 10 | -1.7 |
| Spot 275 | 72  | 38505.2    | 3.709 | 7.5 | 0.7 | 7.3  | 1.1 | 0.4 | 0.84 | 0.75147 | 2180.4 | 15.5 | 2154.5 | 10.0 | 2130.0 | 13 | -2.4 |
| Spot 276 | 101 | 56386.6    | 2.053 | 7.2 | 0.8 | 7.7  | 1.1 | 0.4 | 0.81 | 0.72752 | 2195.9 | 15.0 | 2199.4 | 10.0 | 2202.6 | 13 | 0.3  |
| Spot 277 | 158 | 263783.9   | 2.041 | 7.4 | 0.6 | 7.2  | 1.0 | 0.4 | 0.82 | 0.80624 | 2129.9 | 14.8 | 2140.2 | 9.0  | 2150.0 | 10 | 0.9  |
| Spot 278 | 179 | 448434.3   | 1.263 | 7.2 | 0.6 | 7.8  | 1.0 | 0.4 | 0.83 | 0.80315 | 2224.8 | 15.6 | 2213.6 | 9.3  | 2203.3 | 11 | -1.0 |
| Spot 279 | 70  | 92999.8    | 1.837 | 5.7 | 0.7 | 12.0 | 1.1 | 0.5 | 0.86 | 0.77559 | 2607.6 | 18.4 | 2608.2 | 10.4 | 2608.7 | 12 | 0.0  |
| Spot 280 | 327 | 244035.1   | 1.781 | 8.5 | 0.6 | 5.6  | 1.0 | 0.3 | 0.79 | 0.81697 | 1899.6 | 13.0 | 1910.4 | 8.3  | 1922.0 | 10 | 1.2  |
| Spot 281 | 144 | 99019.1    | 1.342 | 8.6 | 0.7 | 5.6  | 1.1 | 0.3 | 0.83 | 0.76713 | 1933.8 | 13.9 | 1915.8 | 9.3  | 1896.4 | 12 | -2.0 |
| Spot 282 | 74  | 46130.4    | 1.070 | 8.5 | 0.7 | 5.4  | 1.2 | 0.3 | 0.93 | 0.78738 | 1850.8 | 15.0 | 1877.4 | 10.1 | 1906.8 | 13 | 2.9  |
| Spot 283 | 190 | 313296.3   | 0.983 | 7.6 | 0.7 | 6.9  | 1.1 | 0.4 | 0.80 | 0.75654 | 2088.7 | 14.3 | 2102.4 | 9.4  | 2115.8 | 12 | 1.3  |
| Spot 284 | 281 | 105647.1   | 2.133 | 8.4 | 0.6 | 5.7  | 1.1 | 0.3 | 0.94 | 0.85805 | 1931.9 | 15.7 | 1936.7 | 9.5  | 1941.9 | 10 | 0.5  |

|                              |     |           |       |     |     |      |     |     |      |         |        |      |        |      |        |    |       |
|------------------------------|-----|-----------|-------|-----|-----|------|-----|-----|------|---------|--------|------|--------|------|--------|----|-------|
| Spot 285                     | 72  | 102668.9  | 1.636 | 5.6 | 0.8 | 12.4 | 1.3 | 0.5 | 0.97 | 0.77486 | 2634.7 | 21.0 | 2632.9 | 11.8 | 2631.4 | 13 | -0.1  |
| Spot 286                     | 162 | 181958.9  | 3.212 | 7.4 | 0.7 | 7.3  | 1.0 | 0.4 | 0.73 | 0.70469 | 2133.7 | 13.3 | 2147.8 | 9.3  | 2161.2 | 13 | 1.3   |
| Spot 287                     | 161 | 105049.9  | 1.943 | 5.5 | 0.5 | 13.1 | 0.9 | 0.5 | 0.75 | 0.82172 | 2694.8 | 16.5 | 2685.7 | 8.6  | 2678.8 | 9  | -0.6  |
| Spot 288                     | 120 | 149831.5  | 2.186 | 7.6 | 0.8 | 7.1  | 1.1 | 0.4 | 0.79 | 0.70419 | 2132.8 | 14.3 | 2118.5 | 9.9  | 2104.6 | 14 | -1.3  |
| Spot 289                     | 99  | 250559.4  | 0.710 | 5.4 | 0.6 | 13.2 | 1.1 | 0.5 | 0.90 | 0.83993 | 2696.4 | 19.8 | 2696.8 | 10.1 | 2697.1 | 10 | 0.0   |
| Spot 290                     | 81  | 215083.0  | 1.342 | 8.2 | 0.8 | 6.0  | 1.1 | 0.4 | 0.79 | 0.71620 | 1968.3 | 13.3 | 1972.0 | 9.5  | 1975.9 | 14 | 0.4   |
| Spot 291                     | 309 | 453498.3  | 1.983 | 5.4 | 0.7 | 12.9 | 1.3 | 0.5 | 1.12 | 0.85597 | 2629.8 | 24.2 | 2668.9 | 12.4 | 2698.6 | 11 | 2.5   |
| Spot 292                     | 82  | 52939.1   | 2.672 | 7.6 | 0.6 | 6.8  | 1.3 | 0.4 | 1.10 | 0.86915 | 2061.4 | 19.4 | 2085.5 | 11.2 | 2109.5 | 11 | 2.3   |
| Spot 293                     | 148 | 135711.3  | 2.587 | 8.6 | 0.6 | 5.7  | 1.2 | 0.4 | 0.96 | 0.82967 | 1961.4 | 16.2 | 1931.5 | 10.0 | 1899.7 | 12 | -3.2  |
| Spot 294                     | 141 | 89078.4   | 1.618 | 7.3 | 0.7 | 7.8  | 1.1 | 0.4 | 0.87 | 0.78296 | 2225.1 | 16.4 | 2202.7 | 10.0 | 2182.0 | 12 | -2.0  |
| Spot 295                     | 272 | 335368.4  | 2.260 | 5.8 | 0.5 | 11.5 | 0.9 | 0.5 | 0.79 | 0.84588 | 2541.2 | 16.5 | 2566.5 | 8.7  | 2586.5 | 8  | 1.8   |
| Spot 296                     | 218 | 194629.8  | 2.590 | 5.4 | 0.6 | 13.3 | 1.1 | 0.5 | 0.95 | 0.85115 | 2687.7 | 20.9 | 2698.6 | 10.5 | 2706.8 | 10 | 0.7   |
| Spot 297                     | 469 | 469133.8  | 2.060 | 7.4 | 0.5 | 7.1  | 1.2 | 0.4 | 1.05 | 0.88619 | 2103.7 | 18.9 | 2129.0 | 10.6 | 2153.5 | 10 | 2.3   |
| Spot 298                     | 87  | 79162.1   | 0.838 | 5.3 | 0.7 | 13.2 | 1.2 | 0.5 | 0.94 | 0.81141 | 2665.6 | 20.5 | 2692.7 | 10.9 | 2713.1 | 11 | 1.7   |
| Spot 299                     | 328 | 641937.5  | 2.069 | 8.5 | 0.6 | 5.5  | 1.0 | 0.3 | 0.83 | 0.82120 | 1895.2 | 13.6 | 1900.9 | 8.6  | 1907.1 | 10 | 0.6   |
| Spot 300                     | 237 | 128779.6  | 1.918 | 8.5 | 0.5 | 5.5  | 0.9 | 0.3 | 0.71 | 0.83031 | 1882.6 | 11.6 | 1893.3 | 7.3  | 1905.0 | 9  | 1.2   |
| Spot 301                     | 173 | 102225.5  | 2.092 | 7.6 | 0.6 | 7.1  | 1.1 | 0.4 | 0.89 | 0.83079 | 2124.4 | 16.2 | 2118.5 | 9.6  | 2112.7 | 11 | -0.6  |
| Spot 302                     | 121 | 104727.7  | 2.284 | 5.4 | 0.8 | 13.4 | 1.3 | 0.5 | 0.98 | 0.76927 | 2722.8 | 21.9 | 2707.2 | 12.1 | 2695.5 | 14 | -1.0  |
| Spot 303                     | 228 | 2186936.4 | 1.167 | 7.8 | 0.6 | 6.5  | 1.2 | 0.4 | 1.05 | 0.87002 | 2033.4 | 18.4 | 2047.7 | 10.7 | 2062.0 | 11 | 1.4   |
| Spot 304                     | 93  | 42072.4   | 1.854 | 7.3 | 0.7 | 7.7  | 1.1 | 0.4 | 0.89 | 0.78914 | 2219.2 | 16.7 | 2202.1 | 10.2 | 2186.2 | 12 | -1.5  |
| Spot 305                     | 127 | 69387.9   | 0.740 | 5.7 | 0.5 | 11.7 | 0.9 | 0.5 | 0.68 | 0.79983 | 2559.4 | 14.4 | 2581.9 | 8.0  | 2599.6 | 9  | 1.5   |
| Spot 306                     | 18  | 20336.9   | 0.999 | 6.1 | 0.9 | 10.6 | 1.3 | 0.5 | 1.02 | 0.75461 | 2500.3 | 21.1 | 2491.5 | 12.5 | 2484.2 | 15 | -0.6  |
| Spot 307                     | 232 | 139192.3  | 1.570 | 7.2 | 0.6 | 7.7  | 1.2 | 0.4 | 1.03 | 0.85835 | 2188.7 | 19.1 | 2196.1 | 10.8 | 2203.1 | 11 | 0.7   |
| Spot 308                     | 174 | 516943.2  | 0.750 | 5.4 | 0.7 | 13.3 | 1.3 | 0.5 | 1.06 | 0.84011 | 2707.8 | 23.4 | 2700.0 | 11.9 | 2694.2 | 11 | -0.5  |
| Spot 309                     | 175 | 237737.4  | 2.217 | 5.4 | 0.7 | 12.9 | 1.1 | 0.5 | 0.80 | 0.75570 | 2651.6 | 17.3 | 2675.9 | 9.9  | 2694.4 | 11 | 1.6   |
| Spot 310                     | 182 | 273115.2  | 0.499 | 6.1 | 0.5 | 10.6 | 0.9 | 0.5 | 0.75 | 0.82420 | 2494.0 | 15.5 | 2488.2 | 8.4  | 2483.5 | 9  | -0.4  |
| Spot 311                     | 159 | 1020363.6 | 1.717 | 8.6 | 0.6 | 5.5  | 1.0 | 0.3 | 0.72 | 0.75126 | 1895.9 | 11.8 | 1895.2 | 8.2  | 1894.3 | 11 | -0.1  |
| Spot 312                     | 80  | 283402.7  | 1.485 | 7.4 | 0.6 | 7.2  | 1.0 | 0.4 | 0.81 | 0.78739 | 2119.3 | 14.6 | 2137.1 | 9.1  | 2154.2 | 11 | 1.6   |
| Spot 313                     | 173 | 154734.5  | 1.691 | 7.6 | 0.5 | 7.1  | 1.0 | 0.4 | 0.83 | 0.86456 | 2131.4 | 15.1 | 2123.2 | 8.6  | 2115.3 | 8  | -0.8  |
| Spot 314                     | 93  | 24122.2   | 1.072 | 7.3 | 0.9 | 7.4  | 1.3 | 0.4 | 0.93 | 0.70917 | 2156.8 | 17.1 | 2164.6 | 11.8 | 2172.0 | 16 | 0.7   |
| Spot 315                     | 121 | 110893.7  | 1.158 | 6.0 | 0.6 | 11.2 | 1.2 | 0.5 | 1.04 | 0.86524 | 2555.5 | 21.9 | 2543.8 | 11.2 | 2534.6 | 10 | -0.8  |
| Run 1 (discordant Nov. 2021) |     |           |       |     |     |      |     |     |      |         |        |      |        |      |        |    |       |
| Spot 262                     | 46  | 31107.5   | 2.707 | 7.7 | 0.9 | 7.9  | 1.4 | 0.4 | 1.07 | 0.76606 | 2339.5 | 21.1 | 2215.0 | 12.6 | 2101.8 | 16 | -11.3 |
| Spot 264                     | 91  | 1625.7    | 1.804 | 3.2 | 1.7 | 32.5 | 1.9 | 0.8 | 0.86 | 0.44472 | 3644.3 | 24.1 | 3564.1 | 19.1 | 3519.3 | 27 | -3.6  |
| Run 2 (Nov.)                 |     |           |       |     |     |      |     |     |      |         |        |      |        |      |        |    |       |
| Spot 9                       | 165 | 106097.0  | 2.417 | 7.5 | 0.8 | 7.4  | 1.4 | 0.4 | 1.19 | 0.84504 | 2185.4 | 22.1 | 2156.5 | 12.6 | 2129.1 | 13 | -2.6  |
| Spot 31                      | 169 | 101376.9  | 1.570 | 7.2 | 0.7 | 7.9  | 1.1 | 0.4 | 0.93 | 0.81465 | 2257.4 | 17.7 | 2224.5 | 10.3 | 2194.3 | 11 | -2.9  |
| Spot 46                      | 86  | 39802.8   | 2.058 | 7.6 | 0.6 | 6.8  | 1.1 | 0.4 | 0.88 | 0.81348 | 2072.1 | 15.6 | 2084.8 | 9.6  | 2097.4 | 11 | 1.2   |
| Spot 49                      | 78  | 31087.3   | 2.066 | 7.3 | 0.8 | 7.3  | 1.3 | 0.4 | 0.99 | 0.76424 | 2124.4 | 17.8 | 2145.9 | 11.5 | 2166.4 | 15 | 1.9   |
| Spot 50                      | 87  | 35726.1   | 1.621 | 8.3 | 0.8 | 5.8  | 1.4 | 0.4 | 1.18 | 0.81703 | 1943.8 | 19.7 | 1940.7 | 12.4 | 1937.4 | 15 | -0.3  |
| Spot 51                      | 82  | 30305.5   | 1.604 | 7.2 | 0.6 | 7.3  | 1.1 | 0.4 | 0.89 | 0.83542 | 2127.5 | 16.1 | 2153.4 | 9.5  | 2178.2 | 10 | 2.3   |
| Spot 53                      | 268 | 94985.5   | 1.583 | 7.3 | 0.7 | 7.3  | 1.3 | 0.4 | 1.13 | 0.85120 | 2116.8 | 20.4 | 2144.8 | 11.9 | 2171.6 | 12 | 2.5   |
| Spot 66                      | 211 | 98874.4   | 1.773 | 7.6 | 0.8 | 6.9  | 1.6 | 0.4 | 1.39 | 0.87842 | 2110.2 | 25.1 | 2100.9 | 14.1 | 2091.8 | 13 | -0.9  |

|          |     |           |       |     |     |      |     |     |      |         |        |      |        |      |        |    |      |
|----------|-----|-----------|-------|-----|-----|------|-----|-----|------|---------|--------|------|--------|------|--------|----|------|
| Spot 68  | 192 | 233898.2  | 2.411 | 5.3 | 0.8 | 13.1 | 1.2 | 0.5 | 0.93 | 0.77788 | 2672.1 | 20.4 | 2688.7 | 11.3 | 2701.3 | 12 | 1.1  |
| Spot 72  | 160 | 287960.7  | 1.663 | 7.5 | 0.5 | 7.5  | 0.8 | 0.4 | 0.65 | 0.80171 | 2214.1 | 12.3 | 2170.1 | 7.3  | 2128.7 | 9  | -4.0 |
| Spot 75  | 28  | 19523.9   | 2.798 | 6.8 | 1.0 | 8.4  | 1.4 | 0.4 | 0.99 | 0.70347 | 2256.0 | 18.8 | 2270.7 | 12.8 | 2284.0 | 17 | 1.2  |
| Spot 79  | 40  | 52255.1   | 1.531 | 7.1 | 0.6 | 7.8  | 1.3 | 0.4 | 1.16 | 0.87277 | 2219.9 | 21.8 | 2212.4 | 12.0 | 2205.4 | 11 | -0.7 |
| Spot 84  | 184 | 96590.6   | 2.631 | 5.4 | 0.6 | 13.5 | 1.2 | 0.5 | 1.08 | 0.87081 | 2743.7 | 24.1 | 2714.6 | 11.7 | 2693.0 | 10 | -1.9 |
| Spot 86  | 108 | 94207.4   | 3.052 | 7.5 | 0.8 | 7.1  | 1.3 | 0.4 | 1.07 | 0.80464 | 2122.6 | 19.4 | 2126.9 | 11.9 | 2131.1 | 14 | 0.4  |
| Spot 87  | 258 | 140554.4  | 1.565 | 8.5 | 0.4 | 5.6  | 0.6 | 0.3 | 0.49 | 0.81240 | 1922.8 | 8.2  | 1909.5 | 5.2  | 1895.1 | 6  | -1.5 |
| Spot 92  | 148 | 150070.0  | 1.055 | 5.0 | 0.6 | 14.7 | 1.1 | 0.5 | 0.90 | 0.82722 | 2768.6 | 20.2 | 2799.2 | 10.3 | 2821.2 | 10 | 1.9  |
| Spot 93  | 276 | 992667.6  | 2.183 | 5.3 | 0.6 | 13.5 | 1.1 | 0.5 | 0.94 | 0.84939 | 2714.2 | 20.9 | 2711.9 | 10.5 | 2710.2 | 10 | -0.1 |
| Spot 111 | 310 | 1792606.3 | 2.205 | 7.6 | 0.6 | 7.2  | 1.0 | 0.4 | 0.81 | 0.79029 | 2155.5 | 14.8 | 2133.8 | 9.1  | 2113.0 | 11 | -2.0 |
| Spot 112 | 141 | 68574.6   | 3.495 | 7.3 | 0.7 | 7.4  | 1.3 | 0.4 | 1.11 | 0.83776 | 2163.2 | 20.3 | 2162.0 | 11.8 | 2160.9 | 13 | -0.1 |
| Spot 113 | 161 | 555166.9  | 1.482 | 7.6 | 0.6 | 7.0  | 1.2 | 0.4 | 0.99 | 0.84945 | 2125.1 | 18.0 | 2114.9 | 10.4 | 2105.0 | 11 | -1.0 |
| Spot 114 | 158 | 130028.9  | 3.810 | 7.4 | 0.7 | 7.0  | 1.2 | 0.4 | 1.01 | 0.82448 | 2074.7 | 17.9 | 2106.5 | 10.9 | 2137.7 | 12 | 2.9  |
| Spot 115 | 46  | 88177.6   | 0.837 | 5.1 | 0.9 | 14.2 | 1.6 | 0.5 | 1.30 | 0.81790 | 2732.6 | 28.9 | 2761.2 | 15.1 | 2782.3 | 15 | 1.8  |
| Spot 117 | 215 | 224977.5  | 1.534 | 7.7 | 0.6 | 6.8  | 1.1 | 0.4 | 0.94 | 0.84385 | 2081.0 | 16.7 | 2082.6 | 9.9  | 2084.2 | 11 | 0.2  |
| Spot 129 | 100 | 6589706.3 | 3.573 | 7.4 | 0.8 | 7.3  | 1.7 | 0.4 | 1.45 | 0.87110 | 2147.5 | 26.5 | 2145.3 | 14.9 | 2143.2 | 14 | -0.2 |
| Spot 130 | 80  | 28706.1   | 1.117 | 7.4 | 1.0 | 7.3  | 1.4 | 0.4 | 1.04 | 0.72973 | 2178.2 | 19.1 | 2154.1 | 12.7 | 2131.2 | 17 | -2.2 |
| Spot 131 | 144 | 91346.3   | 1.916 | 7.6 | 0.6 | 7.0  | 1.1 | 0.4 | 0.96 | 0.84733 | 2107.0 | 17.2 | 2105.3 | 10.0 | 2103.7 | 11 | -0.2 |
| Spot 133 | 207 | 203494.7  | 1.514 | 7.3 | 0.4 | 7.8  | 0.9 | 0.4 | 0.80 | 0.87440 | 2239.8 | 15.2 | 2203.7 | 8.3  | 2170.3 | 8  | -3.2 |
| Spot 134 | 162 | 3700101.0 | 2.395 | 7.5 | 0.6 | 7.1  | 1.1 | 0.4 | 0.92 | 0.82172 | 2138.7 | 16.8 | 2128.7 | 10.0 | 2119.0 | 11 | -0.9 |
| Spot 135 | 128 | 99446.5   | 0.897 | 5.3 | 0.7 | 13.0 | 1.2 | 0.5 | 0.92 | 0.79972 | 2629.8 | 19.9 | 2676.2 | 10.9 | 2711.4 | 11 | 3.0  |
| Spot 137 | 102 | 39649.4   | 1.778 | 8.4 | 0.9 | 5.7  | 1.3 | 0.4 | 0.96 | 0.71064 | 1935.4 | 16.0 | 1926.5 | 11.6 | 1916.9 | 17 | -1.0 |
| Spot 138 | 93  | 22382.6   | 2.034 | 8.2 | 1.2 | 6.1  | 1.4 | 0.4 | 0.87 | 0.60185 | 2019.6 | 15.1 | 1983.9 | 12.6 | 1946.9 | 21 | -3.7 |
| Spot 139 | 60  | 77561.0   | 0.790 | 5.1 | 0.8 | 14.6 | 1.4 | 0.5 | 1.10 | 0.79780 | 2785.8 | 24.8 | 2787.2 | 13.1 | 2788.2 | 14 | 0.1  |
| Spot 147 | 265 | 443110.5  | 2.203 | 5.5 | 0.5 | 13.0 | 0.9 | 0.5 | 0.70 | 0.79592 | 2695.3 | 15.5 | 2676.3 | 8.3  | 2661.9 | 9  | -1.3 |
| Spot 148 | 281 | 160010.6  | 1.729 | 4.7 | 0.4 | 16.6 | 0.8 | 0.6 | 0.71 | 0.88088 | 2914.0 | 16.6 | 2911.3 | 7.7  | 2909.4 | 6  | -0.2 |
| Spot 152 | 68  | 109985.5  | 3.581 | 7.5 | 0.9 | 6.9  | 1.4 | 0.4 | 1.08 | 0.76941 | 2094.6 | 19.4 | 2103.6 | 12.5 | 2112.3 | 16 | 0.8  |
| Spot 153 | 121 | 118848.5  | 2.227 | 5.4 | 0.7 | 13.1 | 1.3 | 0.5 | 1.11 | 0.83843 | 2713.5 | 24.7 | 2688.7 | 12.5 | 2670.0 | 12 | -1.6 |
| Spot 156 | 88  | 150594.5  | 1.463 | 5.3 | 0.8 | 13.4 | 1.3 | 0.5 | 1.06 | 0.81218 | 2700.0 | 23.5 | 2707.0 | 12.4 | 2712.2 | 13 | 0.5  |
| Spot 160 | 231 | 210612.2  | 1.561 | 7.6 | 0.5 | 6.9  | 1.0 | 0.4 | 0.83 | 0.84134 | 2101.5 | 14.9 | 2103.0 | 8.7  | 2104.5 | 9  | 0.1  |
| Spot 161 | 327 | 347289.2  | 1.130 | 7.5 | 0.5 | 7.1  | 1.0 | 0.4 | 0.82 | 0.83656 | 2112.4 | 14.8 | 2122.3 | 8.7  | 2132.0 | 9  | 0.9  |
| Spot 162 | 255 | 828170.2  | 2.120 | 8.5 | 0.7 | 5.6  | 1.0 | 0.4 | 0.75 | 0.74419 | 1937.5 | 12.5 | 1917.1 | 8.7  | 1895.1 | 12 | -2.2 |
| Spot 166 | 93  | 152212.6  | 2.033 | 7.6 | 0.6 | 7.2  | 1.0 | 0.4 | 0.82 | 0.78550 | 2174.3 | 15.1 | 2140.6 | 9.3  | 2108.4 | 11 | -3.1 |
| Spot 167 | 185 | 216746.4  | 1.116 | 4.9 | 0.6 | 15.7 | 1.1 | 0.6 | 0.86 | 0.80467 | 2867.7 | 19.9 | 2859.9 | 10.2 | 2854.4 | 10 | -0.5 |
| Spot 168 | 180 | 331954.2  | 2.026 | 7.4 | 0.6 | 7.5  | 0.9 | 0.4 | 0.69 | 0.77796 | 2207.3 | 12.9 | 2178.6 | 8.0  | 2151.7 | 10 | -2.6 |
| Spot 170 | 170 | 54971.1   | 2.202 | 5.4 | 0.8 | 13.4 | 1.4 | 0.5 | 1.20 | 0.83170 | 2746.8 | 26.7 | 2705.1 | 13.6 | 2674.1 | 13 | -2.7 |
| Spot 174 | 156 | 92094.3   | 2.119 | 5.3 | 0.5 | 13.0 | 1.2 | 0.5 | 1.05 | 0.89360 | 2666.1 | 22.9 | 2682.2 | 11.1 | 2694.4 | 9  | 1.0  |
| Spot 175 | 179 | 260871.9  | 1.526 | 5.4 | 0.7 | 13.1 | 1.4 | 0.5 | 1.21 | 0.88087 | 2694.5 | 26.7 | 2688.8 | 13.0 | 2684.6 | 11 | -0.4 |
| Spot 179 | 186 | 120814.2  | 2.108 | 5.4 | 0.5 | 13.6 | 1.0 | 0.5 | 0.82 | 0.84750 | 2772.4 | 18.6 | 2720.6 | 9.2  | 2682.3 | 9  | -3.4 |
| Spot 181 | 138 | 55305.5   | 2.249 | 7.4 | 0.8 | 7.4  | 1.4 | 0.4 | 1.07 | 0.79467 | 2175.5 | 19.8 | 2155.1 | 12.1 | 2135.8 | 14 | -1.9 |
| Spot 182 | 226 | 366920.0  | 1.403 | 7.7 | 0.7 | 6.8  | 1.1 | 0.4 | 0.85 | 0.77173 | 2089.8 | 15.2 | 2088.0 | 9.8  | 2086.3 | 12 | -0.2 |
| Spot 186 | 60  | 33237.4   | 1.447 | 7.1 | 1.0 | 7.7  | 1.6 | 0.4 | 1.23 | 0.78479 | 2176.7 | 22.8 | 2194.2 | 14.1 | 2210.5 | 17 | 1.5  |
| Spot 188 | 106 | 93047.6   | 1.993 | 4.5 | 0.6 | 18.0 | 1.0 | 0.6 | 0.84 | 0.80498 | 3027.6 | 20.4 | 2990.0 | 10.1 | 2964.8 | 10 | -2.1 |



|          |     |          |       |     |     |      |     |     |      |         |        |      |        |      |        |    |      |
|----------|-----|----------|-------|-----|-----|------|-----|-----|------|---------|--------|------|--------|------|--------|----|------|
| Spot 189 | 53  | 115225.7 | 2.163 | 7.8 | 0.9 | 6.4  | 1.6 | 0.4 | 1.32 | 0.83195 | 2017.4 | 22.8 | 2037.5 | 13.9 | 2057.8 | 16 | 2.0  |
| Spot 190 | 24  | 39050.5  | 1.704 | 4.0 | 0.9 | 20.8 | 1.4 | 0.6 | 1.03 | 0.76056 | 3093.4 | 25.4 | 3130.1 | 13.2 | 3153.7 | 14 | 1.9  |
| Spot 191 | 52  | 32047.0  | 4.185 | 7.5 | 1.0 | 7.3  | 1.5 | 0.4 | 1.18 | 0.76311 | 2197.6 | 21.9 | 2150.9 | 13.8 | 2106.6 | 18 | -4.3 |
| Spot 193 | 400 | 225695.4 | 1.588 | 7.5 | 0.5 | 6.7  | 1.0 | 0.4 | 0.89 | 0.87283 | 2042.3 | 15.5 | 2078.0 | 9.0  | 2113.5 | 9  | 3.4  |
| Spot 196 | 260 | 268332.9 | 1.820 | 7.4 | 0.8 | 7.2  | 1.3 | 0.4 | 1.06 | 0.79961 | 2110.0 | 19.0 | 2130.8 | 11.8 | 2150.8 | 14 | 1.9  |
| Spot 197 | 216 | 221403.0 | 2.152 | 5.5 | 0.5 | 12.3 | 0.9 | 0.5 | 0.75 | 0.80783 | 2596.7 | 15.9 | 2631.3 | 8.7  | 2658.0 | 9  | 2.3  |
| Spot 198 | 98  | 109930.1 | 1.734 | 7.3 | 1.0 | 7.6  | 1.5 | 0.4 | 1.16 | 0.76197 | 2197.6 | 21.5 | 2179.9 | 13.6 | 2163.3 | 17 | -1.6 |
| Spot 200 | 164 | 269845.3 | 1.961 | 5.4 | 0.7 | 13.2 | 1.3 | 0.5 | 1.10 | 0.85573 | 2700.1 | 24.4 | 2693.2 | 12.2 | 2688.0 | 11 | -0.5 |
| Spot 201 | 203 | 229731.5 | 1.359 | 4.9 | 0.5 | 14.9 | 0.9 | 0.5 | 0.71 | 0.83610 | 2786.3 | 16.1 | 2808.3 | 8.1  | 2824.1 | 8  | 1.3  |
| Spot 203 | 44  | 14871.5  | 2.750 | 7.6 | 1.0 | 6.9  | 1.5 | 0.4 | 1.01 | 0.68190 | 2123.9 | 18.3 | 2104.0 | 13.2 | 2084.6 | 19 | -1.9 |
| Spot 205 | 49  | 45828.7  | 1.078 | 7.6 | 0.9 | 6.6  | 1.6 | 0.4 | 1.29 | 0.80661 | 2040.9 | 22.6 | 2063.9 | 14.1 | 2086.9 | 17 | 2.2  |
| Spot 217 | 117 | 87159.5  | 0.753 | 6.1 | 0.7 | 10.6 | 1.3 | 0.5 | 1.09 | 0.85491 | 2506.7 | 22.7 | 2488.6 | 11.9 | 2473.8 | 11 | -1.3 |
| Spot 219 | 130 | 258792.7 | 0.967 | 7.3 | 0.5 | 7.5  | 0.9 | 0.4 | 0.74 | 0.82641 | 2171.0 | 13.5 | 2174.1 | 8.0  | 2177.1 | 9  | 0.3  |
| Spot 224 | 152 | 678548.1 | 1.416 | 7.4 | 0.6 | 7.3  | 1.0 | 0.4 | 0.89 | 0.85025 | 2161.7 | 16.3 | 2152.6 | 9.3  | 2144.0 | 10 | -0.8 |
| Spot 226 | 225 | 153427.2 | 1.388 | 8.5 | 0.5 | 5.6  | 1.1 | 0.4 | 0.94 | 0.89108 | 1936.6 | 15.7 | 1917.7 | 9.1  | 1897.2 | 9  | -2.1 |
| Spot 227 | 40  | 21903.8  | 2.344 | 7.4 | 0.9 | 7.6  | 1.3 | 0.4 | 0.88 | 0.69841 | 2221.5 | 16.6 | 2182.2 | 11.3 | 2145.4 | 16 | -3.5 |
| Spot 232 | 223 | 201532.8 | 1.218 | 5.6 | 0.5 | 12.2 | 1.0 | 0.5 | 0.84 | 0.83781 | 2609.0 | 18.0 | 2617.7 | 9.4  | 2624.5 | 9  | 0.6  |
| Spot 233 | 105 | 49602.3  | 3.599 | 7.5 | 0.8 | 7.2  | 1.5 | 0.4 | 1.27 | 0.85609 | 2163.4 | 23.4 | 2140.3 | 13.3 | 2118.2 | 13 | -2.1 |
| Spot 234 | 84  | 33273.2  | 2.902 | 6.9 | 0.6 | 8.3  | 1.0 | 0.4 | 0.86 | 0.82562 | 2261.2 | 16.3 | 2259.4 | 9.4  | 2257.8 | 10 | -0.2 |
| Spot 235 | 66  | 35721.1  | 1.611 | 7.3 | 0.8 | 7.1  | 1.4 | 0.4 | 1.20 | 0.84469 | 2072.2 | 21.3 | 2125.0 | 12.7 | 2176.5 | 13 | 4.8  |
| Spot 236 | 109 | 45689.9  | 3.518 | 7.5 | 0.6 | 7.1  | 1.1 | 0.4 | 0.89 | 0.84536 | 2122.8 | 16.1 | 2125.7 | 9.4  | 2128.4 | 10 | 0.3  |
| Spot 238 | 228 | 102270.6 | 2.162 | 7.4 | 0.7 | 7.4  | 1.4 | 0.4 | 1.24 | 0.88096 | 2166.2 | 22.9 | 2154.9 | 12.6 | 2144.2 | 12 | -1.0 |
| Spot 239 | 55  | 233685.0 | 0.926 | 5.2 | 0.8 | 13.9 | 1.5 | 0.5 | 1.30 | 0.84632 | 2733.4 | 29.0 | 2743.0 | 14.6 | 2750.1 | 13 | 0.6  |
| Spot 241 | 246 | 136823.8 | 2.008 | 5.3 | 0.6 | 13.0 | 1.0 | 0.5 | 0.75 | 0.77326 | 2657.6 | 16.4 | 2681.7 | 9.2  | 2699.9 | 10 | 1.6  |
| Spot 242 | 235 | 694138.2 | 2.092 | 5.3 | 0.7 | 13.1 | 1.1 | 0.5 | 0.87 | 0.80031 | 2653.5 | 18.9 | 2688.9 | 10.2 | 2715.6 | 11 | 2.3  |
| Spot 251 | 92  | 71635.0  | 2.134 | 7.4 | 0.9 | 7.4  | 1.3 | 0.4 | 0.87 | 0.69142 | 2170.2 | 16.1 | 2159.2 | 11.3 | 2148.7 | 16 | -1.0 |
| Spot 253 | 134 | 285495.7 | 0.888 | 7.4 | 0.6 | 7.3  | 1.2 | 0.4 | 1.03 | 0.85290 | 2159.2 | 18.8 | 2147.2 | 10.8 | 2135.8 | 11 | -1.1 |
| Spot 254 | 91  | 107893.5 | 1.028 | 7.9 | 0.9 | 6.6  | 1.3 | 0.4 | 0.90 | 0.71626 | 2086.2 | 16.1 | 2057.8 | 11.1 | 2029.5 | 16 | -2.8 |
| Spot 256 | 398 | 564209.1 | 0.773 | 7.5 | 0.9 | 6.9  | 1.5 | 0.4 | 1.20 | 0.79556 | 2073.3 | 21.3 | 2097.9 | 13.4 | 2122.0 | 16 | 2.3  |
| Spot 257 | 215 | 127291.6 | 0.983 | 7.5 | 0.7 | 7.2  | 1.1 | 0.4 | 0.87 | 0.77306 | 2158.0 | 15.9 | 2140.8 | 10.0 | 2124.3 | 12 | -1.6 |
| Spot 258 | 91  | 91841.2  | 0.950 | 5.3 | 0.6 | 14.1 | 1.0 | 0.5 | 0.79 | 0.81291 | 2813.9 | 18.1 | 2756.1 | 9.3  | 2714.1 | 9  | -3.7 |
| Spot 260 | 30  | 14471.1  | 0.675 | 7.6 | 1.1 | 6.6  | 1.5 | 0.4 | 0.95 | 0.62864 | 2050.3 | 16.7 | 2064.4 | 13.3 | 2078.6 | 21 | 1.4  |
| Spot 261 | 80  | 93938.5  | 1.814 | 7.2 | 0.9 | 7.7  | 1.5 | 0.4 | 1.20 | 0.80896 | 2198.3 | 22.4 | 2194.5 | 13.3 | 2190.9 | 15 | -0.3 |
| Spot 262 | 153 | 84477.5  | 0.804 | 7.9 | 0.6 | 6.5  | 1.6 | 0.4 | 1.44 | 0.91574 | 2040.1 | 25.2 | 2040.2 | 13.9 | 2040.4 | 11 | 0.0  |
| Spot 263 | 215 | 95319.9  | 2.283 | 5.2 | 0.9 | 13.4 | 1.6 | 0.5 | 1.32 | 0.83090 | 2685.3 | 29.0 | 2709.4 | 15.0 | 2727.4 | 15 | 1.5  |
| Spot 264 | 221 | 114232.6 | 2.136 | 5.0 | 0.7 | 14.5 | 1.1 | 0.5 | 0.93 | 0.81950 | 2757.3 | 20.9 | 2780.6 | 10.8 | 2797.5 | 11 | 1.4  |
| Spot 265 | 146 | 89398.8  | 1.954 | 5.5 | 0.6 | 13.0 | 0.9 | 0.5 | 0.64 | 0.74738 | 2703.5 | 14.2 | 2677.9 | 8.1  | 2658.6 | 9  | -1.7 |
| Spot 267 | 174 | 151789.4 | 2.052 | 5.4 | 0.4 | 13.1 | 0.8 | 0.5 | 0.68 | 0.85052 | 2683.0 | 14.9 | 2684.8 | 7.5  | 2686.2 | 7  | 0.1  |
| Spot 268 | 138 | 122016.3 | 2.015 | 5.4 | 0.4 | 13.6 | 0.8 | 0.5 | 0.71 | 0.85372 | 2754.1 | 16.0 | 2720.0 | 7.9  | 2694.8 | 7  | -2.2 |
| Spot 269 | 129 | 260562.4 | 2.331 | 5.1 | 0.6 | 14.7 | 1.2 | 0.6 | 1.06 | 0.87279 | 2835.4 | 24.4 | 2798.5 | 11.6 | 2771.9 | 10 | -2.3 |
| Spot 270 | 219 | 254832.5 | 2.026 | 5.4 | 0.5 | 13.3 | 0.8 | 0.5 | 0.66 | 0.81578 | 2717.3 | 14.6 | 2703.7 | 7.6  | 2693.5 | 8  | -0.9 |
| Spot 271 | 193 | 140787.6 | 2.434 | 5.4 | 0.6 | 12.4 | 1.3 | 0.5 | 1.16 | 0.87486 | 2574.9 | 24.7 | 2635.9 | 12.5 | 2683.1 | 11 | 4.0  |
| Spot 278 | 101 | 93833.2  | 2.999 | 7.5 | 0.8 | 7.0  | 1.5 | 0.4 | 1.32 | 0.85420 | 2102.4 | 23.6 | 2116.5 | 13.7 | 2130.3 | 14 | 1.3  |

|                                       |     |           |       |     |     |      |     |     |      |         |        |      |        |      |        |    |        |
|---------------------------------------|-----|-----------|-------|-----|-----|------|-----|-----|------|---------|--------|------|--------|------|--------|----|--------|
| Spot 280                              | 168 | 80516.9   | 3.336 | 7.5 | 0.8 | 7.0  | 1.3 | 0.4 | 1.10 | 0.82597 | 2094.2 | 19.7 | 2107.4 | 11.8 | 2120.4 | 13 | 1.2    |
| Spot 283                              | 232 | 138929.3  | 1.404 | 3.8 | 0.7 | 22.5 | 1.2 | 0.6 | 0.98 | 0.83013 | 3142.1 | 24.3 | 3203.7 | 11.4 | 3242.5 | 10 | 3.1    |
| Spot 284                              | 190 | 90428.2   | 2.120 | 5.4 | 0.7 | 13.4 | 1.3 | 0.5 | 1.07 | 0.84563 | 2727.4 | 23.8 | 2706.4 | 12.0 | 2690.8 | 11 | -1.4   |
| Spot 286                              | 156 | 70265.7   | 2.862 | 7.6 | 1.1 | 7.2  | 1.7 | 0.4 | 1.33 | 0.77410 | 2188.4 | 24.6 | 2137.6 | 15.3 | 2089.1 | 19 | -4.8   |
| Spot 288                              | 69  | 441759.9  | 1.620 | 7.6 | 0.6 | 7.1  | 1.0 | 0.4 | 0.82 | 0.82178 | 2139.6 | 14.8 | 2123.0 | 8.8  | 2107.1 | 10 | -1.5   |
| Spot 289                              | 255 | 909599.6  | 1.064 | 3.5 | 0.3 | 26.4 | 0.7 | 0.7 | 0.62 | 0.87311 | 3339.2 | 16.3 | 3361.1 | 7.0  | 3374.2 | 5  | 1.0    |
| Spot 290                              | 328 | 223371.0  | 1.849 | 8.5 | 0.5 | 5.6  | 1.0 | 0.3 | 0.88 | 0.86136 | 1929.2 | 14.8 | 1912.5 | 8.8  | 1894.5 | 9  | -1.8   |
| Spot 291                              | 402 | 304900.0  | 1.555 | 7.4 | 0.6 | 7.2  | 0.9 | 0.4 | 0.74 | 0.78232 | 2127.0 | 13.4 | 2137.3 | 8.4  | 2147.1 | 10 | 0.9    |
| Spot 292                              | 208 | 7088290.4 | 2.233 | 5.9 | 0.7 | 10.8 | 1.4 | 0.5 | 1.15 | 0.84722 | 2473.5 | 23.6 | 2506.3 | 12.6 | 2532.9 | 12 | 2.3    |
| Spot 293                              | 129 | 57942.1   | 1.881 | 8.2 | 0.7 | 5.8  | 1.3 | 0.4 | 1.10 | 0.83035 | 1937.2 | 18.3 | 1950.1 | 11.4 | 1963.7 | 13 | 1.3    |
| Spot 297                              | 235 | 98585.4   | 0.954 | 7.8 | 0.4 | 6.5  | 0.8 | 0.4 | 0.76 | 0.90324 | 2042.7 | 13.3 | 2043.7 | 7.4  | 2044.6 | 6  | 0.1    |
| Spot 298                              | 150 | 72769.2   | 1.538 | 8.4 | 0.7 | 5.7  | 1.1 | 0.4 | 0.91 | 0.79348 | 1950.3 | 15.2 | 1930.9 | 9.9  | 1910.1 | 12 | -2.1   |
| Spot 299                              | 141 | 277878.0  | 2.193 | 5.5 | 0.8 | 12.7 | 1.4 | 0.5 | 1.14 | 0.83402 | 2663.2 | 24.8 | 2656.9 | 12.8 | 2652.1 | 12 | -0.4   |
| Spot 300                              | 131 | 43410.4   | 2.580 | 7.5 | 0.5 | 7.4  | 0.8 | 0.4 | 0.59 | 0.77739 | 2198.6 | 11.0 | 2156.2 | 6.8  | 2116.0 | 8  | -3.9   |
| Spot 302                              | 55  | 31144.7   | 1.659 | 5.3 | 0.7 | 13.1 | 1.1 | 0.5 | 0.85 | 0.77222 | 2679.0 | 18.7 | 2688.8 | 10.4 | 2696.2 | 12 | 0.6    |
| Spot 308                              | 240 | 102689.5  | 1.627 | 8.6 | 0.8 | 5.4  | 1.2 | 0.3 | 0.91 | 0.76014 | 1879.4 | 14.9 | 1880.7 | 10.3 | 1882.2 | 14 | 0.1    |
| Spot 310                              | 65  | 48499.8   | 2.162 | 7.3 | 0.6 | 7.5  | 1.1 | 0.4 | 0.95 | 0.82538 | 2189.5 | 17.6 | 2175.5 | 10.3 | 2162.4 | 11 | -1.3   |
| Spot 311                              | 251 | 138639.3  | 1.968 | 5.8 | 0.6 | 11.1 | 0.9 | 0.5 | 0.72 | 0.76333 | 2506.9 | 14.9 | 2531.9 | 8.8  | 2552.1 | 10 | 1.8    |
| Spot 312                              | 129 | 109425.0  | 2.195 | 5.5 | 0.7 | 12.3 | 1.3 | 0.5 | 1.12 | 0.85691 | 2623.0 | 24.0 | 2629.9 | 12.2 | 2635.2 | 11 | 0.5    |
| Spot 314                              | 246 | 156444.2  | 2.628 | 7.5 | 0.7 | 7.2  | 1.3 | 0.4 | 1.04 | 0.81161 | 2137.8 | 18.9 | 2134.5 | 11.4 | 2131.4 | 13 | -0.3   |
| Spot 315                              | 167 | 143545.7  | 2.441 | 5.4 | 0.7 | 13.2 | 1.5 | 0.5 | 1.31 | 0.87200 | 2695.3 | 28.8 | 2694.5 | 14.1 | 2694.0 | 12 | 0.0    |
| Run 2 Rora Med discordant (Nov. 2021) |     |           |       |     |     |      |     |     |      |         |        |      |        |      |        |    |        |
| Spot 132                              | 105 | 108601.0  | 0.872 | 8.0 | 0.6 | 6.8  | 1.1 | 0.4 | 0.86 | 0.80133 | 2158.3 | 15.7 | 2088.2 | 9.5  | 2019.8 | 11 | -6.9   |
| Spot 136                              | 1   | 3000.0    | 0.432 | 5.1 | 1.0 | 31.5 | 1.2 | 1.2 | 0.60 | 0.51448 | 4989.8 | 20.8 | 3535.1 | 11.5 | 2789.6 | 16 | -78.9  |
| Spot 252                              | 105 | 59896.9   | 1.789 | 8.6 | 0.6 | 5.8  | 1.1 | 0.4 | 0.90 | 0.82815 | 2001.1 | 15.4 | 1947.2 | 9.4  | 1890.5 | 11 | -5.9   |
| Spot 309                              | 147 | 179820.7  | 0.969 | 7.6 | 0.6 | 7.5  | 1.0 | 0.4 | 0.77 | 0.77551 | 2247.9 | 14.5 | 2178.9 | 8.9  | 2114.5 | 11 | -6.3   |
| Run 1 (Sept. 2022)                    |     |           |       |     |     |      |     |     |      |         |        |      |        |      |        |    |        |
| Erin-RM/                              | 66  | 32881.2   | 2.082 | 7.1 | 0.5 | 8.0  | 0.8 | 0.4 | 0.57 | 0.72398 | 2243.9 | 10.9 | 2226.1 | 7.1  | 2209.8 | 9  | -1.546 |
| Erin-RM/                              | 174 | 63966.3   | 2.164 | 5.3 | 0.4 | 13.2 | 0.7 | 0.5 | 0.56 | 0.80122 | 2682.5 | 12.2 | 2691.4 | 6.6  | 2698.0 | 7  | 0.575  |
| Erin-RM/                              | 44  | 23668.3   | 0.719 | 7.5 | 0.7 | 7.1  | 1.0 | 0.4 | 0.66 | 0.67747 | 2136.9 | 12.0 | 2126.7 | 8.7  | 2116.9 | 13 | -0.944 |
| Erin-RM/                              | 170 | 57979.6   | 1.974 | 7.6 | 0.5 | 7.0  | 0.8 | 0.4 | 0.57 | 0.74801 | 2136.1 | 10.3 | 2115.9 | 6.7  | 2096.3 | 9  | -1.897 |
| Erin-RM/                              | 51  | 120006.0  | 1.925 | 7.1 | 0.5 | 7.7  | 0.9 | 0.4 | 0.66 | 0.77193 | 2187.8 | 12.3 | 2199.8 | 7.7  | 2211.0 | 9  | 1.052  |
| Erin-RM/                              | 110 | 154142.2  | 1.055 | 5.6 | 0.5 | 12.4 | 0.8 | 0.5 | 0.61 | 0.75219 | 2643.9 | 13.3 | 2634.4 | 7.7  | 2627.1 | 9  | -0.638 |
| Erin-RM/                              | 8   | 23687.8   | 3.533 | 7.0 | 1.2 | 7.3  | 1.6 | 0.4 | 0.99 | 0.62915 | 2046.4 | 17.3 | 2145.0 | 14.0 | 2240.8 | 21 | 8.674  |
| Erin-RM/                              | 28  | 37281.1   | 0.963 | 7.5 | 0.7 | 6.9  | 0.9 | 0.4 | 0.59 | 0.62210 | 2075.3 | 10.4 | 2092.7 | 8.4  | 2109.9 | 13 | 1.641  |
| Erin-RM/                              | 171 | 45984.0   | 2.018 | 6.0 | 0.4 | 10.7 | 0.8 | 0.5 | 0.61 | 0.80912 | 2474.3 | 12.6 | 2496.4 | 7.1  | 2514.4 | 8  | 1.593  |
| Erin-RM/                              | 98  | 119714.5  | 1.817 | 7.1 | 0.6 | 8.0  | 0.9 | 0.4 | 0.68 | 0.77850 | 2256.3 | 13.0 | 2233.0 | 7.9  | 2211.7 | 10 | -2.014 |
| Erin-RM/                              | 72  | 179747.8  | 2.908 | 6.0 | 0.5 | 10.7 | 0.8 | 0.5 | 0.60 | 0.74864 | 2491.0 | 12.3 | 2494.0 | 7.4  | 2496.5 | 9  | 0.219  |
| Erin-RM/                              | 171 | 42251.5   | 2.295 | 7.3 | 0.5 | 7.6  | 0.8 | 0.4 | 0.58 | 0.73991 | 2199.8 | 10.8 | 2188.1 | 7.0  | 2177.2 | 9  | -1.038 |
| Erin-RM/                              | 73  | 35853.9   | 2.550 | 7.4 | 0.7 | 7.2  | 1.0 | 0.4 | 0.75 | 0.74323 | 2142.8 | 13.7 | 2139.0 | 9.0  | 2135.3 | 12 | -0.353 |
| Erin-RM/                              | 169 | 65450.9   | 2.184 | 5.3 | 0.4 | 13.3 | 0.8 | 0.5 | 0.67 | 0.85199 | 2694.5 | 14.8 | 2697.8 | 7.4  | 2700.2 | 7  | 0.211  |
| Erin-RM/                              | 170 | 56887.0   | 1.948 | 6.9 | 0.5 | 8.3  | 0.8 | 0.4 | 0.63 | 0.80257 | 2244.8 | 11.9 | 2259.2 | 7.1  | 2272.1 | 8  | 1.201  |
| Erin-RM/                              | 252 | 94154.2   | 2.176 | 5.3 | 0.4 | 13.2 | 0.7 | 0.5 | 0.58 | 0.82976 | 2680.5 | 12.8 | 2695.1 | 6.6  | 2706.0 | 6  | 0.942  |

|          |     |           |       |     |     |      |     |     |      |         |        |      |        |      |        |    |        |
|----------|-----|-----------|-------|-----|-----|------|-----|-----|------|---------|--------|------|--------|------|--------|----|--------|
| Erin-RM/ | 62  | 101449.6  | 2.372 | 7.2 | 0.5 | 7.5  | 0.7 | 0.4 | 0.52 | 0.73738 | 2162.5 | 9.6  | 2178.0 | 6.4  | 2192.6 | 8  | 1.374  |
| Erin-RM/ | 209 | 133277.5  | 1.315 | 7.6 | 0.5 | 7.0  | 0.8 | 0.4 | 0.61 | 0.75624 | 2130.2 | 11.0 | 2114.0 | 7.2  | 2098.3 | 9  | -1.522 |
| Erin-RM/ | 80  | 330801.6  | 2.054 | 7.3 | 0.5 | 7.6  | 0.8 | 0.4 | 0.61 | 0.76958 | 2207.8 | 11.4 | 2189.7 | 7.1  | 2172.8 | 9  | -1.615 |
| Erin-RM/ | 177 | 63190.1   | 1.768 | 5.0 | 0.4 | 15.2 | 0.7 | 0.6 | 0.58 | 0.84915 | 2845.5 | 13.3 | 2830.0 | 6.5  | 2819.0 | 6  | -0.94  |
| Erin-RM/ | 253 | 111243.9  | 2.209 | 5.3 | 0.4 | 13.2 | 0.7 | 0.5 | 0.60 | 0.84218 | 2691.1 | 13.1 | 2697.6 | 6.7  | 2702.4 | 6  | 0.419  |
| Erin-RM/ | 124 | 66334.0   | 2.017 | 7.2 | 0.5 | 7.5  | 0.8 | 0.4 | 0.58 | 0.76011 | 2158.6 | 10.6 | 2174.5 | 6.8  | 2189.6 | 9  | 1.415  |
| Erin-RM/ | 85  | 1684836.1 | 1.718 | 7.3 | 0.5 | 7.6  | 0.8 | 0.4 | 0.64 | 0.78664 | 2197.5 | 11.9 | 2182.5 | 7.3  | 2168.4 | 9  | -1.339 |
| Erin-RM/ | 117 | 220135.1  | 1.524 | 7.3 | 0.5 | 7.5  | 0.7 | 0.4 | 0.55 | 0.74466 | 2171.2 | 10.2 | 2168.5 | 6.7  | 2165.8 | 9  | -0.25  |
| Erin-RM/ | 103 | 57280.2   | 1.666 | 7.4 | 0.5 | 7.4  | 0.9 | 0.4 | 0.73 | 0.83984 | 2181.0 | 13.5 | 2158.1 | 7.8  | 2136.4 | 8  | -2.089 |
| Erin-RM/ | 119 | 51775.8   | 5.137 | 7.6 | 0.6 | 7.1  | 1.1 | 0.4 | 0.88 | 0.82163 | 2146.3 | 16.0 | 2121.5 | 9.5  | 2097.5 | 11 | -2.329 |
| Erin-RM/ | 11  | 19386.3   | 1.186 | 7.5 | 1.3 | 7.2  | 1.8 | 0.4 | 1.15 | 0.64978 | 2167.8 | 21.2 | 2137.0 | 15.8 | 2107.6 | 24 | -2.855 |
| Erin-RM/ | 419 | 96211.2   | 1.043 | 7.1 | 0.4 | 7.7  | 0.7 | 0.4 | 0.59 | 0.84027 | 2194.4 | 11.0 | 2201.1 | 6.4  | 2207.4 | 7  | 0.585  |
| Erin-RM/ | 75  | 31961.0   | 2.519 | 6.7 | 1.0 | 8.6  | 1.3 | 0.4 | 0.78 | 0.61142 | 2266.8 | 14.8 | 2296.0 | 11.6 | 2322.0 | 17 | 2.379  |
| Erin-RM/ | 175 | 44776.3   | 2.057 | 8.5 | 0.6 | 5.5  | 0.9 | 0.3 | 0.65 | 0.75100 | 1919.6 | 10.7 | 1906.4 | 7.4  | 1892.1 | 10 | -1.452 |
| Erin-RM/ | 160 | 288690.1  | 3.738 | 5.3 | 0.5 | 12.5 | 0.7 | 0.5 | 0.57 | 0.76032 | 2546.8 | 12.0 | 2645.9 | 7.0  | 2722.7 | 8  | 6.459  |
| Erin-RM/ | 35  | 57389.1   | 1.394 | 7.1 | 0.9 | 7.7  | 1.1 | 0.4 | 0.63 | 0.58179 | 2187.9 | 11.7 | 2201.2 | 9.7  | 2213.6 | 15 | 1.16   |
| Erin-RM/ | 278 | 394493.4  | 1.414 | 7.6 | 0.4 | 7.0  | 0.7 | 0.4 | 0.56 | 0.79749 | 2112.5 | 10.0 | 2105.8 | 6.2  | 2099.2 | 7  | -0.631 |
| Erin-RM/ | 212 | 147307.3  | 2.867 | 8.5 | 0.5 | 5.5  | 0.9 | 0.3 | 0.71 | 0.82182 | 1904.2 | 11.6 | 1901.2 | 7.4  | 1897.9 | 9  | -0.334 |
| Erin-RM/ | 129 | 58003.8   | 2.368 | 7.4 | 0.4 | 7.1  | 0.8 | 0.4 | 0.65 | 0.82292 | 2100.0 | 11.6 | 2123.4 | 7.0  | 2146.1 | 8  | 2.146  |
| Erin-RM/ | 101 | 24759.2   | 1.919 | 7.4 | 0.5 | 7.3  | 0.9 | 0.4 | 0.72 | 0.82205 | 2142.1 | 13.2 | 2143.9 | 7.8  | 2145.6 | 9  | 0.16   |
| Erin-RM/ | 121 | 27692.1   | 2.437 | 6.9 | 0.5 | 8.5  | 0.8 | 0.4 | 0.62 | 0.76765 | 2310.4 | 12.0 | 2287.4 | 7.3  | 2266.9 | 9  | -1.918 |
| Erin-RM/ | 83  | 51692.7   | 1.683 | 8.1 | 0.6 | 6.1  | 0.8 | 0.4 | 0.45 | 0.60472 | 1988.8 | 7.8  | 1986.7 | 6.5  | 1984.5 | 11 | -0.217 |
| Erin-RM/ | 170 | 103048.8  | 3.949 | 6.0 | 0.5 | 10.1 | 0.8 | 0.4 | 0.53 | 0.69985 | 2372.5 | 10.6 | 2448.0 | 7.1  | 2511.3 | 9  | 5.528  |
| Erin-RM/ | 112 | 33846.1   | 1.886 | 7.6 | 0.6 | 6.9  | 0.9 | 0.4 | 0.66 | 0.75910 | 2095.0 | 11.8 | 2098.9 | 7.7  | 2102.7 | 10 | 0.366  |
| Erin-RM/ | 130 | 75330.4   | 2.526 | 6.8 | 0.3 | 8.6  | 0.6 | 0.4 | 0.46 | 0.79943 | 2296.7 | 8.9  | 2292.5 | 5.2  | 2288.8 | 6  | -0.345 |
| Erin-RM/ | 122 | 43094.8   | 0.516 | 4.7 | 0.4 | 16.3 | 0.8 | 0.6 | 0.65 | 0.85494 | 2894.0 | 15.2 | 2893.3 | 7.3  | 2892.8 | 6  | -0.042 |
| Erin-RM/ | 213 | 56887.4   | 4.796 | 7.5 | 0.5 | 7.3  | 0.7 | 0.4 | 0.54 | 0.76093 | 2158.9 | 9.9  | 2143.4 | 6.4  | 2128.5 | 8  | -1.427 |
| Erin-RM/ | 667 | 88432.6   | 9.635 | 7.4 | 0.4 | 7.0  | 1.0 | 0.4 | 0.94 | 0.90491 | 2082.3 | 16.8 | 2111.2 | 9.2  | 2139.6 | 8  | 2.679  |
| Erin-RM/ | 68  | 42637.5   | 3.278 | 7.4 | 0.5 | 7.3  | 0.8 | 0.4 | 0.56 | 0.74406 | 2165.4 | 10.3 | 2149.1 | 6.7  | 2133.5 | 9  | -1.496 |
| Erin-RM/ | 294 | 102296.9  | 1.743 | 5.3 | 0.4 | 13.3 | 0.8 | 0.5 | 0.69 | 0.88897 | 2687.3 | 15.1 | 2702.3 | 7.3  | 2713.5 | 6  | 0.966  |
| Erin-RM/ | 40  | 10836.4   | 2.047 | 7.4 | 0.6 | 7.0  | 0.9 | 0.4 | 0.56 | 0.63533 | 2105.0 | 10.1 | 2115.9 | 7.8  | 2126.6 | 12 | 1.018  |
| Erin-RM/ | 74  | 86621.2   | 1.653 | 7.6 | 0.6 | 7.2  | 0.7 | 0.4 | 0.39 | 0.55864 | 2173.6 | 7.1  | 2133.9 | 6.2  | 2095.9 | 10 | -3.707 |
| Erin-RM/ | 30  | 5824.5    | 2.952 | 7.2 | 0.7 | 7.3  | 1.0 | 0.4 | 0.70 | 0.69517 | 2144.0 | 12.8 | 2153.3 | 9.0  | 2162.2 | 13 | 0.841  |
| Erin-RM/ | 161 | 160784.9  | 2.206 | 7.5 | 0.5 | 7.0  | 0.9 | 0.4 | 0.72 | 0.81333 | 2100.0 | 12.9 | 2105.9 | 7.8  | 2111.6 | 9  | 0.551  |
| Erin-RM/ | 111 | 1779587.4 | 2.039 | 7.6 | 0.6 | 7.0  | 0.8 | 0.4 | 0.51 | 0.62448 | 2123.6 | 9.3  | 2108.9 | 7.3  | 2094.5 | 11 | -1.389 |
| Erin-RM/ | 77  | 64386.4   | 2.476 | 7.3 | 0.5 | 7.3  | 0.8 | 0.4 | 0.61 | 0.74862 | 2140.3 | 11.2 | 2151.6 | 7.3  | 2162.5 | 9  | 1.03   |
| Erin-RM/ | 198 | 599457.1  | 1.633 | 8.5 | 0.4 | 5.5  | 0.7 | 0.3 | 0.54 | 0.78629 | 1893.6 | 8.9  | 1897.8 | 5.9  | 1902.3 | 8  | 0.459  |
| Erin-RM/ | 362 | 113979.0  | 1.532 | 7.4 | 0.5 | 7.2  | 0.8 | 0.4 | 0.62 | 0.79245 | 2133.2 | 11.3 | 2138.4 | 7.0  | 2143.3 | 8  | 0.468  |
| Erin-RM/ | 41  | 30524.1   | 1.964 | 7.2 | 0.7 | 7.8  | 1.0 | 0.4 | 0.67 | 0.68694 | 2226.6 | 12.5 | 2203.5 | 8.7  | 2182.0 | 12 | -2.048 |
| Erin-RM/ | 302 | 526214.1  | 1.101 | 7.6 | 0.5 | 6.9  | 0.8 | 0.4 | 0.67 | 0.80898 | 2079.2 | 11.8 | 2094.4 | 7.3  | 2109.4 | 8  | 1.435  |
| Erin-RM/ | 197 | 76501.5   | 2.458 | 5.3 | 0.5 | 13.3 | 0.7 | 0.5 | 0.55 | 0.77102 | 2702.0 | 12.0 | 2703.3 | 6.7  | 2704.3 | 7  | 0.086  |
| Erin-RM/ | 161 | 59019.9   | 0.957 | 7.5 | 0.5 | 7.0  | 0.7 | 0.4 | 0.51 | 0.71501 | 2109.7 | 9.1  | 2113.9 | 6.3  | 2118.0 | 9  | 0.396  |
| Erin-RM/ | 128 | 87931.7   | 1.530 | 7.4 | 0.4 | 7.4  | 0.8 | 0.4 | 0.63 | 0.82599 | 2162.3 | 11.6 | 2156.4 | 6.8  | 2150.8 | 8  | -0.534 |

|          |     |           |       |     |     |      |     |     |      |         |        |      |        |      |        |    |        |
|----------|-----|-----------|-------|-----|-----|------|-----|-----|------|---------|--------|------|--------|------|--------|----|--------|
| Erin-RM/ | 144 | 52640.8   | 2.032 | 7.5 | 0.5 | 6.8  | 0.8 | 0.4 | 0.59 | 0.74411 | 2059.0 | 10.5 | 2087.7 | 7.1  | 2116.2 | 9  | 2.699  |
| Erin-RM/ | 179 | 70412.6   | 1.205 | 5.0 | 0.5 | 14.7 | 0.8 | 0.5 | 0.62 | 0.76837 | 2789.3 | 14.1 | 2797.3 | 7.7  | 2803.0 | 8  | 0.491  |
| Erin-RM/ | 176 | 470330.5  | 1.465 | 7.6 | 0.4 | 7.1  | 0.7 | 0.4 | 0.53 | 0.77472 | 2143.8 | 9.6  | 2126.3 | 6.1  | 2109.5 | 8  | -1.629 |
| Erin-RM/ | 195 | 184698.3  | 1.174 | 5.5 | 0.5 | 12.4 | 0.8 | 0.5 | 0.55 | 0.72693 | 2622.2 | 11.9 | 2633.5 | 7.1  | 2642.2 | 9  | 0.757  |
| Erin-RM/ | 96  | 82759.9   | 1.941 | 7.3 | 0.5 | 7.4  | 0.8 | 0.4 | 0.57 | 0.73773 | 2146.5 | 10.4 | 2159.2 | 6.9  | 2171.2 | 9  | 1.137  |
| Erin-RM/ | 76  | 58014.1   | 2.567 | 7.4 | 0.8 | 7.3  | 1.1 | 0.4 | 0.73 | 0.69549 | 2135.2 | 13.3 | 2147.5 | 9.4  | 2159.2 | 13 | 1.108  |
| Erin-RM/ | 229 | 133354.6  | 2.241 | 5.3 | 0.5 | 13.3 | 0.8 | 0.5 | 0.65 | 0.80590 | 2692.7 | 14.3 | 2698.4 | 7.6  | 2702.7 | 8  | 0.37   |
| Erin-RM/ | 23  | 91982.0   | 0.994 | 7.3 | 1.1 | 7.6  | 1.3 | 0.4 | 0.61 | 0.48611 | 2201.9 | 11.4 | 2184.2 | 11.3 | 2167.6 | 19 | -1.586 |
| Erin-RM/ | 118 | 36529.3   | 3.134 | 7.6 | 0.5 | 6.9  | 0.7 | 0.4 | 0.48 | 0.69535 | 2106.5 | 8.7  | 2098.7 | 6.2  | 2091.2 | 9  | -0.733 |
| Erin-RM/ | 115 | 5399124.2 | 1.979 | 7.4 | 0.5 | 7.3  | 0.7 | 0.4 | 0.56 | 0.77255 | 2162.6 | 10.3 | 2152.3 | 6.5  | 2142.4 | 8  | -0.945 |
| Erin-RM/ | 200 | 364804.0  | 2.056 | 8.5 | 0.6 | 5.5  | 0.9 | 0.3 | 0.69 | 0.76319 | 1892.9 | 11.3 | 1903.0 | 7.8  | 1914.1 | 10 | 1.106  |
| Erin-RM/ | 88  | 59259.7   | 1.223 | 5.4 | 0.6 | 13.3 | 1.0 | 0.5 | 0.77 | 0.79211 | 2734.8 | 17.2 | 2700.9 | 9.2  | 2675.5 | 10 | -2.217 |
| Erin-RM/ | 206 | 203812.0  | 2.378 | 5.3 | 0.5 | 13.4 | 0.8 | 0.5 | 0.66 | 0.80849 | 2709.3 | 14.7 | 2708.1 | 7.8  | 2707.2 | 8  | -0.078 |
| Erin-RM/ | 247 | 51223.5   | 3.727 | 7.5 | 0.4 | 7.1  | 0.8 | 0.4 | 0.63 | 0.83382 | 2124.2 | 11.4 | 2125.5 | 6.7  | 2126.8 | 7  | 0.123  |
| Erin-RM/ | 107 | 33342.6   | 2.616 | 7.2 | 0.4 | 7.9  | 0.7 | 0.4 | 0.58 | 0.81721 | 2238.2 | 10.9 | 2216.4 | 6.4  | 2196.4 | 7  | -1.903 |
| Erin-RM/ | 55  | 84667.1   | 1.421 | 5.5 | 0.5 | 12.4 | 0.9 | 0.5 | 0.68 | 0.77869 | 2614.8 | 14.5 | 2638.5 | 8.2  | 2656.7 | 9  | 1.58   |
| Erin-RM/ | 16  | 14348.8   | 0.646 | 6.7 | 0.9 | 8.7  | 1.3 | 0.4 | 0.98 | 0.74073 | 2301.5 | 19.0 | 2306.2 | 12.1 | 2310.3 | 15 | 0.378  |
| Erin-RM/ | 69  | 24035.2   | 1.258 | 8.2 | 0.5 | 5.8  | 0.9 | 0.4 | 0.71 | 0.82429 | 1937.3 | 11.8 | 1945.2 | 7.4  | 1953.7 | 9  | 0.84   |
| Erin-RM/ | 200 | 54130.2   | 1.805 | 7.2 | 0.5 | 7.7  | 0.8 | 0.4 | 0.64 | 0.79386 | 2198.1 | 11.8 | 2199.6 | 7.2  | 2201.1 | 8  | 0.135  |
| Erin-RM/ | 65  | 25787.4   | 2.442 | 4.5 | 0.5 | 17.7 | 0.9 | 0.6 | 0.74 | 0.81810 | 2938.6 | 17.6 | 2971.2 | 8.7  | 2993.3 | 8  | 1.828  |
| Erin-RM/ | 112 | 184678.2  | 3.715 | 7.5 | 0.4 | 7.4  | 0.7 | 0.4 | 0.52 | 0.79277 | 2199.8 | 9.8  | 2165.0 | 5.9  | 2132.2 | 7  | -3.169 |
| Erin-RM/ | 168 | 77882.6   | 2.642 | 4.2 | 0.5 | 19.3 | 0.9 | 0.6 | 0.76 | 0.82694 | 3030.8 | 18.5 | 3058.2 | 8.9  | 3076.2 | 8  | 1.478  |
| Erin-RM/ | 138 | 217612.7  | 2.152 | 7.5 | 0.5 | 7.2  | 0.8 | 0.4 | 0.63 | 0.77763 | 2146.9 | 11.6 | 2138.5 | 7.3  | 2130.4 | 9  | -0.776 |
| Erin-RM/ | 152 | 71122.4   | 1.806 | 8.2 | 0.5 | 6.0  | 0.7 | 0.4 | 0.53 | 0.75048 | 1964.8 | 9.0  | 1969.7 | 6.2  | 1974.8 | 8  | 0.506  |
| Erin-RM/ | 133 | 37764.5   | 1.905 | 8.2 | 0.5 | 6.0  | 0.8 | 0.4 | 0.65 | 0.78597 | 1989.7 | 11.1 | 1980.8 | 7.2  | 1971.5 | 9  | -0.922 |
| Erin-RM/ | 104 | 48700.9   | 1.426 | 7.3 | 0.4 | 7.4  | 0.7 | 0.4 | 0.58 | 0.79683 | 2160.7 | 10.7 | 2165.3 | 6.5  | 2169.7 | 8  | 0.412  |
| Erin-RM/ | 219 | 270127.6  | 2.350 | 5.3 | 0.4 | 13.3 | 0.7 | 0.5 | 0.61 | 0.82785 | 2691.8 | 13.3 | 2704.0 | 6.9  | 2713.1 | 7  | 0.788  |
| Erin-RM/ | 136 | 77111.5   | 3.682 | 6.1 | 0.4 | 10.6 | 0.7 | 0.5 | 0.50 | 0.76957 | 2477.0 | 10.3 | 2484.6 | 6.1  | 2490.8 | 7  | 0.554  |
| Erin-RM/ | 37  | 43569.1   | 1.872 | 7.1 | 0.6 | 7.6  | 1.0 | 0.4 | 0.79 | 0.79663 | 2161.5 | 14.6 | 2189.1 | 9.0  | 2215.0 | 10 | 2.417  |
| Erin-RM/ | 106 | 55229.0   | 2.505 | 7.5 | 0.5 | 7.2  | 1.0 | 0.4 | 0.91 | 0.89028 | 2153.0 | 16.6 | 2141.9 | 9.1  | 2131.2 | 8  | -1.023 |
| Erin-RM/ | 201 | 66642.0   | 0.830 | 7.8 | 0.5 | 6.5  | 0.8 | 0.4 | 0.69 | 0.82204 | 2033.3 | 12.0 | 2042.2 | 7.4  | 2051.3 | 8  | 0.874  |
| Erin-RM/ | 272 | 246182.2  | 2.239 | 5.3 | 0.4 | 13.4 | 0.7 | 0.5 | 0.52 | 0.76978 | 2696.0 | 11.5 | 2707.7 | 6.4  | 2716.5 | 7  | 0.755  |
| Erin-RM/ | 169 | 205736.8  | 1.376 | 7.5 | 0.5 | 7.1  | 0.7 | 0.4 | 0.53 | 0.75456 | 2126.5 | 9.6  | 2122.5 | 6.3  | 2118.6 | 8  | -0.372 |
| Erin-RM/ | 198 | 825521.8  | 2.151 | 7.4 | 0.4 | 7.3  | 0.7 | 0.4 | 0.54 | 0.80551 | 2137.5 | 9.9  | 2147.0 | 6.0  | 2156.2 | 7  | 0.867  |
| Erin-RM/ | 94  | 256569.2  | 3.061 | 7.4 | 0.5 | 7.4  | 0.8 | 0.4 | 0.62 | 0.75199 | 2150.9 | 11.4 | 2156.0 | 7.4  | 2160.8 | 10 | 0.456  |
| Erin-RM/ | 124 | 1720606.5 | 2.954 | 4.2 | 0.4 | 20.0 | 0.8 | 0.6 | 0.62 | 0.82157 | 3066.6 | 15.1 | 3092.5 | 7.3  | 3109.4 | 7  | 1.375  |
| Erin-RM/ | 167 | 163883.1  | 0.900 | 7.8 | 0.5 | 6.5  | 0.8 | 0.4 | 0.64 | 0.81712 | 2026.4 | 11.2 | 2041.4 | 6.9  | 2056.7 | 8  | 1.473  |
| Erin-RM/ | 115 | 131063.3  | 1.324 | 5.0 | 0.5 | 14.7 | 0.8 | 0.5 | 0.67 | 0.82200 | 2761.6 | 15.0 | 2793.9 | 7.7  | 2817.2 | 8  | 1.974  |
| Erin-RM/ | 146 | 2520210.1 | 2.065 | 8.6 | 0.5 | 5.4  | 0.8 | 0.3 | 0.60 | 0.78706 | 1878.3 | 9.7  | 1884.7 | 6.5  | 1891.7 | 8  | 0.711  |
| Erin-RM/ | 110 | 57964.6   | 1.351 | 4.2 | 0.5 | 20.5 | 0.8 | 0.6 | 0.59 | 0.75305 | 3152.6 | 14.7 | 3113.5 | 7.6  | 3088.3 | 8  | -2.079 |
| Erin-RM/ | 54  | 24778.4   | 1.770 | 7.3 | 0.6 | 7.4  | 0.8 | 0.4 | 0.50 | 0.64312 | 2142.0 | 9.0  | 2161.8 | 6.9  | 2180.7 | 10 | 1.775  |
| Erin-RM/ | 37  | 12659.0   | 3.716 | 7.5 | 0.8 | 7.0  | 1.2 | 0.4 | 0.95 | 0.76953 | 2097.1 | 16.9 | 2111.3 | 10.9 | 2125.1 | 14 | 1.314  |
| Erin-RM/ | 55  | 43671.5   | 1.677 | 7.3 | 0.6 | 7.5  | 1.0 | 0.4 | 0.75 | 0.76331 | 2187.5 | 14.0 | 2177.1 | 8.9  | 2167.2 | 11 | -0.936 |

|          |     |           |        |     |     |      |     |     |      |         |        |      |        |      |        |    |        |
|----------|-----|-----------|--------|-----|-----|------|-----|-----|------|---------|--------|------|--------|------|--------|----|--------|
| Erin-RM/ | 123 | 164911.7  | 0.837  | 7.6 | 0.5 | 6.8  | 0.8 | 0.4 | 0.61 | 0.76354 | 2067.8 | 10.8 | 2089.5 | 7.1  | 2110.8 | 9  | 2.037  |
| Erin-RM/ | 134 | 51983.5   | 1.862  | 7.5 | 0.6 | 7.4  | 0.9 | 0.4 | 0.63 | 0.72244 | 2194.0 | 11.8 | 2157.8 | 7.9  | 2123.5 | 11 | -3.319 |
| Erin-RM/ | 127 | 743970.5  | 2.388  | 5.0 | 0.4 | 15.3 | 0.9 | 0.6 | 0.76 | 0.87897 | 2848.6 | 17.5 | 2835.6 | 8.3  | 2826.4 | 7  | -0.788 |
| Erin-RM/ | 98  | 52434.7   | 2.457  | 7.6 | 0.5 | 7.0  | 0.8 | 0.4 | 0.71 | 0.83877 | 2132.0 | 12.9 | 2117.4 | 7.6  | 2103.2 | 8  | -1.371 |
| Erin-RM/ | 67  | 58566.4   | 1.213  | 5.3 | 0.6 | 13.6 | 0.9 | 0.5 | 0.58 | 0.66655 | 2742.3 | 12.9 | 2723.2 | 8.2  | 2709.1 | 11 | -1.227 |
| Erin-RM/ | 281 | 49273.5   | 1.516  | 7.2 | 0.4 | 7.7  | 0.7 | 0.4 | 0.48 | 0.73448 | 2203.9 | 9.0  | 2199.8 | 5.9  | 2195.9 | 8  | -0.365 |
| Erin-RM/ | 30  | 8811.3    | 2.249  | 7.2 | 0.9 | 7.6  | 1.1 | 0.4 | 0.62 | 0.56904 | 2190.1 | 11.5 | 2181.3 | 9.8  | 2172.9 | 16 | -0.793 |
| Erin-RM/ | 21  | 8978.5    | 19.694 | 7.4 | 0.9 | 6.8  | 1.3 | 0.4 | 0.86 | 0.64857 | 2040.3 | 15.0 | 2091.5 | 11.7 | 2142.3 | 18 | 4.758  |
| Erin-RM/ | 204 | 260276.2  | 2.349  | 5.3 | 0.4 | 13.4 | 0.6 | 0.5 | 0.43 | 0.76835 | 2710.1 | 9.6  | 2705.8 | 5.3  | 2702.7 | 6  | -0.276 |
| Erin-RM/ | 200 | 204753.9  | 1.676  | 7.6 | 0.4 | 6.9  | 0.7 | 0.4 | 0.54 | 0.82075 | 2108.1 | 9.8  | 2102.3 | 5.9  | 2096.7 | 7  | -0.545 |
| Erin-RM/ | 197 | 104891.7  | 1.719  | 7.6 | 0.4 | 6.9  | 0.7 | 0.4 | 0.53 | 0.77046 | 2109.8 | 9.5  | 2102.1 | 6.1  | 2094.5 | 8  | -0.733 |
| Erin-RM/ | 58  | 14621.6   | 2.025  | 7.0 | 0.7 | 8.0  | 0.9 | 0.4 | 0.62 | 0.69068 | 2249.4 | 11.8 | 2235.6 | 8.2  | 2223.0 | 11 | -1.186 |
| Erin-RM/ | 148 | 49760.9   | 1.376  | 7.6 | 0.4 | 6.9  | 0.7 | 0.4 | 0.54 | 0.78314 | 2109.5 | 9.8  | 2104.4 | 6.2  | 2099.3 | 8  | -0.487 |
| Erin-RM/ | 182 | 588299.1  | 2.208  | 5.4 | 0.4 | 13.3 | 0.6 | 0.5 | 0.46 | 0.77309 | 2707.5 | 10.2 | 2701.7 | 5.6  | 2697.4 | 6  | -0.374 |
| Erin-RM/ | 97  | 91036.7   | 1.721  | 5.0 | 0.4 | 14.9 | 0.8 | 0.5 | 0.68 | 0.85750 | 2812.8 | 15.6 | 2811.2 | 7.6  | 2810.1 | 7  | -0.095 |
| Erin-RM/ | 259 | 198659.4  | 2.448  | 7.4 | 0.4 | 7.1  | 0.6 | 0.4 | 0.51 | 0.80105 | 2107.7 | 9.1  | 2122.6 | 5.6  | 2137.1 | 7  | 1.378  |
| Erin-RM/ | 186 | 58808.0   | 2.015  | 8.4 | 0.4 | 5.7  | 0.7 | 0.4 | 0.50 | 0.75817 | 1948.5 | 8.3  | 1929.9 | 5.6  | 1909.9 | 8  | -2.024 |
| Erin-RM/ | 92  | 29101.2   | 2.241  | 8.5 | 0.5 | 5.5  | 0.7 | 0.3 | 0.55 | 0.73506 | 1911.4 | 9.1  | 1899.5 | 6.4  | 1886.6 | 9  | -1.314 |
| Erin-RM/ | 50  | 16440.2   | 1.447  | 7.5 | 0.6 | 6.9  | 0.9 | 0.4 | 0.69 | 0.74829 | 2071.7 | 12.2 | 2093.6 | 8.2  | 2115.2 | 11 | 2.055  |
| Erin-RM/ | 33  | 21303.9   | 1.350  | 6.3 | 0.5 | 9.7  | 0.8 | 0.5 | 0.68 | 0.79983 | 2396.1 | 13.6 | 2404.9 | 7.8  | 2412.4 | 9  | 0.676  |
| Erin-RM/ | 159 | 345004.1  | 1.926  | 5.4 | 0.5 | 13.0 | 0.8 | 0.5 | 0.64 | 0.78230 | 2661.4 | 13.9 | 2680.0 | 7.7  | 2694.1 | 8  | 1.212  |
| Erin-RM/ | 83  | 330090.5  | 2.048  | 7.2 | 0.5 | 7.7  | 0.7 | 0.4 | 0.53 | 0.71086 | 2212.4 | 9.9  | 2198.7 | 6.7  | 2186.0 | 9  | -1.208 |
| Erin-RM/ | 90  | 151679.6  | 1.329  | 7.3 | 0.5 | 7.5  | 0.7 | 0.4 | 0.50 | 0.71497 | 2176.3 | 9.2  | 2175.6 | 6.3  | 2174.9 | 9  | -0.062 |
| Erin-RM/ | 161 | 49360.6   | 2.102  | 5.3 | 0.4 | 13.2 | 0.6 | 0.5 | 0.47 | 0.74936 | 2672.2 | 10.2 | 2690.8 | 5.9  | 2704.8 | 7  | 1.205  |
| Erin-RM/ | 231 | 201783.5  | 2.265  | 5.3 | 0.3 | 13.5 | 0.6 | 0.5 | 0.54 | 0.83969 | 2715.6 | 11.9 | 2712.1 | 6.0  | 2709.4 | 6  | -0.227 |
| Erin-RM/ | 274 | 2555468.2 | 3.079  | 5.8 | 0.5 | 11.2 | 0.7 | 0.5 | 0.50 | 0.72312 | 2525.1 | 10.5 | 2538.2 | 6.5  | 2548.6 | 8  | 0.921  |
| Erin-RM/ | 54  | 28944.9   | 0.942  | 7.6 | 0.6 | 6.7  | 0.9 | 0.4 | 0.62 | 0.71344 | 2049.1 | 10.9 | 2066.7 | 7.7  | 2084.3 | 11 | 1.691  |
| Erin-RM/ | 17  | 7865.6    | 2.301  | 3.5 | 0.8 | 27.9 | 1.0 | 0.7 | 0.64 | 0.63812 | 3481.6 | 17.2 | 3415.9 | 9.8  | 3377.5 | 12 | -3.081 |
| Erin-RM/ | 206 | 798339.7  | 1.128  | 7.6 | 0.5 | 6.8  | 0.8 | 0.4 | 0.64 | 0.77202 | 2089.0 | 11.4 | 2091.2 | 7.3  | 2093.4 | 9  | 0.209  |
| Erin-RM/ | 99  | 26719.0   | 2.561  | 7.5 | 0.6 | 7.2  | 0.8 | 0.4 | 0.60 | 0.71619 | 2150.5 | 11.0 | 2133.9 | 7.5  | 2118.0 | 10 | -1.535 |
| Erin-RM/ | 196 | 1476247.2 | 1.930  | 7.3 | 0.5 | 7.5  | 0.7 | 0.4 | 0.55 | 0.76194 | 2166.3 | 10.2 | 2173.8 | 6.5  | 2180.8 | 8  | 0.667  |
| Erin-RM/ | 107 | 22690.6   | 1.641  | 7.5 | 0.5 | 7.1  | 0.8 | 0.4 | 0.57 | 0.72728 | 2127.8 | 10.4 | 2126.7 | 7.0  | 2125.6 | 10 | -0.107 |
| Erin-RM/ | 111 | 7522690.0 | 2.623  | 7.3 | 0.5 | 7.6  | 0.8 | 0.4 | 0.62 | 0.75385 | 2197.0 | 11.5 | 2186.3 | 7.3  | 2176.2 | 9  | -0.956 |
| Erin-RM/ | 86  | 32784.2   | 1.272  | 7.2 | 0.6 | 7.8  | 0.9 | 0.4 | 0.67 | 0.75088 | 2220.3 | 12.5 | 2205.4 | 8.0  | 2191.5 | 10 | -1.313 |
| Erin-RM/ | 187 | 51604.0   | 2.883  | 8.4 | 0.5 | 5.7  | 0.8 | 0.3 | 0.59 | 0.77634 | 1924.9 | 9.8  | 1925.4 | 6.6  | 1926.0 | 9  | 0.059  |
| Erin-RM/ | 205 | 84546.8   | 2.603  | 5.4 | 1.1 | 13.3 | 1.7 | 0.5 | 1.27 | 0.74994 | 2719.4 | 28.2 | 2701.1 | 16.0 | 2687.5 | 19 | -1.189 |
| Erin-RM/ | 124 | 88694.2   | 2.109  | 7.6 | 0.4 | 6.7  | 0.8 | 0.4 | 0.65 | 0.84704 | 2065.5 | 11.5 | 2076.6 | 6.8  | 2087.6 | 7  | 1.057  |
| Erin-RM/ | 100 | 219683.2  | 1.949  | 7.5 | 0.5 | 7.1  | 0.9 | 0.4 | 0.70 | 0.79775 | 2134.5 | 12.6 | 2128.4 | 7.8  | 2122.4 | 9  | -0.569 |
| Erin-RM/ | 275 | 947464.5  | 1.360  | 4.9 | 0.4 | 15.1 | 0.8 | 0.5 | 0.68 | 0.85464 | 2804.5 | 15.4 | 2818.8 | 7.5  | 2829.1 | 7  | 0.867  |
| Erin-RM/ | 382 | 63134.9   | 2.109  | 7.3 | 0.4 | 7.4  | 0.7 | 0.4 | 0.55 | 0.84084 | 2150.4 | 10.1 | 2158.7 | 5.9  | 2166.6 | 6  | 0.744  |
| Erin-RM/ | 224 | 477408.0  | 2.227  | 5.3 | 0.4 | 13.3 | 0.8 | 0.5 | 0.66 | 0.83406 | 2695.2 | 14.5 | 2698.1 | 7.4  | 2700.2 | 7  | 0.187  |
| Erin-RM/ | 142 | 39184.2   | 1.665  | 6.0 | 0.5 | 10.9 | 0.7 | 0.5 | 0.53 | 0.75344 | 2536.3 | 11.1 | 2515.7 | 6.5  | 2499.0 | 8  | -1.49  |
| Erin-RM/ | 97  | 35580.9   | 2.894  | 7.2 | 0.5 | 7.7  | 0.8 | 0.4 | 0.63 | 0.77434 | 2197.5 | 11.8 | 2198.6 | 7.4  | 2199.5 | 9  | 0.088  |

|          |     |           |       |     |     |      |     |     |      |         |        |      |        |      |        |    |        |
|----------|-----|-----------|-------|-----|-----|------|-----|-----|------|---------|--------|------|--------|------|--------|----|--------|
| Erin-RM/ | 115 | 43630.8   | 1.982 | 7.7 | 0.5 | 6.6  | 0.7 | 0.4 | 0.54 | 0.71982 | 2053.6 | 9.4  | 2056.7 | 6.6  | 2059.9 | 9  | 0.306  |
| Erin-RM/ | 131 | 31943.1   | 2.433 | 7.3 | 0.5 | 7.4  | 0.8 | 0.4 | 0.57 | 0.74478 | 2163.4 | 10.4 | 2157.3 | 6.8  | 2151.5 | 9  | -0.553 |
| Erin-RM/ | 112 | 69247.0   | 2.101 | 7.5 | 0.6 | 7.1  | 0.9 | 0.4 | 0.69 | 0.76316 | 2137.4 | 12.6 | 2124.5 | 8.1  | 2112.0 | 10 | -1.201 |
| Erin-RM/ | 375 | 161951.3  | 2.766 | 7.1 | 0.4 | 7.7  | 0.8 | 0.4 | 0.69 | 0.85992 | 2176.1 | 12.8 | 2197.6 | 7.2  | 2217.7 | 7  | 1.876  |
| Erin-RM/ | 453 | 195825.4  | 3.900 | 7.1 | 0.5 | 7.8  | 0.8 | 0.4 | 0.60 | 0.78741 | 2189.9 | 11.1 | 2208.0 | 6.8  | 2224.8 | 8  | 1.569  |
| Erin-RM/ | 69  | 15428.2   | 5.132 | 5.9 | 0.7 | 10.9 | 0.9 | 0.5 | 0.54 | 0.61299 | 2501.2 | 11.2 | 2511.9 | 8.2  | 2520.6 | 12 | 0.769  |
| Erin-RM/ | 59  | 59013.6   | 1.972 | 7.2 | 0.6 | 7.9  | 0.8 | 0.4 | 0.59 | 0.71856 | 2236.8 | 11.2 | 2218.0 | 7.4  | 2200.7 | 10 | -1.64  |
| Erin-RM/ | 46  | 276210.1  | 2.135 | 7.4 | 0.5 | 7.1  | 0.7 | 0.4 | 0.51 | 0.69799 | 2097.2 | 9.2  | 2124.5 | 6.6  | 2150.9 | 9  | 2.498  |
| Erin-RM/ | 205 | 381380.0  | 2.594 | 7.4 | 0.6 | 7.1  | 0.9 | 0.4 | 0.65 | 0.75325 | 2121.9 | 11.8 | 2128.5 | 7.7  | 2135.0 | 10 | 0.615  |
| Erin-RM/ | 164 | 260203.6  | 2.324 | 5.4 | 0.5 | 13.4 | 0.7 | 0.5 | 0.54 | 0.75666 | 2738.1 | 12.1 | 2710.8 | 6.8  | 2690.4 | 8  | -1.772 |
| Erin-RM/ | 232 | 87784.8   | 3.187 | 7.6 | 0.5 | 6.9  | 0.7 | 0.4 | 0.48 | 0.71007 | 2098.3 | 8.5  | 2099.2 | 5.9  | 2100.1 | 8  | 0.087  |
| Erin-RM/ | 226 | 68169.1   | 1.235 | 8.1 | 0.5 | 6.0  | 0.8 | 0.4 | 0.71 | 0.83776 | 1967.7 | 12.1 | 1971.3 | 7.4  | 1975.2 | 8  | 0.381  |
| Erin-RM/ | 219 | 65103.1   | 2.522 | 5.3 | 0.4 | 13.3 | 0.7 | 0.5 | 0.60 | 0.80438 | 2714.5 | 13.3 | 2704.1 | 7.1  | 2696.4 | 7  | -0.673 |
| Erin-RM/ | 171 | 50373.7   | 1.033 | 7.9 | 0.4 | 6.6  | 0.8 | 0.4 | 0.67 | 0.84009 | 2069.8 | 11.9 | 2053.8 | 7.0  | 2037.8 | 8  | -1.57  |
| Erin-RM/ | 157 | 80820.6   | 2.117 | 5.4 | 0.4 | 13.4 | 0.7 | 0.5 | 0.57 | 0.80106 | 2739.6 | 12.6 | 2708.9 | 6.7  | 2686.0 | 7  | -1.995 |
| Erin-RM/ | 150 | 27327.2   | 2.450 | 8.5 | 0.5 | 5.2  | 0.8 | 0.3 | 0.62 | 0.76544 | 1826.6 | 9.8  | 1857.6 | 6.9  | 1892.6 | 9  | 3.486  |
| Erin-RM/ | 207 | 162757.3  | 2.143 | 5.3 | 0.4 | 13.2 | 0.7 | 0.5 | 0.59 | 0.79923 | 2679.3 | 13.0 | 2694.9 | 7.0  | 2706.6 | 7  | 1.009  |
| Erin-RM/ | 193 | 503857.2  | 2.184 | 5.4 | 0.5 | 13.2 | 0.8 | 0.5 | 0.61 | 0.75264 | 2684.6 | 13.4 | 2691.3 | 7.6  | 2696.4 | 9  | 0.438  |
| Erin-RM/ | 177 | 120895.8  | 0.928 | 7.3 | 0.5 | 7.6  | 0.8 | 0.4 | 0.59 | 0.77410 | 2184.3 | 10.9 | 2182.6 | 6.8  | 2181.0 | 8  | -0.154 |
| Erin-RM/ | 130 | 51729.1   | 1.923 | 7.2 | 0.6 | 7.8  | 0.8 | 0.4 | 0.63 | 0.73915 | 2218.8 | 11.8 | 2209.5 | 7.6  | 2200.9 | 10 | -0.815 |
| Erin-RM/ | 197 | 68400.3   | 3.143 | 7.3 | 0.4 | 7.5  | 0.6 | 0.4 | 0.48 | 0.74404 | 2165.2 | 8.9  | 2169.9 | 5.8  | 2174.4 | 8  | 0.424  |
| Erin-RM/ | 116 | 369445.4  | 2.084 | 7.4 | 0.5 | 7.4  | 0.7 | 0.4 | 0.45 | 0.63360 | 2155.0 | 8.2  | 2156.7 | 6.3  | 2158.4 | 10 | 0.156  |
| Erin-RM/ | 255 | 75065.5   | 2.089 | 5.3 | 0.4 | 13.1 | 0.6 | 0.5 | 0.46 | 0.77980 | 2665.6 | 10.1 | 2688.1 | 5.6  | 2705.0 | 6  | 1.457  |
| Erin-RM/ | 99  | 26213.0   | 0.483 | 8.1 | 0.5 | 6.0  | 0.8 | 0.4 | 0.68 | 0.80470 | 1963.2 | 11.4 | 1975.4 | 7.3  | 1988.1 | 9  | 1.252  |
| Erin-RM/ | 108 | 2632600.6 | 1.930 | 7.2 | 0.5 | 7.6  | 0.9 | 0.4 | 0.76 | 0.85197 | 2179.6 | 14.0 | 2186.2 | 8.0  | 2192.3 | 8  | 0.582  |
| Erin-RM/ | 221 | 56827.2   | 2.323 | 5.3 | 0.3 | 13.1 | 0.6 | 0.5 | 0.52 | 0.83803 | 2678.5 | 11.4 | 2690.4 | 5.9  | 2699.3 | 6  | 0.772  |
| Erin-RM/ | 161 | 69798.3   | 2.159 | 7.2 | 0.6 | 7.7  | 0.9 | 0.4 | 0.64 | 0.75050 | 2186.1 | 11.8 | 2195.5 | 7.7  | 2204.1 | 10 | 0.817  |
| Erin-RM/ | 127 | 285343.7  | 2.022 | 7.2 | 0.4 | 7.7  | 0.7 | 0.4 | 0.60 | 0.81031 | 2185.3 | 11.1 | 2194.7 | 6.7  | 2203.5 | 8  | 0.822  |
| Erin-RM/ | 84  | 73385.3   | 2.118 | 7.6 | 0.6 | 6.9  | 0.9 | 0.4 | 0.60 | 0.69089 | 2096.5 | 10.7 | 2098.3 | 7.7  | 2100.1 | 11 | 0.171  |
| Erin-RM/ | 131 | 70473.5   | 1.993 | 6.7 | 0.5 | 8.5  | 0.8 | 0.4 | 0.61 | 0.80209 | 2256.5 | 11.6 | 2283.7 | 6.9  | 2308.1 | 8  | 2.235  |
| Erin-RM/ | 221 | 112128.2  | 1.818 | 5.4 | 0.4 | 13.2 | 0.7 | 0.5 | 0.58 | 0.80634 | 2685.5 | 12.7 | 2692.1 | 6.8  | 2697.0 | 7  | 0.428  |
| Erin-RM/ | 92  | 31093.7   | 1.105 | 7.4 | 0.5 | 7.3  | 0.8 | 0.4 | 0.62 | 0.80709 | 2148.7 | 11.4 | 2147.5 | 6.9  | 2146.3 | 8  | -0.113 |
| Erin-RM/ | 169 | 612479.6  | 2.856 | 7.6 | 0.5 | 6.9  | 0.7 | 0.4 | 0.56 | 0.76055 | 2090.3 | 10.0 | 2099.5 | 6.5  | 2108.6 | 8  | 0.864  |
| Erin-RM/ | 228 | 218562.9  | 1.975 | 7.6 | 0.5 | 7.0  | 0.8 | 0.4 | 0.63 | 0.79136 | 2118.8 | 11.4 | 2111.0 | 7.1  | 2103.5 | 9  | -0.729 |
| Erin-RM/ | 35  | 37202.9   | 1.437 | 6.8 | 0.6 | 8.3  | 1.0 | 0.4 | 0.81 | 0.80703 | 2242.3 | 15.2 | 2264.1 | 9.0  | 2283.8 | 10 | 1.82   |
| Erin-RM/ | 189 | 126742.2  | 2.208 | 5.4 | 1.1 | 12.9 | 1.7 | 0.5 | 1.30 | 0.77185 | 2672.7 | 28.5 | 2676.0 | 15.9 | 2678.5 | 18 | 0.215  |
| Erin-RM/ | 84  | 51921.4   | 0.982 | 5.5 | 0.4 | 12.7 | 0.8 | 0.5 | 0.70 | 0.85042 | 2670.7 | 15.3 | 2656.6 | 7.7  | 2645.8 | 7  | -0.941 |
| Erin-RM/ | 61  | 50299.7   | 1.183 | 7.2 | 0.5 | 7.7  | 2.3 | 0.4 | 2.25 | 0.97390 | 2182.1 | 41.6 | 2191.1 | 20.7 | 2199.4 | 9  | 0.786  |
| Erin-RM/ | 82  | 2158043.7 | 1.737 | 7.4 | 0.5 | 7.3  | 0.8 | 0.4 | 0.63 | 0.77352 | 2155.6 | 11.5 | 2150.7 | 7.2  | 2146.0 | 9  | -0.448 |
| Erin-RM/ | 281 | 133886.7  | 1.253 | 8.5 | 0.5 | 5.5  | 0.8 | 0.3 | 0.66 | 0.80903 | 1907.5 | 10.9 | 1901.4 | 7.0  | 1894.7 | 9  | -0.676 |
| Erin-RM/ | 150 | 116640.5  | 1.227 | 8.2 | 0.4 | 6.1  | 0.7 | 0.4 | 0.62 | 0.85096 | 2006.9 | 10.8 | 1989.2 | 6.4  | 1970.8 | 7  | -1.833 |
| Erin-RM/ | 116 | 37330.0   | 1.360 | 7.1 | 0.5 | 7.9  | 0.8 | 0.4 | 0.61 | 0.75420 | 2230.7 | 11.4 | 2218.9 | 7.3  | 2208.0 | 9  | -1.025 |
| Erin-RM/ | 105 | 23490.2   | 2.723 | 7.3 | 0.5 | 7.5  | 0.8 | 0.4 | 0.58 | 0.73537 | 2187.7 | 10.7 | 2173.3 | 7.0  | 2159.8 | 9  | -1.289 |

|          |     |           |       |      |     |      |     |     |      |         |        |      |        |     |        |    |        |
|----------|-----|-----------|-------|------|-----|------|-----|-----|------|---------|--------|------|--------|-----|--------|----|--------|
| Erin-RM/ | 161 | 67778.2   | 2.966 | 7.4  | 0.5 | 7.2  | 0.8 | 0.4 | 0.56 | 0.74093 | 2131.8 | 10.2 | 2138.1 | 6.7 | 2144.2 | 9  | 0.578  |
| Erin-RM/ | 38  | 11413.9   | 1.170 | 7.5  | 0.7 | 7.2  | 0.9 | 0.4 | 0.57 | 0.62405 | 2158.7 | 10.4 | 2139.2 | 8.1 | 2120.5 | 12 | -1.801 |
| Erin-RM/ | 384 | 110943.4  | 1.137 | 4.8  | 0.4 | 15.7 | 0.7 | 0.5 | 0.52 | 0.78736 | 2818.8 | 11.9 | 2857.1 | 6.3 | 2884.1 | 7  | 2.266  |
| Erin-RM/ | 225 | 100202.0  | 1.643 | 5.3  | 0.4 | 13.4 | 0.8 | 0.5 | 0.66 | 0.84586 | 2695.2 | 14.5 | 2710.9 | 7.4 | 2722.7 | 7  | 1.009  |
| Erin-RM/ | 96  | 74484.8   | 1.818 | 7.3  | 0.5 | 7.5  | 0.7 | 0.4 | 0.51 | 0.69633 | 2171.1 | 9.4  | 2169.4 | 6.5 | 2167.8 | 9  | -0.151 |
| Erin-RM/ | 80  | 37656.6   | 1.313 | 7.5  | 0.7 | 6.9  | 0.9 | 0.4 | 0.61 | 0.66866 | 2090.0 | 10.9 | 2103.7 | 8.1 | 2117.1 | 12 | 1.278  |
| Erin-RM/ | 123 | 182297.7  | 3.498 | 7.5  | 0.4 | 7.2  | 0.9 | 0.4 | 0.75 | 0.86002 | 2141.5 | 13.7 | 2138.6 | 7.8 | 2135.8 | 8  | -0.269 |
| Erin-RM/ | 473 | 474725.7  | 2.708 | 7.7  | 0.4 | 6.6  | 0.6 | 0.4 | 0.52 | 0.82370 | 2044.8 | 9.2  | 2064.1 | 5.6 | 2083.4 | 6  | 1.856  |
| Erin-RM/ | 68  | 54045.4   | 1.974 | 7.6  | 0.5 | 7.0  | 0.9 | 0.4 | 0.71 | 0.81105 | 2105.7 | 12.8 | 2107.1 | 7.8 | 2108.4 | 9  | 0.129  |
| Erin-RM/ | 127 | 34463.0   | 2.506 | 5.4  | 0.5 | 13.1 | 0.7 | 0.5 | 0.55 | 0.73730 | 2671.7 | 12.0 | 2684.0 | 7.0 | 2693.3 | 8  | 0.804  |
| Erin-RM/ | 123 | 57571.1   | 2.235 | 5.3  | 0.4 | 13.0 | 0.7 | 0.5 | 0.59 | 0.82615 | 2649.8 | 12.8 | 2679.6 | 6.7 | 2702.2 | 7  | 1.941  |
| Erin-RM/ | 184 | 1450188.3 | 1.858 | 3.7  | 0.4 | 24.3 | 0.7 | 0.7 | 0.52 | 0.78122 | 3239.8 | 13.3 | 3279.1 | 6.5 | 3303.2 | 7  | 1.918  |
| Erin-RM/ | 97  | 21915.6   | 2.705 | 7.5  | 0.5 | 7.3  | 0.9 | 0.4 | 0.66 | 0.77175 | 2173.2 | 12.1 | 2144.7 | 7.6 | 2117.6 | 9  | -2.622 |
| Erin-RM/ | 174 | 49707.4   | 1.565 | 7.6  | 0.4 | 6.9  | 0.7 | 0.4 | 0.56 | 0.80531 | 2079.0 | 9.9  | 2095.6 | 6.1 | 2111.9 | 7  | 1.561  |
| Erin-RM/ | 198 | 542298.7  | 2.502 | 5.3  | 0.5 | 13.2 | 0.9 | 0.5 | 0.68 | 0.78922 | 2677.9 | 15.0 | 2691.4 | 8.2 | 2701.6 | 9  | 0.88   |
| Erin-RM/ | 81  | 49000.8   | 1.018 | 5.0  | 0.5 | 14.9 | 0.8 | 0.5 | 0.65 | 0.80948 | 2807.4 | 14.8 | 2810.3 | 7.7 | 2812.4 | 8  | 0.177  |
| Erin-RM/ | 198 | 135612.4  | 2.645 | 7.4  | 0.4 | 7.2  | 0.8 | 0.4 | 0.65 | 0.83101 | 2125.8 | 11.7 | 2133.8 | 6.9 | 2141.5 | 8  | 0.732  |
| Erin-RM/ | 303 | 93602.5   | 2.352 | 5.3  | 0.5 | 13.2 | 0.7 | 0.5 | 0.49 | 0.69081 | 2664.4 | 10.6 | 2691.6 | 6.6 | 2712.1 | 8  | 1.761  |
| Erin-RM/ | 114 | 31971.5   | 2.032 | 6.7  | 0.5 | 8.7  | 0.8 | 0.4 | 0.57 | 0.75078 | 2303.5 | 10.9 | 2305.0 | 6.9 | 2306.4 | 9  | 0.127  |
| Erin-RM/ | 178 | 398094.6  | 2.093 | 5.7  | 0.4 | 11.5 | 0.7 | 0.5 | 0.62 | 0.83620 | 2546.4 | 12.9 | 2566.3 | 6.9 | 2582.0 | 7  | 1.379  |
| Erin-RM/ | 92  | 22481.1   | 0.850 | 7.6  | 0.4 | 6.8  | 0.7 | 0.4 | 0.60 | 0.80358 | 2081.9 | 10.7 | 2084.8 | 6.6 | 2087.5 | 8  | 0.267  |
| Erin-RM/ | 170 | 64316.6   | 2.215 | 5.4  | 0.3 | 13.2 | 0.5 | 0.5 | 0.43 | 0.83221 | 2686.6 | 9.5  | 2693.0 | 4.9 | 2697.7 | 5  | 0.412  |
| Erin-RM/ | 188 | 59473.3   | 1.779 | 8.1  | 0.6 | 6.1  | 0.8 | 0.4 | 0.53 | 0.68165 | 1990.1 | 9.0  | 1986.7 | 6.8 | 1983.2 | 10 | -0.349 |
| Erin-RM/ | 316 | 165161.9  | 1.295 | 7.6  | 0.4 | 7.0  | 0.7 | 0.4 | 0.53 | 0.79400 | 2110.3 | 9.5  | 2111.6 | 5.9 | 2112.9 | 7  | 0.122  |
| Erin-RM/ | 54  | 42773.8   | 2.116 | 5.4  | 0.6 | 13.3 | 0.9 | 0.5 | 0.66 | 0.76390 | 2704.0 | 14.5 | 2700.5 | 8.1 | 2697.8 | 9  | -0.231 |
| Erin-RM/ | 275 | 82101.2   | 1.631 | 7.5  | 0.4 | 7.0  | 0.8 | 0.4 | 0.64 | 0.82268 | 2107.4 | 11.6 | 2112.1 | 7.0 | 2116.7 | 8  | 0.441  |
| Erin-RM/ | 232 | 134362.7  | 2.292 | 5.3  | 0.4 | 13.1 | 0.6 | 0.5 | 0.45 | 0.72764 | 2651.3 | 9.7  | 2684.5 | 5.8 | 2709.6 | 7  | 2.153  |
| Erin-RM/ | 150 | 67113.1   | 2.748 | 4.2  | 0.5 | 19.0 | 0.8 | 0.6 | 0.58 | 0.76414 | 2967.1 | 13.8 | 3041.0 | 7.3 | 3090.2 | 8  | 3.983  |
| Erin-RM/ | 82  | 60795.4   | 2.121 | 6.9  | 0.5 | 8.1  | 0.7 | 0.4 | 0.57 | 0.76298 | 2219.0 | 10.7 | 2240.8 | 6.8 | 2260.7 | 8  | 1.845  |
| Erin-RM/ | 164 | 193770.0  | 2.900 | 4.8  | 0.5 | 15.9 | 1.0 | 0.6 | 0.83 | 0.87303 | 2870.6 | 19.3 | 2869.3 | 9.1 | 2868.4 | 8  | -0.077 |
| Erin-RM/ | 53  | 9583.8    | 1.220 | 15.0 | 1.4 | 0.9  | 1.9 | 0.1 | 0.53 | 0.28665 | 626.3  | 3.2  | 655.5  | 9.0 | 757.1  | 38 | 17.28  |
| Erin-RM/ | 100 | 48494.4   | 2.722 | 7.2  | 0.7 | 7.8  | 0.9 | 0.4 | 0.66 | 0.70856 | 2206.8 | 12.2 | 2204.6 | 8.3 | 2202.6 | 11 | -0.192 |
| Erin-RM/ | 181 | 144387.2  | 1.484 | 7.2  | 0.5 | 7.7  | 0.8 | 0.4 | 0.56 | 0.71691 | 2179.1 | 10.3 | 2192.2 | 7.0 | 2204.4 | 9  | 1.151  |
| Erin-RM/ | 52  | 160644.7  | 1.671 | 7.3  | 0.6 | 7.6  | 0.8 | 0.4 | 0.57 | 0.71442 | 2183.0 | 10.5 | 2180.3 | 7.1 | 2177.8 | 10 | -0.24  |
| Erin-RM/ | 268 | 188886.4  | 1.963 | 5.3  | 0.4 | 13.1 | 0.8 | 0.5 | 0.69 | 0.83735 | 2657.2 | 14.9 | 2688.1 | 7.7 | 2711.4 | 7  | 2      |
| Erin-RM/ | 171 | 203005.3  | 2.190 | 5.2  | 0.4 | 13.6 | 0.7 | 0.5 | 0.57 | 0.80938 | 2689.5 | 12.5 | 2720.2 | 6.6 | 2743.0 | 7  | 1.95   |
| Erin-RM/ | 177 | 95981.7   | 1.735 | 5.3  | 0.5 | 13.4 | 0.8 | 0.5 | 0.64 | 0.79215 | 2706.5 | 14.2 | 2707.2 | 7.7 | 2707.8 | 8  | 0.049  |
| Erin-RM/ | 94  | 610132.8  | 1.892 | 7.5  | 0.6 | 7.1  | 0.8 | 0.4 | 0.52 | 0.68379 | 2124.3 | 9.4  | 2122.8 | 6.8 | 2121.4 | 10 | -0.139 |
| Erin-RM/ | 82  | 25547.0   | 2.352 | 7.5  | 0.5 | 7.0  | 0.9 | 0.4 | 0.67 | 0.76990 | 2117.6 | 12.0 | 2116.6 | 7.7 | 2115.7 | 10 | -0.091 |
| Erin-RM/ | 136 | 210613.6  | 1.409 | 7.6  | 0.5 | 7.2  | 0.7 | 0.4 | 0.46 | 0.64503 | 2160.6 | 8.5  | 2133.8 | 6.4 | 2108.1 | 10 | -2.487 |
| Erin-RM/ | 277 | 48795.4   | 1.817 | 8.5  | 0.5 | 5.5  | 0.9 | 0.3 | 0.71 | 0.79297 | 1889.1 | 11.6 | 1898.7 | 7.7 | 1909.2 | 10 | 1.053  |
| Erin-RM/ | 154 | 139086.5  | 1.399 | 4.3  | 0.5 | 19.0 | 0.8 | 0.6 | 0.65 | 0.80850 | 3044.6 | 15.7 | 3041.4 | 7.7 | 3039.3 | 8  | -0.176 |
| Erin-RM/ | 46  | 121717.7  | 0.560 | 7.6  | 0.7 | 7.0  | 1.0 | 0.4 | 0.63 | 0.66377 | 2116.2 | 11.4 | 2112.1 | 8.5 | 2108.1 | 13 | -0.385 |

|          |     |           |       |     |     |      |     |     |      |         |        |      |        |      |        |    |        |
|----------|-----|-----------|-------|-----|-----|------|-----|-----|------|---------|--------|------|--------|------|--------|----|--------|
| Erin-RM/ | 171 | 46327.6   | 3.243 | 7.4 | 0.5 | 7.3  | 0.7 | 0.4 | 0.53 | 0.70754 | 2137.5 | 9.6  | 2143.3 | 6.6  | 2148.9 | 9  | 0.529  |
| Erin-RM/ | 89  | 36382.2   | 2.424 | 7.4 | 0.6 | 7.3  | 0.9 | 0.4 | 0.66 | 0.71954 | 2152.5 | 12.1 | 2144.5 | 8.2  | 2136.9 | 11 | -0.727 |
| Erin-RM/ | 95  | 69444.3   | 2.022 | 7.2 | 0.6 | 7.8  | 0.9 | 0.4 | 0.70 | 0.76788 | 2232.8 | 13.2 | 2208.6 | 8.2  | 2186.2 | 10 | -2.132 |
| Erin-RM/ | 246 | 46530.6   | 1.064 | 8.0 | 0.5 | 6.1  | 0.8 | 0.4 | 0.63 | 0.80250 | 1982.0 | 10.7 | 1992.7 | 6.8  | 2003.7 | 8  | 1.084  |
| Erin-RM/ | 173 | 88364.7   | 2.628 | 5.3 | 0.4 | 13.2 | 0.6 | 0.5 | 0.52 | 0.80943 | 2670.5 | 11.3 | 2692.3 | 6.0  | 2708.6 | 6  | 1.405  |
| Erin-RM/ | 130 | 55906.1   | 0.775 | 7.6 | 0.4 | 7.0  | 0.7 | 0.4 | 0.53 | 0.81178 | 2109.8 | 9.6  | 2109.4 | 5.8  | 2109.0 | 7  | -0.041 |
| Erin-RM/ | 68  | 57955.1   | 1.389 | 7.5 | 0.6 | 7.1  | 0.9 | 0.4 | 0.71 | 0.76170 | 2130.6 | 12.8 | 2124.1 | 8.3  | 2117.9 | 11 | -0.599 |
| Erin-RM/ | 336 | 71375.1   | 1.360 | 5.6 | 0.4 | 12.2 | 0.7 | 0.5 | 0.54 | 0.77833 | 2616.6 | 11.6 | 2622.0 | 6.5  | 2626.2 | 7  | 0.365  |
| Erin-RM/ | 230 | 134334.9  | 1.750 | 7.7 | 0.5 | 6.8  | 0.8 | 0.4 | 0.66 | 0.78998 | 2078.6 | 11.8 | 2082.6 | 7.4  | 2086.6 | 9  | 0.382  |
| Erin-RM/ | 85  | 50692.1   | 2.194 | 4.4 | 0.5 | 18.3 | 0.8 | 0.6 | 0.67 | 0.82527 | 3006.6 | 16.1 | 3004.5 | 7.8  | 3003.1 | 7  | -0.119 |
| Erin-RM/ | 129 | 57030.8   | 2.206 | 5.4 | 0.5 | 13.5 | 0.7 | 0.5 | 0.53 | 0.71733 | 2746.3 | 11.9 | 2717.1 | 7.0  | 2695.5 | 9  | -1.885 |
| Erin-RM/ | 78  | 73192.6   | 2.388 | 7.1 | 0.6 | 7.8  | 0.9 | 0.4 | 0.69 | 0.74619 | 2187.6 | 12.8 | 2208.4 | 8.3  | 2227.7 | 11 | 1.801  |
| Erin-RM/ | 57  | 29464.6   | 1.708 | 5.4 | 0.6 | 13.3 | 0.8 | 0.5 | 0.58 | 0.71430 | 2703.3 | 12.8 | 2698.0 | 7.7  | 2694.0 | 9  | -0.344 |
| Erin-RM/ | 220 | 124670.1  | 2.183 | 8.5 | 0.5 | 5.6  | 0.7 | 0.3 | 0.51 | 0.73008 | 1933.1 | 8.5  | 1922.4 | 6.0  | 1910.8 | 9  | -1.166 |
| Erin-RM/ | 180 | 68827.1   | 1.073 | 7.2 | 0.4 | 7.9  | 0.7 | 0.4 | 0.60 | 0.82584 | 2233.4 | 11.3 | 2220.6 | 6.5  | 2208.8 | 7  | -1.114 |
| Erin-RM/ | 466 | 186053.2  | 2.486 | 7.7 | 0.4 | 6.6  | 0.7 | 0.4 | 0.63 | 0.86511 | 2047.4 | 11.0 | 2061.2 | 6.4  | 2075.0 | 6  | 1.333  |
| Erin-RM/ | 256 | 60240.7   | 2.602 | 8.5 | 0.4 | 5.5  | 0.7 | 0.3 | 0.56 | 0.80787 | 1912.5 | 9.2  | 1907.0 | 5.9  | 1901.0 | 7  | -0.602 |
| Erin-RM/ | 235 | 571959.9  | 2.321 | 5.3 | 0.5 | 13.2 | 0.8 | 0.5 | 0.54 | 0.69862 | 2671.3 | 11.7 | 2693.8 | 7.2  | 2710.7 | 9  | 1.454  |
| Erin-RM/ | 145 | 51551.8   | 1.481 | 7.3 | 0.5 | 7.5  | 0.9 | 0.4 | 0.67 | 0.77258 | 2169.2 | 12.3 | 2171.4 | 7.8  | 2173.5 | 10 | 0.197  |
| Erin-RM/ | 136 | 427634.4  | 2.166 | 7.5 | 0.6 | 7.2  | 0.9 | 0.4 | 0.64 | 0.72914 | 2145.0 | 11.7 | 2135.3 | 7.8  | 2126.0 | 11 | -0.895 |
| Erin-RM/ | 204 | 125958.0  | 1.268 | 6.1 | 0.5 | 10.3 | 0.8 | 0.5 | 0.68 | 0.80770 | 2451.4 | 13.9 | 2462.0 | 7.8  | 2470.8 | 8  | 0.787  |
| Erin-RM/ | 126 | 108856.1  | 3.190 | 7.3 | 0.6 | 7.7  | 0.9 | 0.4 | 0.71 | 0.78955 | 2204.2 | 13.2 | 2191.5 | 8.1  | 2179.5 | 10 | -1.131 |
| Erin-RM/ | 61  | 79410.9   | 3.106 | 7.3 | 0.6 | 7.6  | 0.8 | 0.4 | 0.55 | 0.69600 | 2185.7 | 10.2 | 2179.2 | 7.1  | 2173.1 | 10 | -0.581 |
| Erin-RM/ | 56  | 93640.8   | 1.577 | 7.4 | 0.7 | 7.6  | 1.1 | 0.4 | 0.88 | 0.76864 | 2213.2 | 16.5 | 2183.7 | 10.3 | 2156.1 | 13 | -2.647 |
| Erin-RM/ | 149 | 32949.8   | 2.116 | 7.4 | 0.5 | 7.3  | 0.8 | 0.4 | 0.60 | 0.74016 | 2147.4 | 10.9 | 2148.6 | 7.2  | 2149.7 | 9  | 0.104  |
| Erin-RM/ | 154 | 56467.2   | 2.799 | 7.5 | 0.4 | 7.2  | 0.8 | 0.4 | 0.68 | 0.84688 | 2157.0 | 12.5 | 2138.8 | 7.2  | 2121.3 | 7  | -1.681 |
| Erin-RM/ | 201 | 2159451.0 | 2.211 | 5.3 | 0.4 | 13.5 | 0.8 | 0.5 | 0.68 | 0.85333 | 2718.0 | 15.0 | 2713.0 | 7.5  | 2709.3 | 7  | -0.323 |
| Erin-RM/ | 319 | 111259.3  | 3.174 | 7.6 | 0.4 | 6.8  | 0.6 | 0.4 | 0.48 | 0.77557 | 2084.5 | 8.6  | 2091.0 | 5.5  | 2097.3 | 7  | 0.611  |
| Erin-RM/ | 287 | 213437.5  | 2.517 | 7.5 | 0.5 | 7.1  | 0.8 | 0.4 | 0.60 | 0.79750 | 2114.2 | 10.9 | 2118.3 | 6.7  | 2122.3 | 8  | 0.378  |
| Erin-RM/ | 120 | 1780736.0 | 1.068 | 5.5 | 0.4 | 12.7 | 0.7 | 0.5 | 0.59 | 0.80498 | 2655.1 | 12.8 | 2654.0 | 6.9  | 2653.2 | 7  | -0.071 |
| Erin-RM/ | 124 | 48649.7   | 1.967 | 7.6 | 0.5 | 6.9  | 0.8 | 0.4 | 0.68 | 0.81617 | 2107.2 | 12.1 | 2104.5 | 7.3  | 2101.7 | 8  | -0.261 |
| Erin-RM/ | 115 | 77907.4   | 1.671 | 5.3 | 0.4 | 13.4 | 0.7 | 0.5 | 0.59 | 0.83789 | 2711.0 | 13.1 | 2708.7 | 6.7  | 2707.0 | 6  | -0.15  |
| Erin-RM/ | 59  | 222843.8  | 2.105 | 5.3 | 0.5 | 13.5 | 0.8 | 0.5 | 0.60 | 0.76871 | 2721.4 | 13.2 | 2717.7 | 7.3  | 2715.0 | 8  | -0.237 |
| Erin-RM/ | 46  | 19517.5   | 3.062 | 7.4 | 0.6 | 7.2  | 0.9 | 0.4 | 0.61 | 0.70198 | 2109.1 | 11.0 | 2131.8 | 7.8  | 2153.7 | 11 | 2.072  |
| Erin-RM/ | 340 | 116298.4  | 1.946 | 8.5 | 0.4 | 5.5  | 0.8 | 0.3 | 0.61 | 0.80697 | 1887.6 | 10.0 | 1899.8 | 6.5  | 1913.1 | 8  | 1.331  |
| Erin-RM/ | 289 | 93184.4   | 2.064 | 5.3 | 0.3 | 13.3 | 0.7 | 0.5 | 0.59 | 0.86612 | 2670.4 | 12.8 | 2700.4 | 6.4  | 2722.9 | 6  | 1.926  |
| Erin-RM/ | 130 | 51720.8   | 1.721 | 7.5 | 0.6 | 7.0  | 0.8 | 0.4 | 0.53 | 0.68913 | 2092.5 | 9.5  | 2106.4 | 6.8  | 2120.1 | 10 | 1.298  |
| Erin-RM/ | 162 | 191766.6  | 1.119 | 7.2 | 0.4 | 7.6  | 0.7 | 0.4 | 0.62 | 0.83858 | 2164.2 | 11.4 | 2186.6 | 6.6  | 2207.8 | 7  | 1.976  |
| Erin-RM/ | 126 | 67714.5   | 2.248 | 7.0 | 0.5 | 8.1  | 0.7 | 0.4 | 0.54 | 0.75385 | 2228.8 | 10.2 | 2241.7 | 6.5  | 2253.5 | 8  | 1.094  |
| Erin-RM/ | 102 | 125968.4  | 1.282 | 7.3 | 0.5 | 7.4  | 0.9 | 0.4 | 0.75 | 0.83055 | 2154.4 | 13.7 | 2164.8 | 8.0  | 2174.7 | 9  | 0.934  |
| Erin-RM/ | 211 | 146230.5  | 2.358 | 5.4 | 0.3 | 13.2 | 0.6 | 0.5 | 0.47 | 0.81433 | 2679.9 | 10.3 | 2691.7 | 5.4  | 2700.6 | 6  | 0.768  |
| Erin-RM/ | 205 | 1405394.0 | 2.246 | 5.3 | 0.4 | 13.5 | 0.7 | 0.5 | 0.58 | 0.84832 | 2719.6 | 12.9 | 2715.6 | 6.5  | 2712.6 | 6  | -0.258 |
| Erin-RM/ | 108 | 37069.9   | 1.808 | 8.5 | 0.6 | 5.4  | 0.9 | 0.3 | 0.63 | 0.69738 | 1877.0 | 10.2 | 1892.1 | 7.7  | 1908.8 | 12 | 1.665  |



|                               |     |          |          |     |     |      |     |     |      |         |        |      |        |      |        |    |        |
|-------------------------------|-----|----------|----------|-----|-----|------|-----|-----|------|---------|--------|------|--------|------|--------|----|--------|
| Erin-RM/                      | 134 | 49109.2  | 3.241    | 6.4 | 0.5 | 9.3  | 0.7 | 0.4 | 0.52 | 0.71888 | 2346.9 | 10.2 | 2368.6 | 6.6  | 2387.4 | 9  | 1.698  |
| Erin-RM/                      | 116 | 49315.9  | 0.729    | 7.6 | 0.5 | 6.9  | 0.8 | 0.4 | 0.58 | 0.72847 | 2097.2 | 10.3 | 2100.5 | 7.0  | 2103.7 | 10 | 0.31   |
| Erin-RM/                      | 75  | 30519.1  | 1.288    | 6.1 | 0.5 | 10.4 | 0.9 | 0.5 | 0.76 | 0.81671 | 2464.9 | 15.6 | 2471.5 | 8.6  | 2477.0 | 9  | 0.491  |
| Erin-RM/                      | 64  | 21825.8  | 3.125    | 7.5 | 0.6 | 7.0  | 0.9 | 0.4 | 0.65 | 0.73481 | 2090.4 | 11.7 | 2109.8 | 7.9  | 2128.7 | 11 | 1.801  |
| Erin-RM/                      | 179 | 134746.3 | 0.793    | 5.3 | 0.5 | 13.5 | 0.7 | 0.5 | 0.51 | 0.74750 | 2712.4 | 11.3 | 2718.6 | 6.4  | 2723.2 | 7  | 0.397  |
| Erin-RM/                      | 177 | 262558.8 | 2.043    | 8.5 | 0.5 | 5.5  | 0.9 | 0.3 | 0.73 | 0.81889 | 1911.1 | 12.1 | 1906.9 | 7.7  | 1902.2 | 9  | -0.47  |
| Erin-RM/                      | 302 | 98977.8  | 2.364    | 5.7 | 0.5 | 11.6 | 0.8 | 0.5 | 0.59 | 0.77088 | 2554.2 | 12.4 | 2576.2 | 7.1  | 2593.5 | 8  | 1.515  |
| Erin-RM/                      | 120 | 135405.0 | 1.388    | 4.9 | 0.5 | 15.4 | 0.7 | 0.5 | 0.54 | 0.76014 | 2809.3 | 12.3 | 2837.2 | 6.8  | 2857.1 | 7  | 1.67   |
| Erin-RM/                      | 104 | 131360.5 | 1.783    | 6.7 | 0.4 | 8.8  | 0.8 | 0.4 | 0.72 | 0.86403 | 2312.5 | 14.1 | 2314.7 | 7.6  | 2316.7 | 7  | 0.179  |
| Erin-RM/                      | 130 | 67875.0  | 1.904    | 7.1 | 0.5 | 7.9  | 0.8 | 0.4 | 0.60 | 0.76015 | 2228.9 | 11.3 | 2225.2 | 7.1  | 2221.8 | 9  | -0.323 |
| Erin-RM/                      | 212 | 76905.2  | 2.165    | 5.4 | 0.7 | 13.3 | 1.2 | 0.5 | 1.00 | 0.80138 | 2722.7 | 22.1 | 2704.4 | 11.8 | 2690.7 | 12 | -1.19  |
| Erin-RM/                      | 441 | 265827.3 | 3.734    | 7.5 | 0.4 | 7.1  | 0.7 | 0.4 | 0.56 | 0.84266 | 2129.1 | 10.1 | 2128.8 | 5.9  | 2128.5 | 6  | -0.025 |
| Erin-RM/                      | 73  | 20638.7  | 1.481    | 7.3 | 0.5 | 7.6  | 1.0 | 0.4 | 0.85 | 0.86613 | 2200.7 | 15.9 | 2186.8 | 8.8  | 2173.8 | 9  | -1.24  |
| Erin-RM/                      | 82  | 606986.7 | 3.997    | 7.6 | 0.5 | 7.0  | 0.8 | 0.4 | 0.69 | 0.83459 | 2110.9 | 12.4 | 2109.0 | 7.3  | 2107.1 | 8  | -0.18  |
| Erin-RM/                      | 101 | 153895.9 | 1.075    | 8.1 | 0.5 | 5.9  | 0.9 | 0.4 | 0.69 | 0.80393 | 1945.9 | 11.6 | 1966.1 | 7.5  | 1987.4 | 9  | 2.09   |
| Erin-RM/                      | 118 | 173663.7 | 3.261    | 7.5 | 0.5 | 7.2  | 0.8 | 0.4 | 0.57 | 0.72442 | 2155.4 | 10.4 | 2138.9 | 7.0  | 2123.1 | 9  | -1.52  |
| Erin-RM/                      | 117 | 198937.9 | 2.492    | 7.5 | 0.6 | 7.2  | 0.9 | 0.4 | 0.65 | 0.74817 | 2128.5 | 11.8 | 2132.3 | 7.8  | 2136.1 | 10 | 0.354  |
| Erin-RM/                      | 109 | 98940.1  | 1.429    | 7.4 | 0.5 | 7.2  | 0.8 | 0.4 | 0.58 | 0.72989 | 2135.5 | 10.5 | 2137.6 | 7.1  | 2139.6 | 9  | 0.191  |
| Erin-RM/                      | 128 | 51499.8  | 2.724    | 7.2 | 0.4 | 7.8  | 0.7 | 0.4 | 0.52 | 0.77985 | 2235.9 | 9.8  | 2213.0 | 6.0  | 2191.9 | 7  | -2.007 |
| Erin-RM/                      | 84  | 127883.1 | 1.982    | 7.3 | 0.6 | 7.4  | 0.9 | 0.4 | 0.66 | 0.73499 | 2151.5 | 12.1 | 2160.9 | 8.1  | 2169.7 | 11 | 0.84   |
| Erin-RM/                      | 238 | 143442.0 | 2.233    | 5.3 | 0.4 | 13.3 | 0.8 | 0.5 | 0.65 | 0.85751 | 2702.3 | 14.4 | 2701.0 | 7.2  | 2700.1 | 6  | -0.082 |
| Erin-RM/                      | 52  | 20266.8  | 0.419    | 7.4 | 0.5 | 7.2  | 0.8 | 0.4 | 0.62 | 0.75620 | 2131.2 | 11.2 | 2137.9 | 7.3  | 2144.4 | 9  | 0.615  |
| Erin-RM/                      | 187 | 195256.8 | 2.760    | 7.5 | 0.4 | 7.0  | 0.8 | 0.4 | 0.65 | 0.84540 | 2104.7 | 11.6 | 2113.3 | 6.8  | 2121.6 | 7  | 0.796  |
| Erin-RM/                      | 160 | 206741.3 | 1.698    | 7.3 | 0.4 | 7.6  | 0.8 | 0.4 | 0.66 | 0.83537 | 2199.4 | 12.4 | 2182.2 | 7.1  | 2166.1 | 8  | -1.538 |
| Erin-RM/                      | 122 | 54412.8  | 2.094    | 3.6 | 0.4 | 24.9 | 0.7 | 0.7 | 0.55 | 0.79866 | 3288.4 | 14.1 | 3303.2 | 6.7  | 3312.2 | 6  | 0.717  |
| Erin-RM/                      | 148 | 171026.8 | 1.268    | 5.0 | 0.4 | 14.9 | 0.6 | 0.5 | 0.50 | 0.79254 | 2804.4 | 11.5 | 2811.6 | 6.1  | 2816.8 | 6  | 0.441  |
| Erin-RM/                      | 164 | 48523.9  | 2.352    | 5.3 | 0.4 | 13.3 | 0.7 | 0.5 | 0.64 | 0.87026 | 2706.4 | 14.1 | 2701.1 | 6.9  | 2697.0 | 6  | -0.348 |
| Erin-RM/                      | 87  | 53161.4  | 1.307    | 7.6 | 0.6 | 6.9  | 0.8 | 0.4 | 0.56 | 0.67447 | 2110.5 | 10.1 | 2102.2 | 7.4  | 2094.1 | 11 | -0.783 |
| Erin-RM/                      | 142 | 208044.3 | 1.325    | 6.9 | 0.5 | 8.4  | 0.8 | 0.4 | 0.53 | 0.70852 | 2271.5 | 10.2 | 2271.5 | 6.8  | 2271.5 | 9  | 0.002  |
| Erin-RM/                      | 182 | 107996.8 | 2.180    | 7.1 | 0.4 | 7.7  | 0.8 | 0.4 | 0.62 | 0.81949 | 2184.5 | 11.6 | 2198.2 | 6.8  | 2210.9 | 8  | 1.193  |
| Erin-RM/                      | 95  | 37688.7  | 1.365    | 5.6 | 0.4 | 11.9 | 0.8 | 0.5 | 0.69 | 0.85091 | 2567.7 | 14.6 | 2599.8 | 7.6  | 2624.9 | 7  | 2.179  |
| Erin-RM/                      | 191 | 73796.4  | 1.388    | 7.6 | 0.5 | 6.9  | 0.9 | 0.4 | 0.76 | 0.84915 | 2100.0 | 13.6 | 2102.7 | 7.9  | 2105.2 | 8  | 0.244  |
| Erin-RM/                      | 109 | 30881.7  | 2.167    | 7.4 | 0.4 | 7.3  | 0.9 | 0.4 | 0.75 | 0.86600 | 2157.4 | 13.8 | 2144.2 | 7.8  | 2131.6 | 8  | -1.214 |
| Erin-RM/                      | 103 | 182263.4 | 2.049    | 7.0 | 0.6 | 8.0  | 0.9 | 0.4 | 0.66 | 0.72550 | 2223.5 | 12.3 | 2233.5 | 8.2  | 2242.7 | 11 | 0.856  |
| Erin-RM/                      | 170 | 123121.4 | 1.535    | 4.6 | 0.5 | 16.9 | 0.8 | 0.6 | 0.63 | 0.76957 | 2921.3 | 14.9 | 2931.7 | 7.9  | 2938.9 | 8  | 0.601  |
| Erin-RM/                      | 93  | 80430.1  | 4.187    | 7.2 | 0.6 | 7.6  | 1.0 | 0.4 | 0.75 | 0.78658 | 2174.8 | 13.9 | 2187.9 | 8.6  | 2200.2 | 10 | 1.156  |
| Erin-RM/                      | 235 | 83618.3  | 3.478    | 7.5 | 0.5 | 7.0  | 0.9 | 0.4 | 0.70 | 0.80802 | 2102.0 | 12.6 | 2107.4 | 7.7  | 2112.7 | 9  | 0.506  |
| Erin-RM/                      | 49  | 16724.8  | 1.726    | 6.9 | 0.6 | 8.6  | 0.8 | 0.4 | 0.59 | 0.70627 | 2331.4 | 11.6 | 2297.6 | 7.7  | 2267.7 | 10 | -2.81  |
| Erin-RM/                      | 328 | 813086.5 | 3.135    | 7.0 | 0.5 | 7.9  | 1.0 | 0.4 | 0.90 | 0.87263 | 2203.3 | 16.9 | 2223.2 | 9.3  | 2241.6 | 9  | 1.709  |
| Erin-RM/                      | 192 | 229631.2 | 1.234    | 4.9 | 0.4 | 15.1 | 0.7 | 0.5 | 0.57 | 0.78841 | 2800.0 | 12.9 | 2821.2 | 6.9  | 2836.3 | 7  | 1.28   |
| Run 1 (discordant Sept. 2022) |     |          |          |     |     |      |     |     |      |         |        |      |        |      |        |    |        |
| Erin-RM/                      | 0   | 1500.0   | 1777.239 | 5.1 | 1.0 | 36.1 | 1.2 | 1.3 | 0.60 | 0.51448 | 5473.5 | 22.1 | 3668.2 | 11.5 | 2789.4 | 16 | -96.22 |
