# Supplementary material for: Increased accuracy and precision in igneous and detrital zircon geochronology using CA-LA-ICPMS
Source: Copernicus journal article supplement (doi:10.5194/gchron-2023-20), 2023-08-25
Supplement: Supplementary file 24 [file gchron-2023-20-supplement.zip]

**TABLE S14: MIGU-02 LA-ICPMS U-Pb ZIRCON GEOCHRONOLOGY**

| <u>Composition</u>                 |       |        |       |         |            |        |            |         |            | <u>Ages</u> |         |            |         |            |         |            |        |
|------------------------------------|-------|--------|-------|---------|------------|--------|------------|---------|------------|-------------|---------|------------|---------|------------|---------|------------|--------|
| Zircon                             | U     | 206Pb/ | U/Th  | 206Pb/  | 1 $\sigma$ | 207Pb/ | 1 $\sigma$ | 206Pb/  | 1 $\sigma$ | error       | 206Pb/  | 1 $\sigma$ | 207Pb/  | 1 $\sigma$ | 206Pb/  | 1 $\sigma$ | %      |
| #                                  | (ppm) | 204Pb  |       | 207Pb   | (%)        | 235U   | (%)        | 238U    | (%)        | corr.       | 238U    | (Ma)       | 235U    | (Ma)       | 207Pb   | (Ma)       | Disc.  |
| <b>MIGU-02 (no CA)</b>             |       |        |       |         |            |        |            |         |            |             |         |            |         |            |         |            |        |
| 1                                  | 5026  | 1094   | 2.629 | 11.7341 | 1.87       | 2.3017 | 1.99       | 0.19597 | 0.67       | 0.338       | 1153.62 | 7.1        | 1212.81 | 14.1       | 1319.72 | 36.3       | 12.6   |
| 31                                 | 2682  | 1309   | 2.575 | 10.5165 | 0.74       | 3.0369 | 2.37       | 0.23174 | 2.26       | 0.951       | 1343.59 | 27.4       | 1416.95 | 18.1       | 1528.99 | 13.8       | 12.1   |
| 34                                 | 1803  | 4583   | 2.535 | 11.5954 | 0.54       | 2.2007 | 2.63       | 0.18515 | 2.58       | 0.979       | 1095.08 | 25.9       | 1181.27 | 18.4       | 1342.74 | 10.3       | 18.4   |
| 35                                 | 1513  | 22136  | 4.478 | 12.2946 | 0.64       | 2.3127 | 1.46       | 0.20631 | 1.31       | 0.899       | 1209.14 | 14.5       | 1216.19 | 10.4       | 1228.74 | 12.5       | 1.6    |
| <b>MIGU-02 (no CA; discordant)</b> |       |        |       |         |            |        |            |         |            |             |         |            |         |            |         |            |        |
| 2                                  | 394   | 22935  | 0.070 | 17.3008 | 1.74       | 1.8437 | 2.19       | 0.23145 | 1.32       | 0.605       | 1342.09 | 16.0       | 1061.20 | 14.4       | 521.24  | 38.2       | -157.5 |
| 3                                  | 3673  | 58723  | 1.643 | 13.4834 | 0.81       | 2.4249 | 1.14       | 0.23723 | 0.81       | 0.707       | 1372.29 | 10.0       | 1250.00 | 8.2        | 1045.11 | 16.3       | -31.3  |
| 4                                  | 1558  | 5660   | 3.817 | 12.2240 | 0.41       | 3.4997 | 0.86       | 0.31041 | 0.76       | 0.880       | 1742.72 | 11.6       | 1527.15 | 6.8        | 1240.03 | 8.0        | -40.5  |
| 5                                  | 147   | 282    | 1.750 | 4.1808  | 0.42       | #####  | 0.80       | 0.53639 | 0.69       | 0.852       | 2768.34 | 15.4       | 2972.60 | 7.7        | 3113.86 | 6.7        | 11.1   |
| 6                                  | 1367  | 1680   | 1.851 | 8.3907  | 3.81       | 2.8259 | 4.21       | 0.17205 | 1.80       | 0.426       | 1023.37 | 17.0       | 1362.44 | 31.6       | 1943.16 | 68.2       | 47.3   |
| 7                                  | 13    | 145    | 5.997 | 2.2799  | 6.42       | #####  | 30.68      | 0.49654 | 30.00      | 0.978       | 2598.92 | 643.9      | 3487.32 | 310.9      | 4046.37 | 95.9       | 35.8   |
| 9                                  | 4962  | 34309  | 2.715 | 14.2840 | 0.65       | 2.3215 | 0.96       | 0.24061 | 0.71       | 0.740       | 1389.86 | 8.9        | 1218.89 | 6.8        | 927.70  | 13.3       | -49.8  |
| 13                                 | 3880  | 5958   | 2.550 | 12.9919 | 0.67       | 2.4782 | 1.22       | 0.23361 | 1.03       | 0.840       | 1353.40 | 12.6       | 1265.68 | 8.9        | 1119.56 | 13.3       | -20.9  |
| 16                                 | 934   | 28355  | 1.929 | 11.8550 | 1.23       | 2.8761 | 1.98       | 0.24739 | 1.55       | 0.784       | 1425.01 | 19.9       | 1375.66 | 14.9       | 1299.84 | 23.9       | -9.6   |
| 17                                 | 1484  | 32116  | 2.183 | 12.1590 | 0.62       | 2.6553 | 1.14       | 0.23426 | 0.96       | 0.839       | 1356.77 | 11.7       | 1316.11 | 8.4        | 1250.45 | 12.2       | -8.5   |
| 21                                 | 183   | 2002   | 2.725 | 8.4673  | 2.83       | 4.0953 | 3.47       | 0.25161 | 2.00       | 0.578       | 1446.76 | 25.9       | 1653.38 | 28.3       | 1926.90 | 50.7       | 24.9   |
| 22                                 | 1546  | 507    | 4.090 | 8.0805  | 3.48       | 6.6782 | 3.81       | 0.39155 | 1.57       | 0.411       | 2129.99 | 28.5       | 2069.74 | 33.7       | 2010.27 | 61.7       | -6.0   |
| 27                                 | 4264  | 45082  | 2.647 | 13.8392 | 0.38       | 2.4755 | 0.69       | 0.24858 | 0.58       | 0.832       | 1431.13 | 7.4        | 1264.89 | 5.0        | 992.36  | 7.8        | -44.2  |
| 30                                 | 3275  | 12827  | 1.085 | 14.9929 | 2.30       | 2.0891 | 30.09      | 0.22726 | 30.00      | 0.997       | 1320.14 | 358.5      | 1145.22 | 209.5      | 827.46  | 48.0       | -59.5  |
| 32                                 | 1046  | 48293  | 3.510 | 11.9403 | 0.54       | 2.7520 | 1.54       | 0.23842 | 1.44       | 0.936       | 1378.48 | 17.9       | 1342.62 | 11.5       | 1285.89 | 10.5       | -7.2   |
| 33                                 | 3869  | 3922   | 2.048 | 12.5164 | 0.43       | 2.4919 | 1.28       | 0.22630 | 1.20       | 0.941       | 1315.10 | 14.3       | 1269.67 | 9.2        | 1193.52 | 8.5        | -10.2  |

| <u>Composition</u>  |       |        |       |         |            |        |            |         |            | <u>Ages</u> |         |            |         |            |         |            |       |
|---------------------|-------|--------|-------|---------|------------|--------|------------|---------|------------|-------------|---------|------------|---------|------------|---------|------------|-------|
| Zircon              | U     | 206Pb/ | U/Th  | 206Pb/  | 1 $\sigma$ | 207Pb/ | 1 $\sigma$ | 206Pb/  | 1 $\sigma$ | error       | 206Pb/  | 1 $\sigma$ | 207Pb/  | 1 $\sigma$ | 206Pb/  | 1 $\sigma$ | %     |
| #                   | (ppm) | 204Pb  |       | 207Pb   | (%)        | 235U   | (%)        | 238U    | (%)        | corr.       | 238U    | (Ma)       | 235U    | (Ma)       | 207Pb   | (Ma)       | Disc. |
| <b>MIGU-02 (CA)</b> |       |        |       |         |            |        |            |         |            |             |         |            |         |            |         |            |       |
| 3                   | 90    | 7494   | 1.723 | 10.0138 | 1.49       | 3.3795 | 1.68       | 0.24555 | 0.77       | 0.458       | 1415.48 | 9.8        | 1499.65 | 13.2       | 1620.70 | 27.8       | 12.7  |
| 5                   | 201   | 3568   | 1.706 | 10.2832 | 1.61       | 3.3975 | 1.79       | 0.25349 | 0.79       | 0.438       | 1456.47 | 10.2       | 1503.81 | 14.1       | 1571.14 | 30.2       | 7.3   |
| 10                  | 338   | #####  | 2.238 | 11.2566 | 0.47       | 2.9040 | 1.07       | 0.23719 | 0.96       | 0.897       | 1372.05 | 11.8       | 1382.95 | 8.0        | 1399.80 | 9.0        | 2.0   |
| 11                  | 174   | 14327  | 1.938 | 11.3963 | 0.48       | 2.9698 | 0.79       | 0.24557 | 0.63       | 0.793       | 1415.61 | 8.0        | 1399.93 | 6.0        | 1376.11 | 9.3        | -2.9  |
| 12                  | 102   | 8938   | 1.814 | 11.4825 | 0.50       | 2.9059 | 0.81       | 0.24210 | 0.65       | 0.792       | 1397.63 | 8.1        | 1383.44 | 6.2        | 1361.61 | 9.6        | -2.6  |
| 13                  | 235   | 14657  | 2.025 | 10.9684 | 0.82       | 2.9725 | 1.17       | 0.23657 | 0.83       | 0.715       | 1368.82 | 10.3       | 1400.61 | 8.9        | 1449.33 | 15.5       | 5.6   |
| 14                  | 226   | 49026  | 1.772 | 11.3576 | 0.55       | 2.9242 | 1.02       | 0.24098 | 0.86       | 0.840       | 1391.78 | 10.7       | 1388.19 | 7.7        | 1382.65 | 10.6       | -0.7  |
| 17                  | 118   | 24813  | 1.714 | 11.2401 | 0.64       | 2.9948 | 0.90       | 0.24425 | 0.63       | 0.697       | 1408.74 | 7.9        | 1406.31 | 6.8        | 1402.60 | 12.4       | -0.4  |
| 20                  | 389   | 32593  | 1.905 | 11.2313 | 0.53       | 2.9695 | 0.87       | 0.24200 | 0.69       | 0.791       | 1397.07 | 8.6        | 1399.86 | 6.6        | 1404.10 | 10.1       | 0.5   |
| 21                  | 96    | 6512   | 0.590 | 8.7457  | 0.70       | 5.1773 | 1.02       | 0.32853 | 0.75       | 0.730       | 1831.27 | 11.9       | 1848.89 | 8.7        | 1868.75 | 12.6       | 2.0   |
| 22                  | 125   | 7651   | 1.599 | 9.3358  | 3.06       | 3.7067 | 3.24       | 0.25109 | 1.06       | 0.328       | 1444.11 | 13.8       | 1572.83 | 25.9       | 1750.07 | 56.0       | 17.5  |
| 24                  | 253   | 27258  | 2.143 | 11.2516 | 0.56       | 2.9035 | 0.78       | 0.23704 | 0.54       | 0.692       | 1371.29 | 6.7        | 1382.82 | 5.9        | 1400.63 | 10.8       | 2.1   |

|    |     |        |       |         |      |        |      |         |      |       |         |      |         |     |         |      |      |
|----|-----|--------|-------|---------|------|--------|------|---------|------|-------|---------|------|---------|-----|---------|------|------|
| 25 | 199 | 39357  | 2.061 | 11.2520 | 0.38 | 2.9100 | 0.66 | 0.23758 | 0.54 | 0.821 | 1374.09 | 6.7  | 1384.50 | 5.0 | 1400.57 | 7.3  | 1.9  |
| 26 | 217 | 33349  | 2.381 | 11.3220 | 0.50 | 2.9271 | 0.94 | 0.24047 | 0.80 | 0.845 | 1389.13 | 10.0 | 1388.96 | 7.1 | 1388.67 | 9.7  | 0.0  |
| 27 | 114 | 66420  | 1.587 | 11.3545 | 0.66 | 2.9051 | 1.06 | 0.23934 | 0.83 | 0.780 | 1383.25 | 10.3 | 1383.23 | 8.0 | 1383.18 | 12.7 | 0.0  |
| 28 | 169 | 30670  | 1.927 | 11.4033 | 0.59 | 2.8829 | 1.26 | 0.23854 | 1.11 | 0.883 | 1379.09 | 13.8 | 1377.46 | 9.5 | 1374.93 | 11.4 | -0.3 |
| 29 | 111 | 12960  | 1.960 | 11.4618 | 0.53 | 2.9649 | 0.83 | 0.24658 | 0.63 | 0.766 | 1420.81 | 8.1  | 1398.68 | 6.3 | 1365.08 | 10.2 | -4.1 |
| 30 | 168 | 24999  | 1.314 | 11.2087 | 0.54 | 2.9699 | 0.83 | 0.24154 | 0.62 | 0.755 | 1394.68 | 7.8  | 1399.95 | 6.3 | 1407.97 | 10.4 | 0.9  |
| 31 | 359 | 63281  | 2.031 | 11.1582 | 0.52 | 2.9571 | 0.86 | 0.23942 | 0.69 | 0.798 | 1383.66 | 8.6  | 1396.68 | 6.6 | 1416.60 | 10.0 | 2.3  |
| 32 | 250 | 47360  | 1.110 | 11.1355 | 0.79 | 2.9721 | 0.95 | 0.24014 | 0.52 | 0.547 | 1387.42 | 6.5  | 1400.52 | 7.2 | 1420.49 | 15.2 | 2.3  |
| 33 | 394 | 38476  | 1.704 | 11.2203 | 0.44 | 2.9475 | 0.72 | 0.23997 | 0.57 | 0.789 | 1386.52 | 7.1  | 1394.21 | 5.5 | 1405.97 | 8.5  | 1.4  |
| 34 | 201 | 426380 | 1.499 | 11.1868 | 0.57 | 2.9356 | 0.79 | 0.23828 | 0.54 | 0.692 | 1377.75 | 6.8  | 1391.13 | 6.0 | 1411.70 | 10.9 | 2.4  |
| 35 | 121 | 19858  | 1.458 | 11.3101 | 0.54 | 2.9198 | 0.83 | 0.23961 | 0.63 | 0.759 | 1384.66 | 7.9  | 1387.05 | 6.3 | 1390.70 | 10.4 | 0.4  |

**MIGU-02 (CA; hit epoxy)**

[illegible]
