# Supplementary material for: Increased accuracy and precision in igneous and detrital zircon geochronology using CA-LA-ICPMS
Source: Copernicus journal article supplement (doi:10.5194/gchron-2023-20), 2023-08-25
Supplement: Supplementary file 25 [file gchron-2023-20-supplement.zip]

TABLE S6: R33 LA-ICPMS U-Pb ZIRCON GEOCHRONOLOGY

| Composition     |         |             |      |             |        |            |        |            |        | Ages        |            |         |            |         |             |         |         |
|-----------------|---------|-------------|------|-------------|--------|------------|--------|------------|--------|-------------|------------|---------|------------|---------|-------------|---------|---------|
| Zircon #        | U (ppm) | 206Pb/204Pb | U/Th | 206Pb/207Pb | 2σ (%) | 207Pb/235U | 2σ (%) | 206Pb/238U | 2σ (%) | Error Corr. | 206Pb/238U | 2σ (Ma) | 207Pb/235U | 2σ (Ma) | 206Pb/207Pb | 2σ (Ma) | % Disc. |
| R33 no CA Run 1 |         |             |      |             |        |            |        |            |        |             |            |         |            |         |             |         |         |
| R33-1           | 111     | 34248       | 1.54 | 18.621      | 5.6    | 0.5081     | 15.7   | 0.06864    | 14.7   | 0.934       | 428.0      | 60.8    | 417.1      | 53.8    | 357.6       | 126.3   | -19.7   |
| R33-10          | 242     | 6686        | 1.64 | 17.950      | 3.1    | 0.5099     | 4.3    | 0.06641    | 3.0    | 0.693       | 414.5      | 11.9    | 418.4      | 14.6    | 439.9       | 68.3    | 5.8     |
| R33-11          | 552     | 13907       | 1.47 | 18.333      | 2.0    | 0.4942     | 3.5    | 0.06574    | 2.8    | 0.816       | 410.5      | 11.3    | 407.8      | 11.7    | 392.7       | 45.2    | -4.5    |
| R33-12          | 101     | 12207       | 1.61 | 17.336      | 6.1    | 0.5192     | 7.3    | 0.06531    | 4.0    | 0.547       | 407.8      | 15.7    | 424.6      | 25.2    | 516.8       | 133.4   | 21.1    |
| R33-13          | 79      | 5544        | 2.02 | 17.046      | 6.6    | 0.5294     | 8.8    | 0.06548    | 5.7    | 0.655       | 408.9      | 22.7    | 431.4      | 30.8    | 553.7       | 144.3   | 26.2    |
| R33-14          | 114     | 5476        | 1.73 | 17.498      | 5.3    | 0.5099     | 6.0    | 0.06474    | 2.8    | 0.463       | 404.4      | 10.8    | 418.4      | 20.5    | 496.4       | 116.8   | 18.5    |
| R33-15          | 220     | 4403        | 1.08 | 18.132      | 4.8    | 0.5058     | 5.9    | 0.06655    | 3.4    | 0.570       | 415.3      | 13.5    | 415.6      | 20.1    | 417.3       | 107.9   | 0.5     |
| R33-2           | 172     | 9048        | 1.67 | 19.038      | 4.1    | 0.4818     | 5.3    | 0.06655    | 3.3    | 0.627       | 415.3      | 13.3    | 399.3      | 17.4    | 307.3       | 93.6    | -35.1   |
| R33-3           | 678     | 16589       | 1.57 | 18.140      | 2.5    | 0.5029     | 4.3    | 0.06619    | 3.4    | 0.805       | 413.2      | 13.8    | 413.6      | 14.6    | 416.4       | 56.8    | 0.8     |
| R33-4           | 163     | 5856        | 1.65 | 18.608      | 3.4    | 0.5175     | 4.6    | 0.06988    | 3.0    | 0.670       | 435.4      | 12.8    | 423.5      | 15.8    | 359.2       | 76.2    | -21.2   |
| R33-6           | 281     | 13597       | 1.56 | 18.723      | 3.2    | 0.5257     | 5.0    | 0.07141    | 3.9    | 0.779       | 444.6      | 16.9    | 428.9      | 17.6    | 345.3       | 71.6    | -28.8   |
| R33-7           | 1789    | #####       | 1.32 | 17.861      | 1.7    | 0.5198     | 2.8    | 0.06737    | 2.2    | 0.782       | 420.3      | 8.9     | 425.0      | 9.7     | 451.0       | 38.7    | 6.8     |
| R33-8           | 148     | 10891       | 1.34 | 18.222      | 3.1    | 0.5098     | 4.7    | 0.06741    | 3.5    | 0.749       | 420.5      | 14.3    | 418.3      | 16.1    | 406.2       | 69.4    | -3.5    |
| R33-9           | 269     | 12352       | 1.57 | 18.364      | 3.0    | 0.5003     | 4.7    | 0.06666    | 3.5    | 0.760       | 416.0      | 14.3    | 411.9      | 15.8    | 388.8       | 68.2    | -7.0    |
| R33 no CA Run 2 |         |             |      |             |        |            |        |            |        |             |            |         |            |         |             |         |         |
| R33 1           | 296     | 7E+05       | 1.1  | 18.348      | 2.8    | 0.5049     | 3.7    | 0.06722    | 2.4    | 0.656       | 419.4      | 9.9     | 415        | 12.7    | 390.8       | 63.1    | -7.3    |
| R33 10          | 225     | 86117       | 0.85 | 18.252      | 2.6    | 0.5206     | 4.2    | 0.06895    | 3.3    | 0.79        | 429.8      | 13.7    | 425.6      | 14.5    | 402.6       | 57.2    | -6.8    |
| R33 11          | 72      | 56454       | 1.5  | 17.775      | 3.7    | 0.5122     | 5.3    | 0.06606    | 3.8    | 0.717       | 412.4      | 15.1    | 419.9      | 18.1    | 461.5       | 81.2    | 10.6    |
| R33 12          | 147     | 28252       | 1.38 | 18.416      | 3.7    | 0.5006     | 4.4    | 0.06689    | 2.4    | 0.545       | 417.4      | 9.7     | 412.1      | 14.9    | 382.5       | 82.9    | -9.1    |
| R33 13          | 236     | 2E+05       | 1.66 | 18.118      | 2.8    | 0.5187     | 3.7    | 0.06819    | 2.5    | 0.667       | 425.2      | 10.2    | 424.3      | 12.9    | 419.1       | 62      | -1.5    |
| R33 14          | 154     | 2E+05       | 1.36 | 18.83       | 2.9    | 0.5037     | 4.2    | 0.06882    | 3      | 0.714       | 429        | 12.4    | 414.2      | 14.2    | 332.3       | 66.5    | -29.1   |
| R33 15          | 117     | 22168       | 1.38 | 18.207      | 3.2    | 0.5144     | 4.5    | 0.06796    | 3.2    | 0.712       | 423.9      | 13.2    | 421.4      | 15.7    | 408.1       | 71.3    | -3.9    |
| R33 16          | 117     | 22031       | 0.87 | 17.015      | 4.8    | 0.5637     | 6.5    | 0.06959    | 4.3    | 0.662       | 433.7      | 17.9    | 453.9      | 23.6    | 557.7       | 105.6   | 22.2    |
| R33 17          | 196     | 73853       | 1.62 | 18.092      | 2.7    | 0.5173     | 3.4    | 0.06791    | 2      | 0.603       | 423.5      | 8.3     | 423.3      | 11.6    | 422.2       | 59.7    | -0.3    |
| R33 18          | 101     | 20741       | 1.36 | 18.266      | 3.5    | 0.4946     | 5      | 0.06555    | 3.6    | 0.721       | 409.3      | 14.3    | 408        | 16.8    | 400.8       | 77.4    | -2.1    |
| R33 19          | 107     | 2E+05       | 1.61 | 17.832      | 3.7    | 0.519      | 4.8    | 0.06716    | 3.1    | 0.645       | 419        | 12.6    | 424.5      | 16.6    | 454.5       | 81.4    | 7.8     |
| R33 2           | 153     | 55363       | 2.63 | 18.383      | 2.8    | 0.4946     | 4.1    | 0.06597    | 3.1    | 0.738       | 411.8      | 12.2    | 408        | 13.9    | 386.5       | 62.8    | -6.5    |
| R33 20          | 96      | 1E+06       | 1.89 | 17.879      | 2.9    | 0.5151     | 4.1    | 0.06683    | 3      | 0.721       | 417        | 12.1    | 421.9      | 14.3    | 448.6       | 63.8    | 7.0     |
| R33 21          | 288     | 7E+05       | 1.1  | 18.052      | 2.6    | 0.5026     | 3.9    | 0.06583    | 2.9    | 0.747       | 411        | 11.7    | 413.4      | 13.4    | 427.2       | 58.3    | 3.8     |
| R33 22          | 214     | 63222       | 1.07 | 18.223      | 2.7    | 0.5208     | 4.1    | 0.06886    | 3.1    | 0.754       | 429.3      | 13      | 425.7      | 14.4    | 406.2       | 61      | -5.7    |
| R33 23          | 111     | 32367       | 1.52 | 18.251      | 3.1    | 0.496      | 4.2    | 0.06569    | 2.9    | 0.68        | 410.1      | 11.4    | 409        | 14.2    | 402.7       | 69.1    | -1.8    |
| R33 24          | 138     | 1E+06       | 1.42 | 18.325      | 2.9    | 0.5023     | 4.1    | 0.06679    | 3      | 0.723       | 416.8      | 12.1    | 413.2      | 14.1    | 393.6       | 64.2    | -5.9    |
| R33 25          | 457     | 9E+05       | 1.7  | 18.253      | 2.5    | 0.515      | 3.7    | 0.06821    | 2.7    | 0.739       | 425.3      | 11.1    | 421.8      | 12.6    | 402.4       | 55.2    | -5.7    |
| R33 26          | 503     | 3E+05       | 1.53 | 17.988      | 2.2    | 0.5105     | 3.5    | 0.06664    | 2.7    | 0.774       | 415.9      | 11.1    | 418.8      | 12.2    | 435.1       | 50      | 4.4     |
| R33 27          | 613     | 3E+05       | 1.42 | 18.089      | 2.2    | 0.5301     | 3      | 0.06958    | 2.1    | 0.689       | 433.6      | 8.7     | 431.9      | 10.6    | 422.6       | 48.9    | -2.6    |
| R33 28          | 68      | 5000        | 1.62 | 19.02       | 9.3    | 0.4871     | 10     | 0.06722    | 3.8    | 0.382       | 419.4      | 15.6    | 402.9      | 33.3    | 309.5       | 210.9   | -35.5   |
| R33 29          | 294     | 50470       | 1.66 | 18.175      | 2.6    | 0.5107     | 3.8    | 0.06735    | 2.8    | 0.737       | 420.2      | 11.5    | 418.9      | 13.1    | 412.1       | 57.8    | -2.0    |
| R33 3           | 201     | 2E+05       | 1.11 | 18.212      | 2.8    | 0.5093     | 3.9    | 0.0673     | 2.6    | 0.681       | 419.9      | 10.7    | 418        | 13.3    | 407.5       | 63.5    | -3.0    |
| R33 30          | 55      | 5000        | 2.16 | 19.572      | 10.4   | 0.4689     | 11.4   | 0.06659    | 4.6    | 0.401       | 415.6      | 18.4    | 390.4      | 36.9    | 244         | 240.7   | -70.3   |
| R33 4           | 132     | 2E+05       | 1.59 | 18.2        | 3.3    | 0.5122     | 5      | 0.06764    | 3.7    | 0.741       | 422        | 15      | 419.9      | 17.1    | 408.9       | 74.5    | -3.2    |
| R33 5           | 280     | 47163       | 2.51 | 17.934      | 2.4    | 0.5082     | 3.8    | 0.06613    | 3      | 0.776       | 412.8      | 11.9    | 417.2      | 13.1    | 441.8       | 53.7    | 6.6     |
| R33 6           | 79      | 67169       | 2.37 | 18.127      | 3.6    | 0.5048     | 4.7    | 0.06639    | 3.1    | 0.657       | 414.4      | 12.5    | 414.9      | 16.1    | 417.9       | 79.9    | 0.8     |
| R33 7           | 201     | 2E+05       | 1.72 | 18.105      | 2.6    | 0.5053     | 4.1    | 0.06638    | 3.2    | 0.783       | 414.3      | 13      | 415.3      | 14.1    | 420.7       | 57.5    | 1.5     |
| R33 8           | 184     | 2E+05       | 1.24 | 17.784      | 3      | 0.504      | 3.9    | 0.06503    | 2.5    | 0.643       | 406.2      | 9.8     | 414.4      | 13.2    | 460.5       | 65.9    | 11.8    |
| R33 9           | 355     | 1E+05       | 0.95 | 18.333      | 2.3    | 0.509      | 3.5    | 0.06771    | 2.6    | 0.74        | 422.3      | 10.5    | 417.8      | 11.9    | 392.7       | 52.5    | -7.5    |
| R33 CA Run 1    |         |             |      |             |        |            |        |            |        |             |            |         |            |         |             |         |         |
| R33-1           | 173     | 8053        | 1.33 | 18.230      | 5.2    | 0.5105     | 6.5    | 0.06753    | 3.9    | 0.598       | 421.2      | 15.8    | 418.8      | 22.2    | 405.3       | 116.1   | -3.9    |
| R33-2           | 441     | #####       | 1.58 | 17.777      | 3.8    | 0.5224     | 4.5    | 0.06739    | 2.5    | 0.544       | 420.4      | 10.0    | 426.8      | 15.7    | 461.4       | 83.8    | 8.9     |
| R33-3           | 202     | 7029        | 1.26 | 18.836      | 5.0    | 0.4870     | 5.9    | 0.06656    | 3.1    | 0.526       | 415.4      | 12.4    | 402.9      | 19.5    | 331.6       | 113.3   | -25.3   |
| R33-4           | 235     | 4692        | 1.45 | 20.020      | 6.0    | 0.4849     | 16.6   | 0.07043    | 15.5   | 0.933       | 438.8      | 65.8    | 401.4      | 55.2    | 191.7       | 139.5   | -128.9  |
| R33-5           | 180     | 15002       | 1.44 | 18.436      | 3.4    | 0.5054     | 4.5    | 0.06761    | 3.0    | 0.657       | 421.7      | 12.2    | 415.4      | 15.5    | 380.1       | 76.8    | -10.9   |
| R33-6           | 410     | 6938        | 1.86 | 18.680      | 3.0    | 0.4979     | 4.0    | 0.06748    | 2.6    | 0.658       | 421.0      | 10.6    | 410.3      | 13.4    | 350.5       | 67.7    | -20.1   |
| R33-7           | 243     | 15063       | 1.24 | 18.652      | 2.7    | 0.4983     | 3.8    | 0.06744    | 2.7    | 0.705       | 420.7      | 11.0    | 410.6      | 12.9    | 353.8       | 61.3    | -18.9   |
| R33-8           | 1317    | 36566       | 0.94 | 17.933      | 1.7    | 0.5052     | 4.0    | 0.06574    | 3.6    | 0.908       | 410.4      | 14.4    | 415.2      | 13.5    | 441.9       | 37.0    | 7.1     |
| R33-9           | 187     | #####       | 2.06 | 17.459      | 7.8    | 0.5458     | 12.5   | 0.06914    | 9.7    | 0.777       | 431.0      | 40.4    | 442.2      | 44.7    | 501.2       | 172.8   | 14.0    |
| R33-10          | 357     | 13328       | 2.59 | 18.585      | 2.6    | 0.4923     | 4.0    | 0.06638    | 3.0    | 0.749       | 414.3      | 12.0    | 406.4      | 13.4    | 362.0       | 59.6    | -14.4   |
| R33-11          | 96      | 6625        | 1.91 | 12.979      | 12.0   | 0.7197     | 15.7   | 0.06777    | 10.1   | 0.647       | 422.7      | 41.5    | 550.5      | 66.6    | 1121.6      | 238.6   | 62.3    |
| R33-12          | 187     | 5552        | 1.33 | 17.549      | 6.6    | 0.5338     | 7.6    | 0.06797    | 3.7    | 0.488       | 423.9      | 15.1    | 434.4      | 26.7    | 490.0       | 145.7   | 13.5    |
| R33-14          | 200     | 10606       | 1.27 | 18.387      | 3.6    | 0.4968     | 4.8    | 0.06628    | 3.1    | 0.658       | 413.7      | 12.6    | 409.5      | 16.1    | 386.1       | 80.6    | -7.1    |
| R33-13          | 185     | 7356        | 1.32 | 19.053      | 3.8    | 0.4715     | 5.3    | 0.06518    | 3.7    | 0.701       | 407.0      | 14.7    | 392.2      | 17.3    | 305.6       | 86.5    | -33.2   |
| R33-15          | 627     | #####       | 1.47 | 17.954      | 2.7    | 0.5189     | 4.3    | 0.06760    | 3.4    | 0.781       | 421.7      | 13.9    | 424.4      | 15.1    | 439.3       | 60.5    | 4.0     |
| R33 CA Run 2    |         |             |      |             |        |            |        |            |        |             |            |         |            |         |             |         |         |
| R33 1           | 425     | 3E+05       | 0.98 | 18.358      | 2.9    | 0.5046     | 3.7    | 0.06721    | 2.2    | 0.596       | 419.3      | 8.9     | 414.8      | 12.5    | 389.6       | 66.2    | -7.6    |
| R33 10          | 155     | 2E+05       | 2.23 | 18.14       | 3.9    | 0.5186     | 5      | 0.06826    | 3.1    | 0.618       | 425.7      | 12.7    | 424.2</    |         |             |         |         |

|                                  |     |       |      |        |     |        |     |         |     |       |        |      |        |      |        |      |       |
|----------------------------------|-----|-------|------|--------|-----|--------|-----|---------|-----|-------|--------|------|--------|------|--------|------|-------|
| R33 21                           | 174 | 1E+05 | 1.81 | 17.994 | 4.1 | 0.5157 | 5   | 0.06733 | 2.9 | 0.572 | 420    | 11.7 | 422.2  | 17.3 | 434.4  | 91.7 | 3.3   |
| R33 22                           | 312 | 7E+05 | 1.42 | 18.037 | 2.9 | 0.5217 | 4   | 0.06828 | 2.8 | 0.685 | 425.8  | 11.4 | 426.3  | 14.1 | 429    | 65.6 | 0.7   |
| R33 23                           | 248 | 22594 | 1.26 | 18.414 | 3.7 | 0.5097 | 4.8 | 0.06809 | 3.1 | 0.648 | 424.7  | 12.8 | 418.2  | 16.5 | 382.8  | 82.3 | -10.9 |
| R33 24                           | 152 | 33205 | 1.71 | 18.595 | 4   | 0.5014 | 4.9 | 0.06765 | 2.9 | 0.595 | 422    | 12   | 412.6  | 16.7 | 360.7  | 89.4 | -17.0 |
| R33 25                           | 384 | 53527 | 1.28 | 18.34  | 2.8 | 0.5116 | 3.5 | 0.06808 | 2.1 | 0.59  | 424.6  | 8.5  | 419.5  | 12.1 | 391.7  | 63.6 | -8.4  |
| R33 26                           | 375 | 75011 | 1.3  | 18.1   | 2.7 | 0.522  | 4   | 0.06855 | 2.9 | 0.741 | 427.4  | 12.1 | 426.5  | 13.8 | 421.3  | 59.2 | -1.4  |
| R33 27                           | 253 | 44741 | 1.41 | 18.344 | 1.9 | 0.5064 | 3.3 | 0.0674  | 2.7 | 0.825 | 420.5  | 11.2 | 416    | 11.4 | 391.3  | 42.2 | -7.5  |
| R33 28                           | 540 | 2E+05 | 1.55 | 18.364 | 2   | 0.5167 | 3.3 | 0.06886 | 2.6 | 0.802 | 429.3  | 11   | 423    | 11.4 | 388.8  | 44.2 | -10.4 |
| R33 29                           | 711 | 2E+05 | 1.58 | 18.056 | 2.5 | 0.5132 | 3.6 | 0.06724 | 2.6 | 0.726 | 419.5  | 10.6 | 420.6  | 12.4 | 426.7  | 55.2 | 1.7   |
| R33 3                            | 259 | 43002 | 1.81 | 18.104 | 3   | 0.5188 | 4.6 | 0.06815 | 3.5 | 0.761 | 425    | 14.4 | 424.4  | 15.9 | 420.8  | 66.5 | -1.0  |
| R33 30                           | 198 | 73164 | 1.23 | 18.544 | 2.4 | 0.5116 | 4.1 | 0.06883 | 3.4 | 0.817 | 429.1  | 14   | 419.5  | 14.1 | 367    | 53.4 | -16.9 |
| R33 4                            | 732 | 3E+05 | 1.71 | 17.93  | 2.4 | 0.5172 | 3.4 | 0.06729 | 2.4 | 0.71  | 419.8  | 9.7  | 423.3  | 11.7 | 442.3  | 52.7 | 5.1   |
| R33 5                            | 100 | 56058 | 1.58 | 17.818 | 4.5 | 0.5224 | 5.9 | 0.06754 | 3.8 | 0.652 | 421.3  | 15.6 | 426.7  | 20.5 | 456.2  | 99.1 | 7.7   |
| R33 7                            | 379 | 1E+06 | 1.68 | 18.27  | 3   | 0.5156 | 3.8 | 0.06836 | 2.4 | 0.63  | 426.3  | 9.9  | 422.2  | 13.1 | 400.3  | 66.1 | -6.5  |
| R33 8                            | 170 | 45687 | 1.3  | 18.238 | 3.6 | 0.5107 | 4.7 | 0.06758 | 3   | 0.641 | 421.6  | 12.2 | 418.9  | 16   | 404.3  | 80   | -4.3  |
| R33 9                            | 693 | 3E+05 | 1.7  | 18     | 1.9 | 0.5136 | 3.2 | 0.06707 | 2.6 | 0.818 | 418.5  | 10.7 | 420.8  | 11.1 | 433.7  | 41.2 | 3.5   |
| <b>R33 CA Run 2 (discordant)</b> |     |       |      |        |     |        |     |         |     |       |        |      |        |      |        |      |       |
| R33 6                            | 166 | 4E+05 | 2.12 | 6.231  | 1.8 | 10.048 | 3.8 | 0.45425 | 3.3 | 0.88  | 2414.1 | 67.2 | 2439.2 | 35   | 2460.2 | 30.4 | 1.9   |
