# Supplementary material for: Increased accuracy and precision in igneous and detrital zircon geochronology using CA-LA-ICPMS
Source: Copernicus journal article supplement (doi:10.5194/gchron-2023-20), 2023-08-25
Supplement: Supplementary file 26 [file gchron-2023-20-supplement.zip]

**TABLE S3: 49127 LA-ICPMS U-Pb ZIRCON GEOCHRONOLOGY RESULTS**

| Composition                    |         |             |      |             |        |            |        |            |        |             | Ages       |         |            |         |             |         |
|--------------------------------|---------|-------------|------|-------------|--------|------------|--------|------------|--------|-------------|------------|---------|------------|---------|-------------|---------|
| Zircon #                       | U (ppm) | 206Pb/204Pb | U/Th | 206Pb/207Pb | 2σ (%) | 207Pb/235U | 2σ (%) | 206Pb/238U | 2σ (%) | Error Corr. | 206Pb/238U | 2σ (Ma) | 207Pb/235U | 2σ (Ma) | 206Pb/207Pb | 2σ (Ma) |
| 49127 no CA Run 1              |         |             |      |             |        |            |        |            |        |             |            |         |            |         |             |         |
| 49127-1                        | 416     | 10652       | 1.76 | 20.241      | 3.5    | 0.1476     | 4.8    | 0.02168    | 3.3    | 0.683       | 138.3      | 4.5     | 139.8      | 6.3     | 166.1       | 82.1    |
| 49127-2                        | 127     | 1229        | 1.15 | 20.503      | 11.0   | 0.1435     | 13.2   | 0.02135    | 7.4    | 0.558       | 136.2      | 10.0    | 136.2      | 16.9    | 135.9       | 258.4   |
| 49127-3                        | 92      | 11375       | 1.88 | 25.496      | 6.2    | 0.1566     | 7.9    | 0.02897    | 4.9    | 0.618       | 184.1      | 8.9     | 147.7      | 10.9    | NA          | NA      |
| 49127-5                        | 82      | 12448       | 2.04 | 17.172      | 12.8   | 0.1901     | 16.2   | 0.02369    | 9.9    | 0.613       | 150.9      | 14.8    | 176.7      | 26.2    | 537.7       | 279.8   |
| 49127-6                        | 307     | 4976        | 1.19 | 21.159      | 7.7    | 0.1437     | 8.8    | 0.02206    | 4.4    | 0.496       | 140.7      | 6.1     | 136.3      | 11.3    | 61.3        | NA      |
| 49127-7                        | 159     | 4559        | 1.04 | 20.863      | 7.5    | 0.1519     | 10.4   | 0.02300    | 7.2    | 0.689       | 146.6      | 10.4    | 143.6      | 13.9    | 94.9        | 178.0   |
| 49127-8                        | 1523    | 23463       | 1.16 | 21.092      | 1.9    | 0.1416     | 3.1    | 0.02167    | 2.5    | 0.801       | 138.2      | 3.4     | 134.4      | 3.9     | 68.9        | 44.5    |
| 49127-10                       | 996     | 20920       | 1.85 | 20.769      | 2.5    | 0.1439     | 3.9    | 0.02169    | 2.9    | 0.765       | 138.3      | 4.0     | 136.6      | 4.9     | 105.5       | 58.7    |
| 49127-11                       | 279     | 12689       | 1.15 | 20.942      | 5.2    | 0.1514     | 9.5    | 0.02300    | 8.0    | 0.842       | 146.6      | 11.6    | 143.1      | 12.7    | 86.0        | 122.3   |
| 49127-12                       | 130     | 2787        | 1.12 | 20.408      | 14.0   | 0.1581     | 14.9   | 0.02341    | 4.9    | 0.331       | 149.2      | 7.3     | 149.0      | 20.6    | 146.8       | NA      |
| 49127-13                       | 120     | 2484        | 1.44 | 23.866      | 7.2    | 0.1315     | 10.6   | 0.02278    | 7.9    | 0.739       | 145.2      | 11.3    | 125.5      | 12.5    | NA          | NA      |
| 49127-15                       | 211     | 8166        | 1.10 | 18.705      | 5.7    | 0.1640     | 7.6    | 0.02225    | 5.2    | 0.673       | 141.9      | 7.2     | 154.2      | 10.9    | 347.4       | 127.9   |
| 49127 no CA run 1 (discordant) |         |             |      |             |        |            |        |            |        |             |            |         |            |         |             |         |
| 49127-4                        | 124     | 4643        | 0.99 | 23.411      | 6.1    | 0.1447     | 20.5   | 0.02459    | 19.5   | 0.955       | 156.6      | 30.2    | 137.3      | 26.3    | NA          | NA      |
| 49127-9                        | 891     | 8761        | 1.91 | 21.388      | 3.8    | 0.1400     | 13.7   | 0.02172    | 13.2   | 0.961       | 138.5      | 18.0    | 133.0      | 17.1    | 35.7        | NA      |
| 49127-14                       | 139     | 3722        | 1.54 | 34.109      | 14.8   | 0.1802     | 61.8   | 0.04460    | 60.0   | 0.971       | 281.3      | 165.1   | 168.2      | 95.9    | NA          | NA      |
| 49127 no CA Run 2              |         |             |      |             |        |            |        |            |        |             |            |         |            |         |             |         |
| 49127 1                        | 146     | 5000        | 1.18 | 21.802      | 10.7   | 0.1322     | 11.2   | 0.02091    | 3.2    | 0.286       | 133.4      | 4.2     | 126.1      | 13.3    | 10.4        | 259.1   |
| 49127 10                       | 218     | 5000        | 1.86 | 21.63       | 10.6   | 0.1355     | 10.8   | 0.02126    | 1.9    | 0.176       | 135.6      | 2.5     | 129        | 13.1    | 8.6         | 255.3   |
| 49127 11                       | 171     | 46403       | 1.66 | 20.523      | 5      | 0.143      | 6      | 0.0213     | 3.3    | 0.55        | 135.9      | 4.4     | 135.8      | 7.6     | 133.7       | 117.9   |
| 49127 12                       | 51      | 5000        | 1.88 | 22.207      | 14.3   | 0.1337     | 15     | 0.02154    | 4.6    | 0.305       | 137.4      | 6.2     | 127.4      | 18      | 55          | 349     |
| 49127 13                       | 101     | 5000        | 2.06 | 21.713      | 10.4   | 0.1344     | 11     | 0.02118    | 3.5    | 0.317       | 135.1      | 4.6     | 128.1      | 13.2    | 0.5         | 251     |
| 49127 14                       | 132     | 24537       | 1.71 | 19.72       | 5.4    | 0.147      | 6.4    | 0.02104    | 3.5    | 0.538       | 134.2      | 4.6     | 139.3      | 8.4     | 226.6       | 125.2   |
| 49127 15                       | 150     | 69357       | 1.55 | 20.372      | 4.8    | 0.1444     | 5.4    | 0.02135    | 2.6    | 0.471       | 136.2      | 3.4     | 137        | 6.9     | 150.9       | 112     |
| 49127 16                       | 141     | 163670      | 1.33 | 20.226      | 5      | 0.143      | 5.9    | 0.02099    | 3.2    | 0.541       | 133.9      | 4.3     | 135.7      | 7.5     | 167.7       | 116.8   |
| 49127 17                       | 83      | 82457       | 1.67 | 19.951      | 6.4    | 0.1462     | 6.9    | 0.02116    | 2.7    | 0.386       | 135        | 3.6     | 138.6      | 9       | 199.7       | 148.5   |
| 49127 18                       | 74      | 5000        | 1.82 | 21.006      | 11.1   | 0.137      | 11.8   | 0.02088    | 4.1    | 0.343       | 133.2      | 5.4     | 130.3      | 14.5    | 78.6        | 264.2   |
| 49127 19                       | 98      | 5000        | 1.87 | 21.505      | 11.2   | 0.136      | 11.6   | 0.02122    | 3.1    | 0.269       | 135.4      | 4.2     | 129.5      | 14.1    | 22.6        | 268.1   |
| 49127 2                        | 1060    | 365080      | 2.01 | 20.754      | 2.3    | 0.1477     | 3.1    | 0.02224    | 2      | 0.651       | 141.8      | 2.8     | 139.9      | 4       | 107.3       | 55.4    |
| 49127 20                       | 94      | 119437      | 1.55 | 20.129      | 5.9    | 0.144      | 7      | 0.02103    | 3.7    | 0.527       | 134.1      | 4.9     | 136.6      | 8.9     | 179         | 137.9   |
| 49127 21                       | 107     | 238006      | 1.16 | 20.379      | 5.5    | 0.1424     | 6.3    | 0.02106    | 2.9    | 0.47        | 134.4      | 3.9     | 135.2      | 7.9     | 150.1       | 129.5   |
| 49127 22                       | 192     | 5000        | 1.36 | 22.166      | 10.5   | 0.1305     | 10.9   | 0.02099    | 2.8    | 0.254       | 133.9      | 3.7     | 124.6      | 12.8    | 50.6        | 256.2   |
| 49127 23                       | 130     | 5000        | 1.34 | 21.097      | 11.5   | 0.1365     | 12.1   | 0.02089    | 3.7    | 0.307       | 133.3      | 4.9     | 129.9      | 14.7    | 68.3        | 274     |
| 49127 24                       | 189     | 41627       | 1.66 | 20.506      | 4      | 0.1409     | 4.7    | 0.02096    | 2.6    | 0.54        | 133.7      | 3.4     | 133.8      | 5.9     | 135.5       | 93.7    |
| 49127 25                       | 865     | 4509535     | 2.15 | 20.547      | 2.1    | 0.1461     | 3      | 0.02178    | 2.2    | 0.724       | 138.9      | 3       | 138.4      | 3.9     | 130.9       | 49.4    |
| 49127 26                       | 158     | 58523       | 1.27 | 20.406      | 5.3    | 0.1403     | 6.3    | 0.02077    | 3.4    | 0.533       | 132.5      | 4.4     | 133.3      | 7.9     | 147.1       | 125     |
| 49127 27                       | 422     | 33138       | 1.44 | 21.113      | 3      | 0.1405     | 4      | 0.02153    | 2.6    | 0.651       | 137.3      | 3.5     | 133.5      | 5       | 66.6        | 71.9    |
| 49127 28                       | 83      | 5000        | 1.59 | 20.537      | 10.8   | 0.1435     | 11.8   | 0.02139    | 4.6    | 0.39        | 136.4      | 6.2     | 136.2      | 15      | 131.9       | 254.8   |
| 49127 29                       | 1325    | 146336      | 1.84 | 20.686      | 2.4    | 0.15       | 3.3    | 0.02251    | 2.3    | 0.706       | 143.5      | 3.3     | 141.9      | 4.4     | 115         | 55.5    |
| 49127 3                        | 183     | 5000        | 1.25 | 22.108      | 10.2   | 0.1321     | 10.8   | 0.0212     | 3.7    | 0.341       | 135.2      | 4.9     | 126        | 12.8    | 44.1        | 247.7   |
| 49127 30                       | 929     | 112969      | 2.17 | 20.233      | 2.4    | 0.1482     | 3.4    | 0.02176    | 2.4    | 0.709       | 138.8      | 3.3     | 140.3      | 4.4     | 166.9       | 55.4    |
| 49127 4                        | 226     | 379859      | 1.21 | 19.903      | 6.2    | 0.1452     | 7      | 0.02097    | 3.2    | 0.464       | 133.8      | 4.3     | 137.6      | 9       | 205.2       | 143.8   |
| 49127 5                        | 311     | 106614      | 1.94 | 20.701      | 3.1    | 0.1428     | 4.1    | 0.02145    | 2.7    | 0.661       | 136.8      | 3.7     | 135.5      | 5.3     | 113.3       | 73.4    |
| 49127 6                        | 1104    | 365913      | 1.36 | 20.456      | 2.2    | 0.1502     | 2.8    | 0.0223     | 1.7    | 0.614       | 142.2      | 2.5     | 142.1      | 3.8     | 141.2       | 52.7    |
| 49127 7                        | 1485    | 122205      | 2.01 | 20.48       | 2      | 0.1514     | 2.8    | 0.0225     | 2.1    | 0.724       | 143.4      | 2.9     | 143.2      | 3.8     | 138.5       | 46.1    |
| 49127 8                        | 140     | 29310       | 1.24 | 20.498      | 5.9    | 0.1416     | 6.7    | 0.02106    | 3.2    | 0.477       | 134.3      | 4.2     | 134.5      | 8.4     | 136.5       | 137.7   |
| 49127 9                        | 115     | 5000        | 1.19 | 22.031      | 11.1   | 0.1302     | 11.7   | 0.02081    | 3.8    | 0.321       | 132.8      | 5       | 124.2      | 13.7    | 35.7        | 270.1   |
| Composition                    |         |             |      |             |        |            |        |            |        |             | Ages       |         |            |         |             |         |
| Zircon #                       | U (ppm) | 206Pb/204Pb | U/Th | 206Pb/207Pb | 2σ (%) | 207Pb/235U | 2σ (%) | 206Pb/238U | 2σ (%) | Error Corr. | 206Pb/238U | 2σ (Ma) | 207Pb/235U | 2σ (Ma) | 206Pb/207Pb | 2σ (Ma) |
| 49127 CA Run 1                 |         |             |      |             |        |            |        |            |        |             |            |         |            |         |             |         |
| 49127-2                        | 152     | 830         | 1.31 | 24.046      | 18.1   | 0.119      | 18.4   | 0.02071    | 3.2    | 0.176       | 132.1      | 4.2     | 113.9      | 19.8    | NA          | NA      |
| 49127-4                        | 210     | 2073        | 1.66 | 23.756      | 5.8    | 0.129      | 7.2    | 0.02222    | 4.2    | 0.589       | 141.7      | 5.9     | 123.1      | 8.3     | NA          | NA      |
| 49127-5                        | 136     | 1202        | 1.48 | 15.038      | 17.5   | 0.187      | 18.6   | 0.02046    | 6.4    | 0.345       | 130.5      | 8.3     | 174.5      | 29.9    | 821.2       | 366.0   |
| 49127-6                        | 3222    | 64816       | 5.64 | 20.330      | 2.3    | 0.149      | 3.7    | 0.02204    | 2.9    | 0.780       | 140.5      | 4.0     | 141.4      | 4.9     | 155.8       | 54.6    |
| 49127-7                        | 222     | 1324        | 1.11 | 25.646      | 13.1   | 0.119      | 14.2   | 0.02216    | 5.4    | 0.378       | 141.3      | 7.5     | 114.2      | 15.3    | NA          | NA      |
| 49127-8                        | 200     | 830         | 1.50 | 25.599      | 47.7   | 0.112      | 48.1   | 0.02074    | 5.6    | 0.116       | 132.4      | 7.3     | 107.5      | 49.0    | NA          | NA      |
| 49127-9                        | 238     | 8406        | 1.05 | 19.601      | 6.8    | 0.156      | 7.9    | 0.02212    | 4.0    | 0.508       | 141.0      | 5.6     | 146.8      | 10.8    | 240.6       | 156.4   |
| 49127-10                       | 485     | 8867        | 2.06 | 17.816      | 7.9    | 0.171      | 8.7    | 0.02206    | 3.7    | 0.424       | 140.7      | 5.1     | 160.0      | 12.9    | 456.5       | 175.1   |
| 49127-11                       | 367     | 8870        | 1.21 | 20.277      | 5.2    | 0.147      | 6.9    | 0.02170    | 4.5    | 0.656       | 138.4      | 6.2     | 139.7      | 9.0     | 161.9       | 122.1   |
| 49127-12                       | 249     | 2237        | 1.53 | 18.206      | 9.8    | 0.168      | 10.9   | 0.02220    | 4.7    | 0.431       | 141.5      | 6.6     | 157.7      | 15.9    | 408.2       | 219.2   |
| 49127-13                       | 399     | 19088       | 1.81 | 20.773      | 4.5    | 0.146      | 5.6    | 0.02202    | 3.3    | 0.597       | 140.4      | 4.6     | 138.5      | 7.2     | 105.1       | 105.4   |
| 49127-14                       | 109     | 20817       | 2.10 | 16.680      | 12.2   | 0.176      | 15.2   | 0.02136    | 9.1    | 0.598       | 136.3      | 12.3    | 165.0      | 23.2    | 600.9       | 264.4   |
| 49127-15                       | 172     | 2589        | 2.36 | 19.481      | 9.7    | 0.147      | 11.4   | 0.02074    | 5.8    | 0.514       | 132.3      | 7.7     | 139.0      | 14.8    | 254.8       | 224.0   |
| 49127 CA Run 1 (discordant)    |         |             |      |             |        |            |        |            |        |             |            |         |            |         |             |         |
| 49127-1                        | 149     | 35254       | 1.59 | 19.235      | 10.5   | 0.176      | 26.0   | 0.02460    | 23.8   | 0.915       | 156.6      | 36.8    | 164.8      | 39.6    | 284.0       | 240.5   |
| 49127-3                        | 335     | 6132        | 1.68 | 26.640      | 5.8    | 0.147      | 55.5   | 0.02841    | 55.2   | 0.995       | 180.6      | 98.3    | 139.3      | 72.2    | NA          | NA      |
| 49127 CA Run 2                 |         |             |      |             |        |            |        |            |        |             |            |         |            |         |             |         |
| 49127 1                        | 269     | 26367       | 0.99 | 20.781      | 6.8    | 0.146      | 7.5    | 0.02202    | 3.2    | 0.423       | 140.4      | 4.4     | 138.4      | 9.7     | 104.1       | 160.1   |
| 49127 10                       | 219     | 5000        | 1.03 | 22.118      | 10.7   | 0.1353     | 11.2   | 0.02171    | 3.2    | 0.289       | 138.4      | 4.4     | 128.8      | 13.5    | 45.3        | 260.5   |
| 49127 11                       | 167     | 5000        | 1.53 | 20.94       | 10.7   | 0.1415     | 11     | 0.02149    | 2.7    | 0           |            |         |            |         |             |         |

|          |     |        |      |        |      |        |      |         |     |       |       |     |       |      |       |       |
|----------|-----|--------|------|--------|------|--------|------|---------|-----|-------|-------|-----|-------|------|-------|-------|
| 49127 20 | 767 | 5000   | 1.63 | 22.11  | 2.7  | 0.136  | 4.2  | 0.02182 | 3.2 | 0.76  | 139.1 | 4.4 | 129.5 | 5.1  | 500   | 1.0   |
| 49127 21 | 205 | 5000   | 1.04 | 21.299 | 10.4 | 0.139  | 10.9 | 0.02148 | 3   | 0.277 | 137   | 4.1 | 132.2 | 13.5 | 45.7  | 249.4 |
| 49127 22 | 429 | 54677  | 1.93 | 20.269 | 5.1  | 0.1491 | 6    | 0.02192 | 3.1 | 0.514 | 139.8 | 4.2 | 141.1 | 7.9  | 162.8 | 119.7 |
| 49127 23 | 118 | 5000   | 1.45 | 21.851 | 12.8 | 0.1382 | 13.4 | 0.02191 | 4.1 | 0.304 | 139.7 | 5.6 | 131.4 | 16.6 | 15.8  | 309.6 |
| 49127 24 | 220 | 88472  | 1.09 | 20.439 | 6.1  | 0.1476 | 6.8  | 0.0219  | 3.1 | 0.454 | 139.6 | 4.3 | 139.8 | 8.9  | 143.3 | 142.6 |
| 49127 25 | 187 | 5000   | 1.38 | 22.332 | 11.4 | 0.1343 | 12   | 0.02176 | 4   | 0.329 | 138.8 | 5.4 | 127.9 | 14.5 | 68.8  | 278.0 |
| 49127 26 | 295 | 46441  | 1.46 | 20.975 | 5.9  | 0.1438 | 7.1  | 0.02188 | 3.8 | 0.543 | 139.5 | 5.3 | 136.4 | 9    | 82.1  | 141.1 |
| 49127 27 | 194 | 5000   | 1.47 | 22.051 | 6.5  | 0.1355 | 7.5  | 0.02168 | 3.8 | 0.505 | 138.3 | 5.2 | 129   | 9.1  | 38    | 157.9 |
| 49127 28 | 434 | 35382  | 1.29 | 21.548 | 5.4  | 0.1426 | 6.3  | 0.0223  | 3.2 | 0.502 | 142.2 | 4.4 | 135.4 | 8    | 17.8  | 130.6 |
| 49127 29 | 208 | 5000   | 1.23 | 21.738 | 10.9 | 0.1349 | 11.3 | 0.02128 | 2.8 | 0.245 | 135.8 | 3.7 | 128.5 | 13.6 | 3.3   | 263.6 |
| 49127 3  | 205 | 5000   | 1.07 | 21.554 | 10.7 | 0.1388 | 11.3 | 0.02171 | 3.7 | 0.325 | 138.5 | 5   | 132   | 14   | 17.1  | 256.4 |
| 49127 30 | 451 | 61717  | 2.01 | 20.468 | 4.6  | 0.146  | 4.9  | 0.02169 | 1.9 | 0.376 | 138.3 | 2.5 | 138.4 | 6.4  | 139.9 | 107.7 |
| 49127 4  | 410 | 31403  | 1.73 | 20.176 | 4.9  | 0.147  | 5.5  | 0.02152 | 2.6 | 0.477 | 137.2 | 3.6 | 139.2 | 7.2  | 173.5 | 113.8 |
| 49127 5  | 223 | 5000   | 0.99 | 22.831 | 11.2 | 0.1294 | 11.7 | 0.02144 | 3.5 | 0.3   | 136.8 | 4.8 | 123.6 | 13.6 | 123   | 275.9 |
| 49127 7  | 876 | 140926 | 1.46 | 20.574 | 3.6  | 0.147  | 4.6  | 0.02194 | 2.9 | 0.618 | 139.9 | 4   | 139.2 | 6    | 127.8 | 85.8  |
| 49127 8  | 449 | 32451  | 2.33 | 21.206 | 3.9  | 0.1417 | 4.7  | 0.02181 | 2.6 | 0.555 | 139.1 | 3.6 | 134.6 | 5.9  | 56.1  | 93.4  |
| 49127 9  | 184 | 5000   | 1.28 | 22.01  | 11.5 | 0.1373 | 12.2 | 0.02192 | 3.9 | 0.321 | 139.8 | 5.4 | 130.6 | 14.9 | 33.4  | 279.9 |

| %<br>Disc. |
|------------|
| 16.8       |
| -0.2       |
| NA         |
| 71.9       |
| -129.3     |
| -54.5      |
| -100.4     |
| -31.1      |
| -70.5      |
| -1.6       |
| NA         |
| 59.2       |

|          |
|----------|
| NA       |
| -288.0   |
| NA       |
| -1182.7  |
| -1476.7  |
| -1.6     |
| -149.8   |
| -26920.0 |
| 40.8     |
| 9.7      |
| 20.2     |
| 32.4     |
| -69.5    |
| -499.1   |
| -32.2    |
| 25.1     |
| 10.5     |
| -164.6   |
| -95.2    |
| 1.3      |
| -6.1     |
| 9.9      |
| -106.2   |
| -3.4     |
| -24.8    |
| -206.6   |
| 16.8     |
| 34.8     |
| -20.7    |
| -0.7     |
| -3.5     |
| 1.6      |
| -272.0   |

| %<br>Disc. |
|------------|
| NA         |
| NA         |
| 84.1       |
| 9.8        |
| NA         |
| NA         |
| 41.4       |
| 69.2       |
| 14.5       |
| 65.3       |
| -33.6      |
| 77.3       |
| 48.1       |

|        |
|--------|
| 44.8   |
| NA     |
| -34.9  |
| -205.5 |
| -59.0  |
| 27.7   |
| 12.2   |
| -0.9   |
| -3.2   |
| 19.5   |
| 27.5   |
| 26.1   |

72.2  
-199.8  
14.1  
-784.2  
2.6  
-101.7  
-69.9  
-263.9  
-698.9  
-4015.2  
-709.9  
1.1  
20.9  
-11.2  
-9.5  
-148.0  
-318.6
