# Supplementary material for: Increased accuracy and precision in igneous and detrital zircon geochronology using CA-LA-ICPMS
Source: Copernicus journal article supplement (doi:10.5194/gchron-2023-20), 2023-08-25
Supplement: Supplementary file 27 [file gchron-2023-20-supplement.zip]

**TABLE S11: Oracle LA-ICPMS U-Pb ZIRCON GEOCHRONOLOGY**

| Zircon #                  | Composition |             |       |             |        |            |        |            |        |       | Ages       |         |            |         |             |         |         |
|---------------------------|-------------|-------------|-------|-------------|--------|------------|--------|------------|--------|-------|------------|---------|------------|---------|-------------|---------|---------|
|                           | U (ppm)     | 206Pb/204Pb | U/Th  | 206Pb/207Pb | 2σ (%) | 207Pb/235U | 2σ (%) | 206Pb/238U | 2σ (%) | Corr. | 206Pb/238U | 2σ (Ma) | 207Pb/235U | 2σ (Ma) | 206Pb/207Pb | 2σ (Ma) | % Disc. |
| <b>Oracle no CA Run 1</b> |             |             |       |             |        |            |        |            |        |       |            |         |            |         |             |         |         |
| Oracle-1                  | 256         | 31165       | 2.3   | 11.110      | 1.7    | 2.9605     | 3.9    | 0.23865    | 3.5    | 0.9   | 1379.7     | 43.8    | 1397.5     | 29.6    | 1424.8      | 32.1    | 3.2     |
| Oracle-2                  | 566         | 51042       | 10.9  | 10.999      | 1.4    | 3.0273     | 3.8    | 0.24159    | 3.5    | 0.9   | 1395.0     | 44.1    | 1414.5     | 28.8    | 1444.1      | 26.5    | 3.4     |
| Oracle-3                  | 172         | 48861       | 1.9   | 10.910      | 2.2    | 3.0111     | 4.2    | 0.23835    | 3.6    | 0.9   | 1378.1     | 44.8    | 1410.4     | 32.1    | 1459.6      | 41.0    | 5.6     |
| Oracle-4                  | 482         | 85747       | 2.6   | 10.968      | 1.9    | 2.8222     | 3.2    | 0.22461    | 2.6    | 0.8   | 1306.2     | 30.4    | 1361.5     | 24.1    | 1449.3      | 36.9    | 9.9     |
| Oracle-5                  | 106         | 14803       | 1.8   | 11.109      | 2.3    | 2.9636     | 3.8    | 0.23888    | 3.1    | 0.8   | 1380.9     | 38.6    | 1398.3     | 29.1    | 1425.1      | 43.1    | 3.1     |
| Oracle-6                  | 101         | 19323       | 1.2   | 11.057      | 2.0    | 3.0292     | 3.5    | 0.24303    | 2.9    | 0.8   | 1402.4     | 36.8    | 1415.0     | 26.9    | 1434.0      | 37.5    | 2.2     |
| Oracle-7                  | 245         | 556715      | 2.7   | 11.020      | 2.1    | 3.0413     | 3.7    | 0.24318    | 3.0    | 0.8   | 1403.2     | 38.1    | 1418.1     | 27.9    | 1440.5      | 39.2    | 2.6     |
| Oracle-8                  | 559         | 92618       | 7.6   | 11.404      | 2.1    | 2.9130     | 4.1    | 0.24104    | 3.5    | 0.9   | 1392.1     | 44.4    | 1385.3     | 31.1    | 1374.7      | 40.2    | -1.3    |
| Oracle-9                  | 232         | 26758       | 6.1   | 10.899      | 2.9    | 3.2432     | 4.4    | 0.25649    | 3.3    | 0.7   | 1471.9     | 43.3    | 1467.6     | 34.2    | 1461.3      | 55.7    | -0.7    |
| Oracle-10                 | 247         | 43724       | 2.2   | 10.693      | 4.1    | 3.2392     | 4.8    | 0.25132    | 2.5    | 0.5   | 1445.3     | 32.8    | 1466.6     | 37.5    | 1497.6      | 77.7    | 3.5     |
| Oracle-11                 | 604         | 72330       | 5.2   | 11.021      | 1.8    | 2.9662     | 3.6    | 0.23719    | 3.1    | 0.9   | 1372.1     | 38.4    | 1399.0     | 27.1    | 1440.3      | 33.6    | 4.7     |
| Oracle-12                 | 223         | 451965      | 3.0   | 11.086      | 2.0    | 3.1000     | 3.2    | 0.24935    | 2.5    | 0.8   | 1435.1     | 31.8    | 1432.7     | 24.3    | 1429.1      | 37.9    | -0.4    |
| Oracle-13                 | 294         | 39324       | 6.9   | 11.013      | 1.8    | 3.0245     | 3.4    | 0.24169    | 2.9    | 0.8   | 1395.5     | 35.8    | 1413.8     | 25.9    | 1441.6      | 35.2    | 3.2     |
| Oracle-14                 | 177         | 44719       | 1.3   | 10.929      | 2.0    | 3.0827     | 3.3    | 0.24445    | 2.6    | 0.8   | 1409.8     | 32.9    | 1428.4     | 25.1    | 1456.2      | 37.8    | 3.2     |
| Oracle-15                 | 79          | 12103       | 1.8   | 11.157      | 2.1    | 3.0353     | 4.1    | 0.24572    | 3.6    | 0.9   | 1416.4     | 45.4    | 1416.5     | 31.7    | 1416.8      | 40.5    | 0.0     |
| <b>Oracle no CA Run 2</b> |             |             |       |             |        |            |        |            |        |       |            |         |            |         |             |         |         |
| ORACLE 1                  | 114         | 414564      | 1.2   | 11.082      | 2.3    | 3.1473     | 4.3    | 0.25307    | 3.7    | 0.847 | 1454.3     | 47.8    | 1444.3     | 33.4    | 1429.7      | 44.1    | -1.7    |
| ORACLE 10                 | 704         | 273742      | 6.98  | 11.054      | 1.6    | 3.0541     | 3.1    | 0.24496    | 2.6    | 0.846 | 1412.4     | 32.9    | 1421.3     | 23.4    | 1434.5      | 31.1    | 1.5     |
| ORACLE 11                 | 346         | 211041      | 3.32  | 11.038      | 1.6    | 3.0282     | 2.6    | 0.24254    | 2.1    | 0.797 | 1399.9     | 26.3    | 1414.8     | 20      | 1437.2      | 30.2    | 2.6     |
| ORACLE 12                 | 160         | 248470      | 2.83  | 11.008      | 1.5    | 3.0453     | 2.8    | 0.24323    | 2.4    | 0.845 | 1403.5     | 30.2    | 1419.1     | 21.6    | 1442.5      | 28.9    | 2.7     |
| ORACLE 13                 | 41          | 894564      | 1.74  | 11.097      | 2.8    | 3.0794     | 4.4    | 0.24795    | 3.5    | 0.781 | 1427.9     | 44.4    | 1427.6     | 34      | 1427.1      | 53      | -0.1    |
| ORACLE 14                 | 344         | 392460      | 4.93  | 11.088      | 2.1    | 3.0452     | 3.3    | 0.24499    | 2.6    | 0.786 | 1412.6     | 33.1    | 1419       | 25.4    | 1428.7      | 39.2    | 1.1     |
| ORACLE 15                 | 1142        | 428035      | 21.56 | 10.888      | 2      | 3.0597     | 3.2    | 0.24173    | 2.5    | 0.787 | 1395.7     | 31.7    | 1422.7     | 24.6    | 1463.3      | 37.6    | 4.6     |
| ORACLE 16                 | 121         | 1E+06       | 2.44  | 11.009      | 2.2    | 3.0501     | 3.5    | 0.24364    | 2.8    | 0.793 | 1405.6     | 35.4    | 1420.3     | 27      | 1442.3      | 41.1    | 2.5     |
| ORACLE 17                 | 52          | 68909       | 1.49  | 11.155      | 2      | 3.1299     | 3.7    | 0.25333    | 3.1    | 0.835 | 1455.6     | 40.1    | 1440.1     | 28.4    | 1417.2      | 38.8    | -2.7    |
| ORACLE 18                 | 92          | 7E+06       | 1.58  | 11.203      | 2.2    | 3.0494     | 3.4    | 0.24788    | 2.6    | 0.76  | 1427.5     | 33.1    | 1420.1     | 26      | 1409        | 42.2    | -1.3    |
| ORACLE 19                 | 80          | 71272       | 1.42  | 11.125      | 1.9    | 3.0982     | 4.1    | 0.2501     | 3.6    | 0.88  | 1439       | 46.3    | 1432.2     | 31.3    | 1422.2      | 37      | -1.2    |
| ORACLE 2                  | 127         | 102433      | 1.74  | 11.09       | 1.8    | 3.0408     | 3.4    | 0.24469    | 2.9    | 0.848 | 1411       | 36.3    | 1417.9     | 25.8    | 1428.3      | 34.2    | 1.2     |
| ORACLE 20                 | 42          | 22639       | 0.81  | 11.109      | 2.5    | 3.1009     | 5      | 0.24994    | 4.3    | 0.862 | 1438.2     | 55.9    | 1432.9     | 38.6    | 1425.1      | 48.6    | -0.9    |
| ORACLE 21                 | 111         | 163020      | 1.94  | 11.029      | 2.1    | 3.1083     | 3.6    | 0.24875    | 2.9    | 0.816 | 1432       | 37.8    | 1434.7     | 27.7    | 1438.8      | 39.8    | 0.5     |
| ORACLE 22                 | 99          | 109347      | 1.26  | 11.071      | 2.2    | 3.2241     | 4.2    | 0.259      | 3.6    | 0.854 | 1484.7     | 47.7    | 1463       | 32.7    | 1431.5      | 41.9    | -3.7    |
| ORACLE 23                 | 108         | 3E+06       | 1.5   | 11.029      | 2      | 3.1754     | 3.7    | 0.25411    | 3      | 0.829 | 1459.6     | 39.6    | 1451.2     | 28.2    | 1438.9      | 38.9    | -1.4    |
| ORACLE 25                 | 179         | 63855       | 4.11  | 11.124      | 1.8    | 3.2188     | 3.6    | 0.2598     | 3.2    | 0.873 | 1488.8     | 41.9    | 1461.7     | 28      | 1422.5      | 33.6    | -4.7    |
| ORACLE 27                 | 106         | 72994       | 1.76  | 11.015      | 2.4    | 3.0471     | 3.4    | 0.24354    | 2.5    | 0.731 | 1405.1     | 31.8    | 1419.5     | 26.4    | 1441.2      | 44.8    | 2.5     |
| ORACLE 28                 | 92          | 72433       | 2.17  | 11.055      | 2      | 3.0801     | 3.2    | 0.24707    | 2.5    | 0.784 | 1423.4     | 32.5    | 1427.8     | 24.9    | 1434.3      | 38.4    | 0.8     |
| ORACLE 3                  | 226         | 329363      | 3.74  | 11.153      | 1.6    | 3.0144     | 3.3    | 0.24394    | 2.9    | 0.867 | 1407.2     | 36.1    | 1411.3     | 25.1    | 1417.5      | 31.3    | 0.7     |
| ORACLE 30                 | 102         | 212896      | 1.72  | 11.112      | 2.4    | 3.1019     | 4.1    | 0.25011    | 3.4    | 0.82  | 1439       | 43.9    | 1433.2     | 31.8    | 1424.5      | 45.3    | -1.0    |
| ORACLE 4                  | 165         | 382871      | 2.64  | 11.136      | 1.6    | 3.1231     | 3.4    | 0.25234    | 3      | 0.88  | 1450.6     | 39      | 1438.4     | 26.3    | 1420.5      | 31      | -2.1    |

|                                 |       |        |      |        |     |        |      |         |      |       |        |        |        |       |        |       |       |
|---------------------------------|-------|--------|------|--------|-----|--------|------|---------|------|-------|--------|--------|--------|-------|--------|-------|-------|
| ORACLE 5                        | 285   | 338334 | 2.61 | 11.066 | 1.8 | 3.1025 | 2.9  | 0.24911 | 2.3  | 0.787 | 1433.9 | 29.8   | 1433.3 | 22.6  | 1432.4 | 34.7  | -0.1  |
| ORACLE 6                        | 81    | 163860 | 1.54 | 11.082 | 1.9 | 3.1143 | 3.6  | 0.25041 | 3    | 0.84  | 1440.6 | 39     | 1436.2 | 27.6  | 1429.7 | 37.2  | -0.8  |
| ORACLE 7                        | 182   | 369622 | 1.68 | 11.102 | 1.8 | 3.0393 | 3.5  | 0.24483 | 3    | 0.862 | 1411.7 | 37.9   | 1417.5 | 26.5  | 1426.2 | 33.6  | 1.0   |
| ORACLE 8                        | 99    | 104027 | 1.34 | 11.393 | 2.5 | 3.0245 | 3.3  | 0.25002 | 2.2  | 0.668 | 1438.6 | 28.5   | 1413.8 | 25.2  | 1376.7 | 47.3  | -4.5  |
| ORACLE 9                        | 201   | 296114 | 2.51 | 10.981 | 1.6 | 3.1881 | 2.7  | 0.25403 | 2.1  | 0.794 | 1459.2 | 27.9   | 1454.3 | 20.8  | 1447.1 | 31.1  | -0.8  |
| Oracle no CA Run 2 (discordant) |       |        |      |        |     |        |      |         |      |       |        |        |        |       |        |       |       |
| ORACLE 24                       | 88    | 142415 | 3.07 | 11.157 | 1.5 | 3.2376 | 4.6  | 0.26211 | 4.4  | 0.946 | 1500.6 | 58.3   | 1466.2 | 35.7  | 1416.7 | 28.4  | -5.9  |
| ORACLE 26                       | 279   | 627209 | 4.76 | 11.172 | 1.5 | 2.9483 | 2.9  | 0.239   | 2.5  | 0.858 | 1381.5 | 31.2   | 1394.4 | 22.1  | 1414.3 | 28.7  | 2.3   |
| ORACLE 29                       | 327   | 10000  | 4.91 | 10     | 1   | 0.1    | 1    | 0.1     | 1    | 0.8   | 500    | 1      | 500    | 1     | 500    | 1     | 0.0   |
| Composition                     |       |        |      |        |     |        |      |         | Ages |       |        |        |        |       |        |       |       |
| Zircon                          | U     | 206Pb/ | U/Th | 206Pb/ | 2σ  | 207Pb/ | 2σ   | 206Pb/  | 2σ   | Corr. | 206Pb/ | 2σ     | 207Pb/ | 2σ    | 206Pb/ | 2σ    | %     |
| #                               | (ppm) | 204Pb  |      | 207Pb  | (%) | 235U   | (%)  | 238U    | (%)  |       | 238U   | (Ma)   | 235U   | (Ma)  | 207Pb  | (Ma)  | Disc. |
| Oracle CA Run 1                 |       |        |      |        |     |        |      |         |      |       |        |        |        |       |        |       |       |
| Oracle-1                        | 256   | 42437  | 0.94 | 11.037 | 2.0 | 3.006  | 4.3  | 0.24076 | 3.8  | 0.889 | 1390.7 | 47.4   | 1409.3 | 32.5  | 1437.5 | 37.3  | 3.3   |
| Oracle-2                        | 194   | 83148  | 1.53 | 11.371 | 1.8 | 2.989  | 3.2  | 0.24659 | 2.6  | 0.825 | 1420.9 | 33.5   | 1404.8 | 24.2  | 1380.4 | 34.5  | -2.9  |
| Oracle-3                        | 222   | 24360  | 2.25 | 10.954 | 1.7 | 3.095  | 3.1  | 0.24601 | 2.5  | 0.826 | 1417.9 | 32.4   | 1431.5 | 23.7  | 1451.9 | 33.1  | 2.3   |
| Oracle-4                        | 321   | 81698  | 2.25 | 11.156 | 2.3 | 3.081  | 3.5  | 0.24942 | 2.7  | 0.766 | 1435.5 | 34.9   | 1428.1 | 27.2  | 1417.0 | 43.6  | -1.3  |
| Oracle-5                        | 207   | 26367  | 2.49 | 11.011 | 2.0 | 3.069  | 3.4  | 0.24516 | 2.7  | 0.803 | 1413.5 | 34.9   | 1424.9 | 26.2  | 1441.9 | 38.9  | 2.0   |
| Oracle-6                        | 228   | 86016  | 2.18 | 11.131 | 2.1 | 3.173  | 2.8  | 0.25631 | 1.8  | 0.658 | 1471.0 | 24.1   | 1450.7 | 21.5  | 1421.2 | 40.1  | -3.5  |
| Oracle-7                        | 239   | 31511  | 2.01 | 11.019 | 2.5 | 3.046  | 3.7  | 0.24352 | 2.8  | 0.740 | 1405.0 | 34.9   | 1419.2 | 28.6  | 1440.5 | 47.9  | 2.5   |
| Oracle-8                        | 137   | 18724  | 2.54 | 11.068 | 2.5 | 3.006  | 3.3  | 0.24142 | 2.1  | 0.645 | 1394.1 | 26.5   | 1409.2 | 25.0  | 1432.0 | 47.8  | 2.7   |
| Oracle-10                       | 197   | 47671  | 2.37 | 11.188 | 2.1 | 2.915  | 4.2  | 0.23661 | 3.6  | 0.870 | 1369.0 | 44.8   | 1385.7 | 31.6  | 1411.5 | 39.4  | 3.0   |
| Oracle-11                       | 159   | 24921  | 1.22 | 11.230 | 2.4 | 3.065  | 4.2  | 0.24977 | 3.4  | 0.820 | 1437.3 | 44.4   | 1424.1 | 32.2  | 1404.4 | 46.0  | -2.3  |
| Oracle-12                       | 301   | 14008  | 1.33 | 11.053 | 2.4 | 3.141  | 3.2  | 0.25191 | 2.2  | 0.680 | 1448.3 | 28.5   | 1442.8 | 24.9  | 1434.7 | 45.2  | -0.9  |
| Oracle-13                       | 995   | 34667  | 3.97 | 11.044 | 1.5 | 3.103  | 2.9  | 0.24866 | 2.5  | 0.851 | 1431.6 | 31.9   | 1433.4 | 22.4  | 1436.2 | 29.2  | 0.3   |
| Oracle-14                       | 172   | 6748   | 1.97 | 11.273 | 1.8 | 2.967  | 3.7  | 0.24266 | 3.2  | 0.873 | 1400.5 | 40.6   | 1399.2 | 28.1  | 1397.1 | 34.6  | -0.2  |
| Oracle CA Run 1 (discordant)    |       |        |      |        |     |        |      |         |      |       |        |        |        |       |        |       |       |
| Oracle-9                        | 278   | 24283  | 2.49 | 10.270 | 2.1 | 3.524  | 4.5  | 0.26262 | 4.0  | 0.887 | 1503.3 | 53.8   | 1532.7 | 35.8  | 1573.5 | 39.1  | 4.5   |
| Oracle-15                       | 102   | 12576  | 1.21 | 12.001 | 9.6 | 4.068  | 60.8 | 0.35420 | 60.0 | 0.987 | 1954.6 | 1013.8 | 1647.9 | 505.5 | 1276.1 | 187.8 | -53.2 |
| Oracle CA Run 2                 |       |        |      |        |     |        |      |         |      |       |        |        |        |       |        |       |       |
| Oracle 10                       | 345   | 88057  | 1.35 | 11.077 | 1.6 | 3.0884 | 2.7  | 0.24822 | 2.2  | 0.799 | 1429.3 | 27.8   | 1429.8 | 20.8  | 1430.6 | 31.1  | 0.1   |
| Oracle 11                       | 433   | 339436 | 0.66 | 10.941 | 1.9 | 3.0977 | 4.5  | 0.24592 | 4.1  | 0.911 | 1417.4 | 52.6   | 1432.1 | 34.8  | 1454   | 35.7  | 2.5   |
| Oracle 12                       | 273   | 98315  | 2.48 | 11.068 | 2.1 | 3.1691 | 3.1  | 0.2545  | 2.3  | 0.74  | 1461.7 | 30     | 1449.7 | 23.9  | 1432.1 | 39.8  | -2.1  |
| Oracle 13                       | 260   | 203323 | 2.94 | 10.999 | 2.9 | 3.2058 | 4.1  | 0.25585 | 2.9  | 0.706 | 1468.6 | 38.2   | 1458.6 | 31.9  | 1444   | 55.6  | -1.7  |
| Oracle 14                       | 272   | 163346 | 2.72 | 11.217 | 2   | 3.1353 | 2.7  | 0.25518 | 1.7  | 0.649 | 1465.1 | 22.7   | 1441.4 | 20.6  | 1406.5 | 38.9  | -4.2  |
| Oracle 15                       | 264   | 384353 | 1.54 | 10.975 | 2.1 | 3.1191 | 2.9  | 0.24839 | 2.1  | 0.701 | 1430.1 | 26.3   | 1437.4 | 22.5  | 1448.2 | 39.7  | 1.2   |
| Oracle 16                       | 314   | 797585 | 2.45 | 11.121 | 2.1 | 3.1142 | 3    | 0.2513  | 2.1  | 0.709 | 1445.2 | 27.7   | 1436.2 | 23.1  | 1423   | 40.5  | -1.6  |
| Oracle 17                       | 255   | 87609  | 2.6  | 11.016 | 2   | 3.2054 | 3.4  | 0.2562  | 2.7  | 0.813 | 1470.4 | 35.9   | 1458.5 | 26    | 1441.1 | 37.2  | -2.0  |
| Oracle 18                       | 241   | 349913 | 1.05 | 10.975 | 1.6 | 3.2378 | 3.6  | 0.25783 | 3.2  | 0.893 | 1478.7 | 42.9   | 1466.2 | 28.2  | 1448.2 | 31.1  | -2.1  |
| Oracle 19                       | 291   | 504060 | 0.86 | 11.006 | 1.7 | 3.2135 | 3.2  | 0.25663 | 2.7  | 0.851 | 1472.6 | 36.1   | 1460.4 | 25    | 1442.8 | 32.3  | -2.1  |
| Oracle 2                        | 166   | 140566 | 1.79 | 11.05  | 1.7 | 3.0607 | 3.3  | 0.24541 | 2.8  | 0.853 | 1414.8 | 36.1   | 1422.9 | 25.5  | 1435.1 | 33.2  | 1.4   |
| Oracle 20                       | 227   | 126079 | 1.33 | 11.017 | 1.8 | 3.1972 | 3.4  | 0.25559 | 2.9  | 0.853 | 1467.2 | 37.6   | 1456.5 | 26    | 1440.8 | 33.5  | -1.8  |
| Oracle 21                       | 153   | 115425 | 1.5  | 11.141 | 2.5 | 3.1098 | 3.9  | 0.2514  | 3    | 0.773 | 1445.7 | 39.2   | 1435.1 | 30.1  | 1419.5 | 47.5  | -1.8  |

|                                     |     |        |      |        |     |        |      |         |     |       |        |      |        |      |        |       |      |
|-------------------------------------|-----|--------|------|--------|-----|--------|------|---------|-----|-------|--------|------|--------|------|--------|-------|------|
| Oracle 22                           | 114 | 35759  | 0.9  | 11.119 | 2.8 | 3.2267 | 4.6  | 0.26032 | 3.6 | 0.797 | 1491.5 | 48.4 | 1463.6 | 35.4 | 1423.4 | 52.8  | -4.8 |
| Oracle 23                           | 155 | 121660 | 2.08 | 10.851 | 2   | 3.2727 | 3.2  | 0.25767 | 2.5 | 0.784 | 1477.9 | 32.7 | 1474.6 | 24.6 | 1469.8 | 37.3  | -0.6 |
| Oracle 24                           | 163 | 167415 | 1.18 | 11.15  | 2   | 3.0081 | 4.1  | 0.24337 | 3.6 | 0.88  | 1404.2 | 46   | 1409.7 | 31.6 | 1418   | 37.6  | 1.0  |
| Oracle 25                           | 103 | 3E+06  | 0.51 | 11.098 | 3   | 3.0377 | 4.8  | 0.24461 | 3.8 | 0.779 | 1410.6 | 47.5 | 1417.1 | 36.8 | 1426.9 | 57.6  | 1.1  |
| Oracle 26                           | 677 | 169703 | 2.08 | 10.955 | 1.8 | 3.0651 | 2.7  | 0.24363 | 2   | 0.741 | 1405.5 | 25.4 | 1424   | 20.8 | 1451.7 | 34.8  | 3.2  |
| Oracle 27                           | 216 | 214142 | 0.91 | 10.956 | 1.7 | 3.077  | 2.7  | 0.24461 | 2.1 | 0.769 | 1410.6 | 26.6 | 1427   | 20.9 | 1451.5 | 33.2  | 2.8  |
| Oracle 28                           | 781 | 582142 | 4.81 | 10.898 | 1.6 | 3.1552 | 2.7  | 0.2495  | 2.1 | 0.798 | 1435.9 | 27.3 | 1446.3 | 20.5 | 1461.6 | 30.4  | 1.8  |
| Oracle 29                           | 586 | 696608 | 0.45 | 10.947 | 1.8 | 3.164  | 2.7  | 0.25131 | 2.1 | 0.757 | 1445.2 | 26.8 | 1448.4 | 21.1 | 1453.1 | 34    | 0.5  |
| Oracle 3                            | 349 | 358709 | 1.32 | 10.898 | 2.2 | 3.1691 | 3.6  | 0.25059 | 2.9 | 0.792 | 1441.5 | 37.1 | 1449.7 | 28   | 1461.6 | 42.1  | 1.4  |
| Oracle 30                           | 227 | 122325 | 0.85 | 11.066 | 2.1 | 3.2653 | 3.5  | 0.26218 | 2.9 | 0.814 | 1501   | 38.6 | 1472.8 | 27.5 | 1432.4 | 39.3  | -4.8 |
| Oracle 4                            | 279 | 58934  | 1.74 | 11.039 | 1.7 | 3.1136 | 2.7  | 0.2494  | 2.1 | 0.773 | 1435.4 | 26.9 | 1436   | 20.8 | 1437   | 32.7  | 0.1  |
| Oracle 5                            | 269 | 1E+06  | 1.88 | 10.924 | 2   | 3.1345 | 3.3  | 0.24846 | 2.6 | 0.798 | 1430.5 | 33.5 | 1441.2 | 25.2 | 1457   | 37.5  | 1.8  |
| Oracle 6                            | 178 | 441963 | 2.2  | 10.994 | 2.1 | 3.1279 | 4.1  | 0.24951 | 3.6 | 0.864 | 1435.9 | 45.8 | 1439.6 | 31.7 | 1444.9 | 39.5  | 0.6  |
| Oracle 7                            | 313 | 300360 | 5.01 | 11.067 | 1.9 | 3.1418 | 2.9  | 0.25229 | 2.2 | 0.747 | 1450.3 | 28.1 | 1443   | 22.3 | 1432.3 | 36.7  | -1.3 |
| Oracle 8                            | 337 | 2E+06  | 2.32 | 10.957 | 1.5 | 3.1219 | 2.6  | 0.2482  | 2.1 | 0.82  | 1429.2 | 27.1 | 1438.1 | 19.9 | 1451.3 | 28.2  | 1.5  |
| Oracle 9                            | 127 | 168937 | 1.42 | 11.135 | 1.9 | 3.1707 | 3.8  | 0.25618 | 3.2 | 0.863 | 1470.2 | 42.6 | 1450.1 | 29   | 1420.6 | 36.2  | -3.5 |
| <b>Oracle CA Run 2 (discordant)</b> |     |        |      |        |     |        |      |         |     |       |        |      |        |      |        |       |      |
| Oracle 1                            | 17  | 5000   | 1.15 | 14.5   | 8.7 | 1.4205 | 11.1 | 0.14945 | 7   | 0.628 | 897.9  | 58.6 | 897.6  | 66.3 | 896.8  | 178.6 | -0.1 |
