# Supplementary material for: Increased accuracy and precision in igneous and detrital zircon geochronology using CA-LA-ICPMS
Source: Copernicus journal article supplement (doi:10.5194/gchron-2023-20), 2023-08-25
Supplement: Supplementary file 28 [file gchron-2023-20-supplement.zip]

**TABLE S16: RORA MED (no CA) LA-ICPMS U-Pb ZIRCON GEOCHRONOLOGY**

| Zircon #     | Composition |             |      |             |                |            |                |            |                |             | Ages       |                 |            |                 |             |                 |         |
|--------------|-------------|-------------|------|-------------|----------------|------------|----------------|------------|----------------|-------------|------------|-----------------|------------|-----------------|-------------|-----------------|---------|
|              | U (ppm)     | 206Pb/204Pb | U/Th | 206Pb/207Pb | 1 $\sigma$ (%) | 207Pb/235U | 1 $\sigma$ (%) | 206Pb/238U | 1 $\sigma$ (%) | Error Corr. | 206Pb/238U | 1 $\sigma$ (Ma) | 207Pb/235U | 1 $\sigma$ (Ma) | 206Pb/207Pb | 1 $\sigma$ (Ma) | % Disc. |
| <b>Run 1</b> |             |             |      |             |                |            |                |            |                |             |            |                 |            |                 |             |                 |         |
| Spot 1       | 66          | 557130.4    | 2.7  | 5.4         | 0.6            | 13.0       | 0.9            | 0.5        | 0.6            | 0.73533     | 2684.0     | 14.0            | 2676.1     | 8.2             | 2670.1      | 9.7             | -0.5    |
| Spot 2       | 88          | 55112.8     | 2.1  | 7.2         | 0.8            | 8.0        | 1.2            | 0.4        | 0.9            | 0.76018     | 2269.3     | 16.8            | 2233.7     | 10.5            | 2201.3      | 13.1            | -3.1    |
| Spot 3       | 101         | 63918.7     | 4.8  | 7.7         | 0.6            | 6.7        | 1.1            | 0.4        | 1.0            | 0.83493     | 2076.4     | 17.0            | 2075.5     | 10.1            | 2074.4      | 11.1            | -0.1    |
| Spot 4       | 38          | 212666.7    | 2.8  | 6.8         | 0.9            | 8.7        | 1.2            | 0.4        | 0.8            | 0.69403     | 2326.0     | 16.3            | 2309.8     | 11.0            | 2295.5      | 14.9            | -1.3    |
| Spot 5       | 72          | 301097.5    | 1.2  | 4.5         | 0.6            | 18.2       | 1.2            | 0.6        | 1.0            | 0.84839     | 3023.7     | 24.9            | 3002.5     | 11.7            | 2988.3      | 10.4            | -1.2    |
| Spot 6       | 100         | 94037.6     | 2.3  | 8.5         | 0.8            | 5.5        | 1.6            | 0.3        | 1.4            | 0.86922     | 1919.1     | 23.4            | 1905.2     | 14.0            | 1890.1      | 14.4            | -1.5    |
| Spot 7       | 79          | 111580.5    | 1.2  | 7.7         | 0.5            | 6.9        | 0.8            | 0.4        | 0.6            | 0.81443     | 2123.8     | 11.7            | 2103.9     | 7.1             | 2084.4      | 8.1             | -1.9    |
| Spot 8       | 62          | 993476.9    | 1.7  | 5.8         | 0.7            | 11.6       | 1.2            | 0.5        | 0.9            | 0.80819     | 2571.7     | 20.1            | 2571.2     | 11.0            | 2570.7      | 11.5            | 0.0     |
| Spot 9       | 86          | 44164.6     | 2.6  | 5.4         | 0.5            | 13.1       | 1.0            | 0.5        | 0.8            | 0.84611     | 2688.0     | 18.6            | 2686.3     | 9.4             | 2685.0      | 8.8             | -0.1    |
| Spot 10      | 87          | 4890.5      | 2.5  | 6.6         | 1.8            | 7.3        | 2.0            | 0.4        | 0.9            | 0.42442     | 1992.0     | 14.6            | 2152.3     | 17.9            | 2308.9      | 31.2            | 13.7    |
| Spot 12      | 84          | 109507.3    | 9.8  | 7.6         | 0.7            | 7.0        | 1.2            | 0.4        | 1.0            | 0.82965     | 2129.7     | 18.1            | 2113.1     | 10.7            | 2096.9      | 11.8            | -1.6    |
| Spot 13      | 23          | 108530.3    | 1.8  | 8.2         | 0.7            | 6.1        | 1.4            | 0.4        | 1.2            | 0.88025     | 2003.1     | 20.9            | 1986.4     | 12.0            | 1969.1      | 11.7            | -1.7    |
| Spot 14      | 52          | 171255.3    | 2.7  | 5.4         | 0.6            | 13.3       | 1.1            | 0.5        | 0.9            | 0.80499     | 2725.6     | 19.5            | 2700.3     | 10.3            | 2681.4      | 10.7            | -1.6    |
| Spot 15      | 31          | 16995.1     | 2.1  | 5.0         | 0.7            | 14.5       | 1.1            | 0.5        | 0.8            | 0.72660     | 2755.9     | 17.2            | 2784.1     | 10.0            | 2804.6      | 11.9            | 1.7     |
| Spot 16      | 65          | 131048.5    | 1.6  | 8.4         | 0.7            | 5.5        | 1.1            | 0.3        | 0.8            | 0.77097     | 1881.1     | 13.6            | 1901.7     | 9.3             | 1924.3      | 12.3            | 2.2     |
| Spot 17      | 91          | 117008.2    | 2.3  | 5.5         | 0.5            | 13.1       | 1.0            | 0.5        | 0.9            | 0.88083     | 2718.1     | 20.3            | 2687.2     | 9.8             | 2664.1      | 8.1             | -2.0    |
| Spot 18      | 43          | 11798.0     | 1.7  | 6.2         | 1.4            | 9.0        | 1.9            | 0.4        | 1.2            | 0.65993     | 2227.6     | 23.2            | 2336.0     | 17.1            | 2432.1      | 23.8            | 8.4     |
| Spot 19      | 112         | 101482.7    | 2.6  | 5.4         | 0.6            | 13.1       | 1.2            | 0.5        | 1.1            | 0.85759     | 2698.2     | 23.4            | 2688.9     | 11.7            | 2681.8      | 10.5            | -0.6    |
| Spot 21      | 99          | 11946.7     | 1.2  | 5.9         | 0.4            | 10.6       | 0.8            | 0.5        | 0.7            | 0.85343     | 2456.5     | 14.2            | 2492.5     | 7.6             | 2521.9      | 7.1             | 2.6     |
| Spot 22      | 99          | 359902.8    | 1.5  | 4.2         | 0.7            | 19.8       | 1.2            | 0.6        | 0.9            | 0.81080     | 3036.0     | 22.6            | 3079.2     | 11.1            | 3107.5      | 10.7            | 2.3     |
| Spot 23      | 90          | 115853.2    | 4.8  | 7.7         | 0.8            | 6.8        | 1.2            | 0.4        | 0.9            | 0.74678     | 2110.7     | 15.7            | 2091.4     | 10.4            | 2072.4      | 13.7            | -1.8    |
| Spot 24      | 82          | 47904.1     | 1.0  | 8.5         | 0.5            | 5.7        | 0.8            | 0.4        | 0.7            | 0.80554     | 1963.2     | 11.3            | 1936.1     | 7.1             | 1907.1      | 8.8             | -2.9    |
| Spot 25      | 65          | 572828.8    | 1.8  | 7.5         | 0.7            | 7.0        | 1.2            | 0.4        | 1.0            | 0.82156     | 2105.5     | 17.8            | 2109.3     | 10.7            | 2113.0      | 12.0            | 0.4     |
| Spot 26      | 98          | 11677.7     | 1.6  | 6.4         | 2.1            | 9.0        | 2.3            | 0.4        | 1.0            | 0.43934     | 2282.8     | 19.5            | 2341.7     | 21.1            | 2393.4      | 35.3            | 4.6     |
| Spot 27      | 61          | 104061.7    | 4.9  | 5.0         | 0.7            | 15.3       | 1.2            | 0.6        | 1.0            | 0.83524     | 2865.7     | 23.1            | 2831.9     | 11.4            | 2808.0      | 10.7            | -2.1    |
| Spot 28      | 111         | 268683.8    | 2.3  | 8.5         | 0.5            | 5.5        | 1.0            | 0.3        | 0.8            | 0.85605     | 1904.9     | 13.6            | 1897.6     | 8.3             | 1889.6      | 8.9             | -0.8    |
| Spot 29      | 44          | 77117.8     | 2.4  | 6.3         | 0.7            | 10.1       | 1.1            | 0.5        | 0.8            | 0.73857     | 2467.8     | 16.8            | 2446.4     | 10.2            | 2428.7      | 12.6            | -1.6    |
| Spot 30      | 74          | 42400.4     | 2.0  | 5.2         | 0.6            | 14.3       | 1.0            | 0.5        | 0.9            | 0.83127     | 2806.0     | 19.6            | 2769.1     | 9.8             | 2742.3      | 9.4             | -2.3    |
| Spot 31      | 76          | 96960.7     | 2.1  | 8.5         | 0.7            | 5.5        | 1.1            | 0.3        | 0.8            | 0.77060     | 1905.2     | 13.7            | 1901.2     | 9.3             | 1896.9      | 12.3            | -0.4    |
| Spot 32      | 69          | 63409.3     | 1.7  | 7.4         | 0.6            | 7.2        | 1.1            | 0.4        | 1.0            | 0.87066     | 2139.0     | 17.7            | 2138.6     | 10.0            | 2138.2      | 9.6             | 0.0     |
| Spot 33      | 78          | 95249.2     | 2.3  | 8.5         | 0.7            | 5.5        | 1.1            | 0.3        | 0.9            | 0.81725     | 1916.7     | 15.6            | 1904.2     | 9.9             | 1890.5      | 11.9            | -1.4    |
| Spot 34      | 82          | 130576.9    | 1.8  | 8.5         | 0.9            | 5.4        | 1.1            | 0.3        | 0.7            | 0.65319     | 1893.1     | 12.1            | 1891.3     | 9.7             | 1889.3      | 15.4            | -0.2    |
| Spot 35      | 69          | 150712.3    | 1.6  | 5.3         | 0.7            | 13.7       | 1.3            | 0.5        | 1.1            | 0.83809     | 2765.3     | 24.5            | 2726.2     | 12.3            | 2697.4      | 11.7            | -2.5    |
| Spot 36      | 82          | 115295.5    | 1.5  | 7.5         | 0.6            | 7.3        | 1.3            | 0.4        | 1.2            | 0.88407     | 2171.3     | 21.7            | 2150.6     | 11.9            | 2130.9      | 10.9            | -1.9    |
| Spot 37      | 115         | 91268.9     | 2.1  | 7.8         | 0.5            | 6.6        | 1.3            | 0.4        | 1.2            | 0.91230     | 2060.9     | 21.5            | 2057.7     | 11.8            | 2054.5      | 9.7             | -0.3    |
| Spot 38      | 91          | 208410.3    | 2.1  | 5.4         | 0.6            | 13.1       | 1.2            | 0.5        | 1.0            | 0.83367     | 2703.9     | 21.2            | 2688.8     | 10.9            | 2677.5      | 10.5            | -1.0    |
| Spot 39      | 57          | 67174.3     | 2.8  | 7.6         | 0.7            | 7.2        | 1.1            | 0.4        | 0.9            | 0.77331     | 2162.9     | 16.1            | 2133.8     | 10.1            | 2105.9      | 12.6            | -2.7    |
| Spot 40      | 41          | 123839.6    | 1.6  | 6.9         | 0.8            | 8.3        | 1.4            | 0.4        | 1.1            | 0.83408     | 2268.6     | 22.0            | 2263.9     | 12.5            | 2259.7      | 13.1            | -0.4    |

|         |     |           |     |     |     |      |     |     |     |         |        |      |        |      |        |      |      |
|---------|-----|-----------|-----|-----|-----|------|-----|-----|-----|---------|--------|------|--------|------|--------|------|------|
| Spot 42 | 98  | 58829.6   | 1.5 | 8.4 | 0.6 | 5.0  | 0.8 | 0.3 | 0.6 | 0.74214 | 1733.4 | 9.6  | 1821.0 | 7.2  | 1922.6 | 10.2 | 9.8  |
| Spot 43 | 85  | 124452.3  | 3.2 | 5.4 | 0.6 | 13.0 | 1.1 | 0.5 | 0.8 | 0.79634 | 2681.9 | 18.4 | 2680.9 | 9.9  | 2680.1 | 10.5 | -0.1 |
| Spot 44 | 47  | 844519.9  | 2.7 | 7.1 | 0.7 | 7.9  | 1.1 | 0.4 | 0.9 | 0.81143 | 2215.5 | 17.3 | 2216.6 | 10.3 | 2217.6 | 11.5 | 0.1  |
| Spot 45 | 86  | 51912.8   | 3.3 | 7.5 | 0.4 | 6.9  | 0.8 | 0.4 | 0.7 | 0.85035 | 2074.7 | 12.6 | 2100.5 | 7.4  | 2125.9 | 7.7  | 2.4  |
| Spot 46 | 85  | 348745.7  | 2.3 | 5.5 | 0.7 | 13.1 | 1.2 | 0.5 | 0.9 | 0.81706 | 2725.3 | 20.9 | 2689.7 | 10.9 | 2663.0 | 11.0 | -2.3 |
| Spot 47 | 46  | 27681.5   | 1.6 | 7.9 | 0.6 | 6.1  | 0.9 | 0.4 | 0.7 | 0.76866 | 1960.1 | 11.7 | 1994.1 | 7.8  | 2029.6 | 10.2 | 3.4  |
| Spot 48 | 103 | 53417.8   | 1.9 | 8.4 | 0.7 | 5.5  | 1.2 | 0.3 | 1.0 | 0.81522 | 1887.8 | 15.6 | 1903.5 | 10.0 | 1920.7 | 12.1 | 1.7  |
| Spot 49 | 98  | 47930.4   | 2.6 | 5.4 | 0.7 | 12.3 | 1.3 | 0.5 | 1.1 | 0.85347 | 2543.6 | 23.2 | 2625.7 | 12.1 | 2689.6 | 11.1 | 5.4  |
| Spot 50 | 100 | 125583.1  | 2.4 | 5.4 | 0.6 | 13.2 | 1.1 | 0.5 | 0.9 | 0.83309 | 2697.7 | 19.7 | 2697.3 | 10.1 | 2697.1 | 9.8  | 0.0  |
| Spot 51 | 28  | 96405.1   | 2.1 | 7.5 | 0.7 | 7.4  | 1.1 | 0.4 | 0.9 | 0.78294 | 2192.7 | 16.6 | 2163.0 | 10.2 | 2134.9 | 12.4 | -2.7 |
| Spot 52 | 97  | 113691.8  | 1.7 | 7.3 | 0.8 | 7.4  | 1.2 | 0.4 | 0.9 | 0.76113 | 2163.1 | 17.0 | 2163.7 | 10.9 | 2164.3 | 13.7 | 0.1  |
| Spot 53 | 80  | 237615.1  | 2.4 | 5.1 | 0.7 | 14.7 | 1.3 | 0.5 | 1.1 | 0.82796 | 2809.0 | 24.3 | 2798.2 | 12.3 | 2790.4 | 11.8 | -0.7 |
| Spot 54 | 21  | 18029.5   | 1.9 | 6.8 | 0.9 | 7.9  | 1.4 | 0.4 | 1.0 | 0.73949 | 2138.8 | 18.7 | 2218.1 | 12.5 | 2292.2 | 16.1 | 6.7  |
| Spot 55 | 34  | 1755688.2 | 1.9 | 7.6 | 0.7 | 7.0  | 1.1 | 0.4 | 0.9 | 0.77502 | 2127.1 | 15.6 | 2113.9 | 9.9  | 2101.2 | 12.3 | -1.2 |
| Spot 56 | 94  | 168149.6  | 2.4 | 5.4 | 0.7 | 12.8 | 1.2 | 0.5 | 1.0 | 0.82273 | 2647.4 | 20.6 | 2667.0 | 10.9 | 2681.9 | 10.9 | 1.3  |
| Spot 57 | 91  | 32792.2   | 1.1 | 7.4 | 0.5 | 7.2  | 1.1 | 0.4 | 0.9 | 0.88541 | 2113.6 | 16.9 | 2134.4 | 9.5  | 2154.5 | 8.6  | 1.9  |
| Spot 58 | 131 | 219471.8  | 1.8 | 8.4 | 0.6 | 5.6  | 1.0 | 0.3 | 0.8 | 0.83836 | 1898.7 | 14.0 | 1914.0 | 8.7  | 1930.6 | 9.9  | 1.7  |
| Spot 59 | 79  | 205143.1  | 3.1 | 4.9 | 0.7 | 15.3 | 1.2 | 0.5 | 0.9 | 0.80386 | 2821.9 | 21.3 | 2835.5 | 11.0 | 2845.2 | 11.2 | 0.8  |
| Spot 60 | 74  | 44239.3   | 1.2 | 6.1 | 0.7 | 10.4 | 1.0 | 0.5 | 0.8 | 0.76440 | 2447.6 | 15.9 | 2468.8 | 9.5  | 2486.4 | 11.1 | 1.6  |
| Spot 61 | 57  | 174010.6  | 1.3 | 7.8 | 0.7 | 6.6  | 1.1 | 0.4 | 0.9 | 0.80536 | 2064.6 | 16.2 | 2056.8 | 10.0 | 2048.9 | 11.9 | -0.8 |
| Spot 62 | 49  | 23585.0   | 2.3 | 7.1 | 0.7 | 7.5  | 1.1 | 0.4 | 0.9 | 0.77867 | 2109.2 | 16.0 | 2168.9 | 10.3 | 2225.9 | 12.4 | 5.2  |
| Spot 63 | 138 | 54497.0   | 2.4 | 8.3 | 0.6 | 5.4  | 1.0 | 0.3 | 0.8 | 0.80929 | 1841.2 | 12.4 | 1890.2 | 8.2  | 1944.5 | 10.1 | 5.3  |
| Spot 64 | 50  | 98395.8   | 4.6 | 7.0 | 0.8 | 8.1  | 1.2 | 0.4 | 1.0 | 0.77485 | 2241.8 | 18.0 | 2239.8 | 11.1 | 2238.0 | 13.4 | -0.2 |
| Spot 65 | 88  | 80670.4   | 3.8 | 7.6 | 0.7 | 6.9  | 1.2 | 0.4 | 0.9 | 0.78709 | 2080.9 | 16.5 | 2093.7 | 10.4 | 2106.3 | 12.7 | 1.2  |
| Spot 66 | 39  | 237287.9  | 1.0 | 8.6 | 0.8 | 5.5  | 1.2 | 0.3 | 0.9 | 0.77873 | 1913.3 | 15.7 | 1896.3 | 10.5 | 1877.8 | 13.8 | -1.9 |
| Spot 67 | 139 | 397941.8  | 1.4 | 7.7 | 0.7 | 6.8  | 1.2 | 0.4 | 1.0 | 0.82532 | 2082.2 | 17.6 | 2085.7 | 10.6 | 2089.3 | 11.9 | 0.3  |
| Spot 68 | 88  | 6936.9    | 2.4 | 7.3 | 1.5 | 6.4  | 1.7 | 0.3 | 0.8 | 0.46700 | 1933.1 | 12.9 | 2034.5 | 14.5 | 2138.9 | 25.6 | 9.6  |
| Spot 69 | 34  | 121762.2  | 1.8 | 8.2 | 0.8 | 6.1  | 1.2 | 0.4 | 0.9 | 0.77312 | 2004.2 | 16.1 | 1988.3 | 10.5 | 1971.8 | 13.6 | -1.6 |
| Spot 70 | 86  | 1115656.2 | 1.9 | 7.4 | 0.7 | 7.4  | 1.1 | 0.4 | 0.8 | 0.75148 | 2162.0 | 14.9 | 2155.8 | 9.6  | 2150.0 | 12.4 | -0.6 |
| Spot 71 | 110 | 96429.2   | 2.3 | 5.4 | 0.8 | 12.4 | 1.4 | 0.5 | 1.2 | 0.82832 | 2579.2 | 24.7 | 2635.2 | 13.2 | 2678.6 | 13.0 | 3.7  |
| Spot 72 | 118 | 111739.9  | 3.8 | 7.2 | 0.5 | 7.8  | 1.0 | 0.4 | 0.9 | 0.88238 | 2213.8 | 16.4 | 2208.6 | 8.9  | 2203.7 | 8.1  | -0.5 |
| Spot 73 | 41  | 124311.1  | 1.8 | 7.5 | 0.7 | 7.0  | 1.1 | 0.4 | 0.9 | 0.80427 | 2118.2 | 15.9 | 2117.3 | 9.8  | 2116.4 | 11.4 | -0.1 |
| Spot 74 | 79  | 162915.8  | 2.5 | 5.6 | 0.8 | 11.9 | 1.3 | 0.5 | 1.0 | 0.80505 | 2561.6 | 22.2 | 2596.5 | 12.2 | 2623.8 | 12.9 | 2.4  |
| Spot 75 | 53  | 95048.8   | 4.3 | 7.1 | 0.6 | 7.7  | 1.3 | 0.4 | 1.1 | 0.89014 | 2189.9 | 21.2 | 2201.3 | 11.5 | 2211.8 | 10.1 | 1.0  |
| Spot 76 | 164 | 13732.5   | 1.4 | 7.7 | 2.1 | 5.1  | 3.2 | 0.3 | 2.4 | 0.75139 | 1651.6 | 35.5 | 1839.4 | 27.5 | 2059.1 | 37.8 | 19.8 |
| Spot 77 | 89  | 111675.3  | 2.6 | 8.6 | 0.6 | 5.4  | 1.2 | 0.3 | 1.1 | 0.86543 | 1889.9 | 17.3 | 1881.6 | 10.4 | 1872.4 | 11.0 | -0.9 |
| Spot 78 | 120 | 90144.3   | 3.7 | 7.5 | 0.6 | 6.5  | 1.4 | 0.4 | 1.2 | 0.90382 | 1971.2 | 21.2 | 2042.6 | 12.2 | 2115.5 | 10.4 | 6.8  |
| Spot 79 | 63  | 105703.1  | 5.8 | 7.4 | 0.7 | 7.2  | 1.2 | 0.4 | 0.9 | 0.81473 | 2137.3 | 17.2 | 2139.5 | 10.3 | 2141.7 | 11.8 | 0.2  |
| Spot 80 | 121 | 9868.6    | 2.5 | 6.6 | 0.8 | 7.1  | 1.1 | 0.3 | 0.9 | 0.74590 | 1895.4 | 14.0 | 2118.6 | 10.1 | 2342.8 | 13.0 | 19.1 |
| Spot 81 | 69  | 46271.5   | 0.9 | 8.1 | 0.7 | 6.2  | 1.1 | 0.4 | 0.9 | 0.80417 | 2024.7 | 15.7 | 2004.4 | 9.8  | 1983.5 | 11.9 | -2.1 |
| Spot 82 | 18  | 98484.2   | 2.0 | 7.2 | 0.8 | 7.7  | 1.4 | 0.4 | 1.2 | 0.82592 | 2195.2 | 21.9 | 2192.1 | 12.8 | 2189.1 | 13.9 | -0.3 |
| Spot 83 | 106 | 113751.0  | 2.0 | 8.4 | 0.7 | 5.2  | 1.2 | 0.3 | 1.0 | 0.84223 | 1800.8 | 16.4 | 1854.4 | 10.5 | 1914.9 | 12.0 | 6.0  |
| Spot 84 | 82  | 576089.2  | 1.9 | 7.9 | 0.6 | 6.6  | 1.1 | 0.4 | 0.9 | 0.82970 | 2072.9 | 16.5 | 2053.5 | 9.9  | 2034.0 | 11.1 | -1.9 |

|          |     |           |     |     |     |      |     |     |     |         |        |      |        |      |        |      |      |
|----------|-----|-----------|-----|-----|-----|------|-----|-----|-----|---------|--------|------|--------|------|--------|------|------|
| Spot 85  | 27  | 36395.3   | 3.3 | 7.5 | 0.8 | 7.3  | 1.2 | 0.4 | 0.9 | 0.77843 | 2159.1 | 17.2 | 2143.8 | 10.7 | 2129.1 | 13.2 | -1.4 |
| Spot 86  | 127 | 137051.1  | 2.2 | 7.6 | 0.6 | 7.1  | 1.1 | 0.4 | 1.0 | 0.85855 | 2142.6 | 17.7 | 2127.3 | 10.1 | 2112.6 | 10.2 | -1.4 |
| Spot 87  | 18  | 3671512.4 | 2.9 | 6.2 | 0.8 | 10.5 | 1.4 | 0.5 | 1.1 | 0.80469 | 2500.4 | 23.8 | 2477.3 | 13.2 | 2458.4 | 14.3 | -1.7 |
| Spot 88  | 96  | 24082.2   | 1.6 | 8.2 | 0.8 | 5.6  | 1.2 | 0.3 | 0.8 | 0.69063 | 1865.6 | 13.0 | 1913.2 | 10.0 | 1965.3 | 15.0 | 5.1  |
| Spot 89  | 96  | 16038.3   | 1.8 | 8.0 | 0.5 | 6.0  | 1.0 | 0.4 | 0.8 | 0.85124 | 1941.2 | 13.6 | 1973.6 | 8.3  | 2007.6 | 8.9  | 3.3  |
| Spot 90  | 149 | 1284527.9 | 2.4 | 7.2 | 0.6 | 7.7  | 1.2 | 0.4 | 1.0 | 0.85540 | 2194.5 | 18.9 | 2200.6 | 10.7 | 2206.2 | 10.7 | 0.5  |
| Spot 91  | 109 | 20613.9   | 1.8 | 7.0 | 0.8 | 8.0  | 1.5 | 0.4 | 1.2 | 0.84084 | 2229.9 | 23.2 | 2231.7 | 13.2 | 2233.3 | 13.7 | 0.2  |
| Spot 92  | 126 | 239659.9  | 2.3 | 5.4 | 0.7 | 12.9 | 1.3 | 0.5 | 1.1 | 0.85220 | 2673.3 | 23.5 | 2673.5 | 11.9 | 2673.6 | 10.9 | 0.0  |
| Spot 93  | 145 | 24232.4   | 1.3 | 8.2 | 1.0 | 5.5  | 1.3 | 0.3 | 0.9 | 0.67517 | 1837.4 | 14.1 | 1900.3 | 11.2 | 1969.8 | 17.1 | 6.7  |
| Spot 94  | 104 | 262372.7  | 3.8 | 5.0 | 0.6 | 14.9 | 1.2 | 0.5 | 1.1 | 0.88868 | 2817.3 | 25.1 | 2807.1 | 11.8 | 2799.7 | 9.3  | -0.6 |
| Spot 95  | 98  | 165091.8  | 3.0 | 8.5 | 0.7 | 5.4  | 1.3 | 0.3 | 1.1 | 0.84752 | 1878.9 | 18.2 | 1892.2 | 11.3 | 1906.8 | 12.6 | 1.5  |
| Spot 96  | 104 | 251435.0  | 1.5 | 7.5 | 0.4 | 7.2  | 0.9 | 0.4 | 0.8 | 0.86934 | 2151.0 | 14.2 | 2137.6 | 8.0  | 2124.8 | 7.8  | -1.2 |
| Spot 97  | 164 | 168284.5  | 1.9 | 5.4 | 0.6 | 13.0 | 1.2 | 0.5 | 1.0 | 0.87431 | 2679.2 | 22.9 | 2676.8 | 11.3 | 2675.0 | 9.6  | -0.2 |
| Spot 98  | 127 | 5251140.1 | 3.6 | 7.5 | 0.6 | 7.0  | 1.2 | 0.4 | 1.0 | 0.83755 | 2108.2 | 17.8 | 2114.9 | 10.5 | 2121.4 | 11.3 | 0.6  |
| Spot 99  | 47  | 100806.9  | 3.2 | 7.5 | 0.7 | 7.4  | 1.3 | 0.4 | 1.1 | 0.84598 | 2205.1 | 20.8 | 2159.3 | 11.8 | 2116.1 | 12.3 | -4.2 |
| Spot 100 | 133 | 100555.4  | 2.8 | 5.8 | 0.5 | 11.4 | 1.3 | 0.5 | 1.2 | 0.92625 | 2534.5 | 24.8 | 2554.5 | 11.9 | 2570.4 | 8.1  | 1.4  |
| Spot 101 | 92  | 29924.7   | 1.3 | 8.3 | 0.5 | 5.7  | 1.0 | 0.3 | 0.8 | 0.85725 | 1926.1 | 13.7 | 1931.2 | 8.3  | 1936.7 | 8.8  | 0.6  |
| Spot 102 | 153 | 49211.1   | 1.2 | 8.3 | 0.7 | 5.6  | 1.3 | 0.3 | 1.0 | 0.81848 | 1881.2 | 17.0 | 1910.1 | 11.0 | 1941.8 | 13.1 | 3.1  |
| Spot 103 | 50  | 57884.5   | 1.1 | 8.0 | 0.7 | 6.4  | 1.1 | 0.4 | 0.9 | 0.78636 | 2047.6 | 15.0 | 2030.4 | 9.5  | 2012.8 | 11.9 | -1.7 |
| Spot 104 | 67  | 59791.6   | 1.7 | 8.5 | 0.6 | 5.5  | 1.0 | 0.3 | 0.8 | 0.82546 | 1890.6 | 13.6 | 1897.8 | 8.6  | 1905.6 | 10.2 | 0.8  |
| Spot 105 | 91  | 86023.9   | 1.2 | 5.0 | 0.5 | 14.8 | 1.1 | 0.5 | 0.9 | 0.87189 | 2808.5 | 21.2 | 2804.7 | 10.2 | 2801.9 | 8.6  | -0.2 |
| Spot 106 | 92  | 98415.2   | 1.8 | 8.2 | 0.6 | 5.8  | 1.2 | 0.3 | 1.1 | 0.87050 | 1930.9 | 18.1 | 1944.1 | 10.8 | 1958.2 | 11.0 | 1.4  |
| Spot 107 | 59  | 152437.7  | 2.2 | 8.5 | 0.8 | 5.6  | 1.2 | 0.3 | 0.9 | 0.76072 | 1927.5 | 15.8 | 1919.8 | 10.8 | 1911.4 | 14.5 | -0.8 |
| Spot 108 | 57  | 152464.8  | 3.1 | 5.5 | 0.5 | 13.1 | 1.0 | 0.5 | 0.8 | 0.85546 | 2717.5 | 18.7 | 2687.4 | 9.3  | 2664.9 | 8.4  | -2.0 |
| Spot 109 | 28  | 109488.7  | 1.9 | 6.9 | 0.7 | 8.6  | 1.3 | 0.4 | 1.1 | 0.84926 | 2328.2 | 20.8 | 2293.5 | 11.4 | 2262.7 | 11.4 | -2.9 |
| Spot 110 | 103 | 196264.1  | 1.5 | 8.5 | 0.5 | 5.4  | 0.9 | 0.3 | 0.7 | 0.78417 | 1880.8 | 11.0 | 1890.5 | 7.3  | 1901.3 | 9.6  | 1.1  |
| Spot 111 | 111 | 86595.5   | 2.0 | 8.6 | 0.6 | 5.1  | 1.2 | 0.3 | 1.1 | 0.88929 | 1787.9 | 16.8 | 1835.7 | 10.3 | 1890.3 | 10.0 | 5.4  |
| Spot 112 | 107 | 103478.7  | 0.8 | 8.1 | 0.5 | 6.1  | 1.1 | 0.4 | 1.0 | 0.89044 | 2001.8 | 16.6 | 1995.8 | 9.4  | 1989.7 | 8.7  | -0.6 |
| Spot 113 | 38  | 676786.2  | 2.0 | 7.0 | 0.7 | 8.3  | 1.1 | 0.4 | 0.9 | 0.77432 | 2275.3 | 16.9 | 2264.0 | 10.3 | 2253.8 | 12.4 | -1.0 |
| Spot 114 | 11  | 66162.0   | 1.7 | 7.4 | 0.8 | 7.4  | 1.1 | 0.4 | 0.8 | 0.73260 | 2158.7 | 15.1 | 2155.8 | 10.1 | 2153.0 | 13.4 | -0.3 |
| Spot 115 | 127 | 89567.1   | 1.6 | 5.3 | 0.6 | 13.3 | 1.9 | 0.5 | 1.8 | 0.95664 | 2682.2 | 40.3 | 2700.8 | 18.1 | 2714.8 | 9.2  | 1.2  |
| Spot 116 | 44  | 39995.3   | 2.4 | 4.9 | 0.5 | 16.0 | 0.9 | 0.6 | 0.8 | 0.81687 | 2909.3 | 18.0 | 2875.2 | 9.0  | 2851.4 | 8.8  | -2.0 |
| Spot 117 | 44  | 4937.1    | 3.4 | 6.3 | 1.0 | 9.2  | 1.5 | 0.4 | 1.1 | 0.71386 | 2287.6 | 20.3 | 2354.2 | 13.5 | 2412.3 | 17.6 | 5.2  |
| Spot 118 | 54  | 891907.7  | 1.9 | 3.7 | 0.5 | 24.2 | 1.2 | 0.7 | 1.1 | 0.92105 | 3268.7 | 28.7 | 3276.2 | 11.9 | 3280.8 | 7.4  | 0.4  |
| Spot 119 | 114 | 1464158.2 | 2.2 | 8.6 | 0.7 | 5.5  | 1.3 | 0.3 | 1.1 | 0.85511 | 1910.3 | 18.5 | 1901.4 | 11.3 | 1891.7 | 12.2 | -1.0 |
| Spot 120 | 94  | 85408.8   | 2.6 | 8.4 | 0.7 | 5.6  | 1.2 | 0.3 | 1.0 | 0.83844 | 1910.9 | 17.3 | 1917.6 | 10.8 | 1924.9 | 12.2 | 0.7  |
| Spot 121 | 145 | 1051065.6 | 3.8 | 5.5 | 0.6 | 12.7 | 1.2 | 0.5 | 1.1 | 0.89257 | 2652.1 | 24.0 | 2661.1 | 11.6 | 2667.9 | 9.2  | 0.6  |
| Spot 122 | 82  | 320874.3  | 1.2 | 7.8 | 0.5 | 6.9  | 1.0 | 0.4 | 0.9 | 0.85317 | 2149.8 | 15.6 | 2101.7 | 8.9  | 2055.0 | 9.2  | -4.6 |
| Spot 123 | 57  | 1694433.4 | 1.5 | 5.3 | 0.6 | 13.7 | 1.1 | 0.5 | 0.9 | 0.82330 | 2753.8 | 21.1 | 2727.3 | 10.8 | 2707.6 | 10.7 | -1.7 |
| Spot 124 | 93  | 1244340.7 | 2.8 | 5.4 | 0.7 | 12.9 | 1.2 | 0.5 | 1.0 | 0.82589 | 2678.6 | 21.7 | 2674.1 | 11.3 | 2670.6 | 11.2 | -0.3 |
| Spot 125 | 76  | 66735.9   | 1.0 | 8.5 | 0.5 | 5.4  | 1.0 | 0.3 | 0.8 | 0.84011 | 1852.8 | 13.2 | 1878.3 | 8.3  | 1906.5 | 9.5  | 2.8  |
| Spot 126 | 109 | 9410.4    | 2.8 | 6.0 | 0.7 | 9.7  | 1.2 | 0.4 | 0.9 | 0.79434 | 2293.5 | 17.9 | 2407.8 | 10.8 | 2505.8 | 11.9 | 8.5  |
| Spot 127 | 87  | 92695.5   | 3.1 | 8.5 | 0.6 | 5.6  | 1.1 | 0.3 | 0.9 | 0.83407 | 1926.9 | 14.7 | 1909.5 | 9.1  | 1890.7 | 10.5 | -1.9 |

|          |     |          |      |     |     |      |     |     |     |         |        |      |        |      |        |      |      |
|----------|-----|----------|------|-----|-----|------|-----|-----|-----|---------|--------|------|--------|------|--------|------|------|
| Spot 12  | 31  | 63815.9  | 3.0  | 4.9 | 0.7 | 15.3 | 1.2 | 0.5 | 1.0 | 0.82839 | 2821.3 | 22.7 | 2831.1 | 11.4 | 2838.1 | 10.9 | 0.6  |
| Spot 12  | 61  | 106405.5 | 1.0  | 5.3 | 0.4 | 13.1 | 0.8 | 0.5 | 0.7 | 0.83110 | 2664.9 | 14.2 | 2686.4 | 7.4  | 2702.6 | 7.2  | 1.4  |
| Spot 13  | 181 | 448765.6 | 3.4  | 5.3 | 0.6 | 12.9 | 1.5 | 0.5 | 1.3 | 0.90467 | 2635.8 | 29.1 | 2674.6 | 14.0 | 2704.1 | 10.4 | 2.5  |
| Spot 131 | 137 | 91748.9  | 3.0  | 7.6 | 0.6 | 6.8  | 1.3 | 0.4 | 1.1 | 0.89120 | 2085.8 | 20.3 | 2091.0 | 11.3 | 2096.2 | 10.2 | 0.5  |
| Spot 132 | 49  | 118171.4 | 3.9  | 7.5 | 0.6 | 7.4  | 1.3 | 0.4 | 1.2 | 0.88406 | 2216.4 | 22.1 | 2163.7 | 11.9 | 2114.1 | 10.9 | -4.8 |
| Spot 133 | 170 | 110141.6 | 2.0  | 5.4 | 0.5 | 12.7 | 1.2 | 0.5 | 1.1 | 0.89210 | 2635.4 | 23.1 | 2660.7 | 11.3 | 2680.0 | 8.9  | 1.7  |
| Spot 134 | 82  | 166371.9 | 6.7  | 7.6 | 0.6 | 6.8  | 1.1 | 0.4 | 0.9 | 0.84267 | 2061.8 | 16.7 | 2086.3 | 10.0 | 2110.5 | 10.6 | 2.3  |
| Spot 135 | 40  | 352225.6 | 1.8  | 7.2 | 0.6 | 7.8  | 1.1 | 0.4 | 0.9 | 0.82648 | 2209.9 | 16.6 | 2204.5 | 9.6  | 2199.4 | 10.5 | -0.5 |
| Spot 136 | 83  | 384847.4 | 2.1  | 5.4 | 0.5 | 13.1 | 0.9 | 0.5 | 0.7 | 0.77950 | 2709.4 | 14.9 | 2689.0 | 8.1  | 2673.7 | 8.9  | -1.3 |
| Spot 137 | 106 | 93419.8  | 2.5  | 5.4 | 0.6 | 13.0 | 1.1 | 0.5 | 0.9 | 0.83825 | 2665.7 | 20.5 | 2677.5 | 10.6 | 2686.4 | 10.1 | 0.8  |
| Spot 138 | 95  | 120418.3 | 2.6  | 5.4 | 0.6 | 13.0 | 1.1 | 0.5 | 0.9 | 0.84959 | 2679.4 | 19.6 | 2678.6 | 9.9  | 2678.0 | 9.2  | -0.1 |
| Spot 139 | 71  | 205691.8 | 0.9  | 7.7 | 0.6 | 6.9  | 1.2 | 0.4 | 1.0 | 0.86659 | 2138.7 | 18.7 | 2103.6 | 10.5 | 2069.5 | 10.4 | -3.3 |
| Spot 140 | 83  | 59948.6  | 2.0  | 7.2 | 0.5 | 7.3  | 0.8 | 0.4 | 0.7 | 0.79763 | 2103.0 | 12.1 | 2150.2 | 7.6  | 2195.6 | 8.9  | 4.2  |
| Spot 141 | 66  | 89803.1  | 2.4  | 7.2 | 0.7 | 7.6  | 1.2 | 0.4 | 0.9 | 0.80438 | 2155.7 | 17.4 | 2182.0 | 10.6 | 2206.8 | 12.1 | 2.3  |
| Spot 142 | 173 | 105904.2 | 2.2  | 6.5 | 0.5 | 9.2  | 1.1 | 0.4 | 1.0 | 0.90114 | 2339.8 | 18.9 | 2355.5 | 9.8  | 2369.2 | 7.9  | 1.2  |
| Spot 143 | 84  | 199673.6 | 2.1  | 6.9 | 0.5 | 8.6  | 0.9 | 0.4 | 0.8 | 0.86187 | 2314.2 | 15.9 | 2292.3 | 8.6  | 2272.7 | 8.3  | -1.8 |
| Spot 144 | 96  | #####    | 2.1  | 7.6 | 0.5 | 7.0  | 1.0 | 0.4 | 0.8 | 0.82857 | 2117.0 | 14.3 | 2112.2 | 8.5  | 2107.5 | 9.4  | -0.5 |
| Spot 145 | 122 | 184982.7 | 4.0  | 7.6 | 0.6 | 7.0  | 1.3 | 0.4 | 1.1 | 0.88992 | 2099.1 | 20.3 | 2106.4 | 11.3 | 2113.6 | 10.2 | 0.7  |
| Spot 146 | 126 | 24160.4  | 2.2  | 8.1 | 0.7 | 5.6  | 1.1 | 0.3 | 0.8 | 0.75567 | 1866.0 | 13.3 | 1921.6 | 9.4  | 1982.1 | 12.7 | 5.9  |
| Spot 147 | 201 | 38500.7  | 7.6  | 7.4 | 0.6 | 6.9  | 1.1 | 0.4 | 0.9 | 0.81031 | 2057.4 | 15.0 | 2103.6 | 9.3  | 2149.1 | 10.8 | 4.3  |
| Spot 148 | 10  | 101068.3 | 11.0 | 5.8 | 0.9 | 12.1 | 1.6 | 0.5 | 1.3 | 0.83053 | 2661.9 | 28.2 | 2611.8 | 14.6 | 2573.2 | 14.5 | -3.4 |
| Spot 149 | 54  | 106646.9 | 2.0  | 7.4 | 0.6 | 7.6  | 1.2 | 0.4 | 1.0 | 0.86446 | 2215.7 | 19.3 | 2183.8 | 10.7 | 2154.0 | 10.5 | -2.9 |
| Spot 150 | 92  | 283490.6 | 16.4 | 7.5 | 0.7 | 7.0  | 1.0 | 0.4 | 0.8 | 0.76118 | 2106.9 | 14.2 | 2115.4 | 9.2  | 2123.7 | 11.8 | 0.8  |
| Spot 151 | 87  | 99035.7  | 1.2  | 7.2 | 0.7 | 7.8  | 1.1 | 0.4 | 0.9 | 0.81216 | 2212.7 | 17.2 | 2203.9 | 10.1 | 2195.7 | 11.4 | -0.8 |
| Spot 152 | 118 | 27510.5  | 1.8  | 8.2 | 0.9 | 5.5  | 1.4 | 0.3 | 1.1 | 0.78046 | 1828.9 | 17.7 | 1895.9 | 12.2 | 1970.0 | 15.8 | 7.2  |
| Spot 153 | 231 | 392067.2 | 2.7  | 7.6 | 0.5 | 6.8  | 1.4 | 0.4 | 1.3 | 0.93224 | 2050.7 | 22.3 | 2079.4 | 12.0 | 2107.9 | 8.6  | 2.7  |
| Spot 154 | 100 | 367503.8 | 2.5  | 7.8 | 0.6 | 6.5  | 1.0 | 0.4 | 0.8 | 0.81026 | 2038.8 | 13.5 | 2044.7 | 8.4  | 2050.6 | 9.8  | 0.6  |
| Spot 155 | 85  | 104628.9 | 1.7  | 7.6 | 0.6 | 7.0  | 1.2 | 0.4 | 1.1 | 0.87177 | 2120.3 | 19.6 | 2109.7 | 11.1 | 2099.3 | 10.7 | -1.0 |
| Spot 156 | 140 | 37482.5  | 1.3  | 7.4 | 0.7 | 6.7  | 1.4 | 0.4 | 1.2 | 0.84429 | 2009.4 | 20.4 | 2072.6 | 12.4 | 2136.1 | 13.1 | 5.9  |
| Spot 157 | 75  | 119295.8 | 1.6  | 7.6 | 0.6 | 6.9  | 1.1 | 0.4 | 1.0 | 0.84888 | 2091.2 | 17.2 | 2096.7 | 10.0 | 2102.0 | 10.5 | 0.5  |
| Spot 158 | 85  | 291714.1 | 5.5  | 7.5 | 0.7 | 7.1  | 1.1 | 0.4 | 0.9 | 0.78619 | 2130.1 | 16.2 | 2128.8 | 10.1 | 2127.5 | 12.3 | -0.1 |
| Spot 159 | 60  | 89617.9  | 0.9  | 5.4 | 0.5 | 12.9 | 1.0 | 0.5 | 0.8 | 0.84394 | 2645.5 | 17.8 | 2670.4 | 9.1  | 2689.3 | 8.6  | 1.6  |
| Spot 160 | 63  | 226913.9 | 3.4  | 6.0 | 0.6 | 10.7 | 1.2 | 0.5 | 1.0 | 0.87487 | 2501.0 | 21.3 | 2496.9 | 10.9 | 2493.6 | 9.6  | -0.3 |
| Spot 161 | 132 | 405773.7 | 2.4  | 5.4 | 0.6 | 12.8 | 1.3 | 0.5 | 1.2 | 0.88736 | 2650.2 | 25.5 | 2662.8 | 12.5 | 2672.3 | 10.1 | 0.8  |
| Spot 162 | 55  | 16659.9  | 3.3  | 7.9 | 1.6 | 6.6  | 2.1 | 0.4 | 1.2 | 0.59817 | 2094.2 | 22.2 | 2055.4 | 18.3 | 2016.7 | 29.5 | -3.8 |
| Spot 163 | 83  | 41372.1  | 1.5  | 8.4 | 0.6 | 5.4  | 1.2 | 0.3 | 1.1 | 0.85972 | 1854.4 | 17.3 | 1884.5 | 10.7 | 1917.8 | 11.4 | 3.3  |
| Spot 164 | 123 | 97376.0  | 1.6  | 8.5 | 0.7 | 5.5  | 1.2 | 0.3 | 0.9 | 0.79284 | 1898.9 | 15.3 | 1900.5 | 10.1 | 1902.2 | 12.8 | 0.2  |
| Spot 165 | 75  | 547103.2 | 1.5  | 7.9 | 0.6 | 6.2  | 1.0 | 0.4 | 0.8 | 0.80297 | 1963.1 | 13.4 | 1998.2 | 8.6  | 2034.7 | 10.4 | 3.5  |
| Spot 166 | 59  | 290456.3 | 2.0  | 7.5 | 0.7 | 7.2  | 1.2 | 0.4 | 1.0 | 0.82048 | 2138.4 | 17.6 | 2135.3 | 10.5 | 2132.3 | 11.8 | -0.3 |
| Spot 167 | 37  | 42269.9  | 3.1  | 7.5 | 0.7 | 7.1  | 1.2 | 0.4 | 0.9 | 0.77881 | 2126.8 | 16.5 | 2123.5 | 10.4 | 2120.3 | 12.9 | -0.3 |
| Spot 168 | 35  | 238921.7 | 2.3  | 4.6 | 0.7 | 17.5 | 1.2 | 0.6 | 1.0 | 0.82883 | 2984.2 | 24.4 | 2961.1 | 11.8 | 2945.5 | 11.1 | -1.3 |
| Spot 169 | 27  | 48708.0  | 1.6  | 8.2 | 0.7 | 6.2  | 1.3 | 0.4 | 1.1 | 0.82370 | 2037.7 | 18.9 | 1997.8 | 11.5 | 1956.8 | 13.3 | -4.1 |
| Spot 170 | 81  | 159385.4 | 11.2 | 5.8 | 0.6 | 11.5 | 1.2 | 0.5 | 1.0 | 0.85689 | 2558.3 | 21.1 | 2567.0 | 10.9 | 2573.8 | 10.0 | 0.6  |

|          |     |           |     |     |     |      |     |     |     |         |        |      |        |      |        |      |      |
|----------|-----|-----------|-----|-----|-----|------|-----|-----|-----|---------|--------|------|--------|------|--------|------|------|
| Spot 171 | 98  | 18306.3   | 1.9 | 8.0 | 0.9 | 5.6  | 1.5 | 0.3 | 1.2 | 0.78713 | 1836.3 | 18.4 | 1918.0 | 12.6 | 2007.3 | 16.0 | 8.5  |
| Spot 172 | 50  | 1366660.2 | 1.8 | 5.5 | 0.6 | 12.8 | 1.2 | 0.5 | 1.0 | 0.83264 | 2689.6 | 21.1 | 2667.7 | 10.9 | 2651.1 | 10.6 | -1.5 |
| Spot 173 | 189 | 299452.1  | 1.8 | 8.5 | 0.6 | 5.4  | 0.9 | 0.3 | 0.8 | 0.79908 | 1862.9 | 12.3 | 1880.4 | 8.1  | 1899.6 | 10.2 | 1.9  |
| Spot 174 | 96  | 97042.3   | 1.9 | 5.4 | 0.5 | 13.1 | 1.0 | 0.5 | 0.9 | 0.83990 | 2692.4 | 18.7 | 2690.4 | 9.6  | 2688.9 | 9.1  | -0.1 |
| Spot 175 | 87  | 357285.3  | 1.3 | 3.8 | 0.6 | 23.5 | 1.1 | 0.7 | 0.9 | 0.85549 | 3252.4 | 23.5 | 3249.9 | 10.5 | 3248.3 | 8.8  | -0.1 |
| Spot 176 | 87  | 1736361.9 | 1.8 | 5.5 | 0.5 | 12.9 | 1.2 | 0.5 | 1.1 | 0.89604 | 2689.2 | 23.8 | 2673.6 | 11.4 | 2661.8 | 8.9  | -1.0 |
| Spot 177 | 100 | 799695.6  | 1.7 | 4.6 | 0.7 | 16.7 | 1.1 | 0.6 | 0.9 | 0.77354 | 2874.8 | 20.3 | 2919.0 | 10.8 | 2949.7 | 11.6 | 2.5  |
| Spot 178 | 95  | 10928.0   | 2.9 | 6.9 | 1.1 | 7.8  | 1.7 | 0.4 | 1.2 | 0.74166 | 2146.6 | 22.6 | 2207.5 | 15.0 | 2264.5 | 19.3 | 5.2  |
| Spot 179 | 103 | 154464.1  | 2.1 | 5.4 | 0.5 | 12.8 | 0.9 | 0.5 | 0.8 | 0.83434 | 2650.2 | 17.1 | 2662.6 | 8.9  | 2672.0 | 8.6  | 0.8  |
| Spot 180 | 89  | 92018.5   | 1.6 | 7.5 | 0.5 | 7.0  | 0.9 | 0.4 | 0.7 | 0.81509 | 2115.4 | 13.4 | 2114.8 | 8.1  | 2114.2 | 9.2  | -0.1 |
| Spot 181 | 85  | 1071001.0 | 2.5 | 5.4 | 0.8 | 13.1 | 1.1 | 0.5 | 0.8 | 0.70509 | 2695.3 | 16.8 | 2687.0 | 10.2 | 2680.7 | 12.7 | -0.5 |
| Spot 182 | 75  | 116985.2  | 2.1 | 8.5 | 0.6 | 5.3  | 1.0 | 0.3 | 0.8 | 0.78937 | 1840.8 | 12.5 | 1869.2 | 8.5  | 1901.0 | 10.9 | 3.2  |
| Spot 183 | 35  | 90928.5   | 3.2 | 8.6 | 0.7 | 5.6  | 1.2 | 0.4 | 1.0 | 0.81657 | 1953.4 | 16.3 | 1914.6 | 10.2 | 1872.8 | 12.3 | -4.3 |
| Spot 184 | 106 | 113720.1  | 2.4 | 7.7 | 0.6 | 6.7  | 1.1 | 0.4 | 0.9 | 0.79758 | 2069.6 | 15.0 | 2068.6 | 9.4  | 2067.5 | 11.3 | -0.1 |
| Spot 185 | 17  | 458956.7  | 1.4 | 3.7 | 0.7 | 24.3 | 1.3 | 0.7 | 1.0 | 0.82772 | 3272.4 | 26.6 | 3279.7 | 12.2 | 3284.2 | 11.1 | 0.4  |
| Spot 186 | 112 | 97327.1   | 2.5 | 7.2 | 0.7 | 7.8  | 1.3 | 0.4 | 1.1 | 0.84921 | 2222.5 | 20.4 | 2206.3 | 11.5 | 2191.2 | 11.8 | -1.4 |
| Spot 187 | 194 | 245640.1  | 2.6 | 5.5 | 0.7 | 12.2 | 1.1 | 0.5 | 0.9 | 0.78882 | 2577.6 | 18.9 | 2621.8 | 10.6 | 2656.1 | 11.5 | 3.0  |
| Spot 188 | 77  | 36138.0   | 2.1 | 8.4 | 0.5 | 5.7  | 0.8 | 0.4 | 0.6 | 0.76879 | 1943.5 | 10.2 | 1930.3 | 6.8  | 1916.3 | 9.1  | -1.4 |
| Spot 189 | 104 | 133451.2  | 1.8 | 8.4 | 0.7 | 5.6  | 1.2 | 0.3 | 1.0 | 0.82599 | 1923.8 | 16.5 | 1917.8 | 10.3 | 1911.2 | 12.1 | -0.7 |
| Spot 190 | 51  | 10745.0   | 1.8 | 7.1 | 0.7 | 7.5  | 1.1 | 0.4 | 0.9 | 0.77608 | 2139.1 | 15.9 | 2178.9 | 10.1 | 2216.6 | 12.3 | 3.5  |
| Spot 191 | 116 | 209283.9  | 2.4 | 5.4 | 0.6 | 12.9 | 1.2 | 0.5 | 1.0 | 0.86216 | 2659.3 | 22.6 | 2670.7 | 11.3 | 2679.3 | 10.1 | 0.7  |
| Spot 192 | 125 | 227884.8  | 2.0 | 7.6 | 0.7 | 6.9  | 1.4 | 0.4 | 1.1 | 0.84976 | 2092.2 | 20.5 | 2094.7 | 12.0 | 2097.2 | 12.5 | 0.2  |
| Spot 193 | 29  | 36158.9   | 2.8 | 7.5 | 0.6 | 7.2  | 1.1 | 0.4 | 0.9 | 0.83296 | 2138.8 | 16.0 | 2130.3 | 9.4  | 2122.1 | 10.2 | -0.8 |
| Spot 194 | 135 | 107305.4  | 1.7 | 5.6 | 0.6 | 12.3 | 1.1 | 0.5 | 0.9 | 0.83167 | 2627.7 | 19.8 | 2630.9 | 10.3 | 2633.3 | 10.2 | 0.2  |
| Spot 195 | 86  | 74069.0   | 1.1 | 7.9 | 0.7 | 6.4  | 1.1 | 0.4 | 0.9 | 0.76634 | 2027.3 | 14.9 | 2031.4 | 9.8  | 2035.5 | 12.7 | 0.4  |
| Spot 196 | 115 | 163818.2  | 2.5 | 5.6 | 0.5 | 12.3 | 0.9 | 0.5 | 0.8 | 0.86612 | 2634.2 | 17.7 | 2631.1 | 8.9  | 2628.7 | 7.8  | -0.2 |
| Spot 197 | 73  | 41290.9   | 2.6 | 8.3 | 0.7 | 5.6  | 1.1 | 0.3 | 0.9 | 0.80773 | 1908.2 | 15.1 | 1918.4 | 9.8  | 1929.3 | 12.0 | 1.1  |
| Spot 198 | 34  | 560583.2  | 2.0 | 4.2 | 0.7 | 19.6 | 1.1 | 0.6 | 0.9 | 0.79879 | 3056.3 | 21.3 | 3070.4 | 10.6 | 3079.6 | 10.5 | 0.8  |
| Spot 199 | 112 | 200351.5  | 2.7 | 6.9 | 0.6 | 8.4  | 1.1 | 0.4 | 1.0 | 0.85045 | 2277.9 | 18.6 | 2271.9 | 10.4 | 2266.5 | 10.4 | -0.5 |
| Spot 200 | 52  | 184104.5  | 4.8 | 5.0 | 0.6 | 15.2 | 1.2 | 0.6 | 1.0 | 0.86896 | 2855.0 | 23.6 | 2829.7 | 11.2 | 2811.7 | 9.5  | -1.5 |
| Spot 201 | 104 | 159037.0  | 1.9 | 7.1 | 0.7 | 7.7  | 1.1 | 0.4 | 0.8 | 0.72629 | 2181.5 | 14.2 | 2199.9 | 9.5  | 2217.1 | 12.6 | 1.6  |
| Spot 202 | 28  | 75246.6   | 2.5 | 7.6 | 0.8 | 7.2  | 1.3 | 0.4 | 1.0 | 0.78250 | 2186.9 | 18.3 | 2138.1 | 11.2 | 2091.6 | 13.8 | -4.6 |
| Spot 203 | 126 | 27766.1   | 3.4 | 7.1 | 0.8 | 8.0  | 1.2 | 0.4 | 0.9 | 0.75112 | 2244.3 | 16.5 | 2232.5 | 10.5 | 2221.8 | 13.3 | -1.0 |
| Spot 204 | 31  | 356101.1  | 2.2 | 7.2 | 0.8 | 7.7  | 1.3 | 0.4 | 1.0 | 0.79332 | 2185.0 | 19.0 | 2194.0 | 11.6 | 2202.4 | 13.7 | 0.8  |
| Spot 205 | 91  | 12538.1   | 1.7 | 7.9 | 0.8 | 5.9  | 1.0 | 0.3 | 0.6 | 0.58208 | 1899.6 | 9.6  | 1956.0 | 8.7  | 2016.3 | 14.5 | 5.8  |
| Spot 206 | 85  | 95805.2   | 2.0 | 7.6 | 0.7 | 7.0  | 1.1 | 0.4 | 0.9 | 0.80429 | 2129.8 | 16.4 | 2108.3 | 10.0 | 2087.4 | 11.8 | -2.0 |
| Spot 207 | 70  | 253624.5  | 1.5 | 7.5 | 0.6 | 7.5  | 1.1 | 0.4 | 0.9 | 0.83002 | 2219.0 | 17.2 | 2167.4 | 9.9  | 2119.0 | 10.8 | -4.7 |
| Spot 208 | 57  | 195656.2  | 1.6 | 5.5 | 0.6 | 12.7 | 1.1 | 0.5 | 1.0 | 0.84798 | 2646.0 | 20.9 | 2654.3 | 10.7 | 2660.7 | 10.0 | 0.6  |
| Spot 209 | 140 | 45688.4   | 1.5 | 8.3 | 0.4 | 5.2  | 0.8 | 0.3 | 0.7 | 0.85380 | 1788.2 | 11.3 | 1857.2 | 7.2  | 1935.3 | 7.9  | 7.6  |
| Spot 210 | 31  | 114295.8  | 2.3 | 7.4 | 0.7 | 7.3  | 1.4 | 0.4 | 1.2 | 0.86998 | 2164.6 | 22.1 | 2154.1 | 12.3 | 2144.1 | 11.9 | -1.0 |
| Spot 211 | 19  | 97810.7   | 0.7 | 7.5 | 0.7 | 6.9  | 1.6 | 0.4 | 1.4 | 0.89738 | 2085.2 | 25.0 | 2104.6 | 13.9 | 2123.7 | 12.1 | 1.8  |
| Spot 212 | 76  | 96126.5   | 3.5 | 7.1 | 0.7 | 8.0  | 1.2 | 0.4 | 0.9 | 0.77727 | 2229.0 | 16.9 | 2228.0 | 10.4 | 2227.1 | 12.5 | -0.1 |
| Spot 213 | 93  | 168608.5  | 3.1 | 7.8 | 0.5 | 6.7  | 0.9 | 0.4 | 0.7 | 0.83082 | 2086.2 | 13.1 | 2073.9 | 7.8  | 2061.7 | 8.7  | -1.2 |

|          |     |           |     |     |     |      |     |     |     |         |        |      |        |      |        |      |      |
|----------|-----|-----------|-----|-----|-----|------|-----|-----|-----|---------|--------|------|--------|------|--------|------|------|
| Spot 214 | 132 | 1056965.1 | 3.2 | 7.6 | 0.6 | 6.9  | 1.2 | 0.4 | 1.1 | 0.87184 | 2100.4 | 19.0 | 2102.9 | 10.8 | 2105.3 | 10.5 | 0.2  |
| Spot 215 | 84  | 143722.4  | 2.3 | 8.5 | 0.7 | 5.6  | 1.1 | 0.3 | 0.9 | 0.76738 | 1921.9 | 14.4 | 1910.5 | 9.7  | 1898.1 | 13.0 | -1.3 |
| Spot 216 | 146 | 89146.6   | 3.1 | 7.4 | 0.5 | 7.1  | 1.0 | 0.4 | 0.9 | 0.84798 | 2121.6 | 15.8 | 2128.8 | 9.2  | 2135.8 | 9.6  | 0.7  |
| Spot 217 | 66  | 75828.2   | 3.3 | 5.4 | 0.6 | 13.5 | 1.1 | 0.5 | 0.9 | 0.85699 | 2740.5 | 20.8 | 2715.4 | 10.3 | 2696.7 | 9.3  | -1.6 |
| Spot 218 | 33  | 3539.7    | 1.4 | 4.7 | 1.2 | 15.2 | 1.6 | 0.5 | 1.0 | 0.63744 | 2749.5 | 22.9 | 2828.7 | 15.3 | 2885.5 | 20.1 | 4.7  |
| Spot 219 | 85  | 274380.4  | 2.9 | 5.4 | 0.5 | 13.2 | 1.0 | 0.5 | 0.9 | 0.86241 | 2711.7 | 20.0 | 2695.9 | 9.9  | 2684.0 | 8.8  | -1.0 |
| Spot 220 | 156 | 579608.4  | 1.9 | 7.7 | 0.7 | 6.7  | 1.1 | 0.4 | 0.8 | 0.77780 | 2062.5 | 14.8 | 2066.5 | 9.5  | 2070.5 | 11.9 | 0.4  |
| Spot 221 | 32  | 30785.8   | 3.9 | 7.6 | 0.7 | 7.1  | 1.2 | 0.4 | 1.0 | 0.79995 | 2173.0 | 18.2 | 2129.8 | 11.0 | 2088.3 | 13.0 | -4.1 |
| Spot 222 | 68  | 155916.4  | 2.7 | 7.6 | 0.6 | 7.0  | 1.1 | 0.4 | 1.0 | 0.83649 | 2130.6 | 17.4 | 2113.6 | 10.2 | 2097.0 | 11.1 | -1.6 |
| Spot 223 | 55  | 60480.0   | 1.1 | 7.4 | 0.8 | 7.5  | 1.3 | 0.4 | 1.0 | 0.79831 | 2179.6 | 19.3 | 2168.9 | 11.7 | 2158.7 | 13.8 | -1.0 |
| Spot 224 | 56  | 159720.2  | 1.5 | 7.5 | 0.6 | 7.1  | 1.3 | 0.4 | 1.2 | 0.90263 | 2118.6 | 21.8 | 2125.5 | 11.9 | 2132.2 | 10.1 | 0.6  |
| Spot 225 | 101 | 108286.5  | 3.7 | 7.5 | 0.6 | 7.4  | 1.2 | 0.4 | 1.0 | 0.87385 | 2201.9 | 19.1 | 2166.0 | 10.5 | 2132.1 | 10.0 | -3.3 |
| Spot 226 | 137 | 9252.5    | 2.6 | 5.1 | 0.8 | 12.4 | 1.5 | 0.5 | 1.3 | 0.86686 | 2470.6 | 26.8 | 2638.4 | 14.2 | 2769.8 | 12.3 | 10.8 |
| Spot 227 | 76  | 73783.2   | 1.9 | 8.5 | 0.7 | 5.5  | 1.2 | 0.3 | 1.0 | 0.83005 | 1878.4 | 16.1 | 1893.4 | 10.2 | 1909.7 | 11.9 | 1.6  |
| Spot 228 | 76  | 45933.3   | 1.4 | 8.4 | 0.6 | 5.6  | 0.9 | 0.3 | 0.7 | 0.78765 | 1905.7 | 11.7 | 1911.8 | 7.7  | 1918.3 | 9.9  | 0.7  |
| Spot 229 | 95  | 105842.4  | 3.4 | 7.8 | 0.6 | 6.8  | 1.1 | 0.4 | 0.9 | 0.82712 | 2118.9 | 15.7 | 2082.0 | 9.3  | 2045.7 | 10.5 | -3.6 |
| Spot 230 | 168 | 10229.2   | 8.0 | 6.6 | 1.1 | 8.0  | 1.5 | 0.4 | 0.9 | 0.64320 | 2129.5 | 17.1 | 2231.0 | 13.3 | 2325.5 | 19.3 | 8.4  |
| Spot 231 | 129 | 118675.7  | 2.8 | 5.4 | 0.6 | 13.3 | 1.1 | 0.5 | 1.0 | 0.85127 | 2729.3 | 21.7 | 2699.8 | 10.8 | 2677.7 | 9.9  | -1.9 |
| Spot 232 | 41  | 75338.8   | 1.7 | 8.4 | 0.6 | 5.7  | 1.2 | 0.4 | 1.1 | 0.86039 | 1934.9 | 18.0 | 1925.6 | 10.8 | 1915.7 | 11.4 | -1.0 |
| Spot 233 | 127 | 108399.3  | 2.3 | 5.4 | 0.6 | 12.8 | 1.0 | 0.5 | 0.8 | 0.79444 | 2640.9 | 17.9 | 2668.4 | 9.8  | 2689.3 | 10.4 | 1.8  |
| Spot 234 | 148 | 140635.3  | 2.1 | 8.5 | 0.6 | 5.6  | 1.0 | 0.3 | 0.8 | 0.80687 | 1908.3 | 13.3 | 1909.7 | 8.6  | 1911.1 | 10.6 | 0.1  |
| Spot 235 | 45  | 28714.0   | 0.8 | 5.4 | 0.6 | 12.9 | 1.1 | 0.5 | 1.0 | 0.87102 | 2660.5 | 21.4 | 2670.8 | 10.6 | 2678.5 | 9.2  | 0.7  |
| Spot 236 | 85  | 595303.8  | 1.9 | 8.6 | 0.7 | 5.5  | 1.0 | 0.3 | 0.8 | 0.76038 | 1913.6 | 12.9 | 1901.0 | 8.8  | 1887.3 | 12.0 | -1.4 |
| Spot 237 | 74  | 81300.6   | 2.8 | 5.4 | 0.5 | 13.1 | 0.9 | 0.5 | 0.8 | 0.81339 | 2675.8 | 16.6 | 2683.8 | 8.8  | 2689.9 | 8.9  | 0.5  |
| Spot 238 | 32  | 1489373.4 | 1.8 | 5.6 | 0.7 | 12.4 | 1.2 | 0.5 | 1.0 | 0.83436 | 2634.2 | 22.1 | 2634.2 | 11.5 | 2634.2 | 11.2 | 0.0  |
| Spot 239 | 49  | 119974.1  | 3.9 | 7.7 | 0.6 | 7.0  | 1.1 | 0.4 | 0.9 | 0.82422 | 2134.8 | 16.9 | 2107.0 | 10.0 | 2079.9 | 11.2 | -2.6 |
| Spot 240 | 107 | 89384.5   | 2.4 | 8.6 | 0.6 | 5.4  | 1.0 | 0.3 | 0.8 | 0.76512 | 1894.3 | 12.5 | 1892.7 | 8.5  | 1890.9 | 11.5 | -0.2 |
| Spot 241 | 106 | 13531.8   | 2.2 | 7.5 | 0.8 | 6.7  | 1.0 | 0.4 | 0.7 | 0.66695 | 2021.1 | 11.7 | 2072.4 | 8.9  | 2123.8 | 13.2 | 4.8  |
| Spot 242 | 122 | 123093.6  | 1.5 | 7.6 | 0.7 | 7.0  | 1.3 | 0.4 | 1.1 | 0.85259 | 2110.2 | 20.6 | 2109.3 | 12.0 | 2108.4 | 12.3 | -0.1 |
| Spot 243 | 186 | 27444.5   | 2.3 | 7.3 | 0.8 | 7.0  | 1.5 | 0.4 | 1.3 | 0.85708 | 2050.0 | 22.6 | 2113.9 | 13.3 | 2176.7 | 13.4 | 5.8  |
| Spot 244 | 97  | 209316.6  | 4.3 | 4.9 | 0.6 | 15.6 | 1.2 | 0.6 | 1.1 | 0.87890 | 2857.5 | 24.7 | 2854.9 | 11.6 | 2853.1 | 9.5  | -0.2 |
| Spot 245 | 44  | 107278.3  | 1.4 | 7.8 | 0.7 | 6.8  | 1.2 | 0.4 | 1.0 | 0.80621 | 2112.2 | 17.5 | 2080.5 | 10.7 | 2049.2 | 12.6 | -3.1 |
| Spot 246 | 34  | 136101.1  | 1.2 | 5.4 | 0.6 | 13.0 | 1.3 | 0.5 | 1.1 | 0.87635 | 2680.6 | 24.1 | 2679.3 | 11.8 | 2678.3 | 10.0 | -0.1 |
| Spot 247 | 82  | 141810.7  | 2.1 | 8.2 | 0.7 | 6.0  | 1.1 | 0.4 | 0.8 | 0.78094 | 1984.7 | 14.5 | 1979.1 | 9.5  | 1973.2 | 12.1 | -0.6 |
| Spot 248 | 63  | 59583.6   | 2.4 | 8.4 | 0.6 | 5.8  | 1.1 | 0.4 | 0.9 | 0.85351 | 1968.4 | 15.6 | 1941.2 | 9.3  | 1912.3 | 10.1 | -2.9 |
| Spot 249 | 151 | 159552.5  | 2.2 | 8.5 | 0.4 | 5.5  | 1.0 | 0.3 | 0.9 | 0.91339 | 1882.3 | 15.2 | 1895.6 | 8.8  | 1910.1 | 7.5  | 1.5  |
| Spot 250 | 97  | 415629.8  | 2.8 | 5.5 | 0.5 | 13.2 | 1.0 | 0.5 | 0.9 | 0.84568 | 2736.7 | 19.3 | 2697.4 | 9.7  | 2668.0 | 9.1  | -2.6 |
| Spot 251 | 71  | 21650.3   | 1.7 | 7.4 | 0.6 | 7.0  | 1.1 | 0.4 | 0.9 | 0.79733 | 2083.5 | 15.3 | 2113.5 | 9.6  | 2142.8 | 11.3 | 2.8  |
| Spot 252 | 94  | 548218.9  | 0.8 | 8.6 | 0.6 | 5.4  | 1.1 | 0.3 | 0.8 | 0.79343 | 1891.5 | 13.9 | 1885.1 | 9.1  | 1878.0 | 11.7 | -0.7 |
| Spot 253 | 165 | 248114.3  | 2.5 | 7.6 | 0.6 | 6.8  | 1.1 | 0.4 | 0.9 | 0.81514 | 2079.0 | 15.6 | 2090.8 | 9.5  | 2102.4 | 10.9 | 1.1  |
| Spot 254 | 16  | 166666.8  | 1.6 | 7.3 | 0.7 | 7.7  | 1.4 | 0.4 | 1.2 | 0.85690 | 2210.9 | 22.0 | 2191.7 | 12.3 | 2173.7 | 12.3 | -1.7 |
| Spot 255 | 85  | 210964.2  | 2.6 | 5.4 | 0.7 | 13.0 | 1.2 | 0.5 | 1.0 | 0.83191 | 2683.8 | 22.4 | 2677.4 | 11.6 | 2672.6 | 11.3 | -0.4 |
| Spot 256 | 67  | 119632.9  | 1.9 | 7.7 | 0.7 | 6.8  | 1.2 | 0.4 | 0.9 | 0.78521 | 2101.1 | 16.9 | 2087.9 | 10.6 | 2074.9 | 13.1 | -1.3 |

|          |     |           |     |     |     |      |     |     |     |         |        |      |        |      |        |      |      |
|----------|-----|-----------|-----|-----|-----|------|-----|-----|-----|---------|--------|------|--------|------|--------|------|------|
| Spot 257 | 85  | 398883.2  | 1.3 | 3.9 | 0.6 | 23.2 | 1.0 | 0.7 | 0.8 | 0.79668 | 3247.5 | 20.6 | 3233.7 | 9.9  | 3225.1 | 9.7  | -0.7 |
| Spot 258 | 38  | 45444.9   | 1.2 | 8.1 | 0.6 | 6.0  | 0.9 | 0.4 | 0.7 | 0.75680 | 1976.7 | 11.8 | 1981.2 | 8.0  | 1985.9 | 10.7 | 0.5  |
| Spot 259 | 102 | 645584.4  | 2.3 | 5.4 | 0.5 | 13.1 | 1.1 | 0.5 | 1.0 | 0.89249 | 2709.0 | 21.8 | 2689.1 | 10.4 | 2674.1 | 8.2  | -1.3 |
| Spot 260 | 81  | 1633833.2 | 2.4 | 5.6 | 0.7 | 12.6 | 1.1 | 0.5 | 0.8 | 0.78638 | 2702.8 | 18.7 | 2653.7 | 10.1 | 2616.5 | 11.1 | -3.3 |
| Spot 261 | 101 | 285633.7  | 2.3 | 7.5 | 0.7 | 7.2  | 1.2 | 0.4 | 1.0 | 0.84077 | 2150.0 | 18.7 | 2130.8 | 10.8 | 2112.4 | 11.5 | -1.8 |
| Spot 262 | 115 | 330629.6  | 2.1 | 5.4 | 0.7 | 13.0 | 1.4 | 0.5 | 1.3 | 0.88337 | 2680.6 | 28.0 | 2679.8 | 13.6 | 2679.2 | 11.2 | -0.1 |
| Spot 263 | 47  | 20128.1   | 1.1 | 6.9 | 2.3 | 7.6  | 2.4 | 0.4 | 0.7 | 0.27884 | 2093.7 | 11.9 | 2183.0 | 21.4 | 2268.0 | 39.4 | 7.7  |
| Spot 264 | 87  | 116424.9  | 2.1 | 7.6 | 0.6 | 7.0  | 1.1 | 0.4 | 1.0 | 0.85650 | 2109.5 | 17.4 | 2107.7 | 10.0 | 2106.0 | 10.2 | -0.2 |
| Spot 265 | 103 | 224002.9  | 1.7 | 5.3 | 0.6 | 13.5 | 1.1 | 0.5 | 0.9 | 0.83731 | 2731.2 | 19.8 | 2713.1 | 10.0 | 2699.6 | 9.6  | -1.2 |
| Spot 266 | 147 | 634340.6  | 3.0 | 7.6 | 0.6 | 6.8  | 1.1 | 0.4 | 0.9 | 0.83734 | 2068.0 | 15.7 | 2080.3 | 9.4  | 2092.6 | 10.2 | 1.2  |
| Spot 267 | 71  | 119735.2  | 2.5 | 5.4 | 0.6 | 13.2 | 1.1 | 0.5 | 1.0 | 0.86354 | 2710.2 | 21.5 | 2693.5 | 10.6 | 2680.9 | 9.4  | -1.1 |
| Spot 268 | 68  | 102456.7  | 2.3 | 5.4 | 0.4 | 13.4 | 0.9 | 0.5 | 0.8 | 0.87097 | 2745.5 | 17.0 | 2705.8 | 8.2  | 2676.3 | 7.1  | -2.6 |
| Spot 269 | 98  | 86313.9   | 1.6 | 7.1 | 0.6 | 7.7  | 1.0 | 0.4 | 0.8 | 0.82360 | 2172.9 | 15.6 | 2191.8 | 9.2  | 2209.5 | 10.1 | 1.7  |
| Spot 270 | 109 | 150568.0  | 2.1 | 8.6 | 0.5 | 5.5  | 1.1 | 0.3 | 1.0 | 0.90469 | 1924.5 | 16.8 | 1903.8 | 9.6  | 1881.3 | 8.6  | -2.3 |
| Spot 271 | 38  | 20135.8   | 2.5 | 8.1 | 1.0 | 6.1  | 1.5 | 0.4 | 1.2 | 0.76077 | 1987.4 | 19.7 | 1988.2 | 13.2 | 1989.0 | 17.5 | 0.1  |
| Spot 272 | 37  | 57811.8   | 2.9 | 7.7 | 0.6 | 7.1  | 1.2 | 0.4 | 1.0 | 0.85079 | 2160.5 | 18.4 | 2120.6 | 10.5 | 2082.1 | 10.9 | -3.8 |
| Spot 273 | 65  | 171000.5  | 1.2 | 8.0 | 0.8 | 6.2  | 1.1 | 0.4 | 0.7 | 0.67050 | 2016.0 | 12.6 | 2008.0 | 9.5  | 1999.8 | 14.4 | -0.8 |
| Spot 274 | 128 | 248359.6  | 5.4 | 7.4 | 0.5 | 7.3  | 0.9 | 0.4 | 0.8 | 0.84027 | 2164.1 | 14.4 | 2150.0 | 8.3  | 2136.6 | 8.8  | -1.3 |
| Spot 275 | 66  | 211012.4  | 2.8 | 7.6 | 0.6 | 7.0  | 1.1 | 0.4 | 0.9 | 0.82542 | 2119.5 | 15.8 | 2107.1 | 9.4  | 2095.1 | 10.5 | -1.2 |
| Spot 276 | 46  | 5479.2    | 0.8 | 6.8 | 1.0 | 6.9  | 1.3 | 0.4 | 0.8 | 0.61045 | 1947.9 | 13.3 | 2103.1 | 11.5 | 2258.6 | 17.7 | 13.8 |
| Spot 277 | 51  | 54840.9   | 2.1 | 7.2 | 1.0 | 7.9  | 1.4 | 0.4 | 1.0 | 0.73220 | 2247.4 | 19.6 | 2221.3 | 12.7 | 2197.3 | 16.7 | -2.3 |
| Spot 278 | 47  | 92384.0   | 2.4 | 7.2 | 0.6 | 8.1  | 1.2 | 0.4 | 1.1 | 0.86273 | 2291.7 | 20.6 | 2242.0 | 11.2 | 2196.9 | 10.9 | -4.3 |
| Spot 279 | 52  | 1215876.4 | 2.3 | 7.6 | 0.5 | 7.0  | 1.1 | 0.4 | 0.9 | 0.86683 | 2126.3 | 16.9 | 2111.0 | 9.6  | 2096.1 | 9.4  | -1.4 |
| Spot 280 | 44  | 71681.6   | 2.3 | 7.6 | 0.7 | 7.0  | 1.2 | 0.4 | 1.0 | 0.83155 | 2107.0 | 18.2 | 2107.4 | 10.8 | 2107.7 | 11.9 | 0.0  |
| Spot 281 | 37  | 104447.9  | 2.6 | 7.2 | 0.8 | 7.5  | 1.2 | 0.4 | 0.9 | 0.77975 | 2145.2 | 17.0 | 2173.1 | 10.7 | 2199.6 | 13.0 | 2.5  |
| Spot 282 | 80  | 93348.3   | 1.7 | 8.5 | 0.5 | 5.5  | 1.0 | 0.3 | 0.8 | 0.85625 | 1903.1 | 13.4 | 1902.9 | 8.2  | 1902.6 | 8.8  | 0.0  |
| Spot 283 | 98  | 387402.8  | 2.5 | 5.5 | 0.6 | 12.8 | 1.0 | 0.5 | 0.8 | 0.83746 | 2670.5 | 18.5 | 2667.9 | 9.5  | 2665.9 | 9.1  | -0.2 |
| Spot 284 | 145 | 445836.5  | 2.6 | 7.8 | 0.6 | 6.8  | 1.1 | 0.4 | 0.9 | 0.83607 | 2117.1 | 16.1 | 2090.0 | 9.5  | 2063.4 | 10.3 | -2.6 |
| Spot 285 | 78  | 745362.6  | 2.3 | 4.1 | 0.5 | 21.3 | 1.0 | 0.6 | 0.8 | 0.84041 | 3165.0 | 20.5 | 3150.1 | 9.5  | 3140.7 | 8.4  | -0.8 |
| Spot 286 | 78  | 126895.5  | 2.0 | 8.6 | 0.6 | 5.5  | 1.2 | 0.3 | 1.0 | 0.85649 | 1906.8 | 16.4 | 1894.2 | 9.9  | 1880.3 | 10.8 | -1.4 |
| Spot 287 | 93  | 427648.3  | 1.9 | 4.1 | 0.3 | 21.6 | 0.9 | 0.7 | 0.8 | 0.91896 | 3232.2 | 19.9 | 3164.9 | 8.3  | 3122.4 | 5.3  | -3.5 |
| Spot 288 | 113 | 123783.9  | 2.6 | 8.5 | 0.6 | 5.5  | 1.0 | 0.3 | 0.8 | 0.79297 | 1897.5 | 13.6 | 1896.8 | 9.0  | 1896.0 | 11.5 | -0.1 |
| Spot 289 | 75  | 51736.3   | 1.7 | 8.3 | 0.6 | 5.5  | 1.3 | 0.3 | 1.1 | 0.85853 | 1875.0 | 17.6 | 1905.8 | 10.8 | 1939.5 | 11.5 | 3.3  |
| Spot 290 | 48  | 282348.0  | 1.7 | 8.5 | 0.8 | 5.7  | 1.2 | 0.4 | 1.0 | 0.78440 | 1941.1 | 16.2 | 1923.9 | 10.6 | 1905.4 | 13.7 | -1.9 |
| Spot 291 | 83  | 93190.3   | 2.6 | 5.4 | 0.6 | 13.0 | 1.3 | 0.5 | 1.1 | 0.88128 | 2676.3 | 24.2 | 2681.7 | 11.8 | 2685.7 | 9.8  | 0.4  |
| Spot 292 | 79  | 623967.3  | 3.1 | 7.6 | 0.6 | 7.0  | 1.1 | 0.4 | 0.9 | 0.84252 | 2115.3 | 16.4 | 2109.5 | 9.6  | 2103.9 | 10.2 | -0.5 |
| Spot 293 | 80  | 23352.5   | 0.9 | 8.2 | 0.5 | 5.6  | 0.8 | 0.3 | 0.7 | 0.77990 | 1883.5 | 10.7 | 1917.1 | 7.3  | 1953.6 | 9.4  | 3.6  |
| Spot 294 | 88  | 39092.8   | 2.0 | 8.5 | 0.4 | 5.5  | 0.7 | 0.3 | 0.6 | 0.83578 | 1914.0 | 10.4 | 1904.8 | 6.4  | 1894.8 | 7.4  | -1.0 |
| Spot 295 | 60  | 15397.6   | 2.8 | 5.2 | 0.6 | 14.1 | 0.9 | 0.5 | 0.7 | 0.79514 | 2781.7 | 16.9 | 2759.5 | 8.9  | 2743.4 | 9.4  | -1.4 |
| Spot 296 | 67  | 93509.7   | 2.6 | 7.5 | 0.7 | 7.2  | 1.4 | 0.4 | 1.2 | 0.84673 | 2153.2 | 21.2 | 2130.8 | 12.2 | 2109.3 | 12.8 | -2.1 |
| Spot 297 | 127 | 570803.6  | 1.3 | 4.2 | 0.6 | 20.2 | 1.1 | 0.6 | 0.9 | 0.86127 | 3125.0 | 23.5 | 3102.3 | 10.7 | 3087.6 | 8.9  | -1.2 |
| Spot 298 | 48  | 53038.0   | 2.8 | 7.6 | 0.7 | 7.0  | 1.1 | 0.4 | 0.8 | 0.74000 | 2119.6 | 14.4 | 2107.0 | 9.6  | 2094.6 | 12.7 | -1.2 |
| Spot 299 | 97  | 58064.5   | 2.9 | 7.3 | 0.6 | 7.4  | 1.0 | 0.4 | 0.9 | 0.82718 | 2173.3 | 15.7 | 2163.1 | 9.2  | 2153.5 | 10.1 | -0.9 |

|                    |     |           |     |     |     |      |     |     |     |         |        |      |        |      |        |      |      |
|--------------------|-----|-----------|-----|-----|-----|------|-----|-----|-----|---------|--------|------|--------|------|--------|------|------|
| Spot 301           | 44  | 349684.6  | 2.0 | 7.2 | 0.6 | 7.6  | 1.3 | 0.4 | 1.1 | 0.86611 | 2190.6 | 20.7 | 2184.6 | 11.5 | 2178.9 | 11.2 | -0.5 |
| Spot 302           | 51  | 10073.1   | 1.8 | 6.8 | 1.3 | 7.8  | 1.5 | 0.4 | 0.7 | 0.45864 | 2156.5 | 12.2 | 2210.8 | 13.1 | 2261.5 | 22.3 | 4.6  |
| Spot 303           | 53  | 44499.2   | 1.0 | 7.4 | 0.8 | 7.6  | 1.3 | 0.4 | 1.0 | 0.78632 | 2228.4 | 18.7 | 2180.8 | 11.3 | 2136.4 | 13.6 | -4.3 |
| Spot 304           | 99  | 90878.4   | 2.3 | 5.5 | 0.8 | 12.4 | 1.3 | 0.5 | 1.0 | 0.77188 | 2624.7 | 20.8 | 2633.2 | 11.8 | 2639.6 | 13.2 | 0.6  |
| Spot 305           | 49  | 1087638.6 | 1.9 | 7.7 | 0.7 | 6.9  | 1.0 | 0.4 | 0.8 | 0.74553 | 2126.0 | 14.0 | 2098.4 | 9.2  | 2071.4 | 12.2 | -2.6 |
| Spot 306           | 95  | 546324.6  | 2.8 | 8.6 | 0.5 | 5.6  | 1.0 | 0.4 | 0.8 | 0.84593 | 1937.6 | 14.1 | 1910.4 | 8.5  | 1881.0 | 9.5  | -3.0 |
| Spot 307           | 63  | 2730034.7 | 2.2 | 7.6 | 0.6 | 7.1  | 1.1 | 0.4 | 0.9 | 0.82872 | 2157.5 | 17.4 | 2120.4 | 10.2 | 2084.5 | 11.3 | -3.5 |
| Spot 308           | 103 | 66840.3   | 1.4 | 6.8 | 0.7 | 8.5  | 1.4 | 0.4 | 1.2 | 0.86829 | 2275.7 | 23.6 | 2282.4 | 12.9 | 2288.5 | 12.1 | 0.6  |
| Spot 309           | 29  | 26651.0   | 2.0 | 6.7 | 1.8 | 8.3  | 2.1 | 0.4 | 1.0 | 0.50081 | 2206.7 | 19.4 | 2262.0 | 18.8 | 2312.4 | 30.8 | 4.6  |
| Spot 310           | 30  | 138489.9  | 2.4 | 7.1 | 0.7 | 8.1  | 1.4 | 0.4 | 1.2 | 0.85224 | 2287.8 | 23.0 | 2244.0 | 12.7 | 2204.2 | 12.8 | -3.8 |
| Spot 311           | 85  | 127463.0  | 1.1 | 7.9 | 0.6 | 6.5  | 1.2 | 0.4 | 1.1 | 0.87874 | 2053.5 | 19.1 | 2042.3 | 10.9 | 2030.9 | 10.4 | -1.1 |
| Spot 312           | 127 | 33916.5   | 1.5 | 8.2 | 0.5 | 5.5  | 1.0 | 0.3 | 0.9 | 0.86401 | 1843.2 | 14.1 | 1897.7 | 8.7  | 1957.8 | 9.2  | 5.9  |
| Spot 313           | 90  | 69530.4   | 2.5 | 5.1 | 0.6 | 14.4 | 1.0 | 0.5 | 0.8 | 0.82695 | 2775.0 | 18.9 | 2773.2 | 9.6  | 2771.9 | 9.4  | -0.1 |
| Spot 314           | 116 | 102764.3  | 4.7 | 7.3 | 0.6 | 7.6  | 1.0 | 0.4 | 0.8 | 0.81885 | 2200.7 | 14.8 | 2186.1 | 8.7  | 2172.3 | 9.7  | -1.3 |
| Spot 315           | 110 | 55917.5   | 2.5 | 8.5 | 0.5 | 5.5  | 0.8 | 0.3 | 0.7 | 0.81175 | 1921.3 | 11.4 | 1906.0 | 7.3  | 1889.3 | 8.9  | -1.7 |
| Run 1 (discordant) |     |           |     |     |     |      |     |     |     |         |        |      |        |      |        |      |      |
| Spot 11            | 48  | 91490.3   | 4.2 | 7.5 | 0.8 | 7.8  | 1.2 | 0.4 | 0.9 | 0.75436 | 2266.1 | 17.2 | 2204.6 | 10.7 | 2147.8 | 13.7 | -5.5 |
| Spot 20            | 79  | 78127.7   | 2.0 | 7.7 | 0.5 | 7.3  | 0.9 | 0.4 | 0.7 | 0.80372 | 2198.9 | 13.4 | 2145.0 | 8.0  | 2093.7 | 9.4  | -5.0 |
| Spot 290           | 25  | 34915.6   | 2.4 | 8.8 | 0.8 | 5.7  | 1.3 | 0.4 | 1.0 | 0.79035 | 1998.6 | 17.9 | 1931.0 | 11.4 | 1859.1 | 14.6 | -7.5 |
| Spot 41            | 48  | 112086.1  | 2.6 | 8.8 | 0.6 | 5.6  | 1.0 | 0.4 | 0.8 | 0.77982 | 1960.5 | 13.6 | 1915.2 | 8.9  | 1866.4 | 11.7 | -5.0 |
| Run 2              |     |           |     |     |     |      |     |     |     |         |        |      |        |      |        |      |      |
| Spot 1             | 142 | 115833.2  | 1.5 | 8.4 | 0.6 | 5.6  | 1.3 | 0.3 | 1.1 | 0.87690 | 1906.2 | 18.7 | 1910.1 | 11.1 | 1914.3 | 11.1 | 0.4  |
| Spot 2             | 78  | 56335.3   | 2.7 | 5.4 | 0.5 | 13.5 | 1.2 | 0.5 | 1.1 | 0.90729 | 2767.9 | 25.0 | 2713.8 | 11.6 | 2673.8 | 8.5  | -3.5 |
| Spot 3             | 166 | 68211.0   | 1.6 | 8.5 | 0.7 | 5.5  | 1.7 | 0.3 | 1.5 | 0.91304 | 1908.2 | 25.1 | 1904.7 | 14.3 | 1901.0 | 12.2 | -0.4 |
| Spot 5             | 80  | 17602.8   | 2.3 | 7.4 | 0.4 | 7.4  | 0.7 | 0.4 | 0.6 | 0.82779 | 2171.4 | 11.2 | 2159.7 | 6.6  | 2148.6 | 7.2  | -1.1 |
| Spot 6             | 80  | 1222578.3 | 2.9 | 5.5 | 0.6 | 13.4 | 1.3 | 0.5 | 1.2 | 0.88789 | 2769.6 | 26.5 | 2710.2 | 12.5 | 2666.2 | 10.1 | -3.9 |
| Spot 7             | 91  | 37800.9   | 1.8 | 5.6 | 0.6 | 11.6 | 1.2 | 0.5 | 1.0 | 0.86550 | 2523.8 | 21.8 | 2570.0 | 11.3 | 2606.7 | 10.1 | 3.2  |
| Spot 8             | 92  | 44614.7   | 2.3 | 8.3 | 0.6 | 4.9  | 1.1 | 0.3 | 0.9 | 0.82717 | 1675.8 | 13.5 | 1798.1 | 9.3  | 1943.1 | 11.1 | 13.8 |
| Spot 9             | 87  | 122205.7  | 2.4 | 8.4 | 0.7 | 5.7  | 1.2 | 0.3 | 1.0 | 0.82287 | 1919.9 | 16.5 | 1923.8 | 10.4 | 1928.1 | 12.3 | 0.4  |
| Spot 10            | 71  | 15702.8   | 1.6 | 7.7 | 0.7 | 6.4  | 1.0 | 0.4 | 0.7 | 0.71187 | 1990.6 | 12.4 | 2036.1 | 8.9  | 2082.5 | 12.6 | 4.4  |
| Spot 11            | 111 | 14728.3   | 1.8 | 5.2 | 0.4 | 13.6 | 0.9 | 0.5 | 0.8 | 0.87674 | 2690.8 | 16.7 | 2722.3 | 8.2  | 2745.7 | 6.9  | 2.0  |
| Spot 12            | 74  | 190142.2  | 2.2 | 8.5 | 0.7 | 5.7  | 1.2 | 0.4 | 0.9 | 0.78387 | 1953.0 | 15.9 | 1928.1 | 10.4 | 1901.5 | 13.4 | -2.7 |
| Spot 13            | 64  | 115907.2  | 3.3 | 7.6 | 0.8 | 7.2  | 1.1 | 0.4 | 0.8 | 0.70528 | 2168.7 | 14.7 | 2140.9 | 10.1 | 2114.2 | 14.1 | -2.6 |
| Spot 14            | 100 | 184651.4  | 2.3 | 7.4 | 0.7 | 7.2  | 1.2 | 0.4 | 0.9 | 0.80967 | 2134.6 | 17.0 | 2139.3 | 10.3 | 2143.9 | 11.9 | 0.4  |
| Spot 15            | 59  | 151211.4  | 1.3 | 7.3 | 0.6 | 7.7  | 1.1 | 0.4 | 0.9 | 0.82768 | 2205.7 | 17.5 | 2191.5 | 10.1 | 2178.2 | 11.0 | -1.3 |
| Spot 16            | 28  | 1993352.2 | 2.5 | 5.3 | 0.7 | 13.0 | 1.1 | 0.5 | 0.8 | 0.76441 | 2625.3 | 18.0 | 2679.2 | 10.3 | 2720.2 | 11.6 | 3.5  |
| Spot 17            | 129 | 23012.8   | 1.7 | 8.1 | 0.9 | 5.7  | 1.4 | 0.3 | 1.1 | 0.78049 | 1873.7 | 17.8 | 1931.0 | 12.1 | 1993.2 | 15.6 | 6.0  |
| Spot 18            | 109 | 88996.3   | 0.9 | 7.7 | 0.5 | 6.8  | 1.0 | 0.4 | 0.8 | 0.84241 | 2082.9 | 14.7 | 2084.5 | 8.7  | 2086.0 | 9.3  | 0.1  |
| Spot 19            | 111 | 44186.3   | 2.4 | 8.2 | 0.7 | 5.6  | 1.1 | 0.3 | 0.9 | 0.78454 | 1889.6 | 14.2 | 1922.1 | 9.5  | 1957.3 | 12.2 | 3.5  |
| Spot 20            | 71  | 179624.3  | 2.8 | 5.4 | 0.6 | 13.2 | 0.9 | 0.5 | 0.7 | 0.78328 | 2693.7 | 16.0 | 2693.2 | 8.8  | 2692.8 | 9.5  | 0.0  |
| Spot 21            | 47  | 22835.7   | 2.1 | 5.5 | 0.6 | 12.8 | 1.0 | 0.5 | 0.8 | 0.82776 | 2681.2 | 17.9 | 2667.6 | 9.3  | 2657.4 | 9.2  | -0.9 |
| Spot 22            | 81  | 18540.2   | 1.1 | 8.1 | 1.1 | 5.3  | 1.4 | 0.3 | 0.8 | 0.56034 | 1788.6 | 12.1 | 1874.7 | 11.8 | 1971.5 | 20.4 | 9.3  |
| Spot 23            | 91  | 21713.3   | 3.3 | 7.2 | 0.6 | 7.4  | 1.1 | 0.4 | 0.9 | 0.84557 | 2126.7 | 16.3 | 2163.2 | 9.5  | 2197.9 | 9.9  | 3.2  |



|         |     |           |     |     |     |      |     |     |     |         |        |      |        |      |        |      |      |
|---------|-----|-----------|-----|-----|-----|------|-----|-----|-----|---------|--------|------|--------|------|--------|------|------|
| Spot 24 | 92  | 69578.7   | 2.7 | 8.4 | 0.7 | 5.6  | 1.1 | 0.3 | 0.9 | 0.78281 | 1907.7 | 14.5 | 1915.4 | 9.7  | 1923.7 | 12.5 | 0.8  |
| Spot 26 | 117 | 9603.0    | 2.0 | 6.3 | 1.5 | 9.1  | 1.8 | 0.4 | 1.0 | 0.56415 | 2283.4 | 19.3 | 2352.8 | 16.3 | 2413.6 | 25.0 | 5.4  |
| Spot 27 | 107 | 20460.8   | 1.9 | 8.1 | 0.8 | 5.9  | 1.1 | 0.3 | 0.7 | 0.67096 | 1922.8 | 11.9 | 1955.6 | 9.3  | 1990.6 | 14.1 | 3.4  |
| Spot 28 | 168 | 94904.0   | 2.6 | 7.1 | 0.7 | 7.8  | 1.3 | 0.4 | 1.2 | 0.86219 | 2197.2 | 21.5 | 2206.9 | 12.0 | 2215.9 | 11.8 | 0.8  |
| Spot 29 | 115 | 50944.2   | 2.2 | 8.4 | 0.6 | 5.6  | 1.2 | 0.3 | 1.0 | 0.83013 | 1908.8 | 16.0 | 1911.6 | 10.0 | 1914.6 | 11.7 | 0.3  |
| Spot 30 | 120 | 596954.4  | 2.0 | 7.2 | 0.5 | 7.8  | 1.0 | 0.4 | 0.9 | 0.84496 | 2217.6 | 16.0 | 2208.5 | 9.1  | 2200.2 | 9.4  | -0.8 |
| Spot 31 | 120 | 20353.7   | 2.2 | 7.1 | 0.7 | 7.6  | 1.9 | 0.4 | 1.8 | 0.92523 | 2159.2 | 32.8 | 2184.0 | 17.3 | 2207.4 | 12.7 | 2.2  |
| Spot 32 | 82  | 64820.8   | 2.5 | 7.5 | 0.4 | 7.3  | 1.0 | 0.4 | 0.9 | 0.89378 | 2176.5 | 16.1 | 2150.3 | 8.7  | 2125.3 | 7.7  | -2.4 |
| Spot 34 | 100 | 30765.8   | 1.9 | 8.2 | 0.8 | 5.6  | 1.3 | 0.3 | 1.1 | 0.80416 | 1875.2 | 17.4 | 1921.6 | 11.5 | 1971.9 | 14.1 | 4.9  |
| Spot 35 | 65  | 121370.8  | 1.1 | 5.4 | 0.5 | 12.9 | 0.9 | 0.5 | 0.7 | 0.78849 | 2664.9 | 15.0 | 2675.1 | 8.2  | 2682.9 | 8.9  | 0.7  |
| Spot 36 | 56  | 120369.1  | 1.8 | 5.7 | 0.6 | 12.1 | 1.3 | 0.5 | 1.2 | 0.88350 | 2632.0 | 25.2 | 2612.7 | 12.4 | 2597.7 | 10.3 | -1.3 |
| Spot 37 | 102 | 170002.2  | 2.2 | 5.4 | 0.3 | 13.2 | 0.7 | 0.5 | 0.6 | 0.88204 | 2732.6 | 14.5 | 2696.7 | 7.0  | 2669.9 | 5.7  | -2.4 |
| Spot 38 | 50  | 111264.7  | 2.2 | 7.1 | 0.8 | 7.8  | 1.5 | 0.4 | 1.2 | 0.83401 | 2211.3 | 22.8 | 2210.1 | 13.1 | 2209.1 | 14.0 | -0.1 |
| Spot 39 | 69  | 97383.4   | 2.7 | 7.1 | 0.8 | 8.0  | 1.1 | 0.4 | 0.7 | 0.65888 | 2250.8 | 13.2 | 2232.1 | 9.5  | 2215.1 | 13.7 | -1.6 |
| Spot 40 | 121 | 39290.1   | 1.1 | 8.4 | 0.6 | 5.6  | 1.0 | 0.3 | 0.8 | 0.76466 | 1910.0 | 12.4 | 1912.0 | 8.5  | 1914.1 | 11.4 | 0.2  |
| Spot 42 | 149 | 97091.7   | 2.2 | 8.5 | 0.6 | 5.5  | 1.2 | 0.3 | 1.0 | 0.86934 | 1891.7 | 16.5 | 1895.6 | 9.9  | 1899.9 | 10.3 | 0.4  |
| Spot 43 | 91  | 58948.4   | 2.2 | 8.6 | 0.6 | 5.5  | 1.2 | 0.3 | 1.1 | 0.88037 | 1931.9 | 18.2 | 1903.2 | 10.6 | 1872.1 | 10.6 | -3.2 |
| Spot 44 | 75  | 1133305.5 | 2.2 | 8.4 | 0.5 | 5.7  | 1.1 | 0.4 | 1.0 | 0.91100 | 1956.9 | 16.9 | 1936.8 | 9.5  | 1915.3 | 8.2  | -2.2 |
| Spot 45 | 74  | 105735.8  | 2.1 | 7.6 | 0.5 | 7.2  | 1.1 | 0.4 | 1.0 | 0.88225 | 2161.3 | 18.1 | 2131.8 | 10.0 | 2103.5 | 9.3  | -2.7 |
| Spot 46 | 76  | 109310.5  | 2.6 | 5.4 | 0.6 | 13.2 | 1.2 | 0.5 | 1.1 | 0.87145 | 2711.9 | 23.3 | 2695.4 | 11.4 | 2682.9 | 9.8  | -1.1 |
| Spot 47 | 131 | 94988.5   | 1.5 | 7.2 | 0.6 | 7.7  | 1.0 | 0.4 | 0.9 | 0.84131 | 2202.8 | 16.2 | 2202.4 | 9.3  | 2201.9 | 9.7  | 0.0  |
| Spot 48 | 91  | 250557.6  | 2.5 | 5.5 | 0.6 | 13.3 | 0.9 | 0.5 | 0.7 | 0.80300 | 2743.0 | 16.8 | 2697.9 | 8.8  | 2664.3 | 9.2  | -3.0 |
| Spot 50 | 52  | 221999.8  | 1.7 | 6.9 | 0.8 | 8.3  | 1.5 | 0.4 | 1.3 | 0.84714 | 2270.3 | 24.7 | 2265.9 | 13.8 | 2261.8 | 14.0 | -0.4 |
| Spot 51 | 111 | 235994.3  | 3.1 | 6.2 | 0.4 | 10.4 | 1.1 | 0.5 | 1.0 | 0.91802 | 2500.6 | 21.0 | 2470.0 | 10.2 | 2444.8 | 7.4  | -2.3 |
| Spot 52 | 126 | 166780.1  | 3.6 | 8.5 | 0.7 | 5.4  | 1.3 | 0.3 | 1.1 | 0.85775 | 1871.1 | 17.9 | 1880.8 | 11.0 | 1891.5 | 11.9 | 1.1  |
| Spot 53 | 92  | 836543.2  | 2.6 | 8.5 | 0.7 | 5.4  | 1.2 | 0.3 | 1.0 | 0.83111 | 1893.4 | 16.3 | 1891.3 | 10.2 | 1888.9 | 11.9 | -0.2 |
| Spot 54 | 51  | 3154480.4 | 1.7 | 6.9 | 0.7 | 8.3  | 1.1 | 0.4 | 0.8 | 0.75049 | 2273.9 | 15.6 | 2264.7 | 9.8  | 2256.4 | 12.4 | -0.8 |
| Spot 55 | 100 | 1870801.7 | 0.9 | 7.3 | 0.6 | 7.4  | 1.1 | 0.4 | 0.9 | 0.81826 | 2160.6 | 16.4 | 2160.1 | 9.8  | 2159.7 | 11.0 | 0.0  |
| Spot 56 | 91  | 102978.4  | 1.5 | 7.2 | 0.7 | 7.7  | 1.2 | 0.4 | 0.9 | 0.78935 | 2209.5 | 17.1 | 2194.0 | 10.4 | 2179.5 | 12.4 | -1.4 |
| Spot 57 | 110 | 431116.9  | 2.5 | 8.4 | 0.6 | 5.7  | 1.4 | 0.4 | 1.2 | 0.89404 | 1935.5 | 20.3 | 1930.1 | 11.8 | 1924.3 | 10.9 | -0.6 |
| Spot 58 | 69  | 267616.0  | 3.1 | 5.5 | 0.5 | 12.8 | 0.9 | 0.5 | 0.7 | 0.80989 | 2669.4 | 16.3 | 2663.5 | 8.7  | 2659.0 | 9.0  | -0.4 |
| Spot 59 | 114 | 715187.0  | 2.6 | 4.6 | 0.7 | 16.9 | 1.2 | 0.6 | 1.0 | 0.82990 | 2930.7 | 23.0 | 2931.8 | 11.3 | 2932.6 | 10.6 | 0.1  |
| Spot 60 | 72  | 3754523.2 | 1.9 | 7.7 | 0.5 | 6.9  | 1.1 | 0.4 | 1.0 | 0.88258 | 2124.2 | 18.3 | 2103.0 | 10.2 | 2082.3 | 9.5  | -2.0 |
| Spot 61 | 76  | 71735.9   | 2.6 | 5.3 | 0.6 | 13.5 | 1.1 | 0.5 | 0.9 | 0.83614 | 2729.4 | 19.6 | 2717.0 | 10.0 | 2707.8 | 9.5  | -0.8 |
| Spot 62 | 72  | 114036.8  | 2.5 | 8.2 | 0.8 | 6.2  | 1.4 | 0.4 | 1.2 | 0.83945 | 2030.1 | 20.8 | 1998.3 | 12.4 | 1965.6 | 13.8 | -3.3 |
| Spot 63 | 99  | 55943.0   | 1.0 | 8.3 | 0.7 | 5.5  | 1.0 | 0.3 | 0.8 | 0.74757 | 1858.4 | 12.6 | 1897.4 | 8.9  | 1940.2 | 12.4 | 4.2  |
| Spot 64 | 75  | 48460.2   | 1.4 | 8.3 | 0.7 | 5.8  | 1.2 | 0.4 | 1.0 | 0.82605 | 1966.7 | 17.4 | 1952.0 | 10.8 | 1936.5 | 12.5 | -1.6 |
| Spot 65 | 100 | 240113.1  | 2.8 | 8.6 | 0.6 | 5.4  | 1.0 | 0.3 | 0.8 | 0.81490 | 1880.0 | 13.6 | 1881.1 | 8.7  | 1882.3 | 10.6 | 0.1  |
| Spot 66 | 101 | 58618.0   | 4.5 | 7.5 | 0.6 | 7.4  | 1.1 | 0.4 | 0.9 | 0.85037 | 2197.0 | 17.6 | 2159.3 | 9.9  | 2123.6 | 10.2 | -3.5 |
| Spot 67 | 134 | 13251.9   | 1.5 | 7.8 | 0.6 | 6.0  | 1.0 | 0.3 | 0.7 | 0.75798 | 1928.2 | 12.2 | 1975.8 | 8.4  | 2025.9 | 11.1 | 4.8  |
| Spot 68 | 69  | 50984.8   | 1.2 | 7.5 | 0.8 | 7.0  | 1.3 | 0.4 | 1.0 | 0.79527 | 2091.8 | 18.7 | 2105.7 | 11.7 | 2119.2 | 14.0 | 1.3  |
| Spot 69 | 71  | 1369321.2 | 2.4 | 7.7 | 0.6 | 6.9  | 1.2 | 0.4 | 1.1 | 0.86857 | 2125.9 | 19.5 | 2102.0 | 11.0 | 2078.6 | 10.8 | -2.3 |
| Spot 70 | 80  | 52259.8   | 2.2 | 8.5 | 0.6 | 5.5  | 1.1 | 0.3 | 1.0 | 0.82889 | 1905.5 | 15.7 | 1896.2 | 9.9  | 1886.1 | 11.6 | -1.0 |

|          |     |          |     |     |     |      |     |     |     |         |        |      |        |      |        |      |      |
|----------|-----|----------|-----|-----|-----|------|-----|-----|-----|---------|--------|------|--------|------|--------|------|------|
| Spot 72  | 108 | 554826.9 | 1.5 | 4.2 | 0.5 | 20.5 | 1.1 | 0.6 | 0.9 | 0.86662 | 3127.3 | 23.2 | 3114.6 | 10.5 | 3106.4 | 8.6  | -0.7 |
| Spot 73  | 122 | 107599.4 | 2.4 | 8.4 | 0.6 | 5.6  | 1.2 | 0.3 | 1.1 | 0.87362 | 1915.1 | 17.8 | 1913.7 | 10.6 | 1912.1 | 10.7 | -0.2 |
| Spot 74  | 90  | 36094.7  | 1.5 | 8.4 | 0.5 | 5.8  | 1.0 | 0.4 | 0.8 | 0.83752 | 1964.9 | 13.9 | 1945.7 | 8.5  | 1925.3 | 9.6  | -2.1 |
| Spot 75  | 88  | 53566.6  | 2.9 | 7.1 | 0.5 | 7.9  | 1.1 | 0.4 | 1.0 | 0.88723 | 2243.7 | 18.9 | 2224.4 | 10.2 | 2206.6 | 9.0  | -1.7 |
| Spot 76  | 146 | 19254.4  | 3.8 | 8.0 | 0.6 | 5.8  | 1.0 | 0.3 | 0.8 | 0.78740 | 1911.7 | 13.2 | 1953.8 | 8.8  | 1998.7 | 11.1 | 4.4  |
| Spot 77  | 87  | 103553.5 | 1.2 | 7.4 | 0.7 | 7.4  | 1.2 | 0.4 | 1.0 | 0.82586 | 2170.5 | 17.7 | 2158.1 | 10.4 | 2146.3 | 11.5 | -1.1 |
| Spot 78  | 207 | 126722.9 | 3.1 | 7.4 | 0.4 | 7.1  | 0.9 | 0.4 | 0.8 | 0.90092 | 2122.0 | 14.2 | 2129.8 | 7.8  | 2137.3 | 6.6  | 0.7  |
| Spot 80  | 120 | 33709.2  | 2.4 | 5.5 | 0.5 | 12.5 | 1.1 | 0.5 | 1.0 | 0.91086 | 2622.2 | 21.9 | 2639.5 | 10.5 | 2652.8 | 7.6  | 1.2  |
| Spot 81  | 142 | 107177.0 | 2.5 | 8.5 | 0.5 | 5.5  | 1.0 | 0.3 | 0.8 | 0.83627 | 1901.8 | 13.4 | 1898.2 | 8.3  | 1894.2 | 9.6  | -0.4 |
| Spot 82  | 118 | 23287.2  | 1.3 | 8.2 | 1.0 | 5.7  | 1.3 | 0.3 | 0.9 | 0.69935 | 1888.8 | 15.4 | 1925.6 | 11.6 | 1965.4 | 17.2 | 3.9  |
| Spot 83  | 68  | 96689.6  | 2.1 | 8.5 | 0.7 | 5.6  | 1.1 | 0.4 | 0.8 | 0.72306 | 1949.0 | 12.9 | 1922.8 | 9.1  | 1894.5 | 13.2 | -2.9 |
| Spot 84  | 136 | 104338.2 | 2.0 | 7.4 | 0.6 | 7.3  | 1.0 | 0.4 | 0.9 | 0.83701 | 2171.1 | 15.7 | 2151.9 | 9.1  | 2133.6 | 9.7  | -1.8 |
| Spot 85  | 81  | 154720.7 | 0.9 | 5.2 | 0.6 | 13.7 | 1.0 | 0.5 | 0.8 | 0.76957 | 2736.0 | 16.9 | 2730.2 | 9.3  | 2725.9 | 10.4 | -0.4 |
| Spot 86  | 70  | 137528.0 | 2.0 | 7.5 | 0.7 | 7.2  | 1.1 | 0.4 | 0.9 | 0.79642 | 2152.8 | 15.8 | 2133.9 | 9.6  | 2115.8 | 11.5 | -1.7 |
| Spot 87  | 78  | 201202.6 | 1.9 | 8.6 | 0.6 | 5.4  | 1.2 | 0.3 | 1.0 | 0.85196 | 1891.5 | 16.2 | 1887.5 | 9.9  | 1883.0 | 10.9 | -0.5 |
| Spot 88  | 113 | 92438.5  | 2.3 | 8.5 | 0.5 | 5.5  | 1.1 | 0.3 | 0.9 | 0.86788 | 1896.3 | 15.4 | 1893.4 | 9.3  | 1890.2 | 9.7  | -0.3 |
| Spot 89  | 82  | 668086.7 | 2.4 | 5.6 | 0.6 | 12.3 | 1.1 | 0.5 | 0.9 | 0.83206 | 2628.0 | 20.5 | 2628.7 | 10.7 | 2629.3 | 10.5 | 0.0  |
| Spot 90  | 78  | 216451.9 | 0.9 | 7.6 | 0.7 | 7.1  | 1.2 | 0.4 | 1.0 | 0.81351 | 2152.2 | 17.9 | 2127.8 | 10.7 | 2104.2 | 12.2 | -2.3 |
| Spot 91  | 97  | 120036.7 | 2.5 | 7.2 | 0.4 | 7.8  | 0.7 | 0.4 | 0.5 | 0.79746 | 2217.5 | 10.1 | 2207.1 | 6.1  | 2197.5 | 7.1  | -0.9 |
| Spot 92  | 79  | 118644.2 | 2.9 | 7.5 | 0.6 | 7.2  | 1.0 | 0.4 | 0.8 | 0.76560 | 2141.9 | 14.0 | 2131.0 | 8.9  | 2120.5 | 11.3 | -1.0 |
| Spot 93  | 141 | 229277.5 | 1.9 | 8.0 | 0.7 | 6.0  | 1.2 | 0.4 | 1.0 | 0.84687 | 1962.9 | 17.7 | 1982.1 | 10.8 | 2002.1 | 11.7 | 2.0  |
| Spot 94  | 89  | 51994.4  | 2.3 | 8.4 | 0.6 | 5.7  | 1.0 | 0.3 | 0.9 | 0.82197 | 1930.0 | 14.3 | 1924.1 | 9.0  | 1917.8 | 10.7 | -0.6 |
| Spot 95  | 67  | 94143.8  | 2.8 | 8.5 | 0.7 | 5.5  | 1.2 | 0.3 | 1.0 | 0.83475 | 1914.6 | 17.2 | 1905.7 | 10.7 | 1895.9 | 12.3 | -1.0 |
| Spot 96  | 117 | 90538.7  | 3.6 | 7.2 | 0.5 | 7.8  | 1.0 | 0.4 | 0.8 | 0.83779 | 2232.8 | 15.6 | 2213.8 | 8.9  | 2196.2 | 9.4  | -1.7 |
| Spot 97  | 132 | 117874.8 | 3.0 | 8.6 | 0.5 | 5.7  | 1.2 | 0.4 | 1.1 | 0.89987 | 1961.9 | 18.7 | 1927.3 | 10.6 | 1890.1 | 9.6  | -3.8 |
| Spot 98  | 104 | 164648.1 | 2.5 | 7.4 | 0.6 | 7.4  | 1.2 | 0.4 | 1.0 | 0.83324 | 2169.4 | 18.0 | 2155.4 | 10.5 | 2142.0 | 11.3 | -1.3 |
| Spot 99  | 58  | 48182.5  | 1.9 | 8.3 | 0.6 | 5.8  | 0.9 | 0.4 | 0.7 | 0.77329 | 1944.9 | 12.3 | 1942.5 | 8.2  | 1940.0 | 10.7 | -0.3 |
| Spot 100 | 108 | 35729.2  | 2.0 | 8.3 | 0.6 | 5.6  | 1.0 | 0.3 | 0.9 | 0.83290 | 1895.9 | 14.0 | 1912.2 | 8.8  | 1929.8 | 10.2 | 1.8  |
| Spot 101 | 82  | 23713.2  | 2.2 | 8.0 | 0.8 | 6.0  | 1.1 | 0.4 | 0.8 | 0.72417 | 1963.9 | 13.8 | 1980.8 | 9.8  | 1998.5 | 13.8 | 1.7  |
| Spot 102 | 117 | 156717.0 | 2.5 | 7.7 | 0.6 | 6.8  | 1.2 | 0.4 | 1.1 | 0.86219 | 2095.1 | 19.1 | 2089.9 | 11.0 | 2084.7 | 11.0 | -0.5 |
| Spot 103 | 101 | 825751.1 | 2.0 | 7.6 | 0.7 | 7.1  | 1.1 | 0.4 | 0.8 | 0.73762 | 2138.5 | 14.6 | 2121.4 | 9.7  | 2104.9 | 12.9 | -1.6 |
| Spot 104 | 131 | 116959.8 | 2.5 | 5.4 | 0.5 | 12.9 | 1.1 | 0.5 | 1.0 | 0.89233 | 2676.8 | 22.4 | 2672.9 | 10.8 | 2670.0 | 8.6  | -0.3 |
| Spot 105 | 87  | 18530.4  | 3.3 | 5.4 | 0.7 | 12.8 | 1.2 | 0.5 | 1.0 | 0.80764 | 2669.0 | 22.0 | 2667.8 | 11.7 | 2666.8 | 12.2 | -0.1 |
| Spot 107 | 15  | 17247.6  | 3.0 | 7.4 | 1.0 | 7.4  | 1.5 | 0.4 | 1.1 | 0.75581 | 2185.2 | 21.2 | 2162.5 | 13.6 | 2141.0 | 17.3 | -2.1 |
| Spot 108 | 86  | 245022.8 | 2.5 | 5.4 | 0.6 | 13.4 | 1.1 | 0.5 | 0.9 | 0.82793 | 2743.3 | 19.9 | 2707.0 | 10.2 | 2679.9 | 10.0 | -2.4 |
| Spot 109 | 80  | 30837.0  | 1.5 | 7.2 | 0.6 | 7.7  | 1.0 | 0.4 | 0.8 | 0.79591 | 2194.3 | 14.6 | 2197.2 | 8.8  | 2200.0 | 10.4 | 0.3  |
| Spot 110 | 110 | 74510.3  | 2.4 | 8.5 | 0.6 | 5.5  | 1.0 | 0.3 | 0.8 | 0.82495 | 1921.3 | 13.5 | 1907.8 | 8.5  | 1893.1 | 10.0 | -1.5 |
| Spot 111 | 52  | 53873.0  | 1.2 | 8.3 | 0.6 | 5.8  | 1.1 | 0.4 | 0.9 | 0.82460 | 1956.4 | 15.9 | 1949.2 | 9.9  | 1941.6 | 11.5 | -0.8 |
| Spot 112 | 91  | 273112.6 | 1.5 | 8.2 | 0.7 | 6.0  | 1.2 | 0.4 | 1.0 | 0.81048 | 1985.2 | 16.8 | 1971.1 | 10.5 | 1956.3 | 12.7 | -1.5 |
| Spot 113 | 114 | 39060.5  | 2.3 | 8.1 | 0.8 | 6.1  | 1.3 | 0.4 | 1.1 | 0.81048 | 1991.7 | 18.3 | 1985.0 | 11.5 | 1978.0 | 13.7 | -0.7 |
| Spot 114 | 87  | 142675.8 | 2.1 | 5.5 | 0.5 | 12.9 | 0.9 | 0.5 | 0.7 | 0.82842 | 2696.3 | 16.2 | 2675.4 | 8.4  | 2659.7 | 8.2  | -1.4 |
| Spot 115 | 35  | 96388.3  | 1.3 | 4.4 | 0.5 | 18.5 | 1.2 | 0.6 | 1.1 | 0.89712 | 3029.1 | 26.2 | 3018.1 | 11.6 | 3010.7 | 8.6  | -0.6 |
| Spot 116 | 88  | 95327.8  | 1.8 | 5.5 | 0.6 | 12.7 | 1.0 | 0.5 | 0.8 | 0.81394 | 2664.9 | 17.1 | 2659.9 | 9.0  | 2656.0 | 9.3  | -0.3 |

|          |     |          |     |     |     |      |     |     |     |         |        |      |        |      |        |      |      |
|----------|-----|----------|-----|-----|-----|------|-----|-----|-----|---------|--------|------|--------|------|--------|------|------|
| Spot 117 | 169 | 65174.4  | 1.6 | 5.4 | 0.4 | 12.7 | 1.0 | 0.5 | 0.9 | 0.91365 | 2627.4 | 19.4 | 2654.8 | 9.2  | 2675.8 | 6.6  | 1.8  |
| Spot 118 | 80  | 317389.8 | 2.4 | 5.4 | 0.6 | 12.8 | 1.2 | 0.5 | 1.0 | 0.87087 | 2659.4 | 22.5 | 2664.5 | 11.2 | 2668.4 | 9.6  | 0.3  |
| Spot 119 | 128 | 75365.5  | 2.2 | 5.5 | 0.6 | 12.5 | 1.0 | 0.5 | 0.8 | 0.81745 | 2631.8 | 17.9 | 2644.1 | 9.5  | 2653.5 | 9.7  | 0.8  |
| Spot 120 | 101 | 632519.9 | 2.1 | 8.4 | 0.6 | 5.7  | 1.1 | 0.4 | 0.9 | 0.83044 | 1951.8 | 14.8 | 1936.0 | 9.2  | 1919.2 | 10.6 | -1.7 |
| Spot 121 | 58  | 59527.5  | 1.1 | 8.1 | 0.7 | 6.4  | 1.3 | 0.4 | 1.1 | 0.85752 | 2071.3 | 20.0 | 2032.8 | 11.6 | 1993.9 | 12.1 | -3.9 |
| Spot 122 | 82  | 104639.6 | 6.0 | 3.7 | 0.6 | 24.9 | 1.1 | 0.7 | 1.0 | 0.85355 | 3361.2 | 25.3 | 3303.9 | 11.0 | 3269.3 | 9.3  | -2.8 |
| Spot 123 | 100 | 103716.3 | 2.0 | 8.5 | 0.6 | 5.4  | 1.2 | 0.3 | 1.1 | 0.87212 | 1884.1 | 17.6 | 1888.6 | 10.6 | 1893.7 | 10.9 | 0.5  |
| Spot 124 | 82  | 7206.1   | 1.5 | 7.4 | 1.3 | 6.5  | 1.5 | 0.4 | 0.7 | 0.48256 | 1958.5 | 11.9 | 2043.7 | 12.9 | 2130.9 | 22.4 | 8.1  |
| Spot 125 | 105 | 68957.0  | 2.5 | 7.3 | 0.7 | 7.5  | 1.3 | 0.4 | 1.2 | 0.85935 | 2174.8 | 21.3 | 2176.6 | 12.0 | 2178.3 | 11.9 | 0.2  |
| Spot 126 | 62  | 50764.1  | 1.9 | 7.2 | 0.7 | 7.7  | 1.0 | 0.4 | 0.7 | 0.70734 | 2195.8 | 13.3 | 2192.2 | 9.1  | 2188.7 | 12.4 | -0.3 |
| Spot 127 | 159 | 25540.5  | 2.3 | 7.3 | 0.6 | 6.9  | 1.0 | 0.4 | 0.8 | 0.81036 | 2047.5 | 14.4 | 2105.0 | 9.0  | 2161.7 | 10.3 | 5.3  |
| Spot 128 | 82  | 105979.4 | 2.2 | 7.4 | 0.6 | 7.3  | 1.1 | 0.4 | 0.9 | 0.83216 | 2163.2 | 16.2 | 2146.8 | 9.5  | 2131.2 | 10.3 | -1.5 |
| Spot 130 | 90  | 53027.7  | 3.3 | 7.6 | 0.6 | 7.1  | 0.9 | 0.4 | 0.7 | 0.74660 | 2135.1 | 12.1 | 2119.3 | 7.9  | 2104.1 | 10.4 | -1.5 |
| Spot 131 | 66  | 96514.4  | 2.6 | 5.4 | 0.7 | 13.3 | 1.1 | 0.5 | 0.9 | 0.79596 | 2723.2 | 19.7 | 2697.9 | 10.5 | 2679.1 | 11.1 | -1.6 |
| Spot 132 | 27  | 61704.2  | 3.0 | 6.9 | 0.7 | 8.3  | 1.5 | 0.4 | 1.3 | 0.87831 | 2281.0 | 25.5 | 2265.0 | 13.7 | 2250.5 | 12.5 | -1.4 |
| Spot 133 | 72  | 85905.4  | 0.5 | 5.4 | 0.6 | 13.0 | 1.2 | 0.5 | 1.0 | 0.86040 | 2663.0 | 21.7 | 2677.9 | 10.9 | 2689.2 | 9.7  | 1.0  |
| Spot 134 | 32  | 12042.8  | 3.3 | 6.7 | 0.8 | 8.3  | 1.1 | 0.4 | 0.8 | 0.68769 | 2233.6 | 14.5 | 2266.8 | 10.1 | 2296.9 | 13.9 | 2.8  |
| Spot 135 | 50  | 409674.6 | 2.2 | 5.4 | 0.6 | 13.7 | 1.1 | 0.5 | 0.9 | 0.81731 | 2804.4 | 20.2 | 2732.5 | 10.3 | 2679.8 | 10.4 | -4.6 |
| Spot 136 | 103 | 105419.1 | 1.1 | 8.5 | 0.4 | 5.3  | 0.9 | 0.3 | 0.8 | 0.88124 | 1857.8 | 12.4 | 1872.6 | 7.4  | 1889.1 | 7.4  | 1.7  |
| Spot 137 | 52  | 63575.7  | 4.3 | 7.4 | 0.6 | 7.4  | 1.4 | 0.4 | 1.2 | 0.89849 | 2177.6 | 22.8 | 2156.4 | 12.3 | 2136.2 | 10.5 | -1.9 |
| Spot 138 | 40  | 290285.6 | 2.2 | 7.9 | 0.6 | 6.5  | 1.2 | 0.4 | 1.0 | 0.84179 | 2072.5 | 17.7 | 2051.8 | 10.5 | 2031.1 | 11.3 | -2.0 |
| Spot 140 | 35  | 218637.2 | 2.5 | 6.9 | 0.5 | 8.5  | 1.1 | 0.4 | 0.9 | 0.86338 | 2302.8 | 17.9 | 2288.7 | 9.7  | 2276.1 | 9.3  | -1.2 |
| Spot 142 | 112 | 386328.5 | 2.6 | 5.4 | 0.5 | 13.1 | 1.0 | 0.5 | 0.9 | 0.86365 | 2712.8 | 20.0 | 2688.0 | 9.9  | 2669.4 | 8.7  | -1.6 |
| Spot 143 | 99  | 100195.8 | 3.0 | 5.5 | 0.5 | 12.9 | 1.0 | 0.5 | 0.9 | 0.87228 | 2697.1 | 20.1 | 2671.0 | 9.9  | 2651.4 | 8.5  | -1.7 |
| Spot 144 | 130 | 465660.7 | 2.5 | 4.9 | 0.5 | 15.4 | 1.2 | 0.6 | 1.0 | 0.88347 | 2838.3 | 23.6 | 2838.9 | 11.1 | 2839.3 | 8.9  | 0.0  |
| Spot 145 | 104 | 91858.9  | 1.6 | 8.7 | 0.8 | 5.4  | 1.3 | 0.3 | 1.0 | 0.79044 | 1914.5 | 17.0 | 1888.0 | 11.1 | 1859.0 | 14.3 | -3.0 |
| Spot 146 | 92  | 47065.3  | 3.3 | 5.4 | 0.6 | 13.3 | 1.1 | 0.5 | 0.9 | 0.81576 | 2717.1 | 19.8 | 2698.8 | 10.3 | 2685.1 | 10.4 | -1.2 |
| Spot 147 | 92  | 23692.6  | 1.7 | 8.1 | 1.0 | 5.7  | 1.5 | 0.3 | 1.1 | 0.75484 | 1887.0 | 18.0 | 1926.7 | 12.6 | 1969.6 | 17.1 | 4.2  |
| Spot 148 | 109 | 148299.1 | 2.2 | 8.4 | 0.7 | 5.6  | 1.1 | 0.3 | 0.9 | 0.78613 | 1932.5 | 14.9 | 1922.8 | 9.8  | 1912.2 | 12.6 | -1.1 |
| Spot 149 | 149 | 85482.0  | 2.5 | 8.4 | 0.7 | 5.6  | 1.2 | 0.3 | 1.0 | 0.82686 | 1910.6 | 16.7 | 1914.0 | 10.5 | 1917.8 | 12.4 | 0.4  |
| Spot 150 | 64  | 212578.0 | 2.0 | 4.6 | 0.7 | 17.3 | 1.3 | 0.6 | 1.1 | 0.84805 | 2986.8 | 25.7 | 2951.6 | 12.2 | 2927.8 | 10.9 | -2.0 |
| Spot 151 | 123 | 12377.0  | 2.0 | 7.8 | 0.7 | 6.2  | 1.0 | 0.4 | 0.8 | 0.75776 | 1991.4 | 13.4 | 2010.8 | 9.0  | 2030.7 | 11.9 | 1.9  |
| Spot 152 | 74  | 112663.9 | 1.5 | 7.4 | 0.4 | 7.5  | 0.7 | 0.4 | 0.6 | 0.82522 | 2191.4 | 10.9 | 2169.0 | 6.4  | 2147.8 | 7.0  | -2.0 |
| Spot 153 | 72  | 56550.8  | 2.4 | 5.4 | 0.5 | 12.7 | 0.9 | 0.5 | 0.7 | 0.81925 | 2639.4 | 15.2 | 2654.5 | 8.1  | 2666.0 | 8.1  | 1.0  |
| Spot 154 | 81  | 167698.9 | 2.6 | 5.4 | 0.6 | 13.0 | 1.1 | 0.5 | 1.0 | 0.85703 | 2677.9 | 20.9 | 2676.6 | 10.5 | 2675.5 | 9.5  | -0.1 |
| Spot 155 | 163 | 10827.8  | 1.5 | 7.6 | 1.3 | 5.8  | 1.8 | 0.3 | 1.2 | 0.67726 | 1826.3 | 19.0 | 1950.3 | 15.2 | 2084.7 | 22.8 | 12.4 |
| Spot 156 | 14  | 21666.9  | 3.2 | 7.0 | 0.9 | 7.5  | 1.4 | 0.4 | 1.0 | 0.74558 | 2112.5 | 18.3 | 2168.2 | 12.2 | 2221.3 | 15.7 | 4.9  |
| Spot 157 | 58  | 27775.2  | 1.9 | 7.4 | 0.6 | 7.3  | 1.0 | 0.4 | 0.8 | 0.81289 | 2180.4 | 15.1 | 2153.9 | 9.0  | 2128.7 | 10.2 | -2.4 |
| Spot 158 | 105 | 77233.9  | 2.1 | 7.6 | 0.6 | 6.9  | 1.0 | 0.4 | 0.9 | 0.84203 | 2115.7 | 15.7 | 2104.2 | 9.2  | 2092.9 | 9.8  | -1.1 |
| Spot 159 | 23  | 426049.0 | 1.7 | 7.5 | 0.8 | 7.0  | 1.3 | 0.4 | 1.1 | 0.79313 | 2112.6 | 19.3 | 2112.6 | 12.0 | 2112.6 | 14.4 | 0.0  |
| Spot 160 | 232 | 380405.8 | 1.5 | 7.7 | 0.6 | 6.5  | 1.1 | 0.4 | 0.9 | 0.85521 | 2038.2 | 16.3 | 2048.1 | 9.6  | 2058.1 | 10.0 | 1.0  |
| Spot 161 | 95  | 705445.8 | 1.8 | 8.6 | 0.6 | 5.6  | 1.2 | 0.4 | 1.0 | 0.85763 | 1942.6 | 16.7 | 1910.6 | 10.0 | 1876.1 | 10.8 | -3.5 |
| Spot 162 | 64  | 108704.7 | 2.5 | 5.5 | 0.7 | 12.8 | 1.1 | 0.5 | 0.9 | 0.82206 | 2675.9 | 20.7 | 2664.7 | 10.8 | 2656.2 | 10.9 | -0.7 |

|          |     |           |     |     |     |      |     |     |     |         |        |      |        |      |        |      |      |
|----------|-----|-----------|-----|-----|-----|------|-----|-----|-----|---------|--------|------|--------|------|--------|------|------|
| Spot 163 | 64  | 286959.7  | 2.5 | 5.1 | 0.5 | 14.5 | 1.0 | 0.5 | 0.9 | 0.88057 | 2815.3 | 19.8 | 2783.4 | 9.4  | 2760.4 | 7.7  | -2.0 |
| Spot 164 | 78  | 24425.5   | 1.4 | 8.1 | 0.7 | 6.0  | 1.0 | 0.4 | 0.7 | 0.74417 | 1987.4 | 12.8 | 1978.0 | 8.7  | 1968.2 | 11.9 | -1.0 |
| Spot 165 | 166 | 184712.4  | 1.8 | 5.1 | 0.3 | 14.0 | 0.7 | 0.5 | 0.6 | 0.89695 | 2729.6 | 13.9 | 2747.2 | 6.6  | 2760.2 | 5.1  | 1.1  |
| Spot 167 | 119 | 589398.6  | 2.3 | 4.7 | 0.6 | 17.0 | 1.2 | 0.6 | 1.0 | 0.84968 | 2964.3 | 23.4 | 2935.4 | 11.1 | 2915.6 | 9.9  | -1.7 |
| Spot 168 | 169 | 64781.9   | 1.9 | 5.4 | 0.5 | 12.7 | 0.9 | 0.5 | 0.7 | 0.84327 | 2631.1 | 16.0 | 2654.6 | 8.3  | 2672.5 | 7.8  | 1.5  |
| Spot 169 | 144 | 846126.2  | 2.1 | 5.4 | 0.5 | 12.9 | 1.1 | 0.5 | 1.0 | 0.90320 | 2664.1 | 22.2 | 2670.4 | 10.6 | 2675.2 | 8.0  | 0.4  |
| Spot 170 | 153 | 117533.9  | 3.4 | 5.3 | 0.5 | 13.3 | 1.1 | 0.5 | 1.0 | 0.89430 | 2718.3 | 21.7 | 2703.3 | 10.3 | 2692.1 | 8.1  | -1.0 |
| Spot 172 | 73  | 110122.9  | 2.9 | 5.5 | 0.5 | 13.0 | 1.0 | 0.5 | 0.9 | 0.88737 | 2714.0 | 20.1 | 2681.4 | 9.6  | 2656.9 | 7.8  | -2.1 |
| Spot 173 | 49  | 297448.4  | 2.5 | 7.5 | 0.5 | 7.1  | 1.0 | 0.4 | 0.9 | 0.84956 | 2131.8 | 15.7 | 2119.3 | 9.0  | 2107.2 | 9.4  | -1.2 |
| Spot 174 | 123 | 1505628.3 | 2.8 | 5.4 | 0.5 | 13.2 | 1.1 | 0.5 | 1.0 | 0.90651 | 2697.5 | 21.3 | 2693.7 | 10.1 | 2690.8 | 7.4  | -0.2 |
| Spot 175 | 81  | 13816.8   | 2.2 | 7.1 | 1.2 | 7.5  | 1.5 | 0.4 | 0.9 | 0.60479 | 2146.0 | 16.2 | 2168.6 | 13.1 | 2190.0 | 20.3 | 2.0  |
| Spot 176 | 98  | 208804.6  | 2.2 | 8.4 | 0.6 | 5.6  | 1.1 | 0.3 | 0.9 | 0.84808 | 1927.2 | 15.7 | 1920.6 | 9.6  | 1913.5 | 10.5 | -0.7 |
| Spot 177 | 69  | 1101471.5 | 2.9 | 5.4 | 0.7 | 13.2 | 1.2 | 0.5 | 1.0 | 0.84475 | 2719.8 | 22.8 | 2692.3 | 11.5 | 2671.7 | 10.8 | -1.8 |
| Spot 178 | 80  | 1258721.8 | 1.4 | 8.5 | 0.7 | 5.4  | 1.2 | 0.3 | 0.9 | 0.80250 | 1865.5 | 15.1 | 1879.6 | 9.9  | 1895.2 | 12.5 | 1.6  |
| Spot 179 | 70  | 450329.1  | 1.7 | 5.4 | 0.5 | 13.4 | 0.9 | 0.5 | 0.7 | 0.77742 | 2746.5 | 14.8 | 2707.5 | 8.1  | 2678.5 | 8.9  | -2.5 |
| Spot 180 | 91  | 191666.7  | 3.5 | 7.2 | 0.6 | 7.8  | 1.2 | 0.4 | 1.1 | 0.85839 | 2226.1 | 20.2 | 2203.3 | 11.2 | 2182.2 | 11.1 | -2.0 |
| Spot 181 | 65  | 11383.4   | 1.5 | 7.6 | 1.3 | 6.2  | 1.4 | 0.3 | 0.6 | 0.41586 | 1924.4 | 9.7  | 2005.3 | 12.3 | 2089.7 | 22.5 | 7.9  |
| Spot 182 | 92  | 90207.0   | 3.2 | 7.5 | 0.7 | 6.2  | 1.3 | 0.3 | 1.1 | 0.85090 | 1906.5 | 17.6 | 2007.9 | 11.0 | 2113.7 | 11.6 | 9.8  |
| Spot 183 | 65  | 103954.4  | 2.2 | 5.4 | 0.6 | 13.2 | 1.1 | 0.5 | 0.9 | 0.82632 | 2718.5 | 20.7 | 2697.3 | 10.7 | 2681.4 | 10.5 | -1.4 |
| Spot 184 | 130 | 15743.2   | 1.3 | 6.6 | 0.7 | 8.1  | 1.3 | 0.4 | 1.0 | 0.81355 | 2146.1 | 18.8 | 2244.6 | 11.5 | 2335.7 | 12.6 | 8.1  |
| Spot 185 | 83  | 5436801.1 | 2.9 | 5.5 | 0.6 | 13.1 | 1.1 | 0.5 | 0.9 | 0.84761 | 2720.0 | 19.8 | 2685.1 | 9.9  | 2659.0 | 9.2  | -2.3 |
| Spot 186 | 67  | 100763.8  | 3.3 | 7.2 | 0.5 | 7.7  | 1.0 | 0.4 | 0.9 | 0.86880 | 2216.1 | 16.8 | 2201.5 | 9.3  | 2187.9 | 8.9  | -1.3 |
| Spot 187 | 128 | 198008.5  | 4.0 | 7.8 | 0.5 | 6.8  | 1.1 | 0.4 | 0.9 | 0.88258 | 2114.3 | 16.9 | 2085.5 | 9.4  | 2057.2 | 8.8  | -2.8 |
| Spot 188 | 107 | 68455.5   | 1.7 | 8.0 | 0.6 | 6.1  | 1.0 | 0.4 | 0.8 | 0.78979 | 1972.2 | 13.5 | 1986.5 | 8.8  | 2001.4 | 10.9 | 1.5  |
| Spot 189 | 102 | 72973.1   | 2.0 | 5.4 | 0.5 | 13.0 | 0.8 | 0.5 | 0.7 | 0.78112 | 2688.0 | 14.5 | 2678.0 | 8.0  | 2670.6 | 8.8  | -0.7 |
| Spot 190 | 70  | 24996.7   | 3.4 | 7.3 | 0.4 | 7.4  | 0.8 | 0.4 | 0.6 | 0.83754 | 2152.1 | 11.7 | 2162.3 | 6.8  | 2171.9 | 7.3  | 0.9  |
| Spot 191 | 111 | 100007.8  | 2.9 | 7.3 | 0.7 | 7.5  | 1.1 | 0.4 | 0.9 | 0.82088 | 2167.7 | 17.3 | 2168.0 | 10.3 | 2168.2 | 11.4 | 0.0  |
| Spot 192 | 51  | 86224.1   | 1.6 | 7.6 | 0.6 | 7.1  | 1.0 | 0.4 | 0.8 | 0.78002 | 2147.2 | 13.8 | 2125.7 | 8.6  | 2104.9 | 10.6 | -2.0 |
| Spot 193 | 92  | 228733.5  | 2.5 | 5.4 | 0.5 | 13.1 | 0.9 | 0.5 | 0.8 | 0.86977 | 2715.5 | 17.8 | 2687.1 | 8.7  | 2665.8 | 7.5  | -1.9 |
| Spot 194 | 117 | 120784.0  | 2.9 | 5.5 | 0.5 | 13.0 | 1.0 | 0.5 | 0.9 | 0.86699 | 2715.7 | 19.7 | 2682.9 | 9.7  | 2658.2 | 8.5  | -2.2 |
| Spot 196 | 89  | 19671.2   | 2.5 | 7.1 | 0.4 | 7.4  | 0.9 | 0.4 | 0.8 | 0.88280 | 2129.5 | 14.7 | 2163.8 | 8.2  | 2196.4 | 7.5  | 3.0  |
| Spot 197 | 105 | 27792.5   | 3.2 | 6.9 | 0.6 | 7.9  | 0.9 | 0.4 | 0.7 | 0.75698 | 2177.6 | 13.2 | 2220.8 | 8.5  | 2260.9 | 10.7 | 3.7  |
| Spot 198 | 93  | 10995.4   | 1.4 | 5.1 | 0.6 | 14.8 | 1.0 | 0.6 | 0.8 | 0.82097 | 2845.7 | 18.5 | 2802.7 | 9.3  | 2772.0 | 9.2  | -2.7 |
| Spot 199 | 96  | 17369.2   | 1.5 | 7.2 | 0.7 | 7.0  | 1.1 | 0.4 | 0.8 | 0.78387 | 2046.2 | 14.4 | 2116.8 | 9.3  | 2186.1 | 11.4 | 6.4  |
| Spot 200 | 189 | 233652.5  | 2.7 | 7.5 | 0.6 | 7.0  | 1.0 | 0.4 | 0.8 | 0.78393 | 2113.2 | 14.3 | 2115.6 | 9.0  | 2118.0 | 11.0 | 0.2  |
| Spot 201 | 129 | 9049.6    | 2.0 | 6.9 | 4.6 | 6.6  | 4.8 | 0.3 | 1.5 | 0.31470 | 1888.3 | 24.9 | 2064.4 | 42.7 | 2245.1 | 79.3 | 15.9 |
| Spot 202 | 96  | 10473.7   | 1.5 | 7.6 | 0.7 | 6.2  | 1.0 | 0.4 | 0.8 | 0.78217 | 1940.3 | 13.7 | 2008.5 | 9.2  | 2079.3 | 11.5 | 6.7  |
| Spot 203 | 38  | 24699.6   | 1.2 | 7.6 | 0.7 | 6.7  | 1.4 | 0.4 | 1.2 | 0.86669 | 2059.4 | 21.2 | 2068.7 | 12.3 | 2078.1 | 12.2 | 0.9  |
| Spot 204 | 132 | 84599.2   | 1.8 | 7.1 | 0.5 | 7.9  | 0.8 | 0.4 | 0.6 | 0.77706 | 2225.3 | 11.9 | 2223.9 | 7.4  | 2222.5 | 8.9  | -0.1 |
| Spot 205 | 76  | 28712.2   | 1.7 | 8.0 | 0.8 | 6.0  | 1.2 | 0.4 | 0.9 | 0.74946 | 1957.2 | 15.5 | 1977.5 | 10.7 | 1998.8 | 14.4 | 2.1  |
| Spot 206 | 43  | 100719.2  | 3.7 | 5.2 | 0.6 | 13.6 | 1.1 | 0.5 | 0.9 | 0.83527 | 2700.1 | 20.0 | 2721.0 | 10.2 | 2736.6 | 9.8  | 1.3  |
| Spot 207 | 153 | 46403.1   | 6.5 | 7.5 | 0.5 | 6.8  | 1.1 | 0.4 | 0.9 | 0.88780 | 2075.9 | 16.7 | 2090.9 | 9.4  | 2105.7 | 8.5  | 1.4  |
| Spot 209 | 65  | 110181.8  | 1.6 | 7.4 | 0.6 | 7.2  | 1.1 | 0.4 | 0.9 | 0.81025 | 2118.4 | 15.6 | 2133.5 | 9.5  | 2148.1 | 10.9 | 1.4  |

|          |     |           |     |     |     |      |     |     |     |         |        |      |        |      |        |      |      |
|----------|-----|-----------|-----|-----|-----|------|-----|-----|-----|---------|--------|------|--------|------|--------|------|------|
| Spot 210 | 48  | 99789.6   | 2.5 | 8.6 | 0.6 | 5.5  | 1.0 | 0.3 | 0.7 | 0.74662 | 1906.3 | 12.0 | 1893.8 | 8.3  | 1880.1 | 11.7 | -1.4 |
| Spot 211 | 132 | 32454.1   | 1.5 | 8.3 | 0.8 | 5.5  | 1.3 | 0.3 | 1.1 | 0.79940 | 1865.2 | 17.2 | 1897.1 | 11.4 | 1932.2 | 14.3 | 3.5  |
| Spot 212 | 118 | 101189.8  | 2.4 | 5.5 | 0.5 | 12.9 | 1.1 | 0.5 | 1.0 | 0.87939 | 2693.0 | 21.4 | 2672.3 | 10.4 | 2656.7 | 8.7  | -1.4 |
| Spot 213 | 133 | 416265.2  | 1.5 | 7.2 | 0.6 | 7.9  | 1.0 | 0.4 | 0.9 | 0.84818 | 2255.0 | 16.8 | 2216.0 | 9.4  | 2180.0 | 9.6  | -3.4 |
| Spot 214 | 86  | 86698.5   | 1.4 | 7.9 | 0.6 | 6.6  | 1.0 | 0.4 | 0.9 | 0.81713 | 2091.5 | 15.2 | 2054.9 | 9.2  | 2018.5 | 10.7 | -3.6 |
| Spot 215 | 42  | 97859.0   | 4.2 | 7.5 | 0.6 | 7.4  | 1.0 | 0.4 | 0.8 | 0.81236 | 2210.2 | 15.8 | 2164.0 | 9.3  | 2120.4 | 10.6 | -4.2 |
| Spot 216 | 84  | 104188.2  | 2.2 | 7.7 | 0.6 | 6.9  | 1.0 | 0.4 | 0.8 | 0.82180 | 2118.3 | 15.2 | 2095.0 | 9.1  | 2072.2 | 10.3 | -2.2 |
| Spot 217 | 80  | 1442695.4 | 2.0 | 7.9 | 0.6 | 6.5  | 1.1 | 0.4 | 0.9 | 0.83303 | 2069.4 | 16.4 | 2051.9 | 9.8  | 2034.3 | 10.9 | -1.7 |
| Spot 218 | 81  | 108126.7  | 1.6 | 8.5 | 0.7 | 5.5  | 1.2 | 0.3 | 1.0 | 0.81988 | 1905.6 | 16.4 | 1901.4 | 10.4 | 1896.7 | 12.5 | -0.5 |
| Spot 219 | 122 | 64852.4   | 2.0 | 5.4 | 0.6 | 12.8 | 1.1 | 0.5 | 0.9 | 0.84140 | 2658.2 | 19.7 | 2663.1 | 10.1 | 2666.8 | 9.6  | 0.3  |
| Spot 220 | 87  | 27355.3   | 2.5 | 5.3 | 0.7 | 13.3 | 1.1 | 0.5 | 0.9 | 0.77066 | 2681.9 | 19.2 | 2698.1 | 10.7 | 2710.2 | 11.9 | 1.0  |
| Spot 221 | 129 | 29508.1   | 2.4 | 7.9 | 0.7 | 6.1  | 1.3 | 0.4 | 1.0 | 0.81539 | 1964.1 | 17.6 | 1990.0 | 11.1 | 2017.0 | 13.1 | 2.6  |
| Spot 222 | 63  | 3953047.6 | 2.0 | 5.3 | 0.5 | 13.8 | 1.1 | 0.5 | 1.0 | 0.89693 | 2760.1 | 22.2 | 2735.9 | 10.5 | 2718.1 | 8.1  | -1.5 |
| Spot 223 | 80  | 22988.9   | 1.7 | 6.9 | 0.6 | 8.0  | 1.0 | 0.4 | 0.8 | 0.80562 | 2194.9 | 15.1 | 2233.0 | 9.1  | 2268.0 | 10.3 | 3.2  |
| Spot 224 | 141 | 126050.8  | 2.3 | 5.5 | 0.5 | 12.7 | 1.1 | 0.5 | 1.0 | 0.87844 | 2660.8 | 21.0 | 2657.5 | 10.3 | 2655.0 | 8.7  | -0.2 |
| Spot 225 | 115 | 300828.8  | 2.1 | 7.2 | 0.7 | 7.6  | 1.3 | 0.4 | 1.1 | 0.82705 | 2184.7 | 20.1 | 2185.5 | 11.8 | 2186.2 | 12.8 | 0.1  |
| Spot 226 | 85  | 301128.3  | 2.0 | 5.3 | 0.5 | 13.6 | 1.0 | 0.5 | 0.9 | 0.88045 | 2740.9 | 20.0 | 2725.0 | 9.6  | 2713.2 | 7.9  | -1.0 |
| Spot 227 | 22  | 67724.8   | 1.2 | 5.4 | 0.5 | 12.5 | 1.0 | 0.5 | 0.9 | 0.84781 | 2591.4 | 18.6 | 2644.4 | 9.7  | 2685.3 | 9.0  | 3.5  |
| Spot 228 | 103 | 23422.8   | 1.4 | 3.0 | 0.5 | 32.3 | 1.0 | 0.7 | 0.8 | 0.84034 | 3505.9 | 22.2 | 3559.3 | 9.6  | 3589.5 | 8.1  | 2.3  |
| Spot 229 | 123 | 92245.3   | 1.6 | 7.2 | 0.6 | 7.5  | 1.3 | 0.4 | 1.1 | 0.88867 | 2169.0 | 21.1 | 2178.5 | 11.6 | 2187.3 | 10.3 | 0.8  |
| Spot 230 | 52  | 98528.4   | 1.6 | 7.6 | 0.7 | 7.0  | 1.2 | 0.4 | 1.0 | 0.81212 | 2150.7 | 18.0 | 2117.4 | 10.8 | 2085.2 | 12.5 | -3.1 |
| Spot 231 | 127 | 277841.2  | 2.5 | 5.6 | 0.7 | 12.2 | 1.1 | 0.5 | 0.8 | 0.77253 | 2612.8 | 17.8 | 2619.4 | 10.1 | 2624.5 | 11.4 | 0.4  |
| Spot 232 | 120 | 11629.1   | 2.0 | 7.6 | 0.9 | 6.2  | 1.2 | 0.3 | 0.8 | 0.64266 | 1927.6 | 13.3 | 2001.3 | 10.8 | 2078.3 | 16.7 | 7.3  |
| Spot 233 | 138 | 7769539.0 | 3.3 | 8.5 | 0.7 | 5.5  | 1.1 | 0.3 | 0.8 | 0.77562 | 1909.2 | 13.5 | 1906.4 | 9.1  | 1903.3 | 11.9 | -0.3 |
| Spot 234 | 77  | 6770.2    | 2.1 | 6.6 | 0.6 | 7.9  | 1.0 | 0.4 | 0.7 | 0.76549 | 2106.8 | 13.4 | 2214.2 | 8.8  | 2315.1 | 10.7 | 9.0  |
| Spot 235 | 45  | 28413.5   | 1.2 | 5.1 | 0.7 | 14.3 | 1.1 | 0.5 | 0.8 | 0.76654 | 2777.6 | 19.1 | 2771.8 | 10.5 | 2767.6 | 11.6 | -0.4 |
| Spot 236 | 23  | 19367.6   | 0.8 | 7.8 | 0.7 | 6.5  | 1.2 | 0.4 | 1.0 | 0.83072 | 2045.8 | 17.3 | 2039.2 | 10.5 | 2032.6 | 11.7 | -0.6 |
| Spot 237 | 20  | 31229.9   | 3.1 | 7.6 | 0.7 | 7.1  | 1.1 | 0.4 | 0.8 | 0.77095 | 2141.7 | 15.3 | 2121.0 | 9.7  | 2101.0 | 12.1 | -1.9 |
| Spot 238 | 132 | 175408.5  | 2.4 | 5.4 | 0.6 | 12.8 | 1.1 | 0.5 | 1.0 | 0.86273 | 2632.8 | 20.6 | 2661.4 | 10.4 | 2683.2 | 9.2  | 1.9  |
| Spot 239 | 31  | 203112.1  | 2.8 | 7.5 | 0.7 | 7.1  | 1.2 | 0.4 | 1.0 | 0.82682 | 2111.0 | 18.3 | 2118.3 | 10.9 | 2125.3 | 12.1 | 0.7  |
| Spot 240 | 116 | 49033.5   | 1.6 | 7.4 | 0.5 | 7.1  | 1.0 | 0.4 | 0.9 | 0.84771 | 2111.1 | 15.4 | 2128.8 | 9.0  | 2146.0 | 9.4  | 1.6  |
| Spot 241 | 85  | 265102.5  | 2.8 | 5.4 | 0.7 | 13.1 | 1.2 | 0.5 | 1.0 | 0.83082 | 2685.4 | 21.8 | 2684.1 | 11.3 | 2683.2 | 11.0 | -0.1 |
| Spot 242 | 77  | 309666.1  | 2.5 | 5.4 | 0.6 | 12.8 | 1.0 | 0.5 | 0.8 | 0.79165 | 2665.2 | 16.4 | 2666.2 | 9.0  | 2666.9 | 9.6  | 0.1  |
| Spot 243 | 76  | 12985.7   | 2.1 | 7.7 | 1.5 | 6.0  | 1.7 | 0.3 | 0.7 | 0.41136 | 1900.8 | 11.4 | 1982.9 | 14.6 | 2069.7 | 27.0 | 8.2  |
| Spot 244 | 41  | 57552.0   | 2.1 | 7.5 | 0.7 | 7.1  | 1.3 | 0.4 | 1.0 | 0.82430 | 2139.6 | 19.0 | 2125.6 | 11.3 | 2112.0 | 12.6 | -1.3 |
| Spot 245 | 205 | 108584.0  | 4.6 | 7.4 | 0.7 | 6.9  | 1.3 | 0.4 | 1.2 | 0.87458 | 2051.2 | 20.7 | 2092.7 | 11.9 | 2133.8 | 11.4 | 3.9  |
| Spot 246 | 87  | 3338674.2 | 2.3 | 8.6 | 0.7 | 5.5  | 1.0 | 0.3 | 0.8 | 0.75285 | 1904.2 | 12.6 | 1896.8 | 8.7  | 1888.8 | 12.1 | -0.8 |
| Spot 247 | 170 | 89469.8   | 1.9 | 7.2 | 0.6 | 7.5  | 1.3 | 0.4 | 1.1 | 0.88353 | 2159.5 | 21.0 | 2176.6 | 11.6 | 2192.7 | 10.6 | 1.5  |
| Spot 248 | 178 | 8933.3    | 6.0 | 5.0 | 0.6 | 13.1 | 1.3 | 0.5 | 1.2 | 0.87900 | 2545.8 | 24.5 | 2684.7 | 12.5 | 2791.1 | 10.3 | 8.8  |
| Spot 250 | 88  | 242147.0  | 1.3 | 5.4 | 0.5 | 12.9 | 1.0 | 0.5 | 0.9 | 0.88653 | 2669.7 | 19.2 | 2675.3 | 9.4  | 2679.5 | 7.6  | 0.4  |
| Spot 251 | 104 | 397717.0  | 2.2 | 7.6 | 0.6 | 7.0  | 1.1 | 0.4 | 1.0 | 0.85684 | 2137.4 | 17.4 | 2114.4 | 9.9  | 2092.1 | 10.1 | -2.2 |
| Spot 252 | 143 | 28132.2   | 2.7 | 7.9 | 0.9 | 5.8  | 1.6 | 0.3 | 1.3 | 0.81289 | 1890.2 | 20.9 | 1951.8 | 13.6 | 2017.8 | 16.2 | 6.3  |
| Spot 253 | 111 | 1276265.7 | 1.5 | 8.5 | 0.7 | 5.4  | 1.2 | 0.3 | 1.0 | 0.79623 | 1885.2 | 15.6 | 1891.9 | 10.3 | 1899.2 | 13.1 | 0.7  |

|          |     |           |     |     |     |      |     |     |     |         |        |      |        |      |        |      |      |
|----------|-----|-----------|-----|-----|-----|------|-----|-----|-----|---------|--------|------|--------|------|--------|------|------|
| Spot 254 | 72  | 128568.3  | 1.8 | 8.5 | 0.6 | 5.6  | 1.1 | 0.4 | 0.9 | 0.81058 | 1938.3 | 14.4 | 1917.3 | 9.2  | 1894.7 | 11.2 | -2.3 |
| Spot 255 | 78  | 19871.6   | 2.5 | 4.9 | 0.5 | 14.4 | 0.8 | 0.5 | 0.7 | 0.83128 | 2687.8 | 14.8 | 2776.6 | 7.7  | 2841.8 | 7.3  | 5.4  |
| Spot 256 | 220 | 125923.1  | 6.1 | 5.0 | 0.6 | 15.1 | 1.2 | 0.5 | 1.0 | 0.85886 | 2819.3 | 22.9 | 2821.7 | 11.1 | 2823.4 | 9.8  | 0.1  |
| Spot 257 | 159 | 33458.6   | 1.9 | 7.5 | 0.7 | 6.8  | 1.2 | 0.4 | 1.0 | 0.83191 | 2056.6 | 17.5 | 2086.7 | 10.6 | 2116.4 | 11.6 | 2.8  |
| Spot 258 | 114 | 36233.9   | 2.0 | 7.1 | 0.7 | 7.9  | 1.0 | 0.4 | 0.7 | 0.73006 | 2230.4 | 14.1 | 2222.6 | 9.2  | 2215.5 | 12.1 | -0.7 |
| Spot 259 | 86  | 17616.8   | 2.5 | 8.1 | 0.6 | 5.6  | 1.1 | 0.3 | 0.8 | 0.79335 | 1870.4 | 13.5 | 1920.9 | 9.1  | 1976.0 | 11.4 | 5.3  |
| Spot 260 | 125 | 48784.0   | 1.7 | 8.3 | 0.8 | 5.5  | 1.6 | 0.3 | 1.3 | 0.83987 | 1863.0 | 21.2 | 1898.5 | 13.4 | 1937.5 | 15.2 | 3.8  |
| Spot 261 | 69  | 1784031.5 | 2.3 | 7.7 | 0.6 | 6.9  | 1.0 | 0.4 | 0.8 | 0.78499 | 2115.2 | 14.0 | 2101.9 | 8.8  | 2088.9 | 10.8 | -1.3 |
| Spot 262 | 108 | 50165.8   | 2.6 | 8.3 | 0.5 | 5.7  | 0.8 | 0.3 | 0.7 | 0.82712 | 1931.5 | 11.7 | 1934.2 | 7.3  | 1937.1 | 8.5  | 0.3  |
| Spot 263 | 118 | 8247.9    | 1.5 | 7.4 | 0.8 | 6.1  | 1.0 | 0.3 | 0.6 | 0.61838 | 1851.5 | 10.3 | 1987.6 | 9.1  | 2132.3 | 14.3 | 13.2 |
| Spot 264 | 82  | 659171.6  | 2.6 | 5.5 | 0.7 | 12.6 | 1.1 | 0.5 | 0.8 | 0.75800 | 2666.0 | 17.6 | 2650.3 | 10.0 | 2638.4 | 11.5 | -1.0 |
| Spot 265 | 86  | 4852.8    | 4.9 | 6.1 | 1.3 | 8.7  | 1.6 | 0.4 | 0.9 | 0.55480 | 2143.3 | 16.4 | 2304.9 | 14.7 | 2451.4 | 22.8 | 12.6 |
| Spot 266 | 99  | 152475.2  | 1.8 | 7.6 | 0.6 | 6.9  | 1.0 | 0.4 | 0.8 | 0.78597 | 2097.0 | 14.5 | 2103.1 | 9.2  | 2109.1 | 11.2 | 0.6  |
| Spot 267 | 89  | 20503.7   | 2.5 | 6.8 | 0.9 | 7.9  | 1.3 | 0.4 | 0.9 | 0.73871 | 2149.3 | 17.3 | 2217.9 | 11.6 | 2281.9 | 14.9 | 5.8  |
| Spot 268 | 61  | 234679.8  | 1.8 | 8.2 | 0.5 | 6.1  | 0.9 | 0.4 | 0.8 | 0.81510 | 1998.8 | 13.2 | 1986.0 | 8.2  | 1972.6 | 9.7  | -1.3 |
| Spot 269 | 131 | 84806.4   | 2.2 | 7.4 | 0.7 | 7.2  | 1.3 | 0.4 | 1.1 | 0.83990 | 2124.7 | 20.1 | 2133.7 | 11.8 | 2142.5 | 12.5 | 0.8  |
| Spot 270 | 51  | 127183.3  | 1.4 | 7.2 | 0.5 | 7.8  | 0.9 | 0.4 | 0.7 | 0.82912 | 2205.9 | 13.7 | 2202.9 | 8.0  | 2200.0 | 8.6  | -0.3 |
| Spot 271 | 49  | 90287.1   | 1.7 | 8.1 | 0.6 | 5.9  | 1.0 | 0.4 | 0.8 | 0.82209 | 1937.0 | 13.7 | 1960.1 | 8.6  | 1984.6 | 10.1 | 2.4  |
| Spot 272 | 114 | 15375.2   | 1.9 | 7.9 | 0.7 | 5.9  | 1.0 | 0.3 | 0.6 | 0.66260 | 1905.0 | 10.6 | 1964.8 | 8.4  | 2028.4 | 12.8 | 6.1  |
| Spot 273 | 143 | 247669.7  | 5.0 | 7.6 | 0.6 | 6.8  | 1.0 | 0.4 | 0.8 | 0.77017 | 2067.7 | 13.7 | 2080.2 | 8.9  | 2092.7 | 11.3 | 1.2  |
| Spot 274 | 44  | 28294.5   | 2.5 | 8.1 | 0.9 | 6.0  | 1.2 | 0.4 | 0.8 | 0.67343 | 1947.1 | 13.4 | 1968.7 | 10.3 | 1991.5 | 15.6 | 2.2  |
| Spot 275 | 56  | 115321.8  | 1.2 | 7.3 | 0.8 | 7.7  | 1.3 | 0.4 | 1.0 | 0.79030 | 2219.5 | 18.8 | 2195.2 | 11.4 | 2172.5 | 13.5 | -2.2 |
| Spot 276 | 110 | 21084.8   | 1.1 | 8.0 | 1.3 | 5.9  | 1.4 | 0.3 | 0.6 | 0.41767 | 1922.5 | 9.6  | 1959.3 | 12.0 | 1998.3 | 22.3 | 3.8  |
| Spot 277 | 189 | 71397.7   | 2.3 | 8.4 | 0.5 | 5.3  | 1.4 | 0.3 | 1.3 | 0.92819 | 1820.6 | 19.9 | 1867.1 | 11.5 | 1919.3 | 9.0  | 5.1  |
| Spot 278 | 37  | 95054.4   | 1.1 | 5.4 | 0.7 | 12.6 | 1.3 | 0.5 | 1.0 | 0.81494 | 2609.7 | 22.1 | 2650.2 | 11.9 | 2681.3 | 12.1 | 2.7  |
| Spot 279 | 80  | 1125120.0 | 2.4 | 5.6 | 0.6 | 12.7 | 1.2 | 0.5 | 1.0 | 0.85233 | 2678.2 | 22.3 | 2654.6 | 11.2 | 2636.7 | 10.4 | -1.6 |
| Spot 280 | 68  | 13931.3   | 1.6 | 6.9 | 0.5 | 7.7  | 1.1 | 0.4 | 1.0 | 0.88715 | 2113.9 | 18.1 | 2195.2 | 10.2 | 2272.0 | 9.0  | 7.0  |
| Spot 281 | 72  | 106039.4  | 2.0 | 7.6 | 0.6 | 6.8  | 1.2 | 0.4 | 1.0 | 0.86640 | 2085.2 | 18.4 | 2091.1 | 10.6 | 2096.9 | 10.5 | 0.6  |
| Spot 282 | 59  | 57447.9   | 1.6 | 7.3 | 0.8 | 7.2  | 1.3 | 0.4 | 1.1 | 0.82779 | 2103.0 | 20.0 | 2135.1 | 12.0 | 2166.1 | 13.1 | 2.9  |
| Spot 283 | 139 | 28534.4   | 2.2 | 6.9 | 0.9 | 7.5  | 1.1 | 0.4 | 0.7 | 0.64123 | 2077.8 | 12.7 | 2172.3 | 10.0 | 2262.8 | 14.8 | 8.2  |
| Spot 284 | 143 | 6961213.1 | 2.6 | 8.5 | 0.6 | 5.5  | 1.0 | 0.3 | 0.8 | 0.81084 | 1888.3 | 13.7 | 1894.8 | 8.8  | 1902.0 | 10.8 | 0.7  |
| Spot 285 | 70  | 71056.5   | 2.2 | 8.5 | 0.5 | 5.6  | 1.0 | 0.4 | 0.8 | 0.85152 | 1952.1 | 13.8 | 1923.2 | 8.3  | 1892.1 | 9.1  | -3.2 |
| Spot 287 | 237 | 27695.8   | 2.1 | 6.9 | 0.5 | 7.6  | 1.4 | 0.4 | 1.3 | 0.92605 | 2094.2 | 22.4 | 2182.4 | 12.1 | 2266.4 | 8.8  | 7.6  |
| Spot 288 | 80  | 93206.6   | 1.5 | 5.8 | 0.6 | 11.8 | 1.0 | 0.5 | 0.9 | 0.83133 | 2611.8 | 18.7 | 2591.7 | 9.8  | 2576.1 | 9.7  | -1.4 |
| Spot 289 | 171 | 109948.3  | 1.5 | 7.4 | 0.5 | 7.2  | 1.1 | 0.4 | 1.0 | 0.87966 | 2135.6 | 18.3 | 2137.5 | 10.2 | 2139.3 | 9.5  | 0.2  |
| Spot 290 | 33  | 43867.6   | 1.3 | 5.1 | 0.6 | 15.0 | 1.2 | 0.6 | 1.0 | 0.85900 | 2889.9 | 23.9 | 2817.9 | 11.4 | 2766.8 | 10.0 | -4.4 |
| Spot 291 | 130 | 127009.5  | 2.6 | 3.8 | 0.4 | 23.0 | 0.9 | 0.6 | 0.8 | 0.90693 | 3186.3 | 20.1 | 3227.3 | 8.6  | 3253.0 | 5.8  | 2.1  |
| Spot 292 | 125 | 269643.8  | 2.3 | 8.6 | 0.6 | 5.5  | 1.1 | 0.3 | 1.0 | 0.84636 | 1905.8 | 16.0 | 1895.9 | 9.8  | 1885.0 | 11.0 | -1.1 |
| Spot 293 | 193 | 258090.6  | 4.8 | 7.7 | 0.5 | 6.8  | 1.1 | 0.4 | 1.0 | 0.89429 | 2086.3 | 17.7 | 2082.4 | 9.8  | 2078.6 | 8.7  | -0.4 |
| Spot 294 | 76  | 31763.3   | 2.2 | 7.3 | 0.6 | 7.7  | 0.8 | 0.4 | 0.6 | 0.74596 | 2231.8 | 11.9 | 2199.3 | 7.6  | 2169.2 | 9.8  | -2.9 |
| Spot 295 | 94  | 421266.8  | 1.0 | 5.3 | 0.6 | 13.6 | 1.0 | 0.5 | 0.8 | 0.81533 | 2721.9 | 17.5 | 2722.0 | 9.2  | 2722.1 | 9.2  | 0.0  |
| Spot 296 | 86  | 104842.0  | 2.0 | 8.6 | 0.4 | 5.4  | 1.1 | 0.3 | 1.0 | 0.91239 | 1887.3 | 16.1 | 1886.0 | 9.3  | 1884.6 | 8.0  | -0.1 |
| Spot 297 | 87  | 108422.2  | 3.3 | 6.3 | 0.6 | 9.8  | 1.1 | 0.5 | 1.0 | 0.83302 | 2428.2 | 19.4 | 2420.7 | 10.6 | 2414.4 | 10.8 | -0.6 |

|                    |     |           |      |     |     |      |     |     |     |         |        |      |        |      |        |      |      |
|--------------------|-----|-----------|------|-----|-----|------|-----|-----|-----|---------|--------|------|--------|------|--------|------|------|
| Spot 29€           | 49  | 82257.5   | 1.8  | 5.5 | 0.6 | 13.1 | 1.0 | 0.5 | 0.8 | 0.82909 | 2730.0 | 18.3 | 2686.9 | 9.4  | 2654.6 | 9.2  | -2.8 |
| Spot 29€           | 26  | 6522.8    | 2.8  | 6.7 | 1.2 | 8.1  | 1.4 | 0.4 | 0.8 | 0.58106 | 2175.5 | 15.2 | 2240.5 | 12.8 | 2300.5 | 19.8 | 5.4  |
| Spot 30€           | 76  | 109250.8  | 2.0  | 8.6 | 0.6 | 5.5  | 1.1 | 0.3 | 0.9 | 0.83587 | 1923.3 | 15.8 | 1901.7 | 9.7  | 1878.1 | 11.2 | -2.4 |
| Spot 301           | 95  | 80888.4   | 2.0  | 7.4 | 0.7 | 7.2  | 1.0 | 0.4 | 0.7 | 0.73211 | 2143.4 | 13.2 | 2140.6 | 8.8  | 2137.9 | 11.8 | -0.3 |
| Spot 302           | 116 | 16334.6   | 1.6  | 7.9 | 0.7 | 5.4  | 1.1 | 0.3 | 0.8 | 0.76135 | 1775.8 | 12.5 | 1890.7 | 9.1  | 2019.4 | 12.2 | 12.1 |
| Spot 303           | 130 | 286553.3  | 2.0  | 8.6 | 0.5 | 5.4  | 0.9 | 0.3 | 0.8 | 0.84132 | 1874.8 | 12.7 | 1883.0 | 7.9  | 1892.0 | 9.0  | 0.9  |
| Spot 304           | 34  | 55128.1   | 1.5  | 5.6 | 0.8 | 12.3 | 1.3 | 0.5 | 1.0 | 0.77966 | 2645.1 | 22.4 | 2629.2 | 12.4 | 2617.0 | 13.8 | -1.1 |
| Spot 30€           | 92  | 109400.7  | 1.7  | 7.3 | 0.5 | 7.5  | 1.1 | 0.4 | 0.9 | 0.88217 | 2186.8 | 17.5 | 2173.2 | 9.6  | 2160.3 | 8.8  | -1.2 |
| Spot 30€           | 37  | 63880.4   | 1.8  | 7.5 | 0.6 | 7.2  | 1.1 | 0.4 | 0.9 | 0.84520 | 2160.1 | 16.4 | 2140.7 | 9.4  | 2122.2 | 9.9  | -1.8 |
| Spot 307           | 97  | 18133.6   | 2.0  | 7.9 | 1.1 | 5.9  | 1.4 | 0.3 | 0.8 | 0.58345 | 1924.0 | 13.6 | 1966.4 | 12.2 | 2011.3 | 20.2 | 4.3  |
| Spot 30€           | 150 | 357066.2  | 2.2  | 8.5 | 0.5 | 5.4  | 1.0 | 0.3 | 0.8 | 0.84700 | 1868.9 | 13.4 | 1887.8 | 8.4  | 1908.6 | 9.3  | 2.1  |
| Spot 30€           | 90  | 11881.5   | 1.8  | 6.3 | 1.9 | 8.7  | 2.0 | 0.4 | 0.8 | 0.40579 | 2203.1 | 15.4 | 2309.2 | 18.5 | 2404.3 | 31.6 | 8.4  |
| Spot 31€           | 73  | 70023.6   | 1.6  | 5.1 | 0.5 | 14.6 | 1.0 | 0.5 | 0.9 | 0.88382 | 2806.9 | 19.4 | 2790.0 | 9.2  | 2777.8 | 7.4  | -1.0 |
| Spot 311           | 132 | 160237.3  | 3.5  | 7.7 | 0.5 | 6.6  | 1.1 | 0.4 | 0.9 | 0.85871 | 2057.3 | 16.2 | 2063.4 | 9.4  | 2069.4 | 9.6  | 0.6  |
| Spot 312           | 123 | 24295.5   | 1.7  | 7.2 | 0.8 | 7.2  | 1.2 | 0.4 | 0.8 | 0.70156 | 2091.1 | 14.7 | 2139.5 | 10.5 | 2186.2 | 14.6 | 4.3  |
| Spot 313           | 111 | 9908.8    | 2.4  | 6.8 | 1.0 | 7.8  | 1.4 | 0.4 | 1.0 | 0.69861 | 2127.6 | 17.5 | 2202.7 | 12.4 | 2273.3 | 17.1 | 6.4  |
| Spot 314           | 119 | 2345.0    | 2.9  | 5.2 | 2.3 | 10.8 | 2.4 | 0.4 | 0.8 | 0.32335 | 2268.3 | 15.1 | 2508.8 | 22.7 | 2709.7 | 38.0 | 16.3 |
| Spot 31€           | 29  | 98809.0   | 3.1  | 7.5 | 0.7 | 7.4  | 1.1 | 0.4 | 0.9 | 0.81019 | 2199.7 | 17.1 | 2157.3 | 10.1 | 2117.1 | 11.7 | -3.9 |
| Run 2 (discordant) |     |           |      |     |     |      |     |     |     |         |        |      |        |      |        |      |      |
| Spot 10€           | 62  | 90982.1   | 4.2  | 7.3 | 0.5 | 8.0  | 1.0 | 0.4 | 0.8 | 0.86752 | 2292.2 | 15.9 | 2234.1 | 8.6  | 2181.2 | 8.2  | -5.1 |
| Spot 127           | 45  | 682021.0  | 1.5  | 4.7 | 0.6 | 18.4 | 1.1 | 0.6 | 0.9 | 0.85617 | 3119.7 | 23.4 | 3011.0 | 10.6 | 2939.2 | 9.2  | -6.1 |
| Spot 13€           | 43  | 2492.6    | 3.4  | 6.0 | 3.3 | 8.3  | 3.5 | 0.4 | 1.1 | 0.32812 | 1981.0 | 19.4 | 2260.7 | 31.3 | 2524.4 | 54.9 | 21.5 |
| Spot 141           | 33  | 36942.0   | 1.9  | 7.1 | 0.5 | 8.8  | 1.1 | 0.5 | 1.0 | 0.89565 | 2408.4 | 20.3 | 2322.6 | 10.3 | 2247.9 | 8.6  | -7.1 |
| Spot 16€           | 85  | 3006662.6 | 2.8  | 8.7 | 0.7 | 5.7  | 1.2 | 0.4 | 1.0 | 0.81683 | 1974.1 | 17.2 | 1926.8 | 10.7 | 1876.4 | 12.8 | -5.2 |
| Spot 171           | 139 | 6901.3    | 2.2  | 7.4 | 0.9 | 5.2  | 1.3 | 0.3 | 0.8 | 0.65544 | 1578.4 | 11.5 | 1847.4 | 10.7 | 2165.4 | 16.5 | 27.1 |
| Spot 19€           | 88  | 615315.9  | 3.4  | 8.6 | 0.6 | 4.1  | 1.2 | 0.3 | 1.1 | 0.88454 | 1464.2 | 14.2 | 1647.5 | 10.0 | 1890.0 | 10.3 | 22.5 |
| Spot 20€           | 20  | 61285.8   | 2.4  | 7.6 | 0.7 | 7.5  | 1.2 | 0.4 | 0.9 | 0.77374 | 2248.4 | 17.3 | 2178.9 | 10.6 | 2114.1 | 13.1 | -6.4 |
| Spot 24€           | 47  | 1066254.6 | 3.3  | 7.6 | 0.7 | 7.5  | 1.1 | 0.4 | 0.9 | 0.76769 | 2238.6 | 16.7 | 2171.1 | 10.3 | 2107.8 | 12.9 | -6.2 |
| Spot 25            | 25  | 191517.8  | 13.6 | 7.6 | 0.8 | 7.7  | 1.4 | 0.4 | 1.1 | 0.83016 | 2263.3 | 21.9 | 2191.1 | 12.4 | 2124.3 | 13.5 | -6.5 |
| Spot 28€           | 137 | 12651.5   | 1.2  | 7.7 | 1.5 | 4.8  | 1.9 | 0.3 | 1.2 | 0.60868 | 1531.1 | 16.1 | 1786.4 | 16.3 | 2099.1 | 27.0 | 27.1 |
| Spot 33            | 72  | 2667.2    | 4.0  | 5.5 | 1.0 | 9.4  | 1.4 | 0.4 | 0.9 | 0.67850 | 2049.6 | 16.4 | 2373.6 | 12.6 | 2664.8 | 16.7 | 23.1 |
| Spot 4             | 61  | 47853.4   | 1.2  | 7.7 | 0.8 | 5.2  | 1.3 | 0.3 | 1.1 | 0.81865 | 1645.4 | 16.0 | 1851.3 | 11.5 | 2091.3 | 13.6 | 21.3 |
| Spot 41            | 160 | 3174.3    | 1.9  | 6.3 | 2.4 | 7.3  | 2.6 | 0.3 | 1.0 | 0.39751 | 1858.9 | 16.8 | 2145.5 | 23.3 | 2432.5 | 40.6 | 23.6 |
| Spot 49            | 24  | 100400.2  | 1.8  | 8.3 | 0.7 | 6.3  | 1.1 | 0.4 | 0.9 | 0.77207 | 2075.5 | 15.3 | 2017.2 | 9.8  | 1958.0 | 12.6 | -6.0 |
| Spot 71            | 145 | 45697.6   | 2.5  | 8.4 | 0.6 | 4.2  | 2.2 | 0.3 | 2.1 | 0.95603 | 1473.9 | 27.3 | 1676.5 | 17.8 | 1940.3 | 11.4 | 24.0 |
| Spot 79            | 170 | 8487.0    | 1.2  | 7.6 | 0.8 | 4.4  | 2.9 | 0.2 | 2.8 | 0.95723 | 1393.1 | 34.5 | 1711.5 | 23.8 | 2126.6 | 14.6 | 34.5 |
| Run 3              |     |           |      |     |     |      |     |     |     |         |        |      |        |      |        |      |      |
| Spot 1             | 92  | 681429.6  | 1.6  | 7.6 | 0.6 | 7.0  | 1.0 | 0.4 | 0.9 | 0.83232 | 2121.7 | 15.8 | 2111.4 | 9.3  | 2101.4 | 10.2 | -1.0 |
| Spot 2             | 157 | 9604.0    | 1.4  | 7.6 | 1.2 | 6.1  | 1.7 | 0.3 | 1.2 | 0.72331 | 1900.5 | 19.9 | 1989.2 | 14.6 | 2082.6 | 20.3 | 8.7  |
| Spot 3             | 122 | 249722.6  | 1.9  | 5.4 | 0.6 | 12.9 | 1.0 | 0.5 | 0.7 | 0.76600 | 2665.1 | 16.0 | 2671.2 | 9.0  | 2675.8 | 10.2 | 0.4  |
| Spot 4             | 220 | 117228.4  | 2.6  | 5.2 | 0.5 | 13.7 | 0.9 | 0.5 | 0.8 | 0.85528 | 2692.6 | 17.1 | 2728.8 | 8.6  | 2755.6 | 7.7  | 2.3  |
| Spot 5             | 59  | 53310.0   | 1.4  | 8.5 | 0.8 | 5.7  | 1.4 | 0.4 | 1.1 | 0.81711 | 1941.5 | 18.7 | 1923.9 | 11.8 | 1905.0 | 14.1 | -1.9 |
| Spot 6             | 118 | 64574.3   | 1.7  | 8.3 | 0.5 | 5.7  | 0.8 | 0.3 | 0.6 | 0.78259 | 1925.9 | 10.7 | 1933.1 | 7.1  | 1940.8 | 9.2  | 0.8  |

|         |     |           |     |     |     |      |     |     |     |         |        |      |        |      |        |      |      |
|---------|-----|-----------|-----|-----|-----|------|-----|-----|-----|---------|--------|------|--------|------|--------|------|------|
| Spot 7  | 81  | 146135.3  | 1.4 | 6.4 | 0.6 | 9.6  | 1.1 | 0.5 | 0.9 | 0.85770 | 2405.7 | 18.9 | 2401.0 | 10.1 | 2396.9 | 9.6  | -0.4 |
| Spot 8  | 169 | 53442.4   | 0.7 | 7.9 | 0.6 | 6.1  | 1.2 | 0.4 | 1.0 | 0.85172 | 1950.5 | 17.3 | 1988.1 | 10.5 | 2027.4 | 11.2 | 3.8  |
| Spot 9  | 215 | 2006030.7 | 0.9 | 7.7 | 0.5 | 6.7  | 1.1 | 0.4 | 1.0 | 0.87964 | 2078.7 | 17.2 | 2077.6 | 9.7  | 2076.4 | 9.2  | -0.1 |
| Spot 10 | 37  | 141655.0  | 1.3 | 5.1 | 0.6 | 14.3 | 1.1 | 0.5 | 0.9 | 0.83727 | 2766.4 | 21.2 | 2768.8 | 10.7 | 2770.5 | 10.1 | 0.1  |
| Spot 11 | 187 | 119428.0  | 3.3 | 7.2 | 0.5 | 7.6  | 1.0 | 0.4 | 0.9 | 0.87161 | 2178.9 | 16.8 | 2183.5 | 9.4  | 2187.7 | 8.9  | 0.4  |
| Spot 12 | 135 | 133413.6  | 2.0 | 5.6 | 0.6 | 12.3 | 1.0 | 0.5 | 0.8 | 0.82728 | 2639.5 | 17.6 | 2627.7 | 9.2  | 2618.7 | 9.2  | -0.8 |
| Spot 13 | 93  | 491389.7  | 1.6 | 7.6 | 0.7 | 7.1  | 1.0 | 0.4 | 0.7 | 0.71448 | 2153.2 | 12.8 | 2128.8 | 8.7  | 2105.3 | 12.0 | -2.3 |
| Spot 15 | 254 | 45290.4   | 2.6 | 7.7 | 0.6 | 6.4  | 1.2 | 0.4 | 1.0 | 0.86324 | 1988.3 | 17.6 | 2034.4 | 10.4 | 2081.5 | 10.6 | 4.5  |
| Spot 16 | 61  | 760197.3  | 2.3 | 7.4 | 0.6 | 7.4  | 1.4 | 0.4 | 1.3 | 0.89240 | 2163.6 | 23.5 | 2160.0 | 12.8 | 2156.5 | 11.3 | -0.3 |
| Spot 17 | 43  | 190272.9  | 1.4 | 7.3 | 0.6 | 7.7  | 1.2 | 0.4 | 1.0 | 0.84289 | 2224.7 | 18.9 | 2194.3 | 10.7 | 2166.0 | 11.2 | -2.7 |
| Spot 18 | 81  | 254519.2  | 0.9 | 8.6 | 0.5 | 5.4  | 0.9 | 0.3 | 0.7 | 0.81554 | 1890.7 | 11.7 | 1886.5 | 7.5  | 1881.9 | 9.1  | -0.5 |
| Spot 19 | 129 | 55069.1   | 1.6 | 5.5 | 0.6 | 12.7 | 1.1 | 0.5 | 0.9 | 0.81081 | 2658.8 | 19.5 | 2656.1 | 10.4 | 2654.0 | 10.7 | -0.2 |
| Spot 20 | 80  | 62447.2   | 1.3 | 7.5 | 0.7 | 7.0  | 1.2 | 0.4 | 1.0 | 0.84328 | 2107.0 | 18.9 | 2112.1 | 11.1 | 2116.9 | 11.7 | 0.5  |
| Spot 21 | 134 | 197280.7  | 2.3 | 5.5 | 0.6 | 12.9 | 1.1 | 0.5 | 0.9 | 0.84705 | 2685.8 | 20.1 | 2675.1 | 10.2 | 2667.0 | 9.5  | -0.7 |
| Spot 22 | 60  | 1264194.3 | 2.0 | 7.7 | 0.8 | 6.6  | 1.2 | 0.4 | 0.9 | 0.74756 | 2041.2 | 15.8 | 2061.2 | 10.7 | 2081.2 | 14.1 | 1.9  |
| Spot 23 | 126 | 1317207.5 | 1.9 | 5.4 | 0.6 | 12.9 | 1.0 | 0.5 | 0.9 | 0.82505 | 2675.9 | 18.9 | 2672.2 | 9.8  | 2669.3 | 9.8  | -0.2 |
| Spot 24 | 168 | 78265.2   | 0.8 | 5.5 | 0.5 | 12.1 | 1.1 | 0.5 | 0.9 | 0.87365 | 2564.8 | 19.5 | 2612.7 | 9.9  | 2650.0 | 8.5  | 3.2  |
| Spot 25 | 66  | 342377.6  | 1.2 | 8.3 | 0.7 | 6.0  | 1.1 | 0.4 | 0.9 | 0.79523 | 1990.2 | 14.8 | 1971.6 | 9.5  | 1952.1 | 11.8 | -2.0 |
| Spot 26 | 201 | 154946.0  | 2.2 | 7.5 | 0.6 | 7.1  | 1.0 | 0.4 | 0.8 | 0.81825 | 2122.7 | 15.2 | 2120.9 | 9.1  | 2119.2 | 10.3 | -0.2 |
| Spot 27 | 183 | 126481.2  | 1.2 | 5.3 | 0.5 | 13.2 | 1.2 | 0.5 | 1.0 | 0.88859 | 2678.4 | 22.9 | 2692.2 | 11.1 | 2702.5 | 8.9  | 0.9  |
| Spot 28 | 126 | 151192.9  | 1.7 | 8.6 | 0.7 | 5.5  | 1.1 | 0.3 | 0.9 | 0.75994 | 1896.0 | 14.2 | 1893.3 | 9.8  | 1890.3 | 13.3 | -0.3 |
| Spot 29 | 97  | 211116.4  | 2.4 | 7.6 | 0.6 | 6.9  | 1.0 | 0.4 | 0.8 | 0.80638 | 2098.0 | 14.3 | 2101.1 | 8.8  | 2104.1 | 10.3 | 0.3  |
| Spot 30 | 183 | 154867.6  | 1.8 | 8.4 | 0.7 | 5.5  | 1.0 | 0.3 | 0.8 | 0.72782 | 1888.7 | 12.5 | 1906.8 | 9.0  | 1926.5 | 12.9 | 2.0  |
| Spot 31 | 127 | 164695.4  | 1.2 | 4.0 | 0.6 | 21.9 | 1.0 | 0.6 | 0.8 | 0.79730 | 3168.6 | 20.4 | 3178.6 | 9.9  | 3184.8 | 9.8  | 0.5  |
| Spot 32 | 297 | 138036.1  | 2.3 | 5.7 | 0.5 | 11.8 | 1.0 | 0.5 | 0.9 | 0.87568 | 2574.1 | 19.3 | 2591.9 | 9.7  | 2605.8 | 8.4  | 1.2  |
| Spot 33 | 61  | 26764.4   | 1.3 | 5.4 | 0.8 | 12.9 | 1.2 | 0.5 | 0.9 | 0.73400 | 2673.9 | 19.2 | 2673.1 | 11.3 | 2672.6 | 13.5 | 0.0  |
| Spot 34 | 29  | #####     | 1.9 | 7.6 | 0.7 | 6.8  | 1.1 | 0.4 | 0.8 | 0.77513 | 2090.9 | 14.9 | 2092.2 | 9.6  | 2093.4 | 12.0 | 0.1  |
| Spot 35 | 9   | 14434.3   | 0.6 | 5.5 | 0.9 | 12.4 | 1.2 | 0.5 | 0.8 | 0.68373 | 2620.0 | 17.4 | 2633.6 | 11.1 | 2644.1 | 14.4 | 0.9  |
| Spot 36 | 27  | 361240.2  | 2.4 | 7.3 | 0.7 | 7.8  | 1.2 | 0.4 | 1.0 | 0.82729 | 2249.1 | 18.6 | 2210.3 | 10.7 | 2174.6 | 11.6 | -3.4 |
| Spot 37 | 121 | 88840.4   | 1.4 | 7.3 | 0.6 | 7.7  | 1.0 | 0.4 | 0.8 | 0.80695 | 2221.5 | 15.4 | 2198.4 | 9.1  | 2176.9 | 10.4 | -2.0 |
| Spot 38 | 88  | 339858.8  | 1.9 | 7.6 | 0.7 | 7.3  | 1.1 | 0.4 | 0.9 | 0.79352 | 2185.5 | 16.4 | 2148.9 | 9.9  | 2114.2 | 11.9 | -3.4 |
| Spot 39 | 105 | 152307.5  | 2.0 | 8.6 | 0.6 | 5.6  | 1.1 | 0.4 | 0.9 | 0.81941 | 1948.6 | 14.6 | 1919.5 | 9.1  | 1888.2 | 10.9 | -3.2 |
| Spot 40 | 34  | 124233.7  | 3.2 | 7.1 | 0.7 | 8.0  | 1.2 | 0.4 | 1.0 | 0.82611 | 2241.0 | 19.4 | 2227.9 | 11.2 | 2215.9 | 12.1 | -1.1 |
| Spot 41 | 189 | 115264.5  | 1.6 | 8.5 | 0.5 | 5.5  | 1.0 | 0.3 | 0.9 | 0.89905 | 1902.1 | 15.5 | 1898.2 | 9.0  | 1893.9 | 8.2  | -0.4 |
| Spot 42 | 46  | 83562.2   | 2.2 | 7.3 | 0.7 | 7.9  | 1.2 | 0.4 | 1.0 | 0.81022 | 2278.5 | 18.5 | 2225.2 | 10.7 | 2176.5 | 12.1 | -4.7 |
| Spot 43 | 108 | 609258.4  | 4.0 | 3.9 | 0.5 | 23.1 | 1.1 | 0.7 | 1.0 | 0.88518 | 3263.7 | 25.5 | 3231.1 | 11.0 | 3210.8 | 8.3  | -1.6 |
| Spot 44 | 194 | 142492.2  | 1.2 | 5.4 | 0.5 | 13.2 | 1.0 | 0.5 | 0.8 | 0.86308 | 2720.4 | 18.2 | 2695.1 | 9.0  | 2676.2 | 7.9  | -1.7 |
| Spot 45 | 101 | 16057.9   | 1.4 | 7.8 | 1.4 | 5.8  | 1.9 | 0.3 | 1.3 | 0.66296 | 1868.5 | 20.3 | 1951.3 | 16.4 | 2040.4 | 25.0 | 8.4  |
| Spot 46 | 146 | 73455.8   | 2.5 | 6.1 | 0.5 | 10.4 | 1.0 | 0.5 | 0.9 | 0.88894 | 2465.5 | 18.7 | 2472.7 | 9.5  | 2478.7 | 7.9  | 0.5  |
| Spot 47 | 219 | 23335.1   | 1.6 | 5.4 | 1.0 | 11.4 | 2.8 | 0.5 | 2.6 | 0.92926 | 2421.5 | 52.0 | 2556.9 | 25.9 | 2666.0 | 17.0 | 9.2  |
| Spot 48 | 233 | 315168.1  | 1.2 | 8.6 | 0.5 | 5.4  | 1.0 | 0.3 | 0.9 | 0.89321 | 1868.5 | 15.1 | 1880.2 | 8.9  | 1893.1 | 8.4  | 1.3  |
| Spot 49 | 141 | 32327.6   | 1.6 | 8.3 | 0.6 | 5.3  | 1.0 | 0.3 | 0.8 | 0.79933 | 1794.5 | 12.7 | 1864.3 | 8.7  | 1942.9 | 10.9 | 7.6  |
| Spot 50 | 82  | 40569.6   | 1.9 | 7.3 | 0.6 | 7.3  | 1.2 | 0.4 | 1.0 | 0.87875 | 2137.4 | 18.5 | 2154.7 | 10.3 | 2171.2 | 9.6  | 1.6  |



|         |     |           |     |     |     |      |     |     |     |         |        |      |        |      |        |      |      |
|---------|-----|-----------|-----|-----|-----|------|-----|-----|-----|---------|--------|------|--------|------|--------|------|------|
| Spot 51 | 183 | 359583.2  | 2.3 | 7.6 | 0.6 | 6.9  | 0.9 | 0.4 | 0.8 | 0.80184 | 2097.9 | 13.5 | 2098.3 | 8.3  | 2098.6 | 9.8  | 0.0  |
| Spot 52 | 5   | 6601.3    | 4.2 | 5.7 | 1.0 | 11.4 | 1.4 | 0.5 | 0.9 | 0.68068 | 2544.2 | 19.4 | 2558.7 | 12.7 | 2570.1 | 16.6 | 1.0  |
| Spot 53 | 205 | 34041.2   | 1.5 | 7.0 | 0.5 | 7.9  | 1.0 | 0.4 | 0.9 | 0.86069 | 2206.1 | 16.4 | 2223.9 | 9.2  | 2240.4 | 9.0  | 1.5  |
| Spot 54 | 107 | 128913.0  | 1.6 | 5.5 | 0.6 | 13.0 | 1.2 | 0.5 | 1.0 | 0.83793 | 2704.7 | 21.9 | 2679.4 | 11.1 | 2660.2 | 10.7 | -1.7 |
| Spot 55 | 161 | 2471318.0 | 2.6 | 7.6 | 0.6 | 7.2  | 1.1 | 0.4 | 1.0 | 0.87231 | 2156.2 | 18.2 | 2133.1 | 10.1 | 2110.8 | 9.7  | -2.1 |
| Spot 56 | 88  | 108651.9  | 0.8 | 8.5 | 0.5 | 5.5  | 1.2 | 0.3 | 1.0 | 0.89401 | 1908.8 | 17.1 | 1903.4 | 9.9  | 1897.4 | 9.3  | -0.6 |
| Spot 57 | 132 | 29604.7   | 2.1 | 4.9 | 0.6 | 14.7 | 1.1 | 0.5 | 1.0 | 0.86864 | 2729.3 | 21.5 | 2797.4 | 10.6 | 2846.8 | 9.0  | 4.1  |
| Spot 58 | 119 | 124976.0  | 1.6 | 7.4 | 0.5 | 7.6  | 1.1 | 0.4 | 0.9 | 0.87276 | 2210.5 | 17.4 | 2180.6 | 9.6  | 2152.6 | 9.1  | -2.7 |
| Spot 59 | 107 | 27253.7   | 1.7 | 5.4 | 0.8 | 13.0 | 2.0 | 0.5 | 1.8 | 0.90282 | 2673.2 | 38.8 | 2676.9 | 18.5 | 2679.6 | 14.0 | 0.2  |
| Spot 60 | 61  | 92025.0   | 3.6 | 7.4 | 0.6 | 7.7  | 1.1 | 0.4 | 1.0 | 0.86316 | 2235.8 | 18.4 | 2196.1 | 10.1 | 2159.3 | 9.9  | -3.5 |
| Spot 61 | 113 | 1418203.3 | 1.8 | 7.3 | 0.7 | 7.8  | 1.3 | 0.4 | 1.1 | 0.86054 | 2225.1 | 20.9 | 2205.7 | 11.6 | 2187.7 | 11.4 | -1.7 |
| Spot 62 | 168 | 217945.6  | 2.8 | 7.7 | 0.6 | 7.0  | 1.3 | 0.4 | 1.1 | 0.87654 | 2123.9 | 20.2 | 2106.8 | 11.3 | 2090.1 | 10.8 | -1.6 |
| Spot 63 | 135 | 95183.0   | 1.1 | 8.6 | 0.5 | 5.5  | 1.0 | 0.3 | 0.8 | 0.84249 | 1914.7 | 13.9 | 1902.3 | 8.6  | 1888.7 | 9.6  | -1.4 |
| Spot 64 | 259 | 21138.7   | 2.8 | 7.9 | 1.8 | 5.9  | 2.1 | 0.3 | 1.2 | 0.54625 | 1897.9 | 19.1 | 1965.8 | 18.5 | 2038.0 | 31.5 | 6.9  |
| Spot 65 | 171 | 12996.2   | 1.0 | 7.7 | 1.6 | 5.5  | 2.1 | 0.3 | 1.4 | 0.67237 | 1754.5 | 21.8 | 1900.6 | 18.1 | 2064.1 | 27.5 | 15.0 |
| Spot 66 | 144 | 224466.4  | 1.7 | 8.6 | 0.5 | 5.5  | 0.9 | 0.3 | 0.7 | 0.84010 | 1900.0 | 12.0 | 1892.9 | 7.5  | 1885.2 | 8.5  | -0.8 |
| Spot 67 | 48  | 63071.2   | 2.3 | 6.9 | 0.6 | 8.7  | 1.3 | 0.4 | 1.1 | 0.86766 | 2338.6 | 21.7 | 2304.0 | 11.6 | 2273.4 | 10.9 | -2.9 |
| Spot 68 | 197 | 47805.4   | 3.5 | 7.6 | 0.5 | 6.9  | 1.0 | 0.4 | 0.9 | 0.85454 | 2074.2 | 15.6 | 2095.6 | 9.1  | 2116.7 | 9.4  | 2.0  |
| Spot 69 | 112 | 867364.3  | 2.0 | 5.1 | 0.6 | 15.0 | 1.1 | 0.6 | 0.9 | 0.82811 | 2830.0 | 21.7 | 2812.3 | 10.9 | 2799.6 | 10.5 | -1.1 |
| Spot 71 | 99  | 47664.2   | 1.2 | 8.7 | 0.6 | 5.4  | 1.2 | 0.3 | 1.1 | 0.89464 | 1898.9 | 18.2 | 1887.0 | 10.6 | 1874.0 | 9.9  | -1.3 |
| Spot 72 | 217 | 140218.9  | 1.2 | 7.6 | 0.5 | 7.0  | 1.0 | 0.4 | 0.9 | 0.86926 | 2105.2 | 16.3 | 2106.2 | 9.3  | 2107.2 | 9.1  | 0.1  |
| Spot 73 | 150 | 95563.5   | 1.9 | 8.4 | 0.5 | 5.8  | 0.8 | 0.4 | 0.6 | 0.78417 | 1959.4 | 10.6 | 1945.6 | 6.9  | 1931.0 | 8.9  | -1.5 |
| Spot 74 | 143 | 120773.8  | 1.9 | 5.4 | 0.6 | 12.9 | 1.1 | 0.5 | 0.9 | 0.82775 | 2652.7 | 19.0 | 2669.3 | 9.9  | 2681.8 | 9.8  | 1.1  |
| Spot 75 | 151 | 45002.3   | 2.4 | 8.4 | 0.6 | 5.6  | 1.1 | 0.3 | 0.8 | 0.80250 | 1906.9 | 13.9 | 1915.7 | 9.1  | 1925.2 | 11.2 | 0.9  |
| Spot 76 | 90  | 101302.9  | 1.4 | 7.7 | 0.5 | 7.0  | 1.0 | 0.4 | 0.8 | 0.86774 | 2122.2 | 15.0 | 2109.2 | 8.5  | 2096.5 | 8.4  | -1.2 |
| Spot 77 | 55  | 155495.8  | 1.6 | 7.0 | 0.7 | 8.4  | 1.2 | 0.4 | 0.9 | 0.78069 | 2290.3 | 17.3 | 2276.5 | 10.4 | 2264.0 | 12.4 | -1.2 |
| Spot 78 | 155 | 61291.3   | 2.1 | 8.2 | 0.7 | 6.0  | 1.0 | 0.4 | 0.8 | 0.76305 | 1977.9 | 13.3 | 1977.1 | 8.9  | 1976.3 | 11.8 | -0.1 |
| Spot 79 | 229 | 10039.1   | 1.9 | 5.1 | 0.5 | 12.9 | 1.1 | 0.5 | 1.0 | 0.88679 | 2546.2 | 21.1 | 2673.1 | 10.7 | 2770.5 | 8.6  | 8.1  |
| Spot 80 | 126 | 31443.3   | 1.1 | 7.2 | 0.5 | 7.6  | 1.0 | 0.4 | 0.9 | 0.88851 | 2158.0 | 16.3 | 2181.8 | 9.0  | 2204.2 | 8.0  | 2.1  |
| Spot 81 | 290 | 50052.8   | 1.8 | 7.7 | 0.6 | 6.5  | 1.0 | 0.4 | 0.7 | 0.77499 | 2010.9 | 13.0 | 2045.6 | 8.5  | 2080.6 | 10.8 | 3.4  |
| Spot 82 | 231 | 8823.1    | 1.4 | 7.5 | 2.1 | 5.5  | 2.7 | 0.3 | 1.8 | 0.65590 | 1726.3 | 27.3 | 1908.3 | 23.6 | 2112.3 | 36.3 | 18.3 |
| Spot 83 | 149 | 99388.7   | 1.3 | 6.1 | 0.6 | 11.2 | 1.1 | 0.5 | 0.9 | 0.82921 | 2583.6 | 18.9 | 2536.2 | 10.0 | 2498.5 | 10.1 | -3.4 |
| Spot 84 | 148 | 267069.7  | 1.7 | 8.2 | 0.5 | 6.0  | 1.1 | 0.4 | 1.0 | 0.90633 | 1991.1 | 17.3 | 1981.6 | 9.7  | 1971.7 | 8.4  | -1.0 |
| Spot 85 | 39  | 41429.8   | 1.7 | 5.5 | 0.6 | 12.6 | 1.0 | 0.5 | 0.8 | 0.78646 | 2651.8 | 17.3 | 2653.3 | 9.5  | 2654.5 | 10.4 | 0.1  |
| Spot 86 | 253 | 26626.7   | 2.2 | 8.1 | 0.7 | 5.5  | 1.1 | 0.3 | 0.9 | 0.80678 | 1813.5 | 14.5 | 1897.4 | 9.8  | 1990.5 | 11.9 | 8.9  |
| Spot 87 | 85  | 185467.9  | 2.4 | 5.4 | 0.6 | 12.9 | 1.3 | 0.5 | 1.1 | 0.87736 | 2650.7 | 24.2 | 2672.4 | 11.9 | 2688.9 | 10.0 | 1.4  |
| Spot 88 | 144 | 615052.6  | 1.6 | 8.5 | 0.5 | 5.4  | 0.7 | 0.3 | 0.6 | 0.75732 | 1872.3 | 9.2  | 1889.7 | 6.4  | 1908.8 | 8.7  | 1.9  |
| Spot 89 | 204 | 117159.4  | 3.0 | 8.5 | 0.6 | 5.6  | 1.1 | 0.3 | 0.9 | 0.85430 | 1910.4 | 15.2 | 1913.4 | 9.3  | 1916.6 | 10.0 | 0.3  |
| Spot 90 | 85  | 137541.7  | 1.1 | 8.3 | 0.6 | 6.2  | 1.0 | 0.4 | 0.8 | 0.77750 | 2033.0 | 13.3 | 1998.0 | 8.6  | 1962.0 | 11.0 | -3.6 |
| Spot 91 | 160 | 170715.0  | 1.4 | 7.6 | 0.5 | 7.0  | 0.9 | 0.4 | 0.7 | 0.77572 | 2129.8 | 12.1 | 2114.8 | 7.7  | 2100.2 | 9.6  | -1.4 |
| Spot 92 | 173 | 1224868.6 | 2.0 | 5.4 | 0.5 | 12.9 | 1.1 | 0.5 | 1.0 | 0.88816 | 2668.7 | 21.8 | 2673.2 | 10.6 | 2676.7 | 8.5  | 0.3  |
| Spot 93 | 68  | 945704.7  | 2.9 | 7.6 | 0.4 | 7.4  | 0.9 | 0.4 | 0.8 | 0.88193 | 2197.1 | 15.0 | 2155.8 | 8.2  | 2116.7 | 7.5  | -3.8 |
| Spot 94 | 163 | 272024.8  | 1.8 | 5.4 | 0.7 | 12.0 | 1.1 | 0.5 | 0.9 | 0.77718 | 2503.4 | 18.1 | 2606.0 | 10.5 | 2686.7 | 11.7 | 6.8  |

|          |     |           |     |     |     |      |     |     |     |         |        |      |        |      |        |      |      |
|----------|-----|-----------|-----|-----|-----|------|-----|-----|-----|---------|--------|------|--------|------|--------|------|------|
| Spot 95  | 77  | 88830.2   | 1.5 | 7.4 | 0.7 | 7.7  | 1.3 | 0.4 | 1.1 | 0.83400 | 2231.9 | 20.9 | 2196.7 | 12.0 | 2164.0 | 12.8 | -3.1 |
| Spot 96  | 81  | 94582.8   | 1.9 | 7.5 | 0.7 | 7.2  | 1.1 | 0.4 | 0.9 | 0.79817 | 2146.6 | 15.7 | 2139.2 | 9.6  | 2132.1 | 11.4 | -0.7 |
| Spot 97  | 204 | 24078.3   | 1.8 | 7.1 | 0.6 | 7.7  | 1.1 | 0.4 | 0.9 | 0.85729 | 2157.1 | 17.2 | 2193.3 | 9.8  | 2227.3 | 9.8  | 3.2  |
| Spot 98  | 76  | 80258.2   | 2.2 | 5.5 | 0.6 | 13.0 | 0.9 | 0.5 | 0.6 | 0.69816 | 2709.6 | 13.3 | 2681.8 | 8.1  | 2660.9 | 10.2 | -1.8 |
| Spot 99  | 220 | 56156.8   | 1.2 | 8.4 | 0.4 | 5.5  | 1.0 | 0.3 | 0.9 | 0.90841 | 1894.4 | 14.2 | 1907.5 | 8.2  | 1921.7 | 7.2  | 1.4  |
| Spot 100 | 91  | 172038.4  | 1.1 | 7.3 | 0.6 | 7.7  | 1.1 | 0.4 | 1.0 | 0.86552 | 2217.2 | 18.4 | 2191.6 | 10.2 | 2167.7 | 9.9  | -2.3 |
| Spot 101 | 71  | 116601.4  | 2.0 | 5.5 | 0.7 | 12.8 | 1.1 | 0.5 | 0.9 | 0.78759 | 2666.9 | 19.7 | 2666.2 | 10.8 | 2665.6 | 11.7 | -0.1 |
| Spot 102 | 182 | 11369.3   | 1.3 | 7.7 | 0.7 | 5.5  | 1.3 | 0.3 | 1.2 | 0.86686 | 1752.6 | 17.7 | 1907.2 | 11.4 | 2079.7 | 11.7 | 15.7 |
| Spot 103 | 130 | 228336.6  | 2.3 | 8.6 | 0.7 | 5.5  | 1.2 | 0.3 | 1.0 | 0.82045 | 1897.2 | 15.8 | 1897.1 | 10.0 | 1897.0 | 12.0 | 0.0  |
| Spot 104 | 190 | 68528.2   | 2.0 | 8.5 | 0.5 | 5.5  | 1.0 | 0.3 | 0.8 | 0.85427 | 1897.1 | 13.7 | 1903.7 | 8.4  | 1910.7 | 9.1  | 0.7  |
| Spot 105 | 132 | 112244.6  | 1.2 | 8.6 | 0.5 | 5.4  | 1.2 | 0.3 | 1.0 | 0.88567 | 1892.9 | 16.9 | 1888.1 | 10.0 | 1882.9 | 9.7  | -0.5 |
| Spot 106 | 252 | 181975.5  | 1.3 | 5.5 | 0.6 | 12.9 | 1.2 | 0.5 | 1.0 | 0.84578 | 2680.4 | 21.4 | 2672.4 | 10.9 | 2666.4 | 10.2 | -0.5 |
| Spot 107 | 141 | 86074.2   | 1.7 | 7.6 | 0.6 | 7.1  | 1.1 | 0.4 | 1.0 | 0.83132 | 2139.9 | 17.4 | 2119.5 | 10.2 | 2099.8 | 11.2 | -1.9 |
| Spot 108 | 174 | 118990.8  | 1.2 | 7.9 | 0.6 | 6.5  | 1.1 | 0.4 | 0.9 | 0.82941 | 2041.6 | 16.5 | 2040.5 | 10.0 | 2039.4 | 11.2 | -0.1 |
| Spot 109 | 122 | 107871.9  | 1.8 | 8.3 | 0.7 | 6.0  | 1.3 | 0.4 | 1.1 | 0.83974 | 1989.9 | 18.2 | 1975.1 | 11.0 | 1959.7 | 12.3 | -1.5 |
| Spot 110 | 138 | 104501.1  | 2.2 | 7.2 | 0.6 | 7.8  | 1.1 | 0.4 | 1.0 | 0.84701 | 2221.7 | 17.9 | 2209.7 | 10.1 | 2198.7 | 10.4 | -1.0 |
| Spot 111 | 172 | 52280.7   | 1.4 | 8.4 | 0.5 | 5.6  | 0.9 | 0.3 | 0.8 | 0.85698 | 1913.7 | 13.4 | 1920.4 | 8.2  | 1927.6 | 8.7  | 0.7  |
| Spot 112 | 97  | 244189.6  | 2.2 | 7.6 | 0.7 | 7.1  | 1.2 | 0.4 | 1.0 | 0.82620 | 2140.1 | 17.9 | 2129.2 | 10.6 | 2118.6 | 11.8 | -1.0 |
| Spot 113 | 193 | 60562.0   | 1.5 | 7.3 | 0.7 | 7.3  | 1.3 | 0.4 | 1.0 | 0.80831 | 2106.1 | 18.2 | 2145.5 | 11.2 | 2183.5 | 12.9 | 3.5  |
| Spot 114 | 249 | 15539.7   | 2.0 | 7.7 | 1.2 | 6.1  | 1.6 | 0.3 | 1.0 | 0.63906 | 1923.4 | 16.6 | 1993.0 | 13.7 | 2066.0 | 21.2 | 6.9  |
| Spot 115 | 117 | 1788293.3 | 1.1 | 7.7 | 0.6 | 6.7  | 1.1 | 0.4 | 0.9 | 0.80762 | 2045.7 | 15.6 | 2069.6 | 9.7  | 2093.6 | 11.4 | 2.3  |
| Spot 116 | 84  | 174421.9  | 1.6 | 7.6 | 0.6 | 7.0  | 1.1 | 0.4 | 0.9 | 0.83632 | 2123.1 | 16.6 | 2115.2 | 9.8  | 2107.5 | 10.6 | -0.7 |
| Spot 117 | 138 | 97458.1   | 1.8 | 5.5 | 0.6 | 13.0 | 1.1 | 0.5 | 0.9 | 0.85153 | 2694.3 | 20.0 | 2681.6 | 10.1 | 2672.0 | 9.3  | -0.8 |
| Spot 118 | 101 | 15246.2   | 1.5 | 7.1 | 0.6 | 7.5  | 1.0 | 0.4 | 0.8 | 0.79340 | 2115.3 | 13.9 | 2168.1 | 8.7  | 2218.4 | 10.2 | 4.6  |
| Spot 119 | 88  | 144776.8  | 1.3 | 7.6 | 0.5 | 7.2  | 0.7 | 0.4 | 0.5 | 0.71905 | 2152.8 | 9.8  | 2132.6 | 6.6  | 2113.2 | 9.1  | -1.9 |
| Spot 120 | 74  | 206175.2  | 2.7 | 7.4 | 0.6 | 7.5  | 1.2 | 0.4 | 1.0 | 0.84013 | 2202.8 | 18.4 | 2173.6 | 10.5 | 2146.1 | 11.1 | -2.6 |
| Spot 121 | 235 | 1332081.2 | 1.9 | 8.6 | 0.5 | 5.5  | 1.0 | 0.3 | 0.9 | 0.88370 | 1922.2 | 15.1 | 1905.6 | 8.8  | 1887.6 | 8.7  | -1.8 |
| Spot 122 | 190 | 45464.5   | 1.9 | 5.5 | 0.5 | 12.7 | 1.2 | 0.5 | 1.1 | 0.91452 | 2649.5 | 23.7 | 2661.0 | 11.2 | 2669.7 | 8.0  | 0.8  |
| Spot 123 | 120 | 350197.8  | 2.2 | 5.9 | 0.5 | 11.4 | 1.2 | 0.5 | 1.1 | 0.89128 | 2559.0 | 22.5 | 2556.0 | 11.1 | 2553.6 | 9.1  | -0.2 |
| Spot 124 | 140 | 156552.0  | 3.2 | 7.2 | 0.5 | 7.8  | 0.9 | 0.4 | 0.7 | 0.82181 | 2216.3 | 13.3 | 2205.2 | 7.7  | 2194.9 | 8.5  | -1.0 |
| Spot 125 | 247 | 564306.1  | 2.5 | 7.3 | 0.6 | 7.6  | 1.2 | 0.4 | 1.0 | 0.87324 | 2191.7 | 18.9 | 2181.8 | 10.4 | 2172.6 | 9.9  | -0.9 |
| Spot 126 | 106 | 77203.2   | 2.3 | 8.5 | 0.7 | 5.5  | 1.2 | 0.3 | 1.0 | 0.84200 | 1901.9 | 17.0 | 1900.1 | 10.5 | 1898.1 | 11.9 | -0.2 |
| Spot 127 | 195 | 25021.6   | 1.8 | 8.1 | 0.9 | 5.5  | 1.5 | 0.3 | 1.1 | 0.77080 | 1817.9 | 18.0 | 1893.8 | 12.6 | 1978.1 | 16.7 | 8.1  |
| Spot 128 | 97  | 172876.5  | 1.4 | 8.5 | 0.6 | 5.6  | 0.8 | 0.3 | 0.6 | 0.68175 | 1927.3 | 9.6  | 1913.9 | 7.3  | 1899.4 | 11.1 | -1.5 |
| Spot 129 | 95  | 46687.1   | 1.2 | 8.0 | 0.6 | 6.1  | 0.9 | 0.4 | 0.7 | 0.79520 | 1988.9 | 12.7 | 1996.4 | 8.1  | 2004.1 | 10.0 | 0.8  |
| Spot 130 | 61  | 91755.3   | 2.6 | 5.6 | 0.5 | 12.5 | 1.0 | 0.5 | 0.8 | 0.83623 | 2668.5 | 17.8 | 2639.4 | 9.1  | 2617.2 | 8.9  | -2.0 |
| Spot 131 | 87  | 36776.6   | 1.8 | 5.3 | 0.6 | 13.6 | 1.0 | 0.5 | 0.8 | 0.78242 | 2720.1 | 17.9 | 2721.8 | 9.7  | 2723.0 | 10.6 | 0.1  |
| Spot 132 | 140 | 29305.3   | 1.4 | 8.4 | 0.6 | 5.5  | 1.0 | 0.3 | 0.8 | 0.80705 | 1878.4 | 13.4 | 1903.9 | 8.8  | 1931.8 | 10.8 | 2.8  |
| Spot 133 | 111 | 94977.9   | 1.6 | 5.5 | 0.6 | 13.2 | 1.3 | 0.5 | 1.1 | 0.88688 | 2725.1 | 24.7 | 2695.0 | 11.8 | 2672.4 | 9.6  | -2.0 |
| Spot 134 | 245 | 108048.0  | 2.1 | 8.6 | 0.6 | 4.9  | 3.0 | 0.3 | 2.9 | 0.97966 | 1732.1 | 44.2 | 1807.1 | 25.1 | 1894.7 | 10.7 | 8.6  |
| Spot 135 | 33  | 2516.2    | 2.8 | 5.2 | 2.7 | 11.2 | 3.0 | 0.4 | 1.2 | 0.41313 | 2334.0 | 23.9 | 2542.2 | 27.6 | 2712.7 | 44.5 | 14.0 |
| Spot 136 | 223 | 39835.3   | 2.0 | 8.3 | 0.7 | 5.6  | 1.1 | 0.3 | 0.9 | 0.79156 | 1884.2 | 13.9 | 1911.1 | 9.2  | 1940.4 | 11.7 | 2.9  |
| Spot 137 | 270 | 23639.6   | 2.0 | 8.2 | 0.6 | 5.5  | 1.2 | 0.3 | 1.1 | 0.87668 | 1823.4 | 17.1 | 1896.0 | 10.5 | 1976.5 | 10.5 | 7.7  |

|          |     |           |      |     |     |      |     |     |     |         |        |      |        |      |        |      |      |
|----------|-----|-----------|------|-----|-----|------|-----|-----|-----|---------|--------|------|--------|------|--------|------|------|
| Spot 13  | 97  | #####     | 1.6  | 5.6 | 0.6 | 12.4 | 1.1 | 0.5 | 1.0 | 0.85953 | 2652.9 | 21.3 | 2633.4 | 10.7 | 2618.5 | 9.7  | -1.3 |
| Spot 14  | 223 | 566620.9  | 2.7  | 7.3 | 0.6 | 7.6  | 1.0 | 0.4 | 0.8 | 0.80300 | 2196.3 | 14.7 | 2189.1 | 8.8  | 2182.4 | 10.2 | -0.6 |
| Spot 141 | 154 | 180542.7  | 4.5  | 4.3 | 0.4 | 19.5 | 0.9 | 0.6 | 0.8 | 0.86600 | 3081.9 | 19.1 | 3065.6 | 8.7  | 3055.0 | 7.2  | -0.9 |
| Spot 142 | 77  | 111807.3  | 1.0  | 8.6 | 0.7 | 5.6  | 1.3 | 0.3 | 1.1 | 0.83558 | 1927.9 | 17.8 | 1912.9 | 11.0 | 1896.7 | 12.6 | -1.6 |
| Spot 143 | 96  | 127670.7  | 2.4  | 7.6 | 0.6 | 7.0  | 1.0 | 0.4 | 0.9 | 0.82925 | 2127.4 | 15.6 | 2112.2 | 9.2  | 2097.3 | 10.2 | -1.4 |
| Spot 144 | 37  | 66548.1   | 2.2  | 7.3 | 0.8 | 7.5  | 1.2 | 0.4 | 0.9 | 0.75321 | 2172.0 | 16.7 | 2168.1 | 10.8 | 2164.3 | 13.8 | -0.4 |
| Spot 145 | 236 | 291606.5  | 2.1  | 5.5 | 0.5 | 12.9 | 0.9 | 0.5 | 0.7 | 0.84767 | 2678.9 | 16.4 | 2668.9 | 8.3  | 2661.3 | 7.8  | -0.7 |
| Spot 146 | 155 | 65626.1   | 1.0  | 5.0 | 0.5 | 14.5 | 0.7 | 0.5 | 0.6 | 0.78225 | 2730.3 | 12.7 | 2783.5 | 6.9  | 2822.3 | 7.4  | 3.3  |
| Spot 147 | 184 | 30565.2   | 1.0  | 5.4 | 0.4 | 12.5 | 1.0 | 0.5 | 0.9 | 0.88852 | 2574.3 | 18.1 | 2644.5 | 9.0  | 2698.6 | 7.3  | 4.6  |
| Spot 148 | 91  | 601042.7  | 8.9  | 4.9 | 0.5 | 15.5 | 1.0 | 0.6 | 0.9 | 0.87830 | 2862.8 | 20.5 | 2847.6 | 9.6  | 2836.8 | 7.9  | -0.9 |
| Spot 149 | 115 | 65992.6   | 1.6  | 8.5 | 0.6 | 5.4  | 1.0 | 0.3 | 0.8 | 0.80848 | 1865.9 | 13.2 | 1880.0 | 8.6  | 1895.6 | 10.6 | 1.6  |
| Spot 150 | 273 | 748803.6  | 3.4  | 5.4 | 0.5 | 13.1 | 1.0 | 0.5 | 0.9 | 0.85596 | 2693.0 | 19.4 | 2683.3 | 9.7  | 2676.1 | 8.8  | -0.6 |
| Spot 151 | 94  | 545282.3  | 1.3  | 7.6 | 0.5 | 6.9  | 0.9 | 0.4 | 0.7 | 0.85123 | 2088.8 | 13.1 | 2093.9 | 7.7  | 2098.8 | 8.0  | 0.5  |
| Spot 152 | 178 | 169768.1  | 4.2  | 7.5 | 0.5 | 7.1  | 0.9 | 0.4 | 0.7 | 0.82413 | 2135.1 | 13.3 | 2129.1 | 7.9  | 2123.4 | 8.8  | -0.6 |
| Spot 153 | 126 | 12391.1   | 2.1  | 7.8 | 0.8 | 5.8  | 1.0 | 0.3 | 0.7 | 0.68451 | 1863.6 | 11.6 | 1952.8 | 9.0  | 2048.7 | 13.4 | 9.0  |
| Spot 154 | 103 | 1447222.6 | 1.1  | 7.4 | 0.5 | 7.2  | 1.0 | 0.4 | 0.8 | 0.83336 | 2132.9 | 14.6 | 2140.0 | 8.6  | 2146.8 | 9.3  | 0.6  |
| Spot 155 | 103 | 628663.3  | 1.3  | 7.7 | 0.7 | 6.8  | 1.2 | 0.4 | 1.0 | 0.79873 | 2080.1 | 17.1 | 2084.7 | 10.6 | 2089.2 | 12.7 | 0.4  |
| Spot 156 | 68  | 104836.6  | 1.0  | 7.5 | 0.5 | 7.2  | 1.0 | 0.4 | 0.8 | 0.83273 | 2137.7 | 14.7 | 2138.3 | 8.6  | 2138.8 | 9.4  | 0.1  |
| Spot 157 | 246 | 94119.9   | 2.1  | 7.5 | 0.5 | 6.8  | 1.0 | 0.4 | 0.8 | 0.82355 | 2058.3 | 13.8 | 2091.8 | 8.4  | 2125.0 | 9.5  | 3.1  |
| Spot 158 | 91  | 173904.2  | 1.4  | 7.4 | 0.4 | 7.2  | 1.1 | 0.4 | 1.0 | 0.90843 | 2118.5 | 17.2 | 2134.6 | 9.4  | 2150.1 | 7.7  | 1.5  |
| Spot 160 | 149 | 89076.7   | 1.1  | 8.1 | 0.6 | 6.1  | 0.9 | 0.4 | 0.7 | 0.80524 | 1994.6 | 12.9 | 1991.3 | 8.1  | 1988.0 | 9.8  | -0.3 |
| Spot 162 | 55  | 58408.2   | 1.8  | 7.5 | 0.7 | 7.2  | 1.1 | 0.4 | 0.9 | 0.78863 | 2134.1 | 16.4 | 2134.2 | 10.2 | 2134.3 | 12.3 | 0.0  |
| Spot 163 | 106 | 316404.4  | 1.8  | 7.4 | 0.5 | 7.5  | 1.2 | 0.4 | 1.1 | 0.88681 | 2174.4 | 19.4 | 2170.4 | 10.6 | 2166.6 | 9.6  | -0.4 |
| Spot 164 | 151 | 360212.9  | 1.3  | 3.7 | 0.6 | 21.7 | 1.0 | 0.6 | 0.8 | 0.80387 | 2998.4 | 19.3 | 3168.6 | 9.7  | 3278.2 | 9.4  | 8.5  |
| Spot 165 | 98  | 107472.7  | 2.3  | 8.5 | 0.6 | 5.6  | 0.9 | 0.3 | 0.7 | 0.73523 | 1920.6 | 11.2 | 1915.2 | 7.9  | 1909.3 | 11.1 | -0.6 |
| Spot 166 | 162 | 163067.3  | 1.6  | 8.3 | 0.5 | 5.7  | 1.1 | 0.3 | 1.0 | 0.88127 | 1920.1 | 16.4 | 1935.2 | 9.7  | 1951.5 | 9.4  | 1.6  |
| Spot 167 | 413 | 100679.7  | 1.7  | 4.5 | 0.5 | 19.2 | 0.9 | 0.6 | 0.8 | 0.84677 | 3139.6 | 19.4 | 3053.3 | 8.9  | 2996.9 | 7.9  | -4.8 |
| Spot 168 | 126 | 143814.8  | 2.1  | 5.5 | 0.7 | 12.9 | 1.1 | 0.5 | 0.9 | 0.80600 | 2671.3 | 20.0 | 2670.1 | 10.7 | 2669.2 | 11.1 | -0.1 |
| Spot 169 | 199 | 1179487.9 | 11.2 | 7.6 | 0.4 | 7.0  | 1.0 | 0.4 | 0.9 | 0.88977 | 2112.8 | 15.4 | 2115.2 | 8.5  | 2117.5 | 7.7  | 0.2  |
| Spot 170 | 41  | 136117.8  | 1.8  | 5.5 | 0.5 | 13.0 | 0.9 | 0.5 | 0.8 | 0.83255 | 2698.2 | 17.1 | 2681.0 | 8.8  | 2668.1 | 8.5  | -1.1 |
| Spot 171 | 184 | 94044.2   | 1.9  | 8.6 | 0.7 | 5.8  | 1.0 | 0.4 | 0.8 | 0.77404 | 1990.1 | 13.7 | 1945.4 | 9.0  | 1898.2 | 11.8 | -4.8 |
| Spot 172 | 177 | 33327.4   | 1.4  | 7.2 | 0.6 | 6.8  | 1.6 | 0.4 | 1.5 | 0.92171 | 1974.6 | 25.2 | 2081.8 | 14.2 | 2189.5 | 10.8 | 9.8  |
| Spot 173 | 75  | 202467.1  | 0.6  | 5.7 | 0.7 | 12.0 | 1.1 | 0.5 | 0.9 | 0.78420 | 2608.3 | 18.5 | 2606.2 | 10.3 | 2604.6 | 11.3 | -0.1 |
| Spot 174 | 127 | 34794.2   | 1.5  | 7.3 | 0.6 | 7.5  | 1.0 | 0.4 | 0.8 | 0.78164 | 2162.6 | 14.7 | 2175.2 | 9.2  | 2187.1 | 11.1 | 1.1  |
| Spot 175 | 166 | 112601.9  | 2.7  | 7.6 | 0.5 | 7.1  | 1.2 | 0.4 | 1.0 | 0.89695 | 2140.3 | 18.9 | 2121.3 | 10.3 | 2102.9 | 9.0  | -1.8 |
| Spot 176 | 143 | 2645754.6 | 1.8  | 5.5 | 0.5 | 12.9 | 0.9 | 0.5 | 0.8 | 0.83138 | 2670.6 | 16.9 | 2673.6 | 8.8  | 2675.9 | 8.6  | 0.2  |
| Spot 177 | 128 | 94622.9   | 2.2  | 8.6 | 0.5 | 5.5  | 1.1 | 0.3 | 1.0 | 0.87834 | 1917.5 | 16.0 | 1904.9 | 9.5  | 1891.2 | 9.5  | -1.4 |
| Spot 178 | 113 | 194565.0  | 1.9  | 5.5 | 0.6 | 12.9 | 1.1 | 0.5 | 0.9 | 0.83451 | 2672.2 | 20.2 | 2674.0 | 10.4 | 2675.3 | 10.1 | 0.1  |
| Spot 179 | 219 | 181685.3  | 4.8  | 5.0 | 0.6 | 14.9 | 1.1 | 0.5 | 1.0 | 0.86768 | 2800.2 | 22.0 | 2809.4 | 10.6 | 2816.0 | 9.1  | 0.6  |
| Spot 180 | 108 | 159019.6  | 1.8  | 7.0 | 0.5 | 8.2  | 1.0 | 0.4 | 0.8 | 0.84998 | 2245.7 | 16.0 | 2253.4 | 9.0  | 2260.3 | 9.0  | 0.6  |
| Spot 181 | 148 | 32353.2   | 2.1  | 8.3 | 0.7 | 5.6  | 1.0 | 0.3 | 0.7 | 0.68613 | 1877.7 | 11.0 | 1914.1 | 8.4  | 1953.8 | 12.7 | 3.9  |
| Spot 182 | 59  | 128699.1  | 2.4  | 5.5 | 0.5 | 13.3 | 1.0 | 0.5 | 0.8 | 0.85459 | 2733.2 | 18.6 | 2699.4 | 9.2  | 2674.2 | 8.4  | -2.2 |
| Spot 183 | 206 | 36868.2   | 3.3  | 7.4 | 0.6 | 7.1  | 1.3 | 0.4 | 1.2 | 0.89331 | 2085.8 | 21.0 | 2123.7 | 11.7 | 2160.7 | 10.3 | 3.5  |

|          |      |           |      |     |     |      |     |     |     |         |        |      |        |      |        |      |      |
|----------|------|-----------|------|-----|-----|------|-----|-----|-----|---------|--------|------|--------|------|--------|------|------|
| Spot 184 | 102  | 105157.3  | 2.2  | 7.3 | 0.7 | 7.5  | 1.0 | 0.4 | 0.7 | 0.67917 | 2150.6 | 12.2 | 2170.9 | 8.8  | 2190.1 | 12.5 | 1.8  |
| Spot 185 | 56   | 36101.7   | 1.0  | 7.5 | 0.6 | 7.2  | 1.1 | 0.4 | 1.0 | 0.86756 | 2141.4 | 17.6 | 2134.8 | 9.9  | 2128.5 | 9.7  | -0.6 |
| Spot 186 | 161  | 95767.8   | 1.6  | 7.4 | 0.5 | 7.4  | 0.9 | 0.4 | 0.8 | 0.84881 | 2173.0 | 14.7 | 2160.6 | 8.4  | 2148.9 | 8.7  | -1.1 |
| Spot 187 | 114  | 105834.7  | 2.1  | 5.6 | 0.6 | 12.4 | 0.9 | 0.5 | 0.7 | 0.77812 | 2628.2 | 15.9 | 2633.3 | 8.9  | 2637.3 | 9.9  | 0.3  |
| Spot 188 | 106  | 88595.2   | 1.5  | 7.7 | 0.6 | 7.0  | 1.2 | 0.4 | 1.0 | 0.85879 | 2129.4 | 18.7 | 2108.1 | 10.7 | 2087.4 | 10.8 | -2.0 |
| Spot 189 | 255  | 67873.5   | 2.4  | 5.0 | 0.5 | 13.8 | 1.3 | 0.5 | 1.2 | 0.91378 | 2636.0 | 25.3 | 2735.1 | 12.1 | 2809.1 | 8.5  | 6.2  |
| Spot 190 | 63   | 7147.5    | 1.0  | 3.9 | 0.7 | 21.8 | 1.1 | 0.6 | 0.8 | 0.78682 | 3136.1 | 20.8 | 3176.7 | 10.3 | 3202.5 | 10.4 | 2.1  |
| Spot 191 | 281  | 119904.8  | 0.9  | 7.7 | 0.4 | 6.7  | 0.9 | 0.4 | 0.8 | 0.86652 | 2070.1 | 13.6 | 2077.8 | 7.8  | 2085.5 | 7.8  | 0.7  |
| Spot 192 | 157  | 930948.9  | 1.7  | 5.5 | 0.6 | 13.3 | 1.0 | 0.5 | 0.8 | 0.82149 | 2731.5 | 18.7 | 2699.1 | 9.7  | 2674.9 | 9.7  | -2.1 |
| Spot 193 | 63   | 83898.3   | 1.5  | 7.3 | 0.6 | 8.0  | 1.1 | 0.4 | 1.0 | 0.83042 | 2273.5 | 18.2 | 2229.3 | 10.3 | 2189.0 | 11.1 | -3.9 |
| Spot 194 | 101  | 456696.2  | 2.2  | 5.5 | 0.6 | 13.0 | 1.0 | 0.5 | 0.9 | 0.82113 | 2691.6 | 18.9 | 2682.7 | 9.9  | 2676.1 | 9.9  | -0.6 |
| Spot 195 | 23   | 490383.4  | 1.4  | 3.7 | 0.6 | 24.8 | 1.5 | 0.7 | 1.3 | 0.90890 | 3320.0 | 35.0 | 3299.1 | 14.5 | 3286.3 | 9.7  | -1.0 |
| Spot 196 | 164  | 2164843.5 | 2.2  | 5.4 | 0.6 | 13.4 | 1.0 | 0.5 | 0.8 | 0.80393 | 2735.3 | 17.1 | 2709.6 | 9.0  | 2690.5 | 9.4  | -1.7 |
| Spot 197 | 79   | 417715.1  | 2.2  | 5.4 | 0.6 | 12.7 | 1.0 | 0.5 | 0.9 | 0.81602 | 2627.9 | 18.4 | 2659.9 | 9.8  | 2684.4 | 10.0 | 2.1  |
| Spot 198 | 81   | 206129.4  | 1.5  | 6.9 | 0.5 | 8.6  | 1.1 | 0.4 | 1.0 | 0.87155 | 2301.0 | 18.4 | 2296.7 | 9.9  | 2292.9 | 9.2  | -0.4 |
| Spot 199 | 132  | 21408.0   | 1.0  | 7.1 | 0.6 | 7.6  | 0.9 | 0.4 | 0.6 | 0.71011 | 2143.5 | 11.2 | 2184.0 | 7.8  | 2222.2 | 10.6 | 3.5  |
| Spot 200 | 126  | 68264.3   | 1.6  | 5.4 | 0.5 | 13.2 | 0.9 | 0.5 | 0.8 | 0.83004 | 2693.0 | 16.8 | 2692.0 | 8.7  | 2691.3 | 8.5  | -0.1 |
| Spot 201 | 94   | 333869.8  | 2.2  | 7.2 | 0.5 | 7.8  | 1.0 | 0.4 | 0.9 | 0.85334 | 2215.2 | 16.1 | 2210.9 | 9.1  | 2207.0 | 9.1  | -0.4 |
| Spot 202 | 109  | 145507.4  | 1.5  | 8.6 | 0.5 | 5.6  | 1.1 | 0.3 | 0.9 | 0.85679 | 1924.1 | 15.1 | 1913.6 | 9.1  | 1902.2 | 9.8  | -1.2 |
| Spot 203 | 150  | 20358.8   | 3.4  | 7.0 | 0.7 | 7.3  | 1.3 | 0.4 | 1.1 | 0.83408 | 2050.6 | 19.5 | 2152.5 | 11.9 | 2251.2 | 12.7 | 8.9  |
| Spot 204 | 23   | 15887.1   | 1.6  | 7.2 | 1.1 | 7.3  | 1.5 | 0.4 | 1.1 | 0.70451 | 2107.6 | 19.6 | 2149.7 | 13.8 | 2190.1 | 19.1 | 3.8  |
| Spot 205 | 189  | 108004.7  | 1.3  | 8.6 | 0.5 | 5.4  | 1.0 | 0.3 | 0.9 | 0.86025 | 1867.6 | 14.4 | 1884.8 | 8.9  | 1903.7 | 9.5  | 1.9  |
| Spot 206 | 108  | 90362.8   | 2.0  | 8.5 | 0.5 | 5.4  | 1.0 | 0.3 | 0.9 | 0.85564 | 1859.7 | 14.0 | 1887.0 | 8.7  | 1917.1 | 9.4  | 3.0  |
| Spot 207 | 37   | 67458.5   | 1.7  | 5.4 | 0.6 | 13.4 | 0.9 | 0.5 | 0.7 | 0.74250 | 2729.5 | 14.9 | 2711.5 | 8.5  | 2698.1 | 10.0 | -1.2 |
| Spot 208 | 145  | 48203.0   | 1.7  | 8.4 | 0.6 | 5.5  | 1.1 | 0.3 | 0.9 | 0.84806 | 1881.9 | 14.6 | 1903.1 | 9.0  | 1926.2 | 10.0 | 2.3  |
| Spot 209 | 119  | 384927.1  | 1.9  | 8.6 | 0.5 | 5.6  | 1.0 | 0.3 | 0.8 | 0.84917 | 1928.9 | 13.5 | 1911.5 | 8.2  | 1892.6 | 9.0  | -1.9 |
| Spot 210 | 81   | 123799.3  | 1.9  | 7.8 | 0.6 | 6.6  | 1.1 | 0.4 | 0.9 | 0.81915 | 2052.7 | 16.0 | 2060.9 | 9.8  | 2069.2 | 11.2 | 0.8  |
| Spot 211 | 101  | 24322.2   | 1.1  | 7.9 | 0.5 | 6.0  | 0.8 | 0.3 | 0.6 | 0.78185 | 1921.5 | 10.2 | 1975.7 | 6.8  | 2033.0 | 8.6  | 5.5  |
| Spot 212 | 149  | 362385.0  | 4.5  | 4.7 | 0.5 | 17.2 | 0.9 | 0.6 | 0.8 | 0.86357 | 2954.9 | 18.6 | 2945.9 | 8.7  | 2939.8 | 7.4  | -0.5 |
| Spot 213 | 39   | 96324.6   | 2.3  | 6.1 | 0.6 | 11.0 | 1.2 | 0.5 | 1.1 | 0.88706 | 2558.7 | 22.6 | 2518.9 | 11.2 | 2487.0 | 9.4  | -2.9 |
| Spot 214 | 197  | 580874.7  | 1.9  | 5.5 | 0.6 | 12.8 | 1.0 | 0.5 | 0.8 | 0.82585 | 2651.6 | 18.0 | 2666.5 | 9.5  | 2677.8 | 9.4  | 1.0  |
| Spot 215 | 68   | 145329.9  | 1.6  | 7.1 | 0.5 | 8.2  | 0.9 | 0.4 | 0.7 | 0.83201 | 2262.6 | 14.3 | 2254.8 | 8.1  | 2247.8 | 8.6  | -0.7 |
| Spot 216 | 72   | 71554.1   | 2.3  | 5.5 | 0.4 | 13.0 | 0.9 | 0.5 | 0.8 | 0.87809 | 2688.3 | 18.2 | 2681.0 | 8.9  | 2675.5 | 7.5  | -0.5 |
| Spot 217 | 199  | 109452.2  | 1.3  | 8.6 | 0.7 | 5.5  | 1.4 | 0.3 | 1.2 | 0.87439 | 1902.5 | 20.1 | 1899.5 | 12.0 | 1896.2 | 12.2 | -0.3 |
| Spot 218 | 137  | 86111.8   | 1.3  | 8.3 | 0.7 | 5.6  | 1.1 | 0.3 | 0.8 | 0.76734 | 1896.3 | 13.8 | 1922.4 | 9.5  | 1950.8 | 12.6 | 2.8  |
| Spot 219 | 1168 | 8108.2    | 10.1 | 7.2 | 1.8 | 7.4  | 2.1 | 0.4 | 1.2 | 0.56067 | 2126.8 | 21.6 | 2162.7 | 19.1 | 2197.0 | 30.6 | 3.2  |
| Spot 220 | 175  | 35295.6   | 0.9  | 8.4 | 0.5 | 5.7  | 0.9 | 0.3 | 0.8 | 0.83502 | 1927.4 | 12.7 | 1926.9 | 7.9  | 1926.3 | 9.0  | -0.1 |
| Spot 221 | 164  | 133024.8  | 1.3  | 7.9 | 0.5 | 6.6  | 1.0 | 0.4 | 0.8 | 0.83194 | 2067.9 | 14.0 | 2055.5 | 8.4  | 2043.1 | 9.3  | -1.2 |
| Spot 222 | 52   | 46204.8   | 1.3  | 5.5 | 0.7 | 12.6 | 1.1 | 0.5 | 0.9 | 0.79316 | 2620.4 | 18.8 | 2647.4 | 10.3 | 2668.1 | 11.1 | 1.8  |
| Spot 223 | 123  | 91996.9   | 3.5  | 8.5 | 0.6 | 5.6  | 1.0 | 0.3 | 0.8 | 0.80125 | 1924.6 | 14.0 | 1919.0 | 9.0  | 1912.9 | 11.3 | -0.6 |
| Spot 224 | 80   | 49779.6   | 1.1  | 8.3 | 0.8 | 5.9  | 1.1 | 0.4 | 0.7 | 0.68122 | 1974.9 | 12.7 | 1967.4 | 9.5  | 1959.5 | 14.3 | -0.8 |
| Spot 225 | 63   | 100260.7  | 1.3  | 8.6 | 0.7 | 5.5  | 1.1 | 0.3 | 0.9 | 0.80984 | 1893.8 | 15.2 | 1898.2 | 9.8  | 1903.1 | 12.1 | 0.5  |
| Spot 226 | 205  | 72195.7   | 1.4  | 8.5 | 0.6 | 5.6  | 1.2 | 0.3 | 1.0 | 0.85168 | 1906.3 | 16.5 | 1912.0 | 10.1 | 1918.2 | 11.0 | 0.6  |

|          |     |          |     |     |     |      |     |     |     |         |        |      |        |      |        |      |      |
|----------|-----|----------|-----|-----|-----|------|-----|-----|-----|---------|--------|------|--------|------|--------|------|------|
| Spot 227 | 159 | 764080.1 | 1.2 | 8.7 | 0.4 | 5.4  | 1.0 | 0.3 | 1.0 | 0.92952 | 1899.4 | 15.7 | 1890.8 | 8.8  | 1881.4 | 6.8  | -1.0 |
| Spot 228 | 207 | 85747.6  | 2.0 | 7.7 | 0.6 | 6.9  | 1.0 | 0.4 | 0.8 | 0.83040 | 2100.3 | 15.1 | 2100.4 | 9.0  | 2100.5 | 9.9  | 0.0  |
| Spot 229 | 103 | 868955.5 | 2.2 | 5.5 | 0.6 | 13.0 | 1.1 | 0.5 | 0.9 | 0.84169 | 2692.9 | 20.4 | 2680.1 | 10.4 | 2670.4 | 9.9  | -0.8 |
| Spot 230 | 109 | 101389.7 | 2.4 | 7.6 | 0.6 | 7.2  | 0.8 | 0.4 | 0.6 | 0.69397 | 2141.6 | 10.6 | 2133.9 | 7.5  | 2126.6 | 10.6 | -0.7 |
| Spot 231 | 57  | 19415.9  | 1.7 | 7.8 | 0.9 | 6.6  | 1.5 | 0.4 | 1.2 | 0.78975 | 2062.9 | 21.3 | 2064.7 | 13.5 | 2066.5 | 16.5 | 0.2  |
| Spot 232 | 121 | 89575.0  | 1.2 | 7.4 | 0.5 | 7.4  | 0.9 | 0.4 | 0.7 | 0.83996 | 2176.0 | 13.4 | 2164.4 | 7.7  | 2153.5 | 8.2  | -1.0 |
| Spot 233 | 77  | 331088.8 | 1.7 | 7.5 | 0.6 | 7.3  | 0.8 | 0.4 | 0.6 | 0.70836 | 2150.5 | 11.0 | 2147.7 | 7.6  | 2144.9 | 10.5 | -0.3 |
| Spot 234 | 46  | 49011.1  | 1.3 | 7.1 | 0.8 | 7.9  | 1.2 | 0.4 | 0.9 | 0.74904 | 2191.0 | 17.0 | 2218.3 | 11.0 | 2243.5 | 14.0 | 2.3  |
| Spot 235 | 132 | 43721.0  | 1.4 | 8.3 | 0.6 | 5.8  | 0.8 | 0.4 | 0.6 | 0.73506 | 1948.5 | 10.1 | 1953.3 | 7.1  | 1958.4 | 9.9  | 0.5  |
| Spot 236 | 47  | 216210.5 | 2.4 | 7.5 | 0.7 | 7.4  | 1.1 | 0.4 | 0.8 | 0.74587 | 2188.8 | 14.7 | 2157.8 | 9.5  | 2128.3 | 12.4 | -2.8 |
| Spot 237 | 62  | 71876.0  | 1.7 | 7.3 | 0.6 | 7.7  | 1.0 | 0.4 | 0.8 | 0.77551 | 2197.8 | 14.5 | 2193.7 | 9.0  | 2189.9 | 11.0 | -0.4 |
| Spot 238 | 91  | 685322.2 | 3.4 | 7.5 | 0.5 | 7.4  | 1.1 | 0.4 | 0.9 | 0.87779 | 2181.8 | 17.1 | 2161.1 | 9.4  | 2141.6 | 8.8  | -1.9 |
| Spot 239 | 153 | 283322.2 | 1.1 | 7.7 | 0.6 | 6.9  | 1.0 | 0.4 | 0.8 | 0.80749 | 2121.5 | 14.1 | 2104.6 | 8.6  | 2088.1 | 10.0 | -1.6 |
| Spot 240 | 57  | 180556.7 | 3.4 | 7.6 | 0.5 | 7.1  | 0.9 | 0.4 | 0.7 | 0.81949 | 2128.0 | 13.5 | 2122.6 | 8.1  | 2117.3 | 9.2  | -0.5 |
| Spot 241 | 40  | 42266.8  | 1.8 | 7.2 | 0.5 | 8.1  | 0.8 | 0.4 | 0.7 | 0.80464 | 2283.4 | 12.9 | 2245.8 | 7.6  | 2211.7 | 8.6  | -3.2 |
| Spot 242 | 210 | 90971.2  | 1.3 | 8.2 | 0.4 | 5.8  | 1.0 | 0.3 | 1.0 | 0.92624 | 1913.8 | 15.9 | 1944.2 | 9.0  | 1976.8 | 7.0  | 3.2  |
| Spot 243 | 130 | 217693.7 | 3.0 | 7.5 | 0.6 | 7.1  | 1.0 | 0.4 | 0.8 | 0.82824 | 2106.0 | 14.7 | 2127.4 | 8.8  | 2148.0 | 9.6  | 2.0  |
| Spot 244 | 58  | 90297.1  | 1.6 | 7.5 | 0.6 | 7.4  | 0.9 | 0.4 | 0.7 | 0.75877 | 2177.2 | 12.4 | 2156.7 | 7.9  | 2137.1 | 10.1 | -1.9 |
| Spot 245 | 152 | 158616.6 | 2.5 | 8.4 | 0.6 | 5.9  | 1.0 | 0.4 | 0.9 | 0.84804 | 1984.2 | 15.2 | 1964.6 | 9.1  | 1944.0 | 9.9  | -2.1 |
| Spot 246 | 146 | 73746.4  | 1.7 | 8.2 | 0.7 | 5.6  | 1.4 | 0.3 | 1.2 | 0.86468 | 1872.6 | 19.5 | 1922.4 | 11.9 | 1976.5 | 12.4 | 5.3  |
| Spot 247 | 76  | 58630.2  | 2.2 | 6.3 | 0.5 | 10.1 | 0.9 | 0.5 | 0.7 | 0.79541 | 2440.8 | 14.6 | 2443.9 | 8.3  | 2446.5 | 9.3  | 0.2  |
| Spot 248 | 185 | 38497.4  | 3.4 | 7.2 | 0.7 | 6.9  | 1.0 | 0.4 | 0.8 | 0.73853 | 2004.5 | 13.4 | 2100.3 | 9.3  | 2195.6 | 12.3 | 8.7  |
| Spot 249 | 155 | 193502.8 | 2.6 | 8.6 | 0.7 | 5.5  | 1.2 | 0.3 | 1.0 | 0.81588 | 1903.8 | 16.3 | 1897.7 | 10.4 | 1890.9 | 12.6 | -0.7 |
| Spot 250 | 212 | 195120.9 | 1.5 | 8.6 | 0.6 | 5.4  | 1.3 | 0.3 | 1.1 | 0.88883 | 1867.6 | 18.4 | 1879.3 | 10.9 | 1892.3 | 10.5 | 1.3  |
| Spot 251 | 240 | 23741.1  | 1.3 | 8.0 | 0.5 | 5.3  | 1.1 | 0.3 | 0.9 | 0.85624 | 1732.3 | 13.8 | 1867.3 | 9.1  | 2021.1 | 9.7  | 14.3 |
| Spot 252 | 123 | 25747.0  | 1.7 | 8.4 | 0.7 | 5.7  | 1.1 | 0.3 | 0.8 | 0.72145 | 1914.0 | 12.8 | 1925.3 | 9.3  | 1937.4 | 13.3 | 1.2  |
| Spot 253 | 45  | 14618.0  | 1.0 | 6.7 | 1.1 | 8.4  | 1.3 | 0.4 | 0.7 | 0.53390 | 2217.3 | 13.2 | 2277.6 | 12.0 | 2332.2 | 19.1 | 4.9  |
| Spot 254 | 117 | 120065.2 | 0.6 | 8.3 | 0.5 | 6.0  | 0.8 | 0.4 | 0.6 | 0.81588 | 1977.3 | 10.9 | 1968.6 | 6.8  | 1959.5 | 8.1  | -0.9 |
| Spot 255 | 143 | 435865.1 | 1.6 | 7.6 | 0.8 | 7.1  | 1.7 | 0.4 | 1.5 | 0.88597 | 2122.9 | 27.2 | 2121.4 | 15.1 | 2119.9 | 13.8 | -0.1 |
| Spot 256 | 74  | 15636.3  | 1.2 | 7.2 | 1.0 | 7.3  | 1.3 | 0.4 | 0.8 | 0.63241 | 2081.6 | 15.1 | 2144.8 | 12.0 | 2205.8 | 18.0 | 5.6  |
| Spot 257 | 120 | 123944.2 | 1.2 | 8.6 | 0.5 | 5.4  | 0.9 | 0.3 | 0.7 | 0.78288 | 1877.7 | 11.0 | 1880.5 | 7.4  | 1883.6 | 9.6  | 0.3  |
| Spot 258 | 137 | 352896.3 | 1.2 | 6.9 | 0.5 | 8.4  | 1.0 | 0.4 | 0.8 | 0.85798 | 2277.9 | 16.2 | 2275.3 | 8.9  | 2272.8 | 8.7  | -0.2 |
| Spot 259 | 131 | 95765.2  | 2.1 | 7.1 | 0.5 | 7.8  | 1.0 | 0.4 | 0.9 | 0.85718 | 2179.9 | 16.3 | 2206.6 | 9.3  | 2231.4 | 9.2  | 2.3  |
| Spot 260 | 111 | 9409.1   | 1.5 | 5.7 | 0.8 | 11.0 | 1.0 | 0.5 | 0.6 | 0.59671 | 2427.5 | 12.3 | 2523.8 | 9.4  | 2602.2 | 13.6 | 6.7  |
| Spot 261 | 92  | 276775.8 | 2.6 | 5.5 | 0.5 | 13.0 | 1.1 | 0.5 | 1.0 | 0.88918 | 2690.3 | 22.5 | 2681.0 | 10.8 | 2673.9 | 8.7  | -0.6 |
| Spot 262 | 173 | 170510.7 | 2.0 | 8.5 | 0.6 | 5.5  | 1.0 | 0.3 | 0.8 | 0.77955 | 1911.0 | 12.8 | 1907.6 | 8.6  | 1903.8 | 11.2 | -0.4 |
| Spot 263 | 55  | 103770.1 | 1.0 | 6.7 | 0.6 | 8.9  | 1.0 | 0.4 | 0.8 | 0.80440 | 2321.5 | 16.1 | 2326.9 | 9.4  | 2331.6 | 10.5 | 0.4  |
| Spot 264 | 214 | 10108.0  | 1.0 | 6.6 | 0.6 | 8.3  | 1.3 | 0.4 | 1.2 | 0.89545 | 2178.2 | 21.6 | 2268.4 | 11.8 | 2350.7 | 9.9  | 7.3  |
| Spot 265 | 149 | 192265.0 | 1.4 | 7.8 | 0.5 | 6.8  | 0.8 | 0.4 | 0.6 | 0.72758 | 2099.5 | 10.2 | 2081.2 | 6.9  | 2063.2 | 9.4  | -1.8 |
| Spot 267 | 87  | 403545.2 | 2.8 | 7.4 | 0.6 | 7.3  | 0.9 | 0.4 | 0.8 | 0.80333 | 2156.3 | 13.9 | 2152.0 | 8.4  | 2147.9 | 9.8  | -0.4 |
| Spot 268 | 61  | 107146.7 | 0.9 | 7.6 | 0.7 | 7.2  | 1.1 | 0.4 | 0.8 | 0.73444 | 2166.1 | 14.4 | 2134.5 | 9.5  | 2104.3 | 12.7 | -2.9 |
| Spot 269 | 137 | 625460.7 | 2.0 | 5.6 | 0.5 | 12.6 | 0.9 | 0.5 | 0.7 | 0.80752 | 2663.3 | 16.4 | 2650.8 | 8.7  | 2641.4 | 9.1  | -0.8 |
| Spot 270 | 63  | #####    | 2.1 | 7.6 | 0.7 | 7.3  | 1.0 | 0.4 | 0.7 | 0.70648 | 2171.6 | 13.6 | 2144.0 | 9.3  | 2117.7 | 13.0 | -2.5 |

|          |     |           |     |     |     |      |     |     |     |         |        |      |        |      |        |      |      |
|----------|-----|-----------|-----|-----|-----|------|-----|-----|-----|---------|--------|------|--------|------|--------|------|------|
| Spot 271 | 128 | 204546.0  | 2.1 | 5.5 | 0.5 | 12.9 | 1.1 | 0.5 | 1.0 | 0.89070 | 2670.2 | 22.2 | 2669.6 | 10.7 | 2669.1 | 8.6  | 0.0  |
| Spot 272 | 152 | 942151.4  | 1.9 | 8.5 | 0.7 | 5.5  | 1.2 | 0.3 | 1.0 | 0.84687 | 1897.0 | 17.1 | 1904.3 | 10.6 | 1912.2 | 11.7 | 0.8  |
| Spot 273 | 133 | 157937.5  | 0.9 | 7.7 | 0.5 | 6.7  | 0.9 | 0.4 | 0.7 | 0.79369 | 2064.7 | 12.3 | 2074.1 | 7.7  | 2083.5 | 9.4  | 0.9  |
| Spot 274 | 16  | 24887.6   | 1.1 | 8.5 | 0.9 | 5.3  | 1.3 | 0.3 | 0.9 | 0.71860 | 1828.4 | 14.4 | 1861.4 | 10.7 | 1898.5 | 15.7 | 3.7  |
| Spot 275 | 94  | 36489.5   | 3.3 | 7.1 | 0.6 | 8.1  | 1.2 | 0.4 | 1.0 | 0.84815 | 2284.7 | 19.8 | 2246.5 | 11.0 | 2211.7 | 11.2 | -3.3 |
| Spot 276 | 15  | 15446.1   | 0.4 | 5.6 | 0.7 | 12.9 | 1.1 | 0.5 | 0.9 | 0.79397 | 2731.1 | 20.1 | 2675.0 | 10.7 | 2632.8 | 11.5 | -3.7 |
| Spot 277 | 173 | 259892.7  | 2.5 | 5.5 | 0.6 | 13.1 | 1.0 | 0.5 | 0.8 | 0.81005 | 2718.4 | 18.2 | 2690.1 | 9.5  | 2668.9 | 9.8  | -1.9 |
| Spot 278 | 183 | 12039.1   | 2.1 | 7.6 | 1.0 | 6.1  | 1.3 | 0.3 | 0.8 | 0.61711 | 1898.3 | 12.9 | 1988.0 | 11.1 | 2082.7 | 17.7 | 8.9  |
| Spot 279 | 141 | 103481.3  | 0.7 | 8.3 | 0.7 | 5.5  | 1.2 | 0.3 | 0.9 | 0.76876 | 1878.8 | 14.6 | 1907.2 | 10.0 | 1938.2 | 13.3 | 3.1  |
| Spot 280 | 38  | 86598.4   | 2.0 | 3.8 | 1.0 | 24.8 | 1.5 | 0.7 | 1.1 | 0.75073 | 3353.9 | 29.1 | 3299.8 | 14.5 | 3267.2 | 15.4 | -2.7 |
| Spot 281 | 117 | 1167701.8 | 2.6 | 5.5 | 0.6 | 13.0 | 1.2 | 0.5 | 1.0 | 0.87083 | 2691.3 | 22.5 | 2678.2 | 11.1 | 2668.3 | 9.6  | -0.9 |
| Spot 282 | 149 | 651684.3  | 1.8 | 5.4 | 0.5 | 12.7 | 0.9 | 0.5 | 0.8 | 0.85005 | 2640.1 | 17.1 | 2658.8 | 8.7  | 2673.1 | 8.1  | 1.2  |
| Spot 283 | 81  | 53667.1   | 1.0 | 5.6 | 0.6 | 12.1 | 1.0 | 0.5 | 0.9 | 0.83945 | 2621.1 | 19.0 | 2615.9 | 9.8  | 2611.8 | 9.5  | -0.4 |
| Spot 284 | 112 | 82817.7   | 1.5 | 7.6 | 0.6 | 7.1  | 1.1 | 0.4 | 0.9 | 0.82633 | 2151.5 | 17.2 | 2125.4 | 10.1 | 2100.2 | 11.2 | -2.4 |
| Spot 285 | 245 | 246745.3  | 4.7 | 6.3 | 0.6 | 9.7  | 1.3 | 0.4 | 1.1 | 0.88585 | 2389.3 | 22.1 | 2408.3 | 11.5 | 2424.4 | 9.9  | 1.4  |
| Spot 286 | 115 | 42816.6   | 1.6 | 7.4 | 0.5 | 7.2  | 0.9 | 0.4 | 0.8 | 0.81527 | 2150.7 | 14.0 | 2142.7 | 8.4  | 2135.0 | 9.5  | -0.7 |
| Spot 287 | 70  | 90126.0   | 2.4 | 7.4 | 0.5 | 7.2  | 1.0 | 0.4 | 0.9 | 0.87025 | 2127.2 | 15.5 | 2135.6 | 8.8  | 2143.7 | 8.5  | 0.8  |
| Spot 288 | 28  | 177639.7  | 2.7 | 6.5 | 0.7 | 9.7  | 1.2 | 0.5 | 1.0 | 0.84479 | 2427.1 | 21.0 | 2404.7 | 11.3 | 2385.8 | 11.2 | -1.7 |
| Spot 289 | 281 | 211266.6  | 3.1 | 5.5 | 0.7 | 13.0 | 1.2 | 0.5 | 1.0 | 0.82627 | 2698.1 | 21.6 | 2677.4 | 11.2 | 2661.8 | 11.1 | -1.4 |
| Spot 291 | 76  | 89704.0   | 3.4 | 7.5 | 0.5 | 7.2  | 1.0 | 0.4 | 0.9 | 0.85088 | 2131.0 | 15.7 | 2132.8 | 9.1  | 2134.6 | 9.4  | 0.2  |
| Spot 292 | 169 | 20880.6   | 5.0 | 5.5 | 0.5 | 11.5 | 1.0 | 0.5 | 0.9 | 0.87571 | 2457.0 | 18.2 | 2568.1 | 9.5  | 2657.0 | 8.2  | 7.5  |
| Spot 293 | 76  | 199951.9  | 1.9 | 5.8 | 0.6 | 11.4 | 1.2 | 0.5 | 1.1 | 0.87461 | 2558.5 | 22.3 | 2558.6 | 11.3 | 2558.7 | 9.8  | 0.0  |
| Spot 294 | 199 | 422392.5  | 2.2 | 5.0 | 0.5 | 15.2 | 1.1 | 0.6 | 1.0 | 0.88298 | 2844.2 | 22.7 | 2825.4 | 10.6 | 2812.0 | 8.6  | -1.1 |
| Spot 295 | 92  | 7204.3    | 2.0 | 5.6 | 1.1 | 10.9 | 1.4 | 0.4 | 0.8 | 0.56979 | 2377.5 | 15.8 | 2510.6 | 12.9 | 2620.0 | 19.0 | 9.3  |
| Spot 296 | 29  | 111731.0  | 0.5 | 7.6 | 0.7 | 7.1  | 1.1 | 0.4 | 0.9 | 0.78564 | 2145.8 | 16.2 | 2118.6 | 10.1 | 2092.2 | 12.3 | -2.6 |
| Spot 297 | 105 | 714972.2  | 1.3 | 7.2 | 0.7 | 7.7  | 1.1 | 0.4 | 0.9 | 0.80285 | 2189.0 | 16.9 | 2194.6 | 10.2 | 2199.8 | 11.8 | 0.5  |
| Spot 298 | 53  | 117618.5  | 3.1 | 7.4 | 0.6 | 7.4  | 1.1 | 0.4 | 0.9 | 0.84052 | 2173.3 | 16.9 | 2164.1 | 9.7  | 2155.5 | 10.3 | -0.8 |
| Spot 299 | 58  | 580283.8  | 2.8 | 7.5 | 0.6 | 7.1  | 0.9 | 0.4 | 0.7 | 0.75391 | 2121.9 | 11.8 | 2118.6 | 7.7  | 2115.3 | 10.0 | -0.3 |
| Spot 300 | 190 | 317001.4  | 2.2 | 5.5 | 0.5 | 13.1 | 1.1 | 0.5 | 1.0 | 0.89122 | 2728.7 | 22.0 | 2684.2 | 10.5 | 2650.9 | 8.4  | -2.9 |
| Spot 301 | 244 | 1977041.7 | 1.6 | 5.5 | 0.4 | 12.6 | 0.9 | 0.5 | 0.8 | 0.86900 | 2661.3 | 16.6 | 2651.5 | 8.3  | 2644.1 | 7.2  | -0.6 |
| Spot 302 | 90  | 117875.8  | 1.7 | 7.6 | 0.6 | 6.9  | 1.0 | 0.4 | 0.8 | 0.76175 | 2110.7 | 13.6 | 2101.1 | 8.8  | 2091.6 | 11.3 | -0.9 |
| Spot 303 | 165 | 1744640.9 | 2.0 | 7.2 | 0.6 | 7.7  | 1.5 | 0.4 | 1.4 | 0.92142 | 2207.1 | 26.3 | 2199.3 | 13.7 | 2192.0 | 10.3 | -0.7 |
| Spot 304 | 158 | 89769.8   | 1.3 | 8.5 | 0.5 | 5.3  | 1.0 | 0.3 | 0.9 | 0.84741 | 1862.9 | 13.8 | 1876.8 | 8.6  | 1892.3 | 9.6  | 1.6  |
| Spot 305 | 107 | 145365.5  | 2.6 | 8.6 | 0.5 | 5.5  | 1.1 | 0.3 | 1.0 | 0.88914 | 1921.2 | 16.9 | 1896.5 | 9.8  | 1869.6 | 9.4  | -2.8 |
| Spot 306 | 59  | 71950.6   | 1.8 | 7.5 | 0.6 | 7.3  | 1.1 | 0.4 | 0.9 | 0.81761 | 2174.5 | 16.1 | 2143.1 | 9.5  | 2113.1 | 10.8 | -2.9 |
| Spot 307 | 65  | 104053.3  | 1.5 | 7.3 | 0.7 | 7.6  | 1.0 | 0.4 | 0.7 | 0.71685 | 2201.2 | 13.0 | 2180.4 | 8.7  | 2161.0 | 11.9 | -1.9 |
| Spot 308 | 64  | 86004.0   | 2.8 | 7.5 | 0.6 | 7.3  | 1.0 | 0.4 | 0.8 | 0.81545 | 2182.2 | 15.0 | 2153.6 | 8.9  | 2126.5 | 10.1 | -2.6 |
| Spot 309 | 121 | 104976.5  | 0.5 | 8.3 | 0.5 | 5.9  | 0.9 | 0.4 | 0.8 | 0.84866 | 1976.0 | 13.5 | 1964.2 | 8.1  | 1951.8 | 8.8  | -1.2 |
| Spot 311 | 177 | 155657.8  | 1.6 | 6.3 | 0.8 | 9.5  | 1.2 | 0.4 | 0.8 | 0.69541 | 2343.4 | 16.1 | 2387.4 | 10.8 | 2425.1 | 14.4 | 3.4  |
| Spot 312 | 104 | 102313.9  | 2.3 | 5.4 | 0.5 | 13.2 | 1.0 | 0.5 | 0.8 | 0.84712 | 2729.7 | 18.3 | 2696.0 | 9.2  | 2670.8 | 8.5  | -2.2 |
| Spot 313 | 260 | 7467.0    | 3.1 | 7.1 | 1.1 | 6.2  | 1.8 | 0.3 | 1.4 | 0.78137 | 1834.1 | 21.8 | 2010.9 | 15.3 | 2197.7 | 19.0 | 16.5 |
| Spot 314 | 112 | 253871.5  | 3.7 | 7.6 | 0.7 | 6.9  | 1.1 | 0.4 | 0.9 | 0.78712 | 2076.8 | 15.4 | 2093.0 | 9.8  | 2109.0 | 12.0 | 1.5  |
| Spot 315 | 170 | 11436.0   | 1.4 | 6.5 | 0.8 | 7.5  | 1.2 | 0.4 | 1.0 | 0.77802 | 1983.3 | 16.6 | 2168.1 | 11.2 | 2347.9 | 13.4 | 15.5 |

**Run 3 (discordant)**

|          |      |          |      |     |     |     |     |     |     |         |        |      |        |      |        |      |      |
|----------|------|----------|------|-----|-----|-----|-----|-----|-----|---------|--------|------|--------|------|--------|------|------|
| Spot 124 | 746  | 4559.7   | 1.8  | 6.8 | 1.7 | 6.7 | 2.9 | 0.3 | 2.4 | 0.81320 | 1827.3 | 37.7 | 2067.2 | 25.7 | 2315.6 | 29.1 | 21.1 |
| Spot 14  | 117  | 150958.7 | 1.5  | 7.4 | 0.6 | 5.7 | 1.5 | 0.3 | 1.4 | 0.91572 | 1712.4 | 20.3 | 1924.3 | 12.7 | 2161.0 | 10.4 | 20.8 |
| Spot 156 | 227  | 6762.6   | 2.2  | 7.4 | 1.9 | 5.0 | 2.9 | 0.3 | 2.3 | 0.76618 | 1547.8 | 31.0 | 1827.2 | 24.9 | 2162.5 | 32.9 | 28.4 |
| Spot 161 | 1987 | 73211.9  | 10.6 | 9.3 | 0.6 | 3.5 | 1.0 | 0.2 | 0.8 | 0.79480 | 1351.0 | 9.3  | 1520.7 | 7.5  | 1765.7 | 10.6 | 23.5 |
| Spot 290 | 126  | 24243.5  | 1.0  | 8.2 | 0.8 | 4.6 | 2.5 | 0.3 | 2.4 | 0.95313 | 1552.8 | 33.3 | 1747.4 | 21.1 | 1988.9 | 13.6 | 21.9 |
| Spot 310 | 238  | 6646.9   | 1.6  | 7.3 | 0.7 | 5.7 | 1.3 | 0.3 | 1.1 | 0.82161 | 1700.2 | 16.1 | 1933.8 | 11.3 | 2194.3 | 13.0 | 22.5 |
| Spot 70  | 86   | 63627.2  | 1.7  | 8.6 | 0.6 | 5.8 | 1.1 | 0.4 | 0.9 | 0.85414 | 2001.8 | 15.7 | 1950.9 | 9.3  | 1897.3 | 10.0 | -5.5 |
