# Supplementary material for: Increased accuracy and precision in igneous and detrital zircon geochronology using CA-LA-ICPMS
Source: Copernicus journal article supplement (doi:10.5194/gchron-2023-20), 2023-08-25
Supplement: Supplementary file 30 [file gchron-2023-20-supplement.zip]

**TABLE S19: NM8A (CA) LA-ICPMS U-Pb ZIRCON GEOCHRONOLOGY**

| Composition |       |          |       |           |           |           |       |           |           | Ages      |           |           |           |       |        |       |
|-------------|-------|----------|-------|-----------|-----------|-----------|-------|-----------|-----------|-----------|-----------|-----------|-----------|-------|--------|-------|
| Zircon      | U     | 206Pb/   | U/Th  | 206Pb/ 1σ | 207Pb/ 1σ | 206Pb/ 1σ | Error | 206Pb/ 1σ | 207Pb/ 1σ | 206Pb/ 1σ | 207Pb/ 1σ | 206Pb/ 1σ | 207Pb/ 1σ | %     |        |       |
| #           | (ppm) | 204Pb    |       | 207Pb (%) | 235U (%)  | 238U (%)  | Corr. | 238U      | (Ma)      | 235U      | (Ma)      | 207Pb     | (Ma)      | Disc. |        |       |
| Run 1       |       |          |       |           |           |           |       |           |           |           |           |           |           |       |        |       |
| Spot 1      | 89    | 1366.9   | 1.7   | 23.6      | 4.0       | 0.2       | 5.4   | 0.0       | 3.6       | 0.6737943 | 192.1     | 6.9       | 165.0     | 8.2   | NA     | NA    |
| Spot 10     | 143   | 14651.5  | 1.9   | 19.3      | 3.6       | 0.2       | 6.9   | 0.0       | 5.9       | 0.8521062 | 210.3     | 12.1      | 216.3     | 13.4  | 281.7  | 82.4  |
| Spot 100    | 131   | 6282.3   | 2.8   | 12.7      | 2.1       | 2.2       | 2.4   | 0.2       | 1.3       | 0.5137164 | 1167.4    | 13.4      | 1165.9    | 17.0  | 1162.9 | 41.6  |
| Spot 101    | 265   | 18225.5  | 4.0   | 11.9      | 1.0       | 2.4       | 1.8   | 0.2       | 1.5       | 0.8391952 | 1227.6    | 16.9      | 1248.4    | 12.9  | 1284.5 | 19.1  |
| Spot 102    | 194   | 1143.2   | 3.0   | 29.0      | 6.7       | 0.0       | 7.5   | 0.0       | 3.4       | 0.4568288 | 56.8      | 1.9       | 41.8      | 3.1   | NA     | NA    |
| Spot 103    | 636   | 67225.5  | 2.5   | 14.1      | 1.0       | 1.4       | 2.9   | 0.1       | 2.7       | 0.9365422 | 871.8     | 22.1      | 895.5     | 17.2  | 954.4  | 20.7  |
| Spot 104    | 137   | 13185.7  | 1.2   | 20.2      | 2.7       | 0.3       | 3.8   | 0.0       | 2.6       | 0.6973488 | 304.8     | 7.8       | 289.9     | 9.5   | 171.2  | 63.1  |
| Spot 105    | 174   | 17214.8  | 2.4   | 12.8      | 1.5       | 2.2       | 2.1   | 0.2       | 1.4       | 0.6776112 | 1176.5    | 15.1      | 1169.3    | 14.4  | 1155.9 | 30.3  |
| Spot 108    | 395   | 8014.8   | 1.3   | 20.1      | 1.9       | 0.3       | 2.3   | 0.0       | 1.4       | 0.5915896 | 274.4     | 3.7       | 265.0     | 5.4   | 182.5  | 43.7  |
| Spot 113    | 389   | 61531.1  | 1.7   | 12.1      | 0.9       | 2.4       | 2.0   | 0.2       | 1.8       | 0.8913702 | 1246.0    | 20.3      | 1250.8    | 14.4  | 1259.1 | 17.8  |
| Spot 114    | 68    | 9859.2   | 2.3   | 18.2      | 4.0       | 0.3       | 4.5   | 0.0       | 2.1       | 0.4680306 | 228.9     | 4.8       | 245.4     | 9.8   | 405.5  | 89.4  |
| Spot 116    | 197   | 4344.4   | 2.1   | 19.5      | 2.9       | 0.3       | 4.2   | 0.0       | 3.1       | 0.732879  | 256.4     | 7.8       | 255.6     | 9.5   | 248.7  | 66.1  |
| Spot 118    | 364   | 29485.8  | 1.5   | 19.4      | 1.5       | 0.3       | 2.3   | 0.0       | 1.8       | 0.7730178 | 279.4     | 4.9       | 277.6     | 5.7   | 262.8  | 34.0  |
| Spot 12     | 659   | 339857.5 | 39.5  | 14.8      | 3.1       | 0.9       | 3.5   | 0.1       | 1.6       | 0.4684793 | 614.2     | 9.6       | 669.6     | 17.2  | 860.9  | 64.2  |
| Spot 120    | 101   | 18568.0  | 1.3   | 14.7      | 7.1       | 0.3       | 9.2   | 0.0       | 5.8       | 0.6297216 | 170.5     | 9.7       | 228.2     | 18.8  | 874.7  | 148.2 |
| Spot 121    | 87    | 651.5    | 1.5   | 20.6      | 25.0      | 0.2       | 25.2  | 0.0       | 3.6       | 0.1417415 | 190.8     | 6.7       | 186.2     | 42.9  | 128.3  | NA    |
| Spot 122    | 634   | 27434.6  | 7.5   | 12.3      | 0.7       | 2.3       | 1.5   | 0.2       | 1.3       | 0.8770754 | 1211.3    | 14.5      | 1219.9    | 10.6  | 1235.3 | 14.1  |
| Spot 123    | 543   | 44967.1  | 1.5   | 19.9      | 2.6       | 0.1       | 3.2   | 0.0       | 1.8       | 0.5596839 | 61.0      | 1.1       | 64.8      | 2.0   | 207.9  | 61.3  |
| Spot 124    | 493   | 8498.2   | 4.9   | 19.8      | 1.4       | 0.3       | 1.9   | 0.0       | 1.3       | 0.6954399 | 245.9     | 3.2       | 243.1     | 4.1   | 215.9  | 31.3  |
| Spot 125    | 382   | 3963.2   | 3.4   | 21.2      | 1.9       | 0.1       | 2.6   | 0.0       | 1.8       | 0.6704559 | 146.5     | 2.5       | 141.5     | 3.5   | 57.6   | 46.3  |
| Spot 126    | 521   | 35456.6  | 3.2   | 19.6      | 1.5       | 0.3       | 2.3   | 0.0       | 1.8       | 0.7726921 | 243.1     | 4.3       | 243.0     | 5.1   | 241.7  | 34.4  |
| Spot 128    | 370   | 9759.0   | 3.7   | 20.5      | 3.3       | 0.2       | 6.4   | 0.0       | 5.4       | 0.8523262 | 192.0     | 10.3      | 187.5     | 10.9  | 131.5  | 78.6  |
| Spot 129    | 113   | 7664.9   | 4.6   | 13.0      | 1.1       | 1.9       | 2.3   | 0.2       | 2.0       | 0.8709683 | 1081.9    | 19.7      | 1094.7    | 15.2  | 1120.3 | 22.3  |
| Spot 13     | 316   | 35493.2  | 6.0   | 19.0      | 2.5       | 0.3       | 3.8   | 0.0       | 3.0       | 0.7699817 | 242.2     | 7.0       | 248.4     | 8.5   | 306.7  | 55.9  |
| Spot 130    | 271   | 6861.2   | 1.8   | 20.4      | 1.7       | 0.3       | 2.5   | 0.0       | 1.9       | 0.7538698 | 275.7     | 5.2       | 262.4     | 5.9   | 146.0  | 39.1  |
| Spot 131    | 336   | 23251.5  | 193.9 | 16.3      | 1.9       | 0.7       | 4.3   | 0.1       | 3.9       | 0.9005616 | 496.6     | 18.5      | 524.2     | 17.6  | 646.4  | 40.1  |
| Spot 132    | 197   | 26832.4  | 1.7   | 14.2      | 1.0       | 1.4       | 1.8   | 0.1       | 1.5       | 0.821668  | 894.9     | 12.4      | 906.0     | 10.8  | 933.3  | 21.1  |
| Spot 133    | 293   | 10796.0  | 3.5   | 13.1      | 0.7       | 1.9       | 3.3   | 0.2       | 3.3       | 0.975334  | 1053.9    | 31.6      | 1072.3    | 22.1  | 1110.0 | 14.7  |
| Spot 134    | 201   | 36080.1  | 1.7   | 11.6      | 1.0       | 2.7       | 1.9   | 0.2       | 1.7       | 0.8619635 | 1306.8    | 19.6      | 1318.7    | 14.2  | 1337.9 | 18.8  |
| Spot 135    | 229   | 13791.8  | 2.9   | 12.3      | 1.2       | 2.3       | 1.6   | 0.2       | 1.1       | 0.6759719 | 1227.1    | 12.3      | 1227.5    | 11.6  | 1228.4 | 23.5  |
| Spot 136    | 285   | 30055.0  | 4.9   | 13.9      | 1.0       | 1.6       | 2.2   | 0.2       | 2.0       | 0.9005995 | 967.8     | 17.9      | 973.2     | 13.8  | 985.5  | 19.5  |
| Spot 137    | 127   | 14313.4  | 2.5   | 13.6      | 2.5       | 1.4       | 3.8   | 0.1       | 2.9       | 0.7639931 | 846.1     | 23.1      | 899.7     | 22.8  | 1033.8 | 49.8  |
| Spot 138    | 454   | 9099.0   | 1.2   | 19.5      | 1.2       | 0.3       | 1.8   | 0.0       | 1.4       | 0.7368186 | 273.6     | 3.6       | 271.4     | 4.4   | 252.7  | 28.7  |
| Spot 139    | 58    | 970.6    | 1.3   | 29.1      | 15.2      | 0.2       | 16.1  | 0.0       | 5.3       | 0.3300656 | 203.5     | 10.6      | 143.5     | 21.6  | NA     | NA    |
| Spot 140    | 165   | 6950.3   | 5.6   | 15.3      | 2.7       | 1.0       | 3.6   | 0.1       | 2.4       | 0.674998  | 700.0     | 16.1      | 720.5     | 18.6  | 784.6  | 55.9  |
| Spot 141    | 345   | 39748.3  | 4.0   | 10.6      | 0.9       | 3.5       | 1.6   | 0.3       | 1.4       | 0.8343084 | 1529.1    | 18.5      | 1525.4    | 12.8  | 1520.1 | 16.9  |
| Spot 142    | 668   | 71091.1  | 0.7   | 20.5      | 1.3       | 0.2       | 1.8   | 0.0       | 1.2       | 0.6791409 | 171.4     | 2.0       | 169.0     | 2.7   | 134.5  | 30.2  |
| Spot 143    | 251   | 7066.4   | 4.2   | 12.5      | 1.6       | 2.3       | 2.3   | 0.2       | 1.6       | 0.7171186 | 1204.3    | 18.1      | 1199.5    | 16.2  | 1190.8 | 31.6  |

|          |      |          |      |      |      |     |      |     |     |           |        |      |        |      |        |       |        |
|----------|------|----------|------|------|------|-----|------|-----|-----|-----------|--------|------|--------|------|--------|-------|--------|
| Spot 144 | 328  | 31743.8  | 3.1  | 13.5 | 1.0  | 1.8 | 1.7  | 0.2 | 1.3 | 0.8038831 | 1019.4 | 12.5 | 1027.8 | 10.7 | 1045.5 | 19.9  | 2.5    |
| Spot 145 | 215  | 14939.9  | 2.5  | 12.8 | 0.9  | 2.0 | 1.5  | 0.2 | 1.2 | 0.8218622 | 1088.6 | 12.3 | 1110.6 | 10.1 | 1153.8 | 16.9  | 5.6    |
| Spot 146 | 78   | 3581.1   | 3.0  | 14.7 | 3.8  | 1.2 | 7.1  | 0.1 | 6.0 | 0.8444627 | 757.2  | 42.7 | 784.9  | 38.7 | 864.2  | 78.6  | 12.4   |
| Spot 147 | 361  | 6490.4   | 9.7  | 20.3 | 1.5  | 0.3 | 1.9  | 0.0 | 1.2 | 0.6240334 | 239.1  | 2.7  | 232.3  | 3.9  | 164.5  | 33.9  | -45.4  |
| Spot 148 | 109  | 6770.0   | 2.6  | 20.1 | 2.7  | 0.3 | 3.4  | 0.0 | 2.1 | 0.6213561 | 247.0  | 5.1  | 241.3  | 7.3  | 186.5  | 61.8  | -32.4  |
| Spot 15  | 213  | 26587.7  | 3.0  | 12.7 | 1.0  | 2.1 | 2.0  | 0.2 | 1.7 | 0.8757939 | 1156.5 | 18.4 | 1161.3 | 13.7 | 1170.4 | 19.0  | 1.2    |
| Spot 150 | 561  | 38684.5  | 1.4  | 19.9 | 2.3  | 0.2 | 3.0  | 0.0 | 1.9 | 0.6428239 | 171.6  | 3.3  | 173.9  | 4.8  | 205.1  | 53.2  | 16.4   |
| Spot 153 | 299  | 35513.5  | 2.6  | 12.7 | 0.8  | 2.2 | 1.4  | 0.2 | 1.2 | 0.8246656 | 1183.2 | 12.6 | 1175.3 | 9.9  | 1160.9 | 15.9  | -1.9   |
| Spot 156 | 180  | 16998.4  | 3.0  | 12.9 | 1.1  | 2.0 | 2.0  | 0.2 | 1.6 | 0.8140849 | 1085.5 | 16.0 | 1102.3 | 13.3 | 1135.8 | 22.8  | 4.4    |
| Spot 157 | 222  | 6597.2   | 15.7 | 15.3 | 1.2  | 1.1 | 2.0  | 0.1 | 1.6 | 0.7998159 | 740.0  | 11.3 | 751.2  | 10.8 | 784.8  | 25.6  | 5.7    |
| Spot 158 | 206  | 9031.3   | 3.9  | 14.2 | 1.2  | 1.4 | 1.9  | 0.1 | 1.5 | 0.7798786 | 889.1  | 12.6 | 903.4  | 11.7 | 938.4  | 25.0  | 5.2    |
| Spot 159 | 198  | 16808.3  | 1.9  | 14.0 | 1.7  | 1.4 | 2.0  | 0.1 | 1.0 | 0.518724  | 878.2  | 8.6  | 903.0  | 12.0 | 964.0  | 35.1  | 8.9    |
| Spot 16  | 29   | 2081.6   | 1.7  | 12.2 | 5.5  | 2.0 | 6.8  | 0.2 | 3.9 | 0.5805813 | 1062.0 | 38.6 | 1121.6 | 46.1 | 1238.9 | 108.4 | 14.3   |
| Spot 160 | 300  | 15672.3  | 2.9  | 12.9 | 0.7  | 2.1 | 1.2  | 0.2 | 0.9 | 0.7890422 | 1138.1 | 9.7  | 1135.4 | 8.1  | 1130.2 | 14.4  | -0.7   |
| Spot 161 | 294  | 173801.2 | 3.9  | 12.5 | 0.8  | 2.3 | 1.9  | 0.2 | 1.7 | 0.9054171 | 1204.9 | 19.0 | 1203.9 | 13.5 | 1201.9 | 16.0  | -0.3   |
| Spot 162 | 476  | 71155.7  | 1.3  | 18.9 | 1.5  | 0.3 | 2.7  | 0.0 | 2.2 | 0.8218453 | 262.7  | 5.7  | 269.4  | 6.4  | 328.2  | 34.8  | 20.0   |
| Spot 164 | 213  | 24568.2  | 1.8  | 13.1 | 1.0  | 1.9 | 1.4  | 0.2 | 1.0 | 0.6796886 | 1066.4 | 9.4  | 1077.0 | 9.3  | 1098.4 | 20.6  | 2.9    |
| Spot 165 | 812  | 17092.8  | 2.0  | 20.5 | 1.4  | 0.2 | 2.1  | 0.0 | 1.6 | 0.7591759 | 166.0  | 2.7  | 164.1  | 3.2  | 136.2  | 32.7  | -21.9  |
| Spot 167 | 870  | 26531.1  | 1.2  | 19.2 | 1.4  | 0.3 | 1.9  | 0.0 | 1.3 | 0.6776723 | 281.0  | 3.6  | 281.8  | 4.7  | 288.5  | 32.0  | 2.6    |
| Spot 168 | 638  | 6826.8   | 1.0  | 19.7 | 1.7  | 0.3 | 2.9  | 0.0 | 2.3 | 0.8011866 | 282.0  | 6.5  | 275.8  | 7.1  | 223.6  | 40.5  | -26.1  |
| Spot 169 | 328  | 2565.6   | 1.5  | 22.0 | 2.5  | 0.3 | 2.9  | 0.0 | 1.4 | 0.4946789 | 290.7  | 4.0  | 258.2  | 6.5  | NA     | NA    |        |
| Spot 17  | 390  | 428800.1 | 3.2  | 12.5 | 1.3  | 2.2 | 3.1  | 0.2 | 2.8 | 0.9098996 | 1159.4 | 29.5 | 1171.7 | 21.2 | 1194.5 | 25.0  | 2.9    |
| Spot 170 | 639  | 13443.8  | 1.2  | 19.6 | 1.6  | 0.3 | 2.4  | 0.0 | 1.8 | 0.7437313 | 281.0  | 4.9  | 276.3  | 5.8  | 237.0  | 37.1  | -18.6  |
| Spot 172 | 453  | 30490.3  | 3.6  | 12.4 | 1.0  | 2.2 | 1.9  | 0.2 | 1.6 | 0.8384468 | 1175.4 | 16.9 | 1189.9 | 13.1 | 1216.4 | 20.1  | 3.4    |
| Spot 173 | 289  | 11371.6  | 2.3  | 12.8 | 0.9  | 2.2 | 1.9  | 0.2 | 1.7 | 0.8825285 | 1195.7 | 18.6 | 1179.8 | 13.4 | 1150.7 | 18.0  | -3.9   |
| Spot 174 | 275  | 194742.4 | 1.6  | 13.4 | 1.0  | 1.8 | 1.6  | 0.2 | 1.3 | 0.8042949 | 1033.3 | 12.3 | 1041.6 | 10.5 | 1058.9 | 19.2  | 2.4    |
| Spot 176 | 266  | 3955.8   | 1.5  | 18.5 | 1.2  | 0.6 | 2.1  | 0.1 | 1.7 | 0.8169964 | 485.1  | 7.9  | 465.9  | 7.7  | 372.3  | 26.9  | -30.3  |
| Spot 177 | 1064 | 32069.7  | 4.6  | 19.7 | 1.3  | 0.3 | 1.9  | 0.0 | 1.4 | 0.7453273 | 234.0  | 3.3  | 233.1  | 4.0  | 223.7  | 29.8  | -4.6   |
| Spot 179 | 128  | 1389.0   | 1.6  | 24.3 | 3.4  | 0.2 | 4.2  | 0.0 | 2.5 | 0.5938901 | 198.4  | 4.9  | 165.9  | 6.4  | NA     | NA    |        |
| Spot 180 | 719  | 26145.8  | 1.5  | 19.3 | 1.5  | 0.3 | 2.2  | 0.0 | 1.5 | 0.7052508 | 282.0  | 4.2  | 281.6  | 5.3  | 278.1  | 35.2  | -1.4   |
| Spot 181 | 117  | 1158.3   | 1.1  | 27.1 | 11.6 | 0.2 | 12.1 | 0.0 | 3.4 | 0.2808338 | 197.0  | 6.6  | 148.7  | 16.7 | NA     | NA    |        |
| Spot 182 | 308  | 877.2    | 2.8  | 18.9 | 4.8  | 0.1 | 5.5  | 0.0 | 2.7 | 0.4904746 | 74.5   | 2.0  | 82.6   | 4.4  | 321.7  | 109.0 | 76.8   |
| Spot 183 | 695  | 189779.9 | 2.4  | 11.2 | 0.8  | 2.9 | 1.6  | 0.2 | 1.4 | 0.8582781 | 1378.3 | 16.9 | 1390.5 | 12.0 | 1409.3 | 15.6  | 2.2    |
| Spot 184 | 111  | 3836.2   | 4.8  | 12.1 | 1.2  | 2.1 | 4.8  | 0.2 | 4.6 | 0.969165  | 1075.4 | 45.8 | 1137.6 | 32.6 | 1258.4 | 22.9  | 14.5   |
| Spot 185 | 295  | 23619.8  | 1.7  | 15.1 | 1.5  | 1.2 | 1.9  | 0.1 | 1.2 | 0.6141254 | 790.9  | 8.8  | 796.2  | 10.6 | 811.0  | 31.8  | 2.5    |
| Spot 186 | 193  | 25621.9  | 3.2  | 12.4 | 1.1  | 2.2 | 1.8  | 0.2 | 1.4 | 0.7694909 | 1163.4 | 14.5 | 1182.5 | 12.4 | 1217.5 | 22.3  | 4.4    |
| Spot 187 | 202  | 8755.9   | 3.5  | 14.0 | 1.2  | 1.6 | 1.7  | 0.2 | 1.2 | 0.7273151 | 972.1  | 11.0 | 971.5  | 10.5 | 970.0  | 23.5  | -0.2   |
| Spot 188 | 196  | 2424.2   | 1.7  | 22.1 | 2.7  | 0.3 | 3.1  | 0.0 | 1.5 | 0.4723381 | 277.0  | 4.0  | 245.7  | 6.8  | NA     | NA    |        |
| Spot 189 | 751  | 5673.5   | 3.3  | 20.1 | 1.3  | 0.2 | 1.6  | 0.0 | 1.1 | 0.6486337 | 225.3  | 2.4  | 221.4  | 3.3  | 180.7  | 29.1  | -24.7  |
| Spot 19  | 463  | 11237.7  | 1.2  | 19.1 | 1.9  | 0.3 | 3.1  | 0.0 | 2.4 | 0.7814481 | 276.0  | 6.5  | 278.8  | 7.5  | 302.8  | 43.6  | 8.9    |
| Spot 190 | 278  | 8863.1   | 1.2  | 19.5 | 4.3  | 0.1 | 4.6  | 0.0 | 1.7 | 0.3774173 | 57.4   | 1.0  | 62.2   | 2.8  | 251.5  | 98.3  | 77.2   |
| Spot 191 | 305  | 2989.5   | 16.7 | 21.7 | 2.1  | 0.2 | 2.8  | 0.0 | 1.9 | 0.6711452 | 236.6  | 4.4  | 216.4  | 5.5  | 1.4    | NA    | #####  |
| Spot 192 | 246  | 2693.4   | 2.4  | 21.0 | 2.4  | 0.3 | 3.1  | 0.0 | 2.0 | 0.6456296 | 270.3  | 5.3  | 251.1  | 7.0  | 75.2   | 56.8  | -259.2 |

|          |      |          |      |      |      |     |      |     |     |           |        |      |        |      |        |       |        |
|----------|------|----------|------|------|------|-----|------|-----|-----|-----------|--------|------|--------|------|--------|-------|--------|
| Spot 193 | 271  | 1531.5   | 1.9  | 20.2 | 11.6 | 0.1 | 11.9 | 0.0 | 2.7 | 0.2239134 | 68.9   | 1.8  | 71.9   | 8.3  | 171.9  | NA    | 59.9   |
| Spot 194 | 771  | 34891.5  | 11.3 | 12.1 | 1.1  | 2.0 | 2.0  | 0.2 | 1.6 | 0.8208796 | 1034.4 | 15.7 | 1106.9 | 13.5 | 1252.5 | 22.4  | 17.4   |
| Spot 195 | 684  | 12118.5  | 1.2  | 20.3 | 1.7  | 0.2 | 2.4  | 0.0 | 1.7 | 0.7012034 | 226.9  | 3.7  | 220.9  | 4.7  | 157.8  | 39.6  | -43.8  |
| Spot 196 | 647  | 47743.4  | 1.3  | 18.7 | 2.2  | 0.3 | 3.3  | 0.0 | 2.5 | 0.7421937 | 272.9  | 6.6  | 280.7  | 8.1  | 346.2  | 50.3  | 21.2   |
| Spot 197 | 204  | 540782.4 | 2.0  | 13.3 | 1.2  | 1.8 | 2.0  | 0.2 | 1.6 | 0.8090962 | 1012.4 | 15.1 | 1030.0 | 12.9 | 1067.7 | 23.6  | 5.2    |
| Spot 198 | 232  | 33057.8  | 2.0  | 17.7 | 1.9  | 0.3 | 2.2  | 0.0 | 1.2 | 0.5306615 | 274.3  | 3.2  | 295.5  | 5.7  | 467.0  | 41.6  | 41.3   |
| Spot 20  | 674  | 14269.3  | 10.7 | 19.1 | 1.9  | 0.3 | 2.6  | 0.0 | 1.8 | 0.6936717 | 252.4  | 4.4  | 256.9  | 5.9  | 298.6  | 42.4  | 15.5   |
| Spot 200 | 383  | 8616.4   | 2.3  | 17.5 | 3.6  | 0.3 | 4.0  | 0.0 | 1.7 | 0.4224318 | 271.6  | 4.5  | 295.9  | 10.2 | 492.9  | 79.5  | 44.9   |
| Spot 201 | 240  | 12322.2  | 1.1  | 12.9 | 0.8  | 2.0 | 1.4  | 0.2 | 1.1 | 0.8124001 | 1126.3 | 11.5 | 1126.8 | 9.3  | 1127.8 | 15.9  | 0.1    |
| Spot 202 | 253  | 14249.7  | 2.4  | 13.1 | 1.1  | 1.7 | 1.7  | 0.2 | 1.3 | 0.7830902 | 979.9  | 12.1 | 1017.9 | 10.9 | 1100.5 | 21.1  | 11.0   |
| Spot 203 | 98   | 5768.9   | 1.9  | 14.5 | 2.3  | 1.4 | 2.5  | 0.1 | 1.1 | 0.4268764 | 873.9  | 8.8  | 880.6  | 14.8 | 897.4  | 47.0  | 2.6    |
| Spot 205 | 78   | 404109.1 | 5.8  | 11.9 | 1.9  | 2.2 | 3.7  | 0.2 | 3.2 | 0.8642334 | 1143.1 | 33.3 | 1195.3 | 25.9 | 1290.8 | 36.0  | 11.4   |
| Spot 206 | 116  | 22106.4  | 2.6  | 13.6 | 1.1  | 1.6 | 1.5  | 0.2 | 1.1 | 0.6965653 | 925.2  | 9.1  | 958.2  | 9.4  | 1034.6 | 22.0  | 10.6   |
| Spot 207 | 179  | 1940.7   | 1.2  | 20.9 | 2.6  | 0.3 | 2.9  | 0.0 | 1.3 | 0.4450693 | 272.9  | 3.4  | 255.0  | 6.5  | 92.9   | 60.9  | -193.8 |
| Spot 209 | 520  | 74302.2  | 4.2  | 11.5 | 0.9  | 2.7 | 1.7  | 0.2 | 1.4 | 0.8416187 | 1324.8 | 17.3 | 1336.1 | 12.8 | 1354.3 | 17.9  | 2.2    |
| Spot 21  | 747  | 20351.7  | 0.8  | 21.4 | 1.2  | 0.2 | 2.1  | 0.0 | 1.6 | 0.7977844 | 191.7  | 3.1  | 180.5  | 3.4  | 35.6   | 29.8  | -437.8 |
| Spot 210 | 571  | 9439.6   | 10.6 | 19.4 | 1.2  | 0.3 | 1.7  | 0.0 | 1.2 | 0.7246843 | 279.5  | 3.4  | 277.7  | 4.1  | 262.7  | 27.0  | -6.4   |
| Spot 211 | 85   | 33694.5  | 3.8  | 14.1 | 1.4  | 1.5 | 1.8  | 0.1 | 1.2 | 0.6378264 | 900.2  | 9.8  | 915.6  | 11.1 | 952.8  | 28.9  | 5.5    |
| Spot 212 | 463  | 5649.0   | 1.7  | 20.3 | 1.5  | 0.3 | 2.2  | 0.0 | 1.6 | 0.7141867 | 287.0  | 4.4  | 273.3  | 5.3  | 157.7  | 36.0  | -82.0  |
| Spot 214 | 164  | 5883.2   | 4.6  | 14.6 | 1.2  | 1.4 | 1.7  | 0.1 | 1.3 | 0.7204351 | 898.7  | 10.5 | 895.0  | 10.3 | 885.8  | 24.9  | -1.5   |
| Spot 215 | 165  | 2134.5   | 2.5  | 20.5 | 4.4  | 0.2 | 5.3  | 0.0 | 3.0 | 0.568173  | 179.9  | 5.3  | 177.2  | 8.6  | 140.6  | 102.5 | -28.0  |
| Spot 217 | 136  | 1461.1   | 5.6  | 23.6 | 8.7  | 0.1 | 9.5  | 0.0 | 3.7 | 0.3928203 | 100.5  | 3.7  | 89.0   | 8.1  | NA     | NA    |        |
| Spot 218 | 1092 | 106077.9 | 27.7 | 12.4 | 0.9  | 2.2 | 1.7  | 0.2 | 1.4 | 0.8468915 | 1173.0 | 15.4 | 1187.5 | 11.9 | 1214.1 | 17.8  | 3.4    |
| Spot 22  | 94   | 30066.0  | 1.1  | 11.1 | 2.1  | 3.1 | 3.6  | 0.2 | 3.0 | 0.8211351 | 1435.4 | 38.5 | 1434.2 | 28.0 | 1432.3 | 39.6  | -0.2   |
| Spot 221 | 55   | 876.6    | 2.4  | 21.1 | 9.2  | 0.3 | 10.3 | 0.0 | 4.6 | 0.4509762 | 251.9  | 11.4 | 234.7  | 21.5 | 66.5   | NA    | -278.8 |
| Spot 222 | 843  | 22464.0  | 2.1  | 18.9 | 1.0  | 0.3 | 1.6  | 0.0 | 1.2 | 0.7686923 | 283.6  | 3.4  | 287.4  | 3.9  | 318.7  | 22.9  | 11.0   |
| Spot 223 | 455  | 58690.0  | 3.6  | 9.7  | 0.9  | 4.2 | 1.7  | 0.3 | 1.4 | 0.820411  | 1649.7 | 19.7 | 1666.8 | 13.5 | 1688.5 | 17.4  | 2.3    |
| Spot 224 | 1295 | 159471.7 | 1.1  | 19.2 | 0.9  | 0.3 | 1.7  | 0.0 | 1.4 | 0.8378552 | 290.5  | 4.0  | 289.7  | 4.2  | 283.4  | 20.9  | -2.5   |
| Spot 225 | 69   | 3818.1   | 3.7  | 13.7 | 1.8  | 1.8 | 2.6  | 0.2 | 1.9 | 0.7233    | 1054.3 | 18.1 | 1041.0 | 16.7 | 1013.2 | 36.0  | -4.1   |
| Spot 226 | 240  | 2462.8   | 2.8  | 22.5 | 2.3  | 0.2 | 3.8  | 0.0 | 3.0 | 0.7887867 | 162.0  | 4.8  | 146.8  | 5.2  | NA     | NA    |        |
| Spot 227 | 154  | 27982.4  | 2.6  | 20.5 | 1.9  | 0.4 | 3.2  | 0.1 | 2.5 | 0.7936519 | 361.4  | 8.8  | 333.2  | 9.0  | 140.9  | 45.3  | -156.6 |
| Spot 228 | 281  | 54746.3  | 2.3  | 12.6 | 1.1  | 2.1 | 1.6  | 0.2 | 1.2 | 0.7591505 | 1149.3 | 13.1 | 1162.5 | 11.4 | 1187.1 | 21.1  | 3.2    |
| Spot 229 | 182  | 24393.5  | 2.1  | 11.3 | 1.1  | 2.9 | 2.3  | 0.2 | 2.0 | 0.8659778 | 1357.2 | 23.9 | 1369.2 | 17.0 | 1388.1 | 21.7  | 2.2    |
| Spot 231 | 606  | 30421.4  | 3.1  | 10.7 | 0.7  | 3.1 | 1.2  | 0.2 | 1.0 | 0.8273956 | 1382.6 | 11.9 | 1425.5 | 8.9  | 1490.0 | 12.3  | 7.2    |
| Spot 232 | 200  | 9876.1   | 1.6  | 12.5 | 1.5  | 2.0 | 3.1  | 0.2 | 2.7 | 0.8697172 | 1081.0 | 26.9 | 1121.8 | 21.1 | 1201.7 | 30.3  | 10.0   |
| Spot 234 | 425  | 8367.4   | 1.7  | 19.7 | 1.7  | 0.3 | 2.6  | 0.0 | 2.0 | 0.7616329 | 274.4  | 5.4  | 270.1  | 6.3  | 232.9  | 39.5  | -17.8  |
| Spot 235 | 257  | 32305.3  | 1.6  | 13.7 | 1.2  | 1.8 | 2.0  | 0.2 | 1.7 | 0.8230527 | 1042.9 | 16.1 | 1035.5 | 13.2 | 1019.8 | 23.4  | -2.3   |
| Spot 236 | 173  | 67443.4  | 4.8  | 13.7 | 1.2  | 1.6 | 2.6  | 0.2 | 2.3 | 0.8835009 | 927.2  | 20.0 | 952.3  | 16.2 | 1010.9 | 24.9  | 8.3    |
| Spot 237 | 147  | 48028.4  | 1.9  | 16.0 | 3.1  | 0.7 | 3.4  | 0.1 | 1.4 | 0.4085068 | 483.0  | 6.4  | 519.6  | 13.8 | 683.9  | 66.0  | 29.4   |
| Spot 238 | 257  | 6485.8   | 2.0  | 17.1 | 1.0  | 0.7 | 2.4  | 0.1 | 2.1 | 0.9067628 | 566.1  | 11.6 | 562.5  | 10.2 | 547.8  | 21.7  | -3.3   |
| Spot 239 | 448  | 122093.4 | 1.3  | 19.3 | 1.1  | 0.3 | 1.9  | 0.0 | 1.6 | 0.8213586 | 225.6  | 3.5  | 230.2  | 4.0  | 277.7  | 25.1  | 18.8   |
| Spot 24  | 155  | 6800.0   | 2.8  | 13.0 | 1.2  | 2.0 | 2.3  | 0.2 | 2.0 | 0.8601445 | 1103.8 | 20.1 | 1107.6 | 15.6 | 1115.1 | 23.5  | 1.0    |
| Spot 240 | 344  | 49729.5  | 5.7  | 12.9 | 1.1  | 2.1 | 1.5  | 0.2 | 1.0 | 0.7017595 | 1133.7 | 10.8 | 1133.2 | 10.1 | 1132.0 | 20.9  | -0.1   |

|          |      |          |      |      |     |     |     |     |     |           |        |      |        |      |        |       |        |
|----------|------|----------|------|------|-----|-----|-----|-----|-----|-----------|--------|------|--------|------|--------|-------|--------|
| Spot 242 | 166  | 9564.8   | 3.3  | 13.4 | 1.5 | 1.6 | 3.9 | 0.2 | 3.6 | 0.9248601 | 915.9  | 30.9 | 960.0  | 24.3 | 1062.5 | 29.9  | 13.8   |
| Spot 243 | 814  | 3223.2   | 3.4  | 21.6 | 3.9 | 0.1 | 4.2 | 0.0 | 1.7 | 0.4015656 | 68.1   | 1.2  | 66.5   | 2.7  | 7.1    | NA    | -855.5 |
| Spot 244 | 432  | 8046.3   | 1.2  | 20.4 | 2.1 | 0.2 | 2.4 | 0.0 | 1.2 | 0.4970963 | 180.4  | 2.1  | 178.5  | 3.9  | 152.6  | 48.9  | -18.3  |
| Spot 245 | 260  | 96226.6  | 1.6  | 11.1 | 1.3 | 2.9 | 2.2 | 0.2 | 1.7 | 0.788887  | 1362.4 | 21.1 | 1385.1 | 16.5 | 1420.2 | 25.6  | 4.1    |
| Spot 246 | 630  | 33476.0  | 1.5  | 19.1 | 1.0 | 0.3 | 1.5 | 0.0 | 1.1 | 0.7237105 | 284.7  | 3.1  | 285.9  | 3.8  | 295.2  | 23.9  | 3.5    |
| Spot 247 | 158  | 2334.5   | 2.4  | 19.5 | 3.7 | 0.3 | 4.1 | 0.0 | 1.6 | 0.3934404 | 266.7  | 4.2  | 264.8  | 9.5  | 247.6  | 85.9  | -7.7   |
| Spot 248 | 1113 | 44417.8  | 12.3 | 13.4 | 0.8 | 1.7 | 1.4 | 0.2 | 1.2 | 0.8084245 | 1004.0 | 10.7 | 1020.6 | 9.2  | 1056.5 | 16.9  | 5.0    |
| Spot 249 | 530  | 46523.6  | 1.1  | 19.6 | 2.0 | 0.2 | 2.6 | 0.0 | 1.8 | 0.6618393 | 165.6  | 2.9  | 170.3  | 4.1  | 235.8  | 45.8  | 29.8   |
| Spot 25  | 315  | 5060.3   | 2.3  | 19.2 | 1.7 | 0.5 | 2.2 | 0.1 | 1.3 | 0.6077101 | 454.3  | 5.8  | 427.1  | 7.5  | 283.3  | 39.3  | -60.4  |
| Spot 250 | 736  | 1884.1   | 4.3  | 22.7 | 3.5 | 0.1 | 4.1 | 0.0 | 2.1 | 0.5256768 | 71.3   | 1.5  | 66.4   | 2.6  | NA     | NA    |        |
| Spot 251 | 263  | 18860.2  | 3.6  | 16.3 | 2.1 | 0.8 | 2.6 | 0.1 | 1.6 | 0.6059705 | 614.0  | 9.2  | 622.3  | 12.1 | 652.6  | 44.4  | 5.9    |
| Spot 252 | 562  | 29588.9  | 4.1  | 13.9 | 0.9 | 1.4 | 1.7 | 0.1 | 1.5 | 0.8403881 | 866.0  | 11.9 | 901.5  | 10.4 | 989.7  | 19.2  | 12.5   |
| Spot 253 | 103  | 2980.8   | 1.6  | 20.2 | 4.6 | 0.2 | 5.4 | 0.0 | 2.7 | 0.508702  | 200.9  | 5.4  | 198.2  | 9.7  | 165.5  | 108.6 | -21.4  |
| Spot 254 | 160  | 22574.4  | 2.5  | 14.3 | 1.1 | 1.5 | 1.7 | 0.2 | 1.3 | 0.7573445 | 904.1  | 11.1 | 911.9  | 10.5 | 930.8  | 23.4  | 2.9    |
| Spot 255 | 237  | 3357.3   | 0.9  | 20.3 | 1.8 | 0.3 | 2.5 | 0.0 | 1.7 | 0.6806065 | 285.6  | 4.8  | 272.4  | 6.0  | 160.1  | 42.8  | -78.5  |
| Spot 256 | 757  | 24806.7  | 1.8  | 13.9 | 0.9 | 1.5 | 1.8 | 0.2 | 1.6 | 0.8746562 | 910.6  | 13.2 | 931.3  | 10.9 | 980.9  | 17.6  | 7.2    |
| Spot 257 | 158  | 794.4    | 3.6  | 34.6 | 2.5 | 0.2 | 3.1 | 0.0 | 1.8 | 0.5938545 | 277.8  | 5.0  | 164.1  | 4.7  | NA     | NA    |        |
| Spot 259 | 412  | 89897.1  | 2.0  | 16.3 | 1.0 | 0.9 | 1.8 | 0.1 | 1.5 | 0.8419823 | 639.0  | 9.2  | 641.6  | 8.5  | 650.6  | 20.8  | 1.8    |
| Spot 26  | 305  | 18327.8  | 4.0  | 12.7 | 1.0 | 2.2 | 1.6 | 0.2 | 1.2 | 0.7879889 | 1206.0 | 13.5 | 1189.2 | 10.9 | 1158.9 | 19.0  | -4.1   |
| Spot 260 | 266  | 31060.7  | 1.4  | 14.3 | 1.2 | 1.5 | 1.9 | 0.2 | 1.4 | 0.7479882 | 906.4  | 11.8 | 912.5  | 11.2 | 927.6  | 25.4  | 2.3    |
| Spot 262 | 394  | 197301.9 | 3.2  | 10.7 | 0.7 | 3.4 | 1.6 | 0.3 | 1.4 | 0.8886382 | 1494.5 | 19.1 | 1497.0 | 12.6 | 1500.6 | 14.0  | 0.4    |
| Spot 263 | 295  | 19997.0  | 1.7  | 14.4 | 1.2 | 1.5 | 2.1 | 0.2 | 1.7 | 0.8275565 | 928.0  | 14.9 | 924.3  | 12.7 | 915.7  | 24.2  | -1.3   |
| Spot 265 | 259  | 7373.6   | 3.8  | 14.4 | 1.5 | 1.4 | 2.1 | 0.1 | 1.5 | 0.6940429 | 882.4  | 12.1 | 891.8  | 12.6 | 915.0  | 31.4  | 3.6    |
| Spot 266 | 584  | 22826.2  | 1.2  | 19.6 | 1.1 | 0.3 | 1.7 | 0.0 | 1.4 | 0.7895133 | 265.6  | 3.6  | 263.6  | 4.0  | 245.8  | 24.4  | -8.1   |
| Spot 267 | 342  | 21837.1  | 1.7  | 19.1 | 1.4 | 0.3 | 1.9 | 0.0 | 1.3 | 0.6764066 | 263.3  | 3.2  | 267.3  | 4.4  | 302.6  | 31.1  | 13.0   |
| Spot 268 | 417  | 16416.9  | 1.6  | 19.9 | 1.6 | 0.2 | 1.9 | 0.0 | 1.0 | 0.5530991 | 222.9  | 2.3  | 221.2  | 3.7  | 203.0  | 36.5  | -9.8   |
| Spot 269 | 295  | 6578.9   | 1.5  | 19.9 | 2.4 | 0.3 | 2.6 | 0.0 | 1.1 | 0.4158393 | 239.3  | 2.5  | 236.7  | 5.5  | 211.1  | 55.0  | -13.4  |
| Spot 27  | 151  | 314714.7 | 2.1  | 12.6 | 1.4 | 2.1 | 2.0 | 0.2 | 1.4 | 0.7132069 | 1144.4 | 14.9 | 1158.0 | 13.8 | 1183.6 | 27.7  | 3.3    |
| Spot 270 | 594  | 10215.5  | 9.0  | 15.5 | 1.4 | 0.6 | 2.1 | 0.1 | 1.6 | 0.7708488 | 422.2  | 6.7  | 477.4  | 8.1  | 751.8  | 28.7  | 43.8   |
| Spot 273 | 187  | 100649.3 | 5.3  | 11.4 | 0.9 | 2.9 | 1.4 | 0.2 | 1.1 | 0.7800432 | 1393.8 | 13.3 | 1384.9 | 10.3 | 1371.2 | 16.4  | -1.6   |
| Spot 276 | 670  | #####    | 1.1  | 20.2 | 1.4 | 0.3 | 2.9 | 0.0 | 2.5 | 0.8705269 | 276.7  | 6.8  | 265.8  | 6.7  | 170.9  | 32.9  | -62.0  |
| Spot 277 | 164  | 16029.5  | 3.0  | 14.5 | 0.8 | 1.5 | 2.2 | 0.2 | 2.0 | 0.92583   | 919.9  | 17.3 | 913.7  | 13.2 | 898.7  | 17.0  | -2.4   |
| Spot 278 | 68   | 5105.6   | 1.2  | 13.2 | 2.0 | 1.9 | 2.6 | 0.2 | 1.6 | 0.6275237 | 1085.9 | 16.1 | 1088.3 | 17.1 | 1093.0 | 39.9  | 0.6    |
| Spot 279 | 713  | 35771.2  | 9.0  | 17.2 | 0.9 | 0.6 | 1.5 | 0.1 | 1.2 | 0.805266  | 491.7  | 5.5  | 500.0  | 5.7  | 538.5  | 18.9  | 8.7    |
| Spot 28  | 890  | 102141.1 | 6.2  | 13.8 | 0.7 | 1.5 | 1.4 | 0.2 | 1.2 | 0.8604    | 928.5  | 10.0 | 949.3  | 8.3  | 998.0  | 14.0  | 7.0    |
| Spot 280 | 133  | 68424.9  | 5.6  | 12.4 | 1.3 | 2.3 | 2.0 | 0.2 | 1.5 | 0.7399362 | 1227.7 | 16.5 | 1220.8 | 14.2 | 1208.7 | 26.5  | -1.6   |
| Spot 281 | 189  | 2270.6   | 1.7  | 20.3 | 3.0 | 0.3 | 3.8 | 0.0 | 2.4 | 0.6161147 | 240.8  | 5.6  | 233.6  | 8.0  | 160.9  | 70.4  | -49.7  |
| Spot 282 | 522  | 7377.0   | 1.1  | 19.6 | 1.9 | 0.3 | 2.3 | 0.0 | 1.3 | 0.5650747 | 281.1  | 3.5  | 277.4  | 5.5  | 246.2  | 43.3  | -14.2  |
| Spot 283 | 240  | 10091.7  | 4.3  | 14.4 | 1.2 | 1.5 | 1.9 | 0.2 | 1.4 | 0.7499589 | 914.3  | 12.1 | 911.7  | 11.4 | 905.4  | 25.7  | -1.0   |
| Spot 284 | 355  | 88276.2  | 1.5  | 18.7 | 2.6 | 0.3 | 3.2 | 0.0 | 1.8 | 0.5674827 | 294.7  | 5.2  | 301.1  | 8.3  | 350.8  | 59.2  | 16.0   |
| Spot 285 | 594  | 12340.3  | 1.8  | 19.6 | 1.5 | 0.3 | 2.4 | 0.0 | 1.8 | 0.756006  | 284.1  | 4.9  | 279.7  | 5.7  | 243.5  | 35.4  | -16.7  |
| Spot 286 | 525  | 8800.7   | 3.8  | 19.5 | 1.9 | 0.3 | 2.3 | 0.0 | 1.4 | 0.6032418 | 237.2  | 3.3  | 238.4  | 5.0  | 249.4  | 43.0  | 4.9    |
| Spot 287 | 447  | 44894.7  | 1.4  | 19.7 | 2.0 | 0.3 | 4.1 | 0.0 | 3.6 | 0.8723552 | 293.5  | 10.4 | 286.6  | 10.3 | 230.8  | 46.8  | -27.2  |

|          |      |          |      |      |      |     |      |     |     |           |        |      |        |      |        |      |         |
|----------|------|----------|------|------|------|-----|------|-----|-----|-----------|--------|------|--------|------|--------|------|---------|
| Spot 289 | 499  | 201411.7 | 2.2  | 9.9  | 0.8  | 3.6 | 1.3  | 0.3 | 1.0 | 0.7527313 | 1492.7 | 12.7 | 1555.3 | 10.1 | 1641.3 | 15.5 | 9.1     |
| Spot 29  | 384  | 14276.6  | 1.8  | 19.5 | 1.4  | 0.3 | 2.4  | 0.0 | 2.0 | 0.811473  | 279.1  | 5.4  | 276.5  | 5.9  | 255.0  | 32.7 | -9.4    |
| Spot 291 | 185  | 14735.6  | 2.7  | 13.3 | 1.2  | 1.9 | 1.9  | 0.2 | 1.4 | 0.7592807 | 1071.6 | 14.1 | 1072.2 | 12.5 | 1073.4 | 24.6 | 0.2     |
| Spot 292 | 299  | 17546.6  | 3.0  | 13.6 | 1.0  | 1.8 | 1.7  | 0.2 | 1.4 | 0.8073294 | 1042.3 | 13.3 | 1037.3 | 11.1 | 1026.7 | 20.4 | -1.5    |
| Spot 293 | 93   | 12213.1  | 1.1  | 12.8 | 1.8  | 2.0 | 2.4  | 0.2 | 1.6 | 0.6537667 | 1094.2 | 16.0 | 1110.4 | 16.5 | 1142.2 | 36.7 | 4.2     |
| Spot 294 | 945  | 69289.0  | 1.9  | 19.7 | 1.4  | 0.3 | 2.0  | 0.0 | 1.5 | 0.7427585 | 285.6  | 4.2  | 279.8  | 5.0  | 231.6  | 31.6 | -23.3   |
| Spot 295 | 451  | 245335.6 | 2.4  | 15.2 | 2.3  | 1.0 | 4.5  | 0.1 | 3.9 | 0.8626113 | 703.5  | 26.1 | 728.3  | 23.6 | 805.4  | 48.1 | 12.7    |
| Spot 296 | 234  | 18764.0  | 5.5  | 11.6 | 1.6  | 2.8 | 1.9  | 0.2 | 1.2 | 0.5948574 | 1372.2 | 14.2 | 1357.9 | 14.5 | 1335.6 | 30.1 | -2.7    |
| Spot 297 | 174  | 5987.0   | 2.1  | 12.7 | 2.0  | 2.1 | 2.8  | 0.2 | 2.0 | 0.7050113 | 1140.7 | 21.0 | 1147.6 | 19.5 | 1160.6 | 40.0 | 1.7     |
| Spot 298 | 393  | 38795.6  | 3.2  | 12.8 | 0.6  | 2.1 | 1.7  | 0.2 | 1.6 | 0.9257558 | 1144.8 | 16.4 | 1148.1 | 11.6 | 1154.3 | 12.7 | 0.8     |
| Spot 299 | 522  | 4767.4   | 1.1  | 20.5 | 1.4  | 0.3 | 1.9  | 0.0 | 1.3 | 0.6968263 | 273.6  | 3.6  | 260.2  | 4.4  | 141.5  | 32.1 | -93.4   |
| Spot 3   | 309  | 15421.5  | 3.4  | 12.6 | 1.2  | 2.2 | 1.6  | 0.2 | 1.2 | 0.7063246 | 1204.2 | 12.7 | 1195.2 | 11.5 | 1178.9 | 22.8 | -2.1    |
| Spot 30  | 432  | 18971.4  | 3.7  | 12.7 | 0.8  | 2.2 | 1.7  | 0.2 | 1.5 | 0.8757086 | 1198.4 | 16.0 | 1184.7 | 11.7 | 1159.6 | 16.0 | -3.3    |
| Spot 301 | 547  | 29764.6  | 40.8 | 13.2 | 1.6  | 1.9 | 2.8  | 0.2 | 2.3 | 0.8278695 | 1095.0 | 23.4 | 1091.4 | 18.7 | 1084.1 | 31.5 | -1.0    |
| Spot 302 | 432  | 11042.4  | 1.3  | 18.7 | 2.5  | 0.3 | 2.8  | 0.0 | 1.3 | 0.4533186 | 286.2  | 3.6  | 292.6  | 7.1  | 343.5  | 56.7 | 16.7    |
| Spot 303 | 156  | 7997.9   | 1.5  | 18.1 | 1.9  | 0.6 | 2.9  | 0.1 | 2.1 | 0.7486512 | 462.9  | 9.5  | 455.0  | 10.5 | 415.3  | 42.3 | -11.5   |
| Spot 304 | 647  | 9611.0   | 15.1 | 12.2 | 1.7  | 0.7 | 2.6  | 0.1 | 1.9 | 0.7490169 | 392.4  | 7.4  | 544.1  | 10.9 | 1243.7 | 33.5 | 68.4    |
| Spot 305 | 216  | 20083.5  | 1.5  | 18.8 | 2.1  | 0.3 | 2.6  | 0.0 | 1.6 | 0.6081622 | 278.4  | 4.4  | 285.2  | 6.6  | 341.4  | 47.5 | 18.5    |
| Spot 306 | 684  | 18949.9  | 10.5 | 16.7 | 1.2  | 0.7 | 2.5  | 0.1 | 2.2 | 0.8866663 | 494.8  | 10.6 | 514.5  | 10.1 | 603.1  | 25.1 | 18.0    |
| Spot 308 | 103  | 10900.7  | 1.9  | 13.6 | 1.0  | 1.7 | 1.9  | 0.2 | 1.6 | 0.8440627 | 976.6  | 14.8 | 994.0  | 12.2 | 1032.6 | 21.0 | 5.4     |
| Spot 309 | 381  | 8002.9   | 4.0  | 19.4 | 2.3  | 0.3 | 2.8  | 0.0 | 1.7 | 0.5960558 | 285.9  | 4.7  | 283.1  | 7.0  | 260.2  | 52.1 | -9.9    |
| Spot 31  | 256  | 114110.6 | 0.6  | 11.9 | 0.8  | 2.6 | 1.6  | 0.2 | 1.4 | 0.8608486 | 1315.4 | 16.3 | 1307.1 | 11.7 | 1293.5 | 15.8 | -1.7    |
| Spot 310 | 249  | 5196.0   | 1.3  | 19.2 | 4.2  | 0.2 | 5.2  | 0.0 | 3.1 | 0.5909747 | 184.7  | 5.6  | 192.6  | 9.1  | 290.9  | 95.4 | 36.5    |
| Spot 311 | 649  | 18808.1  | 1.4  | 17.4 | 1.7  | 0.6 | 2.3  | 0.1 | 1.5 | 0.6733492 | 465.0  | 6.8  | 471.6  | 8.5  | 503.8  | 36.8 | 7.7     |
| Spot 313 | 144  | 3139.5   | 2.3  | 21.5 | 4.5  | 0.3 | 5.3  | 0.0 | 2.8 | 0.5225574 | 276.6  | 7.5  | 251.7  | 11.9 | 25.0   | NA   | -1007.0 |
| Spot 314 | 90   | 12989.2  | 3.4  | 14.6 | 1.4  | 1.4 | 2.1  | 0.2 | 1.6 | 0.7472688 | 905.7  | 13.2 | 897.3  | 12.4 | 876.5  | 28.7 | -3.3    |
| Spot 315 | 124  | 6656.9   | 1.6  | 12.8 | 2.2  | 2.1 | 3.0  | 0.2 | 2.0 | 0.6779505 | 1151.2 | 21.5 | 1151.3 | 20.7 | 1151.5 | 44.0 | 0.0     |
| Spot 32  | 151  | 20654.6  | 1.8  | 12.1 | 1.0  | 2.5 | 1.8  | 0.2 | 1.5 | 0.8374612 | 1292.7 | 17.6 | 1279.7 | 13.1 | 1257.9 | 19.2 | -2.8    |
| Spot 33  | 1311 | 13277.5  | 0.8  | 21.5 | 1.8  | 0.1 | 2.7  | 0.0 | 2.0 | 0.7520436 | 56.2   | 1.1  | 55.5   | 1.4  | 27.5   | NA   | -104.4  |
| Spot 34  | 63   | 1046.1   | 1.5  | 20.6 | 16.0 | 0.2 | 16.3 | 0.0 | 3.2 | 0.1960289 | 177.1  | 5.6  | 173.6  | 26.0 | 126.6  | NA   | -39.9   |
| Spot 35  | 400  | 4927.5   | 1.7  | 20.3 | 3.4  | 0.2 | 5.0  | 0.0 | 3.6 | 0.7297658 | 171.5  | 6.2  | 170.8  | 7.8  | 160.9  | 79.8 | -6.6    |
| Spot 36  | 1579 | 78593.3  | 26.5 | 13.9 | 0.7  | 1.4 | 1.4  | 0.1 | 1.1 | 0.8431063 | 878.5  | 9.4  | 907.5  | 8.1  | 978.6  | 14.8 | 10.2    |
| Spot 37  | 44   | 8704.5   | 1.7  | 16.2 | 4.2  | 0.7 | 5.9  | 0.1 | 4.2 | 0.7070747 | 508.5  | 20.5 | 537.8  | 24.8 | 664.1  | 90.0 | 23.4    |
| Spot 38  | 160  | 9235.0   | 2.9  | 14.5 | 2.5  | 1.5 | 4.5  | 0.2 | 3.7 | 0.8349083 | 931.8  | 32.5 | 920.7  | 27.2 | 894.2  | 51.0 | -4.2    |
| Spot 39  | 93   | 12673.5  | 2.5  | 12.5 | 1.9  | 2.2 | 2.4  | 0.2 | 1.5 | 0.6308697 | 1168.6 | 16.2 | 1180.6 | 16.7 | 1202.5 | 36.7 | 2.8     |
| Spot 4   | 1012 | 7571.4   | 14.5 | 20.3 | 1.6  | 0.2 | 2.2  | 0.0 | 1.5 | 0.6949774 | 230.8  | 3.5  | 224.6  | 4.4  | 160.1  | 37.0 | -44.2   |
| Spot 40  | 167  | 22704.2  | 2.2  | 12.9 | 1.2  | 2.0 | 2.0  | 0.2 | 1.6 | 0.7863719 | 1100.9 | 15.8 | 1113.4 | 13.5 | 1137.9 | 24.4 | 3.3     |
| Spot 41  | 145  | 9745.4   | 2.6  | 12.3 | 2.2  | 2.2 | 2.7  | 0.2 | 1.6 | 0.5876191 | 1144.7 | 16.5 | 1174.7 | 18.7 | 1230.4 | 42.6 | 7.0     |
| Spot 42  | 156  | 26292.9  | 2.1  | 18.8 | 3.0  | 0.3 | 4.4  | 0.0 | 3.2 | 0.7235943 | 286.3  | 8.8  | 291.3  | 11.0 | 331.4  | 68.2 | 13.6    |
| Spot 43  | 151  | 34600.8  | 1.7  | 12.3 | 1.2  | 2.3 | 1.9  | 0.2 | 1.5 | 0.7733722 | 1208.0 | 16.3 | 1212.4 | 13.6 | 1220.3 | 23.9 | 1.0     |
| Spot 44  | 465  | 40829.6  | 17.1 | 19.0 | 1.8  | 0.3 | 2.5  | 0.0 | 1.7 | 0.6764602 | 257.4  | 4.2  | 262.5  | 5.7  | 309.0  | 41.3 | 16.7    |
| Spot 46  | 214  | 23056.3  | 1.6  | 17.8 | 3.4  | 0.3 | 3.7  | 0.0 | 1.5 | 0.4038843 | 253.7  | 3.7  | 274.8  | 9.0  | 458.6  | 75.7 | 44.7    |
| Spot 47  | 62   | 18580.7  | 1.1  | 12.5 | 2.3  | 1.9 | 4.8  | 0.2 | 4.2 | 0.8811855 | 1035.4 | 40.6 | 1090.4 | 32.2 | 1202.0 | 44.9 | 13.9    |

|         |      |          |      |      |     |     |     |     |     |           |        |      |        |      |        |       |        |
|---------|------|----------|------|------|-----|-----|-----|-----|-----|-----------|--------|------|--------|------|--------|-------|--------|
| Spot 48 | 96   | 3911.4   | 1.8  | 16.9 | 6.2 | 0.2 | 7.5 | 0.0 | 4.3 | 0.5687789 | 173.7  | 7.3  | 204.3  | 13.9 | 573.1  | 134.5 | 69.7   |
| Spot 49 | 264  | 1406.3   | 3.6  | 25.3 | 4.6 | 0.1 | 5.0 | 0.0 | 2.1 | 0.4210005 | 99.3   | 2.1  | 82.3   | 4.0  | NA     | NA    |        |
| Spot 5  | 66   | 8060.9   | 2.2  | 12.5 | 1.8 | 2.2 | 2.9 | 0.2 | 2.3 | 0.7946621 | 1155.0 | 24.7 | 1170.5 | 20.4 | 1199.3 | 35.2  | 3.7    |
| Spot 50 | 77   | 3606.4   | 1.2  | 18.0 | 5.9 | 0.2 | 7.1 | 0.0 | 3.9 | 0.5516819 | 199.4  | 7.6  | 218.4  | 13.9 | 428.7  | 131.2 | 53.5   |
| Spot 52 | 274  | 9028.7   | 2.0  | 13.8 | 1.1 | 1.7 | 1.7 | 0.2 | 1.3 | 0.7757011 | 1041.6 | 12.8 | 1026.0 | 11.1 | 993.0  | 22.0  | -4.9   |
| Spot 53 | 240  | 38862.5  | 0.9  | 8.2  | 0.8 | 6.2 | 1.3 | 0.4 | 1.0 | 0.8025975 | 2023.7 | 18.0 | 2000.1 | 11.3 | 1975.7 | 13.7  | -2.4   |
| Spot 54 | 87   | 2375.5   | 0.8  | 19.8 | 5.9 | 0.2 | 7.4 | 0.0 | 4.4 | 0.6005617 | 191.1  | 8.4  | 192.9  | 13.0 | 215.2  | 137.2 | 11.2   |
| Spot 55 | 152  | 18644.9  | 2.6  | 14.2 | 0.8 | 1.5 | 1.5 | 0.2 | 1.2 | 0.8291333 | 927.6  | 10.7 | 931.8  | 9.1  | 941.8  | 17.2  | 1.5    |
| Spot 56 | 161  | 8722.4   | 2.6  | 19.0 | 3.1 | 0.4 | 6.1 | 0.1 | 5.2 | 0.8578907 | 317.2  | 16.1 | 316.5  | 16.5 | 311.2  | 70.8  | -1.9   |
| Spot 57 | 377  | 3403.7   | 1.6  | 21.4 | 1.7 | 0.3 | 2.2 | 0.0 | 1.4 | 0.6316073 | 298.2  | 4.1  | 270.7  | 5.3  | 38.5   | NA    | -674.3 |
| Spot 58 | 720  | 254702.2 | 2.0  | 16.5 | 1.3 | 0.7 | 1.9 | 0.1 | 1.5 | 0.7632555 | 548.5  | 7.8  | 562.7  | 8.4  | 620.4  | 27.1  | 11.6   |
| Spot 59 | 101  | 10549.8  | 1.7  | 16.5 | 2.9 | 0.7 | 4.7 | 0.1 | 3.7 | 0.7857054 | 484.3  | 17.2 | 509.3  | 18.8 | 623.3  | 62.7  | 22.3   |
| Spot 6  | 431  | 25666.6  | 1.9  | 18.7 | 2.1 | 0.3 | 2.6 | 0.0 | 1.5 | 0.5610969 | 280.1  | 4.0  | 287.6  | 6.5  | 349.4  | 48.4  | 19.8   |
| Spot 61 | 222  | 2109.3   | 1.1  | 20.8 | 2.9 | 0.3 | 4.3 | 0.0 | 3.1 | 0.7258612 | 240.8  | 7.3  | 228.4  | 8.7  | 102.1  | 69.3  | -136.0 |
| Spot 62 | 620  | 840362.6 | 19.5 | 11.4 | 0.9 | 2.8 | 1.6 | 0.2 | 1.3 | 0.8434339 | 1335.0 | 16.1 | 1347.5 | 11.8 | 1367.3 | 16.4  | 2.4    |
| Spot 64 | 187  | 295339.5 | 2.6  | 14.5 | 1.2 | 1.4 | 3.2 | 0.1 | 2.9 | 0.9272302 | 890.1  | 24.5 | 892.0  | 18.9 | 896.4  | 24.6  | 0.7    |
| Spot 65 | 199  | 1601.3   | 1.7  | 21.9 | 3.4 | 0.3 | 3.8 | 0.0 | 1.7 | 0.4542837 | 285.9  | 4.8  | 255.3  | 8.5  | NA     | NA    |        |
| Spot 66 | 1117 | 5205.7   | 1.5  | 21.4 | 1.5 | 0.2 | 2.1 | 0.0 | 1.5 | 0.7166822 | 166.4  | 2.5  | 158.2  | 3.1  | 37.0   | 35.7  | -349.6 |
| Spot 67 | 72   | 9128.3   | 4.7  | 12.5 | 2.1 | 1.8 | 6.1 | 0.2 | 5.7 | 0.9372974 | 1000.0 | 52.6 | 1061.2 | 39.9 | 1189.2 | 41.7  | 15.9   |
| Spot 68 | 343  | 31345.1  | 4.5  | 19.3 | 1.7 | 0.3 | 2.9 | 0.0 | 2.3 | 0.8058171 | 234.7  | 5.3  | 238.7  | 6.1  | 278.1  | 38.7  | 15.6   |
| Spot 69 | 240  | 894.9    | 2.0  | 29.0 | 4.0 | 0.1 | 5.0 | 0.0 | 3.0 | 0.6092438 | 179.4  | 5.4  | 128.0  | 6.0  | NA     | NA    |        |
| Spot 7  | 1663 | 26003.2  | 1.2  | 19.1 | 1.0 | 0.3 | 1.6 | 0.0 | 1.2 | 0.7858618 | 274.6  | 3.4  | 276.8  | 3.9  | 295.3  | 22.4  | 7.0    |
| Spot 70 | 73   | 1508.5   | 0.8  | 22.7 | 7.8 | 0.2 | 9.0 | 0.0 | 4.6 | 0.5045958 | 180.7  | 8.1  | 162.0  | 13.5 | NA     | NA    |        |
| Spot 71 | 463  | 34810.7  | 4.8  | 19.1 | 2.5 | 0.3 | 3.0 | 0.0 | 1.8 | 0.5897311 | 246.3  | 4.3  | 250.9  | 6.8  | 294.3  | 56.1  | 16.3   |
| Spot 72 | 234  | 25066.4  | 2.2  | 12.6 | 0.9 | 2.2 | 1.7 | 0.2 | 1.4 | 0.8458924 | 1177.6 | 15.4 | 1177.1 | 11.8 | 1176.1 | 17.9  | -0.1   |
| Spot 73 | 198  | 14805.2  | 2.4  | 18.6 | 4.3 | 0.2 | 5.4 | 0.0 | 3.2 | 0.5983937 | 131.4  | 4.2  | 144.3  | 7.2  | 361.8  | 97.4  | 63.7   |
| Spot 74 | 98   | 2937.7   | 1.6  | 17.1 | 4.0 | 0.4 | 4.5 | 0.1 | 2.0 | 0.4428129 | 315.5  | 6.1  | 344.4  | 13.0 | 544.1  | 87.5  | 42.0   |
| Spot 75 | 422  | 19910.6  | 2.3  | 12.3 | 0.6 | 2.5 | 1.5 | 0.2 | 1.4 | 0.9243157 | 1287.1 | 16.6 | 1265.9 | 11.2 | 1230.2 | 11.5  | -4.6   |
| Spot 76 | 459  | 11877.5  | 1.8  | 18.8 | 2.7 | 0.3 | 3.1 | 0.0 | 1.4 | 0.4695961 | 243.6  | 3.4  | 252.1  | 6.8  | 332.1  | 61.4  | 26.6   |
| Spot 77 | 349  | 12266.7  | 1.2  | 17.7 | 1.5 | 0.6 | 2.2 | 0.1 | 1.6 | 0.7190488 | 475.5  | 7.2  | 474.4  | 8.3  | 469.3  | 33.8  | -1.3   |
| Spot 79 | 776  | 7473.4   | 18.3 | 20.8 | 1.4 | 0.2 | 1.9 | 0.0 | 1.4 | 0.7107685 | 237.4  | 3.2  | 225.7  | 3.9  | 105.2  | 32.1  | -125.6 |
| Spot 8  | 122  | 9800.7   | 2.0  | 13.5 | 2.7 | 1.6 | 3.2 | 0.2 | 1.7 | 0.5350175 | 961.2  | 15.3 | 987.9  | 20.2 | 1048.0 | 54.4  | 8.3    |
| Spot 80 | 130  | 1461.9   | 1.8  | 22.9 | 4.3 | 0.3 | 6.9 | 0.0 | 5.4 | 0.7819407 | 279.4  | 14.8 | 240.2  | 14.8 | NA     | NA    |        |
| Spot 82 | 194  | 9145.1   | 2.0  | 14.0 | 1.3 | 1.6 | 1.8 | 0.2 | 1.3 | 0.7235543 | 944.6  | 11.6 | 954.0  | 11.3 | 975.7  | 25.7  | 3.2    |
| Spot 83 | 230  | 172626.1 | 2.4  | 12.7 | 1.0 | 2.2 | 1.8 | 0.2 | 1.4 | 0.8038437 | 1173.7 | 15.1 | 1169.0 | 12.2 | 1160.1 | 20.7  | -1.2   |
| Spot 84 | 404  | 10198.9  | 2.3  | 19.9 | 1.7 | 0.3 | 2.3 | 0.0 | 1.5 | 0.6594862 | 286.6  | 4.2  | 278.3  | 5.5  | 209.6  | 39.6  | -36.7  |
| Spot 85 | 71   | 3786.7   | 2.8  | 14.7 | 2.2 | 1.3 | 2.8 | 0.1 | 1.8 | 0.6409285 | 863.6  | 14.8 | 866.6  | 16.6 | 874.2  | 45.3  | 1.2    |
| Spot 86 | 156  | 4378.6   | 1.8  | 21.0 | 4.4 | 0.2 | 4.8 | 0.0 | 2.0 | 0.4170713 | 210.7  | 4.1  | 199.9  | 8.7  | 74.2   | NA    | -183.9 |
| Spot 88 | 492  | 205600.9 | 2.4  | 10.8 | 1.2 | 3.0 | 1.9 | 0.2 | 1.5 | 0.7896748 | 1385.9 | 18.8 | 1419.8 | 14.6 | 1470.9 | 22.2  | 5.8    |
| Spot 89 | 172  | 6101.6   | 1.8  | 20.2 | 2.6 | 0.3 | 3.2 | 0.0 | 1.9 | 0.6000296 | 290.1  | 5.5  | 277.7  | 7.9  | 174.9  | 60.6  | -65.8  |
| Spot 9  | 159  | 33834.3  | 3.5  | 12.8 | 0.9 | 2.0 | 2.4 | 0.2 | 2.3 | 0.9321492 | 1124.0 | 23.4 | 1132.1 | 16.6 | 1147.7 | 17.5  | 2.1    |
| Spot 90 | 181  | 22954.4  | 1.1  | 12.0 | 1.0 | 2.5 | 1.8 | 0.2 | 1.5 | 0.8441037 | 1271.3 | 17.6 | 1270.8 | 13.1 | 1269.8 | 18.9  | -0.1   |
| Spot 91 | 41   | 4267.8   | 1.8  | 13.3 | 1.8 | 1.9 | 2.3 | 0.2 | 1.5 | 0.6411082 | 1099.6 | 15.2 | 1090.2 | 15.7 | 1071.5 | 36.2  | -2.6   |

|                    |     |          |     |      |      |     |      |     |      |           |        |       |        |      |        |       |        |
|--------------------|-----|----------|-----|------|------|-----|------|-----|------|-----------|--------|-------|--------|------|--------|-------|--------|
| Spot 92            | 134 | 27218.3  | 2.4 | 14.5 | 2.1  | 1.5 | 3.2  | 0.2 | 2.4  | 0.7550511 | 936.7  | 20.8  | 925.6  | 19.2 | 899.4  | 42.8  | -4.1   |
| Spot 93            | 137 | 8475.2   | 1.6 | 12.4 | 1.5  | 2.2 | 2.2  | 0.2 | 1.6  | 0.7382121 | 1189.3 | 17.7  | 1196.7 | 15.5 | 1210.2 | 29.2  | 1.7    |
| Spot 95            | 567 | 14663.4  | 5.7 | 16.6 | 2.2  | 0.5 | 2.5  | 0.1 | 1.3  | 0.5084743 | 396.1  | 4.9   | 429.4  | 8.8  | 612.3  | 46.5  | 35.3   |
| Spot 96            | 374 | 13091.4  | 4.3 | 19.7 | 1.9  | 0.3 | 2.5  | 0.0 | 1.7  | 0.6710478 | 244.4  | 4.1   | 242.7  | 5.4  | 226.0  | 43.2  | -8.1   |
| Spot 97            | 668 | 22606.2  | 3.9 | 13.8 | 1.5  | 1.6 | 2.4  | 0.2 | 1.9  | 0.7876913 | 970.8  | 17.4  | 980.1  | 15.4 | 1000.9 | 30.6  | 3.0    |
| Spot 98            | 537 | 6230.7   | 1.9 | 19.3 | 2.1  | 0.3 | 2.9  | 0.0 | 2.0  | 0.6812623 | 278.3  | 5.4   | 277.9  | 7.0  | 274.4  | 48.5  | -1.4   |
| Run 1 (discordant) |     |          |     |      |      |     |      |     |      |           |        |       |        |      |        |       |        |
| Spot 106           | 289 | 46892.0  | 2.9 | 11.9 | 1.0  | 2.8 | 1.8  | 0.2 | 1.5  | 0.8383974 | 1385.9 | 18.8  | 1352.0 | 13.5 | 1298.8 | 19.1  | -6.7   |
| Spot 107           | 189 | 7042.9   | 2.2 | 14.7 | 1.3  | 1.5 | 1.8  | 0.2 | 1.2  | 0.6601156 | 936.2  | 10.2  | 916.6  | 10.7 | 869.7  | 27.7  | -7.6   |
| Spot 109           | 297 | 96607.2  | 1.7 | 8.7  | 1.5  | 3.9 | 2.6  | 0.2 | 2.2  | 0.8225148 | 1430.0 | 27.8  | 1620.4 | 21.3 | 1877.3 | 27.0  | 23.8   |
| Spot 11            | 419 | 11804.5  | 4.0 | 14.3 | 0.8  | 1.6 | 1.7  | 0.2 | 1.5  | 0.8780885 | 1007.5 | 14.2  | 980.1  | 10.9 | 919.4  | 17.0  | -9.6   |
| Spot 110           | 246 | 21617.7  | 1.1 | 13.7 | 1.3  | 1.8 | 1.8  | 0.2 | 1.3  | 0.7287204 | 1078.5 | 13.4  | 1055.0 | 12.1 | 1006.6 | 25.6  | -7.1   |
| Spot 111           | 462 | 126881.5 | 2.1 | 13.2 | 3.2  | 2.3 | 4.3  | 0.2 | 2.8  | 0.6525495 | 1262.1 | 31.9  | 1198.6 | 30.0 | 1086.0 | 64.8  | -16.2  |
| Spot 112           | 83  | 2072.4   | 3.9 | 16.1 | 1.6  | 1.2 | 2.6  | 0.1 | 2.1  | 0.7992152 | 874.9  | 17.1  | 822.0  | 14.7 | 681.5  | 33.5  | -28.4  |
| Spot 115           | 42  | 12871.4  | 2.6 | 10.7 | 3.4  | 2.5 | 4.7  | 0.2 | 3.4  | 0.7074638 | 1149.7 | 35.3  | 1273.9 | 34.4 | 1490.0 | 63.5  | 22.8   |
| Spot 117           | 136 | 3252.6   | 1.2 | 18.6 | 5.0  | 0.3 | 10.6 | 0.0 | 9.3  | 0.8824936 | 220.3  | 20.2  | 232.3  | 22.0 | 355.3  | 112.4 | 38.0   |
| Spot 119           | 21  | 991.2    | 3.7 | 15.8 | 5.7  | 1.4 | 7.0  | 0.2 | 4.1  | 0.5852841 | 935.1  | 35.6  | 873.4  | 41.0 | 720.2  | 120.5 | -29.8  |
| Spot 127           | 71  | 7235.5   | 0.8 | 15.0 | 1.4  | 1.3 | 1.9  | 0.1 | 1.3  | 0.6702897 | 881.7  | 10.3  | 864.3  | 10.9 | 819.7  | 29.0  | -7.6   |
| Spot 14            | 165 | 7160.4   | 2.9 | 10.4 | 4.0  | 2.0 | 4.3  | 0.2 | 1.5  | 0.3629806 | 912.4  | 13.2  | 1123.4 | 29.0 | 1557.9 | 74.6  | 41.4   |
| Spot 149           | 134 | 14300.4  | 1.4 | 15.3 | 3.1  | 1.4 | 7.7  | 0.2 | 7.1  | 0.9154025 | 930.6  | 61.4  | 886.9  | 45.8 | 779.4  | 65.5  | -19.4  |
| Spot 151           | 254 | 19673.0  | 3.2 | 10.9 | 4.9  | 2.2 | 9.6  | 0.2 | 8.2  | 0.8586532 | 1031.0 | 78.3  | 1178.9 | 66.8 | 1461.5 | 93.3  | 29.5   |
| Spot 152           | 143 | 7174.2   | 0.7 | 23.1 | 3.8  | 0.3 | 30.2 | 0.0 | 30.0 | 0.9919806 | 266.2  | 78.2  | 227.7  | 61.8 | NA     | NA    |        |
| Spot 154           | 114 | 5096.7   | 1.0 | 14.3 | 1.2  | 1.6 | 1.6  | 0.2 | 1.2  | 0.7118507 | 984.9  | 10.7  | 965.8  | 10.3 | 922.5  | 23.8  | -6.8   |
| Spot 155           | 259 | 45356.2  | 4.3 | 13.1 | 4.1  | 2.7 | 11.3 | 0.3 | 10.6 | 0.9337758 | 1477.6 | 139.6 | 1333.6 | 84.2 | 1109.2 | 81.0  | -33.2  |
| Spot 163           | 433 | 5629.2   | 1.3 | 23.7 | 2.4  | 0.2 | 14.3 | 0.0 | 14.0 | 0.9854819 | 198.9  | 27.5  | 169.9  | 22.3 | NA     | NA    |        |
| Spot 166           | 244 | 37897.0  | 8.7 | 14.4 | 0.9  | 1.6 | 1.7  | 0.2 | 1.4  | 0.8570534 | 983.6  | 13.2  | 959.4  | 10.5 | 904.1  | 17.9  | -8.8   |
| Spot 171           | 377 | 7233.6   | 1.6 | 22.5 | 2.1  | 0.3 | 17.4 | 0.0 | 17.2 | 0.9929379 | 290.5  | 49.0  | 252.8  | 38.9 | NA     | NA    |        |
| Spot 175           | 126 | 593.7    | 1.8 | 29.8 | 6.7  | 0.1 | 10.8 | 0.0 | 8.5  | 0.7852573 | 193.6  | 16.1  | 133.9  | 13.5 | NA     | NA    |        |
| Spot 178           | 59  | 3633.1   | 1.7 | 18.2 | 4.3  | 0.7 | 17.4 | 0.1 | 16.8 | 0.9693787 | 596.6  | 96.0  | 558.6  | 74.8 | 406.4  | 95.5  | -46.8  |
| Spot 18            | 262 | 22092.7  | 3.4 | 12.2 | 0.9  | 2.7 | 2.2  | 0.2 | 2.0  | 0.9109932 | 1389.3 | 25.3  | 1335.9 | 16.5 | 1251.1 | 17.9  | -11.0  |
| Spot 199           | 125 | 74949.2  | 3.9 | 13.5 | 4.4  | 2.1 | 8.5  | 0.2 | 7.3  | 0.8524485 | 1209.8 | 80.0  | 1151.7 | 58.7 | 1043.8 | 89.8  | -15.9  |
| Spot 2             | 139 | 5049.2   | 2.4 | 14.7 | 1.3  | 1.5 | 3.0  | 0.2 | 2.7  | 0.8994381 | 930.9  | 23.1  | 911.4  | 17.8 | 864.7  | 26.8  | -7.7   |
| Spot 204           | 32  | 4500.4   | 3.2 | 15.3 | 2.2  | 1.3 | 3.0  | 0.1 | 2.0  | 0.6740317 | 892.9  | 17.1  | 862.4  | 17.7 | 784.9  | 47.2  | -13.8  |
| Spot 208           | 576 | 18699.8  | 0.3 | 11.2 | 1.7  | 2.2 | 2.6  | 0.2 | 2.0  | 0.7615086 | 1054.6 | 19.2  | 1174.3 | 18.0 | 1402.0 | 32.1  | 24.8   |
| Spot 213           | 27  | 3380.8   | 2.4 | 19.1 | 7.4  | 0.2 | 12.0 | 0.0 | 9.4  | 0.7863961 | 202.2  | 18.8  | 210.0  | 22.7 | 297.8  | 169.1 | 32.1   |
| Spot 216           | 226 | 4479.0   | 2.5 | 21.2 | 3.3  | 0.2 | 9.1  | 0.0 | 8.4  | 0.9296265 | 178.6  | 14.8  | 170.3  | 14.2 | 56.5   | NA    | -216.0 |
| Spot 219           | 18  | 1352.0   | 0.3 | 15.9 | 4.9  | 1.8 | 8.3  | 0.2 | 6.7  | 0.8105993 | 1196.9 | 73.4  | 1034.9 | 53.9 | 706.8  | 103.4 | -69.3  |
| Spot 220           | 146 | 894.5    | 2.6 | 53.8 | 13.5 | 0.0 | 32.9 | 0.0 | 30.0 | 0.9118153 | 120.6  | 35.9  | 47.9   | 15.4 | NA     | NA    |        |
| Spot 23            | 44  | 4102.5   | 1.5 | 13.5 | 2.1  | 2.0 | 2.8  | 0.2 | 1.8  | 0.6663395 | 1131.5 | 19.2  | 1102.5 | 18.7 | 1045.5 | 41.7  | -8.2   |
| Spot 230           | 132 | 25484.1  | 4.4 | 12.9 | 1.3  | 2.5 | 1.6  | 0.2 | 1.0  | 0.6019421 | 1371.0 | 12.0  | 1280.5 | 11.7 | 1131.7 | 25.6  | -21.1  |
| Spot 233           | 730 | 20615.7  | 9.7 | 14.2 | 1.0  | 1.2 | 2.3  | 0.1 | 2.1  | 0.9085678 | 726.3  | 14.4  | 782.6  | 12.6 | 946.9  | 19.7  | 23.3   |
| Spot 241           | 169 | 25402.1  | 2.7 | 12.9 | 0.9  | 2.2 | 1.8  | 0.2 | 1.5  | 0.8663161 | 1199.6 | 16.9  | 1178.9 | 12.4 | 1141.3 | 17.7  | -5.1   |
| Spot 258           | 193 | 9339.9   | 3.9 | 7.9  | 4.0  | 3.9 | 4.3  | 0.2 | 1.5  | 0.3565532 | 1292.3 | 17.9  | 1612.2 | 34.7 | 2059.5 | 70.8  | 37.3   |

|          |     |          |      |      |      |     |      |     |      |           |        |       |        |       |        |       |         |
|----------|-----|----------|------|------|------|-----|------|-----|------|-----------|--------|-------|--------|-------|--------|-------|---------|
| Spot 261 | 133 | 3069.3   | 3.3  | 14.9 | 1.0  | 1.4 | 1.9  | 0.2 | 1.6  | 0.8408587 | 912.7  | 13.4  | 893.3  | 11.1  | 845.7  | 21.1  | -7.9    |
| Spot 264 | 55  | 3006.9   | 3.2  | 15.0 | 2.7  | 1.4 | 6.0  | 0.1 | 5.4  | 0.8973944 | 887.9  | 44.7  | 872.1  | 35.2  | 832.2  | 55.3  | -6.7    |
| Spot 271 | 237 | 9494.8   | 3.5  | 13.8 | 1.6  | 1.8 | 2.3  | 0.2 | 1.7  | 0.7267268 | 1051.9 | 16.5  | 1034.2 | 15.1  | 996.8  | 32.6  | -5.5    |
| Spot 272 | 303 | 109880.2 | 1.7  | 13.5 | 1.6  | 1.2 | 3.0  | 0.1 | 2.5  | 0.8363107 | 722.0  | 17.2  | 804.7  | 16.7  | 1040.8 | 33.3  | 30.6    |
| Spot 274 | 22  | 1287.0   | 2.2  | 15.2 | 3.7  | 1.4 | 4.4  | 0.2 | 2.5  | 0.5587065 | 949.4  | 21.8  | 905.3  | 26.4  | 799.3  | 76.7  | -18.8   |
| Spot 275 | 91  | 809.9    | 1.5  | 25.9 | 25.1 | 0.2 | 28.8 | 0.0 | 14.0 | 0.4884643 | 209.7  | 29.0  | 164.7  | 43.7  | NA     | NA    |         |
| Spot 288 | 162 | 8323.3   | 1.2  | 16.0 | 1.5  | 1.1 | 2.1  | 0.1 | 1.4  | 0.6868541 | 757.2  | 10.1  | 740.9  | 10.9  | 691.9  | 32.0  | -9.4    |
| Spot 290 | 517 | 7143.0   | 5.3  | 24.4 | 2.8  | 0.3 | 18.7 | 0.0 | 18.5 | 0.9886936 | 295.8  | 53.5  | 238.4  | 39.8  | NA     | NA    |         |
| Spot 300 | 62  | 2952.4   | 2.6  | 19.9 | 2.9  | 1.3 | 3.2  | 0.2 | 1.5  | 0.4639574 | 1104.8 | 15.2  | 844.1  | 18.5  | 208.7  | 66.2  | -429.3  |
| Spot 307 | 72  | 12209.8  | 3.4  | 11.1 | 7.4  | 2.6 | 30.9 | 0.2 | 30.0 | 0.9710694 | 1225.7 | 335.2 | 1299.9 | 230.4 | 1424.5 | 141.1 | 14.0    |
| Spot 312 | 92  | 3799.5   | 2.1  | 14.7 | 1.9  | 1.5 | 3.2  | 0.2 | 2.5  | 0.8040695 | 936.1  | 22.1  | 915.0  | 19.0  | 864.2  | 38.9  | -8.3    |
| Spot 45  | 71  | 2042.8   | 1.7  | 15.4 | 2.6  | 1.4 | 3.2  | 0.2 | 1.8  | 0.5733901 | 920.1  | 15.5  | 879.3  | 18.6  | 777.8  | 54.4  | -18.3   |
| Spot 51  | 168 | 295114.7 | 3.7  | 11.9 | 4.5  | 2.8 | 8.4  | 0.2 | 7.1  | 0.8434666 | 1411.7 | 90.2  | 1365.1 | 63.4  | 1292.8 | 88.1  | -9.2    |
| Spot 60  | 244 | 14106.6  | 6.0  | 14.1 | 1.4  | 1.7 | 2.1  | 0.2 | 1.5  | 0.7311149 | 1010.1 | 14.1  | 992.0  | 13.0  | 952.4  | 28.7  | -6.1    |
| Spot 63  | 215 | 100729.4 | 3.2  | 12.4 | 1.0  | 2.5 | 1.8  | 0.2 | 1.5  | 0.8374231 | 1296.2 | 17.5  | 1263.2 | 12.9  | 1207.3 | 19.2  | -7.4    |
| Spot 78  | 211 | 11018.5  | 4.3  | 14.3 | 1.3  | 1.6 | 1.7  | 0.2 | 1.2  | 0.6875087 | 1015.8 | 11.2  | 989.5  | 11.0  | 931.8  | 25.9  | -9.0    |
| Spot 81  | 220 | 8753.6   | 2.1  | 14.4 | 1.5  | 1.5 | 2.3  | 0.2 | 1.8  | 0.7624385 | 964.7  | 15.7  | 948.2  | 14.2  | 909.9  | 30.7  | -6.0    |
| Spot 87  | 177 | 18636.3  | 2.0  | 12.8 | 1.2  | 2.3 | 2.3  | 0.2 | 1.9  | 0.8410582 | 1225.3 | 21.5  | 1199.9 | 16.2  | 1154.4 | 24.7  | -6.1    |
| Spot 94  | 839 | 22142.6  | 62.8 | 21.7 | 1.8  | 0.3 | 13.6 | 0.0 | 13.5 | 0.9910982 | 260.3  | 34.5  | 235.9  | 28.7  | -0.4   | NA    | 63440.2 |
| Spot 99  | 169 | 6418.1   | 2.8  | 14.9 | 1.7  | 1.6 | 5.0  | 0.2 | 4.7  | 0.9440415 | 1024.6 | 45.0  | 968.0  | 31.4  | 841.7  | 34.5  | -21.7   |

|              |      |          |      |      |     |     |     |     |     |           |        |      |        |      |        |       |       |
|--------------|------|----------|------|------|-----|-----|-----|-----|-----|-----------|--------|------|--------|------|--------|-------|-------|
| <b>Run 2</b> |      |          |      |      |     |     |     |     |     |           |        |      |        |      |        |       |       |
| Spot 1       | 400  | 4302.7   | 1.1  | 19.0 | 2.3 | 0.2 | 3.5 | 0.0 | 1.9 | 0.5374204 | 158.0  | 2.9  | 160.3  | 5.1  | 194.9  | 67.7  | 18.9  |
| Spot 2       | 60   | 12815.7  | 1.8  | 12.5 | 2.7 | 2.1 | 3.5 | 0.2 | 2.2 | 0.6392367 | 1104.8 | 22.5 | 1139.4 | 23.7 | 1205.8 | 52.5  | 8.4   |
| Spot 3       | 242  | 9383.3   | 2.3  | 13.2 | 1.0 | 1.9 | 1.9 | 0.2 | 1.6 | 0.8310189 | 1082.6 | 16.1 | 1079.1 | 12.9 | 1071.9 | 21.7  | -1.0  |
| Spot 4       | 131  | 14220.8  | 1.3  | 13.7 | 1.5 | 1.6 | 3.0 | 0.2 | 2.5 | 0.8550675 | 934.2  | 22.1 | 958.6  | 18.4 | 1015.0 | 31.2  | 8.0   |
| Spot 5       | 59   | 2010.1   | 1.3  | 15.8 | 6.7 | 0.3 | 8.0 | 0.0 | 4.0 | 0.5041015 | 257.6  | 10.2 | 282.1  | 19.7 | 490.7  | 152.3 | 47.5  |
| Spot 6       | 235  | 3927.1   | 2.2  | 17.1 | 3.2 | 0.4 | 3.6 | 0.0 | 1.6 | 0.4390255 | 287.8  | 4.5  | 304.8  | 9.6  | 436.9  | 72.7  | 34.1  |
| Spot 8       | 271  | 20092.0  | 3.4  | 14.2 | 1.0 | 1.5 | 1.7 | 0.2 | 1.3 | 0.8026998 | 938.9  | 11.8 | 943.5  | 10.3 | 954.4  | 20.5  | 1.6   |
| Spot 10      | 857  | 12802.8  | 1.4  | 19.1 | 1.2 | 0.3 | 2.0 | 0.0 | 1.4 | 0.7102169 | 265.9  | 3.6  | 268.1  | 4.6  | 286.8  | 31.7  | 7.3   |
| Spot 11      | 250  | 57880.7  | 3.4  | 12.3 | 1.1 | 2.0 | 3.5 | 0.2 | 3.3 | 0.946373  | 1057.1 | 32.4 | 1123.0 | 23.9 | 1252.8 | 22.2  | 15.6  |
| Spot 12      | 238  | 18016.0  | 5.1  | 13.4 | 1.5 | 1.7 | 2.2 | 0.2 | 1.6 | 0.7125958 | 1008.8 | 14.5 | 1026.0 | 14.1 | 1062.7 | 30.7  | 5.1   |
| Spot 13      | 364  | 12368.2  | 1.3  | 19.6 | 1.2 | 0.3 | 1.9 | 0.0 | 1.4 | 0.7513856 | 279.7  | 3.8  | 273.3  | 4.5  | 219.4  | 28.4  | -27.5 |
| Spot 14      | 95   | 1459.7   | 1.5  | 19.2 | 2.5 | 0.3 | 3.8 | 0.0 | 2.0 | 0.5237807 | 292.4  | 5.7  | 245.0  | 8.3  | NA     | NA    |       |
| Spot 15      | 832  | 170930.2 | 1.4  | 12.8 | 0.7 | 2.2 | 1.9 | 0.2 | 1.8 | 0.9358375 | 1160.9 | 19.2 | 1168.1 | 13.4 | 1181.5 | 13.4  | 1.7   |
| Spot 16      | 625  | #####    | 4.7  | 11.6 | 0.9 | 2.7 | 2.0 | 0.2 | 1.8 | 0.9053376 | 1305.1 | 21.8 | 1329.1 | 15.1 | 1367.9 | 16.7  | 4.6   |
| Spot 17      | 1126 | 47652.2  | 13.7 | 14.3 | 1.0 | 1.5 | 1.8 | 0.2 | 1.5 | 0.8447193 | 929.2  | 13.1 | 934.4  | 10.9 | 946.7  | 19.6  | 1.8   |
| Spot 18      | 88   | 2522.9   | 1.1  | 16.4 | 3.9 | 0.7 | 8.2 | 0.1 | 4.9 | 0.5982342 | 592.1  | 27.7 | 564.6  | 35.4 | 455.3  | 145.6 | -30.1 |
| Spot 20      | 92   | 56074.0  | 3.6  | 12.5 | 1.5 | 2.3 | 2.1 | 0.2 | 1.5 | 0.6999486 | 1219.3 | 16.3 | 1221.8 | 14.9 | 1226.1 | 29.4  | 0.6   |
| Spot 24      | 824  | 5609.2   | 2.3  | 19.5 | 1.0 | 0.3 | 3.1 | 0.0 | 1.4 | 0.4586195 | 238.8  | 3.3  | 232.2  | 6.4  | 166.4  | 63.6  | -43.5 |
| Spot 25      | 1075 | 34118.4  | 1.6  | 19.1 | 1.2 | 0.3 | 1.9 | 0.0 | 1.5 | 0.7673663 | 274.6  | 4.0  | 278.9  | 4.7  | 315.4  | 28.0  | 12.9  |
| Spot 26      | 102  | 12859.5  | 1.1  | 12.3 | 1.4 | 2.3 | 2.2 | 0.2 | 1.6 | 0.7574275 | 1212.9 | 18.2 | 1217.6 | 15.4 | 1226.0 | 27.9  | 1.1   |
| Spot 28      | 260  | 11955.0  | 2.7  | 20.2 | 3.5 | 0.2 | 5.2 | 0.0 | 3.8 | 0.7358276 | 172.2  | 6.5  | 170.1  | 8.1  | 141.9  | 82.5  | -21.3 |
| Spot 30      | 139  | 6836.5   | 3.6  | 12.9 | 1.1 | 1.8 | 2.0 | 0.2 | 1.5 | 0.7775389 | 1037.1 | 14.8 | 1058.7 | 13.1 | 1103.6 | 25.0  | 6.0   |



|         |      |          |     |      |     |     |      |     |     |           |        |      |        |      |        |       |        |
|---------|------|----------|-----|------|-----|-----|------|-----|-----|-----------|--------|------|--------|------|--------|-------|--------|
| Spot 32 | 1099 | 28978.7  | 5.8 | 19.4 | 1.5 | 0.3 | 2.1  | 0.0 | 1.4 | 0.6989395 | 236.2  | 3.3  | 239.7  | 4.4  | 274.1  | 33.6  | 13.8   |
| Spot 33 | 1176 | 38051.7  | 0.8 | 18.9 | 0.8 | 0.3 | 2.0  | 0.0 | 1.8 | 0.901528  | 266.8  | 4.7  | 273.7  | 4.8  | 333.8  | 19.5  | 20.1   |
| Spot 34 | 339  | 2481.6   | 1.7 | 19.3 | 2.2 | 0.2 | 7.1  | 0.0 | 1.8 | 0.2595047 | 202.8  | 3.7  | 189.1  | 12.3 | 22.0   | NA    | -819.6 |
| Spot 36 | 514  | #####    | 2.0 | 10.0 | 1.0 | 3.8 | 1.9  | 0.3 | 1.7 | 0.8595423 | 1534.1 | 22.6 | 1584.9 | 15.5 | 1653.2 | 18.3  | 7.2    |
| Spot 37 | 296  | 8472.2   | 1.4 | 19.7 | 2.6 | 0.2 | 2.9  | 0.0 | 1.3 | 0.4388483 | 168.2  | 2.1  | 169.0  | 4.5  | 179.3  | 60.0  | 6.2    |
| Spot 38 | 653  | 30477.0  | 3.0 | 11.8 | 0.7 | 2.7 | 1.4  | 0.2 | 1.2 | 0.8685816 | 1318.4 | 14.0 | 1318.5 | 10.0 | 1318.7 | 13.0  | 0.0    |
| Spot 39 | 444  | 4286.4   | 1.7 | 19.0 | 1.8 | 0.3 | 2.5  | 0.0 | 1.6 | 0.6239899 | 277.9  | 4.3  | 268.5  | 6.0  | 187.1  | 46.2  | -48.6  |
| Spot 40 | 179  | 1885.8   | 1.0 | 16.8 | 3.5 | 0.3 | 6.6  | 0.0 | 2.4 | 0.3645802 | 280.2  | 6.6  | 283.1  | 16.3 | 306.5  | 140.4 | 8.6    |
| Spot 41 | 1085 | 10244.0  | 1.4 | 19.0 | 1.4 | 0.3 | 1.9  | 0.0 | 1.2 | 0.6538225 | 260.4  | 3.1  | 261.9  | 4.3  | 275.6  | 32.6  | 5.5    |
| Spot 42 | 71   | 58628.9  | 2.6 | 13.4 | 2.4 | 1.6 | 3.1  | 0.2 | 2.1 | 0.6583184 | 931.6  | 17.8 | 973.7  | 19.6 | 1070.1 | 47.3  | 12.9   |
| Spot 43 | 124  | 24599.6  | 5.0 | 17.7 | 5.8 | 0.1 | 7.5  | 0.0 | 4.8 | 0.6344979 | 106.4  | 5.0  | 123.7  | 8.8  | 472.3  | 128.7 | 77.5   |
| Spot 44 | 1895 | 34373.9  | 1.8 | 17.4 | 1.0 | 0.7 | 1.6  | 0.1 | 1.2 | 0.7796978 | 537.5  | 6.4  | 534.1  | 6.6  | 519.3  | 21.9  | -3.5   |
| Spot 45 | 324  | 11142.2  | 2.7 | 11.9 | 0.8 | 2.5 | 1.3  | 0.2 | 1.1 | 0.8019399 | 1260.4 | 12.3 | 1267.1 | 9.7  | 1278.5 | 15.6  | 1.4    |
| Spot 46 | 101  | 1218.0   | 0.6 | 9.9  | 7.0 | 1.0 | 7.6  | 0.1 | 2.4 | 0.3208583 | 500.3  | 11.8 | 709.4  | 39.0 | 1443.7 | 137.9 | 65.3   |
| Spot 47 | 1294 | 31400.5  | 1.6 | 18.8 | 1.0 | 0.3 | 1.8  | 0.0 | 1.5 | 0.8292076 | 268.3  | 3.8  | 277.1  | 4.3  | 351.4  | 22.3  | 23.6   |
| Spot 48 | 100  | 9042.7   | 1.5 | 13.8 | 1.9 | 1.5 | 2.8  | 0.1 | 2.0 | 0.7136415 | 893.1  | 16.4 | 918.3  | 16.6 | 979.4  | 39.3  | 8.8    |
| Spot 49 | 168  | 1479.7   | 0.8 | 19.5 | 2.7 | 0.2 | 4.1  | 0.0 | 2.7 | 0.6627429 | 192.6  | 5.2  | 163.7  | 6.2  | NA     | NA    |        |
| Spot 50 | 132  | 3335.9   | 2.9 | 14.0 | 1.2 | 1.3 | 2.2  | 0.1 | 1.9 | 0.8411322 | 849.3  | 14.9 | 853.7  | 12.8 | 865.2  | 24.9  | 1.8    |
| Spot 51 | 244  | 949.5    | 2.3 | 21.3 | 3.5 | 0.0 | 20.0 | 0.0 | 2.7 | 0.1361254 | 68.4   | 1.9  | 45.9   | 9.0  | NA     | NA    |        |
| Spot 52 | 222  | 2877.5   | 4.6 | 17.9 | 2.3 | 0.3 | 4.1  | 0.0 | 1.9 | 0.4606037 | 269.5  | 4.9  | 267.9  | 9.6  | 254.1  | 83.0  | -6.1   |
| Spot 53 | 1213 | 14741.1  | 1.5 | 19.3 | 1.2 | 0.3 | 1.9  | 0.0 | 1.3 | 0.6935802 | 270.5  | 3.4  | 268.8  | 4.4  | 254.6  | 31.0  | -6.2   |
| Spot 54 | 162  | 5258.5   | 2.1 | 13.5 | 2.3 | 1.5 | 2.6  | 0.2 | 1.3 | 0.4780145 | 919.8  | 10.8 | 942.1  | 16.2 | 994.6  | 47.0  | 7.5    |
| Spot 57 | 205  | 143426.6 | 2.8 | 13.6 | 1.3 | 1.6 | 2.1  | 0.2 | 1.7 | 0.8021813 | 942.3  | 15.1 | 972.8  | 13.4 | 1042.2 | 25.8  | 9.6    |
| Spot 58 | 255  | 5277.4   | 1.4 | 19.3 | 2.0 | 0.3 | 2.8  | 0.0 | 2.0 | 0.6945225 | 283.5  | 5.5  | 271.8  | 6.8  | 171.6  | 47.7  | -65.2  |
| Spot 59 | 90   | 9026.6   | 1.4 | 13.4 | 2.3 | 1.7 | 3.1  | 0.2 | 2.0 | 0.6538877 | 969.7  | 18.0 | 990.3  | 19.3 | 1036.0 | 46.7  | 6.4    |
| Spot 60 | 127  | 6981.9   | 4.1 | 13.5 | 1.2 | 1.7 | 2.4  | 0.2 | 1.6 | 0.6636808 | 1004.0 | 14.7 | 1005.5 | 15.2 | 1008.7 | 36.2  | 0.5    |
| Spot 61 | 776  | 13754.9  | 1.2 | 19.2 | 1.0 | 0.3 | 1.8  | 0.0 | 1.4 | 0.7829439 | 265.2  | 3.6  | 265.5  | 4.1  | 268.2  | 25.3  | 1.1    |
| Spot 63 | 365  | 7906.9   | 1.2 | 19.3 | 1.2 | 0.3 | 2.0  | 0.0 | 1.6 | 0.7961997 | 279.0  | 4.4  | 272.6  | 4.8  | 218.1  | 28.3  | -27.9  |
| Spot 64 | 501  | 18997.5  | 1.3 | 19.4 | 1.3 | 0.3 | 1.9  | 0.0 | 1.3 | 0.7238584 | 285.8  | 3.8  | 282.4  | 4.6  | 254.3  | 29.5  | -12.4  |
| Spot 66 | 180  | 21427.6  | 2.5 | 13.5 | 1.3 | 1.8 | 1.8  | 0.2 | 1.2 | 0.684324  | 1060.2 | 11.9 | 1055.5 | 11.6 | 1045.7 | 26.1  | -1.4   |
| Spot 67 | 181  | 4651.8   | 1.2 | 18.6 | 3.0 | 0.3 | 3.9  | 0.0 | 1.4 | 0.3661478 | 273.5  | 3.8  | 271.8  | 9.2  | 256.8  | 82.8  | -6.5   |
| Spot 68 | 194  | 5571.9   | 1.9 | 16.9 | 3.6 | 0.3 | 4.3  | 0.0 | 2.3 | 0.5349891 | 264.2  | 6.0  | 290.5  | 10.9 | 507.7  | 80.2  | 48.0   |
| Spot 69 | 667  | 11028.6  | 1.5 | 19.9 | 1.4 | 0.3 | 2.4  | 0.0 | 1.9 | 0.7790039 | 272.7  | 4.9  | 262.9  | 5.5  | 176.4  | 34.8  | -54.6  |
| Spot 70 | 133  | 22664.7  | 2.9 | 17.8 | 4.4 | 0.4 | 5.2  | 0.0 | 2.8 | 0.5396684 | 312.5  | 8.5  | 330.8  | 14.6 | 462.1  | 96.5  | 32.4   |
| Spot 71 | 200  | 18655.4  | 2.7 | 12.4 | 1.0 | 2.3 | 1.8  | 0.2 | 1.4 | 0.8175347 | 1216.4 | 16.1 | 1218.4 | 12.6 | 1222.0 | 20.0  | 0.5    |
| Spot 72 | 520  | 5853.4   | 3.1 | 19.0 | 1.5 | 0.3 | 2.5  | 0.0 | 1.8 | 0.7394258 | 233.5  | 4.2  | 233.8  | 5.2  | 237.4  | 38.7  | 1.6    |
| Spot 73 | 103  | 1705.6   | 1.1 | 18.9 | 4.5 | 0.2 | 6.6  | 0.0 | 4.8 | 0.7264974 | 186.4  | 8.8  | 169.6  | 10.3 | NA     | NA    |        |
| Spot 74 | 309  | 28526.3  | 3.0 | 12.6 | 1.1 | 2.2 | 1.9  | 0.2 | 1.5 | 0.8082002 | 1164.0 | 16.4 | 1176.5 | 13.3 | 1199.7 | 22.1  | 3.0    |
| Spot 75 | 576  | 19705.9  | 9.8 | 18.3 | 1.6 | 0.3 | 2.5  | 0.0 | 1.9 | 0.7738739 | 232.3  | 4.4  | 247.3  | 5.5  | 391.8  | 35.8  | 40.7   |
| Spot 77 | 545  | 4669.8   | 1.9 | 20.3 | 2.3 | 0.2 | 4.0  | 0.0 | 2.4 | 0.5887745 | 149.0  | 3.5  | 142.3  | 5.4  | 32.1   | NA    | -364.2 |
| Spot 78 | 160  | 1091.8   | 0.7 | 17.9 | 4.7 | 0.2 | 6.5  | 0.0 | 4.3 | 0.6672596 | 197.8  | 8.4  | 172.1  | 10.2 | NA     | NA    |        |
| Spot 79 | 656  | 17674.6  | 2.5 | 18.9 | 2.4 | 0.4 | 6.3  | 0.0 | 5.8 | 0.9235056 | 309.7  | 17.7 | 311.0  | 17.0 | 320.6  | 55.2  | 3.4    |
| Spot 80 | 302  | 2509.3   | 2.8 | 18.3 | 3.2 | 0.2 | 7.7  | 0.0 | 6.0 | 0.7801915 | 165.6  | 9.8  | 166.2  | 11.7 | 173.8  | 111.8 | 4.7    |

|          |      |          |      |      |     |     |      |     |     |           |        |      |        |      |        |       |        |
|----------|------|----------|------|------|-----|-----|------|-----|-----|-----------|--------|------|--------|------|--------|-------|--------|
| Spot 81  | 155  | 33624.6  | 1.0  | 18.1 | 4.3 | 0.2 | 4.6  | 0.0 | 1.4 | 0.3088289 | 190.3  | 2.6  | 210.0  | 8.6  | 437.6  | 96.4  | 56.5   |
| Spot 82  | 106  | 1097.3   | 1.3  | 18.2 | 4.7 | 0.2 | 10.1 | 0.0 | 3.4 | 0.3397036 | 189.6  | 6.4  | 161.6  | 15.0 | NA     | NA    |        |
| Spot 83  | 376  | 100709.1 | 2.5  | 12.1 | 1.0 | 2.4 | 1.8  | 0.2 | 1.5 | 0.8168184 | 1223.2 | 16.3 | 1246.1 | 12.9 | 1285.8 | 20.2  | 4.9    |
| Spot 84  | 195  | 3671.7   | 1.3  | 18.0 | 3.9 | 0.3 | 4.4  | 0.0 | 2.0 | 0.4464565 | 279.4  | 5.3  | 282.1  | 10.8 | 304.5  | 89.1  | 8.2    |
| Spot 85  | 96   | 13671.9  | 3.0  | 14.0 | 1.7 | 1.6 | 2.6  | 0.2 | 1.9 | 0.7320824 | 977.3  | 17.0 | 976.6  | 16.0 | 974.9  | 35.5  | -0.2   |
| Spot 86  | 322  | 40235.4  | 2.9  | 12.4 | 0.9 | 2.4 | 1.8  | 0.2 | 1.6 | 0.8652743 | 1220.8 | 17.3 | 1228.0 | 12.8 | 1240.8 | 17.6  | 1.6    |
| Spot 87  | 266  | 12994.8  | 1.8  | 19.6 | 1.7 | 0.3 | 2.6  | 0.0 | 2.0 | 0.7552924 | 286.1  | 5.5  | 280.1  | 6.4  | 230.3  | 39.6  | -24.2  |
| Spot 88  | 440  | 9287.2   | 1.7  | 18.7 | 2.3 | 0.3 | 2.7  | 0.0 | 1.3 | 0.4721798 | 280.4  | 3.5  | 284.4  | 6.7  | 316.9  | 54.1  | 11.5   |
| Spot 89  | 248  | 37167.4  | 1.6  | 9.7  | 0.9 | 4.1 | 1.8  | 0.3 | 1.6 | 0.8677846 | 1619.6 | 22.7 | 1658.6 | 14.9 | 1708.4 | 16.7  | 5.2    |
| Spot 90  | 133  | 5232.9   | 3.2  | 13.6 | 1.0 | 1.5 | 2.0  | 0.2 | 1.6 | 0.8057143 | 921.8  | 14.1 | 940.4  | 12.5 | 984.3  | 24.6  | 6.4    |
| Spot 91  | 127  | 26822.3  | 0.7  | 11.8 | 1.0 | 2.7 | 2.3  | 0.2 | 2.0 | 0.8866367 | 1348.5 | 24.6 | 1341.1 | 17.0 | 1329.3 | 20.4  | -1.4   |
| Spot 92  | 197  | 24748.9  | 0.9  | 12.9 | 1.0 | 2.2 | 1.5  | 0.2 | 1.2 | 0.7738979 | 1195.1 | 12.9 | 1179.9 | 10.7 | 1152.0 | 19.2  | -3.7   |
| Spot 93  | 471  | 7265.5   | 1.8  | 19.0 | 2.1 | 0.3 | 2.6  | 0.0 | 1.4 | 0.5337096 | 270.5  | 3.7  | 270.3  | 6.2  | 268.5  | 50.6  | -0.7   |
| Spot 94  | 115  | 10562.4  | 3.2  | 14.4 | 1.5 | 1.5 | 2.9  | 0.2 | 2.4 | 0.8288927 | 934.5  | 20.8 | 927.9  | 17.6 | 912.2  | 33.3  | -2.4   |
| Spot 96  | 527  | 7301.9   | 1.5  | 19.0 | 1.2 | 0.3 | 2.7  | 0.0 | 1.8 | 0.640422  | 267.4  | 4.6  | 267.0  | 6.4  | 264.0  | 48.2  | -1.3   |
| Spot 97  | 1649 | 3953.1   | 8.0  | 20.0 | 3.3 | 0.1 | 6.0  | 0.0 | 3.0 | 0.5085451 | 70.6   | 2.1  | 70.1   | 4.0  | 54.7   | NA    | -29.1  |
| Spot 98  | 385  | 5008.9   | 1.9  | 18.9 | 2.0 | 0.3 | 3.5  | 0.0 | 1.9 | 0.5320433 | 266.7  | 4.9  | 263.6  | 8.1  | 236.7  | 68.4  | -12.7  |
| Spot 99  | 105  | 20139.2  | 2.6  | 14.1 | 1.3 | 1.5 | 2.1  | 0.2 | 1.7 | 0.8025981 | 919.0  | 14.6 | 933.3  | 13.0 | 967.3  | 25.9  | 5.0    |
| Spot 102 | 36   | 1622.4   | 2.0  | 12.7 | 3.1 | 1.5 | 5.6  | 0.2 | 2.4 | 0.4358757 | 917.2  | 20.9 | 927.5  | 34.1 | 952.2  | 103.3 | 3.7    |
| Spot 103 | 303  | 6914.6   | 7.2  | 17.5 | 2.3 | 0.7 | 3.5  | 0.1 | 2.6 | 0.7437338 | 539.8  | 13.4 | 523.2  | 14.2 | 451.2  | 51.7  | -19.7  |
| Spot 105 | 144  | 3815.6   | 1.0  | 16.4 | 1.5 | 0.8 | 2.1  | 0.1 | 1.4 | 0.6589232 | 623.6  | 8.2  | 604.4  | 9.5  | 532.9  | 34.3  | -17.0  |
| Spot 106 | 88   | 25135.2  | 3.1  | 13.9 | 1.0 | 1.5 | 1.4  | 0.1 | 1.0 | 0.7038354 | 889.9  | 8.5  | 923.4  | 8.8  | 1004.3 | 20.9  | 11.4   |
| Spot 108 | 325  | 176116.9 | 2.7  | 11.8 | 0.9 | 2.5 | 1.6  | 0.2 | 1.3 | 0.8258402 | 1226.3 | 14.7 | 1267.5 | 11.5 | 1338.1 | 17.3  | 8.4    |
| Spot 111 | 75   | 22444.2  | 3.7  | 12.8 | 1.9 | 2.0 | 2.4  | 0.2 | 1.4 | 0.5942042 | 1081.9 | 14.0 | 1112.1 | 16.0 | 1171.8 | 37.6  | 7.7    |
| Spot 112 | 82   | 7288.8   | 0.8  | 8.8  | 1.3 | 5.0 | 1.9  | 0.3 | 1.3 | 0.7070142 | 1768.0 | 20.7 | 1811.6 | 16.0 | 1862.1 | 24.1  | 5.1    |
| Spot 113 | 77   | 11915.7  | 1.5  | 12.6 | 1.3 | 1.9 | 2.2  | 0.2 | 1.7 | 0.8064821 | 1015.8 | 16.4 | 1070.9 | 14.3 | 1185.0 | 25.3  | 14.3   |
| Spot 114 | 162  | 1222.9   | 2.3  | 20.7 | 4.0 | 0.1 | 10.3 | 0.0 | 4.1 | 0.3952724 | 128.3  | 5.2  | 98.5   | 9.7  | NA     | NA    |        |
| Spot 115 | 377  | 19879.5  | 0.9  | 19.1 | 2.7 | 0.3 | 4.3  | 0.0 | 3.3 | 0.7661873 | 270.7  | 8.6  | 274.5  | 10.2 | 307.0  | 62.3  | 11.8   |
| Spot 116 | 115  | 15544.1  | 3.3  | 7.6  | 0.9 | 7.1 | 2.4  | 0.4 | 2.3 | 0.9347099 | 2109.9 | 40.7 | 2127.2 | 21.6 | 2144.0 | 15.0  | 1.6    |
| Spot 117 | 479  | 9356.5   | 2.4  | 19.7 | 1.9 | 0.3 | 2.5  | 0.0 | 1.3 | 0.5337747 | 248.8  | 3.3  | 243.1  | 5.5  | 188.9  | 49.8  | -31.7  |
| Spot 118 | 1286 | 69052.4  | 55.7 | 16.2 | 1.2 | 0.8 | 2.4  | 0.1 | 2.1 | 0.8588357 | 602.1  | 11.9 | 622.1  | 11.2 | 695.4  | 26.3  | 13.4   |
| Spot 119 | 535  | 10217.6  | 2.2  | 19.8 | 1.3 | 0.2 | 1.8  | 0.0 | 1.2 | 0.6734657 | 192.2  | 2.3  | 192.0  | 3.2  | 189.3  | 31.6  | -1.5   |
| Spot 122 | 1174 | 91661.1  | 31.8 | 14.3 | 0.8 | 1.4 | 1.6  | 0.1 | 1.4 | 0.8728879 | 885.0  | 11.8 | 904.3  | 9.8  | 951.6  | 16.3  | 7.0    |
| Spot 123 | 255  | 28096.9  | 0.7  | 11.4 | 1.2 | 3.1 | 2.0  | 0.2 | 1.6 | 0.7915799 | 1436.0 | 20.3 | 1423.2 | 15.2 | 1404.2 | 23.3  | -2.3   |
| Spot 126 | 404  | 4885.5   | 6.4  | 16.8 | 1.4 | 0.6 | 2.4  | 0.1 | 1.8 | 0.7386692 | 433.5  | 7.4  | 446.6  | 8.7  | 514.5  | 35.6  | 15.7   |
| Spot 127 | 451  | 23862.6  | 3.3  | 14.2 | 1.1 | 1.6 | 1.8  | 0.2 | 1.4 | 0.789033  | 970.9  | 13.0 | 969.8  | 11.4 | 967.1  | 23.0  | -0.4   |
| Spot 128 | 412  | 16669.1  | 1.1  | 19.0 | 1.4 | 0.3 | 2.2  | 0.0 | 1.6 | 0.7605683 | 286.2  | 4.6  | 290.1  | 5.5  | 321.4  | 31.9  | 10.9   |
| Spot 130 | 632  | 6237.8   | 1.1  | 30.0 | 1.0 | 0.3 | 1.4  | 0.1 | 0.9 | 0.638034  | 451.9  | 3.8  | 279.0  | 3.3  | NA     | NA    |        |
| Spot 132 | 174  | 1476.0   | 1.5  | 18.5 | 3.9 | 0.2 | 8.8  | 0.0 | 2.6 | 0.2984645 | 191.8  | 5.0  | 173.8  | 14.0 | NA     | NA    |        |
| Spot 133 | 268  | 41772.3  | 2.5  | 12.9 | 0.9 | 2.1 | 1.6  | 0.2 | 1.3 | 0.8143769 | 1151.1 | 13.7 | 1155.8 | 11.0 | 1164.7 | 18.4  | 1.2    |
| Spot 134 | 472  | 31842.2  | 2.5  | 21.3 | 0.9 | 0.3 | 1.5  | 0.1 | 1.2 | 0.7873474 | 321.8  | 3.8  | 292.7  | 3.9  | 66.8   | 22.4  | -381.7 |
| Spot 135 | 227  | 56786.5  | 1.6  | 19.3 | 2.6 | 0.3 | 3.6  | 0.0 | 2.6 | 0.7033123 | 287.3  | 7.2  | 289.5  | 9.1  | 308.0  | 58.8  | 6.7    |
| Spot 137 | 181  | 1505.1   | 1.2  | 17.9 | 4.4 | 0.2 | 5.9  | 0.0 | 3.7 | 0.6284116 | 177.4  | 6.5  | 168.7  | 9.2  | 48.8   | NA    | -263.9 |

|          |      |          |     |      |     |     |      |     |     |           |        |      |        |      |        |       |       |
|----------|------|----------|-----|------|-----|-----|------|-----|-----|-----------|--------|------|--------|------|--------|-------|-------|
| Spot 138 | 707  | 37555.8  | 1.6 | 19.4 | 1.0 | 0.3 | 1.7  | 0.0 | 1.4 | 0.8293974 | 282.7  | 4.0  | 283.7  | 4.3  | 291.7  | 22.1  | 3.1   |
| Spot 139 | 130  | 60955.4  | 1.9 | 13.9 | 1.6 | 1.6 | 2.1  | 0.2 | 1.4 | 0.6749114 | 924.1  | 12.3 | 951.7  | 13.0 | 1016.1 | 31.6  | 9.1   |
| Spot 140 | 577  | 32062.4  | 5.7 | 12.5 | 0.9 | 2.3 | 2.1  | 0.2 | 1.9 | 0.9055783 | 1188.5 | 21.0 | 1206.2 | 15.1 | 1238.1 | 17.8  | 4.0   |
| Spot 141 | 479  | 428111.5 | 8.7 | 12.4 | 0.7 | 2.4 | 2.0  | 0.2 | 1.9 | 0.9339037 | 1227.2 | 20.7 | 1240.3 | 14.2 | 1263.2 | 13.9  | 2.9   |
| Spot 142 | 429  | 4150.2   | 1.6 | 18.9 | 2.6 | 0.3 | 3.3  | 0.0 | 2.0 | 0.6143159 | 279.2  | 5.6  | 272.8  | 8.0  | 217.6  | 60.8  | -28.3 |
| Spot 143 | 101  | 3816.5   | 2.6 | 13.9 | 1.8 | 1.4 | 3.0  | 0.1 | 1.3 | 0.446409  | 880.7  | 10.8 | 891.5  | 17.5 | 918.5  | 54.3  | 4.1   |
| Spot 144 | 114  | 55089.6  | 4.0 | 12.2 | 1.0 | 2.4 | 1.7  | 0.2 | 1.3 | 0.7971413 | 1208.1 | 14.8 | 1232.0 | 12.0 | 1274.0 | 19.8  | 5.2   |
| Spot 145 | 89   | 8282.9   | 2.7 | 11.6 | 1.4 | 2.5 | 1.9  | 0.2 | 1.2 | 0.6343836 | 1242.7 | 13.3 | 1278.3 | 13.5 | 1338.7 | 27.7  | 7.2   |
| Spot 146 | 136  | 4064.4   | 2.6 | 16.1 | 4.3 | 0.4 | 4.9  | 0.0 | 2.2 | 0.4484796 | 269.0  | 5.8  | 305.0  | 12.9 | 590.7  | 94.8  | 54.5  |
| Spot 148 | 161  | 37476.9  | 1.9 | 14.0 | 1.2 | 1.5 | 3.1  | 0.1 | 2.8 | 0.9134558 | 896.8  | 23.4 | 926.7  | 18.6 | 998.4  | 25.3  | 10.2  |
| Spot 149 | 463  | 38422.9  | 1.7 | 19.7 | 1.9 | 0.2 | 2.5  | 0.0 | 1.6 | 0.6388027 | 163.6  | 2.6  | 170.5  | 3.9  | 267.5  | 44.0  | 38.8  |
| Spot 151 | 66   | 4833.6   | 1.4 | 16.2 | 5.2 | 0.3 | 5.9  | 0.0 | 2.4 | 0.4012318 | 208.6  | 4.9  | 244.8  | 12.9 | 607.6  | 117.2 | 65.7  |
| Spot 152 | 254  | 2910.5   | 3.4 | 18.6 | 4.0 | 0.1 | 4.9  | 0.0 | 2.4 | 0.4834846 | 69.8   | 1.7  | 72.9   | 3.5  | 178.9  | 100.8 | 61.0  |
| Spot 153 | 368  | 90910.1  | 2.6 | 12.6 | 1.1 | 2.1 | 1.8  | 0.2 | 1.4 | 0.7876225 | 1105.4 | 14.4 | 1142.8 | 12.3 | 1214.3 | 21.8  | 9.0   |
| Spot 154 | 142  | 3883.2   | 1.1 | 19.1 | 3.0 | 0.2 | 5.8  | 0.0 | 3.1 | 0.5390475 | 183.1  | 5.7  | 182.6  | 9.8  | 175.2  | 114.9 | -4.5  |
| Spot 155 | 671  | 16200.0  | 1.1 | 18.0 | 2.3 | 0.3 | 2.5  | 0.0 | 1.0 | 0.3902976 | 281.8  | 2.7  | 299.6  | 6.6  | 440.8  | 51.9  | 36.1  |
| Spot 156 | 391  | 36252.8  | 4.6 | 12.8 | 1.7 | 2.2 | 3.0  | 0.2 | 2.4 | 0.8113649 | 1203.7 | 26.3 | 1196.6 | 20.7 | 1183.7 | 34.1  | -1.7  |
| Spot 157 | 852  | 176158.3 | 3.7 | 12.6 | 1.2 | 2.4 | 2.0  | 0.2 | 1.6 | 0.7998865 | 1242.5 | 17.9 | 1234.4 | 14.1 | 1220.4 | 23.3  | -1.8  |
| Spot 158 | 87   | 1385.5   | 1.2 | 18.0 | 4.8 | 0.2 | 12.9 | 0.0 | 3.8 | 0.2952726 | 194.4  | 7.3  | 180.1  | 21.3 | NA     | NA    |       |
| Spot 159 | 555  | 46894.2  | 2.1 | 19.5 | 1.1 | 0.3 | 2.1  | 0.0 | 1.8 | 0.8483048 | 292.6  | 5.2  | 292.0  | 5.4  | 287.2  | 25.9  | -1.9  |
| Spot 160 | 157  | 1758.5   | 2.0 | 17.6 | 4.5 | 0.2 | 5.5  | 0.0 | 3.0 | 0.5488594 | 193.3  | 5.7  | 192.3  | 9.6  | 179.9  | 106.6 | -7.5  |
| Spot 161 | 171  | 3231.8   | 0.9 | 20.4 | 2.7 | 0.2 | 6.0  | 0.0 | 2.5 | 0.4128344 | 191.9  | 4.7  | 176.5  | 9.8  | NA     | NA    |       |
| Spot 162 | 234  | 32461.1  | 1.9 | 11.7 | 0.9 | 2.9 | 1.7  | 0.2 | 1.4 | 0.8313715 | 1400.9 | 18.0 | 1384.6 | 13.0 | 1359.6 | 18.4  | -3.0  |
| Spot 164 | 180  | 4071.3   | 2.1 | 12.7 | 1.3 | 2.0 | 1.8  | 0.2 | 1.3 | 0.705382  | 1103.7 | 13.0 | 1109.6 | 12.3 | 1121.3 | 25.8  | 1.6   |
| Spot 165 | 499  | 191099.7 | 3.0 | 11.7 | 1.0 | 2.6 | 1.9  | 0.2 | 1.5 | 0.8333998 | 1277.1 | 17.9 | 1310.5 | 13.6 | 1365.5 | 19.7  | 6.5   |
| Spot 166 | 276  | 39094.4  | 1.2 | 10.6 | 1.2 | 3.4 | 2.1  | 0.3 | 1.7 | 0.8096587 | 1465.6 | 22.3 | 1499.6 | 16.5 | 1547.9 | 23.2  | 5.3   |
| Spot 167 | 325  | 32598.0  | 1.4 | 12.7 | 1.1 | 2.2 | 1.8  | 0.2 | 1.4 | 0.7828579 | 1185.6 | 15.3 | 1188.7 | 12.7 | 1194.2 | 22.2  | 0.7   |
| Spot 168 | 563  | 7114.5   | 1.2 | 18.9 | 1.5 | 0.3 | 2.2  | 0.0 | 1.4 | 0.6398426 | 272.9  | 3.7  | 272.5  | 5.2  | 269.2  | 38.5  | -1.4  |
| Spot 169 | 136  | 19832.2  | 3.0 | 14.4 | 1.5 | 1.5 | 2.3  | 0.2 | 1.6 | 0.7214924 | 952.1  | 14.4 | 945.4  | 13.9 | 929.9  | 32.2  | -2.4  |
| Spot 170 | 199  | 3907.5   | 1.6 | 18.9 | 1.7 | 0.3 | 2.5  | 0.0 | 1.6 | 0.6419937 | 279.7  | 4.5  | 271.2  | 6.1  | 198.4  | 45.4  | -41.0 |
| Spot 172 | 97   | 31418.9  | 3.1 | 14.2 | 2.3 | 1.6 | 4.1  | 0.2 | 3.3 | 0.815507  | 955.9  | 29.4 | 956.7  | 25.1 | 958.3  | 48.0  | 0.3   |
| Spot 174 | 227  | 8062.9   | 6.8 | 13.7 | 1.0 | 1.6 | 1.8  | 0.2 | 1.3 | 0.7118026 | 981.6  | 11.6 | 989.0  | 11.3 | 1005.3 | 25.5  | 2.4   |
| Spot 175 | 353  | 3572.9   | 0.9 | 19.5 | 2.4 | 0.2 | 4.5  | 0.0 | 1.8 | 0.3892866 | 178.1  | 3.1  | 173.0  | 7.2  | 103.7  | 98.6  | -71.7 |
| Spot 176 | 173  | 57776.9  | 0.8 | 12.7 | 0.8 | 2.1 | 1.5  | 0.2 | 1.3 | 0.8487068 | 1137.2 | 13.1 | 1158.2 | 10.2 | 1197.6 | 15.5  | 5.0   |
| Spot 177 | 389  | 14983.5  | 1.8 | 20.3 | 2.3 | 0.2 | 6.1  | 0.0 | 5.6 | 0.9278973 | 168.5  | 9.4  | 167.4  | 9.4  | 151.9  | 53.1  | -10.9 |
| Spot 178 | 1067 | 8421.4   | 2.7 | 19.1 | 1.4 | 0.3 | 2.1  | 0.0 | 1.6 | 0.7410761 | 249.7  | 3.9  | 250.7  | 4.7  | 259.9  | 33.0  | 3.9   |
| Spot 179 | 352  | 7690.5   | 1.6 | 19.5 | 1.5 | 0.3 | 2.8  | 0.0 | 1.6 | 0.5936463 | 274.5  | 4.4  | 267.3  | 6.5  | 204.0  | 51.6  | -34.6 |
| Spot 180 | 83   | 19353.7  | 2.9 | 14.6 | 3.3 | 1.4 | 6.8  | 0.2 | 5.9 | 0.8735591 | 903.3  | 50.0 | 898.7  | 40.6 | 887.6  | 68.4  | -1.8  |
| Spot 181 | 288  | 419555.7 | 6.0 | 11.1 | 1.2 | 3.1 | 2.0  | 0.2 | 1.7 | 0.8207621 | 1431.5 | 21.3 | 1438.6 | 15.5 | 1449.1 | 22.0  | 1.2   |
| Spot 183 | 367  | 64578.3  | 2.9 | 13.8 | 0.9 | 1.8 | 1.8  | 0.2 | 1.6 | 0.8596867 | 1077.6 | 15.5 | 1062.6 | 11.9 | 1032.0 | 18.7  | -4.4  |
| Spot 184 | 511  | 31066.0  | 2.7 | 13.8 | 0.7 | 1.8 | 1.6  | 0.2 | 1.4 | 0.8858602 | 1030.2 | 13.4 | 1027.9 | 10.3 | 1022.9 | 14.9  | -0.7  |
| Spot 185 | 248  | 18482.1  | 5.5 | 13.9 | 0.9 | 1.7 | 1.5  | 0.2 | 1.2 | 0.7980407 | 1000.0 | 11.1 | 995.2  | 9.6  | 984.5  | 18.5  | -1.6  |
| Spot 186 | 50   | 2374.1   | 2.7 | 13.4 | 3.3 | 1.3 | 5.0  | 0.1 | 2.6 | 0.5260333 | 808.4  | 20.0 | 835.4  | 28.5 | 908.0  | 87.8  | 11.0  |

|          |      |          |      |      |     |     |      |     |     |           |        |      |        |      |        |       |        |
|----------|------|----------|------|------|-----|-----|------|-----|-----|-----------|--------|------|--------|------|--------|-------|--------|
| Spot 187 | 290  | 11980.8  | 2.5  | 12.7 | 0.8 | 2.2 | 1.7  | 0.2 | 1.5 | 0.8840401 | 1186.2 | 16.3 | 1175.3 | 11.8 | 1155.3 | 15.8  | -2.7   |
| Spot 188 | 1086 | 29015.1  | 15.9 | 19.7 | 1.0 | 0.3 | 1.7  | 0.0 | 1.4 | 0.8056584 | 238.7  | 3.2  | 238.2  | 3.6  | 232.8  | 23.5  | -2.6   |
| Spot 189 | 1759 | 40975.7  | 0.6  | 19.2 | 0.9 | 0.3 | 2.0  | 0.0 | 1.8 | 0.8926322 | 277.2  | 4.8  | 280.5  | 4.9  | 307.7  | 20.4  | 9.9    |
| Spot 190 | 277  | 24540.3  | 21.2 | 13.5 | 1.0 | 1.7 | 1.5  | 0.2 | 1.1 | 0.7352175 | 1017.3 | 10.6 | 1026.5 | 9.9  | 1046.1 | 21.0  | 2.8    |
| Spot 191 | 125  | 19649.1  | 3.0  | 14.4 | 2.0 | 1.4 | 3.5  | 0.1 | 2.9 | 0.8219159 | 889.0  | 24.1 | 896.2  | 21.0 | 914.1  | 41.4  | 2.7    |
| Spot 193 | 145  | 30864.6  | 2.2  | 12.8 | 1.2 | 2.2 | 1.8  | 0.2 | 1.4 | 0.7571028 | 1178.2 | 14.8 | 1172.9 | 12.7 | 1163.0 | 23.6  | -1.3   |
| Spot 194 | 118  | 12342.0  | 1.5  | 12.6 | 1.5 | 2.1 | 1.9  | 0.2 | 1.2 | 0.6276561 | 1133.6 | 12.3 | 1146.8 | 13.0 | 1172.1 | 29.1  | 3.3    |
| Spot 195 | 730  | 272150.6 | 2.6  | 13.7 | 0.9 | 1.8 | 1.5  | 0.2 | 1.2 | 0.8135016 | 1027.2 | 11.8 | 1028.9 | 9.9  | 1032.6 | 18.0  | 0.5    |
| Spot 196 | 145  | 19444.8  | 3.2  | 12.2 | 1.0 | 2.4 | 1.7  | 0.2 | 1.4 | 0.8187466 | 1231.8 | 15.7 | 1235.8 | 12.2 | 1242.7 | 19.2  | 0.9    |
| Spot 197 | 234  | 245698.8 | 2.4  | 16.6 | 1.1 | 0.8 | 1.5  | 0.1 | 1.0 | 0.6987124 | 617.8  | 6.2  | 620.6  | 7.0  | 630.8  | 23.1  | 2.1    |
| Spot 198 | 195  | 20166.7  | 2.9  | 12.4 | 0.9 | 2.4 | 1.8  | 0.2 | 1.5 | 0.8575047 | 1232.9 | 17.3 | 1229.3 | 12.8 | 1223.0 | 18.2  | -0.8   |
| Spot 199 | 414  | 4944.4   | 1.3  | 8.9  | 1.0 | 4.7 | 2.7  | 0.3 | 2.2 | 0.8071125 | 1733.5 | 33.3 | 1766.2 | 22.7 | 1805.1 | 29.2  | 4.0    |
| Spot 200 | 74   | 2093.4   | 1.8  | 15.4 | 5.4 | 0.2 | 6.8  | 0.0 | 4.1 | 0.601402  | 186.7  | 7.5  | 215.2  | 13.1 | 540.5  | 118.1 | 65.5   |
| Spot 203 | 252  | 24064.8  | 3.0  | 11.8 | 0.9 | 2.8 | 1.7  | 0.2 | 1.5 | 0.8486631 | 1382.0 | 18.3 | 1357.7 | 13.0 | 1319.7 | 17.7  | -4.7   |
| Spot 204 | 149  | 2709.9   | 1.1  | 16.4 | 4.9 | 0.4 | 5.4  | 0.0 | 2.1 | 0.3969701 | 295.2  | 6.2  | 314.7  | 14.6 | 461.6  | 110.1 | 36.0   |
| Spot 205 | 110  | 1044.1   | 3.1  | 17.6 | 2.5 | 0.4 | 4.2  | 0.1 | 2.9 | 0.6825847 | 405.0  | 11.2 | 329.0  | 11.8 | NA     | NA    |        |
| Spot 206 | 529  | 24916.2  | 1.7  | 19.3 | 1.4 | 0.3 | 1.8  | 0.0 | 1.1 | 0.616576  | 267.9  | 2.9  | 267.4  | 4.2  | 263.1  | 32.5  | -1.8   |
| Spot 207 | 460  | 100847.4 | 1.6  | 14.2 | 3.2 | 1.6 | 4.8  | 0.2 | 3.6 | 0.754018  | 993.8  | 33.4 | 980.7  | 30.3 | 951.5  | 64.6  | -4.4   |
| Spot 208 | 313  | 3231.3   | 1.3  | 19.0 | 2.1 | 0.3 | 3.0  | 0.0 | 2.0 | 0.6727846 | 300.5  | 5.9  | 280.8  | 7.3  | 119.5  | 52.1  | -151.5 |
| Spot 210 | 55   | 923.5    | 2.5  | 19.0 | 4.4 | 0.2 | 10.2 | 0.0 | 4.1 | 0.4047234 | 275.8  | 11.1 | 203.0  | 18.8 | NA     | NA    |        |
| Spot 211 | 177  | 1059.7   | 2.0  | 20.2 | 2.6 | 0.2 | 3.6  | 0.0 | 1.8 | 0.4926727 | 242.6  | 4.2  | 176.0  | 5.8  | NA     | NA    |        |
| Spot 212 | 273  | 7566.4   | 2.6  | 17.2 | 1.1 | 0.7 | 1.7  | 0.1 | 1.2 | 0.7235914 | 541.6  | 6.4  | 529.2  | 7.0  | 476.1  | 26.0  | -13.8  |
| Spot 214 | 602  | 147864.3 | 4.2  | 12.3 | 1.6 | 2.2 | 2.2  | 0.2 | 1.4 | 0.6617321 | 1160.1 | 15.2 | 1187.8 | 15.1 | 1238.6 | 31.8  | 6.3    |
| Spot 215 | 337  | 149192.6 | 1.6  | 16.9 | 1.2 | 0.9 | 1.9  | 0.1 | 1.5 | 0.7823067 | 641.2  | 9.2  | 630.7  | 9.0  | 593.2  | 26.0  | -8.1   |
| Spot 217 | 166  | 2685.1   | 0.9  | 18.7 | 3.4 | 0.2 | 4.6  | 0.0 | 2.2 | 0.4810001 | 186.6  | 4.1  | 181.8  | 7.7  | 120.1  | 96.1  | -55.4  |
| Spot 218 | 207  | 2446.1   | 1.1  | 19.0 | 3.3 | 0.2 | 4.8  | 0.0 | 3.0 | 0.6341974 | 197.7  | 5.9  | 186.8  | 8.1  | 50.8   | NA    | -289.5 |
| Spot 219 | 633  | 84035.9  | 2.3  | 19.9 | 1.1 | 0.3 | 1.8  | 0.0 | 1.4 | 0.7769872 | 233.1  | 3.2  | 232.0  | 3.8  | 220.5  | 26.4  | -5.7   |
| Spot 220 | 125  | 17017.0  | 2.8  | 14.2 | 1.5 | 1.5 | 2.2  | 0.2 | 1.6 | 0.7229967 | 938.4  | 13.6 | 938.6  | 13.2 | 939.0  | 30.6  | 0.1    |
| Spot 221 | 298  | 44914.9  | 3.0  | 20.3 | 2.3 | 0.1 | 3.1  | 0.0 | 2.0 | 0.6533021 | 98.3   | 2.0  | 101.1  | 3.0  | 166.5  | 54.6  | 41.0   |
| Spot 222 | 314  | 81883.8  | 0.9  | 13.7 | 1.3 | 1.8 | 2.0  | 0.2 | 1.5 | 0.7504299 | 1063.8 | 14.8 | 1052.6 | 13.2 | 1029.5 | 27.0  | -3.3   |
| Spot 223 | 366  | 16500.7  | 2.9  | 13.0 | 1.0 | 2.1 | 1.8  | 0.2 | 1.4 | 0.8004761 | 1151.1 | 14.9 | 1136.3 | 12.1 | 1108.0 | 21.2  | -3.9   |
| Spot 225 | 471  | 34381.0  | 1.9  | 14.2 | 0.9 | 1.5 | 1.5  | 0.2 | 1.2 | 0.8242564 | 918.9  | 10.7 | 925.0  | 9.2  | 939.6  | 17.5  | 2.2    |
| Spot 226 | 452  | 35683.6  | 1.9  | 18.9 | 1.3 | 0.3 | 1.9  | 0.0 | 1.3 | 0.7057014 | 271.4  | 3.5  | 277.5  | 4.5  | 329.5  | 30.1  | 17.6   |
| Spot 227 | 361  | 3264.1   | 0.7  | 20.2 | 2.6 | 0.2 | 5.1  | 0.0 | 3.1 | 0.6202179 | 204.8  | 6.4  | 187.2  | 8.7  | NA     | NA    |        |
| Spot 228 | 419  | 2015.6   | 1.7  | 20.3 | 3.4 | 0.1 | 4.9  | 0.0 | 1.8 | 0.3705586 | 55.2   | 1.0  | 49.7   | 2.4  | NA     | NA    |        |
| Spot 229 | 51   | 11594.2  | 3.9  | 11.9 | 1.5 | 2.2 | 2.4  | 0.2 | 1.9 | 0.7656316 | 1111.9 | 19.0 | 1172.8 | 16.9 | 1287.1 | 30.4  | 13.6   |
| Spot 230 | 372  | 97654.7  | 1.0  | 19.3 | 2.1 | 0.3 | 2.6  | 0.0 | 1.6 | 0.6213302 | 282.7  | 4.5  | 283.3  | 6.5  | 288.2  | 47.1  | 1.9    |
| Spot 231 | 985  | 34683.5  | 8.6  | 16.6 | 1.2 | 0.8 | 1.9  | 0.1 | 1.5 | 0.7783593 | 596.9  | 8.3  | 600.6  | 8.5  | 614.6  | 25.4  | 2.9    |
| Spot 232 | 476  | 44230.8  | 3.6  | 11.5 | 0.9 | 2.9 | 1.3  | 0.2 | 0.9 | 0.7007019 | 1406.4 | 11.6 | 1393.5 | 10.0 | 1373.9 | 18.0  | -2.4   |
| Spot 233 | 340  | 45181.6  | 3.0  | 11.4 | 1.1 | 2.7 | 3.5  | 0.2 | 3.3 | 0.9512843 | 1298.6 | 38.9 | 1333.1 | 25.8 | 1389.1 | 20.6  | 6.5    |
| Spot 234 | 1236 | 17414.3  | 0.8  | 19.2 | 1.4 | 0.3 | 1.9  | 0.0 | 1.3 | 0.6747184 | 270.4  | 3.4  | 270.7  | 4.5  | 273.1  | 32.3  | 1.0    |
| Spot 235 | 87   | 31611.7  | 4.1  | 14.4 | 2.5 | 1.5 | 4.1  | 0.2 | 3.3 | 0.7911204 | 927.7  | 28.3 | 926.0  | 25.2 | 922.1  | 52.1  | -0.6   |
| Spot 236 | 246  | 21777.1  | 1.9  | 13.7 | 1.4 | 1.8 | 1.9  | 0.2 | 1.2 | 0.6638402 | 1039.6 | 11.9 | 1032.4 | 12.1 | 1017.4 | 28.4  | -2.2   |

|          |      |          |      |      |     |     |     |     |     |           |        |      |        |      |        |       |        |
|----------|------|----------|------|------|-----|-----|-----|-----|-----|-----------|--------|------|--------|------|--------|-------|--------|
| Spot 238 | 116  | 16839.0  | 1.9  | 12.6 | 1.3 | 2.2 | 2.0 | 0.2 | 1.5 | 0.7441991 | 1203.2 | 16.5 | 1194.6 | 14.2 | 1179.2 | 26.8  | -2.0   |
| Spot 239 | 313  | 20328.6  | 3.5  | 13.8 | 1.0 | 1.7 | 1.9 | 0.2 | 1.6 | 0.8255395 | 995.4  | 14.4 | 999.2  | 12.0 | 1007.7 | 21.6  | 1.2    |
| Spot 240 | 80   | 9639.8   | 2.7  | 12.5 | 1.5 | 2.2 | 2.4 | 0.2 | 1.9 | 0.7830877 | 1171.5 | 20.4 | 1175.6 | 17.0 | 1183.2 | 30.0  | 1.0    |
| Spot 241 | 44   | 2499.6   | 1.1  | 11.7 | 2.7 | 2.2 | 3.4 | 0.2 | 2.0 | 0.5752474 | 1139.2 | 20.5 | 1168.6 | 23.7 | 1223.6 | 54.8  | 6.9    |
| Spot 242 | 258  | 39728.4  | 16.8 | 12.3 | 0.8 | 2.4 | 1.7 | 0.2 | 1.5 | 0.8853459 | 1258.0 | 17.1 | 1251.6 | 12.2 | 1240.6 | 15.4  | -1.4   |
| Spot 243 | 61   | 11755.8  | 2.6  | 14.7 | 2.4 | 1.3 | 4.7 | 0.1 | 4.0 | 0.8639448 | 869.3  | 32.9 | 865.4  | 27.3 | 855.7  | 48.9  | -1.6   |
| Spot 244 | 748  | 217454.0 | 3.3  | 14.2 | 0.7 | 1.5 | 1.2 | 0.2 | 1.0 | 0.8004279 | 937.7  | 8.7  | 943.3  | 7.7  | 956.3  | 15.3  | 1.9    |
| Spot 245 | 164  | 30422.6  | 2.8  | 12.3 | 1.6 | 2.2 | 2.2 | 0.2 | 1.6 | 0.7115666 | 1169.1 | 17.1 | 1191.5 | 15.8 | 1232.4 | 31.0  | 5.1    |
| Spot 247 | 396  | 37186.8  | 13.5 | 13.4 | 1.6 | 1.0 | 2.6 | 0.1 | 2.1 | 0.7980995 | 610.6  | 12.2 | 719.6  | 13.5 | 1076.3 | 31.7  | 43.3   |
| Spot 249 | 139  | 7477.1   | 1.0  | 14.9 | 4.6 | 0.4 | 5.3 | 0.0 | 2.7 | 0.5035821 | 308.8  | 8.1  | 375.4  | 16.7 | 810.1  | 96.5  | 61.9   |
| Spot 252 | 283  | 3035.5   | 1.7  | 18.9 | 1.8 | 0.3 | 3.3 | 0.0 | 1.5 | 0.4443756 | 277.6  | 4.0  | 262.1  | 7.6  | 125.2  | 69.2  | -121.8 |
| Spot 254 | 324  | 27251.1  | 3.8  | 11.1 | 0.8 | 3.2 | 1.4 | 0.3 | 1.2 | 0.8261255 | 1476.7 | 15.8 | 1463.6 | 11.2 | 1444.6 | 15.5  | -2.2   |
| Spot 255 | 381  | 3491.5   | 1.4  | 18.8 | 1.9 | 0.3 | 2.2 | 0.0 | 1.2 | 0.5250861 | 278.8  | 3.2  | 268.2  | 5.2  | 176.3  | 43.7  | -58.2  |
| Spot 256 | 718  | 15081.8  | 1.4  | 19.2 | 1.5 | 0.3 | 2.4 | 0.0 | 1.8 | 0.7402553 | 271.5  | 4.7  | 272.7  | 5.7  | 283.4  | 36.7  | 4.2    |
| Spot 258 | 894  | 11211.0  | 2.1  | 19.1 | 1.1 | 0.3 | 1.7 | 0.0 | 1.3 | 0.7432838 | 280.1  | 3.6  | 279.4  | 4.3  | 273.7  | 26.8  | -2.3   |
| Spot 259 | 795  | 44004.3  | 2.8  | 14.4 | 0.8 | 1.5 | 1.6 | 0.2 | 1.3 | 0.8387208 | 915.8  | 11.2 | 918.3  | 9.4  | 924.4  | 17.5  | 0.9    |
| Spot 260 | 881  | 868.5    | 0.9  | 20.0 | 2.3 | 0.0 | 3.7 | 0.0 | 1.5 | 0.3934154 | 54.4   | 0.8  | 38.5   | 1.4  | NA     | NA    |        |
| Spot 261 | 251  | 14177.0  | 1.7  | 10.2 | 0.8 | 3.8 | 1.8 | 0.3 | 1.6 | 0.8869635 | 1601.5 | 22.5 | 1596.7 | 14.4 | 1590.4 | 15.4  | -0.7   |
| Spot 262 | 627  | 3308.5   | 9.7  | 16.6 | 2.0 | 0.4 | 2.5 | 0.1 | 1.5 | 0.6154135 | 316.4  | 4.7  | 336.0  | 7.1  | 473.9  | 43.6  | 33.2   |
| Spot 263 | 703  | 9370.6   | 1.2  | 19.0 | 1.4 | 0.3 | 2.3 | 0.0 | 1.7 | 0.7334363 | 275.6  | 4.5  | 275.8  | 5.5  | 277.6  | 35.2  | 0.8    |
| Spot 264 | 299  | 937.5    | 3.0  | 19.4 | 3.8 | 0.1 | 5.5 | 0.0 | 2.6 | 0.4739124 | 81.7   | 2.1  | 62.5   | 3.3  | NA     | NA    |        |
| Spot 265 | 238  | 6473.0   | 4.0  | 13.6 | 1.2 | 1.7 | 1.9 | 0.2 | 1.5 | 0.7935853 | 1018.0 | 14.2 | 1013.3 | 12.2 | 1003.1 | 23.4  | -1.5   |
| Spot 266 | 598  | 22965.0  | 0.8  | 18.5 | 2.6 | 0.3 | 2.9 | 0.0 | 1.4 | 0.4643851 | 252.6  | 3.4  | 265.1  | 6.8  | 377.2  | 58.3  | 33.0   |
| Spot 267 | 126  | 18223.8  | 1.8  | 14.4 | 1.6 | 1.5 | 2.3 | 0.2 | 1.7 | 0.7116322 | 943.9  | 14.7 | 934.3  | 14.3 | 911.5  | 33.9  | -3.6   |
| Spot 269 | 217  | 5212.0   | 2.7  | 14.2 | 1.6 | 1.5 | 2.7 | 0.2 | 2.2 | 0.8029125 | 925.7  | 18.8 | 913.7  | 16.4 | 884.7  | 33.6  | -4.6   |
| Spot 270 | 1380 | 19417.8  | 15.1 | 19.9 | 0.9 | 0.3 | 1.3 | 0.0 | 0.9 | 0.683616  | 255.4  | 2.2  | 250.2  | 2.8  | 201.8  | 21.7  | -26.6  |
| Spot 271 | 275  | 4507.8   | 1.3  | 16.9 | 6.1 | 0.1 | 8.2 | 0.0 | 5.0 | 0.606723  | 61.9   | 3.1  | 73.8   | 5.8  | 480.0  | 143.9 | 87.1   |
| Spot 272 | 895  | 101004.5 | 0.8  | 19.0 | 2.2 | 0.3 | 3.5 | 0.0 | 2.7 | 0.7841998 | 282.9  | 7.5  | 289.5  | 8.8  | 342.4  | 48.8  | 17.4   |
| Spot 273 | 203  | 103476.2 | 3.7  | 12.7 | 1.0 | 2.2 | 1.6 | 0.2 | 1.2 | 0.7719671 | 1174.2 | 13.1 | 1179.9 | 11.0 | 1190.2 | 19.8  | 1.3    |
| Spot 274 | 576  | 45964.4  | 1.7  | 12.7 | 0.8 | 2.3 | 1.5 | 0.2 | 1.3 | 0.8447143 | 1215.6 | 14.1 | 1202.0 | 10.6 | 1177.6 | 15.9  | -3.2   |
| Spot 277 | 778  | 26135.3  | 2.6  | 17.5 | 0.8 | 0.6 | 1.6 | 0.1 | 1.3 | 0.8476666 | 496.2  | 6.4  | 498.9  | 6.2  | 511.2  | 18.4  | 2.9    |
| Spot 279 | 495  | 170322.8 | 4.0  | 12.5 | 0.8 | 2.2 | 1.6 | 0.2 | 1.4 | 0.8638653 | 1138.7 | 14.1 | 1166.4 | 10.8 | 1218.3 | 15.5  | 6.5    |
| Spot 280 | 632  | 2630.6   | 3.5  | 20.6 | 2.2 | 0.1 | 4.3 | 0.0 | 1.6 | 0.381203  | 69.4   | 1.1  | 63.7   | 2.6  | NA     | NA    |        |
| Spot 281 | 183  | 64827.4  | 3.2  | 11.5 | 1.1 | 2.8 | 1.7 | 0.2 | 1.3 | 0.7707378 | 1336.8 | 15.9 | 1352.0 | 12.8 | 1375.9 | 20.9  | 2.8    |
| Spot 282 | 207  | 58080.0  | 4.0  | 14.3 | 1.0 | 1.6 | 1.6 | 0.2 | 1.3 | 0.8027378 | 988.7  | 12.1 | 978.4  | 10.3 | 955.3  | 20.1  | -3.5   |
| Spot 283 | 515  | 26077.8  | 1.3  | 13.4 | 0.9 | 1.7 | 1.6 | 0.2 | 1.3 | 0.8073637 | 982.8  | 11.6 | 1010.2 | 10.0 | 1070.1 | 18.6  | 8.2    |
| Spot 285 | 215  | 35258.5  | 1.7  | 14.4 | 1.1 | 1.5 | 1.9 | 0.2 | 1.6 | 0.8054956 | 908.9  | 13.2 | 916.2  | 11.7 | 933.6  | 23.5  | 2.6    |
| Spot 286 | 95   | 33536.4  | 2.3  | 12.8 | 1.4 | 2.1 | 2.3 | 0.2 | 1.8 | 0.7795143 | 1138.4 | 18.6 | 1145.7 | 15.7 | 1159.7 | 28.3  | 1.8    |
| Spot 287 | 1109 | 11191.1  | 11.4 | 18.9 | 1.3 | 0.3 | 1.8 | 0.0 | 1.2 | 0.6867519 | 268.8  | 3.3  | 271.3  | 4.3  | 293.1  | 30.1  | 8.3    |
| Spot 288 | 89   | 10052.1  | 1.5  | 12.9 | 1.1 | 2.1 | 2.2 | 0.2 | 1.8 | 0.8019289 | 1155.6 | 18.6 | 1142.8 | 15.1 | 1118.5 | 26.1  | -3.3   |
| Spot 290 | 351  | 10570.2  | 2.9  | 12.6 | 1.1 | 2.2 | 1.7 | 0.2 | 1.2 | 0.7024445 | 1173.9 | 12.9 | 1170.3 | 11.9 | 1163.7 | 24.2  | -0.9   |
| Spot 292 | 310  | 13947.6  | 1.7  | 19.0 | 1.9 | 0.3 | 2.7 | 0.0 | 2.0 | 0.7293586 | 272.0  | 5.3  | 273.8  | 6.5  | 289.2  | 42.6  | 6.0    |
| Spot 293 | 345  | 53593.7  | 1.5  | 19.7 | 2.0 | 0.2 | 2.6 | 0.0 | 1.7 | 0.6434947 | 174.7  | 2.9  | 179.3  | 4.3  | 239.5  | 45.8  | 27.0   |

|                    |      |          |      |      |      |     |      |     |      |           |        |       |        |       |        |       |         |
|--------------------|------|----------|------|------|------|-----|------|-----|------|-----------|--------|-------|--------|-------|--------|-------|---------|
| Spot 294           | 156  | 9571.2   | 1.6  | 12.9 | 1.1  | 1.9 | 3.6  | 0.2 | 3.4  | 0.9470021 | 1077.9 | 33.7  | 1089.5 | 24.0  | 1112.9 | 23.0  | 3.1     |
| Spot 295           | 1060 | 54472.4  | 9.4  | 14.1 | 1.4  | 0.5 | 2.2  | 0.1 | 1.8  | 0.7909653 | 322.3  | 5.5   | 414.7  | 7.6   | 967.8  | 27.7  | 66.7    |
| Spot 296           | 195  | 4099.7   | 1.8  | 19.3 | 2.4  | 0.2 | 3.2  | 0.0 | 1.7  | 0.5271401 | 188.0  | 3.1   | 184.5  | 5.3   | 139.9  | 63.2  | -34.4   |
| Spot 297           | 617  | 66887.6  | 8.8  | 14.3 | 1.0  | 1.5 | 2.4  | 0.2 | 2.2  | 0.9166875 | 935.9  | 19.4  | 936.8  | 14.9  | 939.0  | 19.9  | 0.3     |
| Spot 298           | 615  | 182832.0 | 1.1  | 19.6 | 1.0  | 0.3 | 1.6  | 0.0 | 1.3  | 0.7749578 | 276.0  | 3.5   | 275.5  | 4.0   | 271.2  | 23.9  | -1.8    |
| Spot 299           | 97   | 3192.6   | 1.6  | 18.2 | 3.6  | 0.3 | 4.4  | 0.0 | 2.4  | 0.5412083 | 282.7  | 6.6   | 277.9  | 10.7  | 237.7  | 85.2  | -19.0   |
| Spot 300           | 107  | 7217.1   | 1.6  | 10.9 | 7.7  | 0.4 | 8.1  | 0.0 | 2.5  | 0.3083901 | 203.3  | 5.0   | 341.7  | 23.5  | 1436.9 | 147.4 | 85.9    |
| Spot 304           | 349  | 4815.8   | 1.8  | 18.8 | 1.7  | 0.3 | 3.0  | 0.0 | 1.8  | 0.5937815 | 296.9  | 5.1   | 288.8  | 7.5   | 224.0  | 55.5  | -32.5   |
| Spot 305           | 754  | 8536.2   | 26.7 | 18.7 | 2.7  | 0.3 | 3.1  | 0.0 | 1.4  | 0.4599956 | 243.5  | 3.4   | 249.3  | 6.8   | 303.4  | 62.3  | 19.7    |
| Spot 306           | 114  | 3962.8   | 6.0  | 13.6 | 1.4  | 1.6 | 3.7  | 0.2 | 2.2  | 0.5951233 | 1002.9 | 20.2  | 988.4  | 23.1  | 956.3  | 60.0  | -4.9    |
| Spot 307           | 524  | 4013.5   | 3.0  | 20.0 | 1.4  | 0.2 | 3.5  | 0.0 | 1.5  | 0.4396729 | 233.1  | 3.5   | 216.6  | 6.7   | 40.5   | NA    | -475.0  |
| Spot 308           | 152  | 1986.7   | 1.6  | 18.0 | 3.3  | 0.3 | 5.4  | 0.0 | 1.7  | 0.3057279 | 271.9  | 4.4   | 257.6  | 12.3  | 129.4  | 121.2 | -110.1  |
| Spot 309           | 140  | 10522.8  | 3.9  | 12.8 | 1.1  | 2.1 | 1.6  | 0.2 | 1.2  | 0.7484137 | 1159.9 | 13.0  | 1154.4 | 11.3  | 1144.0 | 21.6  | -1.4    |
| Spot 311           | 107  | 3371.0   | 1.9  | 17.1 | 2.1  | 0.6 | 2.8  | 0.1 | 1.7  | 0.6090091 | 466.1  | 7.7   | 456.3  | 10.4  | 407.1  | 50.0  | -14.5   |
| Spot 313           | 628  | 26157.5  | 3.4  | 14.2 | 1.6  | 1.3 | 2.6  | 0.1 | 2.1  | 0.7898213 | 831.4  | 16.0  | 861.8  | 15.1  | 940.8  | 32.7  | 11.6    |
| Spot 314           | 260  | 11998.2  | 1.5  | 19.0 | 2.9  | 0.3 | 3.7  | 0.0 | 2.4  | 0.6336236 | 279.7  | 6.5   | 280.0  | 9.1   | 282.7  | 65.9  | 1.1     |
| Run 2 (discordant) |      |          |      |      |      |     |      |     |      |           |        |       |        |       |        |       |         |
| Spot 100           | 48   | 1247.7   | 1.8  | 15.5 | 6.1  | 1.3 | 8.1  | 0.1 | 5.4  | 0.6670492 | 872.3  | 44.3  | 839.8  | 46.6  | 754.7  | 128.2 | -15.6   |
| Spot 101           | 54   | 6593.0   | 3.2  | 16.6 | 2.2  | 1.5 | 3.0  | 0.2 | 2.1  | 0.6915202 | 1054.1 | 20.5  | 921.9  | 18.4  | 617.4  | 47.4  | -70.7   |
| Spot 104           | 377  | 18643.9  | 2.1  | 12.5 | 1.5  | 2.6 | 4.2  | 0.2 | 4.0  | 0.9386719 | 1358.2 | 48.7  | 1297.9 | 31.0  | 1199.7 | 28.8  | -13.2   |
| Spot 107           | 984  | #####    | 6.4  | 13.1 | 1.4  | 1.4 | 2.3  | 0.1 | 1.9  | 0.799264  | 803.8  | 14.0  | 888.1  | 13.7  | 1104.4 | 27.8  | 27.2    |
| Spot 109           | 118  | 15253.6  | 3.1  | 13.6 | 2.6  | 1.4 | 4.9  | 0.1 | 4.1  | 0.8419608 | 813.0  | 31.4  | 872.7  | 28.6  | 1027.3 | 53.3  | 20.9    |
| Spot 110           | 93   | 4512.6   | 1.9  | 13.1 | 1.4  | 2.1 | 2.3  | 0.2 | 1.8  | 0.8019013 | 1162.3 | 19.3  | 1141.6 | 15.6  | 1102.5 | 27.1  | -5.4    |
| Spot 120           | 674  | 64946.9  | 18.3 | 9.1  | 0.8  | 3.8 | 1.9  | 0.2 | 1.7  | 0.8979763 | 1435.9 | 21.7  | 1587.6 | 15.1  | 1795.5 | 15.0  | 20.0    |
| Spot 121           | 100  | 11228.8  | 0.8  | 27.5 | 2.8  | 0.2 | 30.1 | 0.0 | 30.0 | 0.9956886 | 259.6  | 76.3  | 190.1  | 52.3  | NA     | NA    |         |
| Spot 124           | 61   | 386.8    | 0.3  | 57.5 | 61.7 | 0.1 | 61.7 | 0.0 | 2.6  | 0.042672  | 190.4  | 4.9   | 70.5   | 42.1  | NA     | NA    |         |
| Spot 125           | 666  | 5229.3   | 1.5  | 20.5 | 3.9  | 0.1 | 10.0 | 0.0 | 9.3  | 0.9222403 | 77.4   | 7.1   | 79.4   | 7.7   | 139.2  | 91.3  | 44.4    |
| Spot 129           | 747  | 30436.8  | 5.0  | 20.0 | 1.8  | 0.3 | 6.5  | 0.0 | 6.3  | 0.959664  | 277.8  | 17.1  | 268.7  | 15.5  | 189.5  | 42.8  | -46.6   |
| Spot 131           | 419  | 94112.5  | 3.9  | 5.8  | 2.4  | 6.2 | 3.6  | 0.3 | 2.7  | 0.7470358 | 1489.7 | 36.1  | 2001.1 | 31.8  | 2580.2 | 40.4  | 42.3    |
| Spot 136           | 74   | 3374.4   | 2.5  | 15.1 | 2.9  | 1.5 | 3.5  | 0.2 | 2.0  | 0.564344  | 964.2  | 17.5  | 919.1  | 20.9  | 812.6  | 59.8  | -18.7   |
| Spot 147           | 93   | 38280.1  | 2.2  | 13.9 | 1.7  | 2.4 | 2.1  | 0.2 | 1.3  | 0.6008448 | 1399.9 | 16.0  | 1241.4 | 15.1  | 976.1  | 34.4  | -43.4   |
| Spot 150           | 62   | 1293.9   | 1.5  | 16.5 | 3.7  | 1.2 | 5.0  | 0.1 | 3.4  | 0.6693126 | 859.3  | 27.1  | 797.2  | 27.8  | 627.2  | 80.6  | -37.0   |
| Spot 163           | 182  | 1917.6   | 0.6  | 22.7 | 3.9  | 0.2 | 15.5 | 0.0 | 15.0 | 0.9685002 | 203.1  | 30.0  | 180.3  | 25.6  | NA     | NA    |         |
| Spot 171           | 116  | 734.4    | 4.5  | 25.2 | 7.7  | 0.1 | 13.9 | 0.0 | 11.6 | 0.8331311 | 102.8  | 11.8  | 85.7   | 11.4  | NA     | NA    |         |
| Spot 173           | 34   | 304.6    | 2.2  | 8.0  | 25.3 | 0.5 | 27.7 | 0.0 | 11.3 | 0.4083299 | 191.0  | 21.3  | 424.9  | 96.6  | 2033.2 | 455.9 | 90.6    |
| Spot 182           | 73   | 1657.1   | 1.0  | 16.1 | 8.2  | 0.3 | 11.7 | 0.0 | 8.4  | 0.7124267 | 197.4  | 16.3  | 240.2  | 25.1  | 682.7  | 176.2 | 71.1    |
| Spot 19            | 155  | 29837.9  | 1.2  | 10.2 | 1.3  | 4.1 | 2.2  | 0.3 | 1.7  | 0.7921412 | 1696.8 | 25.7  | 1651.9 | 17.7  | 1595.3 | 24.8  | -6.4    |
| Spot 192           | 44   | 1863.5   | 1.2  | 16.3 | 4.1  | 1.7 | 20.3 | 0.2 | 19.9 | 0.9797562 | 1180.8 | 214.3 | 1008.7 | 130.3 | 651.8  | 87.1  | -81.2   |
| Spot 201           | 67   | 4171.1   | 1.7  | 15.2 | 3.2  | 1.4 | 3.7  | 0.2 | 1.9  | 0.4956811 | 903.0  | 15.6  | 872.3  | 21.9  | 795.1  | 68.0  | -13.6   |
| Spot 202           | 267  | 17925.6  | 3.0  | 12.9 | 3.0  | 1.6 | 3.4  | 0.1 | 1.6  | 0.4743028 | 892.6  | 13.5  | 966.6  | 21.3  | 1138.9 | 59.8  | 21.6    |
| Spot 209           | 392  | 210240.8 | 1.4  | 21.6 | 1.8  | 0.3 | 15.0 | 0.0 | 14.9 | 0.9923919 | 306.3  | 44.5  | 274.8  | 36.1  | 14.3   | NA    | -2048.1 |
| Spot 21            | 36   | 81274.2  | 1.9  | 13.3 | 2.7  | 1.4 | 3.6  | 0.1 | 2.4  | 0.6655292 | 797.9  | 18.2  | 874.7  | 21.4  | 1074.6 | 54.7  | 25.8    |
| Spot 213           | 702  | 66551.6  | 7.5  | 12.5 | 0.8  | 2.4 | 1.6  | 0.2 | 1.4  | 0.8704749 | 1268.5 | 16.5  | 1241.8 | 11.8  | 1195.7 | 15.9  | -6.1    |

|          |      |          |      |       |      |     |      |     |      |           |        |       |        |       |        |       |        |
|----------|------|----------|------|-------|------|-----|------|-----|------|-----------|--------|-------|--------|-------|--------|-------|--------|
| Spot 216 | 17   | 838.5    | 2.3  | 19.6  | 8.7  | 1.1 | 10.2 | 0.2 | 5.4  | 0.5283981 | 968.4  | 48.6  | 771.9  | 55.4  | 238.6  | 200.7 | -305.8 |
| Spot 22  | 129  | 5072.9   | 2.7  | 14.9  | 1.0  | 1.4 | 1.6  | 0.2 | 1.3  | 0.7892122 | 911.5  | 10.7  | 889.5  | 9.4   | 835.1  | 20.3  | -9.1   |
| Spot 224 | 97   | 4873.5   | 4.0  | 14.7  | 1.7  | 1.6 | 2.4  | 0.2 | 1.7  | 0.7088479 | 988.0  | 15.6  | 952.5  | 14.8  | 871.4  | 35.0  | -13.4  |
| Spot 23  | 97   | 4483.1   | 3.7  | 14.9  | 2.1  | 1.4 | 3.1  | 0.2 | 2.3  | 0.7499618 | 913.5  | 19.8  | 890.8  | 18.4  | 835.0  | 42.8  | -9.4   |
| Spot 237 | 136  | 1209.4   | 1.6  | 28.5  | 4.7  | 0.1 | 9.8  | 0.0 | 8.5  | 0.8747699 | 194.3  | 16.3  | 140.0  | 12.8  | NA     | NA    |        |
| Spot 248 | 130  | 2324.2   | 1.7  | 23.2  | 4.1  | 0.3 | 18.9 | 0.1 | 18.5 | 0.9757338 | 332.3  | 59.9  | 277.1  | 46.0  | NA     | NA    |        |
| Spot 250 | 115  | 35831.2  | 1.9  | 15.0  | 3.1  | 1.5 | 5.8  | 0.2 | 4.9  | 0.8408079 | 990.5  | 44.6  | 940.1  | 35.4  | 824.0  | 65.3  | -20.2  |
| Spot 251 | 192  | 7985.5   | 4.5  | 13.4  | 3.9  | 1.7 | 7.3  | 0.2 | 6.2  | 0.8477359 | 982.5  | 56.2  | 1004.8 | 46.4  | 1053.9 | 77.7  | 6.8    |
| Spot 253 | 1112 | 110978.1 | 9.9  | 12.5  | 0.8  | 2.4 | 1.6  | 0.2 | 1.4  | 0.8587317 | 1281.4 | 16.0  | 1251.0 | 11.5  | 1199.0 | 16.2  | -6.9   |
| Spot 257 | 350  | 38683.3  | 4.2  | 11.4  | 1.4  | 3.1 | 2.7  | 0.3 | 2.4  | 0.8649667 | 1479.0 | 31.4  | 1439.8 | 21.1  | 1382.5 | 26.5  | -7.0   |
| Spot 268 | 107  | 3778.5   | 2.0  | 13.0  | 1.8  | 2.1 | 2.7  | 0.2 | 2.0  | 0.7416746 | 1170.2 | 21.2  | 1150.5 | 18.4  | 1113.6 | 35.8  | -5.1   |
| Spot 27  | 69   | 21412.1  | 1.4  | 17.1  | 4.1  | 1.1 | 10.5 | 0.1 | 9.7  | 0.9207586 | 854.1  | 77.5  | 772.4  | 57.0  | 542.9  | 89.8  | -57.3  |
| Spot 275 | 121  | 4905.6   | 1.0  | 12.9  | 2.4  | 2.2 | 3.7  | 0.2 | 2.9  | 0.7681656 | 1205.6 | 31.7  | 1182.8 | 26.2  | 1141.4 | 47.7  | -5.6   |
| Spot 276 | 150  | 2759.6   | 1.2  | 19.2  | 5.2  | 0.2 | 12.5 | 0.0 | 11.4 | 0.9080619 | 207.6  | 23.2  | 214.6  | 24.2  | 291.7  | 119.7 | 28.8   |
| Spot 278 | 129  | 383.0    | 4.9  | 501.6 | 74.4 | 0.0 | 80.3 | 0.0 | 30.0 | 0.3737598 | 109.5  | 32.6  | 4.8    | 3.8   | NA     | NA    |        |
| Spot 284 | 107  | 2880.2   | 2.4  | 15.4  | 3.1  | 1.4 | 3.5  | 0.2 | 1.6  | 0.4677473 | 908.2  | 13.8  | 869.6  | 20.3  | 772.5  | 64.7  | -17.6  |
| Spot 289 | 87   | 2129.1   | 3.2  | 15.9  | 1.7  | 1.3 | 2.5  | 0.2 | 1.9  | 0.7441415 | 925.3  | 16.3  | 863.0  | 14.8  | 706.2  | 36.1  | -31.0  |
| Spot 29  | 132  | 2943.8   | 1.5  | 14.9  | 2.4  | 1.4 | 2.7  | 0.2 | 1.3  | 0.490026  | 929.3  | 11.6  | 902.3  | 16.3  | 836.8  | 49.5  | -11.1  |
| Spot 291 | 299  | 36495.3  | 3.5  | 11.9  | 1.0  | 2.8 | 2.0  | 0.2 | 1.8  | 0.8795678 | 1372.5 | 21.8  | 1342.8 | 15.0  | 1295.7 | 18.6  | -5.9   |
| Spot 301 | 89   | 135471.4 | 2.1  | 14.2  | 1.6  | 1.7 | 2.2  | 0.2 | 1.6  | 0.7046726 | 1035.5 | 15.1  | 1006.2 | 14.3  | 942.8  | 32.5  | -9.8   |
| Spot 302 | 87   | 2513.4   | 2.7  | 15.5  | 1.7  | 1.4 | 2.4  | 0.2 | 1.6  | 0.6905573 | 919.4  | 14.0  | 874.2  | 13.9  | 761.5  | 36.1  | -20.7  |
| Spot 303 | 835  | 30051.7  | 0.9  | 19.4  | 2.1  | 0.3 | 12.1 | 0.0 | 11.9 | 0.9845691 | 276.6  | 32.2  | 275.8  | 29.2  | 269.0  | 48.5  | -2.8   |
| Spot 31  | 92   | 36536.5  | 3.5  | 13.6  | 3.9  | 1.4 | 8.2  | 0.1 | 7.3  | 0.8826983 | 856.0  | 58.3  | 904.5  | 49.4  | 1024.8 | 78.3  | 16.5   |
| Spot 310 | 114  | 2456.9   | 3.3  | 15.4  | 1.6  | 1.4 | 2.3  | 0.2 | 1.6  | 0.7231673 | 938.2  | 14.2  | 890.5  | 13.4  | 773.8  | 32.8  | -21.2  |
| Spot 312 | 469  | 23843.3  | 4.2  | 12.0  | 0.8  | 2.7 | 1.4  | 0.2 | 1.1  | 0.8114087 | 1372.9 | 14.2  | 1338.4 | 10.5  | 1283.8 | 16.1  | -6.9   |
| Spot 315 | 76   | 4516.6   | 1.3  | 27.6  | 6.2  | 0.3 | 28.8 | 0.1 | 28.1 | 0.9763828 | 429.5  | 116.7 | 300.3  | 74.9  | NA     | NA    |        |
| Spot 35  | 334  | 9443.2   | 0.6  | 29.6  | 1.6  | 0.6 | 30.0 | 0.1 | 30.0 | 0.9985578 | 746.1  | 211.4 | 459.0  | 111.4 | NA     | NA    |        |
| Spot 55  | 109  | 2438.7   | 2.0  | 13.9  | 1.6  | 1.8 | 2.1  | 0.2 | 1.4  | 0.6440161 | 1093.5 | 13.7  | 1055.1 | 13.9  | 976.5  | 33.0  | -12.0  |
| Spot 56  | 73   | 5567.7   | 18.9 | 15.3  | 3.3  | 1.4 | 5.2  | 0.2 | 3.9  | 0.7623093 | 962.6  | 35.2  | 909.2  | 31.0  | 781.7  | 70.3  | -23.1  |
| Spot 62  | 1495 | 136382.9 | 3.4  | 13.5  | 0.9  | 2.0 | 2.5  | 0.2 | 2.3  | 0.9287031 | 1158.9 | 24.8  | 1119.0 | 17.0  | 1042.1 | 18.8  | -11.2  |
| Spot 65  | 258  | 37187.4  | 1.0  | 20.1  | 2.7  | 0.3 | 13.7 | 0.1 | 13.5 | 0.979834  | 318.7  | 41.8  | 302.2  | 35.9  | 176.9  | 64.0  | -80.2  |
| Spot 7   | 121  | 347245.1 | 0.9  | 17.5  | 3.9  | 0.2 | 8.6  | 0.0 | 7.6  | 0.8900227 | 200.8  | 15.1  | 225.6  | 17.4  | 492.9  | 86.3  | 59.3   |
| Spot 76  | 209  | 2810.0   | 1.1  | 18.1  | 6.0  | 0.2 | 12.7 | 0.0 | 11.2 | 0.8802939 | 201.1  | 22.2  | 219.8  | 25.2  | 425.1  | 134.8 | 52.7   |
| Spot 9   | 121  | 1154.8   | 1.8  | 25.6  | 4.5  | 0.2 | 25.5 | 0.0 | 25.1 | 0.9843358 | 231.9  | 57.2  | 183.0  | 42.7  | NA     | NA    |        |
| Spot 95  | 268  | 17264.3  | 1.4  | 15.7  | 4.7  | 0.4 | 9.3  | 0.0 | 8.0  | 0.8614709 | 313.7  | 24.6  | 368.8  | 28.8  | 731.5  | 100.3 | 57.1   |
