# Supplementary material for: Increased accuracy and precision in igneous and detrital zircon geochronology using CA-LA-ICPMS
Source: Copernicus journal article supplement (doi:10.5194/gchron-2023-20), 2023-08-25
Supplement: Supplementary file 33 [file gchron-2023-20-supplement.zip]

**TABLE S2: GHR1 LA-ICPMS U-Pb ZIRCON GEOCHRONOLOGY**

| Zircon #                             | Composition |              |      |              |                |             |                |             |                | Ages        |             |                 |             |                 |              |                 |         |
|--------------------------------------|-------------|--------------|------|--------------|----------------|-------------|----------------|-------------|----------------|-------------|-------------|-----------------|-------------|-----------------|--------------|-----------------|---------|
|                                      | U           | 206Pb/ 204Pb | U/Th | 206Pb/ 207Pb | 2 $\sigma$ (%) | 207Pb/ 235U | 2 $\sigma$ (%) | 206Pb/ 238U | 2 $\sigma$ (%) | error corr. | 206Pb/ 238U | 2 $\sigma$ (Ma) | 207Pb/ 235U | 2 $\sigma$ (Ma) | 206Pb/ 207Pb | 2 $\sigma$ (Ma) | % Disc. |
| <b>GHR1 no CA Run 1</b>              |             |              |      |              |                |             |                |             |                |             |             |                 |             |                 |              |                 |         |
| GHR1-1                               | 811         | 2601         | 2.53 | 19.193       | 8.3            | 0.0547      | 8.9            | 0.00762     | 3.2            | 0.354       | 48.9        | 1.5             | 54.1        | 4.7             | 288.9        | 190.2           | 83.1    |
| GHR1-2                               | 611         | 154552       | 2.82 | 18.515       | 7.5            | 0.0592      | 8.2            | 0.00795     | 3.2            | 0.386       | 51.0        | 1.6             | 58.4        | 4.6             | 370.5        | 169.5           | 86.2    |
| GHR1-3                               | 545         | 2172         | 2.52 | 24.084       | 8.3            | 0.0452      | 9.4            | 0.00790     | 4.4            | 0.469       | 50.7        | 2.2             | 44.9        | 4.1             | NA           | NA              | NA      |
| GHR1-4                               | 598         | 2838         | 2.88 | 21.982       | 9.3            | 0.0470      | 10.9           | 0.00749     | 5.5            | 0.511       | 48.1        | 2.7             | 46.6        | 4.9             | NA           | NA              | NA      |
| GHR1-6                               | 927         | 4515         | 2.47 | 20.423       | 9.8            | 0.0474      | 10.1           | 0.00703     | 2.5            | 0.244       | 45.2        | 1.1             | 47.1        | 4.6             | 145.1        | 230.0           | 68.9    |
| GHR1-7                               | 559         | 31877        | 2.84 | 16.347       | 8.5            | 0.0659      | 9.3            | 0.00782     | 3.8            | 0.409       | 50.2        | 1.9             | 64.8        | 5.9             | 644.4        | 183.4           | 92.2    |
| GHR1-8                               | 433         | 2256         | 3.16 | 17.840       | 14.4           | 0.0612      | 15.3           | 0.00792     | 5.4            | 0.353       | 50.8        | 2.7             | 60.3        | 9.0             | 453.5        | 319.0           | 88.8    |
| GHR1-9                               | 460         | 25984        | 2.78 | 20.051       | 7.8            | 0.0543      | 9.7            | 0.00790     | 5.7            | 0.587       | 50.7        | 2.9             | 53.7        | 5.1             | 188.1        | 182.6           | 73.0    |
| GHR1-10                              | 937         | 9604         | 2.21 | 20.134       | 4.9            | 0.0487      | 5.6            | 0.00711     | 2.8            | 0.495       | 45.7        | 1.3             | 48.3        | 2.6             | 178.4        | 113.9           | 74.4    |
| GHR1-11                              | 907         | 7573         | 1.78 | 21.798       | 5.2            | 0.0485      | 6.4            | 0.00768     | 3.6            | 0.564       | 49.3        | 1.8             | 48.1        | 3.0             | NA           | NA              | NA      |
| GHR1-13                              | 569         | 6404         | 2.67 | 21.794       | 6.2            | 0.0482      | 7.2            | 0.00763     | 3.7            | 0.515       | 49.0        | 1.8             | 47.8        | 3.4             | NA           | NA              | NA      |
| GHR1-14                              | 509         | 3155         | 2.45 | 24.171       | 7.0            | 0.0437      | 11.2           | 0.00767     | 8.7            | 0.783       | 49.3        | 4.3             | 43.5        | 4.8             | NA           | NA              | NA      |
| GHR1-15                              | 256         | 10569        | 2.22 | 14.121       | 16.2           | 0.0798      | 17.5           | 0.00818     | 6.7            | 0.384       | 52.5        | 3.5             | 78.0        | 13.1            | 951.2        | 331.1           | 94.5    |
| <b>GHR1 no CA Run 1 (discordant)</b> |             |              |      |              |                |             |                |             |                |             |             |                 |             |                 |              |                 |         |
| GHR1-5                               | 363         | 471          | 3.14 | 9.387        | 29.2           | 0.1201      | 30.0           | 0.00818     | 3.4            | 0.226       | 52.5        | 3.6             | 115.2       | 32.7            | 1740.1       | 538.8           | 97.0    |
| GHR1-12                              | 470         | 3975         | 3.31 | 25.522       | 5.6            | 0.0495      | 55.6           | 0.00917     | 27.7           | 0.995       | 58.8        | 32.4            | 49.1        | 26.6            | NA           | NA              | NA      |
| <b>GHR1 no CA Run 2</b>              |             |              |      |              |                |             |                |             |                |             |             |                 |             |                 |              |                 |         |
| GHR1 1                               | 1314        | 174251       | 1.71 | 21.055       | 2.5            | 0.0519      | 3.2            | 0.0079      | 2              | 0.614       | 50.9        | 1               | 51.4        | 1.6             | 73.1         | 60.5            | 30.4    |
| GHR1 10                              | 429         | 5000         | 3.54 | 23.07        | 11             | 0.0464      | 11.2           | 0.0078      | 2.1            | 0.183       | 49.8        | 1               | 46          | 5.1             | 500          | 1               | 90.0    |
| GHR1 11                              | 720         | 5000         | 2.17 | 22.739       | 5              | 0.0461      | 5.5            | 0.0076      | 2.4            | 0.426       | 48.8        | 1.2             | 45.7        | 2.5             | 500          | 1               | 90.2    |
| GHR1 12                              | 288         | 25194        | 2.94 | 14.014       | 20.1           | 0.0765      | 20.4           | 0.0078      | 3.6            | 0.177       | 50          | 1.8             | 74.9        | 14.7            | 966.8        | 410.6           | 94.8    |
| GHR1 13                              | 764         | 49893        | 2.94 | 21.036       | 3.8            | 0.0513      | 4.9            | 0.0078      | 3.1            | 0.64        | 50.3        | 1.6             | 50.8        | 2.4             | 75.2         | 89.4            | 33.1    |
| GHR1 14                              | 415         | 31514        | 3.29 | 20.768       | 5.4            | 0.0492      | 5.8            | 0.0074      | 1.9            | 0.333       | 47.6        | 0.9             | 48.8        | 2.7             | 105.6        | 128.4           | 54.9    |
| GHR1 15                              | 527         | 1320048      | 2.99 | 20.648       | 6.6            | 0.0507      | 7.3            | 0.0076      | 3.1            | 0.429       | 48.7        | 1.5             | 50.2        | 3.6             | 119.3        | 155.6           | 59.2    |
| GHR1 16                              | 613         | 37708        | 2.63 | 20.556       | 3.6            | 0.0505      | 4.7            | 0.0075      | 3              | 0.639       | 48.4        | 1.4             | 50          | 2.3             | 129.8        | 84.9            | 62.7    |
| GHR1 17                              | 313         | 23025        | 3.41 | 21.116       | 7.6            | 0.0494      | 8.2            | 0.0076      | 3.1            | 0.38        | 48.6        | 1.5             | 48.9        | 3.9             | 66.3         | 180             | 26.7    |
| GHR1 18                              | 189         | 58098        | 4.85 | 21.432       | 9.9            | 0.0486      | 10.7           | 0.0076      | 4.1            | 0.385       | 48.5        | 2               | 48.1        | 5               | 30.8         | 236.3           | -57.5   |
| GHR1 19                              | 713         | 25986        | 2.21 | 21.417       | 6.2            | 0.0503      | 7.9            | 0.0078      | 5              | 0.626       | 50.2        | 2.5             | 49.8        | 3.9             | 32.5         | 148.1           | -54.5   |
| GHR1 2                               | 395         | 73238        | 3.64 | 21.251       | 6.4            | 0.0481      | 7.5            | 0.0074      | 4              | 0.53        | 47.7        | 1.9             | 47.7        | 3.5             | 51           | 151.9           | 6.5     |
| GHR1 20                              | 429         | 219893       | 3.4  | 21.29        | 5.5            | 0.0481      | 6.1            | 0.0074      | 2.7            | 0.439       | 47.8        | 1.3             | 47.7        | 2.9             | 46.6         | 131.3           | -2.6    |
| GHR1 21                              | 173         | 5000         | 6.78 | 22.379       | 13             | 0.0464      | 13.4           | 0.0075      | 3.3            | 0.243       | 48.4        | 1.6             | 46          | 6               | 73.9         | 318.9           | 34.5    |
| GHR1 22                              | 246         | 5000         | 3.01 | 21.936       | 12.3           | 0.0463      | 12.8           | 0.0074      | 3.7            | 0.288       | 47.3        | 1.7             | 45.9        | 5.8             | 25.2         | 297.4           | -87.7   |
| GHR1 23                              | 198         | 5000         | 3.66 | 23.543       | 13.2           | 0.0461      | 13.6           | 0.0079      | 3.2            | 0.235       | 50.5        | 1.6             | 45.7        | 6.1             | 500          | 1               | 89.9    |
| GHR1 24                              | 866         | 24084        | 2.01 | 21.183       | 4.2            | 0.0536      | 5.1            | 0.0082      | 2.9            | 0.574       | 52.9        | 1.5             | 53          | 2.6             | 58.7         | 99.7            | 9.9     |
| GHR1 25                              | 317         | 5000         | 3.45 | 22.459       | 11.3           | 0.0468      | 11.6           | 0.0076      | 2.8            | 0.241       | 48.9        | 1.4             | 46.4        | 5.3             | 82.6         | 276.5           | 40.8    |
| GHR1 26                              | 1416        | 5000         | 1.95 | 11.486       | 8              | 0.1009      | 8.5            | 0.0084      | 2.8            | 0.335       | 54          | 1.5             | 97.6        | 7.9             | 1361         | 154.2           | 96.0    |
| GHR1 27                              | 302         | 31821        | 3.2  | 20.593       | 5.7            | 0.0509      | 6.6            | 0.0076      | 3.2            | 0.494       | 48.9        | 1.6             | 50.4        | 3.2             | 125.6        | 134.1           | 61.1    |
| GHR1 28                              | 503         | 5000         | 2.64 | 22.533       | 11.1           | 0.0477      | 11.4           | 0.0078      | 2.7            | 0.241       | 50.1        | 1.4             | 47.3        | 5.3             | 90.7         | 271.4           | 44.8    |

|         |      |       |      |        |      |        |      |        |     |       |      |     |      |      |       |       |        |
|---------|------|-------|------|--------|------|--------|------|--------|-----|-------|------|-----|------|------|-------|-------|--------|
| GHR1 29 | 1801 | 75664 | 0.91 | 21.243 | 3.2  | 0.0542 | 4.1  | 0.0084 | 2.5 | 0.62  | 53.6 | 1.3 | 53.6 | 2.1  | 52    | 76.1  | -3.1   |
| GHR1 3  | 681  | 97174 | 1.88 | 20.843 | 3.6  | 0.0513 | 3.8  | 0.0078 | 1.4 | 0.369 | 49.9 | 0.7 | 50.8 | 1.9  | 97    | 84.3  | 48.6   |
| GHR1 30 | 328  | 84945 | 3.45 | 17.456 | 6.3  | 0.0603 | 7    | 0.0076 | 3   | 0.43  | 49   | 1.5 | 59.4 | 4    | 501.6 | 139   | 90.2   |
| GHR1 4  | 356  | 5000  | 2.18 | 11.876 | 21.2 | 0.0886 | 21.4 | 0.0076 | 2.8 | 0.131 | 49   | 1.4 | 86.2 | 17.7 | 1296  | 414   | 96.2   |
| GHR1 5  | 821  | 5000  | 3.4  | 22.774 | 10.7 | 0.0474 | 11.1 | 0.0078 | 2.8 | 0.253 | 50.3 | 1.4 | 47   | 5.1  | 116.8 | 263.7 | 56.9   |
| GHR1 6  | 441  | 5000  | 2.54 | 21.912 | 11.3 | 0.0472 | 11.6 | 0.0075 | 2.7 | 0.236 | 48.2 | 1.3 | 46.8 | 5.3  | 22.5  | 273.9 | -114.2 |
| GHR1 7  | 556  | 31439 | 2.73 | 17.767 | 7    | 0.0559 | 7.7  | 0.0072 | 3.3 | 0.426 | 46.3 | 1.5 | 55.2 | 4.1  | 462.6 | 154.6 | 90.0   |
| GHR1 8  | 545  | 46147 | 3.08 | 21.433 | 5.4  | 0.0485 | 6.5  | 0.0075 | 3.6 | 0.55  | 48.4 | 1.7 | 48   | 3.1  | 30.6  | 130.4 | -58.2  |
| GHR1 9  | 221  | 21737 | 3.07 | 20.198 | 8    | 0.0509 | 8.6  | 0.0075 | 3.3 | 0.383 | 47.9 | 1.6 | 50.4 | 4.2  | 171   | 186.3 | 72.0   |

| Composition   |       |        |      |        |      |        |      |         |     | Ages  |        |      |        |      |        |       |        |
|---------------|-------|--------|------|--------|------|--------|------|---------|-----|-------|--------|------|--------|------|--------|-------|--------|
| Zircon        | U     | 206Pb/ | U/Th | 206Pb/ | 2σ   | 207Pb/ | 2σ   | 206Pb/  | 2σ  | error | 206Pb/ | 2σ   | 207Pb/ | 2σ   | 206Pb/ | 2σ    | %      |
| #             | (ppm) | 204Pb  |      | 207Pb  | (%)  | 235U   | (%)  | 238U    | (%) | Corr. | 238U   | (Ma) | 235U   | (Ma) | 207Pb  | (Ma)  | Disc.  |
| GHR1 CA Run 1 |       |        |      |        |      |        |      |         |     |       |        |      |        |      |        |       |        |
| GHR1-1        | 706   | 4834   | 2.82 | 22.737 | 4.2  | 0.0464 | 5.9  | 0.00766 | 4.2 | 0.709 | 49.2   | 2.0  | 46.1   | 2.7  | NA     | NA    | NA     |
| GHR1-2        | 699   | 4591   | 4.32 | 21.476 | 5.6  | 0.0474 | 7.1  | 0.00739 | 4.3 | 0.606 | 47.4   | 2.0  | 47.0   | 3.3  | 25.9   | NA    | -83.2  |
| GHR1-3        | 790   | 55149  | 2.63 | 20.730 | 5.2  | 0.0546 | 7.3  | 0.00822 | 5.1 | 0.703 | 52.8   | 2.7  | 54.0   | 3.8  | 110.0  | 122.2 | 52.0   |
| GHR1-4        | 621   | 2104   | 2.78 | 23.893 | 5.9  | 0.0442 | 7.2  | 0.00766 | 4.2 | 0.576 | 49.2   | 2.0  | 43.9   | 3.1  | NA     | NA    | NA     |
| GHR1-5        | 818   | 2492   | 2.54 | 22.116 | 6.8  | 0.0463 | 8.5  | 0.00743 | 5.1 | 0.602 | 47.7   | 2.4  | 46.0   | 3.8  | NA     | NA    | NA     |
| GHR1-6        | 632   | 1763   | 2.70 | 21.889 | 13.4 | 0.0493 | 14.2 | 0.00782 | 4.7 | 0.331 | 50.2   | 2.3  | 48.8   | 6.8  | NA     | NA    | NA     |
| GHR1-7        | 1106  | 98121  | 2.41 | 20.191 | 3.4  | 0.0520 | 5.3  | 0.00762 | 4.1 | 0.776 | 48.9   | 2.0  | 51.5   | 2.7  | 171.9  | 78.5  | 71.5   |
| GHR1-8        | 818   | 2204   | 2.44 | 22.926 | 12.2 | 0.0430 | 12.6 | 0.00715 | 3.3 | 0.261 | 45.9   | 1.5  | 42.7   | 5.3  | NA     | NA    | NA     |
| GHR1-9        | 757   | 1581   | 3.28 | 23.145 | 5.6  | 0.0445 | 6.3  | 0.00747 | 3.1 | 0.484 | 48.0   | 1.5  | 44.2   | 2.7  | NA     | NA    | NA     |
| GHR1-10       | 772   | 4855   | 2.65 | 16.112 | 8.1  | 0.0671 | 8.6  | 0.00784 | 2.9 | 0.338 | 50.4   | 1.5  | 65.9   | 5.5  | 675.5  | 174.0 | 92.5   |
| GHR1-11       | 353   | 1346   | 1.65 | 26.966 | 31.1 | 0.0396 | 31.5 | 0.00776 | 5.4 | 0.170 | 49.8   | 2.7  | 39.5   | 12.2 | NA     | NA    | NA     |
| GHR1-12       | 883   | 3212   | 3.21 | 20.659 | 7.6  | 0.0528 | 8.2  | 0.00791 | 2.9 | 0.360 | 50.8   | 1.5  | 52.2   | 4.2  | 118.1  | 179.6 | 57.0   |
| GHR1-13       | 750   | 3833   | 2.32 | 18.402 | 10.1 | 0.0598 | 11.8 | 0.00798 | 6.1 | 0.517 | 51.2   | 3.1  | 58.9   | 6.8  | 384.3  | 227.7 | 86.7   |
| GHR1-14       | 538   | 17286  | 2.61 | 19.472 | 9.1  | 0.0555 | 11.1 | 0.00784 | 6.3 | 0.567 | 50.3   | 3.1  | 54.8   | 5.9  | 255.8  | 209.4 | 80.3   |
| GHR1-15       | 664   | 2696   | 2.33 | 21.033 | 9.4  | 0.0500 | 9.9  | 0.00763 | 3.2 | 0.320 | 49.0   | 1.6  | 49.5   | 4.8  | 75.6   | NA    | 35.2   |
| GHR1 CA Run 2 |       |        |      |        |      |        |      |         |     |       |        |      |        |      |        |       |        |
| GHR1 1        | 671   | 5000   | 2.46 | 22.668 | 11.8 | 0.0454 | 12.1 | 0.0075  | 2.9 | 0.235 | 48     | 1.4  | 45.1   | 5.3  | 105.3  | 290   | 54.4   |
| GHR1 10       | 794   | 5000   | 3.17 | 22.575 | 11.2 | 0.046  | 11.7 | 0.0075  | 3.5 | 0.294 | 48.3   | 1.7  | 45.6   | 5.2  | 95.2   | 275.8 | 49.3   |
| GHR1 11       | 699   | 5000   | 2.73 | 22.931 | 11.7 | 0.0459 | 11.9 | 0.0076  | 2.2 | 0.184 | 49     | 1.1  | 45.6   | 5.3  | 133.8  | 289.2 | 63.4   |
| GHR1 12       | 689   | 523758 | 3.16 | 20.991 | 4.6  | 0.0508 | 5.2  | 0.0077  | 2.4 | 0.466 | 49.7   | 1.2  | 50.3   | 2.6  | 80.4   | 110.1 | 38.2   |
| GHR1 13       | 890   | 38932  | 2.15 | 21.39  | 4.6  | 0.0492 | 5.1  | 0.0076  | 2.3 | 0.445 | 49     | 1.1  | 48.7   | 2.4  | 35.5   | 110.4 | -38.0  |
| GHR1 14       | 763   | 27089  | 2.95 | 20.863 | 4.8  | 0.0509 | 5.6  | 0.0077  | 2.8 | 0.508 | 49.5   | 1.4  | 50.4   | 2.7  | 94.8   | 113.6 | 47.8   |
| GHR1 15       | 1048  | 80460  | 2.65 | 20.963 | 5.5  | 0.0504 | 5.8  | 0.0077  | 1.9 | 0.32  | 49.2   | 0.9  | 49.9   | 2.8  | 83.5   | 130.2 | 41.1   |
| GHR1 16       | 875   | 20875  | 2.82 | 21.45  | 6.7  | 0.0487 | 7.1  | 0.0076  | 2.3 | 0.33  | 48.7   | 1.1  | 48.3   | 3.3  | 28.7   | 160.3 | -69.7  |
| GHR1 17       | 2765  | 274997 | 1.61 | 21.284 | 2.8  | 0.0502 | 3.3  | 0.0078  | 1.8 | 0.54  | 49.8   | 0.9  | 49.7   | 1.6  | 47.4   | 67.1  | -5.1   |
| GHR1 18       | 1016  | 260441 | 3.14 | 21.177 | 4.2  | 0.0499 | 4.8  | 0.0077  | 2.3 | 0.481 | 49.3   | 1.1  | 49.5   | 2.3  | 59.3   | 101   | 16.9   |
| GHR1 19       | 915   | 40850  | 2.45 | 20.997 | 3.8  | 0.0504 | 4.9  | 0.0077  | 3.2 | 0.646 | 49.3   | 1.6  | 49.9   | 2.4  | 79.6   | 89.4  | 38.1   |
| GHR1 2        | 954   | 32160  | 2.34 | 21.595 | 4.4  | 0.0483 | 5.1  | 0.0076  | 2.7 | 0.516 | 48.6   | 1.3  | 47.9   | 2.4  | 12.6   | 106   | -285.7 |
| GHR1 20       | 1266  | 5000   | 2.18 | 23.019 | 10.7 | 0.0451 | 11.1 | 0.0075  | 2.9 | 0.26  | 48.3   | 1.4  | 44.8   | 4.8  | 500    | 1     | 90.3   |
| GHR1 21       | 891   | 5000   | 2.86 | 22.223 | 11.5 | 0.0461 | 11.7 | 0.0074  | 2.1 | 0.18  | 47.7   | 1    | 45.8   | 5.2  | 56.8   | 279.9 | 16.0   |

|         |      |        |      |        |      |        |      |        |     |       |      |     |      |     |       |       |        |
|---------|------|--------|------|--------|------|--------|------|--------|-----|-------|------|-----|------|-----|-------|-------|--------|
| GHR1 22 | 1348 | 5000   | 2.31 | 21.884 | 10.9 | 0.0472 | 11.3 | 0.0075 | 2.9 | 0.255 | 48.1 | 1.4 | 46.8 | 5.2 | 19.5  | 264.8 | -146.7 |
| GHR1 23 | 170  | 5000   | 2.12 | 19.428 | 14.5 | 0.0554 | 15.1 | 0.0078 | 4.4 | 0.289 | 50.1 | 2.2 | 54.7 | 8   | 261   | 332.2 | 80.8   |
| GHR1 24 | 1900 | 29517  | 2.13 | 21.086 | 3.5  | 0.0483 | 4.4  | 0.0074 | 2.7 | 0.609 | 47.5 | 1.3 | 47.9 | 2   | 69.5  | 82.6  | 31.7   |
| GHR1 25 | 813  | 40469  | 2.34 | 20.627 | 5.9  | 0.0501 | 6.5  | 0.0075 | 2.7 | 0.419 | 48.1 | 1.3 | 49.6 | 3.2 | 121.7 | 140.1 | 60.5   |
| GHR1 26 | 661  | 327566 | 2.88 | 21.51  | 5.2  | 0.0492 | 6    | 0.0077 | 3.1 | 0.514 | 49.3 | 1.5 | 48.8 | 2.9 | 22    | 124.5 | -124.1 |
| GHR1 27 | 805  | 5000   | 2.76 | 23.126 | 11.1 | 0.0454 | 11.3 | 0.0076 | 2.5 | 0.217 | 49   | 1.2 | 45.1 | 5   | 500   | 1     | 90.2   |
| GHR1 28 | 341  | 5000   | 1.72 | 19.92  | 13.9 | 0.0551 | 14.6 | 0.008  | 4.6 | 0.317 | 51.2 | 2.4 | 54.5 | 7.8 | 203.2 | 322.1 | 74.8   |
| GHR1 29 | 730  | 404631 | 2.39 | 20.1   | 7.1  | 0.0529 | 7.5  | 0.0077 | 2.4 | 0.326 | 49.5 | 1.2 | 52.3 | 3.8 | 182.3 | 165   | 72.8   |
| GHR1 3  | 849  | 5000   | 2.55 | 22.146 | 10.8 | 0.0469 | 11.2 | 0.0075 | 2.8 | 0.255 | 48.4 | 1.4 | 46.5 | 5.1 | 48.4  | 262.5 | 0.0    |
| GHR1 30 | 772  | 23517  | 2.29 | 21.379 | 4.9  | 0.0488 | 5.8  | 0.0076 | 3.2 | 0.55  | 48.7 | 1.6 | 48.4 | 2.8 | 36.7  | 116.8 | -32.7  |
| GHR1 4  | 947  | 53220  | 1.75 | 21.223 | 5.6  | 0.052  | 6.5  | 0.008  | 3.2 | 0.496 | 51.4 | 1.6 | 51.5 | 3.2 | 54.2  | 134.1 | 5.2    |
| GHR1 5  | 783  | 67196  | 2.51 | 21.311 | 5.1  | 0.0482 | 5.5  | 0.0075 | 2.1 | 0.375 | 47.8 | 1   | 47.8 | 2.6 | 44.3  | 122.4 | -7.9   |
| GHR1 6  | 946  | 5000   | 2.52 | 22.269 | 10.8 | 0.0473 | 11.2 | 0.0076 | 2.8 | 0.246 | 49.1 | 1.3 | 46.9 | 5.1 | 61.8  | 264.1 | 20.6   |
| GHR1 7  | 907  | 34448  | 2.66 | 21.465 | 4.6  | 0.0486 | 5.3  | 0.0076 | 2.6 | 0.489 | 48.6 | 1.3 | 48.2 | 2.5 | 27    | 111.3 | -80.0  |
| GHR1 8  | 854  | 35238  | 2.56 | 20.624 | 4.1  | 0.0512 | 5.8  | 0.0077 | 4.1 | 0.706 | 49.2 | 2   | 50.7 | 2.9 | 122.1 | 97.2  | 59.7   |
| GHR1 9  | 882  | 190837 | 2.81 | 21.797 | 4.5  | 0.0485 | 5.2  | 0.0077 | 2.5 | 0.482 | 49.2 | 1.2 | 48   | 2.4 | 9.9   | 109.8 | -397.0 |
