# Supplementary material for: Increased accuracy and precision in igneous and detrital zircon geochronology using CA-LA-ICPMS
Source: Copernicus journal article supplement (doi:10.5194/gchron-2023-20), 2023-08-25
Supplement: Supplementary file 34 [file gchron-2023-20-supplement.zip]

| Composition           |         |             |       |             |        |            |        |            |        | Ages        |            |         |            |         |             |         |         |
|-----------------------|---------|-------------|-------|-------------|--------|------------|--------|------------|--------|-------------|------------|---------|------------|---------|-------------|---------|---------|
| Zircon #              | U (ppm) | 206Pb/204Pb | U/Th  | 206Pb/207Pb | 2σ (%) | 207Pb/235U | 2σ (%) | 206Pb/238U | 2σ (%) | Error Corr. | 206Pb/238U | 2σ (Ma) | 207Pb/235U | 2σ (Ma) | 206Pb/207Pb | 2σ (Ma) | % Disc. |
| Plesovice no CA Run 1 |         |             |       |             |        |            |        |            |        |             |            |         |            |         |             |         |         |
| PLES-1                | 723     | 30466       | 10.41 | 19.430      | 1.8    | 0.3936     | 3.0    | 0.05549    | 2.4    | 0.800       | 348.1      | 8.1     | 337.0      | 8.6     | 260.8       | 41.3    | -33.5   |
| PLES-2                | 930     | 909024      | 8.94  | 19.018      | 2.2    | 0.3935     | 3.6    | 0.05430    | 2.8    | 0.787       | 340.9      | 9.3     | 336.9      | 10.2    | 309.8       | 50.1    | -10.0   |
| PLES-3                | 963     | 35296       | 11.27 | 18.287      | 2.7    | 0.4036     | 3.6    | 0.05356    | 2.4    | 0.673       | 336.3      | 8.0     | 344.3      | 10.6    | 398.4       | 59.9    | 15.6    |
| PLES-4                | 622     | 17028       | 10.80 | 19.104      | 2.0    | 0.3971     | 3.3    | 0.05050    | 2.6    | 0.789       | 345.4      | 8.6     | 339.6      | 9.4     | 299.5       | 45.7    | -15.4   |
| PLES-5                | 637     | 6644        | 7.19  | 16.538      | 6.1    | 0.4318     | 6.9    | 0.05182    | 3.4    | 0.487       | 325.7      | 10.7    | 364.5      | 21.2    | 619.3       | 130.8   | 47.4    |
| PLES-6                | 801     | 52298       | 12.34 | 18.241      | 2.0    | 0.3918     | 3.6    | 0.05185    | 3.0    | 0.831       | 325.9      | 9.6     | 335.7      | 10.4    | 404.0       | 45.3    | 19.3    |
| PLES-7                | 1293    | 13641       | 9.48  | 18.996      | 1.8    | 0.3909     | 3.6    | 0.05388    | 3.1    | 0.873       | 338.3      | 10.3    | 335.0      | 10.3    | 312.5       | 39.9    | -8.3    |
| PLES-8                | 904     | 71383       | 6.97  | 18.606      | 1.6    | 0.3868     | 2.7    | 0.05222    | 2.1    | 0.795       | 328.1      | 6.8     | 332.0      | 7.6     | 359.4       | 36.7    | 8.7     |
| PLES-9                | 665     | 13681       | 10.34 | 18.979      | 1.7    | 0.3955     | 3.1    | 0.05447    | 2.6    | 0.838       | 341.9      | 8.6     | 338.4      | 8.9     | 314.5       | 38.4    | -8.7    |
| PLES-10               | 912     | 16009       | 7.39  | 19.028      | 1.6    | 0.3736     | 3.0    | 0.05159    | 2.5    | 0.852       | 324.3      | 8.0     | 322.3      | 8.2     | 308.6       | 35.4    | -5.1    |
| PLES-11               | 541     | 40487       | 10.23 | 18.848      | 2.3    | 0.3959     | 3.5    | 0.05414    | 2.7    | 0.770       | 339.9      | 9.0     | 338.7      | 10.2    | 330.2       | 51.1    | -2.9    |
| PLES-12               | 582     | 8619        | 11.80 | 19.493      | 1.7    | 0.3733     | 2.7    | 0.05280    | 2.0    | 0.756       | 331.7      | 6.5     | 322.1      | 7.4     | 253.3       | 40.1    | -30.9   |
| PLES-13               | 780     | 311201      | 9.49  | 18.582      | 2.1    | 0.3903     | 3.4    | 0.05262    | 2.6    | 0.773       | 330.6      | 8.4     | 334.6      | 9.6     | 362.3       | 48.0    | 8.8     |
| PLES-14               | 540     | 22518       | 11.46 | 19.112      | 1.9    | 0.3957     | 3.1    | 0.05487    | 2.4    | 0.779       | 344.3      | 8.0     | 338.5      | 8.8     | 298.6       | 43.9    | -15.3   |
| PLES-15               | 713     | 69525       | 9.51  | 18.164      | 6.2    | 0.3801     | 10.8   | 0.05010    | 8.9    | 0.818       | 315.1      | 27.3    | 327.1      | 30.3    | 413.4       | 139.1   | 23.8    |
| Plesovice no CA Run 2 |         |             |       |             |        |            |        |            |        |             |            |         |            |         |             |         |         |
| PLES 1                | 653     | 3475891     | 10.39 | 18.775      | 1.5    | 0.3969     | 3.1    | 0.0541     | 2.7    | 0.875       | 339.4      | 8.9     | 339.4      | 8.9     | 338.9       | 33.8    | -0.1    |
| PLES 10               | 701     | 278674      | 7.82  | 18.878      | 2.3    | 0.3971     | 3.2    | 0.0544     | 2.3    | 0.712       | 341.4      | 7.7     | 339.5      | 9.4     | 326.6       | 51.8    | -4.5    |
| PLES 11               | 543     | 141751      | 11.36 | 18.757      | 1.8    | 0.4001     | 2.5    | 0.0545     | 1.8    | 0.71        | 341.8      | 5.9     | 341.7      | 7.3     | 341.2       | 39.8    | -0.2    |
| PLES 12               | 577     | 193554      | 10.9  | 18.828      | 2.2    | 0.4001     | 3.1    | 0.0547     | 2.3    | 0.727       | 343        | 7.6     | 341.7      | 9.1     | 332.6       | 48.9    | -3.1    |
| PLES 13               | 674     | 631867      | 10.08 | 19.032      | 2.2    | 0.3984     | 3      | 0.055      | 2      | 0.678       | 345.2      | 6.9     | 340.5      | 8.7     | 308.1       | 50.4    | -12.0   |
| PLES 14               | 808     | 421926      | 11.7  | 18.728      | 1.8    | 0.4009     | 2.8    | 0.0545     | 2.2    | 0.772       | 342        | 7.2     | 342.3      | 8.2     | 344.6       | 40.4    | 0.8     |
| PLES 15               | 521     | 100432      | 10.27 | 18.646      | 3      | 0.401      | 3.7    | 0.0543     | 2.2    | 0.592       | 340.6      | 7.4     | 342.4      | 10.9    | 354.6       | 68.2    | 3.9     |
| PLES 16               | 806     | 352390      |       |             |        |            |        |            |        |             |            |         |            |         |             |         |         |

|         |      |         |       |        |     |        |     |        |     |       |       |     |       |      |       |      |       |
|---------|------|---------|-------|--------|-----|--------|-----|--------|-----|-------|-------|-----|-------|------|-------|------|-------|
| Ples 2  | 614  | 319188  | 11.04 | 18.76  | 2   | 0.3994 | 3.2 | 0.0544 | 2.5 | 0.78  | 341.3 | 8.4 | 341.2 | 9.3  | 340.7 | 45.6 | -0.2  |
| Ples 20 | 853  | 232811  | 10.13 | 18.573 | 2.4 | 0.4102 | 3.4 | 0.0553 | 2.4 | 0.713 | 346.9 | 8.2 | 349   | 10   | 363.4 | 53.6 | 4.5   |
| Ples 21 | 1295 | 236821  | 5.97  | 18.615 | 2.1 | 0.4025 | 3.3 | 0.0544 | 2.6 | 0.776 | 341.2 | 8.5 | 343.4 | 9.7  | 358.3 | 47.2 | 4.8   |
| Ples 22 | 1321 | 2259381 | 6.57  | 18.807 | 2.4 | 0.4106 | 3.3 | 0.056  | 2.2 | 0.668 | 351.4 | 7.5 | 349.3 | 9.7  | 335.1 | 55.2 | -4.9  |
| Ples 23 | 807  | 617220  | 11.76 | 18.794 | 2.3 | 0.4014 | 3.7 | 0.0547 | 3   | 0.794 | 343.5 | 9.9 | 342.6 | 10.9 | 336.7 | 51.4 | -2.0  |
| Ples 24 | 741  | 85245   | 9.64  | 18.694 | 2.3 | 0.4028 | 3.3 | 0.0546 | 2.3 | 0.703 | 342.9 | 7.7 | 343.7 | 9.5  | 348.8 | 52.4 | 1.7   |
| Ples 25 | 606  | 44589   | 10.39 | 19.173 | 2.7 | 0.3903 | 3.6 | 0.0543 | 2.4 | 0.658 | 340.9 | 7.8 | 334.6 | 10.2 | 291.3 | 61.6 | -17.0 |
| Ples 26 | 831  | 162548  | 10.43 | 18.789 | 2.5 | 0.4005 | 3.1 | 0.0546 | 1.9 | 0.596 | 342.7 | 6.2 | 342   | 9    | 337.3 | 56.4 | -1.6  |
| Ples 27 | 973  | 205513  | 8.43  | 18.793 | 3.2 | 0.3972 | 4   | 0.0542 | 2.5 | 0.614 | 340   | 8.1 | 339.6 | 11.5 | 336.8 | 71.4 | -1.0  |
| Ples 28 | 1002 | 198228  | 9.36  | 18.784 | 2.5 | 0.4012 | 3.3 | 0.0547 | 2.2 | 0.659 | 343.2 | 7.2 | 342.5 | 9.5  | 337.9 | 55.7 | -1.6  |
| Ples 29 | 954  | 1114465 | 9.13  | 18.629 | 2.4 | 0.3939 | 3.2 | 0.0533 | 2.1 | 0.657 | 334.4 | 6.8 | 337.2 | 9.1  | 356.6 | 54   | 6.2   |
| Ples 3  | 1073 | 392546  | 9.63  | 18.904 | 2.1 | 0.3974 | 3   | 0.0545 | 2.2 | 0.725 | 342.2 | 7.4 | 339.8 | 8.8  | 323.4 | 47.6 | -5.8  |
| Ples 30 | 926  | 1012948 | 9.16  | 18.813 | 2.2 | 0.3969 | 3.2 | 0.0542 | 2.3 | 0.724 | 340.1 | 7.6 | 339.4 | 9.2  | 334.4 | 49.7 | -1.7  |
| Ples 4  | 882  | 47466   | 9.58  | 18.87  | 3.3 | 0.3974 | 4.4 | 0.0544 | 2.8 | 0.648 | 341.5 | 9.4 | 339.7 | 12.6 | 327.6 | 75.3 | -4.2  |
| Ples 5  | 1003 | 533642  | 9.72  | 18.612 | 2.2 | 0.4013 | 3   | 0.0542 | 2.1 | 0.681 | 340.2 | 6.8 | 342.6 | 8.8  | 358.6 | 49.8 | 5.1   |
| Ples 6  | 972  | 995204  | 8.39  | 18.839 | 2   | 0.4034 | 2.8 | 0.0552 | 2   | 0.704 | 346.1 | 6.7 | 344.1 | 8.2  | 331.2 | 45.3 | -4.5  |
| Ples 7  | 1248 | 513284  | 8.23  | 18.904 | 2.2 | 0.4036 | 3.4 | 0.0554 | 2.6 | 0.767 | 347.3 | 8.7 | 344.2 | 9.8  | 323.4 | 49.2 | -7.4  |
| Ples 8  | 957  | 89714   | 8.84  | 18.604 | 2.8 | 0.4038 | 4.1 | 0.0545 | 2.9 | 0.718 | 342.1 | 9.8 | 344.4 | 11.9 | 359.6 | 64.1 | 4.9   |
| Ples 9  | 719  | 644052  | 10.77 | 18.952 | 2.6 | 0.3988 | 3.7 | 0.0548 | 2.7 | 0.716 | 344.2 | 9   | 340.8 | 10.8 | 317.7 | 59.3 | -8.3  |
